# Supplementary material for: An atlas of cell types in the mouse epididymis and vas deferens
Source: eLife. 2020 Jul 30;9:e55474. doi: 10.7554/eLife.55474 (PMC7426093; doi:10.7554/eLife.55474)
Supplement: Supplementary file 2. — Log2 fold enrichment for 11089 genes across the 21 cell clusters (Figure 2A) from the full dataset. [file elife-55474-supp2.xlsx]

## Sheet: 21C_AGG_tocluster2
NAME	C1	C2	C3	C4	C5	C6	C7	C8	C9	C10	C11	C12	C13	C14	C15	C16	C17	C18	C19	C20	C21
Teddm1	6.60381	-1.37887	0.00804814	-0.000274077	-0.00502003	-0.00905186	0.0208325	-0.00546177	-0.0051178	-0.589891	-1.80994	-0.563663	-0.253257	-0.0263698	-0.0117193	-0.548966	-0.694773	-0.00453471	-0.00466814	-0.525572	-0.127117
Defb18	6.48591	-0.773397	-0.138432	0.52196	-0.0988237	0.866913	-0.00967775	0	0	-0.783121	-2.23882	-0.718954	-0.384788	-0.0415717	-0.0218398	-0.755926	-0.929034	-0.092953	-0.0895986	-0.534511	-0.252488
Defb47	6.16299	0.579274	-0.308213	0.0206425	0.378392	-0.000228718	-0.00624891	-0.0110217	-0.0103286	-0.592554	-1.55171	-0.688864	-0.395712	-0.0395127	-0.025681	-0.642039	-0.861847	-0.0120631	-0.0170916	-0.649662	-0.193631
Clpsl2	6.1535	-0.76552	-0.0598486	-0.0219324	-0.0456903	-0.0303154	-0.0109578	-0.00886119	-0.00830281	-0.676855	-2.3447	-0.687961	-0.30015	-0.0357489	0.0502501	-0.786404	-0.875996	-0.0103624	-0.0107664	-0.648809	-0.145297
Spag11b	6.15171	-1.54372	-0.115133	0.0954392	0.112177	-0.0623987	-0.033752	-0.0286879	-0.0515694	-0.781945	-2.5075	-0.762769	-0.322214	-0.0868239	0.100255	-0.634099	-0.938136	0.0662387	-0.0610344	-0.730394	-0.225932
Lcn6	6.07629	-0.744904	-0.0164525	-0.013645	-0.0555015	-0.0196904	-0.000303981	0	0	-0.584766	-1.59022	-0.625224	-0.289538	-0.0238003	-0.00811565	-0.663897	-0.774152	-0.00179136	-0.00254158	-0.46741	-0.143681
Ly6g5c	5.98168	-0.986954	0.0109809	-0.0309215	0.251428	-0.0525557	-0.117803	-0.0995931	-0.093475	-0.594617	-1.69323	-0.649528	-0.305571	-0.116984	0.147061	-0.640613	-0.736682	0.27084	0.441881	-0.624052	-0.196851
9230104L09Rik	5.96194	-1.35805	-0.0171923	0.0753721	-0.0025617	-0.0278014	0.138876	0.0436044	-0.0937178	-0.576853	-1.73959	-0.556033	-0.296157	-0.11719	-0.0370601	-0.405175	-0.667967	-0.0106555	-0.0912221	-0.507971	-0.194697
Lypd8	5.94627	-1.02943	0.032086	-0.0557769	-0.0168704	0.163473	-0.011946	-0.00946416	-0.00886815	-0.577003	-1.62147	-0.570426	-0.135702	0.0153617	-0.0166454	-0.559253	-0.666298	-0.015284	-0.0146207	-0.4248	-0.132401
Cst11	5.74687	-1.30292	0.108721	-0.00607024	0.145552	-0.00864062	-0.000691233	0.0318034	-0.0116636	-0.653261	-1.54911	-0.632762	-0.295489	0.041007	-0.0208241	-0.636576	-0.727488	-0.0144751	-0.0144806	-0.608595	-0.156618
9230110F15Rik	5.73351	-1.18531	-0.00960216	-0.00561001	-0.000222604	-0.0118308	-7.37899e-05	0	0	-0.434023	-1.40567	-0.545042	-0.218755	-0.0195663	-0.00562839	-0.44106	-0.628695	-0.000753359	-0.000648546	-0.427869	-0.11419
Gpx5	5.63424	-1.07477	0.0812172	0.227151	0.124716	0.618796	0.0383088	-0.0370656	-0.034732	-1.00421	-2.74326	-0.846116	-0.41607	-0.0785354	-0.0569653	-1.16073	-1.1383	0.00230222	0.00312038	-0.882353	-0.193812
Defb45	5.61152	-1.0971	0.0421036	-0.0375782	-0.0824576	-0.0442363	-0.0266886	-0.0219195	-0.0205452	-0.573055	-1.92812	-0.667302	-0.31357	-0.0456932	0.0290477	-0.604114	-0.524842	-0.0231655	-0.0240425	-0.5728	-0.0952421
Defb20	5.59962	-0.734131	1.98913	1.15611	1.39111	0.698334	-0.0320323	0.0522201	-0.0590944	-1.50382	-1.76812	-1.40601	-1.046	0.0175677	-0.128145	-1.0585	-1.74346	-0.0671197	0.0982211	-1.16545	-0.614602
Lcn9	5.51611	-1.03731	-0.00977137	-0.00752884	-0.000279193	-0.0159922	-0.00821781	0.139042	-0.0130896	-0.50844	-1.36445	-0.520381	-0.234795	-0.0324506	-0.019752	-0.400025	-0.558219	-0.0125433	-0.0125595	-0.495742	-0.120825
Defb25	5.49922	-0.662815	-0.151976	0.000718677	-0.1384	-0.0599274	-0.0811322	0.00117687	-0.0637498	-0.625811	-1.57873	-0.641544	-0.25048	-0.0198612	0.153667	-0.302855	-0.594328	-0.0622165	0.0610823	-0.565727	-0.200839
Rnase10	5.4924	-1.07639	-0.00863291	-0.00450194	-0.000173991	-0.0106178	0.0121027	-0.00315958	-0.00295969	-0.484048	-1.1703	-0.513893	-0.223852	-0.0209862	-0.00833094	-0.466833	-0.587296	-0.00321018	-0.00316112	-0.475348	-0.107549
Lcn8	5.38853	-0.501778	-0.0541699	0.216892	0.193676	-0.0867523	-0.00149748	0	0	-0.601715	-1.69008	-0.546974	-0.302374	-0.0247024	-0.0102322	-0.41096	-0.643153	-0.0119065	-0.0123332	-0.458545	-0.149939
Gm15386	5.24746	-0.351487	-0.0397493	-0.000739849	-0.028975	-0.00980382	-0.0100673	-0.00840791	-0.00787871	-0.58725	-1.35591	-0.637398	-0.226536	-0.0304255	-0.0155129	-0.512758	-0.740262	-0.0069715	-0.00754188	-0.552873	-0.139829
Cst12	4.91975	-0.743874	-0.00921324	-0.0452846	-0.00174663	0.0655013	-0.000598123	0	0	-0.453676	-0.811128	-0.382373	-0.193963	-0.0155249	-0.00476714	-0.341239	-0.464093	-0.00543043	-0.00477725	-0.173801	-0.0885356
Gpr64	4.78149	0.476416	-1.15158	-0.655329	-1.04837	-0.645097	-0.522238	-0.452879	-0.427409	-1.21894	-0.97513	-0.885655	-0.631312	0.233193	0.815819	0.771677	-0.115207	-0.121231	0.768101	-1.06246	-0.746155
Defb48	4.75624	-0.850577	0.19561	0.308466	-0.0823552	-0.000739434	0.0983195	-0.0578782	-0.0542382	-0.340237	-1.01229	-0.456541	-0.284606	-0.076309	-0.0683193	-0.458383	-0.565341	-0.0695401	0.0125529	-0.429876	-0.166315
Gm17727	4.70531	0.0953081	0.815217	-0.550361	1.49724	4.08156	-0.837424	-0.107654	-0.718929	-2.26805	-2.02842	-1.9161	-1.49594	-1.05823	-0.93358	-1.73864	-2.18636	-1.17429	-0.979079	-1.56171	-1.56869
Lcn10	4.69833	-1.05707	-0.00789696	7.26768e-17	-2.09751e-17	-0.00539966	5.99557e-17	0	0	-0.49719	-1.23377	-0.544038	-0.224901	-0.0176576	-0.00481795	-0.341204	-0.577973	2.83088e-17	-1.07445e-16	-0.484853	-0.10608
Gm5916	4.59919	-0.918477	-0.00699875	-0.000133626	-1.07343e-16	-0.00578398	-0.00458623	-0.00389322	-0.00364682	-0.459431	-1.11595	-0.482647	-0.203942	0.0302106	-0.00828723	-0.390428	-0.516045	-0.0032349	-0.00327753	-0.286222	-0.0954223
Cst8	4.55476	-0.787798	-0.00891117	-0.0100409	-0.000396142	-0.0149448	0.00624156	-0.00165615	-0.00155131	-0.476717	-0.910586	-0.505639	-0.21703	-0.0194905	-0.00682488	-0.452119	-0.524415	-0.00271254	-0.00254281	-0.404385	-0.106711
Adam28	4.5537	-0.948757	-0.0134008	0.0255378	-0.00522745	-0.0292262	-0.000375268	0	0	-0.431688	-1.18598	-0.436177	-0.211083	-0.0167781	-0.00505998	-0.232091	-0.533751	-0.00359975	-0.00319563	-0.309599	-0.098998
Mrpl37	4.47943	-0.835624	0.029229	0.173561	-0.0354825	-0.00800208	0.0971373	0.151679	0.699399	-0.0668203	-0.906552	-0.686338	-0.64098	-0.351014	-0.111569	-0.594127	-0.601472	0.444387	-0.0533882	-0.498932	-0.165972
Mfge8	4.42355	-0.455855	0.27896	-0.406393	2.02336	-0.305118	-2.24574	-1.86247	-1.22436	-2.17479	0.308071	-0.987254	-0.521831	1.29097	0.971831	0.590314	-0.352751	-0.697241	0.530104	-0.749644	-2.34822
Ly6g5b	4.34667	-0.874583	-0.0519456	-0.010286	-0.0445971	-0.0189902	-0.0381348	-0.0322476	-0.0302229	-0.456308	-1.0241	-0.471364	-0.189826	0.0156662	-0.00152681	-0.385549	-0.50106	0.026049	0.0951158	-0.130101	-0.11591
Defb41	4.1479	0.537777	-0.09634	-0.0155129	-0.0850988	-0.0208504	0.00956002	-0.00266638	-0.00249757	-0.417768	-1.28283	-0.72207	-0.231906	-0.0270621	-0.0115355	-0.552353	-0.809503	-0.00427491	-0.00554255	-0.588843	-0.155251
Mettl7a1	4.03738	0.487992	0.143895	-0.479792	0.395392	0.722596	-0.0502027	0.6322	0.371442	0.128056	-1.22001	-1.52365	-1.11906	-0.122073	0.00129064	-0.511632	-0.521873	0.238424	0.911145	-1.23016	-1.01661
Gm5531	3.88038	-0.627156	-0.00689122	-7.64983e-17	-1.683e-16	-0.00439436	-2.30673e-17	0	0	-0.418269	-1.26835	-0.540608	-0.211753	-0.016652	-0.00425906	-0.32616	-0.540376	9.12436e-17	-9.43568e-17	-0.410084	-0.101384
Slc1a1	3.85507	-1.73536	1.06297	-0.0434507	2.92014	2.39507	-0.235619	-0.183539	-0.172365	-0.518021	-1.69826	-1.5158	-1.35156	-0.293121	-0.188528	-0.862879	-1.65963	-0.3509	-0.343021	-0.891116	-0.881188
Adam7	3.74713	1.07133	0.822201	-0.416415	3.18143	2.90675	-0.448307	-0.287254	0.0439815	-4.04919	-4.06863	-3.27668	-3.30649	-0.622375	-0.433648	-3.63295	-4.70752	-0.571648	-0.867147	-2.08634	-1.93951
Bmyc	3.74387	0.254819	-0.260821	-0.436634	-0.541718	-0.386231	0.293756	0.384132	-0.209271	-0.504084	-1.37731	-0.828387	-0.713316	0.35783	0.0340414	0.232254	-0.426835	-0.155308	-0.228097	-0.528407	-0.106245
Gm1110	3.68226	3.34967	-0.655964	0.0763674	-0.504999	-0.0634593	0.0080717	-0.00355691	-0.00333249	-0.97157	-1.90545	-1.09674	-0.810326	-0.0565428	-0.0461823	-1.07335	-1.33618	-0.0101469	-0.0358864	-0.695525	-0.376864
Gm3336	3.66539	-0.639884	0.626263	0.678472	0.480212	0.195526	0.102989	0.12834	-0.0910682	-0.483938	-1.00809	-0.584031	-0.381286	-0.121995	-0.0162226	-0.52656	-0.581827	-0.144138	-0.0654153	-0.462726	-0.246078
Eppin	3.5774	-1.2346	1.88925	0.673081	2.83594	1.48644	-0.106208	-0.115895	-0.108776	-2.21536	-1.43145	-1.6245	-1.61872	-0.095908	-0.224181	-1.91095	-2.22339	-0.357104	-0.322558	-0.85697	-0.955674
Lap3	3.52638	0.667124	0.643185	0.167602	0.527383	0.0158486	0.954736	0.869865	0.702898	-0.316281	-1.44278	-1.12215	-0.751761	-0.825986	-0.734665	-0.205735	-0.689693	-0.592084	-0.563189	-0.772407	-0.00963824
Cldn2	3.51897	0.175074	0.0212571	-0.049382	0.125801	0.13001	0.150099	0.0283032	-0.0483793	-0.39736	-1.27157	-0.626377	-0.282449	-0.0677453	-0.0582423	-0.269158	-0.643625	-0.0496365	-0.0497341	-0.491635	-0.152114
Spink13	3.50156	-0.788365	0.886879	1.18439	0.84079	0.640209	0.015393	-0.07765	-0.0728625	-0.636668	-0.65943	-0.766084	-0.560907	0.0232647	-0.0684495	-0.484391	-0.808662	-0.129909	-0.176754	-0.508452	-0.296232
Ovch2	3.44914	0.559543	-0.0189321	-0.040259	0.191053	0.0921688	-0.00262	-0.00870588	-0.00815812	-0.431433	-0.565732	-0.551235	-0.271662	-0.0266558	-0.0177842	-0.421361	-0.531587	-0.0124219	-0.0150936	-0.430859	-0.128389
Fgg	3.44635	-0.711118	0.0464605	-0.079832	0.737064	0.214487	-0.00269163	-0.00599983	-0.00562194	-0.433065	-0.364488	-0.465597	-0.27351	-0.0245521	-0.0154927	-0.417126	-0.54706	-0.0153882	-0.0172052	-0.303968	-0.12754
Isyna1	3.43758	1.15491	0.550599	0.65793	0.439971	0.724043	-0.368133	-0.257722	-0.276833	-0.145323	-1.65695	-1.6965	-1.40499	0.0398181	0.768263	0.160843	-0.454672	-0.610166	0.121069	-0.761417	-1.00974
Bcl2l15	3.3626	1.70575	0.574826	1.52747	-0.0448662	1.23992	0.752729	-0.230016	0.352593	-0.88745	-1.11881	-1.15381	-0.900481	-0.759815	-0.636489	-0.742183	-1.41782	-0.846957	-0.758669	-1.09047	-0.793024
Lcn12	3.30973	0.698207	1.14155	1.48071	1.19305	1.62828	-0.164089	-0.0642543	0.361257	-1.55753	-1.41568	-1.27857	-0.806999	-0.34505	-0.453964	-0.793452	-1.54665	-0.465603	-0.326966	-0.840259	-0.690861
Ldhd	3.29841	0.518412	1.6889	1.08001	1.93814	2.04178	1.0634	0.685013	-0.077486	-1.68685	-1.35989	-1.30336	-1.12967	-1.04628	-1.14777	-1.51358	-1.96036	-1.30634	-1.18993	-1.546	-1.36446
Slc38a5	3.27198	-0.93746	-0.964795	-0.239643	-0.952844	-0.190824	-0.0932767	-0.0736446	-0.0690596	-0.998446	-0.230164	-0.835097	-0.685425	0.531451	0.0449976	0.925118	-0.144891	-0.0371866	-0.107867	-0.621474	-0.432382
Defb15	3.25293	3.18863	-0.519474	-0.0629176	-0.820991	0.0175108	-0.0159624	-0.0135402	-0.0126679	-0.750048	-1.83409	-0.855308	-0.638523	0.100249	-0.04425	-0.982946	-1.08588	-0.0156448	-0.034841	-0.638917	-0.280868
Bglap3	3.22802	-0.14685	0.659433	-0.164158	-0.162119	1.60847	1.36369	0.718742	-0.548689	-0.223042	-0.997955	-1.05779	-0.683883	-1.22889	-1.17049	-0.770823	-0.903307	-1.20859	-1.05042	-1.08343	-0.884379
Derl3	3.21468	1.95297	0.673046	0.206562	0.0522789	0.22637	0.603211	0.28024	-0.275293	-0.686136	-1.07784	-0.961304	-0.690951	-0.218478	-0.327236	-0.45411	-0.955103	-0.285874	-0.29864	-0.633399	-0.234388
Tpst2	3.21143	0.377355	0.202274	-0.0796896	0.591449	1.11497	-0.073345	-0.165033	-0.710454	-0.492852	-0.481647	-0.87821	-0.398966	0.300966	0.101924	-0.173091	-0.564829	-0.949031	-0.60332	0.190522	-0.27716
Cryba4	3.02079	0.82256	0.10875	1.74305	-0.324955	0.314398	-0.0142918	-0.0155266	-0.0145502	-0.724049	-0.963773	-0.712178	-0.553613	-0.0780351	-0.0565027	-0.63373	-0.788828	-0.199072	-0.221173	-0.312526	-0.236634
Ddit4l	2.97805	-0.33764	0.46113	0.605427	0.136043	-0.2467	-0.144689	0.345513	-0.301719	-0.647701	-0.969034	-0.435942	-0.482492	-0.104572	0.234319	-0.142725	-0.250729	0.0258395	0.17718	-0.648449	-0.402279
Ap1s2	2.92977	2.64439	-0.175681	-0.589451	-1.22426	-0.550135	-0.479284	-0.479732	-0.0220503	-1.44823	-2.38299	-2.0037	-1.35202	0.358409	0.404076	-0.489999	-0.272031	0.137385	0.68857	-0.658333	0.180055
Pdzk1	2.92015	0.240873	0.057926	0.0270035	-0.12805	0.754724	0.756379	0.952619	0.829195	-0.462185	-0.796531	-0.799348	-0.388557	-0.514765	-0.561736	-0.199936	-0.610746	-0.570412	-0.567413	-0.656471	-0.536384
Fdps	2.90621	0.343853	1.88226	0.533465	1.64232	1.67314	2.17806	1.20627	0.0622634	-0.889067	-1.65252	-1.97575	-2.0955	-2.57036	-3.08472	-1.99799	-2.23953	-2.58265	-2.74827	-2.11838	-2.64513
Bpi	2.87669	-0.227619	0.182108	0.528824	-0.0322088	0.234374	-0.00951221	-0.00511874	-0.00479476	-0.363346	-0.731739	-0.468373	-0.226864	-0.0229024	-0.013185	-0.33172	-0.464478	-0.0403728	-0.0363971	-0.229161	-0.11843
Rnf149	2.84163	2.67133	-1.54881	-1.85698	-2.02891	-1.31946	-0.94124	-0.900259	-0.734291	0.664531	-0.588379	-0.835096	-0.631813	0.524198	0.315444	-0.78878	-0.728466	-0.446508	-0.295677	-0.812752	1.97214
Slc7a5	2.77119	0.190412	-0.199245	-0.424519	0.769395	-0.0753802	-0.375279	-0.375298	-0.0204436	-0.797167	-0.471849	-0.447095	-0.00476918	-0.000707751	0.429518	0.148406	-0.426089	-0.0394962	0.553022	-0.171194	-0.273246
Hk2	2.6961	0.58769	0.667354	0.14031	0.318738	1.02268	-0.0798289	-0.126963	-0.423334	-0.495009	0.822931	-0.208829	0.1501	1.70187	-0.22778	-0.618621	-2.02791	-1.93373	-1.46162	-1.92112	0.733722
Tmem150c	2.67726	0.0418434	0.609369	0.0614901	0.841519	0.911613	0.378315	0.211543	0.0104505	-0.251628	-0.57933	-0.526138	-0.170882	-0.368151	-0.378616	-0.192059	-0.830516	-0.326917	-0.246109	-0.757253	-0.463267
Ddit3	2.64875	1.4956	1.13045	1.03443	0.344213	0.288096	1.38531	1.31532	1.25177	-0.278529	-1.97298	-2.33723	-2.06734	-1.80817	-0.721545	-1.91097	-0.770514	-1.24965	-1.24598	-1.96418	-0.9307
Sytl4	2.6016	1.04519	0.370929	0.324808	0.242923	0.0117134	-0.144028	-0.117218	-0.109906	-0.434171	-0.732061	-0.645129	-0.388632	-0.0455888	0.0511563	-0.272415	-0.551431	0.110325	0.451822	-0.344386	-0.242372
Pgap2	2.57827	1.33829	1.59892	0.470874	2.33508	2.55519	1.11412	0.887198	0.108446	-1.99197	-1.26438	-1.9226	-2.04062	-1.10991	-1.01396	-1.5207	-2.22116	-1.46702	-1.34674	-1.49328	-0.693454
Plekha3	2.56958	0.600499	0.70645	-0.113538	1.03624	0.174005	-0.677807	-0.79647	0.170917	-0.617806	-1.4064	-1.27228	-0.600298	0.147242	0.405917	-0.480182	0.0640697	0.846674	1.07268	-0.440662	-0.685545
Gm17677	2.55895	-0.262976	-0.00352016	-6.229e-17	2.06734e-16	-0.00209279	5.54483e-17	0	0	-0.305224	-0.422124	-0.365267	-0.148804	-0.0100942	-0.00227053	-0.00865019	-0.339826	1.40458e-18	2.02026e-16	-0.231335	-0.0613901
Gfra1	2.55509	1.26544	0.10626	0.138624	1.46844	-0.171686	-0.243963	-0.208934	-0.196552	-0.661023	-1.08056	-0.779898	-0.59518	-0.195515	0.70772	0.0625708	-0.374622	-0.228663	-0.110234	-0.395807	-0.386437
Serpinf2	2.54993	-0.329157	-0.0415621	-0.0344404	0.102502	0.00340539	-0.000525152	0	0	-0.251106	-0.592153	-0.403445	-0.159525	-0.0113871	-0.00365462	-0.236481	-0.370098	0.0421714	-0.00487257	-0.267429	-0.0720802
Hoxd4	2.51531	0.718674	0.899991	0.428387	0.807089	0.678786	0.996663	1.08401	0.790327	-0.213287	-0.666581	-0.719735	-0.2777	-1.02301	-0.969134	-0.578964	-0.937256	-0.981736	-1.03102	-0.923788	-1.05932
Pou3f1	2.50344	-0.737598	-0.419871	-0.243617	-0.638932	-0.320386	-0.542831	-0.469963	-0.444228	-0.550242	-0.407035	0.017601	-0.257909	-0.00336671	0.124934	0.134407	0.222807	-0.417281	-0.325957	0.0477695	-0.398629
Cldn14	2.5017	0.639661	0.571552	0.866515	1.23566	1.74609	0.558971	0.306971	0.154138	-0.838906	-0.703887	-0.872619	-0.711098	-0.464456	-0.487123	-0.707376	-0.933599	-0.593084	-0.445059	-0.680396	-0.656694
Zfp185	2.48506	0.690203	2.02108	0.870596	1.74792	1.03724	0.396402	0.156644	0.231851	-0.75204	-1.30934	-1.19893	-0.985533	-0.386006	-0.262462	-0.710515	-1.0606	-0.582737	-0.609767	-0.771096	-0.53394
Bsph1	2.47031	1.3658	-0.168334	-0.0281564	-0.16082	0.176836	-0.000908056	0	0	-0.368455	-1.04503	-0.50526	-0.256384	-0.0186197	-0.00840691	-0.42373	-0.558408	-0.00316305	-0.0056127	-0.401452	-0.114872
Elovl4	2.46675	-0.372734	-0.220334	-0.154943	-0.204124	-0.0567462	-0.366697	-0.315149	-0.297026	-0.463437	-0.572206	-0.522967	-0.169582	0.201306	0.871702	0.239773	0.00572185	-0.218173	-0.0978435	-0.415812	-0.191061
Ppy	2.46626	-0.292021	-0.014155	-0.000177011	-0.0107085	-0.00216829	-2.96269e-05	0	0	-0.118523	-0.615883	-0.313292	-0.143468	-0.00969741	-0.00251505	-0.213863	-0.345722	9.60008e-18	-0.00019429	-0.158626	-0.0594609
Rbm11	2.4328	0.572837	0.226787	-0.0534209	0.267559	-0.0158716	0.314473	0.533682	0.390043	-0.113821	-0.610291	-0.489997	-0.124859	-0.258583	-0.26827	-0.313971	-0.455308	-0.204821	-0.135622	-0.44148	-0.286448
Ivns1abp	2.425	0.484084	0.491684	0.1713	0.603376	0.0215442	0.870792	0.679119	0.58717	0.171385	-0.0771409	-0.380301	-0.006252	-0.403754	-1.12706	-0.231337	-1.34814	-1.62569	-0.980033	0.28487	-0.35929
Pmel	2.42317	-0.103164	0.0739311	-0.0098226	0.239065	-0.0127136	0.029992	-0.0176185	-0.0165126	-0.300379	-0.216766	-0.350212	-0.192831	-0.0282822	-0.0231587	-0.257497	-0.346781	-0.0156206	-0.0177943	-0.27587	-0.0880064
Tmem55b	2.42186	-0.00212043	0.742118	-0.0281457	-0.0645572	0.335915	0.809616	0.39116	0.0460138	-0.0687301	-0.0718886	-0.510906	-0.345672	-0.420003	-0.111809	-0.192098	-0.843012	-0.93201	-0.256664	-0.790146	0.112941
Nans	2.39708	0.989528	0.7184	0.713005	0.0528485	1.08803	0.7791	0.678783	0.916282	-0.346886	-0.641972	-1.01467	-0.778146	-0.933538	-0.385125	-0.299142	-0.651873	-0.805382	-0.719277	-0.470821	-0.248088
Obp2a	2.39662	-0.231986	0.0668214	-0.000289952	-0.00907312	-0.00257273	0.00617877	0.0231052	-0.00427229	-0.267005	-0.245955	-0.370063	-0.0594817	-0.0137031	-0.00660621	-0.0834364	-0.346106	-0.00376943	-0.00393638	-0.293917	-0.0601042
Hip1r	2.3848	-0.297767	0.813121	-0.0120226	0.809025	0.240615	0.193567	0.366492	-0.248634	0.642295	-0.347636	-0.438638	-0.351077	-0.420533	-0.245098	-0.533376	-0.818258	-0.322724	-0.167986	-0.284137	-0.51009
Insig1	2.38053	0.461297	0.698515	0.0660579	2.06517	2.11217	1.33919	0.318474	0.246073	-0.599385	-0.113663	-1.53663	-1.36265	-1.07391	-1.19216	-1.33952	-0.940691	-1.67396	-0.853839	-1.38343	-0.973075
Arfgef2	2.32068	-0.097699	0.382813	-0.0597301	0.990488	0.27326	0.183265	-0.0815353	-0.2302	0.594253	-0.228696	-0.685276	-0.442424	-0.187387	-0.0967909	-0.542169	-0.576445	-0.10052	0.497597	-0.372821	-0.239515
Creg1	2.31827	1.2288	0.329237	0.0502521	1.34205	0.939199	0.693415	1.07549	0.849239	-0.964531	-0.149536	-1.15288	-0.966015	-0.134881	-0.586827	0.503318	-0.560743	-0.820906	-0.51793	-1.15275	0.426349
Cldn10	2.29972	-0.34085	-0.0386048	-0.253714	-0.2214	-0.262324	-0.29518	-0.248284	-0.233652	0.764706	-0.601806	-0.5535	-0.219151	0.549856	0.711476	-0.0715668	-0.407533	-0.184563	-0.240425	-0.472193	-0.0986628
Gopc	2.29454	-0.682371	-0.0518581	0.0137106	0.189416	-0.15683	-0.0683921	0.0247368	0.350155	-0.504134	-0.105629	-0.318339	-0.173547	-0.435934	0.01374	0.140068	-0.197858	0.0186463	0.372502	-0.130251	-0.488718
Man1a	2.29176	2.11321	-1.47253	-0.912109	-1.16017	-0.963105	-1.38435	-1.16003	-0.867977	0.0491534	0.114995	-0.424096	0.0286588	0.215618	1.24019	0.176267	-0.724588	-0.999903	-0.548094	0.21942	0.940416
Creld2	2.26172	1.8854	0.451367	0.146716	1.26766	1.99136	0.691926	0.449342	0.373316	-1.35142	-0.130316	-0.833822	-0.757779	-0.507036	-0.467187	-0.44354	-1.33519	-1.23995	-0.628778	-1.18197	-1.0719
Lingo1	2.25643	0.5812	0.134661	0.0492535	-0.177959	-0.0554374	-0.0909381	-0.0853356	-0.0800571	-0.303905	-0.564175	-0.255443	-0.150409	-0.0936334	0.0275605	-0.170429	-0.376482	-0.0815298	-0.0830985	-0.244079	-0.142595
Hopx	2.24568	-0.734267	-0.679828	-0.567754	-0.756215	-1.04869	-1.16079	-0.938686	-0.545711	-1.26111	-1.09347	-1.38403	-1.13447	-0.500541	0.0789292	0.211321	0.982075	1.98357	1.6811	-0.427814	-0.75527
4932438H23Rik	2.24391	1.23226	0.959073	0.187505	1.34498	0.635513	0.473019	0.191449	0.322756	-0.602765	-1.02576	-0.749751	-0.730392	-0.397679	-0.194166	-0.504407	-0.788968	-0.285048	0.0527282	-0.525402	-0.531533
Syvn1	2.24342	1.90264	0.764319	0.531629	1.61547	1.49387	0.259311	0.205194	-0.3113	-0.749552	-0.892474	-1.1071	-1.00696	-0.287324	-0.0746085	-0.717049	-1.20753	-0.570863	-0.178023	-0.951737	-0.561671
Syne1	2.24261	-0.584458	-0.113267	-0.368009	0.263892	-0.446537	-0.643518	-0.586181	-0.555196	0.403298	-1.02835	-0.843508	-0.414148	0.600841	0.0995094	0.00606914	0.208164	0.271163	0.873467	0.160753	-0.377411
Gm4846	2.23801	-0.463368	-0.00298464	-6.0835e-18	-8.05919e-17	-0.00176138	7.20519e-18	0	0	-0.219818	-0.335554	-0.314098	-0.132594	-0.0088095	-0.0019433	-0.0709364	-0.237611	-5.2086e-17	1.48376e-17	-0.242888	-0.053525
Sdf2l1	2.20477	1.59234	0.84377	0.787411	1.35388	1.90416	0.588028	0.306749	0.3513	-1.46216	-0.265922	-0.992006	-0.839045	-0.54203	-0.45243	-0.773784	-1.27265	-1.25564	-1.00681	-0.808076	-0.00737276
Aldh1a7	2.18954	-0.927641	0.058581	0.546894	-0.022433	0.229413	0.0470505	-0.0726802	-0.116469	-0.467718	-0.415008	0.202271	0.247335	-0.15197	-0.0813554	-0.487127	-0.859484	-0.119829	-0.17941	-0.435674	-0.347634
Wipf3	2.13992	-0.267742	-0.0699604	-0.0773452	-0.15619	0.196557	-0.111282	-0.0906328	-0.0850151	-0.348716	-0.354852	-0.366016	-0.21182	-0.101586	-0.0596529	0.013539	-0.200469	-0.037885	-0.015192	0.307621	-0.164496
Cndp2	2.12965	0.404546	0.275069	-0.159076	-0.0601757	0.183613	0.175264	0.071336	-0.0484778	-0.154328	-0.427582	-0.53862	-0.386312	-0.286481	-0.362713	-0.235593	-0.567325	-0.424881	-0.000812564	-0.350525	1.925
Myo5b	2.12393	0.594972	0.882949	0.294914	1.42015	0.302216	0.445404	0.532442	0.331387	-0.383165	-0.557635	-0.538801	-0.358426	-0.256755	-0.35114	-0.577296	-0.760485	-0.189816	-0.327547	-0.449633	-0.202074
Acly	2.11293	1.98607	1.07539	0.963702	1.99979	1.79868	0.630005	0.185288	-0.928152	-0.644798	-1.71616	-2.05394	-1.82856	-0.639596	-0.617641	-1.15998	-1.47401	-0.415679	0.560517	-0.573287	-1.34941
Hs3st3b1	2.09803	-0.421247	-0.0929673	-0.139869	-0.080959	-0.0806175	-0.267934	-0.26812	0.0495808	-0.219663	-0.396792	-0.346052	-0.110591	-0.265136	-0.210947	-0.260095	-0.100298	0.744694	0.888516	-0.218434	-0.160597
C1qtnf9	2.06722	-0.425115	-0.0101989	-0.0154051	-0.00667313	-0.00374649	-0.00853834	-0.0210326	-0.0197151	-0.244442	-0.506131	-0.268972	-0.131829	-0.0281226	0.00489385	-0.072854	-0.2458	-0.019474	-0.019424	0.0237908	-0.0633604
Slc25a47	2.06531	-0.260504	0.386638	0.0925421	0.650541	0.0890535	0.0736856	-0.00903226	-0.0333389	-0.262056	-0.469955	-0.354484	-0.211837	-0.0463656	-0.00372493	-0.247749	-0.317512	-0.0486225	-0.0485961	-0.230074	-0.110504
Scrib	2.0477	-0.122041	0.300924	-0.0827442	0.762191	0.682078	0.15714	0.0646203	0.0940224	0.437696	-0.121724	-0.481684	-0.174774	-0.329045	-0.00283454	-0.437618	-0.598426	-0.258501	0.153707	-0.722462	-0.57737
Pabpc1l	2.04463	-0.322283	-0.0312673	0.0897385	-0.0246175	-0.030695	-0.00172306	-0.045023	0.209677	-0.109811	-0.460606	-0.302618	-0.104259	-0.0520216	0.0195351	-0.0861919	-0.220563	-0.05381	0.0460112	-0.0928672	-0.0874984
Nsdhl	2.03878	0.59749	1.35706	1.54549	1.7861	1.3315	0.527736	0.297021	-0.382219	-0.6306	-0.97516	-0.953324	-0.893461	-0.581568	-0.625772	-0.198021	-1.02891	-0.61115	-0.677656	-0.672507	-0.64669
Mettl7a2	2.03835	-0.150595	0.0214295	-0.110142	-0.0666476	0.0177454	-0.0212326	0.0690086	-0.0620636	0.0468299	-0.38008	-0.42716	-0.0770756	-0.0293899	0.00754593	-0.165138	-0.282665	-0.0120916	0.0819367	-0.291544	-0.122472
Akr1a1	2.03537	-0.0110681	0.620513	0.678806	0.654623	0.412354	0.624212	0.645128	0.467867	0.139094	-1.04762	-1.03346	-0.843564	-0.539459	-0.420101	-0.600199	-0.247446	-0.257065	-0.31359	-0.509604	0.349619
Acox1	2.03182	0.0743403	0.666796	0.11845	0.596752	0.219287	1.48963	1.10293	0.0773945	0.371733	-0.494633	-1.16609	-1.06147	-1.25064	-0.968359	-0.403481	-0.49346	-0.952512	-0.378144	-0.868774	-1.16672
Agr2	2.02441	1.74474	-0.142776	-0.00762977	-0.354396	-0.00806024	-0.0153376	-0.0119816	-0.0112177	-0.435566	-0.520705	-0.432417	-0.285449	-0.0296498	0.0130058	-0.269157	-0.478991	-0.00995327	0.065612	-0.359672	-0.127287
Bhlhe41	2.02224	-0.184818	-0.365583	-0.161324	-0.69159	0.106585	-0.24035	-0.313081	-0.140522	-0.511905	0.325863	-0.0131219	1.63395	-0.488124	-0.390984	-0.525934	-0.855309	-0.0952519	0.550369	-0.60293	0.0921838
Egr2	2.01299	0.842579	0.0341134	-0.0394547	0.597439	-0.170631	-0.280298	-0.0480717	0.104641	-0.153145	-0.410902	-0.576574	-0.373755	0.102362	1.04901	-0.201115	-0.311699	-0.537187	0.0239887	-0.849773	-0.282507
Fkbp11	2.00744	0.60347	0.152026	-0.111038	1.00666	1.17836	-0.291521	-0.0433498	0.0266264	0.107127	0.0308576	-0.727558	-0.4636	0.761731	0.255013	0.201163	-0.758127	-0.106648	0.0137823	-0.375993	-0.677268
Mospd1	2.00333	-0.784191	-0.352875	-0.553239	-0.656966	-0.336957	-0.0887926	-0.303672	-0.124301	-0.532513	-0.743493	-0.656538	-0.657745	-0.134854	-0.355949	0.311305	0.521836	0.329719	0.617239	0.398401	-0.501529
Idi1	2.00282	-0.0430646	1.30481	1.06805	1.39348	1.65796	1.43392	0.609564	0.165204	-0.486226	-0.823707	-1.04248	-0.96814	-1.58554	-1.71984	-1.12625	-1.21356	-1.95594	-1.17948	-1.21305	-0.988548
Rtcb	2.00206	0.0750937	0.421222	0.442238	0.48181	0.523221	-0.173763	0.299789	-0.489433	-0.205854	-0.320511	-0.330457	-0.257387	-0.093449	-0.101182	-0.359601	-0.468948	-0.16147	-0.035974	-0.237314	0.61599
Atp4a	1.98273	0.409585	1.03805	0.00354775	1.07055	0.0632265	0.405959	0.408432	0.338053	-0.247087	-0.470859	-0.593687	-0.442839	-0.22169	-0.231317	-0.280259	-0.593435	-0.184191	-0.194672	-0.433442	-0.195704
Araf	1.97606	0.0586664	0.237866	0.259019	0.438536	0.136153	0.0453529	0.0889388	-0.154037	-0.24666	-0.533842	-0.596853	-0.406319	-0.102056	-0.274982	-0.0245383	-0.14661	0.530783	0.463333	-0.286528	-0.700732
Ak1	1.97494	0.440151	-0.195383	-0.399473	-0.313037	-0.324569	-0.82459	-0.732632	-0.143015	-0.362118	-0.565119	-0.401418	-0.0273586	0.267231	1.36114	-0.150991	-0.343043	0.532453	0.521285	-0.562393	-0.50595
St6galnac4	1.96073	0.150408	0.206943	0.315558	0.424233	0.885346	-0.519457	-0.486372	-0.120886	-0.63186	-0.376161	-0.572148	-0.249471	0.150193	0.175779	-0.132682	-0.152585	-0.0456257	-0.06681	0.0169098	0.919144
Zfp648	1.94127	-0.26413	0.0561491	-0.000390098	0.174914	-0.00109323	-5.62725e-05	0	0	-0.175281	-0.261192	-0.275661	-0.125238	-0.00720973	-0.00193299	-0.14419	-0.267592	5.86271e-17	-0.000598151	-0.225624	-0.0456599
Rnf186	1.92602	-0.112119	0.386388	0.264747	1.39085	0.20621	0.236378	0.145423	-0.144474	0.0711222	-0.553555	-0.444764	-0.246879	-0.119424	-0.16895	-0.147882	-0.477092	-0.161348	-0.162789	-0.371213	-0.13979
Tbc1d8	1.90622	-0.137601	0.480626	0.091141	1.14881	0.460266	-0.0141138	0.0772901	0.224258	-0.458498	-0.0992043	-0.437441	-0.28662	-0.151362	-0.169756	-0.384116	-0.520895	-0.180782	-0.0679755	0.569488	0.0395397
Hmgcs1	1.90555	0.327287	0.612534	1.10979	1.13671	1.58742	1.34362	0.993013	0.347556	-0.0684105	-0.0481873	-0.75481	-0.74192	-1.73397	-1.84955	-1.38251	-1.36203	-1.54823	-0.954684	-1.6192	-1.68456
Armcx6	1.876	-0.213687	-0.306482	-0.127676	-0.296473	-0.155706	-0.302534	-0.268282	-0.251988	-0.390253	0.157492	-0.300605	-0.0484292	-0.0397742	0.14879	0.229413	-0.124841	0.166497	-0.00933821	-0.409846	0.595739
Hoxb7	1.87	0.89112	1.20089	0.991942	0.561278	0.629666	1.47109	1.34337	0.062425	0.0501214	-0.690903	-0.828862	-0.761509	-1.48306	-1.37012	-0.841458	-1.16512	-1.31151	-1.29477	-0.335872	-1.26756
Slc17a9	1.86432	-0.0137103	0.687121	-0.0130157	0.681793	0.263336	0.00767939	-0.0209987	-0.0461538	-0.287552	-0.499307	-0.361376	-0.166151	0.00104353	-0.0242788	-0.258583	-0.373317	-0.0579376	-0.0596373	-0.20369	0.0736617
Cnksr2	1.8626	0.75479	0.537995	0.0350066	0.104024	-0.0155681	0.0114734	0.0413014	-0.0428353	-0.280538	-0.587581	-0.399875	-0.205172	-0.0547685	0.00289536	-0.251392	-0.350962	-0.0420995	0.0367064	-0.164015	-0.112843
Commd4	1.85632	-0.219685	1.17274	0.575115	0.616979	0.462674	0.501671	0.534491	0.283732	0.14838	-0.277764	-0.718374	-0.568847	-0.454416	-0.345349	-0.463812	-0.648897	0.415484	0.13556	-0.504173	-0.575442
Pnp	1.85095	-0.385327	-0.485679	0.0487728	-0.300472	-0.319301	-0.208715	0.286247	-0.0118534	-0.469481	-0.609837	-0.428955	-0.233002	0.636203	0.431545	0.616905	-0.0542539	-1.16471	-1.00488	0.494766	0.7402
Lipi	1.83394	0.629759	-0.0776957	-0.00144912	0.467446	-0.00170519	-0.000224475	0	0	-0.252157	-0.391863	-0.317555	-0.150699	-0.00862951	-0.00390364	-0.18271	-0.319915	-4.83403e-17	-0.00185686	-0.157005	-0.0585694
Amot	1.82943	-0.694445	-0.413786	0.0209021	-0.188898	0.829393	0.152897	-0.0702426	-0.128072	0.734607	-0.251044	-0.624808	-0.484884	-0.38215	-0.395593	-0.147395	-0.658314	0.844286	0.878037	-0.437679	-0.786027
Hoxb6	1.82544	1.1846	1.17671	1.04611	0.920591	0.756388	1.5975	1.50213	0.670731	-0.0752207	-0.174797	-1.01147	-0.61976	-1.65984	-1.47528	-1.1169	-1.33413	-1.65798	-1.43859	-1.10701	-1.18978
Espn	1.82024	1.26019	1.25613	0.962439	1.813	1.63129	0.747022	0.690154	0.18919	-0.977736	-0.88132	-0.887009	-0.886942	-0.656618	-0.67729	-1.1197	-1.05526	-0.827481	-0.600092	-1.01643	-1.01572
Pgp	1.76583	1.09304	1.65163	0.873764	1.14229	0.876142	1.00266	0.797489	0.501791	-0.413181	-0.664999	-1.22875	-1.26069	-0.722657	-0.627786	-0.393874	-0.663977	-0.561664	0.120426	-0.958763	-1.20006
Slc50a1	1.76313	0.306864	0.415435	0.164328	0.472812	0.817151	0.218807	0.12864	0.0318522	-0.186192	0.366531	-0.603084	-0.476673	-0.170382	0.0633353	0.00806642	-0.561217	-0.468142	-0.535171	0.545272	-0.478442
Vps37b	1.75353	-0.408482	0.135612	-0.179733	-0.133533	0.616852	0.0546841	-0.205668	0.0490831	0.715404	-0.418026	-0.322256	-0.392665	-0.389952	-0.492047	-0.458305	-0.375351	-1.29566	-1.0272	1.17799	0.139921
Ncf2	1.75292	0.204724	-0.0333537	-0.0443957	0.313101	0.482793	-0.281091	-0.569598	0.995757	-0.423692	0.432199	-0.681816	0.93695	-0.385514	-0.379466	0.078305	-0.192469	-0.711064	0.923135	-0.50252	1.0164
Prrg3	1.74398	1.46814	0.61334	0.504048	1.39642	0.530973	-0.132261	-0.148186	0.499288	-0.533046	-0.706836	-0.802872	-0.555373	-0.0194254	0.420589	-0.34509	-0.560316	-0.219311	-0.226915	-0.491776	-0.35625
Ppapdc2	1.73722	0.137868	0.928442	0.523863	1.37457	0.834562	0.0489661	-0.0558675	-0.205674	0.0518616	-0.390667	-0.477159	-0.500728	-0.0543344	-0.0952659	-0.533036	-0.704059	-0.15115	-0.197305	-0.1406	-0.120441
St3gal2	1.72791	-0.241188	0.184765	-0.155865	-0.196221	-0.132282	-0.308192	-0.259869	-0.244734	-0.110298	-0.374838	-0.324686	-0.153233	-0.144712	0.211285	-0.134409	-0.14468	0.49263	0.554244	-0.0703569	-0.0557694
Etv5	1.72504	-0.505844	-0.24792	-0.201727	-0.0847572	-0.00556318	0.033186	-0.0187489	0.138123	-0.29011	-0.0751846	-0.0928893	0.0777471	-0.0285666	-0.0327209	0.225688	-0.174202	-0.260144	-0.297408	-0.213612	0.0614616
Cst6	1.72391	-0.297388	-0.0344727	-0.0405837	-0.0305949	-0.04211	0.00331533	-0.0347942	-0.032618	-0.11726	-0.386633	-0.225231	-0.0687509	-0.0401153	-0.0378082	0.195428	-0.203031	0.0919471	-0.0342363	-0.150053	-0.0669309
Smim22	1.72332	1.24102	0.742608	0.359434	0.0799748	0.326527	0.400296	0.200686	0.431263	0.971632	-0.972492	-0.553581	-0.412436	-0.321199	-0.412329	-0.735297	-1.00353	-0.372674	-0.450173	-0.621568	-0.295429
Capg	1.71494	-0.46855	1.0453	0.138107	0.82686	0.760418	0.0464509	0.118524	-0.0172325	-0.645571	-0.876348	-0.213548	-0.28375	0.382324	0.601518	-0.202898	-0.772319	-0.846581	-0.936722	0.231631	0.0379836
Galnt12	1.70495	1.3972	-0.052434	0.0123262	-0.325276	0.200592	0.0306332	-0.0161687	-0.0151519	-0.25966	-0.282084	-0.417415	-0.205667	-0.0314509	-0.02797	-0.17811	-0.419001	-0.02601	-0.0302457	-0.195513	0.126939
Gmppb	1.70172	1.31864	1.07936	0.793523	1.02046	1.3214	0.753065	0.824212	0.311737	-0.657237	-0.553336	-0.789905	-0.624992	-0.650895	-0.527091	-0.231731	-0.79334	-0.888664	-0.782713	-0.632043	-0.517573
Tmem160	1.65562	0.335676	-0.383618	0.510834	0.192982	1.2336	0.629722	0.219788	0.249259	-0.0748752	-0.458241	-0.678311	-0.546727	-0.604081	-0.769356	-0.372403	-0.372298	0.0425123	0.150098	-0.243653	0.0238925
Slc20a1	1.65542	0.427541	-0.115258	-0.0891621	0.719766	0.677396	0.280963	-0.192494	0.251133	0.0272219	0.181179	-0.520706	-0.397716	-0.528987	-0.127461	-0.432639	-0.584131	0.120468	0.416345	0.263923	-0.178195
Rbm26	1.64062	0.358773	0.0381701	-0.357981	0.187712	0.111533	-0.0990583	-0.0745238	0.295634	0.0104977	0.468886	-0.508136	0.0641879	0.134687	-0.0944357	0.242412	-0.155132	-0.254704	0.687912	-0.168869	-0.439591
Armcx3	1.61546	-0.229451	-1.05877	-0.956737	-1.01006	-1.04258	-1.34503	-1.05493	-0.616725	-0.164077	-0.0125085	-0.559444	-0.248537	-0.00783729	0.514239	0.809196	0.426659	0.944584	1.24192	-0.377831	0.228189
B4galnt1	1.61295	0.409849	-0.0434025	-0.192119	0.0662798	-0.32523	-0.466823	-0.392061	-0.370015	-0.256079	0.406347	0.156689	0.30361	0.0886918	0.157364	0.329998	-0.357497	-0.337043	-0.30408	-0.408506	-0.149587
Herpud1	1.60623	0.999811	0.174973	-0.365809	1.49833	1.24607	-0.210797	0.412879	0.616905	-1.0815	-1.23757	-1.86688	-1.56699	-0.685417	0.364459	0.735045	-0.158516	-0.275399	1.35353	-1.37339	-0.696959
Wbp1l	1.60273	0.169012	0.415896	-0.253695	0.767187	0.265704	0.0681236	-0.0496969	0.0507501	1.09277	-0.681856	-0.526933	-0.3408	-0.5223	-0.426717	-0.552849	-0.45036	-0.188247	0.0645793	0.0315962	-0.363433
Urod	1.59545	0.0182057	0.678272	0.11497	0.649801	0.325915	0.291415	0.744644	-0.0137251	0.205021	-0.349886	-0.640142	-0.48378	-0.386737	-0.594154	0.138653	-0.357226	0.102472	0.397202	-0.299976	-0.515259
Atp6v0a1	1.58391	0.223054	1.06845	0.255068	1.57344	1.25069	1.1003	0.505807	0.13598	-0.212917	-0.184569	-0.791124	-0.708353	-1.05158	-0.690451	-0.545988	-0.683202	-0.635037	-0.0146201	-0.682837	-0.387484
Mrpl41	1.57686	0.384333	0.924783	0.306002	0.219385	0.0326992	0.746855	0.931065	0.089919	0.0293374	-0.32776	-0.683116	-0.38292	-0.416952	-0.474082	-0.146554	-0.483796	-0.0932654	-0.0775526	-0.821887	-0.331916
Romo1	1.56856	0.392938	1.35051	1.07232	-0.487818	0.500519	1.43546	0.598703	-0.0448767	0.187439	-1.07102	-0.905836	-0.499699	-1.71023	-1.68816	-1.17294	-0.790521	0.536736	-0.30283	-1.61298	-1.70492
Greb1	1.56451	-0.383045	0.723351	0.103774	1.16287	0.124963	-0.0458219	-0.0356145	-0.0333852	0.144076	-0.524517	-0.388467	-0.28019	-0.000374816	0.0742802	-0.174042	-0.358899	-0.0567199	0.0160459	-0.17975	-0.146267
Glul	1.54344	1.34914	-1.29713	-0.377997	-1.05426	-0.418192	-1.3774	-1.3065	-0.0469322	0.0470778	-1.24224	-0.388569	-0.350051	0.526554	0.442017	-0.0199887	0.478093	-0.602749	-0.119237	-0.183645	-0.160166
Pgpep1	1.54095	-0.0460881	0.140097	-0.112456	0.0586988	0.0750919	0.18105	0.281625	0.2255	0.0919975	-0.0192414	-0.335226	-0.0549659	-0.214713	0.00416557	-0.253672	-0.301032	-0.180191	-0.359138	-0.120751	0.182305
Arpc5l	1.53519	0.234599	1.1701	0.55163	1.06257	0.476228	1.2848	0.873973	0.198206	-0.286311	-0.280059	-0.894702	-0.823987	-0.788124	-0.684333	-0.557656	-0.485399	-0.397892	-0.349944	-0.776509	-1.02879
Med28	1.52989	0.322983	1.38684	0.00994422	0.809853	0.0500927	1.47958	0.79818	0.0104916	0.343644	-0.948213	-0.800542	-0.754274	-1.04894	-0.825332	-0.913575	-0.872066	-0.568029	-0.577679	-0.542876	-0.254363
Inpp5d	1.52802	-0.298272	-0.0553174	-0.0719424	-0.0499839	-0.074407	-0.0762906	-0.063799	-0.0598555	-0.211113	-0.223604	-0.255305	-0.04873	-0.0675919	-0.0680581	-0.00762771	-0.24316	-0.0624655	-0.0624357	0.490459	0.73786
Tmed4	1.52323	0.593438	0.604866	-0.45047	1.41794	1.20634	0.556431	0.894948	-0.0840289	0.159547	-0.00631766	-0.962956	-0.626734	-0.682089	-0.461525	-0.31327	-0.284178	-0.711586	0.0433149	-0.512666	-0.646792
Polr3d	1.52134	0.524952	0.687963	0.660051	0.664368	0.321822	0.0758193	0.205372	-0.721371	-0.453897	-0.277642	-0.0810109	0.197321	0.0750571	0.147079	-0.329583	-0.532614	-0.754777	-0.562664	-0.366972	-0.744345
Atp6v1g1	1.51821	0.606396	1.40654	0.701423	-0.0809777	-0.184207	1.15601	0.446854	0.267948	0.229229	-1.65845	-0.678693	-0.7116	-1.53824	-1.42119	-1.36001	-0.862774	0.974351	-0.42533	-0.707633	0.256389
Emid1	1.51344	0.475818	-0.0251677	-0.0909603	-0.174592	-0.0460442	-0.422132	-0.373032	-0.352288	-0.301215	-0.495638	-0.439004	-0.298767	-0.198563	0.737547	0.0706961	0.0273645	-0.0254404	-0.0807683	0.309908	-0.300283
Per1	1.51343	0.48278	0.946695	0.0588909	1.41887	0.424519	0.321	0.371617	0.192943	0.00895704	-0.127774	-0.569601	-0.447569	0.132216	-0.0621071	-0.203183	-0.629731	-0.211521	0.262351	-0.550996	-0.505189
Mroh2a	1.50951	0.260158	0.453156	-0.0238189	-0.0980562	0.086265	0.13424	0.0287191	0.534122	-0.14261	-0.335609	-0.267145	-0.157787	-0.0885777	-0.0908092	-0.144091	-0.240497	-0.0737927	-0.0759585	-0.23809	-0.103889
Tpd52l1	1.50816	-0.33518	-0.309698	0.249549	-0.587007	0.0379962	0.260904	0.147353	0.617052	-0.255016	-0.433067	-0.576442	-0.42093	0.0227829	-0.188951	-0.213459	0.347296	0.137299	0.0876273	-0.713542	-0.717371
Acad8	1.49603	0.654127	0.42561	0.364489	1.32644	0.309048	0.538467	0.776628	0.0516017	-0.0640631	-0.444974	-0.65588	-0.538308	-0.442789	-0.353733	-0.310062	-0.291993	-0.214077	0.0537617	-0.395729	-0.52144
Gpd1	1.49583	0.242041	1.01277	0.173995	0.566112	0.460887	-0.00623151	-0.00287441	-0.0450388	0.197538	-0.558476	-0.431961	-0.292852	-0.0639816	-0.0658199	-0.262825	-0.418175	-0.081604	-0.0841685	-0.301545	-0.178084
Abhd2	1.49502	0.68075	0.435775	-0.0166754	0.961917	1.21612	0.379798	0.429769	0.415429	-0.172363	0.428739	-0.362416	-0.125661	-0.427571	-0.197508	-0.497889	-0.753778	-0.615773	-0.345267	-0.281493	-0.518584
Ros1	1.49278	1.07885	0.0377839	-0.0027724	0.0758375	-0.00667566	-0.00420474	0.0234465	0.278732	-0.240332	-0.440451	-0.293973	-0.156283	-0.0300904	-0.0276957	-0.183014	-0.278856	-0.0190565	0.0958202	-0.227422	-0.0719882
Capn5	1.48854	0.136384	0.298731	0.259742	0.237258	0.761722	0.712425	0.536929	-0.0960759	0.431641	-0.313381	-0.513674	-0.368664	-0.557028	-0.328619	-0.379804	-0.561589	-0.57124	-0.494912	-0.250734	-0.43842
Fkbp5	1.48849	0.573266	1.10334	0.496379	0.699015	0.586599	-0.0379663	-0.0561215	-0.298677	-0.294708	-0.420295	-0.257916	-0.279491	0.0358567	0.101612	0.00313574	-0.454216	-0.707829	-0.54488	-0.354153	-0.787502
Armcx1	1.48564	-0.267752	-0.175684	-0.232092	-0.310495	-0.240619	-0.506898	-0.421121	-0.0834621	0.311443	-0.523081	-0.457836	-0.360351	0.326905	0.467683	-0.0356002	0.142852	0.422242	0.453195	-0.446035	-0.445458
Atp6v1b2	1.48451	0.208181	0.910693	0.04778	0.35165	-0.0553491	0.208848	0.154193	-0.211462	0.82008	0.219922	-0.249979	-0.203666	-0.427979	-0.444827	-0.614285	-0.693234	-0.374615	-0.374074	-0.304301	0.249596
Hpdl	1.47929	-0.092842	0.648759	0.337846	0.53707	0.748534	0.0025863	0.0926287	0.249517	-0.267791	-0.376568	-0.37575	-0.24399	-0.0825999	-0.0516808	-0.0744316	-0.351631	-0.117821	-0.116341	-0.283765	-0.186061
Agpat3	1.47299	1.36972	0.968214	0.495595	1.12282	0.799938	0.329606	0.161336	-0.415805	-0.164467	-0.547259	-0.785469	-0.647086	-0.168575	-0.104722	-0.578152	-0.526767	-0.425582	-0.134442	-0.345552	0.132949
Pex11g	1.46297	0.625637	0.296319	0.0397227	0.969687	1.21656	0.734488	0.936646	-0.339116	-0.138557	-0.319057	-0.483975	-0.428666	-0.670227	-0.580694	-0.504482	-0.531227	-0.562907	-0.469256	-0.571706	-0.582789
Smim1	1.45735	0.755467	1.12511	0.864199	0.123694	0.433449	1.18167	0.363911	-0.0906001	0.121918	-0.770121	-0.585362	-0.540205	-0.914926	-0.69701	-0.74263	-0.714325	-0.328251	-0.347286	-1.16638	-0.992467
Tmem258	1.44996	1.02193	0.648323	0.586832	0.170499	0.433994	1.00387	0.602951	0.31424	0.0956344	-0.358603	-0.680255	-0.858377	-0.94832	-0.447032	-0.15715	-0.739533	-0.0602376	0.00938845	-1.33131	-0.878085
Hoxd8	1.44345	1.09457	0.572609	0.106691	1.14504	0.569277	0.764318	0.652739	0.0632952	0.378549	-0.929435	-0.399511	-0.341231	-0.828169	-0.592581	-0.675372	-0.732293	-0.656704	-0.480988	-0.593363	-0.939256
Qtrt1	1.43859	-0.418667	-0.13319	0.270568	-0.0199021	0.40267	-0.121543	-0.190404	-0.131324	-0.253226	0.39031	-0.355598	-0.216265	0.501984	0.201466	0.0937008	-0.0920841	-0.391114	0.325789	-0.334215	-0.13441
St8sia6	1.43645	0.297554	0.0208051	-0.0220336	-0.0456397	0.15341	-0.0230683	0.0076841	-0.0261352	-0.17057	-0.315454	-0.237795	-0.0894341	-0.0321282	-0.0303036	-0.11694	-0.21927	0.0105258	-0.0264344	-0.0819876	0.276811
Syt12	1.42707	0.302653	0.544841	0.105378	-0.0519439	0.377672	0.0106513	-0.0656065	-0.199242	-0.607077	0.732966	0.137163	-0.0680354	-0.230412	-0.156575	-0.228324	-0.624034	-0.253671	-0.254474	-0.402499	-0.375885
Chka	1.41694	0.721666	0.689171	0.567958	1.155	0.802405	0.935008	0.398648	0.67277	0.57541	0.30506	-0.331434	-0.749723	-0.64002	-0.658147	-0.708804	-1.14606	-1.52528	-1.02362	-1.37476	-1.34919
Atp6v1d	1.41325	-0.0959231	0.587628	0.0584186	1.20185	0.426437	0.544601	0.716051	0.814701	1.34977	-0.861203	-0.79264	-0.422432	-0.737379	-1.14552	-0.700538	-0.752322	-0.276078	0.246828	-0.808155	0.407652
Slc16a10	1.4114	0.735299	-0.898452	-1.57258	-1.13875	-1.45389	-0.701685	-0.572675	0.127041	0.887225	0.608949	-0.514288	-0.29776	0.134307	0.995518	0.49238	0.184579	-0.635386	-0.390267	-0.130078	0.0972549
Pvrl4	1.39994	0.253142	0.190075	0.146668	0.230684	1.1295	0.510684	0.335249	0.260926	0.12166	-0.33594	-0.429684	-0.374982	-0.407551	-0.301642	-0.376238	-0.391171	-0.468803	-0.478709	-0.491647	0.0938474
Ggct	1.39617	-0.0627349	0.722377	1.19651	0.556354	0.417555	0.0445912	-0.0884588	-0.130008	-0.563031	-0.368515	-0.447336	-0.473085	-0.149313	0.435536	-0.139192	-0.206132	-0.464865	-0.166247	-0.190836	-0.326928
Sec31a	1.39329	0.149992	0.554378	0.306997	0.956547	0.153891	0.0747556	0.0275331	-0.274248	-0.11296	-0.17455	-0.712789	-0.34787	0.540169	0.47285	0.166441	-0.00699766	-0.334832	0.13594	-0.501518	-0.722886
Zfp692	1.39131	0.90926	0.0105596	0.211286	-0.0914038	0.178866	0.443078	0.150446	0.0495598	0.0574791	-0.0245576	-0.278666	-0.253203	-0.33225	-0.266821	-0.0285199	-0.435459	-0.151702	-0.20067	-0.306061	-0.0882934
Paxbp1	1.38683	0.650168	0.491249	0.14285	0.401883	0.323967	0.379049	0.18351	0.506964	-0.00471307	-0.357509	-0.302686	-0.344839	-0.331339	-0.223882	-0.102777	-0.318904	-0.777912	-0.0170692	-0.190076	0.0950956
Pdxdc1	1.38534	0.934616	1.27882	0.885823	1.25196	0.994738	0.557972	0.296827	-0.16896	-0.268429	-0.183542	-0.622362	-0.504757	-0.0696373	-0.338174	-0.672985	-0.805397	-0.344602	-0.0629179	-0.603916	-0.959602
Armcx2	1.38479	-0.00207113	-0.535396	-0.594457	-0.503639	-0.62622	-0.789567	-0.697047	-0.304226	-0.0494054	-0.00992969	-0.339105	-0.181293	0.176018	0.277691	0.118247	0.38314	0.200917	0.946221	-0.0558598	-0.445767
Tigd2	1.38206	-0.212092	0.0516615	0.425489	0.405323	-0.178377	0.448669	0.122276	0.243943	0.156504	0.261186	-0.320821	-0.28152	-0.105298	-0.324885	-0.208314	-0.162558	-0.544778	-0.3081	-0.240196	0.0267223
Gstt3	1.37898	0.103655	1.09877	0.646188	1.08881	0.900944	0.703343	0.694046	0.284904	-0.0226662	-0.340028	-0.604968	-0.512885	-0.45107	-0.477277	-0.352672	-0.514712	-0.597697	-0.543203	-0.63305	-0.581453
Plk3	1.37051	0.340413	0.337057	0.245685	0.626443	0.33382	-0.00880956	-0.274763	0.193851	-0.449207	-0.0560119	-0.171214	-0.225842	0.720723	0.00352744	-0.218645	-0.196549	-0.88027	-0.662302	-0.0353229	-0.444851
Gns	1.36801	0.138022	0.0982177	-0.459988	1.34003	0.694387	0.356305	-0.0622767	0.133032	0.752016	0.248795	-0.88997	-0.794187	0.189423	0.156572	0.583719	-0.465341	-0.496093	-0.0291038	-0.526337	0.465974
Rcn1	1.35528	0.263369	0.729784	0.0418505	1.25743	1.08223	0.321302	0.352652	-0.163894	0.0632139	-0.363771	-0.789909	-0.774331	0.25371	0.765537	0.352104	-0.289915	-1.32959	-0.816392	-1.10698	-1.90896
Chchd7	1.35515	0.747051	1.04238	1.06321	0.6232	0.630362	0.326914	0.0270625	0.0919413	-0.254042	-0.344272	-0.70757	-0.568871	-0.29488	-0.204124	-0.221735	-0.34081	0.248621	-0.493513	-0.710568	-0.273476
Vps18	1.35426	0.150952	0.205671	0.0313715	1.06623	0.782343	-0.0413187	0.210134	0.268297	0.0486251	-0.332024	-0.380086	-0.288875	-0.174681	0.0145776	-0.360454	-0.384666	-0.153555	0.291787	-0.184396	0.397098
Spata3	1.3542	0.844736	-0.0194652	-0.0014927	0.00839819	-0.00122944	-0.000217851	0	0	-0.132198	-0.112631	-0.25802	-0.13014	-0.00659833	-0.00375855	-0.139741	-0.241551	4.4283e-18	-0.00219054	-0.14971	-0.0481548
Oxtr	1.35217	0.404662	0.280194	-0.0368903	0.386185	-0.0350923	-0.0290427	-0.0233243	-0.0218297	-0.189251	-0.207174	-0.228736	-0.115109	0.11801	0.0488747	-0.0845265	-0.204125	0.00655863	-0.0265147	-0.127369	-0.0657185
Timm8b	1.35208	0.561461	1.07159	0.357142	0.887915	0.0380159	1.23219	0.682015	0.636706	0.817124	-0.505054	-0.877365	-0.400752	-1.73789	-1.43534	-1.08437	-1.10963	0.904297	0.158627	-1.35995	-0.932376
Ssbp4	1.35132	0.312712	-0.070674	0.339122	0.443679	0.0841707	0.0232026	-0.120163	-0.251604	-0.00411462	-0.695487	-0.718868	-0.484793	-0.365649	0.0208365	0.293762	0.038491	0.186511	0.607624	0.326048	-0.215634
Golga4	1.33858	0.65862	0.822716	-0.0480357	0.64517	0.072764	0.512544	0.244575	-0.192788	0.372236	-0.175648	-0.353996	-0.349391	-0.783676	-0.580491	-0.422127	-0.323038	-0.557922	0.104421	-0.513133	-0.495117
Rnf181	1.33708	0.609609	0.843061	0.408631	0.628839	-0.0330571	0.920962	0.592716	0.264659	0.871984	-0.215784	-0.722519	-0.299331	-0.838304	-0.644401	-0.465384	-0.713056	-0.601885	-0.283647	-0.59319	-0.36203
Aldoc	1.33398	0.180152	0.800422	0.335616	0.0720516	0.521393	0.100709	0.150015	-0.127293	-0.198203	-0.476263	-0.33124	-0.258142	-0.146359	-0.152666	-0.204341	-0.271432	-0.0576342	0.0610181	-0.305557	-0.220231
Fut4	1.3279	-0.12923	-0.0252805	0.0834027	0.145323	0.811168	0.0362715	0.0196382	0.389345	-0.303456	-0.298593	-0.220066	-0.0960538	-0.0813	-0.0809626	-0.0571424	-0.268401	-0.12613	-0.119267	-0.0626385	-0.0422245
Gm266	1.32594	0.453707	0.219219	-0.0153078	0.0763585	0.054709	-0.0302414	-0.0245138	-0.0229362	-0.191166	-0.239427	-0.221682	-0.0722424	-0.0308855	0.0752741	0.026089	-0.258102	-0.0221782	-0.0240904	-0.175072	0.153494
Hyou1	1.32509	0.908632	0.521358	-0.143659	1.25586	0.944441	0.0759959	0.0254222	0.321634	-0.415447	-0.41138	-0.464426	-0.311168	-0.0949687	0.0682372	-0.324957	-0.296681	-0.362344	-0.00784196	-0.40407	-0.31927
Phf6	1.31807	0.469369	-0.0942157	-0.149094	-0.21779	-0.0288452	0.714526	0.321449	-0.00184642	0.0400589	-0.162527	-0.373155	-0.328895	-0.261869	-0.37832	0.174014	-0.222519	-0.468497	-0.0194119	-0.528946	-0.201948
Nme1	1.31102	0.292488	1.013	0.809854	0.355867	-0.0780036	0.49008	0.827253	-0.337256	-0.0984654	-0.375083	0.143863	0.141143	0.229455	-0.334138	-0.89451	-0.977593	-0.688344	-1.02611	-0.669337	-1.04347
Gkap1	1.30004	0.313737	0.928019	0.494934	0.492734	0.506729	0.354907	0.246571	0.0166682	-0.91615	-0.888232	-0.897161	-0.764348	-0.354382	-0.278282	0.100181	0.326271	0.161037	0.403224	-0.754765	-0.80346
Aktip	1.29653	0.350064	0.910117	0.448365	1.17033	0.679443	0.815172	0.558412	0.0761776	-0.206724	-0.0187428	-0.635364	-0.548919	-0.727708	-0.57889	-0.389618	-0.319531	-0.0396673	-0.351299	-0.751147	-0.659535
Pgd	1.28888	0.218754	-0.123579	-0.260568	0.861849	0.380926	0.325111	0.362447	0.0691353	0.0561325	0.0766896	-0.182321	-0.225125	0.385416	-0.0636662	0.0604037	-0.473711	-0.632263	0.145447	-0.483708	-0.306084
Golt1a	1.28875	0.483767	0.871092	1.01885	0.842557	0.729309	0.879501	0.590161	0.923598	-0.242742	-0.27342	-0.539138	-0.524591	-0.596397	-0.619061	-0.443076	-0.553894	-0.612551	-0.598063	-0.58401	-0.462119
Mknk2	1.2875	0.628119	0.465392	0.306337	0.95413	0.921967	-0.386594	-0.418884	-1.18676	-0.0824474	-0.0883212	-0.506175	-0.348762	-0.0838962	0.629735	-0.267683	-0.165576	-0.460358	-0.0588316	-0.5864	0.180793
Exosc6	1.2855	-0.437246	-0.176232	-0.178178	-0.116311	0.0102664	-0.404959	-0.248646	-0.207515	-0.321992	-0.282107	0.410954	0.206426	0.717393	0.156745	-0.183261	-0.477861	-0.371239	-0.720217	0.136862	-0.156679
Cdo1	1.28438	-0.0612812	0.453305	0.656301	-0.566189	0.333183	0.495774	0.235477	-0.0596611	-0.673318	-0.324968	1.18136	0.770201	-1.06374	-0.339176	-1.44372	-2.40998	-1.37267	-1.41064	-1.38146	-1.59498
Pycrl	1.28085	-0.152543	0.296164	0.0529625	0.331103	-0.0521827	0.34055	0.71498	-0.0924449	0.00232346	-0.202926	-0.241757	-0.212066	-0.140796	-0.217182	-0.362581	-0.230813	-0.455077	-0.116761	-0.259033	-0.492721
Qdpr	1.27449	0.364852	0.760075	0.379565	0.50504	0.114554	0.547542	0.599993	0.77423	-0.174695	-0.0326366	-0.462116	-0.287855	-0.42214	-0.197458	-0.500092	-0.34572	-0.406702	-0.336492	-0.0614825	-0.431575
Ptpn22	1.27305	-0.34111	1.09973	0.280482	0.890169	1.01028	0.270161	0.296948	0.426327	-0.342658	-0.32168	-0.482846	-0.436042	-0.352673	-0.331202	-0.569246	-0.615559	-0.364589	-0.305175	0.520863	0.137467
Ucp2	1.26821	-0.565213	-1.03559	-0.605703	-1.72938	-0.686092	0.610702	0.323985	0.551067	0.331275	-0.593525	-0.00501555	0.148841	-0.726889	-0.0663592	-0.403628	-0.180113	-1.43374	-1.28026	-0.240167	1.23575
Rasa1	1.26349	-0.0996843	0.291871	-0.414733	0.634938	-0.121414	0.00604117	-0.290917	-0.546788	-0.242087	0.151917	-0.160397	-0.210902	0.0136094	0.174593	0.19678	-0.230733	-0.00128156	0.439495	0.0922486	-0.533381
Map3k1	1.26184	0.777866	0.60444	-0.27016	1.09993	0.125525	0.507215	0.1363	-0.0223724	0.700246	0.263297	-0.160863	-0.0620288	-0.818643	-0.82064	-1.01709	-0.962305	-0.584908	-0.224747	0.0748772	0.208327
1700019D03Rik	1.25672	-0.0474811	0.0659532	0.16851	0.212775	0.212298	0.27685	0.0872803	0.264102	-0.0839429	-0.307878	-0.226492	-0.192121	0.0323247	-0.0718997	-0.136312	-0.264429	-0.161444	-0.0449036	-0.236165	-0.0497431
Mospd2	1.2565	0.486708	0.485534	0.158501	1.0732	0.303538	0.118214	0.364279	0.260669	-0.0707634	0.607259	-0.167718	-0.0980513	-0.52386	-0.167914	-0.433258	-0.674478	-0.456963	-0.43412	0.291545	-0.0456217
Rhbdd3	1.25407	0.902743	0.631395	0.330935	0.333714	0.39695	0.185893	0.0579761	-0.216709	-0.230957	-0.171574	-0.305266	-0.225168	-0.180795	-0.133974	-0.180665	-0.415743	0.0667073	-0.132038	-0.342831	-0.123323
Pet100	1.24606	0.788184	0.748068	0.531068	1.16869	1.0505	1.15036	0.968777	0.878987	0.449191	-0.408395	-0.880309	-0.664489	-1.28879	-1.00503	-0.658698	-0.824617	-0.518536	-0.628654	-0.626311	-0.0767287
Faah	1.24477	0.0283607	-0.132684	-0.152408	0.062934	0.145497	0.822271	0.515963	0.219591	0.117536	0.227829	-0.135835	-0.153969	-0.4557	-0.557992	-0.281388	-0.478735	-0.483433	-0.41468	-0.420004	-0.460595
Avpi1	1.23849	0.389102	1.07051	0.675963	0.756716	0.753089	0.199465	0.373066	-0.289016	-0.738235	-0.61171	0.214204	0.353123	-1.06676	-0.373634	-0.75403	-1.18246	-0.939189	-1.01119	0.55599	0.231061
Mrpl53	1.23807	0.583564	0.739735	-0.0585782	1.10296	0.152088	0.937467	0.934497	0.935561	0.169219	-0.715034	-0.656675	-0.498607	-0.813623	-1.11466	-0.57658	-0.58552	0.527445	-0.00495039	-0.740575	-0.861088
Clint1	1.23646	0.575363	0.850705	0.22448	1.08751	0.738192	0.928004	1.02187	0.0519794	-0.181526	-0.154437	-0.2704	-0.137063	-0.830809	-0.656241	-0.172291	-0.678888	-1.07216	-1.4915	-0.905658	-0.884213
Pja1	1.23137	-0.144994	0.43599	-0.00346296	0.306037	-0.600168	-0.417988	-0.218932	-0.547945	-0.669178	-0.867778	-1.02523	-0.592632	0.913711	-0.00942972	0.490309	0.916961	0.150337	0.0754069	-0.55473	-0.995652
Zfp750	1.22812	0.339627	0.354164	0.101085	0.852308	0.502654	0.333517	0.0324308	0.0588411	0.222216	-0.412233	-0.327402	-0.27327	-0.196901	-0.206369	-0.311214	-0.409517	-0.207486	-0.0966491	-0.222615	-0.236059
Pcyt2	1.22799	0.457019	0.30885	0.746791	0.462112	0.704546	0.540342	0.456882	-0.107602	0.276726	-0.18481	-0.462312	-0.339546	-0.567491	-0.369556	-0.243583	-0.461376	-0.562915	-0.535089	-0.30536	-0.190905
Cxxc5	1.22101	-0.0825586	-0.607353	-0.213272	-0.586544	-0.201519	-0.790061	-0.668383	-0.272122	-0.382219	-0.830731	-0.876732	-0.810566	0.801077	0.702656	0.307974	0.763203	-0.0259229	0.54004	0.156849	-0.354768
Dalrd3	1.21756	0.242495	0.370226	0.450241	1.09177	0.752588	0.640954	0.574322	-0.450806	0.0562625	-0.0886865	-0.475587	-0.281171	-0.323877	-0.306153	-0.230472	-0.425554	-0.459013	-0.202669	-0.580699	-0.528868
Nfx1	1.21655	0.12141	0.560356	0.412179	0.357637	0.286966	0.367659	0.456657	0.271605	0.0521176	0.3202	-0.460258	-0.389461	-0.31602	-0.209194	-0.0283606	-0.229281	-0.298343	0.487081	-0.600207	-0.723227
Il20rb	1.21523	0.711836	-0.062952	-0.0289908	0.281671	-0.0311446	-0.0207263	-0.037813	-0.0354427	-0.204796	-0.290592	-0.221978	-0.14663	0.0437391	0.0928548	-0.0410009	-0.171027	-0.0349258	-0.0379067	-0.1274	-0.0850189
Arglu1	1.21506	0.174061	0.463533	0.129488	0.328444	-0.00617886	0.271304	0.0751126	0.216392	-0.176043	0.732937	-0.309544	0.570197	-0.563721	-0.562951	-0.624785	-0.332254	-0.328627	0.326699	-0.118095	-0.167886
Bex4	1.20703	0.935685	1.00395	0.896174	0.0156297	0.654982	0.744315	0.39399	-0.0755429	0.822586	-0.954277	-1.55417	-1.4345	-0.888408	-0.72758	-0.672872	0.0127218	-0.947225	-0.543248	-1.11523	-1.12287
Tsc22d4	1.20233	0.0335653	0.470722	0.404019	0.814536	0.393704	-0.0104262	-0.0840462	-0.545211	-0.02315	0.0955032	0.00788799	-0.209863	-0.797985	-0.167461	-0.458064	-0.538157	0.383153	0.552966	-0.448191	-0.422513
Khk	1.20191	-0.150685	-0.290906	0.155623	-0.477664	0.289006	-0.428355	-0.570379	-0.115603	-0.568839	-0.30566	-0.227214	0.0776959	-0.276387	0.359673	-0.0473765	0.100594	0.729078	0.466095	-0.249357	0.0707125
Sec61g	1.20117	0.431274	0.423566	0.752243	-0.674628	-0.116541	0.864161	0.218014	-0.00312994	-0.513356	-1.71585	-0.201772	-0.3781	-0.388454	-0.414153	-0.633318	-0.0218778	0.427613	-0.69573	-1.10539	-0.724953
Dnajc3	1.19514	1.12193	0.235042	-0.564357	1.15216	1.14555	-0.39833	-0.205671	-0.303498	-0.908807	0.17038	-0.870475	-0.865627	0.644954	0.656258	0.954104	0.0383844	-0.9172	-0.0110026	-0.578596	-0.687313
Mfsd11	1.19373	0.526832	0.708753	0.317273	0.489881	0.740963	0.81573	0.426688	-0.42375	0.0321887	-0.0258317	-0.59092	-0.545516	-0.489564	-0.365494	0.032652	-0.468905	-0.365638	-0.243345	-0.499383	-0.248632
Foxo3	1.19178	0.970254	0.431268	0.293248	0.934829	0.581336	-0.0341009	-0.104914	0.280942	-0.408015	-0.204823	-0.322417	-0.150525	-0.223817	0.111762	-0.113684	-0.390327	-0.210421	-0.180308	-0.202157	-0.253492
Ociad2	1.18444	-0.831197	-0.265614	-0.505177	0.328044	0.00433969	-0.409309	-0.178189	-0.206267	0.425151	0.231109	0.315302	0.163794	-0.914442	-0.0942177	-0.0484535	-0.448136	0.724761	0.944548	-1.42567	-1.4294
Nsmf	1.18344	0.727078	-0.0526048	-0.352679	-0.229878	-0.0223704	-0.0438721	-0.151194	-0.216503	0.369275	-0.17913	-0.187104	-0.0103793	0.0942115	0.154312	-0.265008	-0.340883	-0.0873206	-0.124177	-0.0107539	-0.201951
Lrrc10b	1.17706	-0.22639	-0.0930811	-0.116082	-0.0845616	-0.0842916	-0.196159	-0.186862	-0.175818	-0.19359	-0.253828	-0.188633	-0.107638	-0.131666	0.0404608	-0.157332	-0.0296018	0.594111	0.689361	-0.125534	-0.160379
Cttnbp2	1.17659	-0.175974	-0.086132	0.266339	-0.133884	-0.0662754	-0.149241	-0.224672	-0.211708	-0.249257	-0.239994	-0.165445	-0.036055	-0.225195	0.0927084	0.465228	-0.144254	-0.0997197	0.448741	0.194644	-0.222014
Hap1	1.17512	0.314646	0.435591	0.0876935	0.308826	0.362854	0.333127	0.206908	0.35147	0.130467	-0.356296	-0.291877	-0.128133	-0.140168	-0.128297	-0.274497	-0.320097	-0.276228	-0.194051	-0.233508	-0.26425
Ormdl1	1.17173	0.273579	0.383998	0.0777352	0.763708	0.423994	0.501116	0.236414	0.194397	0.15214	-0.306371	-0.396138	-0.303067	-0.308667	-0.344345	-0.0254498	-0.41115	-0.213851	-0.0293151	-0.185543	0.256319
Mga	1.17163	-0.0174971	0.146831	-0.0924463	0.483071	0.197313	-0.262	-0.249745	-0.491354	0.193013	0.051636	-0.373712	-0.376437	0.142607	0.463372	0.44631	-0.0255725	-0.138872	0.407113	-0.439786	-0.359103
Adcy8	1.1688	0.760191	0.351216	0.0502745	0.915063	0.447357	-0.0202728	0.0116969	-0.0136275	-0.292976	-0.417322	-0.293788	-0.214896	-0.0277686	-0.0260304	-0.256796	-0.340655	-0.00971887	-0.0380462	-0.101149	-0.108898
Fam50a	1.1674	0.191003	1.03358	0.850698	0.65789	0.410319	0.15728	0.482159	0.255438	-0.138251	-0.0751426	-0.520931	-0.227616	-0.291662	-0.161035	-0.387709	-0.283317	0.111399	0.0320137	-0.611355	0.0743471
Lyrm9	1.16669	-0.0930243	0.507939	0.527348	0.0939411	0.242681	1.05705	0.65642	0.451659	-0.117809	-0.358381	-0.55644	-0.391532	-0.649093	-0.645712	-0.375468	-0.247444	-0.339048	-0.348828	-0.333195	-0.597625
Bet1l	1.16624	0.944558	1.03941	0.313621	0.722547	0.900359	0.333319	0.498826	0.911469	-0.684831	0.183629	-0.499355	-0.708844	0.180727	0.22593	-0.190891	-0.385814	-0.787487	-0.321582	-0.677551	-1.11653
Ypel2	1.16513	0.618342	0.39492	0.478505	0.458384	0.177709	0.836313	1.10261	-0.843318	0.440906	-0.762157	-0.698555	-0.546129	-0.809942	-0.591366	-0.389685	-0.35012	-0.646509	-0.336508	-0.0264185	-0.770779
Lnp	1.16263	0.0270249	0.268993	-0.236804	1.10901	0.0438985	0.0885674	-0.0104166	0.120483	-0.153204	-0.04379	-0.421405	-0.236965	0.00294507	0.428093	0.295261	-0.0796769	-0.134164	0.181605	-0.257117	-0.190638
Dnase2a	1.16004	-0.0758818	0.21813	0.144008	0.480982	0.851211	0.482977	0.415381	-0.39049	-0.167871	-0.150438	-0.301527	-0.259119	-0.284404	-0.420372	0.030061	-0.35186	-0.398999	-0.390327	-0.263934	0.566244
Asxl2	1.15104	-0.10977	0.502373	0.0720393	0.596488	0.258211	0.0550716	-0.114258	-0.447303	0.35375	-0.31499	-0.474538	-0.367774	-0.40842	-0.0228528	-0.00150039	-0.201565	0.160628	0.652895	-0.0432598	-0.150212
Atp6v1c1	1.14737	-0.167498	0.369574	-0.20927	1.04576	0.0196349	0.497966	0.195937	-0.115373	0.23225	-0.344612	-0.575939	-0.563164	-0.406191	-0.536001	-0.228922	-0.144305	0.306985	0.478077	-0.328923	0.655587
Sec61b	1.14464	0.363267	0.44435	0.686332	-0.949248	-0.468939	1.06466	0.287481	0.399366	0.00763278	-1.58594	0.310119	-0.0240036	-1.03978	-0.476848	-0.592389	-0.729956	-0.530223	-1.15556	-0.710094	-0.0432033
Wfs1	1.14324	0.843614	0.595835	0.017989	0.767614	0.656935	-0.196498	0.0789594	-0.46625	0.459913	-0.192541	-0.491605	-0.42856	-0.344841	-0.362929	-0.209497	-0.399905	0.477531	0.998769	-0.555073	-0.491672
Eps8l1	1.14119	0.239745	0.459257	0.555577	0.557109	0.633497	0.371834	0.325153	0.634732	-0.219334	0.53186	0.0236977	-0.217515	-0.382965	-0.399306	-0.501021	-0.663897	-0.421769	-0.413508	-0.537865	-0.456631
Ubald1	1.13911	0.18972	0.200996	0.225514	0.380836	-0.141879	0.667437	-0.0783478	0.194434	-0.349115	-0.103393	-0.114298	0.0145044	-0.399967	-0.699257	-0.444366	-0.136852	-0.00568849	0.230384	-0.715664	-0.704892
Hdlbp	1.13793	0.776024	0.677637	0.282553	0.699316	0.648215	0.189074	0.190364	-0.00752592	-0.69975	-0.178686	-0.390716	-0.230129	-0.198218	0.220087	0.0300429	-0.125025	-0.588089	0.0339581	-0.912115	-0.958469
Lpgat1	1.13417	-0.831516	0.371785	-0.0344581	1.03777	0.941956	0.216525	0.0839618	-0.275843	-0.799116	0.47436	0.404109	0.400348	-0.115359	-0.378654	-0.356417	-0.591179	-0.870118	-0.560804	-0.788987	-0.91523
Rasef	1.12716	-0.22257	0.633743	0.165517	0.836795	0.548962	0.414913	0.609108	-0.0806167	-0.243588	-0.143186	-0.14472	-0.17563	-0.347851	-0.320393	-0.34375	-0.418429	-0.359454	-0.352718	-0.363458	-0.216082
Zscan18	1.12011	1.07224	0.35355	0.225539	0.0704764	0.340146	0.192212	0.141264	0.446662	-0.0754237	-0.157877	-0.440929	-0.376139	-0.0150933	-0.0640828	-0.183036	-0.168425	-0.188273	-0.155456	-0.425048	-0.374834
Ccbl1	1.11662	0.144259	0.582501	0.537646	0.791351	0.681818	0.277295	0.0772048	0.317678	-0.221386	-0.112514	-0.266065	-0.216393	-0.125083	-0.116248	-0.181243	-0.371718	-0.265248	-0.259298	-0.288694	-0.274988
Phlda2	1.11489	-0.401426	-0.290651	-0.0386092	-0.280762	-0.205341	-0.0654398	-0.108948	-0.10231	-0.174705	-0.0158655	0.0820261	-0.0709523	0.282626	0.0368449	-0.196529	-0.0941614	-0.0581396	0.0969388	-0.182959	0.0116114
Deb1	1.10967	0.925252	0.964975	0.44374	0.0269001	0.8012	0.698434	0.388265	0.559605	-0.0843076	-0.403693	-0.826218	-0.97167	-1.1083	-0.241059	-0.176283	-0.381657	0.534059	0.510454	-0.758782	-1.19898
Topors	1.10704	1.04608	0.521215	0.472712	0.492066	-0.0342284	0.107751	0.33086	0.612462	-0.1273	-0.516778	-0.812638	-0.565329	-0.0857662	0.0946413	0.348156	-0.00491509	-0.0874055	0.275748	-0.231623	-0.792511
Pafah2	1.10623	0.0643545	-0.0865653	-0.152564	0.0672045	0.208387	0.259337	0.134171	-0.202199	-0.132722	-0.312264	-0.152934	-0.148296	-0.212184	-0.0704959	-0.195801	-0.129211	0.115758	-0.120953	-0.231857	-0.192851
Apex1	1.10197	0.825012	0.742992	0.340014	-0.456188	0.498742	0.455948	0.540128	0.384022	0.241712	-0.0312753	-0.267435	-0.354435	-0.0102426	-0.275523	-0.499436	-0.528147	-0.477711	-0.717915	-0.509102	-0.509154
Peo1	1.09594	0.544834	0.115067	0.36611	-0.0625487	0.117572	0.0520928	0.0165332	-0.131677	-0.116108	0.353231	-0.336294	-0.172443	-0.194559	0.0462982	-0.303466	-0.0909322	0.0677223	0.0191893	-0.130935	-0.200861
Hint2	1.09178	0.589164	0.690735	0.603563	0.155289	0.0174644	1.02161	0.604856	0.391517	0.280447	-0.521261	-0.863958	-0.856716	-1.23632	-1.3414	-0.52533	-0.102359	0.750333	-0.0601105	-0.765499	-0.891479
2310033P09Rik	1.09161	0.855252	0.761935	0.492539	0.676698	0.558701	0.302709	0.841211	0.422594	0.102023	-0.106938	-0.565698	-0.516192	-0.426985	-0.229254	-0.0441648	-0.498713	-0.63489	-0.483376	0.0284297	-0.0440491
Atp6v0d1	1.08721	0.348748	0.630634	-0.0270548	0.519209	0.0538376	0.435838	0.758624	0.030206	0.15856	-0.313159	-0.52581	-0.318354	-0.352393	-0.154876	-0.12527	-0.283034	-0.0330302	-0.0396638	-0.465308	0.128271
Abhd17a	1.08675	-0.0501726	0.675262	0.353608	0.923587	0.770712	0.621573	0.183934	0.152597	0.101526	-0.618072	-0.71661	-0.523935	-0.635049	-0.186586	-0.295366	-0.272818	0.0415685	0.123549	-0.131547	0.0575632
Rreb1	1.0826	-0.205325	0.574389	-0.161228	0.963182	0.43578	0.0482293	0.0607519	-0.123884	0.135793	-0.0966083	-0.398774	-0.255465	-0.401849	-0.239701	-0.159254	-0.30677	0.0760244	0.62646	0.0967123	0.236466
Pip4k2c	1.08135	0.675638	0.414062	-0.516383	0.6816	0.364605	0.393504	0.368827	0.306613	0.734279	-0.404094	-0.293131	-0.441538	-0.355128	-0.174384	-0.392207	-0.476206	-0.343187	-0.206683	-0.5491	-0.605266
Pstpip1	1.08061	0.739571	0.613395	0.141969	0.259613	-0.0462237	-0.0796658	-0.0648387	-0.0608195	-0.166261	-0.326466	-0.349331	-0.284709	-0.0778124	-0.0800771	-0.329787	-0.273046	-0.0754088	-0.0804637	-0.062082	1.01522
Rrbp1	1.07728	0.880438	0.372389	0.0519873	0.682914	0.830366	-0.125896	0.0845264	-0.71206	-1.2286	-0.0221989	-0.772655	-0.698312	0.302845	-0.027074	0.714415	0.0577589	-1.26068	-0.190154	0.0197775	-0.129148
Tspan15	1.07566	-0.265745	-0.0284112	0.122884	-0.427634	0.726485	0.547728	0.447081	-0.445328	-0.0864005	0.5373	0.0197017	-0.0889881	-0.676031	-0.560965	-0.279843	-0.643553	-0.704907	-0.584466	0.204656	-0.484646
Dhx40	1.0747	0.921312	0.650991	0.137835	0.693809	0.28266	-0.138832	-0.272433	-0.483034	-0.026432	-0.198221	-0.454881	-0.21607	-0.130296	0.244779	-0.112726	-0.0781222	-0.320053	-0.437623	0.0486734	0.353078
Kctd1	1.07413	-0.0527986	-0.0585825	-0.128557	0.133508	-0.145536	-0.156305	-0.230866	-0.310542	-0.0965369	-0.256656	0.222474	0.10054	-0.209945	-0.00456114	0.0473827	-0.192594	-0.0747917	-0.227402	-0.186816	-0.294168
Ppp1ca	1.07141	-0.00810587	0.789358	0.123929	0.202143	0.217963	0.974955	0.808733	0.698465	0.207544	-0.293872	-0.201908	-0.217211	-0.732693	-0.994539	-0.35073	-0.828389	-0.731066	-0.78192	-0.0469652	0.135627
Srp9	1.06933	0.787828	1.02545	0.91117	0.23906	0.052479	0.270797	-0.0144443	0.228385	-0.416834	-0.407474	-0.176735	-0.280543	-0.0892757	-0.122553	-0.241012	-0.285005	-0.206592	-0.527947	-0.43619	-0.916003
Sdccag3	1.06262	-0.204797	0.460333	0.214665	0.344849	0.114049	0.122591	-0.118063	0.195859	0.0598304	0.179882	-0.0315395	-0.175655	0.00615126	-0.228661	-0.00998836	-0.418532	-0.268986	0.0927196	0.049084	-0.0363223
Hoxd9	1.06143	0.197675	0.205737	-0.308255	0.325393	-0.372888	0.209203	0.333122	-0.267798	-0.226328	-0.334479	-0.353576	-0.391097	-0.34759	0.12297	-0.0487425	0.354041	-0.262636	0.00241784	-0.337926	-0.709312
Ero1lb	1.05882	0.458559	0.185623	-0.180632	0.479768	0.419078	-0.100164	-0.190718	-0.179262	-0.260776	-0.0346274	-0.262818	-0.0677904	0.0598788	-0.170737	0.182512	-0.0996801	0.000478927	0.211432	-0.172832	0.0284941
Rorc	1.05798	0.226072	0.735958	0.282539	0.4513	0.624935	0.358225	0.0660628	-0.259625	0.643124	-0.0909832	-0.279231	-0.0780932	-0.217197	-0.277211	-0.580875	-0.646712	-0.376723	-0.36563	-0.242756	-0.424686
1110065P20Rik	1.05746	0.131965	0.787669	0.912134	0.456781	0.673702	0.715845	0.356069	0.657335	0.243559	-0.340897	-0.667584	-0.42426	-0.814049	-0.246793	-0.415957	-0.289303	-0.030446	-0.347966	-0.814717	-0.931557
Snapc4	1.05599	0.121636	0.561132	-0.130286	0.291072	0.0633592	-0.089991	0.0939692	-0.19027	-0.0107227	-0.216561	-0.242339	-0.120459	-0.0900491	0.0249822	-0.174186	-0.143732	0.0838137	0.233068	-0.0904047	-0.133813
Trim36	1.05523	-0.197394	0.268584	-0.0870645	0.97901	-0.0515979	0.19758	0.207922	-0.206171	-0.258935	-0.216964	-0.242723	-0.0341449	-0.0903799	-0.0935007	-0.12254	-0.121829	-0.0885366	0.235801	-0.239364	0.031265
Ccdc11	1.05485	0.0048183	0.606677	0.401921	0.286741	0.376059	0.159398	0.15406	0.110961	-0.192413	-0.343329	-0.258769	-0.222751	-0.127656	-0.0993576	-0.240926	-0.228887	-0.138228	-0.137021	-0.236059	0.00446689
Ap1m2	1.05234	0.163494	0.712852	0.380619	0.595545	0.43035	0.550684	0.85143	0.279734	0.399466	-0.0905519	-0.361397	-0.273367	-0.476361	-0.421228	-0.383663	-0.563208	-0.542077	-0.390853	-0.412408	-0.213662
Vat1	1.05234	-0.398346	-0.401899	-0.350152	-0.369054	0.305078	0.00410317	-0.00280548	0.364878	0.142501	0.101152	0.0276982	-0.138784	0.4863	0.608166	0.491674	-0.532718	-1.41471	-1.17368	0.38507	0.316347
Srp19	1.05096	0.254288	0.544945	0.236212	0.0119838	0.172853	-0.0112332	0.223089	0.195123	-0.299757	-0.632879	-0.152128	-0.0734647	-0.0890695	0.0656912	0.0246674	-0.0502986	-0.176181	-0.193288	-0.115448	-0.586273
Nhsl1	1.05012	0.703425	-0.0622314	-0.0381863	-0.156227	0.0943292	0.803125	0.468471	0.752593	0.369022	-0.123307	-0.409935	-0.218415	-0.436978	-0.350625	-0.31881	-0.410938	-0.466121	-0.242861	-0.39676	-0.56444
Sh3gl2	1.04939	0.155648	0.289023	-0.175948	-0.112272	-0.325543	-0.322692	-0.218588	-0.248418	0.753777	-0.211274	-0.277299	-0.192204	-0.330793	0.115595	-0.166184	-0.304871	0.697256	0.974795	-0.588515	-0.559198
Arhgap39	1.04904	0.106514	0.0704665	0.236453	0.492635	0.272106	0.23352	0.243217	-0.209481	-0.0420421	-0.33309	-0.214923	-0.181229	-0.112143	-0.0720569	-0.150581	-0.197167	-0.160431	0.00167879	-0.212369	-0.229413
Lpin3	1.0471	-0.135347	0.112541	-0.119047	0.910577	0.0678471	0.0343459	0.0722788	-0.107226	-0.0519753	0.183923	-0.212581	-0.0315961	-0.00408439	0.0543142	0.100454	-0.198494	-0.111161	-0.111119	-0.139268	-0.126875
Mpp2	1.03884	0.260132	0.120301	0.0225025	0.369532	0.150147	-0.0287378	0.00221661	-0.188406	-0.181972	-0.297939	-0.186003	-0.202672	-0.139971	-0.039012	-0.137316	-0.0534163	-0.061373	0.239138	0.0038162	-0.183435
Krtcap2	1.03749	0.804824	0.575535	0.667332	0.663718	0.856065	0.631622	0.372323	0.654253	-0.687759	-0.486259	-0.571338	-0.507637	-0.220573	0.0920692	-0.060081	-0.365654	-0.889037	-0.49824	-0.254564	-0.733786
Lad1	1.03578	-0.345911	0.0758275	-0.00235518	0.0787329	0.237899	0.193925	0.208443	-0.248212	-0.296006	0.0314592	0.608073	0.644285	-0.42266	-0.421245	-0.616004	-0.797311	-0.549176	-0.537189	-0.462132	-0.5825
Runx2	1.03569	-0.305154	-0.163362	-0.168188	-0.155001	-0.159052	-0.0980822	-0.0806551	-0.0756817	-0.141325	-0.316563	-0.193006	-0.175357	0.144067	0.0176082	0.21155	0.116731	-0.0901541	-0.0898619	-0.0466156	0.544215
Uhrf2	1.03531	0.355357	0.688152	0.379659	0.630627	0.56248	0.0592938	-0.0178364	0.110806	-0.382838	0.487414	-0.208975	-0.180545	-0.0116076	0.0466088	0.026104	-0.474118	-0.524367	-0.174732	-0.0545803	0.174351
Adra2c	1.02992	0.0467109	0.157402	0.37123	0.14699	0.459452	-0.0789055	-0.0631326	-0.0592599	-0.191945	-0.283473	-0.179672	-0.152301	-0.0716938	-0.0717562	0.0978058	-0.142152	-0.096987	-0.0928186	-0.109648	-0.116147
Gcc2	1.02931	0.811243	0.807285	0.314726	0.773964	0.582036	0.658989	0.978893	-0.135533	0.127511	0.125362	-0.691578	-0.7133	-0.661892	-0.76473	-0.137064	-0.466624	-0.446672	0.393466	-0.330329	-0.365178
Cnppd1	1.02821	0.163763	0.114389	0.304804	0.916842	0.403001	0.0398224	0.069387	-0.24274	0.0437581	-0.131796	-0.354491	-0.371466	-0.00823057	0.190105	0.0137976	-0.12561	-0.338081	-0.103218	-0.0289865	0.258882
Ado	1.02731	0.45784	0.768129	-0.445697	0.57962	0.113923	0.0396383	0.142333	0.0550527	-0.297064	-0.144032	-0.55239	-0.278791	0.238286	0.695884	0.251748	0.0455305	-0.270489	-0.0440951	-0.384564	-0.395651
Cdk5rap3	1.02332	0.60081	0.624874	0.437662	0.566537	0.85691	0.477572	0.601675	0.619694	-0.0543733	-0.327362	-0.603299	-0.475406	-0.430647	-0.141167	-0.275983	-0.262587	-0.240238	-0.215532	-0.349236	-0.546945
Igsf5	1.02076	0.578273	0.752681	0.263578	0.957411	0.568764	0.898547	0.687421	0.461733	0.158249	-0.110741	-0.484753	-0.388094	-0.650486	-0.533724	-0.391385	-0.543156	-0.626705	-0.451547	-0.389391	-0.564755
Tubb2b	1.02075	0.425152	-0.0348699	-0.0928115	-0.483295	0.469174	0.833089	0.589906	0.819252	-0.220682	-0.0831358	0.247001	0.158525	-0.124598	-0.0361442	-0.72966	-0.756187	-1.4394	-1.2685	-0.981958	-0.933689
Oxr1	1.01915	0.536332	-0.144915	-0.355022	-0.208207	-0.148429	-0.444124	-0.33333	0.0186084	0.635976	0.241066	-0.319283	-0.0043498	-0.163974	0.625964	-0.0422306	-0.162629	-0.229556	0.0447832	0.0374683	-0.344428
Acap1	1.01842	-0.217402	0.482857	0.338282	0.884371	0.0299608	0.00491472	0.0620252	-0.0410048	-0.183751	-0.139507	-0.253247	-0.117621	-0.00227654	-0.0546323	-0.158485	-0.23433	-0.0566085	-0.0591388	0.0627824	-0.114941
F8a	1.01756	0.205664	0.299321	0.14368	0.000483739	0.335146	0.138172	0.0576012	0.0784807	-0.062331	-0.318483	-0.144427	-0.179959	-0.196114	-0.158394	0.0540425	-0.227849	-0.0310465	0.16882	-0.219974	-0.156219
Lars2	1.01661	1.00427	0.538734	0.496431	0.740678	0.220969	0.117314	0.284879	-0.23975	-0.114862	-0.416914	-0.449101	-0.52095	-0.031347	-0.0524899	-0.108574	-0.28725	-0.214475	0.0534477	-0.233837	-0.413089
Yipf2	1.01196	0.919179	0.738312	0.163756	0.946513	0.904006	0.47313	0.727356	0.898087	-0.127051	-0.024097	-0.411091	-0.131424	-0.586535	-0.273598	-0.31968	-0.610262	-0.581995	-0.332981	-0.306797	-0.372528
Slc4a4	1.00474	-0.777854	-0.64229	-0.399667	-0.76313	-0.376828	-0.144445	-0.15571	-0.197514	-0.544732	-0.687066	-0.48745	-0.38405	0.658675	0.228572	0.988096	0.72596	-0.0344118	-0.15587	-0.426022	-0.341224
Ide	1.00107	0.348332	0.41543	0.244098	0.249295	0.21981	0.184815	0.268732	-0.211111	0.065741	-0.264953	-0.336762	-0.244585	-0.302323	-0.100148	0.104652	-0.290195	0.119016	0.364497	-0.102168	-0.411635
Bola2	0.99837	0.707692	0.519021	0.107033	0.198269	0.192586	0.807064	0.466858	0.562569	0.156775	-0.754348	-0.488367	-0.413933	-0.522694	-0.541842	-0.561577	-0.41479	0.0857955	-0.319003	-0.150187	0.214985
2310030G06Rik	0.997944	0.142683	0.909202	0.203073	0.35484	0.230458	0.830915	0.411058	0.360038	0.495267	-0.428459	-0.347959	-0.357166	-0.529685	-0.498286	-0.477789	-0.513748	-0.519026	-0.431519	-0.452523	-0.33355
Trak2	0.997546	-0.577296	0.0993325	-0.210781	0.222226	-0.184952	-0.26252	-0.213467	-0.522947	0.0764574	-0.282529	-0.180311	-0.133153	-0.190739	-0.141437	0.0344487	0.0400245	0.302379	0.523184	0.429791	-0.253647
Ppp6r1	0.992761	0.612778	0.260632	0.478154	0.358351	0.473858	0.0636695	0.190825	-0.177822	0.174548	-0.159967	-0.336076	-0.17052	-0.257375	-0.210572	-0.409823	-0.330762	0.0445484	0.148798	-0.0283856	0.128401
Ncapd3	0.987908	0.0397556	0.47002	0.136018	0.281649	0.403234	0.0153398	-0.119468	0.0339421	-0.108962	-0.141259	-0.291171	-0.208024	-0.200299	-0.108131	0.00170702	-0.112047	-0.0922452	0.257725	-0.00787408	0.0152197
Sars	0.98768	0.431423	0.32471	0.574914	0.641471	0.901388	0.355918	0.873584	0.235337	0.039155	-0.32609	-0.209226	-0.429402	-0.281338	-0.567057	-0.203657	-0.48227	-0.666611	-0.410171	-0.329285	-0.634592
Clk4	0.986669	0.368002	0.481209	-0.0271034	0.400043	0.140781	-0.0406024	-0.133291	0.142883	-0.0172228	-0.154732	-0.455968	-0.452455	0.251932	0.37718	0.326209	-0.0147061	-0.378698	0.00512104	0.0781395	-0.167479
Cdr2	0.984275	-0.171922	0.46443	-0.203475	0.638699	-0.0670033	-0.171282	-0.378733	-0.434647	-0.0934699	-0.374861	-0.109403	0.0900318	0.462384	0.480689	0.0407276	-0.186371	0.137168	0.283372	-0.402175	-0.759203
Scube1	0.980285	0.135054	-0.160694	0.00553145	-0.150219	-0.178406	-0.229207	-0.195527	0.127644	-0.183798	-0.0749405	-0.259936	-0.0900725	-0.0618786	0.729771	0.0309798	0.0942246	-0.183432	-0.185254	-0.232068	-0.184251
Slc15a2	0.979483	0.125822	0.44616	0.510944	0.166073	0.649817	0.221282	0.596631	0.0808338	-0.563208	0.719939	-0.585968	-0.550832	-0.254124	-0.0528007	0.5328	-0.0370904	-0.63326	-0.247914	-0.603357	0.491488
Tmem53	0.979332	0.427109	0.56096	0.0907523	0.270717	-0.0829151	0.0790563	0.115883	0.525828	-0.0309397	0.167123	-0.27227	-0.264839	0.105297	-0.0399067	0.00871988	-0.235176	0.0141604	-0.0659544	-0.28932	-0.213597
Nktr	0.978262	0.955545	0.496294	0.401963	0.765422	0.792242	0.0316416	0.0252394	-0.232685	-0.536928	0.398762	-0.261738	-0.421714	-0.31172	0.0601166	0.000315223	-0.220055	-0.991866	0.000331546	-0.674028	-0.473505
Larp4b	0.975381	-0.0248073	0.148236	-0.281211	0.733272	0.135455	0.0529839	-0.158972	-0.665778	0.460835	0.658142	-0.159126	0.0944015	-0.386222	-0.246442	-0.367385	-0.448922	-0.155757	0.534654	-0.108363	0.279538
Pisd	0.972789	0.63402	0.147688	-0.537961	0.562582	-0.13304	0.000762754	-0.016361	0.0191792	0.503957	-0.0805409	-0.272918	-0.107758	0.175318	0.00989738	-0.0619523	-0.33658	-0.22897	-0.0811009	0.199817	-0.0750423
Zfp697	0.970235	0.046378	0.553346	-0.114657	0.663228	0.181231	0.118686	0.0273449	-0.184153	-0.0879641	-0.217799	-0.206026	-0.150032	-0.0445645	0.0735988	-0.151826	-0.202164	-0.16734	-0.210593	-0.0646584	-0.223821
Ankrd12	0.970187	-0.724721	-0.560545	-0.429152	0.206805	-0.619718	-0.683131	-0.60374	-0.215244	-0.147661	0.166914	-0.489059	-0.54515	0.214526	0.599723	0.752737	0.651226	-0.00613303	0.934433	-0.613405	-0.0623359
Plekhm2	0.969323	0.192892	0.494503	-0.237344	0.420604	-0.133412	-0.452265	-0.463184	-0.450797	-0.0517456	-0.0835475	-0.241716	-0.329137	0.182155	0.388444	0.339882	-0.0233312	0.160762	0.508386	-0.102547	0.192316
Nabp1	0.967284	0.315142	0.272126	0.363385	0.705469	0.660866	0.795448	0.108184	0.13847	-1.04588	0.77871	0.0361613	0.0741641	-0.270882	-0.784238	-0.370108	-0.552211	-1.24647	-0.9432	-0.494437	0.357726
1810043H04Rik	0.966039	0.58089	0.39397	0.554899	-0.111208	0.169777	0.626085	0.475711	-0.20479	-0.147415	-0.626864	-0.481748	-0.418675	-0.620505	-0.555465	-0.489765	-0.235194	0.569555	0.200417	-0.414031	-0.209939
Polr2l	0.965417	0.916077	0.694726	0.870098	0.375553	0.36163	0.766001	0.279615	-0.0352616	-0.489296	-0.576202	-0.598327	-0.190691	-0.746049	-0.613951	-0.468407	-0.0606061	-0.0945359	-0.10705	-0.354647	-1.37388
Hsbp1l1	0.958433	0.186714	-0.186223	-0.0118861	0.215133	-0.0977278	0.152546	0.15931	-0.198385	0.323803	-0.210766	-0.163448	-0.0857744	0.135449	-0.136888	-0.23266	-0.213391	-0.0492021	-0.0249987	-0.166526	-0.211369
Nt5dc2	0.953997	-0.261755	-0.209887	-0.206954	0.453035	-0.24278	-0.408199	-0.295357	-0.0592751	-0.279542	-0.243828	-0.426596	-0.315675	0.0770436	0.592614	0.605032	0.357137	-0.225425	-0.0609038	0.0444011	0.00886103
Caskin2	0.951018	0.0576547	0.0191481	-0.268101	0.718397	0.294155	-0.0783218	-0.0242463	0.0194008	-0.0112058	0.188326	-0.138595	-0.0368448	-0.279891	-0.280197	-0.393624	-0.245405	0.0390094	0.43156	0.461511	-0.35364
Mgat4b	0.94744	-0.761666	0.390272	-0.716431	0.87461	-0.316959	-0.309467	-0.32009	-0.360822	0.599129	0.172531	0.237905	0.0653411	-0.403334	0.168782	-0.232556	-0.424012	-0.629013	-0.11328	0.200791	-0.508608
Fah	0.946759	0.220403	-0.0371714	0.0580829	-0.00237751	0.255823	0.0560879	0.175618	-0.273856	-0.119269	-0.270498	-0.086772	-0.0123786	-0.0627747	0.263277	-0.273126	-0.209133	-0.176849	-0.0571449	-0.203341	-0.269491
Srek1	0.94612	0.374877	0.577863	0.353676	0.43841	0.494892	0.556619	0.726714	0.554575	0.0705029	-0.13572	-0.593344	-0.587246	-0.667223	-0.28589	-0.242246	-0.0723681	-0.450889	0.0153332	-0.570768	-0.613998
Gpr89	0.945339	0.835791	0.17854	0.0130433	0.835669	0.669105	0.642197	0.252954	0.268421	0.103453	-0.258804	-0.373376	-0.454051	-0.454314	-0.37104	-0.37913	-0.319124	-0.350069	0.113444	-0.47901	-0.32542
Gne	0.944271	0.710454	0.707517	0.0486831	0.829848	0.430148	0.278854	0.562128	-0.37583	-0.337526	-0.11057	-0.327302	-0.155546	-0.329527	-0.247334	0.00878071	-0.4508	-0.280808	-0.0632915	0.305652	-0.425298
Csnk2b	0.94419	0.0925944	0.258876	-0.300287	-0.11081	-0.276188	0.0798097	0.0364729	0.578267	0.0207053	-0.712438	-0.108116	-0.0349508	-0.212988	0.204998	-0.114285	-0.202994	0.140542	-0.0635685	-0.0272142	-0.143032
Klc3	0.94227	0.0178715	0.0413623	0.0162591	0.00444933	0.328171	0.555101	0.30043	0.117223	-0.0774935	0.00949036	0.107247	0.225785	-0.45598	-0.528492	-0.44431	-0.462577	-0.475777	-0.366936	-0.49057	-0.468754
Lzts2	0.941114	-0.19765	0.100676	-0.634443	0.0909385	0.333569	-0.342692	-0.292867	0.14843	0.404053	-0.123716	-0.476152	-0.261013	0.00481194	0.277078	-0.152043	0.299498	0.107735	0.343277	-0.159783	-0.735657
Pdk2	0.937497	0.844753	0.574376	0.681188	0.449135	0.444082	0.688591	0.31102	0.405221	0.19871	-0.476615	-0.570439	-0.510961	-0.616039	-0.624491	-0.5343	-0.354973	0.209092	-0.0119995	-0.471929	-0.0434799
Dusp28	0.93651	0.317458	0.303537	0.181144	0.21006	0.203134	0.601116	0.398295	0.0608198	-0.0283414	-0.473187	-0.405127	-0.308311	-0.3775	-0.272271	-0.155805	-0.0808727	-0.286428	-0.16308	-0.28955	-0.338872
Csnk1g2	0.933725	0.388144	0.152488	0.151653	0.632998	0.258892	0.171446	-0.0433144	-0.182257	0.219099	-0.56111	-0.269354	0.0727694	-0.0534813	-0.00221887	0.0158964	-0.186898	-0.15985	-0.0228869	-0.383051	-0.457859
Cpeb1	0.928662	-0.05957	0.829727	-0.322546	0.924352	-0.104515	0.0101882	-0.198524	0.325733	0.470949	0.46868	-0.0636919	-0.0114853	-0.144427	0.0425149	-0.331765	-0.453762	-0.282551	-0.120282	-0.418427	-0.403341
Atp7a	0.928436	-0.44132	-0.244356	0.0205843	0.754625	0.825766	-0.24632	-0.377897	-0.0312696	-0.44376	-0.391072	-0.545021	-0.628052	-0.0381823	0.156597	0.628078	0.29722	0.148427	0.53414	-0.111589	0.201498
2810428I15Rik	0.924293	0.561155	0.622651	0.808865	0.601474	0.338403	0.426316	0.561051	0.239239	-0.0374124	-0.379949	-0.745357	-0.650788	-0.672991	-0.375183	-0.26001	-0.187993	0.811797	0.226759	-0.444063	-0.743571
Cox20	0.9197	0.0357158	0.763819	0.836575	0.826324	0.907872	0.426149	0.343013	-0.0696446	0.397921	-0.0513318	-0.755774	-0.525063	-0.616809	-0.236339	-0.276844	-0.498619	0.378283	0.0701706	-0.0954915	-0.526853
Zfp949	0.915801	-0.0858522	0.447289	0.417975	0.0727921	0.128814	0.36347	0.053422	-0.636726	0.00940257	0.296739	-0.199784	-0.246751	-0.0657758	-0.265238	0.206355	-0.223407	-0.369464	-0.183931	-0.137651	-0.330747
Zfp771	0.915318	0.599061	0.505391	0.527893	0.371822	0.518729	0.370617	-0.141423	0.297668	-0.267811	-0.535678	-0.320093	-0.539755	-0.360524	-0.0297605	-0.349585	-0.109183	0.31359	0.160685	-0.565029	-1.09353
Hgfac	0.914221	-0.192009	-0.116893	-0.0574276	-0.108654	0.285599	0.114397	-0.0111842	-0.100549	-0.167827	0.185718	0.0428022	0.0670865	-0.0470746	-0.113508	-0.0230333	-0.24255	-0.111214	-0.109617	-0.171535	-0.122933
Zxdc	0.914156	0.197395	0.0447747	-0.216663	0.389396	-0.116776	0.0554268	0.346881	-0.179151	-0.00515097	-0.180177	-0.180989	0.036454	-0.0631518	-0.00210696	0.137285	-0.140455	-0.317882	0.430436	-0.272106	-0.101074
Zmym5	0.91383	0.64426	0.362763	0.533444	0.710369	0.540248	0.167158	0.132249	-0.0321061	-0.304219	0.506492	-0.189245	-0.101143	-0.346144	0.102757	-0.12359	-0.382384	-0.46726	0.0862697	-0.395596	-0.849853
Mllt4	0.907394	0.77279	0.451998	0.281189	0.528715	0.216293	0.189299	0.0448347	0.129137	0.0623709	0.616363	-0.0522123	-0.133966	-0.695508	-0.247634	-0.47579	-0.62596	-0.600133	-0.539965	0.602242	-0.453324
Tsc1	0.907159	0.506498	0.311233	0.129478	0.88058	0.431151	0.0380859	0.126634	-0.215758	-0.0438304	-0.319104	-0.279799	-0.118076	-0.0234544	-0.184532	-0.31223	-0.227043	-0.0407642	0.0599218	-0.00347209	-0.283612
BC037034	0.90694	0.760292	-0.0979947	-0.200012	-0.242954	0.0233259	0.072923	0.217917	0.154185	-0.0499687	-0.152503	-0.176353	0.0032466	-0.0660664	-0.0254746	-0.180111	-0.115879	-0.105747	-0.0969169	-0.13043	-0.198107
Clpp	0.906259	0.628906	0.368476	-0.0236542	0.902208	0.75045	0.509781	0.698013	0.453675	-0.0476548	-0.273786	-0.569174	-0.414303	-0.420859	-0.189478	-0.166901	-0.216556	-0.120469	-0.0340174	-0.405109	-0.771062
Nol12	0.903438	0.415118	0.205704	-0.0817147	-0.150719	0.348206	0.327882	0.490041	-0.0794459	-0.210721	-0.239645	-0.0107038	0.172853	-0.193193	0.107731	-0.218423	-0.376059	-0.693744	-0.729672	-0.115264	-0.400704
A230046K03Rik	0.902497	-0.0816026	0.307654	-0.0110883	0.865314	0.433299	-0.170496	-0.0865791	0.292093	0.115895	0.281303	-0.284633	-0.150317	-0.199771	0.152512	-0.121915	-0.250179	0.00146938	0.601751	-0.40152	0.597022
Tor4a	0.901782	0.256793	0.415628	0.643504	0.321265	0.484073	0.0971348	0.077931	0.0285121	-0.111979	0.0906388	-0.283208	-0.161475	-0.245545	-0.0647607	-0.186685	-0.315638	-0.286637	-0.0275866	-0.0118293	0.136046
Lpin1	0.899999	-0.243706	0.27635	0.167819	0.104969	0.578909	0.53048	-0.0851381	-0.558647	0.604038	-0.110051	-0.316213	-0.38411	-0.250287	-0.330138	-0.431989	-0.395341	-0.137465	-0.114268	0.0884656	-0.371595
Wdr81	0.899813	-0.104023	0.0383444	0.0937099	0.0977541	0.278429	0.0658599	-0.0417103	-0.0898704	0.0960408	-0.208817	-0.154294	-0.130225	-0.0493843	-0.0584493	-0.140526	-0.197312	-0.085559	0.155669	-0.12655	0.22104
Gtf2ird1	0.895193	-0.0427807	-0.0548275	-0.556802	0.305978	-0.289941	-0.104897	0.0824603	-0.249718	0.512967	0.374176	-0.181222	-0.0862564	-0.111648	0.0419063	0.0752933	-0.146543	0.00727645	0.0614196	-0.116973	-0.376452
Esco1	0.893824	-0.139868	0.394639	0.0837721	0.163976	0.214549	0.0233867	-0.0337301	0.37636	0.126175	-0.0884658	-0.0517599	-0.0811936	0.1091	0.053609	0.0913303	-0.237004	-0.425919	-0.156291	-0.152219	-0.17683
Abhd17c	0.891854	-0.115482	0.173272	-0.149694	0.0777996	0.144502	-0.0536131	0.086396	-0.113269	0.149898	0.145008	-0.0673712	0.0888084	-0.127273	0.274398	-0.125311	-0.282863	-0.364227	-0.181323	0.109631	-0.314646
Llph	0.889709	0.477768	0.145085	-0.147726	-0.231689	-0.226958	0.38056	0.277385	0.360931	0.163151	-0.156661	0.29778	0.24356	-0.310082	-0.322967	-1.17135	-0.626671	-0.22843	-0.704222	-0.236013	-0.365363
Rsrp1	0.885619	-0.301269	0.0734989	-0.443068	-0.1939	-0.412494	-0.210727	-0.444558	0.209377	0.0938269	0.0389669	-0.543429	-0.520125	-0.152054	0.316419	-0.16788	0.779826	-0.463236	0.556805	-0.514159	-1.40956
Ift20	0.885335	0.185462	0.369398	0.373337	0.245105	0.178505	0.55277	0.49669	0.0659153	-0.628943	-0.290051	-0.733105	-0.790859	-0.268524	-0.0617735	0.353639	0.281919	0.243515	-0.064532	-0.586998	-0.818851
Fam63b	0.885207	-0.253819	-0.428973	-0.605526	0.241086	-0.0982344	-0.173992	-0.363415	-0.893885	0.752	0.356221	0.188091	0.208258	-0.222246	0.2378	0.112235	-0.370165	-0.984222	-0.455466	0.206047	-0.771234
Rhbg	0.883598	0.854326	0.115169	0.0616329	0.175384	0.189208	0.341675	0.666986	-0.0123878	0.502239	-0.00395096	-0.221785	-0.168447	-0.302481	-0.315904	-0.366838	-0.482559	-0.302055	-0.29804	-0.305434	-0.317421
Tsta3	0.881757	0.731891	0.78585	0.672214	0.730787	0.607679	0.744916	0.622259	0.504933	0.148876	-0.0645813	-0.289674	-0.441827	-0.768823	-0.78998	-0.334582	-0.672159	-0.459911	-0.381893	-0.341484	-0.547512
Map7	0.877276	0.260452	0.144622	-0.359547	0.218696	-0.178733	0.2069	0.358711	0.101098	0.252486	0.524021	0.341652	0.317277	-0.284326	-0.388644	-0.390888	-0.691649	-0.604416	-0.569035	-0.62574	-0.603777
Rps19bp1	0.873411	0.113498	0.33201	0.130166	0.401556	0.078887	0.752108	0.793816	0.351759	-0.113049	-0.490061	-0.110472	0.145465	-0.660767	-0.570922	-0.25407	-0.478801	-0.447292	-0.369268	-0.334706	-0.57202
Sec23b	0.871298	0.196307	0.836456	0.447345	0.360905	-0.0335146	0.011246	0.254391	-0.244366	0.0338727	-0.14742	-0.139338	0.0458141	0.013017	-0.191461	-0.355824	-0.214662	-0.455243	-0.311595	-0.00779815	-0.274994
Tbcc	0.870145	0.0536032	0.466435	0.111843	0.134464	0.0981943	-0.201267	0.112008	0.130117	-0.143934	-0.461453	-0.246489	-0.280565	0.364405	0.36603	-0.0935129	-0.0143213	-0.334096	-0.161847	0.349186	-0.593981
Exosc4	0.869152	0.399139	0.781725	0.474628	0.867846	0.598148	0.855763	0.727359	0.62238	0.089527	-0.249737	-0.48675	-0.476918	-0.722667	-0.583203	-0.387535	-0.515055	-0.352943	-0.0513613	-0.571885	-0.431478
Gcnt4	0.867478	-0.142767	0.0221091	0.0961226	-0.0220361	0.186218	0.146064	-0.0336841	0.0177711	-0.148951	-0.179791	-0.075648	-0.0902566	-0.176138	0.244195	-0.113829	-0.156824	-0.112056	-0.0940377	-0.187942	-0.142073
Rab11fip4	0.867222	0.0366545	-0.0041963	-0.0525362	0.242278	0.235412	0.0817151	-0.00701187	-0.0571091	0.00865869	-0.0819588	-0.117659	-0.111914	-0.0630798	-0.0644966	-0.110509	-0.143895	-0.0693699	0.0103562	-0.133225	0.103471
Tufm	0.866934	0.172168	0.488999	0.0112008	0.436352	0.356744	0.33852	0.697405	-0.0113854	0.134671	-0.0430436	-0.302702	-0.16022	-0.278887	-0.33841	-0.229405	-0.292093	-0.106313	-0.00241388	-0.257872	-0.400065
Osbpl2	0.865955	0.669474	0.442973	0.337662	0.826555	0.390804	0.556555	0.607892	0.0328925	0.52895	-0.56035	-0.46029	-0.494351	-0.493881	-0.303552	-0.333447	-0.398251	-0.409875	-0.138983	-0.361553	-0.579037
Slc25a44	0.86357	0.302423	0.284596	0.283331	0.235841	-0.106612	0.103273	-0.149058	-0.344456	0.148545	-0.310786	-0.178588	-0.171239	-0.0797395	0.0281386	-0.228678	-0.230928	-0.0733709	0.365447	-0.0501325	-0.0466873
Pde4a	0.863459	0.590715	-0.221531	-0.337316	-0.280715	-0.201845	-0.228946	-0.115301	-0.27484	-0.0976363	-0.371955	-0.333033	-0.308724	-0.240103	0.161953	0.400427	0.316829	-0.0292086	0.148134	0.0137408	-0.0752191
Stxbp2	0.861353	0.330041	0.856672	0.177075	0.687251	0.58657	0.197762	0.586084	-0.278014	0.58296	-0.0122497	-0.195255	-0.15197	-0.458351	-0.355474	-0.561399	-0.644736	-0.49602	-0.426924	-0.3924	0.139401
Pcsk7	0.857265	0.218413	0.374596	-0.108425	0.736149	0.519388	0.113147	-0.202827	-0.57573	-0.0994862	0.391045	-0.193134	-0.41539	-0.230482	-0.13315	0.0583814	-0.196779	-0.110424	0.378584	-0.020274	-0.290587
Tmem139	0.855785	0.278339	0.00987339	-0.0248282	0.749127	0.139618	0.301556	0.303481	-0.169325	-0.0699746	-0.151417	-0.183467	-0.134504	-0.065913	-0.187342	-0.0406208	-0.21121	-0.163605	-0.16521	-0.213103	-0.164676
Csnk1e	0.855757	-0.528754	-0.758529	-1.03641	-0.91817	-0.713262	-0.152353	-0.320968	0.449378	0.154939	-0.172975	0.240265	0.47504	-0.114001	0.521736	0.00355234	-0.195196	-0.514248	-0.0760177	0.230468	-0.338236
Slc25a1	0.85543	-0.00421739	0.225051	0.439689	0.210698	0.417989	0.542223	0.234876	0.160873	0.746244	-0.483437	-0.382247	-0.341661	-0.434936	-0.077668	-0.486711	-0.417835	-0.451863	-0.535857	-0.10226	-0.257229
Zfp263	0.853792	0.676257	0.428362	0.197536	0.618769	-0.00950046	0.256913	0.100208	0.159015	-0.285724	0.366873	-0.388245	-0.184445	0.0819087	-0.101888	-0.202712	-0.183229	-0.391969	-0.0101745	-0.115796	0.589413
Yars	0.848774	-0.145516	-0.0587843	-0.101048	0.167889	0.253744	-0.343099	0.271885	0.251371	-0.338562	0.131186	-0.00392916	0.112365	0.144059	0.143699	-0.221794	-0.00270966	-0.324103	0.441732	-0.186532	-0.416013
Dpy19l4	0.847775	0.371295	0.372367	-0.0434348	0.143019	0.280031	0.195266	0.336817	-0.293782	-0.0441452	0.18144	-0.209171	-0.221523	-0.194552	-0.14956	-0.119541	-0.17175	-0.111694	-0.0141547	-0.2022	-0.328891
Tmem259	0.847019	0.345105	0.31624	0.536822	0.832608	0.565434	0.0598118	0.163632	0.147939	0.140854	-0.295218	-0.424642	-0.39123	-0.127244	-0.0222465	0.130793	-0.17889	-0.0865494	0.0996606	-0.0924023	-0.431822
Actr1b	0.845128	-0.388199	0.00878407	-0.114249	0.323766	0.0647132	0.107296	-0.0987294	-0.432248	-0.0722976	-0.102222	-0.437428	-0.3843	-0.380778	-0.0282938	0.0516327	0.23074	0.302361	0.676569	-0.155395	-0.0196037
Abracl	0.842352	-0.378103	0.205392	-0.00753784	-0.330748	0.0864365	0.0873179	-0.343684	-0.374134	0.181201	-0.898929	-0.042852	0.0942856	-0.134733	-0.0631365	-0.658823	-0.214605	0.639745	0.509257	-1.1383	0.833276
Gcat	0.841137	0.402626	0.462197	0.131863	0.48127	0.657904	0.200758	0.156965	0.275384	-0.211448	-0.281496	-0.213825	-0.232283	-0.228234	-0.282479	-0.188443	-0.270613	0.1686	0.268413	-0.364472	-0.234781
Emc9	0.840466	0.335201	0.584154	0.15925	0.817293	0.323867	0.402423	0.574056	0.115639	0.0729987	-0.232743	-0.358941	-0.281325	-0.362612	-0.0634179	-0.16022	-0.289082	-0.195758	-0.44751	-0.317115	0.00666414
Sqrdl	0.839584	-0.152664	0.611244	0.275013	0.541406	0.0437327	-0.352871	-0.178152	0.0421583	-0.287021	-0.437998	-0.355753	-0.360324	-0.283624	0.250452	-0.125918	0.104127	0.40382	0.554465	0.0444681	0.0731671
Slc16a11	0.83957	0.468123	-0.0380782	-0.0940539	0.165616	-0.0310106	0.0748814	-0.0267555	-0.059821	0.307098	-0.0645595	-0.166129	0.0170274	-0.0694453	0.0137429	-0.190941	-0.219892	-0.0664415	-0.0674024	-0.221479	-0.00981938
Larp1	0.837147	0.350277	0.425561	-0.106673	0.653643	0.315848	0.227362	-0.169331	0.228012	0.0339619	0.0456667	-0.0244717	-0.0501022	-0.0827928	-0.219872	-0.369281	-0.489054	-0.248976	-0.12034	0.0771045	0.207899
Trappc5	0.833384	0.410191	0.240679	0.0313549	0.543876	0.567322	0.531899	0.752979	-0.143483	-0.123705	0.074895	-0.244557	-0.148769	-0.572077	-0.599537	-0.119987	-0.393727	0.122887	-0.233275	-0.406163	-0.0743498
Tcf25	0.832703	0.32602	0.196945	-0.30588	0.254194	0.0285622	-0.0766357	0.264163	-0.111822	0.0281926	0.136204	-0.348656	-0.176687	0.258545	-0.343851	0.108143	0.114287	-0.255445	0.60403	-0.339191	-0.151352
Supt3	0.827013	-0.215745	0.117796	-0.0405621	-0.0334858	0.0977069	0.208264	0.0707267	-0.196575	-0.137833	0.0856979	-0.0534681	-0.135973	-0.207041	-0.106609	0.051851	-0.147383	-0.0960403	-0.0790854	-0.148401	0.148217
AA414768	0.82562	0.0941535	-0.140784	-0.0389756	-0.0159102	0.0599083	-0.0102259	-0.0161773	-0.104618	0.30767	-0.256961	-0.124546	-0.138758	0.0474961	-0.0121179	-0.0581996	-0.0995469	-0.0829897	-0.043495	-0.192624	-0.157921
Polb	0.823786	-0.160345	-0.0543856	0.328141	0.404298	0.249931	0.145848	0.0526586	0.523752	-0.0403339	0.331691	0.192807	0.198052	-0.389072	-0.503194	-0.423784	-0.335413	-0.641253	-0.290586	-0.334431	0.160953
Grina	0.823342	0.129207	0.138238	-0.0380193	0.464527	0.424977	0.314156	0.286248	-0.415542	0.316839	0.0278687	-0.607284	-0.586566	-0.249565	-0.208796	0.498764	-0.0352216	-0.314758	0.818155	-0.400782	-0.0696425
Gigyf1	0.822846	-0.0591404	0.432914	0.13271	0.773283	0.0943203	0.101813	-0.0867339	-0.0141098	0.208959	-0.238858	-0.202743	0.200276	-0.110706	-0.0144692	-0.334065	-0.280355	-0.0520706	0.288326	-0.18883	-0.467125
Setd8	0.821325	-0.0690559	-0.160111	-0.667196	-0.848094	-0.598825	-0.0738004	-0.346058	-0.379278	-0.102988	0.0964205	0.253805	0.205787	-0.880252	-0.0800067	-0.615392	-0.0912978	0.729382	0.545515	-0.50197	0.0263998
9330159F19Rik	0.820479	-0.26768	-0.327893	-0.323094	-0.311235	-0.244421	-0.17927	-0.158066	-0.148454	-0.372292	-0.434336	-0.360331	-0.287458	0.119279	0.0932011	0.631879	0.418061	0.081304	0.385764	0.049973	-0.217668
Mrpl52	0.820323	0.172106	0.254323	0.351627	0.329932	-0.190251	0.559211	0.484056	0.190732	-0.405877	-0.681585	0.184691	0.14906	-0.436248	-0.665334	-0.808955	-0.527891	-0.17355	-0.66696	-0.014202	0.669609
Ercc3	0.819935	0.28507	0.405863	0.0331289	0.540809	0.268128	-0.0457712	-0.0164483	-0.299034	0.0489308	-0.0993127	-0.140299	-0.143269	-0.145109	-0.024976	-0.0672707	-0.228601	0.148683	0.10925	-0.122227	-0.346654
Hddc2	0.815564	0.554307	0.611397	0.571882	0.589473	0.660456	-0.209438	0.0172479	0.478041	-0.296309	-0.0295108	-0.395888	-0.221059	-0.0172369	0.351268	0.0674447	-0.137577	0.310019	-0.163261	-0.442339	-0.659955
Rcbtb1	0.815428	0.25118	0.40224	0.26322	0.446717	0.382669	0.257123	0.549377	-0.0348622	0.711317	-0.195603	-0.417106	-0.446688	-0.270611	-0.326417	-0.443459	-0.432902	-0.00133014	0.315783	-0.234595	-0.480336
Rsph4a	0.815216	0.203073	0.624894	0.199211	0.626396	0.0413881	0.096373	0.0507451	0.312628	-0.176461	-0.00668681	-0.18111	-0.203153	-0.0597365	-0.0616498	-0.235678	-0.293214	-0.0583021	-0.0618274	-0.190459	-0.11725
Preb	0.814882	-0.297705	0.272555	0.285508	0.559773	0.264831	-0.148885	-0.261215	-0.341657	-0.28396	-0.126577	-0.313849	-0.142438	0.181846	-0.224895	-0.032951	0.198109	0.353482	0.534586	-0.336601	-0.522475
Mmgt2	0.81342	0.180835	-0.00482796	0.0890542	-0.0149991	0.481571	0.477996	0.16538	-0.168616	-0.105172	-0.349386	-0.352314	-0.284611	-0.281784	-0.10913	-0.0114953	-0.00447606	-0.103559	-0.23516	-0.220636	-0.25156
Mbd6	0.81177	0.255069	0.180385	-0.170349	0.192408	0.0730549	0.130858	-0.0522264	0.0211321	0.274485	-0.141865	-0.161558	-0.128074	-0.184574	-0.160065	0.0811475	-0.172057	-0.0261861	0.0887658	-0.140714	-0.317395
Rims2	0.809587	-0.00109394	0.665336	0.409932	-0.00522224	0.0639012	0.0786031	-0.0152153	-0.0583805	0.350904	-0.239101	-0.25216	-0.202543	-0.0197082	-0.00737558	-0.268349	-0.30136	-0.0860573	-0.0881807	-0.193143	0.28284
Stx16	0.808416	0.0769436	0.383794	0.257208	0.0634409	0.319335	0.0961388	-0.0449224	0.0961892	0.229437	0.245815	-0.387705	-0.414522	-0.242437	-0.0858527	0.13736	-0.0365881	-0.351155	0.122545	0.0449367	0.0415391
Rpl38	0.808214	-0.0929865	-0.265591	0.593463	-1.23837	-0.196814	0.308103	-0.314975	-0.896126	-0.599553	-1.53543	0.299212	0.194724	-0.22639	-0.233326	-0.952619	0.0384167	0.320118	-1.02215	0.141235	0.663187
Bend7	0.808134	-0.0460069	0.114524	-0.410621	0.140507	-0.0800554	0.287187	0.285173	0.774417	0.0434655	-0.00129522	0.0405696	-0.062555	-0.426273	-0.164208	-0.148865	-0.174907	-0.315858	-0.285113	-0.163684	-0.501112
Tomm34	0.807762	0.446783	0.477537	0.29212	0.695638	0.0540545	-0.264088	-0.112883	-0.627893	-0.0481633	-0.310084	-0.492203	-0.243176	0.518316	0.360775	-0.0243901	-0.0143534	-0.0816144	0.196813	0.17676	0.146099
Cog4	0.806082	0.102771	0.402179	0.099321	0.445734	0.13582	0.0229108	0.0998672	0.519622	0.311669	-0.1454	-0.292522	-0.0712258	-0.128743	-0.142939	-0.0618536	-0.219162	0.169889	-0.0128389	-0.0419107	-0.139823
Nudt18	0.805106	-0.131893	0.087422	0.118545	-0.228072	-0.0450048	-0.096143	-0.0120148	-0.272171	0.035784	-0.431385	-0.177142	-0.292735	0.156106	0.696434	-0.158068	0.0422177	-0.423945	-0.381467	-0.210193	-0.0947853
Ndnl2	0.804813	0.436249	0.511104	-0.154491	0.470827	-0.0299083	-0.173727	0.512447	0.630832	-0.568417	-0.442551	-0.603747	-0.599621	0.575836	0.517834	0.4819	0.394787	-0.83742	-0.232155	-0.441286	-0.939807
Chchd1	0.803913	0.328701	0.800502	0.146415	0.532381	0.049157	0.781426	0.787123	0.746906	0.174877	-0.391036	-0.543164	-0.498872	-0.453677	-0.595466	-0.302375	-0.409434	0.301045	-0.100848	-0.457897	-0.625358
Mrps12	0.803774	0.172043	0.584402	0.301752	0.326629	0.659083	0.573813	0.419219	-0.166412	0.00509247	-0.267756	-0.330742	-0.503761	-0.385141	-0.692148	-0.268907	-0.280113	0.120931	0.140399	-0.478035	-0.144198
Abcf1	0.802224	0.362487	0.190979	0.121096	0.205208	0.303109	0.0646775	0.447921	0.33051	-0.131557	0.00492885	-0.311741	-0.319915	-0.144139	-0.232551	-0.0965332	-0.0101603	-0.228824	0.0675189	0.0581646	0.106536
Txlna	0.801577	0.559451	0.209511	0.380855	0.0962378	0.790866	-0.0346759	0.0586257	0.445366	-0.466637	0.511233	-0.229769	-0.352381	0.00479968	0.17026	-0.0348589	-0.213715	-0.449394	-0.168853	0.118681	-0.223295
Pcbp1	0.800853	0.24777	0.402962	0.0609723	0.163914	0.0913912	0.142158	-0.164331	0.0878353	0.012073	-0.918229	-0.174583	-0.104686	0.202081	-0.219291	-0.32963	-0.215357	-0.0986837	0.0543328	0.363887	0.0401457
Mrpl20	0.799517	0.0648024	0.53182	0.371841	-0.0711661	0.01185	0.287905	0.172112	0.214314	0.146715	-0.730919	-0.210927	-0.494131	-0.20867	-0.392167	-0.528172	-0.115001	0.467551	0.113122	-0.280176	-0.520102
Knop1	0.799464	0.364799	0.0424048	0.259661	0.398986	0.147511	0.260445	0.384835	0.0989834	0.0528704	0.0174369	-0.178889	-0.115013	0.274437	-0.336769	0.0880967	-0.228228	-0.459849	-0.19305	-0.0968714	-0.589934
2510002D24Rik	0.794511	0.190527	0.192306	-0.00999601	0.368691	0.0740786	0.533539	0.295091	0.752505	0.159534	-0.10575	0.0993348	0.143937	-0.675701	-0.578997	-0.6099	-0.53674	-0.581814	-0.0943326	-0.156672	-0.578832
Inf2	0.794248	-0.357389	-0.216855	-0.400185	-0.291986	-0.394378	-0.393472	-0.325309	-0.306315	0.120757	0.164285	0.0751128	0.190525	-0.159041	0.260497	-0.0211474	0.0455344	-0.255016	0.0278952	0.148529	0.0399653
Etv4	0.793521	-0.225056	-0.248648	-0.184396	-0.240614	-0.114384	-0.149022	-0.121543	-0.114032	-0.0561582	0.540948	0.319914	0.326452	-0.124799	-0.131286	-0.210615	-0.285779	-0.127768	-0.127507	-0.170122	-0.153883
Ilf3	0.787649	-0.0803773	0.0272305	0.209743	0.511379	-0.0376612	-0.138956	-0.25899	-0.0482974	0.320003	0.264553	-0.250178	-0.188627	0.144826	0.199464	0.173597	-0.201748	0.00633347	0.351439	0.0340186	-0.103903
Susd4	0.78566	0.679345	0.0472048	-0.160483	-0.513723	0.000395554	0.0702775	-0.0492509	0.0149795	-0.218151	0.092995	-0.237572	-0.184174	-0.196727	-0.293515	-0.176117	0.0568498	-0.27227	-0.157387	0.531851	-0.36878
Zpr1	0.785376	0.0819354	0.136458	0.458596	0.1984	0.457763	-0.0905101	0.119667	-0.00767888	-0.0472117	0.0725461	-0.107087	0.0837339	0.125385	0.0758102	0.151904	-0.254541	-0.243079	-0.412124	-0.206316	0.200808
Eif5	0.783368	-0.421572	-0.000104986	-0.188814	-0.602694	-0.379708	-0.654894	-0.411911	-0.145622	-0.766329	-0.23686	0.113756	0.149745	0.615625	0.179163	-0.28458	0.372192	-0.00820951	0.288292	-0.064357	-0.148029
Clec2l	0.782206	-0.242848	-0.0420487	-0.0292096	0.123759	0.11008	-0.0346184	-0.0273868	-0.0256592	0.409156	-0.20049	-0.212137	-0.0910584	-0.0336525	0.106596	0.223233	-0.16387	-0.0415649	-0.0394099	-0.14818	0.0059077
Rilpl1	0.782179	-0.677975	-0.438009	-0.431231	-0.625736	-0.417926	-0.477813	-0.355897	-0.118497	-0.305626	-0.662899	-0.549993	-0.355965	0.111884	0.179749	0.379403	0.649694	0.344227	0.326052	0.479538	0.199102
Rad54l2	0.781641	0.273187	0.0409598	0.215043	0.413567	0.172189	0.000474458	-0.0318027	-0.176537	0.0221288	-0.0790421	-0.142317	-0.112969	0.124816	-0.11354	-0.31271	-0.114386	-0.138873	0.164793	-0.0487414	-0.0043216
Ssbp1	0.781554	0.267557	0.671547	0.354001	0.603326	0.302446	0.342753	0.645879	0.757327	-0.148906	-0.0824193	-0.354499	-0.361187	-0.571733	-0.532903	-0.0117777	-0.286473	0.514381	0.119868	-0.419046	-0.356714
Pick1	0.780677	0.377217	0.65681	0.0608564	0.00302566	0.219074	0.465507	0.511963	0.479309	-0.0877486	0.0800078	-0.164947	-0.143413	-0.392621	-0.185641	-0.283776	-0.333039	-0.236931	-0.365264	-0.276802	-0.41132
Mtif2	0.779695	0.0773524	0.418074	-0.19849	0.140224	0.343171	0.234009	0.15663	-0.0215076	0.179289	-0.129562	-0.368948	-0.265317	0.0149498	-0.0824773	-0.245373	-0.144709	-0.127683	0.37511	-0.0605665	-0.0699104
6330416G13Rik	0.774037	0.00183826	0.169828	-0.0147225	0.612041	0.131898	0.0481941	-0.00537297	-0.0965498	-0.0648606	-0.0569794	-0.210714	0.00601286	-0.0162607	-0.0139803	-0.0801123	-0.110705	-0.0630085	-0.056323	-0.0448972	0.143283
Eif4g3	0.772301	-0.391489	-0.428086	-0.58477	0.193136	-0.643835	-0.565249	-0.63461	-0.32467	0.272038	-0.0933579	-0.372593	-0.103366	0.23911	0.405893	0.386026	0.364806	0.0750499	0.702213	-0.0313326	0.328703
Fam84b	0.771938	0.242044	0.256856	-0.0631986	0.430334	0.638903	0.0841157	0.0582104	-0.338998	0.067107	0.579104	0.0857414	0.239651	-0.236971	-0.304735	-0.375152	-0.574346	-0.21937	-0.139868	-0.304473	-0.253645
Nr1d1	0.771199	-0.342979	-0.303015	-0.305338	-0.306086	-0.379673	0.519936	0.242958	0.441169	-0.0778126	-0.111842	-0.00519142	0.0534186	-0.520572	0.505608	-0.00516447	-0.25859	-0.582601	-0.329423	-0.147398	-0.94831
D630045J12Rik	0.770032	-0.316874	0.357625	0.052809	0.699473	0.0430709	0.0304289	-0.112935	0.0459861	0.0132023	-0.111495	-0.256789	-0.234186	-0.208931	0.0931751	0.0656893	0.0661784	0.0196118	0.264927	-0.28675	-0.244753
Srp72	0.768467	0.411105	0.385107	0.201504	0.152019	0.364834	0.0474656	0.308515	0.724571	0.167023	-0.422186	-0.310842	-0.284216	-0.25552	-0.00590557	0.0371157	-0.159827	-0.293123	-0.0218135	0.0584382	-0.170612
Akap8l	0.763754	0.615506	0.202974	0.00821972	0.27393	0.243853	0.19556	0.667409	-0.047901	-0.303845	-0.121916	-0.542359	-0.649038	-0.247614	0.203595	0.273781	0.283204	-0.263069	-0.204158	-0.439813	-0.752394
Slc38a10	0.763175	0.345828	-0.101236	0.150865	0.511176	0.278731	0.463333	0.498092	0.0254794	0.186167	-0.322298	-0.496188	-0.584915	-0.346905	-0.117805	0.334808	-0.044684	-0.488798	0.211815	-0.0656015	-0.404298
Rab24	0.757943	0.343437	0.518797	0.553107	0.344476	0.669126	0.412577	0.36125	0.156718	-0.117464	-0.139037	-0.349695	-0.42802	-0.187886	-0.181858	-0.614625	-0.265668	0.14752	0.234582	-0.564816	-0.349948
Usp32	0.757248	0.230178	0.306025	-0.100872	0.259246	0.328967	0.0503431	-0.226337	0.0437731	0.0886348	0.184659	-0.127462	-0.275767	-0.221468	0.17621	0.167866	-0.211678	-0.00977009	0.335097	-0.335488	-0.401622
Tpcn1	0.756281	0.388835	0.168056	0.101092	-0.256183	0.105929	0.391183	0.0732926	-0.383647	-0.0849271	-0.152929	-0.348243	-0.290456	-0.179187	0.0754117	0.143194	-0.022229	-0.192482	-0.117017	-0.184621	-0.00842597
Iqgap2	0.754628	-0.340126	-0.360723	-0.190881	0.684754	-0.111492	0.403754	0.561506	0.725449	0.380575	0.312797	-0.205547	-0.159657	-0.658133	0.0633334	-0.235144	-0.198853	-0.360282	-0.237004	-0.467262	-0.118416
Zc3h7a	0.754389	0.653339	0.511615	0.29127	0.368601	-0.0539868	-0.0396704	-0.233934	-0.248117	0.157869	0.369186	-0.132935	-0.116452	-0.118279	-0.123173	-0.0426741	-0.350374	-0.286016	0.222948	0.0898127	0.142455
Optn	0.752374	-0.342489	0.0111966	0.0448278	-0.174714	0.12365	0.15573	0.441274	0.688859	0.190529	0.327761	-0.281193	-0.149106	-0.222434	-0.0773026	-0.12456	-0.119532	-0.0779795	-0.0225908	-0.449176	0.610272
Tnpo2	0.751232	0.0240461	0.483213	0.0437521	0.569773	0.438417	0.00707001	-0.163133	-0.238315	0.367328	0.178865	-0.198665	-0.0965071	-0.355656	0.0311082	-0.0735032	-0.450936	0.118323	0.537771	-0.169955	-0.0923966
Cep164	0.748711	0.0564253	-0.119297	-0.0054809	0.229647	0.106176	0.141642	0.0621365	-0.001774	-0.0411943	0.398148	0.0854413	-0.266945	-0.232145	0.0158165	0.0520963	-0.158684	-0.363473	-0.267354	-0.363028	-0.551885
Renbp	0.747505	0.0712571	0.227127	-0.492087	0.105159	-0.496441	-0.467336	-0.336218	-0.293405	0.566852	-0.429205	-0.379384	-0.417024	0.300441	0.579469	0.361946	0.0976366	0.0609901	0.13841	-0.275484	0.574159
Atrx	0.74619	0.478616	0.466405	0.23139	0.615182	0.637682	-0.112758	0.0854068	0.180951	0.0925579	0.21929	-0.689615	-0.566211	-0.401923	-0.236044	0.431842	0.0540644	-0.0280885	0.52978	0.142546	-0.776032
Eml5	0.743233	0.180362	0.389156	0.292679	0.722671	0.222945	0.004358	0.0380979	-0.13534	-0.111323	-0.0514116	-0.162702	-0.147453	-0.151801	-0.124988	-0.190896	-0.196916	0.122345	0.144388	-0.246785	0.0667465
Trip11	0.742418	0.0887032	0.301304	-0.118849	0.451178	0.10721	-0.0700011	-0.0840036	-0.0335703	-0.212912	-0.075562	-0.00351316	-0.0946418	0.0799902	-0.257767	-0.184648	0.0637082	-0.615007	0.150026	0.0827527	-0.188969
Nme2	0.740908	-0.20907	-0.153135	0.414984	-1.45524	-0.60965	-0.266282	-0.508675	-0.56221	-1.14608	-1.6735	-0.223131	-0.11205	0.239562	0.51833	0.016901	0.613716	0.60157	-0.708595	0.246724	-0.139709
Nlk	0.740826	-0.0893108	0.0783228	-0.0998594	0.450596	-0.303814	0.369224	0.106563	0.0571781	-0.0329456	-0.0416965	-0.246108	-0.235079	-0.137127	-0.343141	-0.157309	-0.0227084	0.234901	0.135162	0.0356379	-0.25223
Rdm1	0.739021	0.272238	0.109607	0.422632	0.0555422	0.540138	0.39263	0.659275	0.191671	-0.30986	-0.200784	-0.37885	-0.459458	-0.487117	-0.0737564	0.1414	-0.0269169	-0.0185169	-0.316311	-0.336333	-0.193705
Eif2ak4	0.737063	0.0803671	0.253554	0.0100362	0.360107	0.315628	0.0194155	-0.00166381	-0.241357	-0.0418534	0.115918	-0.160433	-0.170496	-0.0796301	-0.0974664	0.091424	-0.258075	-0.0961468	0.137296	0.309521	-0.099809
Trmt112	0.73598	0.187595	0.612266	0.394795	0.0187342	0.603191	0.404632	0.430699	0.297575	-0.211365	-0.597017	-0.139165	-0.320603	-0.418513	-0.0929094	-0.254865	-0.237734	-0.327729	-0.330011	-0.38472	-0.134769
Arhgap17	0.735413	-0.21693	0.392677	0.335332	0.713999	0.152313	-0.159992	-0.0292188	-0.399037	0.0169067	-0.00178951	-0.227271	-0.0563659	0.000477819	0.0373982	0.0685355	-0.144151	-0.132876	0.236192	0.0421743	0.400558
Pdcd11	0.734547	0.296752	0.322907	0.414032	0.537739	0.233769	0.0871673	-0.225222	0.112811	-0.159945	0.366795	-0.1048	-0.291775	0.0214436	-0.0420073	-0.11474	-0.183001	-0.330392	0.351765	-0.124502	-0.482181
Kbtbd11	0.734521	-0.240738	0.361029	-0.171438	0.475561	-0.167979	-0.317887	-0.268997	-0.253329	0.523927	-0.353217	-0.126923	-0.0228778	-0.0541212	-0.00740097	-0.2637	-0.108615	-0.152578	-0.0888097	0.60194	-0.0455023
Gzf1	0.733806	0.152834	0.287408	0.55214	0.326809	0.316235	-0.0517086	-0.0550327	-0.266955	-0.000391727	-0.073136	-0.29857	-0.349872	-0.0555512	-0.193849	0.0410048	-0.059206	0.0250204	0.303172	0.0517061	0.0844394
Tsacc	0.732374	0.236774	0.589458	0.180668	-0.00837915	0.174209	0.41831	0.226439	-0.0200005	0.0265196	-0.191324	-0.215219	-0.20327	-0.306421	-0.212338	-0.173107	-0.23767	-0.0405793	-0.109431	-0.175812	-0.174708
Med24	0.731937	-0.32039	-0.181539	0.257316	-0.189778	0.297738	0.473753	0.0919337	-0.256009	-0.192513	0.138688	-0.223677	-0.0225681	-0.0832905	-0.123186	-0.0855617	0.00361742	-0.372869	-0.0226582	-0.194528	-0.504967
Tspyl2	0.728416	0.261893	0.308023	-0.148762	0.249796	-0.0131923	-0.0122808	0.0064551	-0.621708	-0.152199	-0.0718674	-0.331822	-0.285545	0.0439752	0.30596	-0.0547092	0.205615	-0.211773	0.0763814	-0.205347	-0.100601
Gart	0.728068	0.0211204	0.422327	0.12208	0.368041	0.548397	0.207708	0.356128	0.0767592	-0.202463	0.42554	-0.164855	-0.0100578	-0.100832	-0.296053	0.0343579	-0.241035	-0.127703	-0.0907979	-0.263101	-0.40669
Cdyl	0.726208	-0.263727	0.196123	-0.18288	0.132575	0.246475	0.0448712	0.0533928	0.233359	-0.321463	0.402011	0.182886	0.00549668	-0.0388826	-0.099286	-0.304873	-0.21738	-0.396107	0.0230059	-0.248819	-0.0904923
Sdcbp2	0.724632	-0.140074	-0.030563	-0.0666944	-0.0682778	-0.132501	-0.0598042	-0.0652259	-0.0611419	0.137893	0.058514	-0.0757596	-0.0280868	-0.0198268	-0.0701281	0.175863	-0.120554	-0.0286166	-0.0727279	0.0128097	0.422152
Hoga1	0.723597	-0.25437	0.111801	0.205863	-0.0283313	0.359855	-0.0485582	-0.0644069	0.112003	0.0770389	0.190269	-0.107665	-0.047529	-0.0013485	0.0242656	-0.0210175	-0.206306	-0.0142222	0.0128856	-0.0339136	-0.210839
Lonrf3	0.71652	-0.172052	-0.20161	-0.180876	0.448693	0.184164	0.143221	-0.432994	0.0287824	0.0937739	0.313678	-0.373296	-0.465316	-0.201213	0.489722	0.282342	0.162215	-0.317028	-0.307488	-0.356493	0.0656828
Prrt1	0.716285	-0.12601	-0.103578	-0.0692943	-0.0959341	-0.124924	-0.199272	-0.0715209	-0.165099	-0.116914	-0.233141	-0.213463	-0.15664	0.339276	0.267152	-0.0596096	0.114114	0.0149055	0.0261125	0.103533	0.0025967
Timm8a1	0.711431	-0.162418	-0.292146	-0.332531	-0.346616	-0.215597	-0.204096	-0.214805	-0.16775	-0.124601	-0.418424	0.168701	0.241441	0.279729	0.317424	-0.0865157	-0.110345	-0.0703277	-0.00442986	-0.198699	0.126422
Acp1	0.710212	0.00382525	0.196195	-0.346627	-0.301876	0.0192494	0.442212	0.512626	0.490242	-0.194091	-0.33967	-0.544915	-0.479969	-0.57819	-0.0616326	0.627591	0.17843	0.2376	0.274355	-0.40068	-0.725796
Slc45a3	0.709767	-0.0851892	-0.117617	-0.12525	-0.111105	-0.0561213	-0.101241	-0.0589305	-0.078302	-0.179722	0.0929243	0.191291	0.214465	-0.034918	-0.0226794	-0.138759	-0.149054	-0.0869143	-0.0862593	-0.158638	-0.101436
Nmnat3	0.708903	-0.0502798	0.139175	0.101509	0.11875	0.105975	0.0372648	-0.0464531	0.281966	-0.156336	0.0806071	-0.0993713	-0.11751	0.0307468	0.0731531	0.0993218	-0.110456	-0.0755985	-0.0746165	-0.151578	-0.0298249
Rnpepl1	0.708092	0.226161	0.698328	0.129142	0.61927	0.141608	0.30639	0.158296	-0.0612693	0.210321	0.269667	-0.238465	-0.35893	-0.342317	-0.314188	-0.163502	-0.368419	-0.0891108	0.261251	0.0125757	-0.0629036
Paf1	0.705013	0.0353421	0.36591	0.33387	0.0515157	-0.120397	-0.191418	0.144135	-0.148269	-0.224778	0.184791	-0.320624	-0.373299	0.0769983	0.105936	0.35667	0.0863355	0.136719	0.0834526	-0.206513	0.537399
Ftsj3	0.703978	0.306947	0.304382	-0.041915	0.340085	0.0825084	-0.139621	-0.0159215	-0.225162	-0.249224	0.143349	-0.0728496	-0.182122	0.12436	0.199477	0.155517	-0.147464	-0.313095	0.121432	0.247225	-0.208783
Scai	0.703486	0.384959	-0.0426114	-0.303044	0.228617	0.224266	0.151521	0.179988	-0.513186	0.422068	-0.0233241	-0.259362	-0.190689	-0.111053	-0.0439648	-0.237028	-0.130192	-0.0387464	0.318839	-0.269119	-0.515324
Abcb10	0.699779	-0.0674636	0.341142	0.00932136	0.550291	0.18872	0.132041	0.0783874	-0.199459	-0.13173	-0.184851	-0.127596	0.0243813	-0.0903692	-0.0717379	0.154203	-0.100315	-0.212154	-0.06281	-0.247139	-0.212411
Ppp1r37	0.699737	0.29743	0.46253	0.0350114	0.165435	0.290848	0.226767	0.235726	0.695436	0.569952	-0.335343	-0.35274	-0.300769	-0.241568	-0.214403	-0.263984	-0.162772	-0.358767	0.0565841	-0.191058	-0.547098
Ttc1	0.69754	0.300594	0.253854	0.0641234	0.543753	0.0400104	0.279915	0.278957	0.540179	0.0274212	-0.506059	-0.268797	-0.316751	-0.341483	-0.415771	-0.161146	-0.0190146	-0.196242	0.186367	0.00213956	0.127989
Zfyve16	0.697068	0.1684	0.232608	0.209757	0.0559072	0.156639	0.406892	0.0840462	0.0163165	0.345419	0.146917	-0.206843	-0.27729	-0.296318	-0.0826374	-0.165569	-0.256139	-0.489669	-0.240667	-0.100781	0.0935897
Ppa1	0.696341	-0.0585146	0.103374	0.00103181	0.257391	-0.212792	-0.280891	0.249831	-0.866647	-0.847444	-0.128352	0.266357	0.506837	0.426064	0.235176	0.293265	-0.03654	-0.743359	-0.740336	-0.314211	-0.69055
Pkn1	0.694676	0.120135	0.356993	-0.16144	0.654915	0.540625	0.204273	0.335089	0.369849	-0.0931015	-0.260188	-0.307664	-0.275857	-0.239912	-0.0706899	-0.0951655	-0.112733	-0.165428	-0.112333	-0.0156812	0.293501
Echdc1	0.694144	0.187251	0.44087	0.248505	0.298772	0.52065	0.221961	-0.0454472	-0.0464749	-0.0107099	-0.209219	-0.220578	-0.080049	-0.369078	-0.184178	-0.275897	-0.17167	0.0702399	-0.186035	-0.0065791	-0.151175
Ufsp2	0.692102	0.342436	0.583165	0.231344	0.415821	0.385221	0.179592	0.383815	0.650613	-0.0187245	-0.163441	-0.474811	-0.643911	-0.453607	-0.103058	-0.0296149	-0.0925787	0.4952	0.511877	-0.380096	-0.441729
Rem1	0.688418	-0.38224	-0.290866	-0.230619	-0.277418	-0.2443	-0.311084	-0.2623	-0.246996	-0.352177	-0.542521	-0.470458	-0.329194	0.335164	0.41107	0.631674	0.625496	-0.145691	-0.0980186	-0.179477	-0.195457
Abcf3	0.685264	0.257207	0.434268	0.314835	0.479371	0.113441	0.0448626	0.245299	-0.0838626	-0.0739079	-0.143667	-0.0781003	-0.209677	-0.0313826	0.00028198	-0.0671526	-0.245428	-0.324122	-0.0465673	0.190378	-0.332713
Arfgap3	0.681919	-0.0814943	-0.0176884	-0.199292	0.468122	-0.253859	-0.457119	-0.379166	-0.29992	0.35918	-0.0381716	0.252282	0.336145	-0.324151	0.373713	0.189206	-0.176931	-0.36857	-0.0999518	-0.415166	-0.449548
Puf60	0.675824	-0.000556159	-0.0148967	0.0334906	0.428249	0.00775185	-0.175021	0.117281	-0.129733	0.0992295	0.0924105	0.0738365	0.223253	0.0540458	-0.128311	0.172945	-0.228554	-0.189918	0.00128038	-0.131976	-0.622717
Pwwp2a	0.672247	-0.121487	0.162419	-0.0395654	0.177402	-0.091086	-0.296431	-0.220132	-0.712409	-0.0130294	0.286813	-0.119609	-0.245908	-0.0779066	0.179509	0.310338	0.0503522	0.0143381	0.227314	0.114155	0.0276068
Fgfr1op2	0.671399	-0.0521861	0.251092	-0.259315	0.146205	0.467699	0.522869	0.321976	-0.495095	-0.00780816	-0.119327	-0.459207	-0.37981	-0.694259	-0.304012	-0.291511	0.0476203	0.0868904	0.242904	-0.0936923	-0.0210068
Arhgef10l	0.670263	-0.0858662	-0.0909242	-0.143057	-0.125669	-0.141922	-0.105655	-0.117105	-0.109847	0.299778	0.350266	0.0289147	-0.0489052	0.031025	0.0747787	-0.163011	-0.16649	-0.117995	-0.11634	-0.0672486	0.0588465
Mt3	0.664112	0.047994	-0.238597	-0.316288	-0.203279	-0.189214	0.311818	0.0180493	-0.30604	-0.00467535	-0.288585	-0.154431	-0.250333	0.157949	0.0908106	0.262383	0.127851	-0.260024	-0.188964	-0.735951	-0.0594352
Smcr8	0.662775	0.0390494	0.065636	0.0319244	0.361406	0.0930277	0.0519566	-0.00037391	0.0701608	0.234184	0.0285622	-0.162336	-0.0058165	0.132533	-0.207858	-0.129974	-0.147557	-0.151548	0.0462786	-0.056982	0.159689
AA987161	0.660957	-0.0148294	0.0948083	-0.0875523	-0.229581	0.0261464	-0.114536	-0.00188312	0.147203	0.225776	-0.317081	-0.221129	-0.196435	-0.0526734	0.00320135	0.314972	0.0275092	0.0189569	0.387597	-0.174253	0.130378
G6pdx	0.660333	0.651452	0.415189	0.38444	0.163276	0.152379	0.570132	0.46013	-0.367157	0.409945	-0.155898	-0.249601	-0.288645	-0.520776	-0.288656	-0.224289	-0.448693	-0.402529	-0.466245	-0.282393	0.176151
Epb4.1	0.660261	0.579381	-0.182428	-0.0572525	0.111421	0.431702	0.305657	-0.0929881	-0.0775684	0.416823	0.0403887	-0.269732	-0.342731	-0.46512	-0.271006	-0.423316	-0.169272	0.124648	0.184925	-0.194269	-0.0895939
D17Wsu92e	0.658827	0.0401854	-0.268798	-0.214407	0.0371393	-0.381491	-0.270591	-0.136366	0.225521	0.2226	-0.181344	0.107437	0.123361	0.0704188	0.100398	-0.547084	-0.00648465	-0.382479	-0.0199467	0.0855981	0.149931
Erf	0.657385	-0.300231	-0.324477	-0.0479666	0.389208	-0.158216	-0.284933	-0.530022	-0.107836	-0.0143695	0.0283552	0.0819497	0.0580911	0.0290924	0.624227	0.0781713	-0.0470652	-0.16572	0.00566935	-0.0895463	-0.641805
Ubn2	0.656834	0.561829	0.528395	0.132971	0.574184	0.394185	-0.164301	-0.202225	0.0718722	-0.02129	0.425408	-0.404915	-0.482801	-0.254275	0.126105	0.359252	0.0709557	-0.33264	0.608688	-0.216141	-0.942267
Zfp593	0.656463	-0.0118685	0.19366	0.141156	0.274287	0.107646	0.461341	0.278491	0.22946	-0.43682	0.0703903	0.070226	0.329492	-0.0546188	-0.183224	-0.444656	-0.269767	-0.81199	-0.668544	-0.0493479	-0.274143
Hmox2	0.65644	-0.133751	0.346302	0.231879	0.352957	0.205684	0.439486	0.494531	0.256333	0.133285	0.135733	-0.544361	-0.386796	-0.44792	-0.421611	-0.145513	-0.069491	-0.0335365	0.207892	0.0280439	0.291728
Scrn2	0.655367	-0.0892169	0.335746	0.0268124	0.250385	0.0903917	0.0360017	0.168122	-0.107941	0.0646641	-0.0771844	-0.139424	-0.0562244	0.00577664	-0.0793169	-0.028405	-0.136959	-0.00371617	0.0240331	-0.0831014	-0.110596
Aamp	0.654402	0.200541	0.211907	0.245093	0.372449	-0.054978	0.109441	0.418062	0.233386	-0.00249943	-0.62785	-0.253332	-0.396363	0.345079	0.0683928	0.139645	0.0765404	-0.742656	-0.289632	-0.133192	-0.174157
Snrnp25	0.652686	0.00325834	0.272774	0.351148	0.0284544	0.156351	-0.0697274	0.0154028	-0.00306291	0.281435	-0.0365368	-0.307597	-0.307791	-0.222191	-0.0379697	-0.22821	-0.106179	0.590067	0.0560794	0.0172724	-0.198495
Aldh4a1	0.652376	-0.0734335	0.365034	0.208404	0.488279	0.45452	0.205403	0.0516991	0.563086	-0.164792	-0.0372722	-0.182432	-0.227616	-0.160179	-0.144069	-0.211479	-0.0310609	-0.184102	-0.141843	-0.206964	-0.129299
Pex1	0.651914	0.184295	0.537454	0.217521	0.496979	0.0458067	0.0361429	0.0779332	-0.0984081	0.101615	-0.311069	-0.235316	-0.147088	0.0151942	-0.0453708	0.0118085	-0.168958	-0.130458	0.131034	0.0364488	-0.235633
Gorab	0.651834	0.278282	0.104753	-0.0493057	-0.0655434	0.00110169	-0.0350663	0.273351	0.342709	-0.0584922	-0.408322	-0.192372	-0.170243	0.148135	0.240444	0.111058	0.115182	-0.229628	-0.363858	-0.28961	-0.264816
Ubn1	0.650791	-0.163716	0.219208	-0.320209	0.403142	-0.409134	-0.410779	-0.446964	-0.64126	-0.292887	-0.302198	-0.0415805	-0.26005	0.305204	0.383906	-0.230846	0.273051	-0.557203	-0.0675804	0.419934	0.292064
Whamm	0.650743	0.198173	0.343376	-0.14358	0.397025	0.0587328	-0.137311	0.374604	-0.0312417	0.216367	-0.122659	-0.398147	-0.239775	0.202768	0.101907	-0.162234	0.0749469	-0.278338	-0.233428	0.272894	-0.141319
Nudt16l1	0.645183	0.249586	0.565334	0.274319	0.330259	-0.159656	0.171499	0.247297	0.0941066	0.123539	-0.229885	-0.263917	-0.368233	-0.14712	-0.0104926	-0.0211514	-0.15982	0.0586046	0.106489	-0.06795	-0.260203
Fzd3	0.645147	-0.00392733	0.448914	-0.0226801	0.547283	0.30795	0.37426	0.257866	-0.197932	0.0830792	-0.118809	-0.395917	-0.299277	-0.244256	-0.116633	0.136098	0.026577	-0.139086	0.0822425	-0.362185	-0.477892
Mnt	0.64361	0.428626	0.250025	0.168531	0.630759	0.0738675	0.0506094	-0.0336581	0.0563889	0.111456	-0.388681	-0.149849	-0.14552	-0.392308	-0.211515	-0.0420441	-0.0627265	-0.0210215	0.360929	-0.260449	-0.232534
Nup153	0.642303	0.38687	0.438374	0.197903	0.14039	0.281902	-0.257199	-0.275588	0.186279	-0.114	0.179725	-0.0961934	-0.049659	0.0499048	0.173521	-0.285981	-0.154837	-0.152589	0.388345	-0.00751836	-0.169108
Sh3gl1	0.641221	-0.0145735	0.0259065	0.212112	0.590663	0.273899	-0.0559888	-0.0591369	-0.536361	-0.171108	-0.365157	-0.0132795	-0.0678302	0.133014	0.135242	0.116637	-0.0923073	-0.410649	-0.480782	0.0245035	0.375776
Afg3l2	0.638929	0.280891	0.306024	0.161709	0.604303	0.0949624	0.108201	0.0318853	-0.250111	0.0215466	0.0656117	-0.110674	-0.299777	-0.220869	0.0508475	-0.489274	-0.123144	-0.115185	0.28796	-0.232864	-0.191901
H2-Ke6	0.63793	0.0483668	0.102362	0.355582	0.239455	0.0339372	0.457603	0.304116	0.254636	0.109675	-0.25557	-0.390012	-0.354986	-0.607582	-0.467742	0.0344311	-0.0570643	0.371257	-0.0296234	0.109035	-0.524783
Nol4l	0.636733	0.498736	0.306624	-0.07948	-0.181168	-0.0738608	-0.133612	-0.116218	-0.108946	0.225017	-0.24963	-0.162616	-0.142867	-0.0486142	-0.000100145	-0.115779	-0.17269	0.242427	0.319926	0.132872	-0.0616963
Prr3	0.636034	-0.0141218	0.375395	0.213992	-0.322978	0.0337134	0.231185	0.0471877	-0.0958906	0.0268464	-0.0169076	-0.360906	-0.209943	0.296107	0.2186	-0.173471	-0.0263388	-0.157755	-0.120109	-0.0236201	-0.30182
Wdr83os	0.635864	-0.315776	0.0948368	-0.141074	0.412177	0.589499	0.493463	0.544385	-0.0806196	-0.00176361	-0.446175	-0.313713	-0.282427	-0.427056	-0.116767	0.14831	-0.101755	-0.225863	-0.236863	-0.194477	-0.00146912
Plek2	0.635465	-0.121929	-0.11045	-0.243591	-0.174581	-0.161925	-0.184241	-0.188398	0.163611	-0.287363	0.289907	0.534859	0.334794	-0.222871	-0.16424	-0.307338	-0.370253	-0.169579	-0.238968	-0.210802	-0.252648
Rnf41	0.631845	0.216319	0.490603	0.0196136	0.378714	0.303785	0.260454	-0.0187445	0.138479	0.0345467	-0.36869	-0.294385	-0.0807803	-0.493289	0.0328276	-0.138179	-0.0266271	-0.0986342	-0.0526919	-0.0747848	-0.313666
Rcc2	0.62936	0.130002	-0.354132	-0.0833543	-0.117917	-0.146744	-0.200599	-0.22105	-0.239614	-0.192322	-0.00227674	-0.0241299	-0.0477547	0.514136	0.0566679	-0.270916	0.0358612	0.0864699	0.258956	0.030089	-0.0814989
Ttc38	0.629317	-0.0993012	-0.118488	0.390686	-0.164327	-0.0415469	0.356045	0.372008	0.460523	0.0935543	-0.0407132	-0.214975	-0.0822453	-0.211531	-0.124457	0.0156471	-0.0832513	-0.240614	-0.0913038	-0.237623	-0.27092
Atg4d	0.625591	0.0834879	0.262169	0.185526	0.619013	0.0808486	0.25332	0.0418483	0.32854	0.205714	0.0108611	-0.190467	-0.234444	-0.278425	-0.264346	-0.0368276	-0.159334	-0.0341204	0.0489645	-0.138722	-0.074628
Zc3h15	0.625557	0.136847	-0.0184479	-0.143622	0.263431	0.0528101	0.023196	0.0883863	-0.145144	-0.152715	0.0676395	0.164919	0.118481	0.221686	-0.0412645	-0.185352	-0.125091	-0.456896	-0.358512	-0.240636	-0.52828
Reep6	0.625475	0.256805	0.157199	-0.0060626	-0.0607352	0.0352267	0.324281	0.00194539	-0.120805	-0.0919096	-0.160586	-0.135134	-0.0746333	-0.0668628	-0.130418	0.00157294	-0.0847395	-0.114597	-0.11283	-0.146828	-0.105842
Cdk4	0.625259	0.158651	0.453935	0.233105	0.00240224	0.287036	0.518438	0.258702	0.187731	0.0933901	-0.74568	-0.32159	-0.169254	-0.230154	-0.0534138	-0.316134	-0.0418386	-0.155193	-0.590642	-0.250113	-0.941812
Cipc	0.623415	0.225899	-0.151356	0.16665	-0.0647042	-0.127567	0.0687901	-0.0420125	-0.390259	0.256922	0.0210711	-0.0139255	0.00971775	-0.243397	-0.181961	-0.47456	-0.207046	-0.0726388	0.510586	-0.160038	-0.151061
Cep70	0.622044	-0.0609004	0.302215	-0.0328973	-0.0194924	-0.139194	0.0807864	0.245358	-0.199771	0.1582	-0.0474924	-0.174891	-0.062429	0.0074026	-0.185187	-0.209232	-0.0518678	0.0208351	0.10421	-0.0964878	-0.0367143
Fam195a	0.62077	0.166835	0.449807	0.553371	0.412543	0.11078	0.502804	0.272389	-0.174917	-0.0890753	-0.26358	-0.321907	-0.312653	-0.25863	-0.359613	-0.150668	-0.0703329	0.120491	-0.252597	-0.292361	-0.306805
Tmem245	0.619319	0.00778709	-0.194016	-0.301254	0.407006	0.00452167	-0.161206	-0.1119	-0.335467	0.241673	0.0214137	-0.149121	-0.128406	0.0674937	0.0466206	-0.0189788	-0.00828303	-0.0199652	0.581267	-0.0602455	-0.300341
Gosr2	0.619282	0.0145357	0.326061	-0.0718962	0.173144	-0.270512	0.404956	0.460128	-0.184409	0.248999	-0.00111252	-0.346152	-0.262001	-0.0841968	-0.11096	0.0898498	-0.063644	-0.496557	-0.183459	-0.0938044	0.144119
Ssx2ip	0.618021	-0.0247324	0.534172	0.593463	0.277772	0.144848	0.344063	0.000269567	0.0750103	-0.122748	-0.226578	-0.295091	-0.0180411	0.181314	0.178719	-0.0666854	-0.124464	-0.325311	-0.264255	-0.390762	-0.229011
Cep63	0.6163	0.0572461	0.307046	0.145297	0.00045747	0.100913	0.0506103	0.0573264	-0.0614666	-0.103779	0.0548253	-0.127764	-0.0443425	-0.170291	-0.294979	-0.0211357	0.0292392	0.129659	-0.163143	-0.229853	-0.0527337
5031439G07Rik	0.613786	-0.0703873	0.0357913	0.101424	0.303314	0.157395	-0.183871	-0.165424	-0.363353	-0.0705575	-0.31478	-0.0566218	-0.0901359	0.173312	0.18776	0.0184911	0.0301317	-0.350523	-0.185519	0.00699728	0.26776
Ccnf	0.60947	-0.203299	-0.202984	-0.00393783	-0.237835	-0.0639899	-0.125053	-0.101053	-0.110005	-0.201666	0.126965	0.0582904	-0.0176318	0.443533	-0.0478684	0.381062	-0.125266	-0.113141	0.0443198	-0.191954	0.281849
Polr2a	0.605779	-0.380552	-0.0611337	0.179627	-0.0294483	0.402274	-0.078457	-0.15025	0.227657	-0.0351141	-0.172343	-0.61387	-0.670574	0.0842129	-0.059652	-0.028443	0.588739	-0.493446	-0.439516	0.250049	0.464186
Tmc6	0.6057	-0.185175	-0.17906	0.0642746	-0.227146	0.0443193	0.36348	0.278432	0.160523	0.00144723	0.548032	0.0292834	0.0827651	-0.318654	-0.0647621	-0.16633	-0.379146	-0.367422	-0.134836	-0.120443	-0.0963324
Aasdhppt	0.601198	0.388264	0.419126	0.10502	0.0350344	-0.000699931	0.193123	0.378972	-0.241457	0.20737	0.121718	-0.275776	-0.131612	-0.12884	-0.178402	-0.176561	-0.226642	0.157851	0.224581	-0.147694	-0.453584
Pnp2	0.59953	0.00312932	-0.159923	0.065454	0.075611	-0.0306288	-0.0535467	0.0791881	-0.15087	-0.0558118	-0.0968564	-0.129584	0.00477619	0.180357	-0.0603319	0.337876	-0.0647075	-0.143914	-0.0563016	0.197207	0.117477
Taf6l	0.599368	0.0847841	0.206543	0.0539412	0.336208	0.135208	0.0591353	0.24234	-0.166585	0.0305396	0.203681	-0.10517	-0.117384	-0.115806	-0.107999	-0.0866413	-0.181281	-0.0612197	0.124807	-0.0393113	-0.069322
Tmem63b	0.599171	0.447098	0.0609097	-0.262611	0.12456	0.207736	0.104401	-0.165678	-0.0693725	0.372137	0.361915	-0.180782	-0.0262057	-0.0977584	-0.211532	-0.0181715	-0.282206	0.137499	0.420551	-0.169661	-0.295481
Garem	0.596237	-0.168129	0.23163	-0.348947	-0.102118	0.0299666	0.0206023	0.0326199	-0.137109	0.164199	-0.262505	-0.215144	-0.231843	0.0928672	0.162023	0.043552	0.0795233	0.0860775	-0.0608343	-0.171545	-0.196552
Ikbkb	0.593878	0.136165	-0.0372312	0.0587081	0.50415	-0.128059	-0.192952	-0.205932	-0.372477	0.0848489	0.361307	-0.125247	-0.0190722	0.0593388	0.0168656	-0.0536533	-0.0885763	-0.0158512	0.122248	0.124784	0.458397
Prpf4	0.593478	0.528743	0.592218	0.344791	0.214233	0.0277672	0.123339	-0.0687119	-0.147112	-0.146806	-0.0748543	-0.26419	-0.0794947	0.085519	-0.0342035	-0.270913	-0.103729	-0.21948	0.139822	0.217797	-0.247517
Gadd45gip1	0.591604	0.259527	0.344952	-0.00356783	-0.249142	-0.127691	0.323041	0.248709	0.556408	0.151459	-0.374505	-0.239485	-0.180272	-0.0738197	-0.19662	-0.252336	-0.134029	-0.0220185	0.138657	-0.0122853	-0.373455
Cdk5	0.591072	0.0681418	0.176169	-0.0416523	0.453038	0.255944	0.172601	0.455846	-0.0361999	0.0846531	-0.193452	-0.24558	-0.194374	-0.131083	0.128495	-0.213855	-0.129377	-0.194036	0.0392481	-0.126675	0.00623672
Klrg2	0.590107	-0.0478731	-0.133616	-0.178799	-0.194253	-0.118445	0.0424019	0.0414178	0.169478	0.0026572	0.157543	0.0814749	0.169103	-0.075021	0.158584	-0.100076	-0.206813	-0.190011	-0.0467177	-0.165571	-0.00866925
Ctnnbip1	0.5892	0.0433677	0.182398	-0.659494	-0.223961	-0.579996	-0.251955	-0.153792	-0.090796	0.211048	-0.183288	0.167594	0.257947	-0.176134	0.138796	-0.281917	-0.259846	-0.257455	-0.202558	0.467229	0.10137
Rsc1a1	0.587922	0.14328	0.152857	-0.0977369	0.306801	0.179387	-0.0401549	0.0572152	-0.372593	-0.000142049	0.20511	-0.165006	-0.0604891	-0.115042	0.137089	0.0181036	-0.159864	-0.00171929	0.0422709	0.198863	-0.0820536
Acd	0.587826	-0.163351	0.14769	-0.112336	0.120119	-0.068604	-0.00221178	0.0163301	-0.212846	0.0675587	-0.156813	-0.195829	-0.0453459	-0.208679	0.082367	-0.110136	0.0131805	0.0366503	0.1875	0.0812026	0.224558
Nars2	0.587652	-0.210811	-0.115427	0.209316	0.498321	0.0335567	-0.0148306	0.170349	0.101482	-0.0315251	0.00643469	-0.170829	-0.153413	0.0107249	0.0184112	0.0581915	-0.00581945	0.0744217	0.138957	-0.114171	-0.219424
Ephb6	0.585971	0.181232	-0.120977	-0.0955821	0.308228	-0.138723	-0.0954913	-0.129373	-0.206434	0.0119198	0.367205	-0.0293897	0.0585784	-0.217081	0.232358	-0.0571127	-0.1286	0.0592818	0.30947	-0.246415	-0.209116
Cdca7l	0.581283	-0.17097	-0.0509984	0.0188728	-0.123886	-0.0259268	0.0373345	-0.0742328	0.388794	-0.158687	-0.0156416	0.00113735	-0.0877644	-0.0207813	-0.0778643	0.0443121	-0.0343528	-0.036797	-0.07148	0.0865232	-0.0878754
Ccbl2	0.579991	0.0559388	0.0839559	0.0613414	0.286771	-0.0320972	0.360811	0.362158	0.375834	-0.0661613	-0.0801883	-0.18841	-0.162639	-0.253715	-0.19404	-0.0671519	-0.0840773	-0.0546891	-0.0228927	-0.188441	-0.122948
Btf3l4	0.5784	0.0518423	0.462935	0.315304	0.293113	-0.37311	0.525272	0.509277	0.296821	0.336026	-0.452484	-0.322686	-0.462831	-0.315791	-0.393031	-0.166446	-0.148599	0.220242	0.0560805	-0.585339	-0.630571
Stam2	0.575576	-0.0469921	-0.0815649	-0.175232	0.418378	-0.0230571	0.208448	0.181931	0.174244	0.127231	0.331821	-0.123687	-0.196668	-0.275298	-0.0128243	-0.15768	-0.149068	-0.270282	0.182907	-0.0533544	0.349252
Dhps	0.575441	-0.0436801	0.338378	-0.296495	-0.430156	0.0810341	-0.0335907	-0.174107	0.0112629	0.0965008	0.546504	-0.0501558	0.0377391	0.409293	0.0643004	-0.188635	-0.168929	-0.350424	-0.290116	-0.126556	0.44615
Ctns	0.575006	0.0656137	0.37601	0.272102	0.184734	0.490096	0.299298	0.370512	-0.291474	0.0615516	-0.0607654	-0.277896	-0.202603	-0.307293	-0.143987	-0.112755	-0.144306	-0.188464	-0.182377	-0.111838	-0.101662
Cacna2d3	0.574385	0.191371	-0.1663	0.136471	-0.155887	0.178011	-0.124071	-0.0700281	-0.0968364	-0.229714	-0.267096	-0.209795	-0.173398	-0.107707	0.200975	-0.0428738	0.203902	0.0921957	-0.0278908	-0.148186	-0.134828
Fbxo7	0.573112	0.0542361	0.125833	0.0690299	0.15942	0.265916	0.134394	0.253282	-0.37437	0.0787079	0.340284	-0.103627	-0.110025	-0.122832	-0.0374029	-0.0334462	-0.21315	-0.249917	-0.316851	0.0302493	-0.0359516
Eif3a	0.572651	-0.0638544	-0.100458	-0.350226	0.279184	-0.0391371	-0.259312	-0.268676	-0.702585	-0.230038	0.507072	0.370174	0.164419	-0.363021	-0.202578	-0.531132	-0.184241	-0.00185784	0.0291966	0.183678	-0.23009
Tmem102	0.572151	0.37855	0.298321	0.0589324	0.211349	0.0653007	0.222873	0.105909	0.337952	0.044587	-0.0573296	-0.151073	-0.110857	-0.0874397	-0.11763	0.0339798	-0.160003	-0.143514	-0.139751	-0.0778398	-0.137115
Cml1	0.571922	0.0833942	0.225694	0.178469	-0.108686	0.0298367	0.208239	0.322268	-0.188387	-0.00727735	0.00565733	-0.130996	-0.154871	-0.134406	-0.202378	-0.137804	-0.119011	-0.00874026	-0.0973106	-0.0900873	-0.0489477
Ubald2	0.566654	0.378866	-0.0763029	-0.381176	-0.217377	0.0146615	0.122903	0.346172	-0.36381	0.064218	-0.292332	0.180995	0.0533229	-0.640617	0.105131	-0.216032	-0.416858	-0.780783	-0.760876	0.510814	0.0204358
Ankzf1	0.565458	0.295911	0.41065	0.416377	0.406696	0.0383594	0.0428654	0.22782	-0.0198842	-0.178191	-0.0141879	-0.168494	-0.0742255	-0.110869	-0.0668412	0.0551944	-0.102806	-0.0101637	-0.0198786	-0.179933	-0.285148
Cgn	0.564405	-0.11227	0.030882	0.0838203	0.537859	0.387051	0.243509	0.257536	0.103286	-0.04574	0.344667	-0.0435974	0.243298	-0.202508	-0.210222	-0.242465	-0.283328	-0.22077	-0.212628	-0.235064	-0.126834
Surf2	0.563123	0.203571	0.0587655	0.0141671	0.469628	0.0692956	0.234609	0.139143	0.120101	0.0387187	-0.199681	-0.238703	-0.0551337	-0.23495	0.00285994	-0.263641	-0.0337012	0.170649	0.0923419	-0.267751	-0.397558
Cdk10	0.561013	-0.0429998	-0.0158383	0.182347	-0.150557	0.0937307	0.297701	0.408467	-0.377869	0.193974	-0.1173	-0.32132	-0.370269	-0.222956	0.0114233	-0.0328807	-0.0129707	-0.0209674	-0.0209077	-0.192469	0.0640604
Mettl8	0.559152	0.0253733	0.198943	0.107497	0.0705048	0.102776	0.183989	0.165973	0.179104	-0.0308687	-0.201916	-0.151123	-0.103793	-0.139894	-0.106255	-0.0640266	-0.0423352	-0.0170944	-0.128491	-0.105637	-0.13019
Vps26b	0.558183	0.424448	0.532986	0.248196	0.404366	0.237936	0.273457	0.510299	-0.378943	0.0678675	-0.187112	-0.441242	-0.384355	-0.351048	-0.107755	-0.104878	-0.0755834	-0.0281782	0.23071	-0.0910691	-0.275611
Mapk12	0.55767	0.235688	0.076649	0.175201	-0.0633529	0.0493133	0.510283	0.430779	0.152584	-0.0511042	-0.0661748	-0.209473	-0.148226	-0.336758	-0.347519	-0.166246	-0.188373	-0.31004	-0.301836	0.257282	-0.166479
Dvl2	0.556896	0.477283	0.31298	0.158198	0.215678	0.00748214	0.0864174	0.0659877	-0.047975	-0.0129643	-0.0061386	-0.227866	-0.169447	0.0245761	0.0317111	0.0334057	-0.0418696	0.0355352	0.0389367	-0.3388	-0.0584278
Usp7	0.555988	0.428562	0.387075	-0.0296734	0.544485	0.135129	-0.0784144	-0.0859622	-0.626107	0.0456543	0.305653	-0.044575	-0.152154	-0.108859	-0.085092	-0.308076	-0.261697	0.067477	0.435347	0.0210374	-0.101254
Dpagt1	0.55484	0.400716	0.223091	-0.197415	0.376063	0.471704	0.156791	0.224014	-0.198769	-0.0297693	0.158611	-0.218147	-0.268051	0.105168	-0.0439561	0.0383075	-0.155999	-0.293998	0.0845226	-0.00787224	-0.265138
Gm6251	0.554468	-0.0747203	0.11208	-0.278176	-0.0189062	0.143384	-0.0342427	-0.0148825	-0.373858	-0.0960626	0.24404	0.0895409	-0.0659728	-0.0343958	0.21289	-0.398164	-0.156556	-0.146614	-0.354394	-0.102901	0.418998
Nck2	0.553189	-0.20214	-0.052024	-0.0166471	0.260626	0.143255	0.14146	0.050031	0.237492	-0.212136	0.0685608	0.069745	-0.0326645	-0.3391	-0.292385	-0.139005	-0.208288	0.227023	0.413454	-0.0855252	-0.273882
Ndst2	0.548976	0.145264	0.356403	-0.0288301	-0.10032	0.150088	-0.0587019	-0.122574	-0.268423	-0.0336421	0.303323	-0.0729874	-0.00464191	0.00315078	0.185371	-0.114335	-0.218603	-0.0999029	0.0505853	-0.0273909	0.186265
Uchl1	0.537048	-0.263899	-0.21857	-0.185169	-0.20461	-0.0849497	0.0186666	0.0256572	0.216222	0.241131	0.0883593	-0.171057	0.0126361	0.172225	-0.110621	-0.0151589	-0.0396718	0.0114685	-0.149934	0.357674	-0.227968
Nsun2	0.532723	0.0197917	0.401152	0.184497	0.0469878	-0.0121056	-0.0839707	-0.0341593	-0.244188	0.045953	0.331309	-0.0681077	0.154187	0.137855	-0.0374245	-0.306455	-0.163544	-0.243178	0.0804259	0.137709	-0.402392
Slc25a28	0.532517	0.350331	0.196248	-0.129319	0.0153491	-0.01138	0.421862	0.378045	-0.175669	0.219179	-0.108742	-0.300302	-0.117033	-0.353169	-0.0252114	0.203808	-0.13278	-0.530445	0.0432004	-0.147562	-0.107334
Enoph1	0.526583	0.198551	0.0806641	0.156468	-0.140096	0.00984463	0.0389141	0.0733457	-0.0295057	0.0199221	-0.099898	-0.118029	0.0660645	-0.129586	0.154769	-0.248585	-0.124956	-0.0567578	-0.0728804	0.0247564	0.112458
Vps29	0.526401	-0.0413075	0.276457	-0.311705	-0.349986	-0.438579	-0.0163348	0.49676	0.337632	0.223942	-0.55771	-0.133072	-0.120729	-0.0509333	-0.19724	-0.198679	-0.214358	0.161533	0.416349	0.143645	0.38792
Tollip	0.525335	-0.0985724	0.0735797	-0.245088	0.448656	-0.321808	-0.0941683	-0.0963783	-0.0657975	0.305332	0.259664	0.0848047	-0.00763945	-0.193265	0.134763	-0.315498	-0.257893	-0.159688	0.126642	-0.038492	0.16842
Utp15	0.52503	-0.0598262	-0.250153	-0.219679	0.0876298	-0.152544	-0.205432	-0.217262	-0.152253	-0.184573	0.0747867	0.0491079	0.0630396	0.289185	0.32993	-0.0521222	0.0320517	0.0403465	0.111632	-0.285143	-0.129932
Dpm2	0.523665	0.13655	0.460125	0.308071	0.444246	0.133882	0.385494	0.158293	-0.0457223	0.0678544	-0.178646	-0.117755	-0.18796	-0.185138	0.0506926	0.0855312	-0.319684	-0.32361	-0.0399986	-0.399418	0.0220022
R3hdm1	0.522863	-0.0553382	0.268016	-0.0106091	0.182546	0.0576667	0.132318	-0.190013	-0.0250132	0.189129	0.263674	-0.295459	-0.0627511	-0.0860778	-0.20195	-0.353787	0.00805292	-0.00477889	0.206674	0.211445	-0.216782
Zmym6	0.5209	0.00938419	0.213674	0.0329789	0.327117	-0.0317706	0.122775	0.10733	-0.117066	0.173982	-0.0941991	-0.150064	-0.129979	0.00948389	-0.0193328	-0.0698821	-0.0960816	-0.0462682	-0.0705201	-0.163877	0.0698697
Tmem11	0.520194	0.109757	0.216568	-0.12872	-0.503966	0.0477535	-0.0743471	0.0918104	0.132009	-0.589115	-0.00202229	0.150114	0.287205	0.425634	0.109559	0.0371402	-0.0480616	-0.666747	-0.411744	-0.0260764	-0.514145
Impa2	0.520025	-0.205472	-0.0992736	-0.0703491	0.021393	0.0896496	-0.116527	-0.00788312	-0.10955	-0.11135	-0.249924	-0.120742	-0.0362675	-0.0746455	-0.0478925	0.0300136	0.0525142	0.180944	0.00392751	0.223104	0.243327
Pomc	0.519097	0.423025	0.0775545	0.271212	0.196324	0.189972	-0.01235	-0.00740617	-0.00689926	-0.026297	-0.197188	-0.145996	-0.134807	0.0966973	-0.0155963	0.187816	-0.136177	-0.0105948	-0.042037	0.0704148	0.0225527
Maml3	0.518001	0.118534	0.0903353	0.0644968	0.2097	0.121028	0.108776	0.0335201	0.361544	-0.0962093	0.199565	-0.310821	-0.249513	0.0340485	-0.0805995	-0.0320877	0.129675	-0.0534635	-0.0145116	-0.0654855	-0.0485696
Gtf2f1	0.517859	0.0443396	-0.0860836	0.129332	0.387419	-0.351417	0.00120682	0.328056	-0.840102	-0.354391	0.204181	-0.144242	0.0566197	-0.206577	0.0887854	0.234786	0.129577	-0.23385	-0.129866	0.021374	-0.108597
Prpf6	0.516969	0.446553	0.482801	0.192988	0.159264	0.421443	0.0228031	0.45615	0.071481	0.169128	-0.377049	-0.425534	-0.293261	-0.0720926	-0.146254	-0.0331265	0.0279554	-0.13484	0.00544752	-0.138642	-0.0704025
Zfyve26	0.514738	0.300554	0.238667	0.170671	0.206773	0.129389	0.0609403	0.0199963	0.157368	0.0812666	-0.0796698	-0.141966	-0.0381445	0.0525736	-0.0583599	-0.173815	-0.169872	0.00831903	0.0979572	-0.0968852	-0.144556
Pgm2l1	0.510572	-0.192677	-0.0776994	-0.10209	0.474677	-0.133832	-0.132046	-0.00918318	-0.196501	-0.167303	-0.12533	-0.16019	-0.151826	0.0505214	-0.062285	-0.0512391	0.0531157	0.446094	0.312423	0.250054	-0.190391
AK129341	0.509316	0.299389	0.279025	0.0818027	0.314507	-0.0239685	0.145123	0.251931	-0.0129429	-0.00357004	0.261808	-0.0246649	-0.143716	-0.259321	0.0820219	0.0788874	-0.21063	-0.269361	-0.258487	-0.135986	-0.32142
Hoxb3	0.509253	0.257218	0.383339	0.121536	0.330984	0.132421	0.197271	0.357245	-0.246298	0.230367	-0.134562	-0.0591218	-0.182675	-0.202024	-0.22304	-0.0813862	-0.299557	-0.118721	-0.196212	-0.117236	-0.250062
Gm166	0.508854	-0.0550894	0.0703635	0.448254	0.372013	0.371671	0.175163	0.136238	0.0161617	-0.0712342	-0.123851	-0.0949272	-0.177962	-0.159771	-0.163568	-0.184299	-0.174444	0.0301593	0.120092	-0.0760503	-0.236956
Capn15	0.506303	0.235803	0.273767	0.11113	0.114334	0.035592	0.0115944	0.0881473	-0.208639	-0.154233	0.293259	-0.0790622	0.0808914	0.282835	0.135581	-0.0304136	-0.0569612	-0.284478	-0.434509	-0.160616	-0.375553
Arcn1	0.506014	0.29996	0.466738	0.254853	0.469384	0.0238055	0.23696	0.311494	0.446179	-0.182252	-0.0135831	-0.187571	-0.0738441	-0.273874	0.0710782	-0.182333	-0.115882	-0.363961	0.0455812	-0.125328	-0.242887
Hax1	0.505116	0.169376	0.17439	0.188512	0.230091	0.427074	0.0277236	0.0371392	-0.710702	-0.42995	0.159494	-0.350296	-0.0598093	0.214376	0.252506	-0.00958733	0.194257	-0.333653	-0.179579	-0.164876	0.131842
Rexo4	0.50477	0.19517	0.381307	0.113763	-0.111997	0.234659	0.0917219	0.356695	0.439253	-0.0164196	-0.0804982	-0.152165	-0.277754	-0.109317	-0.318212	-0.168231	-0.0599996	-0.0989017	0.305701	-0.0802176	-0.210007
Dhx32	0.504037	0.201797	0.393921	-0.0355048	0.348403	0.252435	0.283048	0.232951	-0.0760429	0.144826	0.264828	-0.145469	-0.0324613	-0.230019	-0.346484	-0.0649283	-0.318335	0.0832333	0.273709	-0.29112	-0.301304
Sft2d3	0.501353	0.464544	0.327197	0.22999	0.306109	0.376418	0.0656735	0.166682	-0.291041	-0.109882	0.19369	-0.137759	-0.0757057	-0.0395832	-0.0728013	0.0426071	-0.181582	-0.158613	-0.0176782	-0.0810416	-0.209829
Ung	0.500774	0.0821158	0.204024	-0.0615579	-0.173948	0.193147	0.069503	-0.0780145	0.182361	-0.0687858	-0.210139	-0.0994866	-0.140133	0.100406	-0.00331171	0.027583	-0.0220576	-0.130234	-0.130207	-0.0323887	-0.0570274
Tmem126b	0.500535	-0.0161069	0.467921	-0.112385	0.495759	0.488684	0.401702	0.428606	0.340552	-0.0283175	-0.13846	-0.330051	-0.251667	-0.2677	-0.339658	-0.171335	-0.151895	0.056473	0.163509	-0.215895	0.158414
Ap5s1	0.500171	0.105697	0.0683702	0.0225258	0.190868	0.135835	0.0387266	0.347244	0.243984	0.246881	-0.110723	-0.220486	-0.0577047	-0.191497	-0.151145	-0.18325	-0.030722	-0.0247296	0.00811472	-0.0902627	-0.118403
Rbm6	0.499016	0.0538167	0.131453	-0.3421	-0.00490458	0.0744202	-0.0566559	0.177051	-0.0676313	-0.0355023	0.249249	-0.0172118	-0.211581	0.0742503	0.0243645	-0.25351	-0.020673	-0.192735	-0.00317673	0.107784	-0.275903
Cdk13	0.498342	0.0156753	0.0843389	-0.327897	-0.0256012	-0.0552656	-0.239129	-0.104286	0.0696592	0.119711	0.455542	0.0491055	-0.247949	0.269711	0.0476637	0.280095	-0.14567	-0.218386	0.218846	0.208164	-0.474324
Pla2g6	0.496903	0.33672	0.044237	-0.0181583	0.332707	0.255858	0.261389	0.0756825	-0.212933	0.0798439	-0.106252	-0.164147	-0.0493297	-0.222624	-0.120748	-0.0967047	-0.148513	-0.0901583	0.131292	-0.179059	-0.027307
Gnl3l	0.495838	0.0484138	0.0178731	0.0790487	0.0690816	-0.355116	0.136109	0.0430575	0.137746	0.383733	-0.203557	-0.238073	-0.234124	-0.192983	-0.0488013	-0.0480247	-0.00440219	0.159118	0.02296	0.0723619	-0.566865
Chchd4	0.494943	0.191266	0.0488775	-0.394516	-0.113392	-0.0591635	0.0576429	-0.0494278	0.276548	0.139259	0.100981	-0.0551733	0.113942	0.313487	0.0471542	-0.471269	-0.133093	0.0298282	0.135479	-0.250933	-0.321546
Sirt7	0.493357	0.0494375	0.447793	0.235788	0.440122	0.0904207	0.175936	0.253059	0.0886936	0.291698	-0.211416	-0.198289	-0.232543	-0.040618	-0.121276	-0.0255497	-0.239366	-0.332267	-0.273063	0.0441731	0.397345
Atf2	0.491851	0.108708	-0.189884	0.100915	0.0980981	0.199995	-0.149083	-0.242381	-0.373532	-0.124666	0.144397	0.0312521	0.0295442	-0.23249	0.214792	0.0138871	-0.0596589	0.0437344	0.133277	-0.0844613	-0.260482
Tmem120b	0.491166	0.0176136	0.096847	0.0369674	0.438493	0.0951995	-0.12355	-0.0834927	-0.16795	-0.164268	-0.0632373	-0.203632	-0.0964939	0.123538	0.141674	-0.116936	0.00604706	0.0303951	0.170966	0.0042944	0.187138
Nudt13	0.490552	-0.182425	0.14801	-0.00676812	0.375706	0.00914849	0.175185	0.0986516	0.13505	-0.062202	-0.0340189	-0.156967	-0.105823	0.0294723	0.107737	-0.0470559	-0.0200085	-0.112896	-0.0914326	-0.053959	-0.304734
Trim41	0.489519	0.129528	0.146807	0.46707	0.486997	0.356135	0.071025	-0.177097	0.162305	0.0646323	0.105131	0.000421631	-0.0279862	-0.194717	-0.212598	-0.334334	-0.250856	-0.0277883	-0.261694	0.0053524	-0.118827
Exph5	0.489121	0.143607	-0.0472743	-0.136678	0.257797	0.00290129	0.0722859	-0.00678166	-0.0329068	0.231146	-0.23669	-0.191985	-0.152924	-0.0412471	0.00688537	-0.0347333	0.0183064	-0.049714	-0.0501759	-0.00270058	-0.0876936
Nde1	0.485196	-0.118113	0.0886216	-0.138406	0.457038	0.146726	-0.0872705	-0.137439	-0.203784	-0.0300169	-0.235519	-0.0304242	0.130773	0.00618596	0.0376877	0.0270859	-0.125815	-0.0960723	0.130254	0.150823	0.0969838
Trp53bp2	0.484195	-0.087309	0.148568	0.0156686	0.44849	0.365065	0.137608	-0.156397	0.0792096	0.0637231	0.423959	0.0457089	-0.0774436	-0.182685	0.250348	-0.234036	-0.273331	-0.301561	-0.266514	-0.252985	-0.365953
Ist1	0.48332	-0.0601412	0.297018	-0.153325	-0.117332	0.00190088	0.00261324	-0.11752	-0.839438	0.1161	-0.0784113	-0.0284866	0.0863584	0.16062	0.361139	-0.286965	-0.0551079	-0.711014	-0.257206	-0.222791	0.442917
Pfdn2	0.480836	-0.275074	0.175741	-0.170139	0.110587	-0.731259	-0.0489846	0.0987038	0.0751159	-0.158773	-0.520419	-0.0107788	-0.163347	0.290744	0.108817	-0.29786	0.190756	0.0989632	-0.19144	-0.150743	0.0337821
Tpgs1	0.478932	-0.0256221	0.389454	-0.151859	0.451925	-0.016542	0.356517	0.295616	-0.326143	0.31281	-0.272716	-0.45903	-0.421798	-0.362058	-0.164531	0.236982	-0.0257941	0.305552	0.00476375	-0.00460728	-0.249728
A230050P20Rik	0.477077	0.072912	-0.250843	-0.145712	-0.239809	-0.220969	-0.195374	-0.151693	-0.204172	0.0745658	-0.22211	-0.187404	0.104995	0.281058	0.304119	0.0485347	0.181875	-0.210847	-0.209566	0.0700691	-0.00291912
Ampd2	0.477001	-0.0250504	-0.139608	-0.166839	0.255198	-0.0569783	-0.161815	-0.20898	0.0874665	0.0741657	-0.183927	-0.223549	-0.185862	0.319636	0.301709	0.23678	0.0228666	0.0156838	0.0853868	0.17717	-0.0345515
Mtmr10	0.476832	-0.0453213	0.439154	0.0194197	0.380414	0.253083	0.0194362	-0.0147995	0.291584	0.320462	0.202864	-0.204702	-0.0406188	-0.242322	0.201956	-0.0913711	-0.204608	-0.169097	0.112657	-0.166512	-0.095605
Las1l	0.476358	0.0781525	0.115395	0.221021	0.371808	0.291005	-0.18183	0.287915	0.0319709	-0.417594	-0.332017	-0.26361	-0.0980889	-0.420628	-0.418185	0.0059388	0.390823	0.0171491	0.424286	-0.103035	-0.360965
Slc35c2	0.475787	0.386151	0.170734	0.0641853	0.00276177	0.0389065	0.034192	0.0615168	-0.226246	-0.0103584	-0.219117	-0.0833654	-0.147098	-0.176338	0.0562271	-0.0554671	-0.126164	0.123713	0.32062	-0.127825	-0.124319
Pygo2	0.475561	0.118893	0.101815	0.147762	-0.0203168	0.0954964	0.0934578	0.181976	-0.189854	-0.0451868	0.062483	-0.13367	-0.00253764	-0.0261577	-0.0610137	-0.0624906	-0.0225597	-0.206753	0.0424355	-0.0835816	-0.202273
Mplkip	0.474353	0.398233	0.211724	-0.00886752	0.107021	0.112873	0.160271	0.0230128	-0.0843245	-0.20861	0.291418	0.0959916	0.0670714	-0.0654709	-0.224868	-0.412866	-0.257477	-0.197954	0.161596	-0.103796	-0.378047
Nufip1	0.472965	0.112885	0.335955	-0.0871949	0.370943	-0.173901	-0.033918	-0.0975763	0.167371	-0.104301	-0.162278	0.0856288	0.222407	0.388657	0.0323968	-0.10754	-0.211632	-0.487317	-0.198942	0.151644	-0.185497
Ankra2	0.472536	0.148556	0.140221	0.371187	0.398685	-0.090352	0.300155	0.136617	0.402885	0.202684	0.101379	-0.249476	-0.370275	-0.178172	0.0372675	-0.283565	-0.116437	-0.105226	-0.0688486	-0.11446	-0.0137722
Ino80b	0.472164	0.0476415	0.284131	0.237978	0.275261	-0.0268883	0.389372	0.275077	-0.0548154	-0.116113	-0.172133	-0.0768172	-0.297407	-0.466819	-0.233602	-0.138369	-0.18485	0.0437442	-0.0229089	0.0585228	-0.311992
Phf3	0.470776	-0.222584	-0.212863	0.200385	-0.0701933	-0.129694	0.00143977	-0.164753	0.190754	0.116128	0.266042	-0.0203068	0.104633	-0.337451	0.0254955	-0.0900934	0.051951	-0.266643	0.00361054	-0.144947	-0.135873
Mocs1	0.469823	0.00180012	0.0983097	0.0182104	-0.142832	-0.00542547	-0.0334348	0.0757822	0.144919	-0.0341294	-0.117024	-0.00817645	-0.0793786	-0.0224422	-0.0392104	-0.0103676	-0.0841247	0.0753565	0.156828	-0.114273	-0.0526586
Rbm48	0.469822	0.13627	0.130476	0.293061	0.31898	-0.00916653	-0.0796299	0.197797	-0.232847	-0.138403	-0.105809	-0.242874	-0.114956	0.272691	0.26385	0.0996623	0.0327394	-0.250163	0.287351	-0.227208	-0.254
Mppe1	0.468716	0.40874	0.407878	0.0885436	0.316961	0.355602	0.144491	0.207601	0.180186	-0.101911	-0.283214	-0.206513	-0.2716	-0.177798	0.201617	-0.14159	-0.070395	-0.149107	-0.140011	-0.181347	-0.192361
Herc3	0.467857	0.0583211	-0.0804947	-0.0153909	0.0310803	-0.0520418	0.188185	0.191533	-0.217475	0.18705	-0.184558	-0.137327	-0.176234	-0.225413	-0.234365	-0.163344	-0.0204569	0.113917	0.176838	-0.128129	-0.104613
Rad9a	0.466174	0.266027	0.234471	0.110888	0.438161	0.245566	0.166367	0.109536	0.189556	-0.0596326	0.242243	-0.213715	-0.0926089	-0.0647503	-0.0593639	-0.201155	-0.145609	-0.0795968	0.0152065	-0.175527	0.0486011
Higd1a	0.465806	-0.053106	0.456422	0.428534	0.335576	0.0241061	-0.140909	-0.295184	0.0747987	-0.143043	-0.421426	0.319382	-0.240863	-0.650401	-0.0949387	-0.822351	0.251856	0.330118	-0.294595	-0.815885	-1.60406
Rpp25l	0.465293	-0.14081	0.454266	0.0705702	0.411433	-0.0889066	0.044227	0.0515725	0.361473	0.161543	-0.242637	-0.269506	-0.352563	-0.34994	-0.127031	-0.136125	0.0630775	0.214163	0.204873	0.142735	-0.264287
Ddx46	0.465283	0.407047	0.0210179	0.111494	0.211004	0.0626118	0.222279	0.344368	-0.0546055	-0.238973	0.296324	-0.19474	-0.0677027	-0.270781	-0.409833	0.0587315	0.0535099	-0.43066	0.185758	0.0082632	-0.214974
Coq4	0.464548	0.315314	-0.161809	0.118732	0.291691	0.241328	0.365828	0.384526	0.121772	0.015068	-0.160433	-0.177581	-0.105844	-0.2449	-0.221208	-0.115942	-0.183157	-0.134768	0.0415422	-0.109591	-0.0196702
Zfp839	0.461698	0.149742	-0.0283098	0.127614	0.0628988	-0.114642	0.0328209	0.155292	-0.127861	0.0279103	-0.168823	-0.100924	-0.0367373	0.037522	-0.100863	-0.0523236	-0.0415098	-0.0416071	0.00316325	0.0371069	0.0478335
Ddi2	0.461683	0.259973	0.125294	-0.11289	0.31265	0.247045	0.0206765	0.07499	-0.059079	-0.0111009	0.340937	-0.160845	-0.0408846	-0.115033	0.118872	-0.00320318	-0.176618	-0.0688399	-0.0255559	0.200538	-0.154742
Pptc7	0.461671	0.0566959	0.203631	-0.309705	-0.00996446	-0.196697	-0.189455	0.13552	0.107855	0.235267	-0.0173984	-0.201946	-0.164171	0.115461	0.204731	0.244195	0.00768442	0.00775288	0.143875	-0.0588015	0.0741929
Sart1	0.460716	0.0435098	0.259431	-0.010812	0.101697	0.216961	0.0178542	0.420297	0.0213468	-0.0308351	-0.233203	-0.0431309	-0.0197335	-0.0297441	-0.188078	-0.316087	0.00342849	-0.340745	-0.314471	-0.149319	-0.0677483
Klf16	0.46037	-0.208822	0.149427	0.270223	0.098005	0.181104	0.0974473	-0.109072	-0.288369	-0.26765	-0.360035	0.148847	0.0498871	0.106752	0.00793675	-0.351234	-0.0335146	-0.433026	0.000207197	-0.386412	-0.367065
Nat10	0.459897	0.201832	-0.159173	-0.167589	-0.0703603	-0.0447568	-0.0265811	-0.00255328	-0.213741	0.0145811	0.173796	-0.113801	0.0641378	0.00452946	-0.05875	0.168025	-0.037028	0.055789	0.424322	-0.114062	-0.219439
Bloc1s6	0.458465	0.106536	0.161879	0.121542	0.0858158	0.124912	0.212091	0.344042	-0.428512	0.321807	-0.130794	-0.265705	-0.205457	-0.220137	-0.383273	0.0711355	-0.13259	-0.0329269	0.351573	0.0491304	-0.242278
Kri1	0.457989	0.0815191	0.0232072	0.240741	0.258328	0.0123677	0.03815	0.0325045	-0.306846	0.0972564	-0.0792985	-0.102585	-0.102672	0.0691161	-0.00217872	-0.0564161	-0.122294	-0.0886817	0.0282642	0.144846	-0.233167
Prpf38b	0.457959	0.27188	0.117789	0.0308955	0.19231	-0.421429	-0.186742	-0.253982	-0.624213	0.22657	0.390818	0.0629161	-0.178104	0.234101	0.433077	0.248257	-0.134833	-0.551263	-0.962064	-0.0659059	0.156274
Adprhl2	0.457276	0.243784	0.111646	0.0455912	-0.263603	0.162342	-0.0501613	0.107766	-0.261785	0.0190179	-0.0215483	0.0222458	-0.0224259	0.164909	0.013662	0.162254	-0.182162	-0.234469	-0.0130223	-0.124473	-0.100257
Zfp780b	0.45627	0.243989	-0.0345396	-0.285938	-0.0854422	0.249538	0.107511	0.277218	-0.330367	-0.131576	0.0115686	-0.184218	-0.106258	0.195691	-0.0565216	0.067949	0.00552929	-0.185903	0.183934	-0.0545221	-0.132855
4833420G17Rik	0.455337	0.32565	0.352235	0.198429	0.287997	0.289331	0.00950238	0.413972	0.295893	-0.101674	-0.0402684	-0.220154	-0.264597	-0.00989365	-0.0960203	0.170347	-0.0284775	-0.184345	0.21077	-0.130538	-0.211474
Dnaja3	0.455036	-0.00919165	0.391697	-0.136932	0.255163	0.120194	0.0660544	0.146273	0.243012	0.104979	-0.12465	-0.0976492	0.00952817	-0.0354937	-0.00276376	-0.309783	-0.0929017	-0.177433	-0.29943	0.0996415	-0.365375
Ptrh2	0.451705	0.154082	0.272671	-0.0171611	0.288706	0.143214	0.0216966	0.111971	-0.0834963	-0.0433537	-0.0498847	-0.0324004	-0.147991	0.154151	-0.201636	-0.119453	-0.200447	0.216786	0.0796485	0.0455451	-0.275395
Bod1	0.451161	0.254524	0.269256	-0.0642741	-0.211759	-0.0596784	0.0812533	0.0141459	-0.217914	-0.0350444	-0.360506	0.160625	0.0212292	0.208212	0.0277325	-0.350539	-0.221903	-0.229341	-0.358611	-0.0888554	-0.400782
Spata5	0.450725	0.156864	0.0573374	-0.0807692	0.190036	0.0969905	-0.0352238	0.00858657	-0.110916	-0.191965	0.00685006	0.0596808	-0.159181	0.241435	0.0434785	-0.027711	-0.0202053	-0.307982	-0.0267192	-0.221873	0.0091653
Gle1	0.449071	0.30416	0.00475928	0.0874926	0.105012	0.349348	0.0847207	0.120972	-0.611394	0.0605573	-0.0589902	-0.127567	-0.319165	-0.373955	-0.219851	-0.0720229	-0.0205322	0.11647	0.395515	-0.13562	-0.440564
Tpra1	0.448136	0.0130772	0.0323352	-0.130279	0.222566	0.18425	0.207831	0.269104	0.0240917	0.276584	-0.212283	-0.177823	-0.204684	-0.213149	-0.107206	-0.124963	-0.0922124	-0.199615	0.128886	-0.0778809	-0.142781
Arhgap8	0.447673	0.188742	0.0248166	0.0809655	0.0729322	-0.063152	-0.0511034	0.0740981	0.354924	-0.0229966	0.141133	0.225292	0.084188	-0.318933	-0.0142906	0.0733612	-0.194031	-0.299701	-0.228176	-0.295287	-0.220216
Hgh1	0.447423	-0.0947692	0.187973	0.182444	0.0583471	0.205733	-0.0454261	0.213285	-0.235458	-0.074329	0.0106475	-0.0611299	-0.0350312	0.348921	-0.0112983	-0.243081	-0.0899519	-0.117344	0.00284862	-0.213214	-0.158491
Tmem191c	0.446424	0.264593	0.25298	0.141827	0.0841217	0.31388	0.242046	0.0865562	0.334529	-0.154706	-0.189264	-0.215577	-0.0834584	-0.140861	-0.121685	0.0748767	0.0336734	-0.179228	-0.206346	-0.166208	-0.217646
Frrs1	0.446373	-0.17885	-0.135381	-0.203276	-0.181509	-0.159707	-0.0295751	0.0975926	-0.164469	0.0736806	0.264231	0.0587583	-0.0181343	-0.021982	0.180373	-0.233283	-0.0618052	-0.160395	-0.111059	-0.232723	0.203685
Psmg4	0.445083	-0.287268	0.152202	0.235033	-0.0128677	0.376317	0.112323	-0.260211	-0.0290906	-0.234848	-0.568027	-0.175859	0.128565	-0.298105	0.200557	-0.140911	0.0842981	0.13712	-0.0756129	-0.189158	0.0191591
Ddx42	0.44497	0.373262	0.191608	0.169782	0.262922	-0.0173456	0.211673	0.104398	-0.181242	0.0943577	0.240299	0.0168388	-0.209874	-0.310872	-0.282609	-0.135224	-0.0801474	-0.758876	-0.297524	-0.0318735	-0.168186
Armcx4	0.443677	-0.190241	-0.139279	-0.135624	-0.132009	-0.0754739	-0.150899	-0.125559	-0.117964	-0.0338182	-0.192016	-0.12651	-0.0525307	0.29858	0.196044	0.278093	0.132794	0.0233554	0.0477653	-0.119334	-0.126924
Snrnp70	0.442196	0.386697	0.358358	0.0796254	-0.0229039	0.12252	-0.17057	0.03288	0.259326	-0.213353	0.233187	-0.07456	-0.125244	0.0518755	-0.249016	-0.0850414	0.161808	-0.405339	-0.426788	0.150532	-0.621704
B9d2	0.441457	0.0296576	0.0507921	0.153212	0.130405	0.091342	-0.075521	-0.187375	0.292199	0.108696	-0.218445	-0.250753	-0.1764	-0.0766247	0.155468	-0.209412	0.0803763	0.165175	-0.029866	0.101608	0.292665
Shf	0.440341	-0.138994	-0.0349071	-0.0195152	-0.0925312	-0.18129	-0.121836	-0.0980114	-0.0918389	0.221832	-0.150899	-0.0420986	0.0109666	0.0115065	0.171847	-0.024364	-0.0396825	0.0602236	-0.107525	0.0657753	-0.111146
Whrn	0.438903	0.236311	-0.134349	-0.212047	0.231723	-0.102963	-0.0621263	-0.0475559	-0.0444737	0.216993	0.0218724	-0.233122	-0.100245	0.0644465	-0.027814	0.0583161	0.132595	0.103139	0.00182268	-0.167078	-0.125304
Fen1	0.436921	0.225078	0.26124	0.163299	0.137698	0.128309	0.0166559	-0.0141378	-0.193187	-0.149601	-0.114766	-0.210448	-0.193036	0.0530824	0.0974907	-0.0612192	0.0188791	-0.140842	-0.130422	0.115173	0.153873
Zfp787	0.433628	0.128909	0.215944	0.0222314	0.0925106	0.192153	0.1366	0.117249	-0.2449	0.054144	-0.183734	-0.174172	-0.0500994	0.0605351	-0.233045	-0.0284472	-0.0698813	-0.246513	-0.175329	0.260983	0.0549594
Rtkn	0.433485	-0.200492	-0.0868481	-0.33302	0.144862	-0.316385	-0.131984	-0.106471	0.116738	0.373536	-0.0316851	0.179295	0.286414	-0.149761	0.162018	-0.261077	-0.237187	-0.224619	-0.0198879	-0.11985	-0.0342332
Chtf8	0.433237	0.0283164	0.259685	0.353907	0.00894621	0.114946	0.157284	0.261662	0.0352501	0.136197	-0.412746	0.000604112	0.0351729	-0.137421	-0.252279	-0.0350719	-0.251915	-0.300221	-0.06277	-0.212138	0.187386
Ubr7	0.432475	0.110254	0.138713	-0.197281	0.414836	-0.0638498	0.012539	0.194861	-0.319159	0.0892111	-0.497918	-0.268243	-0.0474235	-0.074224	0.0223136	0.26714	0.0535291	-0.0495202	0.242494	0.0971944	-0.0785961
Tmem144	0.429778	0.0161918	0.232412	-0.0211341	0.341782	0.0983258	0.154329	0.235413	-0.134105	0.00387762	-0.171287	-0.114227	-0.0336018	-0.0803683	-0.00350143	-0.0518162	-0.0864308	-0.130637	-0.128318	-0.122073	-0.0330654
Ganc	0.429409	-0.038228	0.423724	0.192413	-0.0709162	0.0773731	0.357755	0.130777	0.423767	0.252214	-0.0714831	-0.239462	-0.199956	-0.281413	-0.140639	-0.0853441	-0.0942897	-0.17408	-0.254367	-0.198615	0.134998
Rnf180	0.426891	0.266672	0.358462	-0.0519596	0.173974	0.267137	0.146114	0.00288244	-0.14748	0.0215673	-0.00752133	-0.0975605	-0.0995096	0.0249187	-0.104294	-0.107469	-0.202157	-0.189155	-0.0862266	-0.131537	0.318756
Rhobtb3	0.426799	-0.511363	0.383807	0.19459	0.0709551	-0.0202168	-0.164452	-0.192281	-0.0460862	0.174408	0.417714	0.0230741	0.177371	0.184304	0.418706	-0.147352	-0.21711	-0.242744	-0.0106129	-0.339348	-0.449881
Yeats4	0.426038	-0.187019	0.149797	0.103761	-0.153782	0.146088	0.207799	0.135997	0.145777	0.146707	-0.136421	0.184835	0.00847268	-0.341344	-0.248066	-0.193761	-0.359357	-0.273545	-0.253648	-0.0443894	-0.123195
Ifrd2	0.425413	-0.0509421	0.165306	-0.00459769	0.178994	0.231133	0.0418749	-0.00427581	0.173524	-0.20706	0.317908	-0.0173913	-0.0474893	0.0637197	-0.0937716	-0.149426	-0.160099	0.11585	0.131863	0.0472526	-0.17611
Snx16	0.424949	-0.177948	0.37002	0.222524	0.0403982	-0.200674	-0.0219366	-0.0174143	0.0279164	0.110537	0.279489	0.0824008	0.101229	-0.225743	0.22039	-0.350493	-0.241419	-0.0756186	-0.0410217	-0.34362	0.0586942
Mlh3	0.422675	0.0277523	0.0886984	0.118913	0.0791821	0.15121	-0.0178085	0.0569085	0.153826	0.0908362	-0.0817099	-0.138012	-0.153138	0.00212809	-0.017715	0.0180598	-0.0697476	0.023927	0.360356	-0.0824187	-0.148577
1110038F14Rik	0.420836	0.324363	0.18899	-0.0952779	-0.0614267	0.163297	0.250818	0.169881	0.13498	0.10258	0.185753	-0.207275	-0.0242412	-0.103512	-0.280982	-0.157971	-0.16175	0.164852	0.190344	-0.0827407	-0.465597
Stradb	0.420259	0.0325157	0.163743	-0.00534401	0.278575	0.122183	0.130069	0.0539193	-0.150745	0.218394	-0.130616	-0.0982881	-0.0504764	-0.100685	-0.166533	-0.120317	-0.128935	-0.0161521	0.139577	-0.195245	-0.0751289
Klc4	0.418768	0.288611	0.22302	0.0480377	-0.117319	0.170531	0.116543	0.128131	0.27166	0.245976	0.0928114	-0.190233	-0.157987	-0.238685	-0.221386	0.281609	-0.186222	0.116857	-0.00624561	-0.0306085	-0.0600437
Tnk2	0.41838	-0.0285037	0.0354415	-0.0593307	0.340883	0.034871	-0.135079	-0.172705	-0.269598	0.163859	0.133154	-0.0594435	-0.0766966	-0.120116	-0.106027	-0.14539	0.0483701	-0.0550045	-0.0122448	0.10342	-0.283505
Naa40	0.416375	0.0812041	0.335326	-0.0444339	0.112606	0.154741	0.150783	0.25481	0.0826327	-0.0153516	0.0315176	-0.0996104	-0.190654	-0.0259855	-0.159168	-0.113944	-0.139102	0.0181669	-0.178867	0.00841435	0.0220905
Smg8	0.412699	0.0511727	0.305756	0.0135491	0.217456	0.126777	-0.0654208	0.0293022	-0.231629	-0.102901	-0.0390774	-0.107667	-0.0473071	0.276333	0.0244914	-0.0478834	-0.0201956	-0.0419341	-0.0306728	-0.0267267	-0.245428
Lrrc59	0.411355	-0.0304595	0.248826	0.152229	0.244037	0.326124	0.126779	0.0272512	-0.760469	-0.671702	0.138749	0.299472	0.231318	0.3555	-0.179791	-0.0716658	-0.375539	-0.633424	-0.698487	0.0347934	0.213342
Cars	0.408889	-0.196769	0.212305	-0.176174	0.227195	-0.0641959	-0.129879	-0.139695	-0.0990494	-0.391228	0.340997	0.0210729	0.0339635	0.346442	0.288488	0.222449	-0.0119051	-0.277826	-0.204282	0.0404541	-0.190983
Zfp1	0.407999	-0.213048	-0.22104	-0.119991	0.270494	0.158151	0.0523332	0.103832	-0.176625	0.0262616	0.00449817	-0.0915441	0.114843	0.117163	-0.0929959	0.0472444	0.048514	-0.46477	0.0784448	0.0432845	-0.447089
Gca	0.407938	0.0906096	0.39615	0.0893913	0.327955	0.366935	0.315803	0.286847	0.17262	0.121115	0.12847	-0.16028	-0.0381364	-0.219244	-0.264898	-0.242379	-0.217666	-0.289859	-0.281904	-0.106169	0.0618482
Traf3ip2	0.406934	-0.218096	0.306913	0.0803247	-0.110935	-0.191253	-0.0968121	-0.0169901	0.0402579	0.0250422	0.19794	0.144302	0.202934	-0.140479	0.196752	-0.164625	-0.140912	-0.121391	-0.146821	-0.347849	-0.521891
Zfp142	0.406506	0.0277496	0.137148	0.17638	0.0685635	0.282707	-0.118617	-0.117938	-0.246466	-0.0677101	0.238591	-0.123551	-0.0834016	0.0168808	0.255283	-0.217428	-0.0260703	-0.0158051	0.0441167	-0.0571679	-0.0993842
Aagab	0.403225	0.160061	0.348117	-0.132424	0.390143	0.29559	0.264333	0.125606	-0.303404	0.189627	-0.129473	-0.196979	-0.24986	-0.206342	-0.0365133	-0.129436	-0.136861	-0.163108	-0.066845	-0.0845737	0.111133
Fibp	0.403078	-0.23001	0.00609711	-0.0919808	-0.265758	-0.0360612	0.0208084	0.378172	-0.196591	0.238494	-0.109026	-0.0840814	0.0253481	-0.297456	0.0392924	0.246576	-0.119044	-0.0206482	-0.0662102	-0.100991	0.0284478
Tbp	0.399026	0.286616	0.187937	0.041926	0.101857	-0.102441	-0.0701776	0.0186535	0.155658	0.110264	-0.158218	-0.0989037	-0.123647	0.206981	0.143716	0.0236435	-0.109096	0.0748007	-0.13593	-0.0165069	-0.113584
Pikfyve	0.392287	0.155013	0.387885	-0.0461592	0.312848	0.379034	0.028947	-0.0336738	-0.509831	0.104852	0.180407	-0.207693	-0.251389	-0.1618	0.196096	0.29082	-0.102868	0.0559764	0.0700424	-0.174818	-0.274586
Coro7	0.39017	-0.135722	0.0947571	-0.139656	0.17803	0.002917	0.0136345	-0.0743708	-0.101206	0.141691	-0.00413626	-0.0943263	-0.0158143	-0.0485316	0.167604	0.17711	-0.139857	-0.00823944	-0.0407285	-0.0153484	0.378804
Akap10	0.38695	0.0960749	0.121728	-0.0331337	0.0943208	0.120564	0.0819714	-0.000148713	-0.221857	0.214432	-0.14771	-0.0753103	0.0386048	-0.0704926	-0.100573	-0.165502	-0.148475	-0.0604248	0.203016	-0.138361	0.0906791
Hltf	0.386183	-0.168187	0.294919	0.0449913	0.189417	-0.126259	0.0465279	0.143122	0.289734	0.140731	-0.0601448	-0.180016	-0.245996	0.122289	-0.00423936	0.0340428	0.00951175	-0.220945	0.0104032	0.0564569	0.0147412
Setd4	0.38601	-0.0789535	0.0399945	0.151922	-0.106921	0.0311495	0.0300274	0.0956981	0.0546472	0.0131709	-0.0435203	-0.124927	-0.0476286	-0.0493651	0.0729961	-0.0317697	0.0246007	-0.169235	0.0924647	-0.0879073	-0.154019
Gramd4	0.385178	-0.00236223	0.152357	-0.195002	0.166881	0.184971	0.0337203	0.277446	-0.106381	0.204405	0.0798169	-0.132652	-0.218299	0.166493	0.079879	0.207887	-0.142675	-0.142925	-0.169505	-0.0566871	-0.303875
Ahdc1	0.38515	0.0361533	0.0922045	-0.131983	0.274042	0.345092	-0.200606	-0.135896	0.263259	0.276371	0.213117	-0.16861	-0.120656	-0.231092	0.216252	0.00659935	-0.0534694	0.063446	0.191632	-0.0503412	-0.338105
Ccdc115	0.384011	0.224974	0.0161568	-0.209029	-0.0243202	-0.242282	0.282698	0.254689	0.0831003	0.155408	0.0186445	-0.17741	-0.0427224	0.16996	-0.292739	-0.182096	-0.0550998	-0.113983	0.037784	-0.169429	0.0347493
Csrp2bp	0.382326	0.299695	0.234157	0.17024	-0.00974583	0.164011	0.130036	-0.0738863	-0.162955	0.117283	-0.273855	-0.0840238	-0.144609	-0.122272	-0.0819406	-0.235299	-0.129201	0.0754583	0.00282022	-0.105275	-0.0170959
Necap1	0.380789	0.213888	0.0852442	0.245827	0.0647461	-0.111261	0.00518705	0.068483	0.0107297	0.0928601	-0.226817	-0.231862	-0.208205	-0.0609244	0.291352	0.334634	-0.0358053	-0.165611	0.355556	0.00648352	-0.0660926
Ddhd1	0.37434	-0.00375715	0.35047	-0.111715	0.22061	-0.213091	0.217676	-0.119797	-0.171167	-0.0401119	-0.0257372	-0.130645	-0.175529	-0.353189	0.0320418	0.102336	0.141183	-0.20821	0.137761	-0.233321	-0.380149
Cdc25a	0.373139	0.115263	0.0034206	0.021293	-0.00119746	0.0994047	0.300561	0.111062	-0.155388	0.162608	-0.0199363	-0.142737	-0.0858286	-0.309803	-0.17744	0.0214572	-0.0487691	0.00340557	-0.137306	-0.1757	-0.183906
Fam58b	0.372805	-0.089914	0.276884	-0.0767667	-0.0608609	-0.0783221	-0.000243096	0.0105872	-0.081171	-0.0607319	0.0153701	-0.13927	-0.134973	0.0408036	0.352206	0.0142496	0.0591668	-0.172506	0.0216417	-0.127032	-0.131417
Pelp1	0.371799	0.080211	0.211207	-0.311508	0.173706	0.177951	0.0594043	0.0405995	0.068356	0.0865377	0.0172243	-0.0554349	-0.114245	0.113879	-0.00270668	0.0961845	-0.115315	0.0325494	0.0711128	-0.284069	-0.124166
Synj2	0.370936	-0.0388162	0.192547	-0.145549	0.214298	-0.0515397	-0.000109608	0.134141	-0.0673555	0.112354	-0.197755	-0.200591	-0.0992647	-0.189778	-0.0699806	-0.0279849	0.128933	0.148562	0.116752	-0.13156	-0.089302
Tmem62	0.369045	0.0166406	0.179629	0.00720643	0.275434	0.0997802	0.183286	0.319656	-0.243709	0.0205702	-0.157456	-0.133738	-0.0330108	0.0391944	-0.0778584	-0.164825	-0.0562408	-0.144553	-0.0623824	-0.158345	-0.208778
Fbxl15	0.367594	-0.0595033	0.313813	0.173222	0.184652	0.250322	0.306191	0.104124	-0.517737	0.0653941	-0.489432	-0.291561	-0.287955	0.0433343	-0.0383169	-0.051012	0.0990897	-0.209655	-0.170049	-0.123849	-0.24803
Rfwd3	0.364177	-0.15008	0.219696	0.153665	0.243272	0.110814	0.126987	0.0713946	-0.208164	0.0407754	0.229543	-0.0971449	-0.0785315	0.0128714	-0.169466	0.18046	-0.156987	-0.0841064	0.0562147	-0.0550778	0.0378749
Zmat1	0.363682	-0.0844565	0.157739	0.0800405	0.122216	0.0555358	0.00261542	0.0853942	-0.222305	0.162162	-0.00962946	-0.166659	-0.102723	-0.0747199	-0.079392	-0.0223648	0.038412	-0.199233	0.173214	0.0226643	-0.149291
Tfe3	0.361345	-0.187184	-0.149575	-0.177727	0.152616	-0.11152	-0.168892	-0.135942	-0.213288	-0.232893	-0.0273609	0.189145	0.152505	0.204508	0.176177	0.251589	-0.0866774	-0.209861	0.0923514	-0.168345	-0.0754929
Calcoco1	0.361033	-0.13512	-0.236971	-0.0997867	-0.200289	-0.0918963	-0.0781021	-0.139573	-0.141588	0.144911	-0.135044	-0.222967	-0.0998884	0.0615423	0.125267	0.146245	0.232208	0.152115	0.351996	-0.315066	-0.223946
Acad9	0.357424	-0.22029	-0.132353	-0.0345339	0.0117074	-0.0983562	-0.0713883	-0.138629	-0.152575	0.0427479	0.134608	0.11647	-0.0226702	0.162079	-0.0671145	-0.0525827	-0.0566461	-0.0947303	0.00442451	-0.0867725	0.0245038
Ermard	0.35619	0.0966444	0.143307	-0.0290876	0.0991783	0.0592502	0.113676	0.0639208	0.0941438	0.172886	-0.0450995	-0.144411	-0.180588	-0.0295723	-0.163452	0.253439	-0.0754736	-0.0035673	-0.0715006	-0.00190602	-0.00463274
D3Ertd751e	0.355899	0.0765106	0.0480762	0.265443	0.207635	0.0986567	0.305895	0.0118481	0.0744027	0.0304355	0.0981337	-0.173117	-0.179038	-0.231199	-0.101649	-0.171161	-0.0345934	-0.0775477	-0.0196256	-0.0576358	-0.198637
Qrsl1	0.354679	-0.171286	-0.016823	0.0441694	0.220467	0.161897	0.0917336	0.126436	-0.211028	0.285999	-0.0786649	-0.11657	-0.134529	-0.219991	-0.0530613	-0.102178	-0.0871714	0.0602865	0.0272249	-0.0681077	-0.0876357
Alg13	0.353798	-0.193983	-0.0473828	0.0379855	-0.0670295	-0.0521935	0.115908	-0.00572173	0.0121557	-0.128104	0.194636	0.0394315	0.0509585	-0.0464605	0.155612	-0.0694814	-0.0904707	-0.203124	-0.167844	-0.0901782	0.00464294
Nagpa	0.350801	-0.19028	-0.0470359	-0.145311	-0.146181	0.19004	0.0207324	0.0711663	0.22896	-0.0415173	-0.00632349	-0.20909	-0.10365	-0.132628	-0.0120972	0.252662	0.0900415	-0.0692417	0.218945	0.212583	0.0267962
Ftsj1	0.350688	0.141387	-0.0390445	-0.124962	-0.0631113	-0.12676	-0.0756214	0.0622643	0.0876235	0.159075	-0.114901	-0.222075	-0.151458	-0.0724446	0.099163	0.0499738	0.159456	0.192049	-0.0322428	-0.091306	-0.144734
Helz	0.348977	0.206893	0.158763	0.194047	0.150705	0.170608	0.0502728	0.123543	-0.242587	-0.132685	0.0240984	-0.109645	-0.0252017	-0.182223	-0.076517	0.243194	0.0228449	-0.192905	-0.0257559	-0.0188954	-0.366542
Tbc1d2	0.348116	0.0135935	-0.0609934	-0.111417	0.323357	0.295754	0.20006	-0.0557244	0.193876	0.320819	0.0069509	-0.0053307	0.0143775	-0.148051	-0.154982	-0.199064	-0.233271	-0.167699	-0.162119	-0.0550416	-0.16939
Msh3	0.342502	0.00229528	0.275566	0.221961	0.282212	0.226944	0.0276324	0.054013	-0.208894	-0.0665013	-0.0265098	-0.0420551	-0.0210978	0.0446558	-0.0789327	-0.303236	-0.0741949	-0.0920772	0.0258819	-0.182504	-0.0643422
Noc4l	0.338485	-0.069187	0.150298	-0.146791	-0.0990635	-0.198881	-0.18788	-0.112773	-0.338752	-0.0749671	-0.301622	0.0145876	-0.00117101	0.258387	0.145276	-0.240355	0.0791823	0.0192432	0.184806	-0.0117187	-0.138185
Eny2	0.33709	-0.182453	0.256385	0.0627413	-0.0599548	0.000590679	0.186038	0.186492	0.167189	-0.460234	-0.0704578	-0.172717	-0.0728415	0.277214	-0.171811	0.0475133	0.194074	0.214475	-0.122133	-0.283415	-0.781142
Fam185a	0.334917	-0.249302	0.104666	-0.0483784	0.250539	-0.026106	0.025348	-0.0821953	-0.139636	-0.161595	0.150225	0.0993785	-0.0153853	-0.0173029	-0.0182643	-0.131769	-0.0460409	0.0431257	-0.113328	-0.132718	-0.175084
Pno1	0.327285	-0.0325924	0.306291	-0.388378	0.0556129	-0.424751	0.223941	0.310352	0.211058	0.0457006	-0.440308	0.155726	0.0684782	0.275556	-0.379449	-0.395371	-0.140562	0.0147733	-0.28764	-0.342478	-0.584237
Atg4c	0.325573	0.0445049	-0.108107	0.102414	0.318994	-0.00179992	0.131653	0.230703	0.257875	-0.00216958	-0.0664702	-0.132709	-0.134827	-0.018605	-0.139331	-0.0469257	-0.00856847	-0.131565	0.180473	-0.0378592	-0.142288
Nfatc3	0.324013	0.177414	0.10206	0.0707888	0.149634	-0.0169782	-0.0186381	0.1564	-0.316903	0.221989	-0.30417	-0.159901	-0.193744	-0.148717	0.0199606	0.0537777	-0.121934	0.18933	0.258482	0.0420116	0.145041
Kptn	0.323382	0.0897578	0.00253742	0.202983	0.134881	0.126213	-0.0119104	0.147629	0.0936529	-0.0529849	0.0262719	-0.0820184	-0.0280141	-0.142594	-0.0398716	-0.115829	-0.0719249	0.0560953	0.224006	0.00864629	-0.0953352
Bloc1s4	0.318764	-0.0411276	0.0840044	-0.266186	-0.070318	-0.0870574	-0.0331762	-0.0134961	-0.077257	-0.0659836	0.235324	-0.0227146	0.265396	0.147877	0.228872	-0.230996	-0.0609899	-0.378841	-0.266044	0.208918	-0.069095
Pank4	0.318673	-0.1138	0.0524078	-0.00413654	-0.0908173	-0.00690099	0.164367	0.0120307	-0.156822	0.109871	-0.122679	-0.102565	-0.124913	-0.0199459	-0.130196	0.0588211	-0.0186689	0.00649025	0.1693	-0.0564333	-0.139956
Rab40b	0.31796	-0.246987	0.151107	0.0338969	0.142209	0.00173144	0.153973	0.231366	-0.0788905	-0.119714	-0.105554	-0.272887	-0.186078	-0.088489	-0.0792269	-0.12179	0.24744	0.107189	0.186702	-0.275831	-0.248311
Pih1d1	0.31541	-0.00120136	0.258549	0.0933414	0.159456	0.166957	0.196266	0.241003	-0.236707	0.155358	-0.107946	-0.140035	0.0380463	-0.284021	-0.138258	-0.190788	-0.165804	-0.0685075	-0.107307	0.00317096	0.186159
Ccdc181	0.314516	0.150452	0.0855472	-0.00512869	-0.131606	-0.0506528	0.0753862	0.0395431	0.244442	0.15696	-0.193743	-0.165751	-0.0763964	-0.226466	-0.125479	-0.0724186	0.00870611	0.265036	0.161593	-0.0770921	-0.19099
Zc3h18	0.313224	0.140808	0.0948314	0.0342202	0.130791	0.130223	-0.0257949	0.0323415	-0.206569	-0.0692741	0.00190354	0.0292418	-0.0474434	-0.118836	-0.0160599	-0.0937329	-0.0955142	-0.309785	0.0608767	0.242897	-0.172792
Homer3	0.312892	-0.238094	0.0729105	-0.239992	-0.242522	-0.310902	-0.170672	-0.139408	-0.167457	0.00716429	0.249078	0.142407	0.142521	-0.0544556	0.310861	0.0809227	-0.143448	0.0302348	-0.115	0.0204141	-0.113736
Zfp180	0.312569	0.00870636	0.14066	0.0318274	0.115839	-0.0413433	-0.0851266	-0.122387	-0.251484	0.105689	-0.122504	-0.00459512	-0.0681433	0.195658	0.0885518	-0.156969	-0.0738819	0.0818934	0.0112316	-0.0112759	-0.249502
Setdb1	0.309965	-0.218586	-0.101573	0.0764522	0.194741	0.0910775	0.00945692	0.271457	-0.0529283	0.122873	0.0793464	-0.0426102	-0.106494	-0.0894882	-0.0253671	-2.18977e-05	-0.0823435	-0.0972299	0.141359	-0.159146	0.0752446
Zdhhc3	0.309324	-0.0452701	0.0808087	0.0140577	0.215508	0.229099	0.22387	-0.0253119	0.106702	0.202374	-0.0383772	-0.186195	-0.0709173	0.00986382	0.0420784	-0.0475963	-0.0948566	0.0339301	-0.178439	-0.101536	-0.337268
Snx27	0.307465	-0.240466	0.174674	-0.267539	0.0580506	-0.18937	-0.224621	0.000816849	-0.0903813	0.229875	-0.056427	-0.150547	-0.113344	0.220094	0.224301	-0.122464	0.0690455	0.0591538	0.0156177	0.0775113	0.136404
Atic	0.307254	0.0574191	-0.352325	0.0643691	-0.0981202	-0.23408	-0.182294	-0.107325	-0.0822983	0.0316981	0.184646	0.0677159	-0.0522259	0.0486642	0.089978	0.27288	0.00569987	0.0578244	-0.0555975	-0.12219	-0.173951
Snupn	0.305604	0.233792	0.212472	0.0677322	-0.015791	0.132764	0.0230766	0.219594	0.0582408	0.144051	-0.0205139	-0.0494122	-0.123454	-0.0832098	-0.0643542	-0.219392	-0.147533	-0.0620167	0.0735309	-0.0718858	-0.0535866
Hinfp	0.305229	-0.0672539	0.219806	0.15922	0.0404927	0.176525	0.172367	0.0475836	0.144876	0.0345892	-0.160917	-0.068501	-0.137878	-0.0660147	-0.191697	-0.166537	-0.0732953	-0.089015	0.0379399	-0.0655441	0.0742923
Dstyk	0.305023	-0.146512	0.246841	-0.0730426	0.162903	-0.00946385	-0.149238	-0.0181308	-0.371031	0.0492353	-0.228177	-0.161797	-0.151742	0.0362135	0.199493	0.0748304	0.0434307	0.12949	0.212706	0.234926	-0.348953
Nudcd1	0.300557	0.0702543	0.275117	0.00564961	-0.0603156	0.165112	0.037515	0.270109	-0.288245	-0.00713733	0.0355462	-0.157523	0.00703869	0.185004	-0.122735	0.0963956	-0.101847	-0.141747	0.180365	0.00913434	-0.187184
Cops7b	0.29353	0.144488	0.203063	-0.00205268	0.236483	0.047302	-6.2529e-06	0.181805	0.0441206	0.120633	0.202879	-0.057204	-0.126614	0.202322	-0.0322328	-0.173001	-0.111206	0.0023277	-0.060186	-0.236157	-0.180983
Naa16	0.290605	0.0797402	0.290202	0.0105636	-0.131254	-0.126949	-0.120102	-0.0486061	-0.344419	-0.198373	0.106586	-0.186769	-0.0407921	0.23552	0.244375	0.00324013	0.0512692	-0.109606	-0.057673	0.255696	0.175209
Nol6	0.289277	0.174543	0.0310309	-0.0249476	0.154174	-0.000746316	0.0325769	0.174707	-0.23963	-0.0595452	-0.00319517	0.011424	-0.0490847	-0.0725758	-0.00175434	0.0107635	-0.10317	0.0187575	0.109824	-0.0720361	-0.266394
Slc35a4	0.2891	-0.0994871	0.111131	-0.182043	0.0192119	-0.109384	-0.011234	0.0380139	-0.699207	-0.0149318	0.155656	-0.122761	0.182105	-0.0235069	0.0140847	-0.147652	0.124664	-0.163788	0.0444579	0.0493468	-0.233522
Fbxo25	0.287984	-0.0874412	0.182505	-0.126693	0.284298	-0.148227	0.088462	-0.00310346	-0.192905	0.228855	0.0272637	-0.183985	-0.062809	-0.0880919	0.133659	-0.045783	-0.0507591	0.0776583	0.277129	-0.112559	-0.105797
Tom1	0.284999	0.177727	0.0401746	-0.224659	-0.0342304	0.0346904	-0.00213529	-0.074689	-0.0017252	0.27088	-0.00470262	-0.120309	-0.017061	0.0346215	0.084623	-0.0576411	-0.0569541	0.00181486	-0.0594081	-0.125721	0.200898
Lrif1	0.284872	0.216294	0.104787	0.186994	0.244783	-0.0703416	0.255912	0.0787447	-0.175265	0.0460487	-0.331348	-0.0733667	0.00725489	-0.115069	-0.230963	-0.18563	0.0322524	-0.301848	0.136266	-0.186026	-0.610282
Map2k5	0.281509	-0.238102	-0.135013	0.129319	-0.0630358	-0.118992	0.0930236	0.103526	-0.325922	-0.0008496	0.0920239	0.00672105	0.000650405	-0.281084	0.128373	-0.05189	-0.038018	0.036085	-0.0827795	-0.128929	-0.133536
Prickle3	0.278342	0.128653	-0.0437443	0.0824743	-0.113848	-0.024309	-0.034791	0.0950541	0.169412	0.0506914	0.129295	0.0386116	0.041783	-0.103853	-0.0647306	-0.082798	-0.0897931	-0.0886513	-0.0304804	-0.036011	-0.117441
Chd1l	0.276627	0.105279	0.122606	0.0528732	-0.0489648	0.115006	0.0616762	0.0523027	-0.156107	-0.102048	-0.0452501	-0.135539	-0.224123	-0.102217	0.128898	-0.0387168	0.0766858	-0.182654	0.0852156	0.00622455	-0.0148491
Cinp	0.273925	-0.167958	0.222236	-0.026394	-0.0963972	-0.0815092	0.169494	0.0300871	0.00181708	-0.0562226	-0.342673	-0.0793672	-0.0381998	-0.191049	-0.148362	-0.0557307	0.0439614	0.137338	0.0535928	0.0663479	-0.483569
Gemin6	0.273829	0.00161771	-0.000633218	0.230484	0.0133298	0.0876354	0.0683298	0.211897	-0.229467	0.0167624	-0.199448	-0.0588247	-0.0322237	-0.237995	-0.138718	0.0492378	-0.0684459	0.0448459	-0.0397402	0.0208725	0.0579361
Aqr	0.272132	-0.16097	-0.14149	-0.112074	0.0845983	-0.170345	-0.165347	-0.223553	-0.10492	-0.0562759	0.211812	0.109397	0.0789187	0.174484	0.0374917	0.246069	-0.0496613	-0.244418	0.0350354	0.179767	-0.0757951
Dyrk1b	0.270693	0.228181	-0.0793774	-0.0643775	0.00498973	0.104601	0.105442	0.180825	-0.130293	0.0680971	-0.0619982	-0.052477	-0.12798	-0.0770603	-0.0671876	-0.145764	-0.0864608	0.0328813	0.0515276	-0.0321351	-0.0532644
Cdan1	0.26341	-0.150364	0.00538833	-0.041569	-0.0417641	-0.075378	-0.0218814	-0.0436806	-0.223448	-0.089132	-0.040746	-0.0872566	0.00893521	-0.117244	0.237158	0.16441	0.0752514	-0.0594952	0.0999857	-0.0135696	-0.0475925
Prep	0.263108	0.014721	-0.115195	-0.210043	0.0202256	-0.182315	-0.026692	0.043349	-0.321667	0.00458779	0.0439573	0.0860333	0.0641037	0.163329	-0.213775	-0.171983	-0.0326184	-0.0164103	0.140865	-0.0481024	-0.14181
Senp3	0.260478	-0.207628	0.0351741	-0.305597	-0.261322	-0.0852383	-0.0874654	-0.0200128	-0.495434	0.150116	0.025934	0.0105439	-0.0928081	0.116354	0.0410614	0.19037	-0.0617809	0.146857	0.0553056	0.0732778	-0.244592
Zfp316	0.256655	0.214854	0.168817	0.0115112	-0.114595	-0.102217	0.0789595	0.113715	-0.0999351	0.139314	0.1141	-0.0477946	-0.0221163	-0.105607	-0.0723519	0.0612746	-0.121534	-0.0290744	-0.0363296	-0.0704315	-0.106428
Zfp410	0.255721	0.135016	0.161092	0.092721	0.0577456	-0.050906	0.0352914	0.0934267	-0.250376	-0.206512	0.0505615	-0.0451229	0.0850664	0.0675471	0.0232611	0.0556504	0.0164727	-0.299961	-0.0213365	0.0208427	-0.0274226
Plcxd2	0.255078	-0.140926	0.0048004	-0.164192	0.0211201	0.0290947	-0.165916	-0.192451	-0.181212	-0.16046	0.199548	0.110997	0.0905519	-0.14119	0.0704244	-0.109345	-0.0842482	-0.0881795	0.19806	0.18239	0.173996
Crtc1	0.252573	0.248761	0.0201894	-0.150629	0.2277	-0.0806564	-0.138376	-0.091732	-0.188543	0.0748604	0.0833199	-0.0304815	0.00958581	0.0159697	0.100906	-0.235289	-0.0450774	0.125264	0.125446	0.0490559	-0.206764
Msh2	0.249554	0.0587749	-0.0781458	0.244435	-0.10565	0.05389	0.0387576	0.0357469	0.0481022	0.0304561	-0.119827	-0.0297207	-0.188279	-0.0720258	-0.214006	-0.124445	0.0031753	0.042471	0.240285	-0.0790634	-0.0675413
Eml3	0.245435	0.153581	0.0906666	-0.0194774	-0.0114233	-0.135681	0.0327652	0.0674161	-0.192577	0.139873	0.0857436	-0.00754534	-0.159772	-0.031723	0.0881515	0.109621	-0.0821721	-0.0581422	-0.134778	-0.142117	-0.100915
Wdr4	0.244488	0.0175677	0.132396	0.12534	0.0317392	0.0148593	-0.0474752	-0.112264	-0.330028	-0.132973	-0.0250501	0.119691	0.0834555	0.156852	0.0579107	-0.0947018	-0.158071	-0.050818	0.0997709	-0.066156	-0.14867
Cand2	0.235591	-0.0984137	-0.0664713	0.0669031	0.0145488	-0.0454874	-0.0499584	-0.12102	0.0944934	-0.0419748	0.111728	-0.0131258	-0.0985469	0.0126997	0.168972	-0.0356258	-0.018448	0.198257	0.0716474	-0.10075	-0.117918
Ccdc22	0.231294	-0.0206457	-0.13463	-0.171673	-0.125574	0.105599	-0.0534685	-0.0322315	-0.158543	0.0691988	-0.0836685	-0.0759586	-0.0869202	0.0972041	-0.136337	0.184297	-0.00535653	0.109566	0.112464	0.126179	0.189545
Zbtb22	0.227906	-0.228375	-0.000564179	-0.332573	0.0961813	0.046143	0.0496313	-0.112534	-0.362886	0.00305711	-0.138469	0.166054	0.136917	-0.061028	0.047622	-0.152308	-0.210275	-0.146268	0.112567	-0.0500257	0.121658
Arfrp1	0.223663	-0.196005	0.0810647	-0.244797	0.134445	-0.0571781	0.0222805	0.0172447	-0.0373939	-0.0866275	0.190416	0.216329	0.0830016	-0.0132601	-0.261287	-0.0540219	-0.306615	0.00178709	0.0698441	0.2179	-0.0196433
Cep135	0.200249	-0.0148515	0.162329	-0.162631	0.12483	0.0433361	0.103762	-0.0236228	-0.144707	-0.0575989	0.162005	-0.045561	-0.0685453	0.0200577	-0.0877768	-0.153886	-0.0180647	-0.0568043	-0.00223144	0.00107662	0.175201
Camkmt	0.19893	-0.0757188	-0.0584025	-0.11609	-0.108513	-0.0250008	-0.0233765	0.0445084	0.13385	0.0808949	0.132308	-0.0343078	-0.0357054	-0.0403568	0.169513	0.0349243	-0.0384756	0.0254234	-0.0820109	-0.0148376	-0.0421459
Spata1	0.197919	-0.158564	-0.0918672	-0.0298915	0.0596458	0.0487838	0.0527727	0.105676	0.157006	-0.0037227	-0.153819	-0.0524547	-0.0148781	0.108677	-0.1002	-0.0408336	0.0531198	-0.0443327	-0.046438	-0.0315178	-0.119339
Mrps27	0.197834	-0.0628842	0.1461	-0.159644	0.17584	-0.00892291	0.119885	0.179168	-0.188409	-0.0515826	-0.103945	-0.105224	-0.088519	0.0211733	0.00603097	-0.0939247	-0.0545032	0.0798501	0.0707423	0.0634362	0.162736
Sugct	0.182664	0.127083	0.00729633	0.0485691	0.0714373	0.0490182	0.159903	0.051871	-0.0989981	0.0979737	-0.121289	-0.0706308	-0.0441723	0.0673872	-0.110191	0.0544794	-0.0631734	-0.08159	-0.0448984	-0.0858682	-0.114607
Pik3cb	0.171808	-0.00918265	-0.0336214	0.0793815	0.0968605	0.0342248	0.158868	0.118448	0.0432916	-0.0609446	-0.127019	-0.0135149	-0.0400646	-0.142873	-0.121581	-0.00930676	-0.0796984	-0.0925927	0.0865037	0.0189474	0.153681
Zc3h8	0.161992	-0.00258353	0.152085	-0.0951164	-0.133806	-0.0805517	0.0466528	-0.0319279	0.0520658	-0.0189502	0.124913	0.052362	-0.0776441	-0.014888	-0.0954473	-0.055637	-0.0547873	0.0590458	-0.123624	-1.8753e-05	-0.042566
Rnf126	0.154971	-0.216683	0.0188062	0.018149	0.0283022	-0.213135	-0.00415366	0.037445	0.0107979	0.0899128	-0.0895732	0.069687	-0.0315656	-0.0824076	0.142798	0.0418369	-0.0640183	-0.159065	0.000155666	0.0432869	-0.453015
Smyd5	0.148799	-0.102103	-0.0472633	0.105462	0.0863039	0.0343336	0.0770731	0.0479052	0.101708	0.0316057	-0.0174886	-0.0196243	-0.00958559	-0.0738853	-0.122752	-0.0643043	-0.034254	0.0451168	0.102654	-0.0860539	-0.166708
Bcorl1	0.129321	-0.10242	-0.0314117	0.00884126	0.00906476	0.120364	-0.0857968	-0.0313953	-0.133183	0.07907	0.043569	0.0218132	0.0396668	-0.0754848	-0.0358627	-0.0733787	-0.00896884	-0.0119702	-0.0616377	0.0939269	-0.15091
Dtwd2	0.125226	0.014707	-0.151634	0.0408892	-0.143451	-0.006374	-0.0434446	0.0970531	-0.0898937	-0.0846288	-0.0537021	-0.0772408	0.0116886	0.0417411	0.0663333	-0.0120617	0.0920408	0.0197546	0.0370799	0.0173474	-0.115852
Lcn5	0.0447932	6.01134	-1.73272	-0.25269	-3.38072	0.0903392	0.501226	0.190547	-0.140193	-1.57572	-3.94844	-1.77705	-1.57071	-0.366645	-0.324945	-2.64298	-3.02998	-0.178733	-0.303206	-1.14778	-0.825652
Spag11a	-0.277632	5.9436	-1.5165	1.21459	-2.31948	1.13273	0.081435	-0.0764945	-0.0717077	-2.53268	-3.70898	-2.07091	-2.20246	-0.242159	-0.151172	-3.1291	-3.24123	-0.282891	-0.351318	-1.09086	-0.988912
Defb30	-0.218715	5.92454	-1.77621	-0.135958	-2.8137	-0.030843	1.44702	1.69857	1.86696	-1.65824	-3.99169	-2.34914	-2.20957	-1.77479	-1.58764	-2.77027	-3.19494	-1.21051	-1.34154	-2.19417	-1.68786
Gm6792	-0.568374	5.7025	-0.941899	-0.111465	-3.30165	-0.0122276	0.0304215	-0.0214838	-0.0201176	-1.62539	-4.66788	-1.62023	-1.30047	-0.0932489	-0.0235339	-2.83718	-2.39953	-0.0186995	-0.0768523	-0.961715	-0.538299
Spink11	0.348827	5.62756	-1.33971	0.174942	-2.57679	1.00868	1.58803	0.708069	-0.19942	-1.01096	-4.19143	-2.64779	-2.17353	-1.40112	-1.3492	-2.89047	-3.51799	-0.518839	-1.13173	-1.58734	-1.65543
Defb21	-0.588358	5.45703	-0.943006	-0.0710384	-3.77263	0.185002	-0.00402565	-0.00280455	-0.00262482	-1.04083	-2.0311	-1.26917	-1.1221	-0.0866152	-0.0618254	-1.58895	-1.77234	-0.0167544	-0.0622909	-0.836368	-0.484895
Defb42	2.65932	4.44866	-0.153566	-0.171061	-0.432484	0.67321	2.08911	1.66991	1.75518	-1.9948	-3.12281	-3.36044	-2.77492	-2.77257	-2.87081	-3.31811	-3.49269	-2.68359	-2.26544	-2.72722	-2.64982
Clu	1.30206	4.39993	-1.36025	-1.563	-1.47239	3.98768	-0.895777	-1.31376	-2.17871	-1.69931	0.547944	-0.617487	-0.949989	-3.49134	-3.9057	-4.79649	-5.33077	-4.41716	-3.94918	-3.0404	-4.73038
Muc15	2.60369	4.36455	-1.43699	-0.0276477	-1.4263	-0.0387988	-0.0430403	-0.0372651	-0.0349416	-1.1665	-1.68188	-1.25211	-1.0128	-0.105379	0.0109671	-1.40934	-1.65683	-0.0315723	-0.0717826	-0.883044	-0.328069
Defb23	-2.86003	4.31266	1.3207	-0.0434991	1.10877	0.0380036	0.096576	-0.0359292	-0.0336673	-1.43377	-3.49337	-1.60506	-1.32091	-0.137144	-0.110596	-2.44825	-2.25425	0.0144159	-0.102847	-0.887831	-0.576078
Rnase9	-0.514546	4.27343	-0.0943758	0.550881	1.13414	1.74726	-0.186218	-0.0434531	-0.125003	-3.28964	-4.04408	-2.51428	-2.47134	-0.319133	-0.263697	-3.55129	-3.87571	-0.379541	-0.530192	-1.3332	-1.2438
Serpina1f	-1.27193	4.12251	-0.021911	-0.486903	2.27337	3.37548	1.29771	1.424	0.963512	-3.32084	-3.97445	-4.22687	-4.04793	-4.58378	-4.49815	-4.80577	-4.41517	-4.6338	-4.08356	-4.25768	-4.25343
BC048679	-2.74086	3.96049	1.70054	0.464658	0.901257	-0.258737	-0.0306336	-0.00483623	-0.00453089	-1.14742	-2.25908	-1.52294	-1.42843	-0.117247	-0.0124163	-1.75666	-2.13994	-0.0398594	-0.071866	-0.748469	-0.669247
Defb39	-0.865696	3.95147	1.00117	1.23308	0.724328	0.90706	0.0426863	-0.0274874	-0.0257563	-1.92621	-2.99922	-2.04634	-1.88901	-0.184214	-0.138628	-1.9244	-2.69269	-0.240679	-0.187279	-1.22839	-0.969975
C4bp	0.606371	3.89195	-0.73135	-0.022587	1.91032	0.602124	0.448132	1.03656	0.730069	-1.88133	-3.93534	-2.04812	-1.72325	-0.513548	-0.510268	-2.43149	-2.66473	-0.473034	-0.530956	-1.48898	-1.06562
AY761185	-0.477698	3.87814	1.12312	1.29063	0.555697	1.00196	-0.200698	-0.166607	-0.17953	-2.93731	-3.53423	-2.7377	-2.84688	-0.301707	-0.233953	-3.39992	-4.02592	-0.446252	-0.480553	-1.78574	-1.22851
Agt	-0.56609	3.82978	0.695986	-0.0854289	-0.373762	-0.0327987	-0.249673	-0.207484	-0.195076	-0.934159	-1.20523	-0.930132	-0.82417	0.24423	0.631802	-1.04553	-1.12487	-0.0657342	-0.21566	-0.61529	-0.45007
Spink12	1.69423	3.74427	-0.038295	0.686297	-1.16186	1.14174	-0.0149606	-0.0195543	-0.0353739	-1.86812	-1.4606	-1.54082	-1.3016	-0.0611288	-0.0720932	-0.971975	-1.87588	-0.109271	-0.0667963	-0.757192	-0.688237
Muc5b	0.137738	3.55351	-0.868913	-0.0260118	-0.699615	-0.0120875	-0.00482528	0	0	-0.570478	-0.93221	-0.59505	-0.456804	-0.0355032	-0.026593	-0.718019	-0.721644	-4.23819e-17	-0.0186971	-0.389609	-0.216508
Gm6040	0.389608	3.45558	1.00139	1.02107	0.0697003	0.338974	0.0433366	-0.0434414	-0.0407319	-0.820928	-1.31899	-0.978368	-0.924617	-0.118953	-0.110521	-1.22265	-1.3356	-0.124548	-0.160409	-0.61098	-0.538412
St6gal1	1.01801	3.43378	-0.781967	-0.0279055	-1.119	0.113026	-0.122501	-0.15998	-0.150354	0.431015	-1.12767	-0.84454	-0.618678	-0.131082	-0.205863	-0.537174	-0.934559	-0.165796	0.074963	-0.174938	0.0718744
Ace	0.994241	3.42263	-0.469745	-0.073928	0.381607	0.240287	-0.470601	-0.252412	-0.515514	-0.905839	-1.03554	-0.988917	-0.935786	1.80481	0.505248	-0.20417	-1.11317	-0.496896	-0.522536	-0.597581	-0.440482
Ido1	1.48086	3.38575	-0.227849	0.567587	-0.634275	1.32956	-0.0353529	-0.0918352	0.337404	-1.11424	-0.944522	-1.06044	-0.851996	-0.0879728	-0.109509	-0.963676	-1.25308	-0.221682	-0.249519	-0.627816	-0.389597
Spink2	1.54871	3.348	-0.0374798	0.334625	-0.0120903	0.0973886	-0.00899719	-0.0283762	-0.0265775	-0.996324	-1.76158	-1.07625	-0.860611	-8.19281e-05	-0.0298864	-0.898168	-1.17922	-0.0635266	0.041982	-0.736932	-0.414912
Crip1	2.81401	3.12662	0.115712	1.18918	-2.0343	0.462887	2.57706	1.49484	0.853614	-1.01263	-2.55984	-4.14596	-3.72142	-2.32431	-2.56082	-1.61942	-2.51062	-5.69039	-3.45674	-1.68955	-1.09117
Mbnl3	0.595131	3.11005	-0.0499255	-0.146649	0.38189	0.25824	0.0449902	-0.0621422	-0.106362	-0.424317	-0.388543	-0.5231	-0.169539	-0.153467	-0.155651	-0.933736	-0.873648	-0.0940911	-0.152558	-0.52415	-0.287906
Defb29	0.682281	3.08469	1.30688	-0.052749	-0.0660349	-0.00225508	0.0392446	-0.0157036	-0.0147104	-1.1773	-2.04165	-1.12089	-1.01345	0.073949	-0.0734592	-1.57903	-1.62358	-0.0229142	0.0612744	-0.711624	-0.470237
Enpp1	0.738089	3.05707	0.340854	-0.0767339	1.29546	1.77232	-0.172752	-0.173456	-0.162989	-0.838963	-1.16193	-0.962486	-0.845831	0.163001	-0.0406494	-0.965709	-1.3424	-0.308871	-0.132574	-0.802225	-0.470472
Pemt	1.31928	3.0351	-0.158078	-0.153954	0.1528	0.231235	0.113253	-0.0924275	-0.213933	-0.405117	-0.917456	-0.697139	-0.257032	0.0527445	-0.0668928	-0.657304	-0.93128	0.116096	-0.197091	-0.66041	-0.377561
Rprml	-0.0810219	2.88704	-0.335116	0.412505	-0.235315	0.00865783	-0.0911528	-0.28544	0.0158748	-0.649685	-0.738458	-0.432228	-0.294478	0.809965	0.209884	-0.422907	-0.325666	-0.296747	-0.385064	-0.536749	-0.39333
Gc	0.46106	2.84678	-0.0737885	-0.0186815	-0.935271	0.0822316	-0.00319113	0	0	-0.46315	-0.115259	-0.505103	-0.369693	-0.0269689	-0.0236542	-0.561514	-0.587686	-1.8326e-17	-0.0162883	-0.1792	-0.128257
Wfdc8	1.13549	2.79273	0.0676328	0.591642	0.854341	1.66648	-0.0718495	-0.129045	-0.121161	-0.757633	-1.10221	-0.825522	-0.802149	-0.201787	-0.199139	-0.954626	-1.24235	-0.29143	-0.23191	-0.566179	-0.625573
Plac8	0.632998	2.67424	-0.0212266	-0.979565	-1.39252	-0.428047	2.32617	1.78994	0.986258	-0.161665	-1.81623	-2.62865	-2.14692	-2.30847	-2.29802	-1.10874	-0.338315	-4.17751	-3.50138	-2.30127	-0.924948
Sin3b	-0.0971595	2.63621	1.14418	1.27126	0.573682	0.704321	0.273429	0.96184	-0.343963	-0.862676	-1.18318	-0.563649	-0.574653	-0.271611	-0.747789	-1.20952	-1.0108	-0.475103	-0.395634	-0.658932	-0.0406534
Pla2g7	-0.419317	2.60298	-0.831852	-0.259863	-0.454712	-0.106361	-0.121644	0.566276	0.313994	-0.630197	1.16616	0.133988	0.229626	0.667544	-1.03551	-0.317299	-1.01296	-1.04735	-1.08515	-0.6625	1.88763
Rhcg	2.32068	2.47896	-0.152145	-0.0287399	0.194876	-0.0225054	0.00403531	-0.00167399	-0.0015682	-0.339984	-1.12151	-0.75889	-0.422029	-0.0314251	-0.0252336	-0.472876	-0.840285	-0.00364149	-0.0175977	-0.34858	-0.222158
Akr7a5	1.57731	2.40654	1.32668	1.22916	1.07822	1.07688	1.38278	1.18843	0.869196	-0.763275	-1.25411	-1.72031	-1.50587	-1.24152	-0.91022	-1.23156	-1.56623	-1.12103	-0.6089	-1.50372	-1.42485
Cldn7	1.7193	2.36601	0.798968	-0.131624	1.23614	1.51546	1.65353	1.446	0.448392	0.0628799	0.124173	-0.796846	-0.583417	-2.61502	-2.52731	-3.1148	-3.08786	-2.79711	-2.59689	-2.47079	-2.51469
Cited1	0.508581	2.36078	-0.239274	0.506884	-0.568593	1.20523	2.1107	2.21482	0.69643	-1.10993	-1.00606	-1.78322	-1.645	-3.30602	-3.81102	-1.59465	-1.17953	-3.53988	-2.84784	-2.26461	-2.97169
Slc30a2	-0.0798018	2.35409	-0.018893	0.199158	-0.641712	1.54169	0.725347	0.657737	0.745664	-0.0185548	-0.713694	-0.709617	-0.756056	-0.551286	-0.499853	-0.769238	-0.482421	-0.717967	-0.520771	-0.553838	-0.751071
Ggt1	1.79966	2.35043	-0.273511	0.272567	-0.448175	0.612348	-0.0138768	0.0777791	-0.0241967	-0.450988	-0.548755	-0.440783	-0.379052	-0.194366	-0.0122824	-0.548968	-0.723464	-0.159067	-0.117596	-0.463479	-0.301692
Crisp4	1.25719	2.34548	0.918135	0.67588	2.18737	0.620275	0.010776	-0.00767448	-0.00719062	-1.3611	-1.87241	-1.2482	-1.16248	0.00171284	-0.0777881	-1.33701	-1.59079	-0.113289	-0.151875	-0.649605	-0.53492
Defb12	1.43171	2.34087	-0.309434	-0.0155729	-0.697238	-0.00859008	-0.00290865	0	0	-0.538284	-0.7875	-0.522137	-0.392857	-0.0267898	-0.0186697	-0.325833	-0.517443	-2.80552e-17	-0.0119304	-0.395686	-0.167444
Lrcol1	2.02072	2.34051	0.0738183	0.0405094	0.573984	0.137857	-0.00325254	-0.0055974	-0.00524046	-0.680498	-1.07972	-0.718899	-0.463701	-0.0399387	-0.000570782	-0.283469	-0.845483	-0.0166604	-0.0294723	-0.521666	-0.226661
Tcf7	0.0935209	2.3102	-0.379746	-0.277791	-0.11868	-0.217807	-0.204468	-0.166782	-0.156731	0.0893535	-0.220864	-0.27711	-0.306469	-0.0200147	0.100948	-0.267402	-0.185017	-0.0973587	-0.0212289	0.217941	-0.294227
C2cd4b	-0.1051	2.29082	-0.0626431	0.190995	0.792154	-0.153109	-0.093876	-0.0756427	-0.0709191	-0.287933	-0.363498	-0.438915	-0.398742	0.260218	0.0315721	-0.216597	-0.259093	-0.0898964	-0.10107	-0.299913	-0.160483
Hist2h2aa1	0.926604	2.21596	1.82158	1.43053	0.546756	0.763054	1.88202	1.46854	0.703933	-0.994175	-0.569133	-1.38926	-1.30492	-1.85373	-1.88502	-1.14358	-1.36166	-1.46979	-1.48498	-1.43257	-1.70759
Hist2h2aa2	0.95791	2.21076	1.88972	1.42065	0.513956	0.744828	1.88772	1.49182	0.724456	-1.0449	-0.557975	-1.42569	-1.29511	-1.88923	-1.90008	-1.13596	-1.37471	-1.45094	-1.46875	-1.52772	-1.69376
Lamtor4	1.26838	2.03532	0.0680639	0.683612	-0.291331	0.04031	1.29168	0.875193	0.0266459	0.179197	-1.2376	-0.981041	-0.756613	-1.33276	-1.20918	-0.405641	-0.654469	0.58506	-0.228576	-1.14099	-0.371141
Rnase13	1.26261	2.02839	-0.396948	-0.00796488	-0.395468	-0.00517121	0.0514072	0	0	-0.408423	-0.252307	-0.414157	-0.277882	-0.0177946	-0.0118985	-0.275463	-0.427548	6.95035e-17	-0.00697485	-0.321936	-0.117661
Wars	1.80968	2.00176	1.56595	0.760359	1.52286	1.63383	1.81841	1.82083	0.997732	-0.619612	-1.44889	-1.96727	-1.57496	-1.90028	-2.19676	-1.36507	-1.86636	-1.75564	-1.58974	-1.52282	-1.69841
Pebp1	1.14651	1.95126	1.22734	1.68597	1.26023	1.31336	1.41919	0.848962	-0.01558	-1.43136	-1.8697	-1.64676	-1.81026	-2.02558	-1.7292	-1.99273	-1.54228	-0.937787	-1.36723	-2.21601	-2.59107
Cd81	-0.538841	1.94481	-1.22144	-1.56863	-0.537615	0.156269	-0.714232	-0.389899	-0.121333	-1.15109	-0.87892	-2.40898	-1.94417	0.72176	0.877966	1.62217	0.644553	0.327074	1.20659	-0.103516	-0.35929
Folr1	1.45491	1.90233	0.38582	-0.112245	-4.24318e-05	0.634682	1.46994	1.53085	1.03315	-0.447274	-0.531063	-0.894354	-0.67037	-1.05724	-1.32706	-0.414648	-0.688193	-1.20262	-1.25023	-0.995898	-1.08544
Defb13	0.874209	1.88665	0.161962	-0.0113742	0.102605	0.0422354	0.522578	0.266952	-0.236685	-0.326634	-0.476668	-0.393071	-0.223076	-0.250964	-0.266413	-0.363272	-0.398876	-0.211087	-0.0931742	-0.389854	-0.260327
Sec11c	1.47786	1.83651	1.02067	0.332312	1.66364	1.15285	-0.207021	-0.0887863	0.124787	-0.896939	-1.1375	-1.39515	-1.34321	-1.00146	-0.342064	-0.160385	-0.493416	0.919066	1.29952	-0.987848	-0.272534
Eif1ax	0.205259	1.81517	1.18607	0.329144	0.223254	0.021996	0.617075	0.390042	0.423695	-0.664722	-0.199393	-0.281681	-0.0676248	-0.475092	-0.355663	-0.745596	-0.367643	-0.241641	-0.425465	-0.44142	-0.526019
Kcnh3	0.644056	1.78663	0.652809	-0.0615625	-0.0603708	0.0276113	-0.00303111	0	0	-0.316084	-0.364544	-0.300344	-0.295492	-0.0197633	-0.0187184	-0.39821	-0.385488	-0.00626472	-0.0179397	-0.20104	-0.138999
Tfap2b	0.10478	1.78328	1.55426	0.349833	0.701887	0.290826	0.700588	0.6521	-0.490598	-0.553562	-0.0417625	-0.140774	-0.467296	-0.641332	-0.658246	-0.597196	-0.931266	-0.564102	-0.562357	-0.703085	-0.632365
Pgf	0.318535	1.7541	0.301325	-0.368444	1.04902	-0.207483	-1.25541	-1.14518	-0.755748	-0.56946	0.321461	-0.279306	-0.509391	1.32397	1.6665	0.207255	-0.720729	-0.947223	-1.02323	-0.431594	-0.215089
Tm4sf4	-0.114357	1.74734	0.078455	0.203377	0.0189909	0.919592	0.00650523	0.197127	-0.0563838	-0.438784	-0.371517	-0.290176	-0.272284	-0.0850827	-0.0446189	-0.278591	-0.371222	-0.137877	-0.137116	-0.221975	-0.194946
Otof	-0.154993	1.7466	1.01608	0.213488	0.73547	0.137363	-0.00551152	0	0	-0.37253	-0.390655	-0.262843	-0.338154	-0.0248924	0.00814595	-0.467962	-0.451755	-0.0274982	-0.0393029	-0.197556	-0.175913
Mgst1	1.4244	1.71654	0.0422099	-0.793362	-0.559322	0.357619	0.441622	0.75922	-0.556558	-1.21989	0.759526	0.0418096	0.0194277	0.26402	-0.442092	-0.301391	-0.939941	-0.973252	-0.81063	-1.14367	-1.59865
Qsox2	1.03191	1.6917	0.774288	0.106296	1.38157	0.130585	-0.00226387	-0.0577776	-0.205497	-0.190582	-0.545651	-0.43165	-0.387575	0.0826757	-0.248317	-0.39596	-0.566733	0.00162175	0.477296	-0.321587	-0.226565
Hist1h4c	0.248708	1.65981	0.887223	1.35578	0.702117	0.504827	0.336515	0.209742	-0.243033	-0.628763	-0.29517	-0.815292	-0.845722	-0.372008	-0.466591	0.100135	-0.298625	0.0796339	0.0362264	-0.370555	-0.344256
Gm1673	0.153819	1.65502	1.07437	1.31362	0.165493	1.13918	1.48147	0.729451	0.396319	-0.95509	-0.0749923	-0.393766	-0.491435	-0.991089	-1.09035	-0.736899	-1.22454	-1.3206	-1.11864	-0.615807	-1.09804
Gjb3	0.134765	1.63058	-0.296003	-0.190272	0.494814	0.799755	-0.249237	-0.248002	-0.233553	-0.604467	0.602751	0.0777479	0.112666	-0.150447	0.298006	-0.421718	-0.499388	-0.303591	-0.216443	-0.367887	-0.325342
Btg3	1.11443	1.56822	0.707797	0.941824	0.0593403	0.603468	-1.02197	-1.10367	-0.409622	-0.396827	-1.23429	0.488855	0.190547	0.306549	0.225227	-1.21807	-0.902104	-1.36298	-1.56499	-0.269196	-1.25297
Trappc9	0.527653	1.56617	0.775443	0.209481	0.882734	0.450366	-0.00374286	0.180218	0.455885	-0.027692	-0.344691	-0.511262	-0.4662	-0.0497923	-0.10166	-0.239266	-0.347757	0.0374893	0.656618	-0.257529	-0.134561
Mid1ip1	0.638989	1.53273	1.38429	0.476023	0.804282	0.903115	0.873371	0.793319	0.56789	-1.38629	-0.302137	0.0254777	-0.443622	-0.741952	-0.110418	-1.17776	-1.65054	-1.36777	-1.13587	-0.718959	-1.38133
Rhbdl1	0.271207	1.50605	0.763378	0.286699	1.40829	0.122095	-0.219453	-0.201	-0.24663	-0.538044	-0.215198	-0.22945	-0.426988	-0.0828006	-0.24246	-0.438408	-0.431989	0.582787	0.98502	-0.430361	-0.364934
Itm2c	-0.0114407	1.48239	-1.46925	-0.305021	-0.363249	1.09947	0.971695	1.18546	0.4789	0.0699644	1.16108	-0.299338	-0.499253	-0.467195	-0.739605	0.311224	-0.594235	-2.0243	-1.33179	-0.858144	-0.467942
2310039H08Rik	1.02034	1.47167	1.0099	1.44429	0.811664	0.923965	1.43732	0.54345	0.23361	-0.263746	-0.839941	-1.00061	-0.892087	-1.00709	-1.00123	-0.720743	-0.816758	-0.342006	-0.416846	-0.900595	-1.01239
Hist1h1c	0.509232	1.45506	1.25986	0.890522	0.959261	0.394627	1.23539	0.709141	0.632597	-0.523868	-0.608902	-0.605223	-0.948117	-1.6643	-1.72356	-0.730903	-0.459464	-0.12044	-0.145244	-0.747105	-0.959409
Gpc4	1.00404	1.44003	-0.538016	-0.610171	-0.615188	-0.558895	-0.31612	-0.264433	0.0714209	0.558506	0.432538	-0.131525	-0.210665	-0.0160386	-0.294378	0.181355	-0.332155	0.0482268	0.685112	-0.600385	-0.448544
Gal3st4	0.0230618	1.40204	0.0620448	-0.016072	-0.0989594	-0.0185924	-0.0403772	-0.0331259	-0.031042	-0.189464	-0.099275	-0.13649	0.015531	-0.0386061	0.114123	-0.100575	-0.162541	-0.0290777	-0.0333573	-0.129386	0.136199
Arhgef40	1.01433	1.39219	0.265217	-0.149898	0.561152	-0.232428	-0.444597	-0.404921	-0.126031	-0.371982	-0.34584	-0.409217	-0.51016	-0.00155964	0.796677	0.073601	0.00637062	-0.112842	0.248054	-0.194563	-0.250549
Bex2	1.11126	1.38043	1.20834	0.779399	0.814023	0.0577816	0.0882176	0.227436	-0.0811577	0.687348	-0.552298	-0.597886	-0.577302	-0.185604	-0.111265	-0.785448	-0.790714	-0.315985	-0.324484	-0.42478	-0.455067
Chdh	0.422532	1.37599	0.710711	-0.0141984	0.489179	0.732026	0.351436	0.192256	-0.298895	0.520375	-0.371346	-0.197366	-0.28612	-0.330876	-0.246572	-0.587793	-0.639771	-0.388919	-0.382117	-0.45973	-0.350007
Zfand5	-0.296982	1.3669	-0.380755	-0.535214	-2.05034	-0.784878	-1.3997	-1.03738	-0.547047	-0.983957	0.243006	0.125586	-0.0702954	0.97053	0.788517	0.0207845	0.326579	-0.696585	0.394871	0.0822695	0.390853
Emx2	0.728163	1.36342	0.446344	0.11393	-0.0836184	0.221877	0.635079	0.942419	0.313458	-0.262643	-0.208598	-0.118486	-0.21733	-0.588578	-0.285595	-0.538414	-0.432231	-0.657593	-0.683938	-0.861064	-0.803492
Pepd	0.582122	1.3549	0.157726	0.336098	0.25386	0.250252	0.441668	1.05955	-0.0849094	0.131573	-0.179929	-0.548523	-0.472201	-0.522312	-0.561134	0.0170619	-0.240287	0.0985618	0.0689574	-0.709007	-0.0798416
Slc29a3	0.0486211	1.33161	0.433643	0.199628	0.58177	0.901941	0.138237	0.147503	-0.335895	-0.272338	-0.110285	-0.367807	-0.338946	-0.360769	-0.0624628	-0.292808	-0.365646	-0.214599	-0.151848	-0.276741	1.17033
Hist3h2a	1.08567	1.31684	1.07835	1.05694	0.610658	0.728246	0.711151	0.613254	-0.127059	-0.185119	-0.579764	-0.810148	-0.795093	-0.83445	-0.54955	-0.0793041	-0.56088	-0.462978	0.164462	-0.545263	-0.523214
Srd5a2	1.0036	1.31268	0.687603	-0.0955882	1.17278	0.339175	-0.340898	-0.284762	-0.267584	-1.00701	0.618815	0.336203	0.0755593	-0.316153	0.0711125	-0.222081	-1.09171	-0.26289	-0.328777	-0.675624	-0.479155
Scx	0.539894	1.30594	1.17698	0.0917106	0.701876	0.168162	-0.0674836	-0.0765306	-0.0717655	-0.231791	-0.332936	-0.0802179	-0.041943	-0.109632	-0.115892	-0.116662	-0.745082	-0.0811614	-0.0771909	-0.417198	-0.222977
Shisa2	0.442154	1.28317	0.192559	0.214755	0.503988	-0.056933	-0.0461301	-0.03423	-0.0320937	-0.268066	-0.212928	-0.251475	-0.128937	0.0722179	-0.0509667	0.0364009	-0.125231	-0.00430432	0.00495795	-0.202007	-0.151752
Mageh1	0.660443	1.26958	0.396694	-0.122937	0.651922	0.608439	0.0605967	0.109034	-0.262266	-0.0663542	-0.440231	-0.66776	-0.641192	0.143955	0.335754	0.566139	-0.045036	-0.0786009	0.150814	-0.124863	-0.760012
Nfe2l3	0.738056	1.25181	0.415686	-0.233458	0.0141873	0.667313	0.356614	0.271899	-0.181073	0.028378	-0.205	-0.370389	-0.281681	-0.198693	-0.209154	-0.341007	-0.346763	-0.167688	-0.202149	-0.165611	-0.149186
Pax2	0.16263	1.24294	1.07047	0.779546	0.704743	0.847068	1.10866	0.962228	-0.536346	0.247211	-0.244478	-0.398934	-0.511269	-0.874691	-0.939156	-0.656085	-0.928107	-0.917388	-0.747645	-0.751196	-0.799706
Pls3	0.209982	1.23933	0.830469	0.348513	0.642752	0.24004	0.269126	0.83837	-0.0621458	0.262477	0.426235	-0.486199	-0.100637	-0.708611	-0.639923	-0.448066	-0.409293	-0.245474	0.44598	-0.167605	-1.87402
Pofut2	0.393153	1.22264	0.32048	-0.313967	0.226604	-0.00363854	0.139243	0.0624267	-0.297963	-0.229199	-0.0697089	-0.569854	-0.290716	0.555836	0.317636	0.462605	0.167854	-0.0786807	-0.312928	-0.26842	-0.590052
Mfsd6l	0.040211	1.19766	0.82782	-0.00758464	0.318324	0.849385	0.0517326	0.227745	-0.0182339	-0.123184	-0.349662	-0.28521	-0.315446	-0.0920309	-0.150271	-0.373619	-0.336951	-0.169332	-0.172733	-0.216471	-0.184007
Prr5	1.18993	1.1929	0.0485087	0.263727	0.121643	0.0138801	-0.118514	-0.070057	0.394034	-0.345367	-0.396616	-0.305605	-0.394833	-0.073076	0.173754	0.495241	-0.158365	-0.100577	-0.155969	-0.28733	-0.0265375
Galnt7	0.283181	1.15535	0.67844	0.115213	0.749791	0.223582	0.0569754	0.150024	0.190401	-0.386326	-0.0552572	-0.295207	-0.283754	-0.33187	0.0210921	-0.240323	-0.332425	-0.258981	0.309777	-0.114777	0.949062
Pqlc2	0.731788	1.12389	0.377173	0.300754	0.61236	0.319576	0.0604067	0.235731	-0.112913	-0.120243	-0.378188	-0.293324	-0.257628	-0.0307329	-0.071321	-0.154289	-0.303186	-0.133616	0.00206251	-0.137133	-0.0794433
Rnf20	0.254109	1.12368	0.301206	0.0593078	0.225617	0.015679	-0.050193	0.187824	-0.410948	0.0688857	-0.158646	-0.443976	-0.366587	-0.167703	0.00295532	-0.0621724	0.107699	-0.0132592	0.156967	0.16756	0.0551889
Macrod1	0.518766	1.11563	0.251226	0.168489	0.104887	-0.183703	0.102381	-0.0765887	0.0228663	-0.291602	0.0370913	-0.207177	-0.247531	-0.202069	-0.207237	-0.0969561	-0.170895	0.647588	0.398796	-0.292496	-0.0536178
Hist1h3a	0.232243	1.11384	0.443447	0.457227	-0.091787	0.12363	-0.0113773	-0.052021	-0.0487866	-0.0387858	-0.0640439	-0.178469	-0.177891	-0.0181775	-0.0676695	-0.10418	-0.273933	-0.072202	-0.0767089	-0.0581802	-0.143031
Rasgrf1	0.687479	1.10936	0.189773	0.618839	0.629588	1.03329	0.0840157	-0.0550991	-0.0763639	-0.63448	-0.161094	-0.129634	-0.0851225	-0.115756	-0.116251	-0.451939	-0.541552	-0.217886	-0.22068	-0.257482	-0.226592
Cd320	0.435514	1.09959	0.58301	0.569012	1.07783	0.842059	0.0865067	0.0361953	0.331857	0.146795	0.032751	-0.32416	-0.36399	0.236231	-0.0742295	-0.0198573	-0.50423	-0.192652	-0.0144422	-0.345687	-0.467623
Ehd3	0.388833	1.09663	0.577629	-0.162407	0.249393	-0.145611	-0.0163929	-0.0521389	-0.0488837	-0.100102	-0.450815	-0.326871	-0.192341	-0.0225386	0.138319	-0.235573	-0.052425	-0.035163	0.0191621	0.145891	-0.16642
Wfdc11	0.526338	1.08694	0.888196	0.0481657	0.845252	0.746768	0.0267561	-0.010203	-0.00955598	-0.475799	-0.321256	-0.364877	-0.158969	-0.0376106	-0.0328805	-0.432974	-0.46801	-0.0683791	-0.0728244	-0.151905	-0.131063
Hist1h2ae	0.247511	1.08626	0.666791	0.501117	-0.270022	0.399252	-0.054512	-0.153883	-0.144535	-0.0531769	-0.420669	-0.158912	-0.151352	-0.169987	-0.177831	-0.0490016	-0.324178	-0.173343	-0.202927	0.138388	0.0740213
Creb3	0.706884	1.08185	0.487059	0.0911917	0.731085	0.460945	0.71443	0.884936	0.335667	-0.147989	0.366373	-0.279662	-0.224499	-0.49496	-0.579647	0.0239557	-0.554198	-0.736427	-0.419454	-0.291555	-0.880345
Plekhg5	0.152208	1.05698	0.260789	0.109313	0.30373	0.559817	-0.0437924	-0.041761	-0.167149	-0.238888	-0.224684	-0.196041	-0.136303	-0.119694	-0.157405	-0.273902	-0.11077	-0.00768619	0.191231	0.128829	-0.000683334
Gspt2	0.709649	1.05189	0.352827	0.112594	0.0121386	0.200582	-0.140361	-0.0650113	-0.151556	-0.157959	-0.422044	-0.331035	-0.201593	-0.0523364	0.0746117	-0.184491	0.0952082	-0.0235197	-0.00868523	-0.279448	-0.237989
Padi2	1.04043	1.04921	0.00980174	-0.0806839	0.0525347	-0.0392965	0.738048	0.809218	0.313421	-0.230475	0.0278568	-0.388194	-0.308494	-0.462917	-0.485097	-0.266764	-0.325929	-0.378445	-0.292523	-0.20409	-0.182159
Trpm3	0.714764	1.04599	0.810337	0.0100303	0.721881	0.295435	-0.048165	-0.0370523	-0.0347297	-0.120515	-0.387485	-0.326148	-0.284757	-0.000696187	0.0472248	-0.139258	-0.269058	-0.0588065	-0.0658616	-0.196293	-0.169873
E430018J23Rik	0.0613064	1.03908	0.498078	0.0159243	0.264106	0.14209	-0.053292	-0.113716	-0.106711	-0.0874034	-0.126438	-0.141752	-0.150008	-0.0172449	-0.0584033	-0.159566	-0.0617463	-0.0227283	0.234303	-0.139074	-0.152171
Cd3eap	0.658007	1.02232	0.139944	0.432776	0.545349	0.445956	0.107673	0.176675	0.447567	-0.122276	-0.208561	-0.184592	-0.28218	0.217649	-0.210345	-0.231893	-0.239694	-0.30431	-0.154346	-0.0147293	-0.681305
Timm10b	0.929013	0.999285	0.923783	0.74057	0.727586	0.491068	0.76395	0.479786	0.352685	0.207439	-0.364889	-0.805295	-0.713554	-0.75141	-0.717306	-0.340208	-0.531938	0.512812	-0.0928049	-0.407338	0.0369919
Hist1h2be	0.122569	0.998189	0.481416	0.631916	-0.312247	0.141226	0.160991	-0.0870413	-0.169912	-0.222281	-0.309945	-0.226964	-0.195674	-0.0838916	-0.115302	0.00795197	-0.138437	-0.125657	0.17754	-0.148768	0.0278817
B4galt4	0.968127	0.9971	0.45459	0.153306	0.852702	0.387494	0.704186	0.576236	0.161396	-0.245615	-0.357895	-0.468144	-0.392437	-0.384875	-0.478015	-0.148797	-0.383159	-0.449439	-0.421789	0.155353	-0.269636
Tctn1	0.370967	0.976103	0.260723	-0.125949	0.233845	0.291303	0.0314321	0.00577896	-0.150585	-0.0510871	-0.17124	-0.216928	-0.23525	0.259374	0.146871	0.168769	-0.173261	-0.0433954	-0.078656	-0.143819	-0.183575
Tmem107	0.258156	0.975081	0.916713	0.417392	0.139588	0.50579	0.494589	0.244143	0.235256	-0.377251	0.248681	-0.422701	-0.300577	-0.256375	-0.0759196	0.199088	-0.226817	-0.2319	-0.623526	-0.364183	-0.455072
1810022K09Rik	0.728737	0.971925	0.730332	0.322509	-0.0622439	0.131665	0.531898	0.411942	-0.0145571	-0.222863	-0.277604	-0.10415	-0.155521	-0.136163	-0.773643	-0.180685	-0.414103	-0.0139147	-0.191501	-0.477656	-0.28128
Dysf	0.407343	0.945968	0.178017	-0.097853	0.294998	-0.0717375	-0.239904	-0.227962	0.323064	-0.233906	-0.254936	-0.347301	-0.107856	-0.260427	-0.239773	-0.281784	-0.185994	0.51553	0.858374	0.753798	-0.246253
Esrp2	0.698154	0.93795	0.768358	0.181254	0.649597	0.373454	0.404858	0.51771	-0.120752	-0.0479493	-0.0327402	-0.192719	-0.242307	-0.387938	-0.384297	-0.316792	-0.42412	-0.328624	-0.29335	-0.394911	-0.260334
Leprel4	0.170296	0.927603	0.200826	0.00361332	0.489144	0.257224	-0.176646	0.0760706	0.132511	-0.229074	0.0446283	-0.416024	-0.435027	0.315201	0.37692	0.54669	0.171034	-0.143946	0.127522	-0.406558	-0.463318
2210016F16Rik	0.442354	0.925944	0.912436	0.6854	0.872823	0.485186	0.414362	0.803702	0.136662	-0.247604	-0.138965	-0.417814	-0.499862	-0.218603	-0.297904	-0.1346	-0.239673	-0.307832	-0.0369398	-0.588935	-0.477123
Agtrap	0.668908	0.924354	-0.222755	0.0376008	-0.175402	0.578071	0.603937	0.197	0.0375052	0.549053	-0.266328	-0.446517	-0.549983	-0.501893	-0.45126	-0.225643	-0.242834	-0.323875	-0.199458	0.0861317	-0.225413
Hist1h2ac	0.2803	0.922141	0.455997	0.655311	0.546947	0.323725	-0.165637	0.617575	-0.439149	-0.0573511	-0.275927	-0.0342844	-0.0546155	-0.377773	-0.408684	-0.241763	-0.299326	-0.3754	-0.42351	0.14077	-0.146067
Unc5b	-0.519241	0.916474	-0.35792	-0.150466	-0.356717	0.35406	-0.640712	-0.627361	-0.68158	-0.41318	0.639712	0.166322	-0.25375	-0.373326	0.473785	0.234295	0.0505297	0.111182	0.803616	-0.0201393	-0.550461
Rbm15b	0.47239	0.900962	0.217506	0.372925	0.575534	0.608883	-0.0897026	-0.054253	0.00755502	-0.175595	0.341963	-0.120968	0.177481	0.0968761	0.0266308	-0.602902	-0.368863	-0.21153	0.215954	-0.203728	-0.487872
Spty2d1	0.518563	0.900611	0.517087	0.244866	0.469644	0.166773	0.197955	0.346038	-0.170495	-0.284618	-0.304	-0.435722	-0.459974	0.659052	-0.0245705	0.49744	0.0441877	-0.984745	-0.528314	-0.411028	-0.241379
Galk1	0.114467	0.895886	0.225652	0.228869	-0.378307	0.325377	-0.137386	0.302406	0.274729	-0.00808955	0.000588251	-0.332002	-0.126677	-0.280671	-0.348151	0.0130335	0.026774	0.437555	0.392751	0.120944	-0.554014
Mef2a	-0.76214	0.892235	-0.0505551	-0.5005	-0.143999	-0.515779	-0.701601	-0.395077	-0.284741	-0.144147	0.505078	-0.481205	-0.270193	-0.21593	0.849682	0.523025	0.439267	-0.017821	0.863022	0.328748	-0.168143
Mboat1	0.250536	0.867549	0.256466	0.078104	0.70828	0.815156	0.642825	0.618501	0.0537057	0.378867	0.585882	0.0906181	0.19945	-0.703337	-0.554635	-0.944866	-0.940309	-0.81019	-0.7605	-0.741853	-0.787463
Galnt14	-0.169295	0.866176	0.0937011	-0.0609048	-0.0511371	-0.0706046	-0.109221	-0.0505349	-0.106435	-0.188672	0.650274	0.193907	0.105565	-0.113746	-0.119743	-0.0152372	-0.22448	-0.0151696	0.0473301	-0.138504	-0.128804
Serp1	0.665986	0.856181	0.350363	0.43038	-0.59168	-0.176861	0.372218	-0.0389419	-0.164708	-0.916975	-0.56327	0.218877	0.121823	-0.297891	0.0208647	-0.291972	-0.289975	-0.39056	-0.663723	-0.795193	0.810172
Cdk7	0.392775	0.852547	0.424366	0.26994	0.541229	0.00311354	0.113316	0.273013	-0.477017	-0.152085	-0.323484	-0.219055	-0.0614006	0.195352	-0.113342	-0.101863	-0.08752	0.0442861	0.167708	-0.432406	-0.337638
Rab6b	-0.0547293	0.837377	0.511008	0.472423	0.553154	0.568672	-0.101845	-0.0803438	-0.0754117	-0.335915	-0.0524161	-0.223036	-0.262591	0.0137195	-0.101528	-0.339757	-0.0843174	-0.0130609	0.0742812	-0.107279	-0.197462
Tmem248	0.670632	0.817042	0.497945	0.0794505	0.725076	0.493139	0.251822	0.16608	-0.0381198	-0.0266302	-0.131972	-0.482556	-0.36275	0.216948	-0.0838732	0.0415404	0.00716505	-0.622726	-0.230879	-0.0637319	-0.242053
Rab11fip2	0.0358323	0.813991	0.615521	0.0494043	0.537925	0.0255008	-0.240564	-0.347913	0.0921019	-0.0717943	0.346558	-0.110366	-0.408737	0.115187	0.318179	0.0436275	-0.0798966	-0.0291675	0.59775	-0.28682	-0.589426
Sardh	0.337956	0.811454	-0.149399	-0.0594663	-0.187637	-0.0866318	0.219314	-0.00345018	-0.192706	-0.10989	-0.209856	-0.187857	-0.106549	-0.199524	-0.103502	-0.0592184	0.0369399	0.0539804	0.102776	0.0509001	-0.170669
Fam71a	-0.184569	0.811451	-0.0126344	0.00334884	-0.220495	0.192599	-0.364147	-0.318875	-0.300307	0.0676622	0.0146956	0.0226634	0.243684	-0.208647	0.43268	0.00237619	0.0150446	-0.335315	-0.335365	-0.171699	-0.0681161
Tchh	0.503375	0.797653	-0.201161	-0.228168	-0.574361	-0.259633	-0.0908021	-0.0115814	-0.369454	-0.336627	-0.0877644	-0.176613	-0.197528	-0.0136452	0.221637	0.110814	0.34561	-0.166068	0.100075	-0.485222	-0.418462
Tmem39a	0.747173	0.797623	0.579988	0.0541807	0.756667	0.459421	0.211768	0.116533	0.130213	-0.412276	0.135309	-0.256392	-0.36071	0.230359	0.0358851	0.366316	-0.205872	-0.545752	-0.206751	-0.341211	-0.118288
Hsf2bp	-0.385422	0.780793	-0.45545	-0.168553	-0.668119	-0.212367	-0.202133	-0.184599	0.381257	-0.473755	0.780405	0.65622	0.676092	-0.174808	-0.174682	-0.333486	-0.416023	-0.234546	-0.135104	-0.24961	-0.31579
Bsdc1	0.595101	0.775025	0.281919	0.0829356	0.347718	0.147	0.337614	0.487998	-0.0103448	0.126337	-0.16665	-0.143779	-0.253861	-0.383351	-0.335332	-0.403423	-0.250087	-0.238015	-0.340852	0.00295647	-0.455491
Izumo4	0.225239	0.770261	0.466281	0.199875	0.442359	0.393931	-0.0379969	0.0314653	-0.369142	-0.104158	-0.0427677	-0.308426	-0.405589	-0.0535701	0.679623	0.482398	-0.120464	-0.31357	-0.395244	-0.24436	-0.317447
Chac1	0.386248	0.76041	-0.460967	0.203876	-0.0990998	0.314129	0.249762	0.330882	-0.271795	-0.372601	-0.379874	0.184929	0.465328	-0.29868	-0.315647	-0.360237	-0.473181	-0.279127	-0.0979292	0.240586	-0.266426
Zfp13	0.527271	0.758156	-0.101488	0.120452	0.0258242	-0.11108	0.00853886	0.118407	0.222022	0.210928	-0.261876	-0.187513	-0.0863634	-0.0154407	-0.0745875	-0.127255	-0.108153	-0.0397211	0.249034	-0.111584	-0.12314
Stxbp6	0.412894	0.754743	0.214242	0.38154	0.160427	0.333842	0.646052	0.524483	0.359757	0.287522	-0.220144	-0.421562	-0.401072	-0.535502	-0.621574	-0.288927	-0.301819	-0.400228	-0.327745	0.411112	-0.309548
Aup1	0.40924	0.751042	0.538368	0.249349	0.573092	0.358757	0.626716	0.30113	-0.325224	0.0978999	0.158404	-0.368021	-0.0613114	-0.404631	-0.0851718	-0.141319	-0.435729	-0.539159	-0.131968	-0.229068	0.319221
Dctpp1	0.667121	0.746975	0.56631	0.530905	0.450503	0.406098	0.638893	0.354978	0.0129696	0.0123922	-0.427441	-0.309789	-0.381103	-0.690668	-0.504274	-0.373993	-0.460874	0.00589502	0.114724	-0.140087	-0.109217
Supt4a	0.0796501	0.74275	0.578355	-0.0905308	0.577862	0.202802	0.45489	0.543999	-0.385173	0.00325686	-0.150509	-0.292727	-0.36739	-0.475079	-0.41732	-0.26182	0.0422053	-0.419355	-0.592575	-0.0724172	0.16721
Pabpn1	0.473873	0.74164	0.175536	0.0216479	0.159738	-0.595512	0.0474688	-0.189673	0.160958	0.421217	-0.805362	0.139574	0.114882	-0.139066	0.19986	-0.844068	-0.262159	-0.223471	-0.626822	-0.196872	-0.561585
Hoxd3	0.385365	0.73215	0.486823	0.137947	-0.154047	0.386367	0.671273	0.556625	-0.0628655	0.481343	-0.267873	-0.270289	-0.343719	-0.528421	-0.439853	-0.383463	-0.353551	-0.352192	-0.323081	-0.402162	-0.515596
Tbx2	0.722246	0.730296	-0.487269	-0.0590137	-0.361818	0.156486	0.506248	0.106936	0.206607	0.57699	-0.142019	-0.107877	-0.156886	-0.342401	-0.134604	-0.568967	-0.413317	-0.202912	0.0633739	-0.496654	-0.719216
Mlxipl	0.665573	0.722551	0.344063	0.265393	0.381864	0.4071	0.0296936	-0.0388665	-0.0364442	-0.0550694	-0.225939	-0.230246	-0.215764	-0.0526533	-0.0526362	-0.0519069	-0.283317	-0.0724922	-0.0733206	-0.166418	-0.13182
H1fx	0.330896	0.719966	0.0861219	0.264972	-0.0758212	0.0100803	0.199647	0.248597	0.530802	-0.240716	-0.179915	-0.383512	-0.135671	-0.128552	-0.230951	0.108352	0.175186	-0.0270183	0.184285	-0.227908	-0.364225
Cant1	0.188246	0.719815	0.108458	-0.193804	0.633275	0.147995	0.133086	0.0524095	-0.309791	0.36926	-0.273966	-0.270652	-0.129057	-0.104897	0.106761	0.0234118	-0.138331	-0.0678065	-0.0342046	-0.152916	0.300701
Mthfr	0.298495	0.697487	0.0326446	0.0342758	0.171862	0.306433	0.025322	-0.0344229	-0.188454	-0.0224553	-0.163321	-0.239399	-0.189063	-0.0859011	0.0928945	-0.0760144	0.0285942	-0.0467609	-0.0863282	0.0425636	-0.0956732
Sfxn1	0.203033	0.694679	0.00218476	0.62816	0.360372	0.143674	0.0923927	0.0539754	-0.401475	-0.159288	-0.430089	-0.186954	-0.259812	0.395405	0.0358572	0.0150302	0.0557601	-0.419744	-0.250527	-0.065787	-0.558092
Nme6	0.122709	0.689963	0.0460701	0.221458	0.404774	0.155549	0.207085	0.407053	-0.25958	-0.0490276	-0.213703	-0.116846	-0.130948	-0.269725	-0.205085	-0.12463	-0.12205	0.0410013	-0.134112	-0.0101429	-0.239127
Pigp	0.453197	0.687951	0.611492	0.507008	0.397599	0.378559	0.480651	0.223702	0.173735	0.416464	-0.213008	-0.385585	-0.616389	-0.371678	-0.0819885	-0.300854	-0.466804	0.434277	0.333897	-0.665709	-0.858502
Sh3bp2	0.135825	0.685372	0.0594243	-0.190824	-0.0433313	0.192976	-0.152932	-0.177923	-0.167102	0.0911322	0.194935	-0.0847086	-0.166007	0.202226	0.251571	0.0625863	-0.118897	-0.174506	-0.214146	-0.20214	0.619417
Hoxb5	0.254462	0.682829	0.159293	0.661595	0.163927	0.191099	0.595328	0.490816	0.0159834	0.10881	-0.274511	-0.16569	-0.167547	-0.439517	-0.349061	-0.0638374	-0.330633	-0.415882	-0.412592	-0.158644	-0.296049
Klhdc3	0.593603	0.675143	0.530255	-0.046731	0.6559	0.15291	0.217172	0.0304031	-0.202115	0.547021	0.11494	-0.256265	-0.221767	-0.108118	-0.0804174	-0.201616	-0.391911	-0.126462	-0.15845	-0.267332	-0.182531
C77370	0.374415	0.671435	-0.177713	0.075319	-0.00829682	0.216068	0.00822006	-0.0403281	-0.0754732	-0.00637095	0.242016	0.0283003	-0.0344174	-0.0888548	-0.0926214	-0.224904	-0.238955	-0.0155387	-0.0185409	-0.0824116	-0.140199
Pbx2	-0.0287907	0.670845	0.283507	0.114296	0.391556	0.101255	0.116037	-0.029584	-0.292332	0.122899	-0.150545	-0.209021	-0.235674	-0.187559	-0.11093	-0.0267823	-0.0230687	0.0989617	0.0831657	0.154097	-0.295444
Ccdc167	0.657834	0.66603	-0.136015	0.372168	-0.17845	0.1023	0.0290219	0.228765	-0.140014	0.286383	-0.120811	-0.233283	-0.138845	-0.101594	-0.12596	-0.23974	-0.198973	0.182593	-0.0470343	-0.0982094	-0.0713184
E4f1	0.201113	0.663323	0.272017	0.284192	0.359527	0.417725	0.198776	0.184603	0.299492	0.136938	-0.136187	-0.211972	-0.146653	-0.155834	-0.254072	-0.0641502	-0.234883	-0.085257	0.327616	-0.0588559	-0.360431
Mycbpap	0.386913	0.660214	-0.0355089	0.0435152	0.301386	0.164108	0.0721792	-0.00451794	-0.0904844	0.043785	0.0934048	-0.124721	-0.0929975	0.0878434	-0.0613786	-0.149762	-0.178444	-0.0972921	-0.00442011	0.0663053	-0.113904
Gramd3	0.225628	0.658427	0.216554	-0.119429	-0.259429	0.24187	0.535697	0.113629	-0.0481577	0.259021	0.329907	-0.120386	-0.189585	-0.288422	-0.248124	-0.260535	-0.314967	-0.537953	-0.322688	0.102016	-0.128994
1110004E09Rik	0.156306	0.656854	0.650851	0.465294	0.623116	0.164226	0.425651	0.350712	0.419264	0.109155	-0.564368	-0.275341	-0.346758	-0.255981	-0.0920281	0.0385877	-0.182397	-0.319937	-0.24033	-0.129496	-0.649262
Nsf	0.0995772	0.655118	-0.0411294	-0.107525	0.41432	-0.113432	0.103026	0.23467	0.496725	0.587338	-0.30599	-0.355678	-0.144255	-0.176409	-0.23751	0.137015	-0.125397	-0.0812956	0.0774557	0.195537	0.30195
Vps45	0.306098	0.637889	0.289583	0.167666	-0.090215	-0.0566486	0.25011	0.389115	-0.218396	-0.105592	-0.156369	-0.261319	-0.17712	-0.197905	-0.276016	0.00253908	-0.0503223	0.0968332	0.264034	-0.0601683	-0.19298
Dnajc11	0.200345	0.62243	0.409555	0.127185	0.467026	-0.120969	0.172265	0.18679	-0.142797	0.111135	-0.159121	-0.176535	-0.166705	-0.366244	-0.209328	0.018288	-0.126322	0.139487	0.186876	-0.060061	-0.222909
Hist1h2ao	0.274256	0.612194	0.509243	-0.0450674	0.00062849	-0.0787252	-0.202153	-0.105028	0.163609	0.0678561	-0.267661	0.139916	0.145361	-0.220952	-0.245691	-0.233453	-0.212985	-0.351053	-0.347939	0.402392	0.316349
Rfk	0.404244	0.61127	-0.0272866	-0.0101208	-0.846837	-0.287747	-0.0315149	0.121265	-0.786017	0.142308	-0.510133	-0.212477	-0.331957	-0.106275	0.181669	-0.469458	0.171747	-0.236544	-0.364179	0.530921	-0.16062
Cables2	0.261893	0.609584	-0.264682	-0.137273	0.0352418	-0.219755	-0.153282	-0.0997929	-0.221553	0.096183	0.170266	-0.0617964	-0.00572118	-0.171232	0.018557	0.0877595	-0.0782621	0.0223481	0.340119	0.158433	0.16364
Vwa2	-0.020606	0.607637	0.122078	-0.0930023	-0.245362	0.212926	-0.0016812	-0.0268285	0.246326	0.451584	0.437271	0.0327337	-0.110287	-0.0730855	-0.0797162	-0.238364	-0.312751	-0.0764099	-0.0803949	-0.13443	-0.138632
N4bp2	0.427004	0.606834	0.470493	-0.0685464	0.481928	-0.0987231	-0.128589	0.100833	-0.0881242	0.204102	-0.225529	-0.207382	0.0237417	-0.11818	0.144259	-0.0196116	-0.0654672	-0.287994	-0.032746	0.0717884	-0.236488
Hist1h2bg	-0.0895245	0.606582	0.595852	0.162788	-0.0357146	0.111005	0.043262	-0.00157056	-0.0695867	-0.0198937	-0.10613	-0.06277	-0.168503	-0.0822817	-0.0873594	-0.221172	-0.119	-0.0956284	0.021893	-0.0733032	0.0224308
Kdm2a	0.147577	0.602384	0.410455	0.310548	0.394878	0.456986	-0.0630423	-0.127053	-0.69251	0.161815	0.0835477	-0.184326	-0.125089	-0.284344	-0.0593089	-0.0198037	-0.214349	0.2159	0.289756	0.123517	-0.669085
Hist1h4a	-0.000866495	0.596172	0.373257	0.297184	-0.0785938	0.425537	-0.0133438	0.0404813	-0.0426568	-0.0937596	-0.0998108	-0.154203	-0.162307	-0.0571164	-0.0180175	-0.223431	-0.0745422	0.0932756	-0.0929789	-0.0304179	-0.133764
Tsr1	0.585294	0.595803	0.335483	0.226355	0.407039	0.337607	-0.00447141	0.0517068	-0.0698054	-0.409772	0.363838	-0.00144728	0.0140242	0.0365851	0.0620245	-0.0737709	-0.177468	-0.0924775	-0.225808	-0.40344	-0.833624
Elane	0.318398	0.586232	-0.138814	0.222059	-0.719703	0.0608591	0.180496	-0.157033	0.0163426	-0.312739	-0.145892	-0.0854171	0.123875	-0.255856	-0.0289239	-0.16303	0.0311178	-0.04548	-0.226669	0.0939089	0.125929
Crtc2	0.170954	0.581928	-0.126643	0.0299133	0.0250605	-0.0387338	-0.163974	-0.108843	0.152791	-0.0805083	-0.154348	-0.208009	-0.0188157	0.171006	-0.0214851	-0.049689	0.0737541	-0.208598	0.0309484	0.580774	0.280798
Safb	0.219479	0.579777	0.456827	0.186437	0.505532	-0.168964	-0.128892	-0.0129385	-0.0272634	0.0883871	0.0914938	-0.0774632	-0.302154	0.0485704	0.0216304	-0.505328	-0.0425678	-0.0145402	0.00734313	0.0626111	-0.158543
Gins2	0.108451	0.56328	0.230941	0.110495	-0.104705	0.0477234	0.43906	0.464036	0.440471	-0.109345	0.133002	-0.0393105	-0.0108577	-0.361367	-0.300179	-0.147008	-0.199012	-0.311214	-0.286259	-0.224423	-0.108427
Lmnb2	0.0848419	0.555982	-0.0290812	-0.0132313	0.485337	-0.0476055	0.0850419	0.149173	0.191195	0.112719	-0.171154	-0.164813	-0.232583	0.0709331	0.07876	0.0921522	-0.00141839	-0.236473	-0.0562604	0.021142	-0.25268
Mad2l1bp	0.122692	0.544128	0.167313	0.213135	0.494182	0.223904	0.344304	0.503429	0.219045	-0.125156	-0.197181	-0.270648	-0.159567	-0.34172	-0.125825	0.0520652	-0.0491782	-0.431745	-0.294694	0.109242	0.0646804
Ttc23	-0.157894	0.537554	-0.0400508	-0.0789858	0.167596	-0.0794635	0.0252901	-0.0300323	-0.148297	0.019397	-0.221819	-0.0491945	-0.119626	-0.160191	0.03551	0.311395	0.0636732	-0.00247727	0.0171685	-0.0271613	-0.19345
Rab40c	0.432134	0.534945	0.384781	0.161301	0.0881863	0.241767	0.131935	0.445911	-0.0954957	-0.0810804	-0.228022	-0.137952	-0.128707	-0.217878	0.126135	-0.262996	-0.135357	-0.233465	-0.0784917	-0.201127	-0.328136
Zbed5	0.489496	0.53201	0.242667	0.2654	0.204591	0.0573602	0.371873	0.26188	-0.165506	-0.0648382	-0.264926	-0.27172	-0.159091	-0.257256	-0.0984254	-0.2453	0.000545986	-0.176778	-0.129114	-0.131738	-0.357141
Hemk1	-0.0395948	0.531581	0.516743	0.148578	0.169433	0.33625	0.375161	0.277321	0.0127264	0.0436079	0.0950649	-0.214757	-0.117112	-0.238641	-0.204702	0.0108496	-0.178383	-0.0189865	-0.155399	-0.248888	-0.156049
Dhdds	0.460501	0.529176	0.331376	0.362783	0.255444	0.214771	0.195109	0.168161	0.15275	0.165794	-0.418639	-0.248324	-0.183792	-0.102481	-0.0873311	-0.0874741	-0.162064	-0.00760635	0.0552181	-0.246034	-0.152177
Hist1h2ap	0.282594	0.52297	0.326002	-0.0127703	0.0438441	-0.0833612	-0.202549	-0.106814	0.158263	0.0111269	-0.224004	0.156513	0.167373	-0.219509	-0.244772	-0.199982	-0.174978	-0.348549	-0.344612	0.422189	0.332345
Leprel1	-0.251406	0.521448	-0.0251638	-0.193222	-0.421381	-0.190601	-0.16067	-0.160858	-0.150985	-0.269591	-0.106843	-0.264087	-0.212944	-0.164343	-0.175274	0.45156	0.367787	0.210723	0.171668	0.313637	0.478165
Tfb2m	0.393293	0.521006	0.355616	0.0843109	-0.143167	0.0111273	-0.032864	0.0236677	-0.0301252	-0.249433	0.00837639	-0.119031	-0.153278	0.123939	0.137996	0.0735147	-0.0996265	0.362766	0.38124	-0.296998	-0.50736
Gm3258	0.205968	0.520883	-0.196555	0.0903877	0.0477986	0.150884	0.0903234	0.318652	-0.0438449	0.0184369	-0.291683	-0.139115	-0.180439	0.0271055	0.0619849	0.00293149	0.082985	-0.266934	-0.266621	-0.280312	0.10656
Gmps	0.162399	0.520651	0.300436	-0.156593	0.357891	0.216941	-0.176054	0.132289	-0.0402771	-0.244007	0.222492	-0.123236	-0.192083	0.187433	0.0921796	-0.148847	0.087966	-0.242769	0.368989	-0.0819257	-0.312032
Slc25a32	0.337541	0.519677	0.155275	0.0742107	0.416681	-0.0140058	-0.164676	-0.0673867	-0.403247	-0.0887801	0.0402767	-0.250168	-0.240436	0.295221	0.192474	0.112777	0.116762	-0.122262	-0.190042	0.0939574	-0.00957632
Zbtb48	0.110426	0.514047	0.090365	0.0358254	0.264542	0.109783	0.0338716	0.0336743	-0.169231	-0.150967	0.23037	-0.0389385	-0.0114045	0.237345	-0.0139543	-0.119724	-0.0912687	-0.11316	-0.0572183	0.029058	-0.0923273
Ruvbl2	-0.226618	0.510496	0.095465	0.263669	-0.197226	-0.029786	-0.184866	-0.207229	-0.283466	-0.124145	0.166194	0.364241	0.19073	-0.151682	0.0959045	-0.309669	-0.226122	-0.116861	-0.142151	-0.11175	-0.262644
Yy1	0.0595466	0.508477	0.473008	-0.099441	0.281258	0.174059	0.25588	0.225585	0.120822	-0.292774	-0.0404113	-0.0331715	-0.176662	-0.281279	-0.120126	0.0113337	-0.0930239	-0.566978	0.144278	0.208868	-0.624061
Gpalpp1	-0.0791756	0.506839	-0.064056	0.0925917	-0.0394495	-0.0587471	0.134814	0.265929	-0.45764	0.36312	0.12647	-0.0749026	-0.228732	-0.0662835	-0.117262	-0.143958	-0.108306	-0.235018	-0.487122	0.0536511	0.253569
Zfp40	0.372438	0.504762	0.195834	-0.0262494	-0.0149293	-0.118473	-0.00996985	0.0546172	0.217753	0.279519	0.173047	-0.141941	-0.185491	-0.146997	0.0127203	-0.0973418	-0.128802	-0.00526105	0.0682803	-0.0344151	-0.00971135
C330018D20Rik	-0.0679577	0.504672	0.136913	0.0574946	0.164063	-0.0583886	0.246254	0.171743	-0.278562	0.198669	-0.116479	-0.0768364	-0.134356	-0.182248	-0.147755	-0.127586	-0.118236	0.164069	0.0635193	-0.207349	-0.239806
Ddx55	0.254677	0.503397	0.322676	0.0373037	0.208799	0.305103	0.263366	0.0669041	-0.351388	0.0637001	-0.176332	-0.263425	-0.199431	-0.0561487	0.0744173	-0.293867	-0.063401	0.033607	-0.111122	-0.160391	-0.173313
AI661453	-0.0343661	0.497957	0.337795	0.0281442	0.0540647	0.200401	0.193234	0.32384	0.0866615	-0.0711623	0.0879017	0.0332613	0.0794181	-0.199231	-0.273092	-0.00640419	-0.152658	-0.270748	-0.261732	-0.162488	-0.229305
Zfp740	0.257244	0.497596	0.364089	0.242189	0.220045	0.249363	0.00343264	0.126071	-0.157468	0.137667	0.060781	-0.198977	-0.352064	-0.140964	-0.127196	-0.210981	-0.104445	0.177259	0.340732	-0.0267928	-0.295824
Ccar2	0.229654	0.496965	0.161644	0.192912	0.0337072	0.042198	0.081631	0.179282	-0.240939	0.0686196	0.0748906	-0.0864966	-0.00869683	-0.194851	-0.155955	-0.0500425	-0.123965	-0.0503627	-0.0682643	-0.000807994	-0.0411731
Heyl	-0.102275	0.495336	-0.141687	-0.105522	-0.199055	0.424628	0.40957	0.473183	-0.33322	-0.164233	-0.193057	-0.249976	-0.231948	-0.199227	0.0131222	0.178906	0.124106	-0.415533	-0.383015	-0.166536	-0.368945
Pcgf2	0.111469	0.491431	-0.118557	-0.254704	-0.14777	-0.2201	-0.0316915	-0.0425089	-0.285066	0.130969	0.0776861	-0.0175824	-0.0194523	0.110695	-0.00991601	0.272521	-0.0309637	-0.219504	0.0107934	0.0993181	-0.192299
Tead2	0.190148	0.48954	-0.00552157	-0.0450149	0.056851	-0.128144	0.345205	0.0778573	0.245264	0.295934	-0.238225	-0.321336	-0.235583	-0.0478512	-0.110274	-0.129808	0.0973724	-0.240983	-0.0963481	-0.00398568	-0.29465
Shroom1	0.0482648	0.488136	0.342379	0.262572	0.346578	0.15153	0.101136	0.210636	-0.180296	0.00964704	-0.0284324	-0.0418537	0.0606255	-0.192733	-0.0721773	-0.181388	-0.178	-0.164546	-0.101757	-0.126499	-0.21057
Rars2	0.279212	0.483999	0.193869	-0.183627	0.249205	0.036913	0.10736	0.331107	0.479695	0.0569528	0.119664	-0.0964878	-0.0435215	-0.0455953	-0.302228	0.103481	-0.146235	-0.0568791	0.145856	-0.2219	-0.113713
Ofd1	-0.0333164	0.472473	0.207917	-0.00767423	0.21758	0.0285186	0.168234	0.148728	0.0830033	-0.0601273	-0.291485	-0.0378639	0.140419	-0.173949	-0.00678402	0.0476216	-0.0511249	-0.274635	-0.0543376	-0.17783	-0.190821
Dusp23	0.273864	0.471315	0.205772	0.0480763	0.267687	0.00711197	0.030154	-0.0217557	-0.099513	-0.127421	0.00653338	-0.118086	-0.000798859	0.0164088	-0.0329979	-0.0761852	-0.103704	0.0813778	0.0103756	0.0441461	-0.117372
Mks1	0.221211	0.468235	0.0752321	0.164276	-0.148827	-0.0215473	0.0629336	0.217435	-0.0996969	0.0537287	-0.06384	-0.0329598	-0.0449861	-0.0482536	0.0387904	-0.0396883	-0.145732	-0.108395	-0.106372	-0.0430364	-0.115069
Klhdc10	0.347614	0.463899	0.133402	-0.0435239	0.0397241	-0.0565174	0.0666649	0.0193941	-0.0912117	0.310321	-0.155369	-0.184629	-0.11093	-0.129065	-0.0313614	-0.0352892	-0.0721064	0.0557074	0.0717447	-0.072345	-0.143628
Hsdl1	0.170676	0.461663	0.300689	-0.00298202	0.06184	0.38447	0.251261	0.181225	-0.114189	0.123431	0.195523	-0.136685	-0.186285	-0.313896	-0.301536	-0.0640173	-0.210772	0.105221	0.000248769	-0.210379	0.201728
Baz1b	-0.0572671	0.461004	0.260051	-0.185106	0.000696233	0.0113572	-0.203263	0.175227	-0.632413	0.244609	0.113435	-0.357325	-0.196174	-0.226094	0.248902	-0.095688	0.230582	0.156113	0.269942	0.0379593	-0.468077
Tango2	-0.163448	0.459541	0.208868	-0.117192	0.017262	0.0457563	0.0345865	0.158498	-0.0825767	0.129804	0.155073	-0.148076	-0.00399641	-0.101083	0.163367	-0.132316	0.000542222	0.0952203	-0.222462	-0.153977	-0.120377
Ddx52	0.13524	0.459358	0.186351	0.164235	0.287153	0.0763137	-0.174122	-0.164695	-0.129095	-0.078406	0.0939592	0.076461	-0.145593	-0.184243	-0.124739	-0.2022	-0.0990099	0.10146	-0.0897231	0.264397	0.00462706
Lin37	0.267888	0.457852	0.0779593	0.237071	-0.351926	0.121812	0.194972	0.298189	0.110365	0.0441232	0.13981	-0.101778	-0.103304	-0.221744	-0.0614258	0.0146746	-0.124672	-0.398845	-0.321025	0.0504597	-0.00959217
Eps15l1	0.168789	0.456748	0.317072	-0.145714	0.212445	-0.0187276	0.0683001	-0.135481	-0.493686	0.117337	0.047485	-0.107658	-0.118706	0.0540535	-0.143433	-0.0123034	-0.0701913	0.095984	0.161333	-0.0176755	-0.177448
Rps21	0.408232	0.452231	-0.291428	0.442398	-1.062	-0.362378	0.308132	-0.254767	-0.333959	-0.355766	-1.10981	-0.06937	0.0288511	-0.297361	-0.0621997	-0.377951	0.320032	0.0904354	-0.467715	0.202839	0.167367
Luc7l	-0.0407695	0.445745	0.144533	0.261671	0.0304064	0.0935276	0.170426	-0.00684538	0.395388	-0.274094	0.116056	-0.210543	-0.249343	-0.0455691	-0.14064	0.157552	0.18574	-0.0436067	0.157257	-0.0661885	-0.57727
Mtfr1	0.300709	0.439269	0.19842	-0.162348	0.250468	0.020539	0.26269	0.0966367	0.142552	-0.0232675	-0.219463	0.114757	0.0701396	-0.466808	-0.000282693	-0.187354	-0.143446	-0.282706	-0.196368	-0.453679	-0.652481
Fgfr1op	0.356578	0.438307	0.420768	-0.00600225	0.376533	0.309105	0.0675471	-0.0605651	0.00804491	-0.184565	0.0987427	-0.148941	-0.179154	0.0384913	-0.0859149	0.0409478	-0.0727933	-0.0820547	0.246879	-0.017244	-0.335368
C2cd3	-0.0940747	0.437407	0.156521	0.194256	0.288767	0.0616479	0.123897	0.0161303	0.1075	0.0934443	-0.0959356	-0.102601	-0.164725	0.0869257	-0.0189637	-0.0357367	-0.0418292	-0.0859317	-0.0643339	-0.0212045	-0.185363
Ppfia1	0.397817	0.429702	-0.27162	-0.365285	0.0996603	-0.374008	0.167233	-0.0120418	0.0979002	0.0836769	0.0825362	0.0563686	-0.0883098	-0.128407	0.0244758	0.0827162	-0.00144691	-0.466748	0.104009	-0.300087	-0.388173
Cnot11	0.0861252	0.429489	-0.0436867	-0.294612	-0.0383956	-0.333928	-0.104792	-0.150749	0.202508	0.0204237	-0.00639877	-0.0178163	0.0343266	0.207973	0.210661	0.161526	0.0378887	-0.0871037	0.151887	-0.14657	-0.201846
Nrde2	0.0979179	0.427848	0.00443987	0.136006	0.342585	0.0824081	0.0995868	-0.028705	-0.126887	0.150891	-0.0576206	-0.10602	-0.138251	-0.0843849	-0.0625331	0.0628315	-0.0251034	-0.0154882	-0.0684095	-0.149823	-0.128294
Tmco4	0.164774	0.422628	0.0184607	-0.0650091	0.409615	0.377437	0.306433	0.197955	-0.114635	0.332006	0.12508	-0.195414	-0.103486	-0.203088	-0.250843	-0.124835	-0.196235	-0.178808	-0.10202	-0.0754845	-0.0305209
Supt6	0.38932	0.402922	-0.0017645	0.0909818	0.279646	0.0532605	-0.205334	-0.208746	-1.24967	-0.341345	-0.221209	-0.233578	-0.217529	0.378708	0.0336159	-0.187614	0.402627	-0.183211	0.194066	0.0356781	-0.567665
Trp53bp1	0.349709	0.402479	0.213827	0.00301138	0.179192	0.279101	0.0311655	-0.0475971	-0.107261	0.12687	0.182181	-0.191272	-0.0446229	-0.226141	0.0545361	0.118246	-0.117563	0.106025	0.162902	-0.173639	-0.242325
Phkg2	0.2634	0.400745	0.139803	0.0484973	-0.0518788	0.32071	0.0810044	0.218619	-0.038618	0.0721846	8.34149e-05	-0.196819	-0.266131	-0.0849198	-0.193102	0.145647	-0.0654858	-0.0388004	0.195963	0.0580359	-0.0712954
Mlx	0.190301	0.391733	0.37105	0.112594	-0.163999	0.217844	0.302246	0.270717	-0.100788	0.00588036	-0.227251	-0.114074	-0.0559728	-0.269174	-0.166376	-0.287277	-0.153958	-0.0985069	-0.37627	0.0554174	-0.0195232
Vprbp	0.274683	0.390901	0.163453	0.0252963	0.326026	-0.00666041	-0.0715997	-0.102139	-0.278159	-0.103786	0.262362	-0.0538848	0.0351297	0.131299	0.0312018	-0.118602	-0.0824712	-0.0248071	0.286244	-0.071703	-0.26651
Zfp110	0.17209	0.38784	-0.0309301	0.0375224	0.342646	-0.198819	0.0940049	0.00574997	-0.414589	0.195611	-0.0195884	-0.0225363	-0.0973355	0.153819	-0.0648479	-0.248817	-0.0127222	-0.149023	-0.254582	-0.263991	-0.0267769
Slc12a7	0.0905295	0.38431	0.0616498	0.0419315	0.167169	-0.140276	-0.0882515	-0.0889228	-0.159166	0.122558	0.296137	-0.0537642	0.101699	-0.168741	0.0523601	-0.00350784	-0.132878	-0.0956247	0.0574103	0.266917	-0.0194511
Ctu1	0.176815	0.382833	0.298183	0.0235239	0.371281	0.0704907	0.0584346	0.164069	-0.136145	-0.0376017	-0.0151309	-0.106549	-0.101286	-0.0912264	0.0585799	-0.130399	-0.101946	-0.0530755	0.0317506	-0.0426253	-0.023481
Cradd	0.140312	0.374952	0.345862	-0.0111695	-0.227616	-0.0114444	0.135106	0.32271	-0.212423	0.0376504	-0.104895	-0.116732	-0.173125	-0.220775	-0.0895026	-0.0514613	-0.0194373	-0.170385	-0.0814484	0.0632499	-0.113159
Zfp768	0.0233234	0.370708	0.0280355	0.196264	0.210486	0.109879	0.160518	-0.119972	-0.268336	0.0964398	0.0145644	-0.109375	-0.0686643	-0.0612467	-0.119608	-0.135555	-0.0779218	0.0651429	0.244716	-0.0422959	-0.191108
Tubgcp2	-0.177313	0.368281	-0.0121474	-0.120165	0.132022	0.149806	-0.145278	0.0589277	-0.0789551	0.0192758	0.24769	-0.0357538	0.0283863	0.0671957	-0.013556	0.0660416	-0.123099	0.140408	0.328947	0.21906	-0.104608
Hps3	0.0235146	0.365026	-0.0655838	0.0110254	0.0664371	0.0480723	0.0647421	0.0851188	-0.190908	0.058494	0.141723	-0.0708275	0.0113516	-0.0820357	0.0357025	0.0876343	-0.10653	-0.0241113	-0.12455	0.0990673	0.0949897
Sugp2	0.126735	0.360729	0.19507	-0.0607591	-0.266548	0.274599	0.0347165	0.0960351	-0.172668	0.104294	0.00225437	-0.0414626	-0.0970947	-0.111362	-0.194424	-0.0686182	-0.10243	-0.0236078	0.183222	0.0101563	-0.20693
AW209491	0.221865	0.356959	0.034207	0.145274	0.0284678	0.116523	0.134114	0.17094	0.0186379	0.0190376	-0.0729784	-0.152496	-0.0361171	0.0540626	-0.186695	-0.0239974	-0.0404255	-0.0584264	0.0251243	-0.162423	0.144826
1810013L24Rik	-0.183137	0.355374	0.303734	-0.57766	-0.231077	-0.0506563	-0.256964	-0.15096	-0.418903	0.253313	0.0971182	0.0568513	-0.0948526	0.31271	0.106195	0.168879	0.0286096	-0.395647	0.172902	-0.0110931	-0.21293
Sat2	0.140677	0.354484	0.193364	-0.030591	-0.0072696	-0.0467674	-0.0914061	0.0404207	0.157661	-0.185145	-0.212298	-0.176127	-0.126777	-0.0942972	0.0982884	0.0342598	0.209257	0.13395	0.140698	-0.180276	-0.18842
Cyb5r1	0.153853	0.349884	0.303869	-0.0657495	0.258386	-0.0947225	0.322163	0.193253	0.162341	-0.0476854	-0.0528744	-0.0786875	-0.117138	-0.293036	-0.0944845	0.10857	-0.131229	-0.132918	-0.217281	0.0265642	-0.0885601
Asna1	-0.0281894	0.34987	-0.00867769	0.0493978	-0.00249661	-0.0399596	0.173696	-0.0402404	-0.388653	0.311774	-0.0618588	-0.258761	-0.272644	0.100104	0.155399	-0.40357	0.0477339	-0.0582339	-0.0942946	0.0268071	0.18593
1700037C18Rik	0.267056	0.341114	0.0798264	0.160462	-0.110218	0.187277	0.334662	0.133603	0.0763608	-0.0467093	-0.148484	-0.0735059	-0.103462	-0.191923	-0.225486	-0.156768	-0.112868	-0.0973159	0.0261045	-0.167942	-0.121162
Ciz1	0.132009	0.340924	0.181645	-0.0327504	0.170842	0.0123376	0.0472131	0.188492	-0.322029	0.0899491	0.00468094	-0.0634602	-0.216017	-0.223494	-0.106565	-0.324409	-0.0286249	0.0226114	0.175189	-0.0141672	-0.0505359
Gba2	0.212401	0.337333	0.0239571	-0.00211221	0.0455429	0.102245	-0.0129389	-0.0235373	-0.101001	0.0698897	-0.15126	-0.0620038	-0.0436573	-0.0498287	-0.0761435	-0.0641747	-0.0353149	0.0163966	0.115828	0.00432674	-0.0283819
Gemin2	0.0765547	0.328016	0.11762	0.263066	-0.021599	0.124427	0.146624	0.222373	0.265761	0.0162721	-0.0507404	-0.104929	-0.0816113	-0.151747	-0.167461	-0.0886873	-0.0692105	0.00452314	-0.166534	-0.0339666	0.0819507
Tnks	-0.10424	0.323148	-0.112417	-0.0914405	-0.206357	0.118816	0.0701976	0.143886	0.0638723	0.192892	0.276159	-0.0802927	0.0722291	-0.0378865	-0.0244157	-0.0479233	-0.0161217	-0.224716	-0.182105	-0.0382794	-0.140735
Shoc2	0.185491	0.322284	-0.0171375	-0.412112	0.0526991	0.0284664	-0.0261548	0.00491112	0.182023	0.0431269	0.0768787	0.118741	0.148247	-0.413567	-0.064418	-0.34339	-0.0612822	-0.0393876	0.0730089	-0.0270989	-0.457418
Mnat1	0.0114622	0.321818	-0.107244	-0.15207	-0.361774	-0.195103	0.242668	0.296844	-0.22728	0.0398938	-0.0508273	-0.0722138	-0.318119	-0.310222	-0.355388	0.0144096	0.0440397	0.219028	0.28948	-0.0704091	-0.24867
Mtrr	0.171395	0.315108	0.0128336	-0.175272	0.123104	-0.0700341	-0.00566075	0.15931	-0.258905	0.0135716	0.131558	0.0270641	-0.0652662	-0.00526386	0.0341329	-0.13767	-0.106454	0.0688975	0.0116511	-0.0558771	-0.142203
Ogg1	-0.0910491	0.311912	0.188289	-0.100319	-0.128336	-0.025782	0.0682529	0.0676057	0.184339	0.101651	-0.0274139	-0.123005	0.0109395	-0.0117977	0.00725049	-0.0419748	-0.0136068	0.0263009	0.0791141	-0.05044	0.0553756
Ddx19a	0.113246	0.308052	0.177246	-0.0128225	-0.0837745	0.0953732	0.0420039	0.182307	0.164363	-0.0946481	0.142768	-0.125432	0.115824	0.114087	-0.105729	-0.307492	-0.0173117	-0.0867764	0.157903	0.03494	-0.224157
Mynn	0.120071	0.30358	-0.0638798	-0.145323	0.213972	0.175759	-0.118895	-0.00829633	-0.15539	-0.0387222	0.00379293	-0.152667	-0.107171	0.0847309	-0.0334998	-0.0204324	0.113554	-0.0919022	0.144195	0.241787	-0.00479003
Urb2	0.243468	0.299671	0.208253	0.0358605	-0.00222515	0.264623	-0.0139924	-0.0914942	-0.154254	-0.0269448	-0.113652	-0.0462956	-0.0383578	0.0262972	0.0799863	-0.107487	-0.136611	-0.0533395	0.118458	0.0545905	-0.0902046
Gpc2	0.207369	0.296845	-0.206693	-0.0568301	-0.00985296	-0.057106	-0.0379043	-0.0583088	-0.0544429	0.0785929	0.267369	0.0116197	0.152048	-0.0601402	-0.0638079	0.0454127	-0.123839	-0.0270308	0.156213	-0.00974068	-0.0866824
Rxra	0.202531	0.290605	-0.177594	0.000335951	-0.0303823	0.236027	0.0337925	-0.0143824	-0.0095558	-0.0544752	0.123273	-0.0363868	-0.191006	-0.136635	0.116845	-0.0565271	-0.0690574	0.00599416	0.0765861	0.0280938	-0.0271313
Zfp788	-0.104923	0.29001	0.199653	-0.223065	-0.0734916	0.063013	0.250404	0.243414	0.000837225	-0.00310013	-0.19356	-0.231325	-0.165137	-0.282505	-0.0740305	0.125299	0.11027	0.0179063	0.1454	-0.146409	0.0501627
Uevld	0.0297352	0.274978	-0.0930187	-0.107548	-0.00765208	-0.0105905	0.013311	0.198662	0.200464	0.203469	0.0132719	-0.0270182	-0.11971	-0.0664024	-0.129514	0.152895	-0.0549427	0.110126	-0.088252	-0.0516015	-0.137242
Ints5	0.197843	0.274842	0.168791	0.00693934	-0.104669	0.129651	-0.0866347	-0.0672581	0.238152	-0.0559008	-0.0616939	-0.103001	0.0217058	-0.0370415	-0.00196213	0.0705993	-0.0393935	-0.00185365	0.113583	0.244739	0.112304
Cep104	-0.0498515	0.274568	-0.0230979	-0.147878	0.104241	0.0868636	-0.0643503	-0.146447	0.00163214	-0.0244146	-0.248388	-0.139634	0.146826	0.0297081	-0.0888578	0.136381	0.157812	0.0956463	0.257762	-0.0847863	-0.129971
Cabin1	-0.0636094	0.270121	0.0830312	-0.0599769	0.185076	-0.103784	-0.0276984	-0.131908	-0.382898	0.0100611	-0.171111	-0.109561	-0.0863162	0.00951756	0.02323	0.223469	0.0925949	0.0436902	0.165016	0.0808193	0.079976
Tbc1d32	-0.0573421	0.264659	0.108977	0.121843	-0.158808	0.0470003	0.0784762	0.0625771	0.0694006	0.19228	-0.0459083	-0.112914	-0.0671823	-0.0866842	-0.147626	-0.143149	-0.0231153	0.0622632	0.147747	0.00342228	-0.073196
Tmem69	0.200507	0.261663	0.0923336	0.0775962	-0.150241	0.180763	0.15669	0.17234	-0.235741	-0.0271333	-0.144095	-0.0905187	-0.126022	-0.122319	-0.114814	-0.0771693	-0.0120801	-0.12184	0.13135	-0.0866978	-0.0992697
Mief2	0.0772163	0.261213	0.160024	0.0375074	0.00963259	0.236829	0.035389	0.145793	0.219157	-0.0414991	-0.157071	-0.0895985	-0.130712	-0.0325878	-0.00323389	-0.0978764	0.0299079	-0.0449903	0.0120487	-0.125657	-0.149527
Ptar1	-0.037788	0.258567	-0.196014	-0.154815	-0.0195145	-0.025661	-0.0554485	0.117137	-0.135852	0.00657544	-0.079006	-0.102846	-0.133095	0.0329231	0.0376549	-0.096202	0.184704	-0.0982566	-0.14193	0.117804	0.0993824
Dbr1	0.0664925	0.23576	0.136843	-0.113271	0.181119	-0.143273	-0.192094	0.230688	0.0217998	0.0367034	-0.27114	0.162964	-0.0401919	0.1355	-0.0316215	-0.0138705	-0.107219	-0.221327	-0.0887217	0.0116915	0.0778914
Bccip	0.0246741	0.231169	0.212153	0.0122829	-0.384147	-0.308858	0.0737481	0.0468804	0.229658	-0.225169	-0.512818	-0.130934	-0.219232	-0.0300374	0.175232	-0.0704089	0.221092	0.108896	-0.185995	0.0919065	-0.2308
Tmem260	0.128916	0.228159	0.118219	0.0704047	0.178366	0.16285	0.14399	-0.0165248	-0.151194	0.0641548	-0.106627	-0.058959	-0.0223868	-0.0951956	-0.0366634	-0.0599373	-0.0928008	0.0212065	-0.10325	-0.0684902	-0.163202
Wwox	-0.155485	0.218275	7.29181e-05	-0.0323908	-0.252019	0.0672542	-0.0710643	-0.11734	-0.180611	0.171651	-0.0219638	-0.0169892	-0.0628801	-0.0225922	0.111949	-0.0829022	0.0501088	0.00136561	-0.150368	0.00926663	-0.0217318
Dclre1a	0.110264	0.21805	-0.00327809	-0.0363162	0.0469812	-0.0257722	0.0464258	0.128007	0.0515031	-0.0456142	-0.144746	-0.0332368	-0.0850119	-0.114984	0.0216998	-0.0787752	0.0268239	-0.0382914	-0.0157872	-0.0662747	0.0558698
Kbtbd4	-0.0395279	0.188405	0.146483	-0.124932	0.0229206	0.0986956	0.008501	0.0299994	0.168998	0.125618	-0.122365	-0.0778572	-0.076811	-0.140797	-0.000501969	-0.0663577	0.00538767	0.0406939	0.0353571	-0.0513637	0.183908
Mycl	-0.00918787	0.183465	-0.211796	-0.130805	-0.205882	-0.0651942	-0.0150703	-0.0415781	-0.0588298	-0.169726	-0.117926	0.163611	0.156525	0.0841251	-0.0713555	0.0019406	0.0588125	-0.0692416	0.00624691	-0.139891	-0.101508
Spint4	0.226164	1.29646	4.13695	-0.0606509	-3.04285	0.112713	0.0598838	-0.0116665	-0.0108982	-1.01084	-1.47434	-1.04301	-0.987039	-0.0856626	-0.0634848	-1.02582	-1.3686	-0.0107293	-0.0555767	-0.654213	-0.402343
Spint5	-0.231169	0.755206	3.91204	-0.092532	-0.920198	0.0827566	0.0416857	-0.00144104	-0.00134835	-0.69627	-1.1567	-0.933154	-0.959764	-0.0716391	-0.058773	-1.23711	-1.41172	-0.00119731	-0.0534738	-0.524073	-0.424376
Dapl1	1.90821	-1.75923	3.07371	1.02653	0.994974	-0.235451	0.0114008	-0.011898	-0.0111402	-0.983812	-0.882216	-0.96227	-0.759115	-0.0896826	-0.0709559	-0.833484	-1.2898	-0.121138	-0.150791	-0.3971	-0.420715
Acbd7	0.703952	-0.117861	2.91885	2.61143	1.00346	0.637949	2.3385	1.37334	0.154347	-2.16381	-2.02662	-2.36743	-2.89493	-3.21999	-3.74717	-2.25545	-2.66264	-3.71102	-3.02737	-2.86173	-3.8547
Wfdc13	-0.378626	0.715282	2.81401	2.35953	1.30404	-0.448503	-0.0550348	-0.00810861	-0.00759818	-1.23028	-1.71163	-1.31032	-1.50063	-0.161076	-0.116024	-2.02119	-2.16846	-0.230096	-0.347317	-0.620246	-0.829049
Wfdc16	-0.00505057	-1.54928	2.71898	1.70336	1.91248	1.77694	-0.407644	-0.0314157	-0.0652632	-2.11782	-1.95921	-1.41251	-1.64296	-0.638164	-0.58201	-1.72612	-2.18253	-0.806037	-0.413636	-0.875409	-0.824283
Gstm6	1.46735	0.219702	2.56191	0.497685	1.74171	0.550759	0.236908	0.17654	-0.140929	-0.36362	-0.996957	-0.9527	-0.824844	-0.0879151	-0.149044	-0.966068	-1.12959	-0.177589	-0.188579	-0.635556	-0.561449
Scp2	0.384393	0.405973	2.49038	1.37322	1.0413	0.464589	0.638935	0.553361	-0.36194	-0.16565	-1.26674	-1.12379	-1.07804	-0.153425	-0.286362	-0.937861	-0.639019	-0.0752759	-0.107723	-0.767394	-0.770619
Defb38	0.31215	-0.895444	2.47137	2.17543	1.94522	0.107957	-0.0396973	0.0348831	-0.0323688	-1.47831	-1.55914	-1.08979	-1.44827	0.0167686	-0.140866	-1.77023	-1.82848	-0.244721	-0.312901	-0.542523	-0.845941
Psph	0.327056	0.216428	2.32404	1.71213	1.23375	1.09364	0.665627	1.39088	0.169246	-1.1663	-0.682468	-0.66588	-0.945975	-0.687688	-0.982356	-0.743391	-1.06318	-1.25288	-0.44879	-0.82625	-1.41896
Alad	1.06546	0.592504	2.18423	0.88008	1.86231	2.06264	1.45279	1.43279	1.02693	-1.04924	-1.63217	-1.48026	-1.70777	-2.14933	-2.15527	-1.70981	-2.44781	-2.07061	-1.76006	-1.38562	-1.94992
Mtch1	0.694182	0.120531	2.12559	0.598455	2.09642	1.22906	0.577363	0.251154	0.254446	-0.165836	-0.95741	-1.23736	-1.20337	-0.458783	0.215117	-0.127502	-0.655663	-1.35946	-1.05914	-0.410046	-1.40625
Ndufb7	0.900334	0.593176	2.11394	1.36045	1.11184	0.0589946	1.22617	1.0968	0.0996993	0.452618	-1.2501	-1.77207	-1.63612	-1.8213	-1.81213	-1.27952	-1.07297	0.888912	0.254621	-0.891513	-0.900749
Gstm7	1.40187	1.30814	2.08774	1.3536	1.53413	1.50351	0.0967855	-0.0628654	-0.408667	-0.319608	-2.58878	-1.7925	-1.71664	-0.400955	-0.582888	-2.11137	-2.79192	-0.7556	-0.713878	-1.16226	-1.29141
Zcchc17	0.92061	0.323382	2.04329	1.68072	1.37365	1.0753	1.08405	0.904542	0.362307	-0.940179	-0.277886	-1.36141	-1.18665	-0.515873	-1.00095	-0.814967	-0.805671	-0.23367	-0.135217	-0.514114	-1.50191
Smarcd3	0.614773	0.681881	2.03356	1.20017	1.57898	1.53351	-0.981307	-1.03278	-0.792188	-0.733084	-1.42663	-1.4056	-1.34676	-0.748196	-0.120325	-1.24717	-0.463626	1.43238	1.0609	-1.25218	-1.56275
Gamt	0.858965	1.86252	2.02443	1.33879	1.06629	0.843337	0.594549	0.477371	0.684119	-1.26045	-1.10238	-1.3898	-1.38914	-0.697437	-0.457701	-1.0529	-1.35367	-0.224067	-0.0667587	-0.88656	-0.773927
Dcxr	0.459547	0.941934	1.99618	0.449972	1.15687	0.0599107	1.54289	1.33823	0.610251	1.23289	-0.503794	-0.859745	-0.860217	-1.38653	-1.56881	-1.16432	-1.65327	-1.35383	-1.29042	-1.15763	-0.536678
Isg20	-0.112609	1.88188	1.9676	1.75104	1.27429	1.24096	-0.483269	-0.844643	-0.725862	-1.24345	-0.676156	-0.50416	-0.366286	0.103664	0.768845	-1.57516	-1.69847	-1.43975	-1.37989	-0.559271	-0.831946
Abca4	0.00571714	-0.440538	1.95089	-0.0340473	0.694286	-0.0226921	-0.0165244	-0.0111296	-0.0104291	-0.150778	-0.223722	-0.262701	-0.31247	-0.0325993	0.0198724	0.0537766	-0.41274	-0.0112254	-0.0285311	-0.158615	-0.0437888
Acot9	-0.507543	-0.518123	1.93212	0.988684	1.92627	1.14543	-0.283324	-0.15324	-0.502713	-0.960125	0.193797	-0.184361	-0.100418	0.326429	0.330423	-0.906364	-1.07386	-0.849823	-0.307693	-0.264185	-0.968052
Adig	0.969982	-0.329627	1.92735	0.71141	1.72983	1.864	0.390279	0.389426	0.188727	-0.827925	-0.59595	-0.981756	-1.12715	-0.490856	-0.472225	-1.15953	-0.992745	-0.543929	-0.629422	-0.715257	-0.84597
Hsph1	0.603296	-0.069509	1.90699	0.875474	1.69383	0.242969	-0.234864	0.0854553	-0.482938	-0.934447	-0.503277	-0.740168	-0.668966	-0.205889	0.450963	-0.31476	-0.559205	-0.164216	-0.0791062	-0.329136	0.149387
Hist1h4i	1.0449	1.37307	1.89627	0.714112	0.853274	0.956045	0.849455	0.602043	-0.393202	-0.600364	-0.667955	-1.00051	-0.986484	-0.750204	-0.508349	-0.748304	-1.10411	-0.627129	-0.255371	-0.784109	-0.498028
Txnip	-0.133505	-1.06434	1.8934	1.51057	1.66937	1.03577	0.196221	1.10021	0.0937431	-0.191198	-0.603527	-1.5077	-1.84748	-1.01725	-1.68079	-0.149251	-0.540871	0.542389	0.814003	-0.142702	-0.920471
Akr1c19	0.381202	-0.70601	1.88434	1.27862	1.81818	1.45741	-0.0980196	-0.118337	-0.217375	-0.95491	-0.51457	-0.73987	-0.653406	-0.280057	-0.27056	-1.1	-1.01243	-0.436788	-0.332074	-0.520678	-0.556551
Acat2	1.10862	0.727621	1.8412	1.1145	1.41964	1.42097	0.803935	0.638242	0.727942	-0.707946	-0.459059	-0.848482	-1.04471	-0.658178	-0.628476	-0.679705	-0.80719	-1.06909	-0.750963	-0.679683	-1.09386
Odam	0.260054	-0.736217	1.83579	0.642814	0.971364	0.300317	0.128552	-0.0142208	-0.0365218	-0.221474	-0.167091	-0.404105	-0.488983	-0.0732628	-0.0745372	-0.147521	-0.487418	-0.091035	-0.105452	-0.167776	-0.272091
Clic3	0.732365	0.5132	1.80548	1.1641	1.33164	1.7686	0.115629	0.0615638	-0.46541	-0.738753	-0.708817	-0.86253	-0.881882	-0.306739	-0.47634	-0.870503	-1.06402	-0.582319	-0.412965	-0.42406	-0.705301
Coa3	0.710117	1.09703	1.78914	1.33307	0.533889	0.259578	1.70041	1.31518	0.62058	0.567558	-0.704625	-1.30687	-1.26696	-1.8563	-1.33324	-0.758135	-1.19427	-0.620381	-0.920862	-1.03523	-0.968595
Snx5	1.23492	1.08297	1.78154	0.80706	1.77132	0.782655	0.513684	0.735553	0.63354	0.113449	-0.499758	-1.20993	-0.965775	-0.410588	-0.427783	-0.549525	-1.13273	-0.595988	-0.195466	-0.593548	0.935004
Nrgn	-0.0125448	-0.634493	1.76599	0.345738	0.717822	0.116994	-0.24716	-0.244433	-0.229869	-0.0256459	-0.217103	-0.349312	-0.234379	-0.258358	-0.225155	-0.379853	-0.200936	-0.245343	-0.25965	0.799207	-0.35228
Akr1c13	0.415433	-0.32478	1.74523	1.51141	0.925415	1.53046	0.432585	0.245416	-0.435095	-0.709643	-0.453441	-0.632282	-0.629803	-0.282034	-0.486105	-0.849565	-0.845934	-0.693611	-0.378091	-0.475629	-0.424708
Hspd1	1.03857	-0.169444	1.74414	0.212765	1.45937	0.710668	-0.232663	-0.0582797	0.246434	-0.791136	-0.434279	-0.399885	-0.654357	0.723048	-0.169655	-0.340271	-0.414612	-0.111063	0.163516	-0.406359	-0.454344
Rnaseh2c	0.90153	0.221312	1.74176	0.976983	1.22993	0.128551	0.382453	0.471971	-0.0998562	-0.386862	-0.282774	-0.707555	-0.488229	-0.52486	-0.194288	-0.2388	-0.498802	0.289047	0.0957592	-0.381635	-0.553262
Asb11	0.403816	1.26861	1.72966	0.976785	1.35542	0.888769	-0.0579915	-0.0351317	-0.0329189	-0.623457	-0.631728	-0.627787	-0.519797	-0.0850708	-0.0451728	-0.384345	-0.707235	-0.162655	-0.0657562	-0.456496	-0.416968
Scand1	1.13236	0.364405	1.72618	1.05561	1.04606	0.569304	1.23069	0.727075	0.273205	0.404638	-1.06318	-0.716602	-0.851001	-0.895115	-0.758151	-1.05484	-1.17196	-0.539758	-0.884908	-1.39	-0.53404
Adh5	-0.248127	0.410926	1.72543	1.58516	1.1062	1.47592	0.705221	1.39166	0.902287	-0.127867	-0.30455	-0.768733	-0.794417	-0.922625	-0.974458	-0.765763	-0.90099	-0.801092	-0.647745	-0.975933	-0.901982
Mal	1.32947	1.47667	1.71231	0.0303194	0.456365	0.595286	1.52679	1.27241	0.602476	1.02056	-0.781638	-1.33082	-1.00748	-1.52201	-1.62102	-1.12594	-1.20616	-1.71045	-1.53778	-0.0620696	-1.2786
Cox14	1.02054	0.225346	1.68949	1.01311	0.493108	0.433373	1.12497	0.616545	0.300551	0.340529	-0.722854	-1.14456	-1.38987	-1.67149	-1.19435	-1.06645	-0.707245	0.869777	0.215436	-0.813293	-1.42157
Pank1	0.788498	0.567876	1.67055	0.303161	1.57924	0.365698	0.355313	0.753266	0.499331	-0.368199	-0.438431	-0.6972	-0.711645	-0.0972856	-0.199401	-0.109197	-0.544637	-0.253049	-0.0903997	-0.437944	-0.665185
Thrsp	0.215274	-0.130083	1.66155	0.357859	1.02961	0.227503	0.000266385	-0.0803893	-0.0754412	-0.354122	-0.407387	-0.325917	-0.150798	-0.106195	-0.110641	-0.230721	-0.430946	0.0781253	0.149197	-0.0444285	-0.260138
Mkrn1	0.0339716	0.562825	1.65465	0.922049	0.813399	1.23752	0.421262	-0.137203	-0.615634	-0.688674	0.146738	0.397092	0.104824	-1.19047	-0.885996	-1.10288	-1.5963	-0.683077	-0.371643	-1.08438	0.075299
Prr27	-0.0510153	0.42567	1.6426	0.285771	1.37026	0.161424	-0.00713876	0	0	-0.210446	-0.373052	-0.376921	-0.134411	-0.0304237	-0.0316038	-0.0550753	-0.450536	-0.0400501	-0.0546634	-0.177377	-0.182522
Rrm1	0.0849422	-0.27102	1.63603	0.493083	0.983325	0.366229	0.207085	0.265401	0.299803	-0.436026	-0.272887	-0.460885	-0.509633	-0.0969647	-0.154914	-0.183025	-0.122397	-0.141829	0.163852	-0.184843	-0.367747
Flywch2	0.202478	0.19959	1.63253	0.989184	1.37283	0.244089	0.669478	0.393544	-0.627061	-0.127202	-0.369715	-0.406341	-0.429163	-0.605311	-0.25869	-0.0717262	-0.534795	-0.260926	-0.421248	-0.537736	-0.698759
Mrps21	0.835944	0.601556	1.60813	0.982797	0.809491	0.53237	1.39772	0.76314	0.5936	0.190697	-0.441759	-1.57933	-1.44881	-1.54811	-1.40066	-0.932202	-0.834755	1.08009	0.131705	-1.09626	-1.57117
Car2	0.00846422	-0.876638	1.59963	0.0342475	1.12837	-0.822215	-1.12889	-1.0592	-1.01136	0.625661	0.213215	1.46966	0.437992	-1.09579	-1.07063	-1.38693	-1.70737	-1.13064	-0.994636	0.387476	-0.99121
Stard10	1.38005	1.12101	1.58736	1.18024	0.961907	1.1999	1.33717	1.28152	0.508702	0.62099	-0.987786	-0.951905	-0.99181	-1.3106	-1.33249	-1.07737	-1.55042	-1.53114	-1.49971	-1.3417	-1.41045
Defb14	0.0646357	-0.06371	1.57974	0.733678	1.00163	0.405704	-0.00690217	-0.00999846	-0.00936938	-0.284818	-0.449146	-0.3022	-0.346559	-0.0420821	0.0211811	-0.397832	-0.413633	-0.0945871	-0.10252	-0.185417	-0.172527
Tmem167	1.14209	0.844209	1.57365	0.722198	1.31044	0.798068	1.09095	0.699661	0.923966	-0.538138	-0.209069	-1.17084	-1.01113	-0.136533	-0.196819	0.117313	-0.895618	-1.37009	-0.310194	-0.940488	-0.909766
Mum1l1	-0.0848688	-0.427024	1.54766	0.657749	1.52046	0.859569	0.0974014	-0.0434895	0.133476	-0.915706	0.581607	0.500938	0.118889	-0.490761	-0.459757	-0.919993	-1.033	-0.662379	-0.461329	-0.842073	-1.1269
Dpm3	1.00745	1.5168	1.53226	1.06942	1.29597	1.39631	1.28142	0.846005	0.505169	-0.799351	-0.306534	-1.41297	-1.32138	-1.28682	-0.663092	-0.41437	-0.953746	-0.147116	-0.783347	-0.914565	-1.20227
Hddc3	0.0882326	-0.0199072	1.52599	0.824013	1.16665	0.533966	1.27171	1.14681	0.0422181	0.197945	-0.599155	-0.662734	-0.68152	-1.20129	-0.86728	-0.334906	-0.668575	-0.681536	-0.670729	-0.551861	-0.544661
Ap2s1	0.844474	0.635595	1.51428	0.464891	0.654118	0.27442	1.00189	0.80169	0.259587	0.257507	-0.672621	-0.659013	-0.563964	-0.782134	-0.679952	-0.488529	-0.633545	-0.509404	-0.507652	-0.339477	0.00192373
4930426D05Rik	-0.13229	0.85445	1.50989	1.2942	1.37481	0.754106	0.782856	0.566128	0.703907	-0.53238	-0.545591	-0.58314	-0.598652	-0.531418	-0.445312	-0.420942	-0.70885	-0.587231	-0.369591	-0.474698	-0.628518
Cyb5b	0.909638	0.149807	1.46883	0.830762	1.4328	1.1514	0.997073	0.835808	-0.259971	0.0681417	-0.879569	-0.997536	-0.861035	-1.07678	-0.772714	-0.782282	-0.560208	-1.05589	-0.477319	0.0294193	-0.743396
Cdc37l1	0.880605	0.458644	1.4667	1.10417	1.04851	0.651472	-0.0533029	0.186656	-0.270927	-0.264923	-0.68264	-0.615516	-0.22851	-0.272006	-0.0839015	-0.204623	-0.181041	-0.390729	0.290331	-0.496853	-0.872547
Sult2b1	0.487755	0.20447	1.46284	1.18588	1.10322	1.38896	0.81327	0.54456	0.422902	-0.851503	-0.291967	-0.609215	-0.594596	-0.240216	-0.492318	-0.132574	-0.774412	-0.824623	-0.788669	-0.401213	-0.759656
Ech1	0.258051	0.0575569	1.45315	0.811566	1.16344	0.793688	0.603086	1.02594	0.805267	-0.61171	-0.416562	-0.957392	-0.977173	-0.8544	-0.918944	-0.344471	-0.204848	0.417878	0.83602	-0.530985	-0.893279
Lyplal1	1.05542	1.07069	1.43926	0.896505	0.99445	0.696863	0.685171	0.925122	0.694976	0.37615	-0.438036	-0.78411	-0.748582	-0.603287	-0.543397	-0.45419	-0.87988	-0.57794	-0.415513	-0.534364	-0.165091
Mrpl57	1.07268	0.78221	1.43836	1.13402	0.984403	0.795776	1.37238	1.09421	0.10295	-0.0418695	-0.813054	-0.961933	-0.86364	-1.07675	-1.2711	-0.742501	-0.889218	-0.179122	-0.251855	-1.0196	-0.749856
Tmem256	0.87939	0.670179	1.43355	0.470789	0.0325898	0.0183266	0.984637	0.64407	-0.729683	0.908759	-1.19948	-1.32262	-1.28821	-1.19385	-0.647851	-0.556905	-0.454113	0.765862	-0.135983	-0.525448	-0.448623
Tpmt	1.27417	0.223213	1.41487	0.613774	1.1884	0.69301	0.849349	0.88562	0.613724	-0.535735	-0.544131	-0.52837	-0.596156	-0.597801	-0.561376	-0.0534041	-0.544004	-0.623393	-0.472674	-0.764905	-0.541795
Psmd10	0.567217	0.35947	1.40248	0.781087	1.1385	0.331885	0.693665	0.934438	0.672266	0.271659	-0.299217	-0.346113	-0.390617	-0.836654	-0.771322	-0.708821	-0.636977	-0.391962	-0.671805	-0.574981	-0.229656
Rpl3l	0.55598	-0.0130017	1.40139	0.660633	0.94352	0.614346	0.333499	0.0495895	0.112745	-0.254252	-0.0416983	-0.404226	-0.360349	-0.209429	-0.222576	-0.299776	-0.470621	-0.217693	-0.152809	-0.249027	-0.182406
Rgn	-0.0704442	0.289126	1.39739	0.897004	0.938187	1.02865	0.0255715	0.109521	-0.0603856	-0.486148	-0.239858	-0.378019	-0.376107	-0.109222	-0.10954	-0.174559	-0.598606	-0.199546	-0.0496886	-0.305702	-0.293785
Sf3b5	0.6675	0.670976	1.39634	1.05377	1.32845	1.01647	1.0656	0.625521	0.135438	-0.290539	-0.211204	-0.789932	-0.942938	-0.663316	-0.798548	-0.471694	-0.887676	0.148471	0.0949404	-0.91423	-0.814494
Arfgap1	1.32208	0.808159	1.39369	1.03271	1.19599	0.433909	0.228879	0.329076	-0.230982	-0.406341	0.178284	-0.681938	-0.60572	-0.0464315	-0.359532	0.0456122	-0.61982	-0.313085	0.281659	-0.450368	-0.259193
Dcaf11	1.12092	1.27171	1.38728	0.700962	1.30188	1.23672	1.10351	0.841349	0.438397	-0.248477	-0.506649	-0.727177	-0.765558	-1.02739	-1.09879	-0.609381	-0.771126	-1.02787	-0.723792	-0.680303	-1.17111
1700011H14Rik	0.171914	0.64233	1.37306	0.313011	1.18446	0.179292	0.026848	-0.0225382	-0.0211213	-0.296381	-0.343563	-0.384052	-0.401383	-0.0531625	-0.0528506	-0.167761	-0.363231	-0.0167069	-0.0815869	-0.238048	-0.160201
Srm	0.662125	0.431567	1.36913	0.424632	1.32548	0.585032	-0.213893	0.149229	-0.653187	-0.924103	-0.165631	-0.342928	0.0464109	0.901626	0.793637	-0.10848	-0.600587	-0.649672	-0.150106	-0.292978	-1.1166
Ptpn6	0.180146	-0.1752	1.367	0.204111	0.776795	0.129682	0.433533	0.25594	-0.332631	0.018799	-0.0568641	-0.275172	-0.320923	-0.276688	-0.364072	-0.338372	-0.350439	-0.334087	-0.331045	-0.0915586	1.05279
Rhob	0.603674	0.373955	1.35572	0.5408	0.92072	0.470212	-0.868779	-0.454757	-0.274235	0.141623	-0.155402	-0.719492	-0.675318	-0.678168	-0.124909	0.0913495	-0.485329	-0.0255913	0.979643	1.16453	-0.216151
Cycs	-0.0173512	-0.493392	1.35515	-0.101985	-0.0176514	-0.582328	0.848922	0.447185	-0.342759	0.412821	-1.47789	0.166399	-0.0605733	-0.653835	-1.15057	-1.08033	-0.113925	0.44188	-0.770183	-0.647155	-0.91544
Map7d2	0.801902	0.61228	1.35365	1.34631	0.717831	0.560896	-0.192292	0.0149621	0.132226	-0.669109	-0.362527	-0.585144	-0.542251	0.0971382	0.0623312	-0.330497	-0.3755	-0.0074263	0.151899	-0.478995	-0.491528
Tmem234	0.824503	0.661184	1.35361	0.933224	0.901842	1.04619	1.20135	1.03773	0.45865	-0.0739377	0.110842	-0.541851	-0.59095	-1.15052	-0.90187	-0.470626	-1.51279	-1.11594	-0.357854	-0.524162	-0.481903
Hspe1	0.223382	-0.114978	1.35172	0.544317	0.422504	0.26073	0.479161	0.109952	0.293729	-0.580202	-1.17637	0.123614	0.00203039	-0.121163	-0.502	-0.953384	-0.38159	-0.0979915	-0.999671	-0.236341	-0.0780377
Polr2j	0.502967	0.743107	1.34737	1.11759	0.278629	0.332121	0.785396	0.395016	-0.113627	-0.279146	-0.271144	-0.414708	-0.478567	-0.445629	-0.695045	-0.633911	-0.454865	0.236138	-0.2289	-0.45682	-0.824847
Lage3	0.432864	-0.081753	1.33454	0.66866	0.42381	0.225149	0.905024	0.479835	0.0940657	0.273131	-0.457288	-0.634815	-0.659143	-0.845301	-0.319054	0.125158	-0.327257	-0.18492	-0.221239	-0.436199	-0.319016
Tpd52	0.815497	1.20401	1.319	0.396563	1.09693	0.434654	1.1945	0.96276	0.407246	0.355753	-0.257031	-0.134617	-0.106615	-1.73559	-1.96604	-1.31042	-1.65273	-0.995258	-1.06896	-1.13626	1.04565
Hint1	0.260235	-0.307859	1.3172	0.885693	0.297546	0.501919	0.733908	0.203921	0.000119385	-0.0775313	-1.52763	-0.00216351	-0.126828	-0.819924	-1.77304	-1.52771	-0.648419	1.06919	-0.598545	-0.341256	-0.145463
Actl6a	0.21636	0.52703	1.30829	0.231064	1.25462	0.312332	0.314528	0.297734	-0.0905923	-0.0402684	-0.191922	-0.330394	-0.261618	-0.082153	-0.242543	-0.19003	-0.329697	-0.173649	-0.0929887	-0.157568	-0.650759
Fam178a	0.507643	0.228719	1.30165	0.624997	1.28707	0.682142	0.326457	0.262171	-0.0552591	-0.403941	-0.181042	-0.354277	-0.209859	-0.517172	-0.0693318	-0.221911	-0.4603	-0.676867	-0.397757	0.0320018	-0.257067
Pole3	0.318713	1.08205	1.27481	0.332116	0.497711	0.319684	0.935099	0.993402	0.575038	-0.210555	-0.3897	-0.646229	-0.74113	-0.398126	-0.659568	-0.414299	-0.193523	-0.574791	-0.399877	-0.743547	-0.261877
Eif2b4	1.0815	0.616997	1.27062	0.453052	0.647922	0.728076	0.358631	0.344138	-0.70277	0.102326	-0.320361	-0.511686	-0.543419	-0.414889	-0.100978	-0.650727	-0.497561	-0.0287943	-0.0993215	-0.258891	-0.377007
Cmtm8	0.106981	0.699023	1.26677	0.503593	1.14411	0.457512	0.859833	0.265007	0.0930896	0.541649	-0.228219	-0.678369	-0.557504	-0.683332	-0.747277	-0.320687	-0.627885	-0.429202	-0.506488	0.581222	-0.701157
Dpysl2	0.228663	0.723741	1.23054	-0.0591048	0.97321	-0.0976772	-0.834707	-0.7861	0.689725	0.220638	-0.897832	-0.855528	-0.416885	0.942515	0.585862	0.154897	0.0679905	-0.397122	0.0640083	0.331334	0.191951
D11Wsu47e	0.101308	0.318786	1.22743	0.456944	0.82415	0.338896	0.410423	0.523795	0.223036	-0.0414371	-0.130037	-0.277915	-0.157091	-0.342359	-0.335795	-0.16832	-0.371734	-0.343731	-0.128837	-0.0938376	-0.467675
Erich6	0.0152312	-0.187656	1.22461	0.390195	0.976426	-0.0133067	0.0886797	0.473114	-0.118546	-0.12724	-0.271729	-0.194871	-0.285313	-0.134245	-0.0948102	-0.187949	-0.275695	-0.112878	-0.124912	-0.124454	-0.196039
Celf4	-0.352521	1.00515	1.21789	-0.00576869	0.729935	0.194112	0.0497871	0.184451	-0.284558	-0.417866	0.0314282	-0.29385	-0.0136598	-0.147494	0.21079	-0.105217	-0.177388	-0.198156	-0.0547952	-0.360465	-0.401054
Vdac2	0.705242	0.154194	1.2152	0.302456	0.522843	0.196984	0.901906	0.807521	0.738812	0.151677	-0.274966	-0.418598	-0.401191	-1.26638	-1.15665	-0.457402	-0.556906	0.379813	0.070019	-0.752359	-0.560173
Pax8	0.732072	0.515528	1.20187	0.531269	0.909511	0.2971	1.09853	1.04153	0.360929	-0.0411256	-0.509903	-0.288592	-0.329591	-0.886775	-0.88294	-0.522271	-0.735315	-0.880581	-0.808209	-0.750779	-0.68962
Polr2g	0.636225	-0.0558693	1.20087	0.59074	0.420446	0.52771	0.341229	0.765181	-0.206763	0.159595	0.103528	-0.408159	-0.255247	-0.51967	-0.164688	-0.388711	-0.469562	-0.119702	-0.569239	-0.204583	0.143699
Pfn2	1.06051	0.540383	1.19684	0.312626	0.941878	0.273223	0.662567	0.657299	0.358181	-0.298167	-0.48804	-0.639692	-0.724127	-0.912906	-0.0549695	-0.00774325	-0.425301	0.312682	0.680359	-1.04457	-1.18689
Nnt	0.0481323	-0.0836657	1.19583	0.0301659	0.992598	-0.124804	-0.511346	-0.44535	-0.23855	0.292993	-0.194053	-0.385116	-0.462276	0.419604	-0.0445632	-0.161483	-0.0974026	0.651253	1.13104	-0.149202	-0.129677
Cth	0.495103	0.718178	1.19363	0.015231	0.670129	0.8347	0.460494	0.454992	0.0756641	-0.621934	0.298047	-0.140814	-0.110736	-0.106921	-0.483493	-0.778034	-0.573722	-0.443592	-0.275606	-0.475932	-0.606236
Bloc1s2	0.028154	0.128542	1.19117	0.0415252	0.746705	0.0444641	0.516791	0.185925	0.540907	0.771379	-0.178255	0.132765	-0.234768	-0.271012	-0.425946	-0.696081	-0.844484	-0.975268	-0.7518	-0.279779	-0.0483482
Sra1	0.731769	0.636353	1.18928	1.07648	0.814128	0.551701	0.86914	0.679164	-0.0867937	-0.10894	-0.52129	-0.500085	-0.30151	-0.169253	-0.387662	-0.580396	-0.522783	-1.34085	-1.03103	-0.288354	-0.409972
Smc5	0.354691	0.281515	1.18777	0.0128931	1.12868	0.00906506	-0.181232	-0.0189055	-0.0445881	-0.105789	0.144252	-0.100584	-0.35289	-0.165774	0.150208	-0.410815	-0.284719	0.0916271	0.434222	-0.212654	-0.0651497
Hmgb3	1.05678	0.929796	1.18274	0.828853	0.942893	0.387264	0.88487	0.682762	0.148469	-0.391521	-0.813067	-0.405315	-0.57472	-0.668819	-0.771954	-0.685724	-0.473541	-0.807886	-0.847065	-0.21621	-0.746684
Snx17	0.456679	0.501015	1.18256	0.463511	1.11753	0.900496	0.496534	0.49389	-0.212648	-0.204404	-0.458588	-0.637006	-0.613347	-0.289715	-0.400078	-0.126891	-0.210025	-0.090129	0.0138217	-0.176635	-0.353755
Commd3	0.545354	0.52781	1.18079	0.150495	1.1337	0.399376	0.528013	0.648336	0.275651	0.317143	-0.525829	-0.585815	-0.733979	-1.00718	-0.171345	-0.150842	-0.303068	0.14991	0.026265	-0.489496	-0.46516
Pfas	0.0559267	0.0941789	1.17741	0.0210483	1.12052	0.516995	-0.108823	0.0693185	1.05929	0.0815753	0.0397311	-0.331736	-0.0187841	-0.147729	-0.19838	-0.0668006	-0.259892	-0.0345466	0.238189	-0.0737965	-0.315913
Ccdc64	0.809045	0.625962	1.17147	0.344462	1.15834	0.337812	0.121536	0.126826	-0.0997649	-0.139725	-0.513606	-0.364146	-0.378252	-0.121959	-0.129546	-0.284623	-0.41005	-0.116864	0.0253589	-0.247188	-0.236251
Mrpl54	0.369397	0.403266	1.16753	0.967945	0.678103	0.145717	1.14499	0.886252	0.598359	0.536366	-0.670107	-0.713958	-0.730034	-1.203	-1.26356	-0.6893	-0.597267	0.155354	-0.127372	-0.566267	-0.315475
Them4	0.540381	0.454436	1.16599	0.962943	0.954661	0.888481	0.672111	0.916918	-0.754525	-0.31211	-0.20199	-0.382656	-0.366004	-0.495627	-0.41275	-0.530266	-0.626759	-0.709901	-0.218967	-0.673013	-0.633544
Aen	0.130144	0.721366	1.15103	0.41477	0.601546	0.167451	0.171896	-0.0225202	-0.416087	-0.425992	-0.271057	0.0849648	0.195453	0.571487	-0.0625885	-0.262836	-0.473326	-0.649088	-0.35858	-0.323831	-0.797261
Med21	0.0837699	0.204871	1.1401	0.116395	0.906926	0.131655	0.119846	0.240833	0.17359	0.0743226	-0.32479	-0.460775	-0.253717	-0.457845	-0.297775	0.152515	-0.1413	0.565676	0.580185	-0.14374	-0.150863
Gale	0.873591	0.729684	1.13824	0.620382	0.985423	0.71389	0.541381	0.577021	-0.383381	-0.238885	-0.333612	-0.420982	-0.340722	-0.411368	-0.32094	-0.420064	-0.607399	-0.433279	-0.343836	-0.36296	-0.462106
Snapc5	0.303466	-0.298835	1.13595	0.971426	0.373664	0.4796	0.545864	0.48184	0.337037	0.215304	0.0396426	-0.31285	0.0315041	-0.78985	-0.278599	-0.27503	-0.560645	-0.392888	-0.290934	-0.323755	0.155856
Isca2	0.433907	0.63568	1.13562	0.469279	0.564857	0.0506976	0.440498	0.148806	0.218888	0.309037	-0.211479	-0.369608	-0.513125	-0.205906	-0.254114	-0.20909	-0.328393	-0.107038	0.0331902	-0.320119	-0.309653
Mrpl34	0.583946	0.214831	1.13279	0.779828	1.12558	0.463783	1.03909	0.728341	-0.246218	0.545284	-0.696265	-0.843178	-0.660804	-1.09214	-1.04437	-0.20066	-0.56823	0.368837	-0.313037	-0.467313	-0.600276
Mrpl17	0.704437	0.624151	1.13186	1.06911	0.650735	0.658561	0.910204	0.680295	0.771036	-0.440048	-0.349115	-0.408615	-0.222578	-0.61539	-0.681923	-0.434327	-0.783407	-0.144582	-0.501745	-0.253281	-1.10584
Nhp2	0.912206	0.489985	1.12926	0.750989	0.24916	0.59612	0.299507	-0.0920227	-0.0743191	-0.530213	-0.146937	-0.217363	-0.0107728	0.375139	0.243477	-0.752948	-0.592874	-0.48563	-0.892418	-0.104945	-0.0819192
Mapk9	-0.0126653	0.0555386	1.12345	-0.00206719	1.10376	0.152035	-0.004964	0.248307	-0.158971	-0.160112	-0.0595235	-0.317233	-0.280837	0.0118074	-0.0475464	-0.0904613	-0.101239	0.302958	0.331073	-0.114887	0.0460773
Pdrg1	0.939568	0.262208	1.12116	0.164317	0.703299	-0.183575	0.536085	0.791423	0.248967	0.223292	-0.614408	-0.330812	-0.50206	-0.156026	-0.179942	-0.438173	-0.379637	-0.550386	-0.195162	-0.438128	-0.604807
Txndc17	0.313219	-0.129701	1.12018	0.00596991	-0.0562909	-0.0826944	0.74275	0.66303	0.787394	-0.00129078	-0.279104	0.129388	0.052895	-0.303739	-0.42888	-0.649073	-0.597636	-0.897927	-0.727802	-0.235041	-0.297559
Cdk2ap2	0.795532	0.743801	1.11983	0.837026	0.773178	0.725721	0.663852	0.126747	0.439941	-0.420629	-0.458742	-0.555717	-0.52622	-0.691514	0.00912652	-0.364163	-0.14823	-0.908816	-0.479481	-0.894095	-0.138878
Tbrg1	0.920144	0.931741	1.11292	0.582194	0.810731	0.50141	0.573888	0.695477	0.315414	-0.622799	-0.152335	-0.218646	-0.099451	0.317023	-0.0920978	-0.604477	-0.754435	-1.3253	-1.30582	-0.448281	-1.02337
Rangap1	0.5006	0.282337	1.10729	0.44783	0.95089	0.410666	0.585455	0.365994	0.309126	-0.436679	0.412367	0.0173359	0.275919	-0.396707	-0.491801	-0.499462	-0.71636	-0.825777	-0.60299	-0.215594	-0.284645
Lamtor1	0.655402	0.484682	1.1025	0.47354	0.776332	0.203026	0.8298	0.399921	0.562815	0.423866	-0.432717	-0.445976	-0.224402	-0.806216	-0.611432	-0.429019	-0.553803	-0.352609	-0.453625	-0.578904	0.228061
Plekha8	0.154759	0.687647	1.10133	0.353785	1.03389	0.384506	0.0961558	-0.0103944	-0.173427	-0.183402	-0.0411347	-0.303722	-0.361819	-0.0534214	0.0159161	-0.131307	-0.183092	-0.107927	0.177947	-0.0910444	-0.336602
Mrps35	0.124724	-0.128284	1.09595	0.301944	0.783851	-0.0987475	0.21099	0.308128	0.128586	0.22218	0.273139	-0.243918	-0.351341	-0.205745	-0.26474	-0.0522497	-0.226224	0.357861	-0.00755203	-0.419578	-0.204813
Shmt2	0.245217	0.64448	1.0946	0.728053	0.893941	0.739796	0.636917	0.761233	0.952002	-0.109411	-0.0395804	-0.399164	-0.368548	-0.423241	-0.644646	-0.391741	-0.569249	-0.578609	-0.223011	-0.296198	-0.624626
Amdhd1	0.022966	0.460954	1.09336	0.218171	0.0133653	-0.0165568	0.110819	0.180756	-0.0614437	0.0109453	-0.274317	-0.185916	-0.21034	-0.0712078	-0.0780362	-0.0344245	-0.197977	-0.0578429	-0.0656876	-0.0986123	0.0135825
Rpa3	0.494613	0.700055	1.09305	0.628838	0.599375	0.288835	0.771224	0.405721	0.189846	-0.125428	-0.220412	-0.498063	-0.385301	-0.47841	-0.508562	-0.0630062	-0.272461	-0.183614	-0.17667	-0.336586	-0.563869
Ddhd2	0.345282	0.105244	1.08659	0.00275153	0.911837	0.315808	-0.170717	0.0498213	0.281073	0.306929	-0.344305	-0.343536	-0.147377	-0.367425	0.150749	-0.18022	-0.163341	-0.00488701	0.537593	-0.171397	-0.42401
Nrbf2	0.145335	0.0806144	1.08374	0.66815	0.720347	0.524002	0.467825	0.645359	0.90231	-0.0166394	-0.298691	-0.280802	-0.3835	-0.400251	-0.163155	-0.203077	-0.339261	-0.568335	-0.480415	-0.252893	-0.230532
Abhd11	0.510521	0.375491	1.08162	0.485936	1.04284	0.489296	0.755851	0.360765	-0.365015	-0.0242805	0.027283	-0.3941	-0.54269	-0.351172	-0.436149	-0.136538	-0.34692	-0.270132	0.00103352	-0.660338	-0.698176
Epb4.1l5	0.0724148	0.430087	1.08048	0.635312	0.121425	0.271675	0.399477	0.443232	0.324641	0.451049	-0.0931356	-0.147523	-0.142479	-0.20407	-0.402134	-0.0961106	-0.478575	-0.502664	-0.452521	-0.55259	-0.624387
Mrpl18	0.577274	0.116242	1.07887	0.526945	0.651248	0.44723	0.598367	0.457497	0.518932	0.12384	-0.38904	-0.691332	-0.708286	-0.434977	-0.480196	-0.493358	-0.152291	0.450309	-0.211978	-0.35699	-0.101297
Trp53inp1	0.0682296	-0.627346	1.07865	0.430694	0.424678	0.0961402	-0.387811	-0.271661	-0.561009	0.972808	0.620714	-0.072285	0.0862177	-0.296302	-0.201233	-0.0780137	-0.410321	-0.217533	-0.198107	-0.12925	-0.466394
Mrps17	0.453252	0.101795	1.07695	0.539477	0.80872	0.0949863	0.713807	0.593867	0.244741	-0.105231	-0.339747	-0.217077	-0.365531	-0.778918	-0.401242	-0.537115	-0.383494	0.187654	-0.245724	-0.671036	-0.7197
Napg	0.465548	0.219781	1.06777	0.11552	0.96396	-0.0267421	-0.00835671	0.372674	-0.109867	-0.0175972	-0.0713569	-0.300487	-0.218294	-0.232614	-0.220689	-0.0432361	-0.182853	-0.114574	0.395929	0.199638	-0.0229307
Cox4i1	-0.0526555	0.460055	1.0654	0.80985	0.94121	0.412621	0.835702	0.653487	0.234963	-0.307817	-1.3696	-0.462821	-0.494055	-1.8169	-1.29175	-1.20006	-0.230522	0.85484	-0.395148	-0.669483	-0.589015
Timm44	0.295632	0.280649	1.05884	0.217634	0.320574	0.0805486	0.0142297	-0.0741545	0.754435	0.137324	-0.0676627	-0.250177	-0.414899	-0.299043	-0.226122	-0.231247	-0.0865462	0.0910821	0.327623	-0.082631	0.130619
Csrnp2	0.367665	-0.181472	1.05862	-0.0934244	0.775377	0.30042	-0.119211	-0.0172	-0.112153	0.219773	-0.0697075	-0.387489	-0.33734	0.01089	0.059173	-0.114086	-0.0628084	0.0533178	0.0579098	-0.0962732	-0.165814
Tmem159	0.270053	-0.159595	1.04606	0.781309	0.898791	0.56937	0.230445	0.079146	0.244163	-0.41348	-0.242692	-0.540751	-0.488767	0.262704	0.455197	-0.0528181	-0.0305918	0.00188664	0.0293722	-0.515724	-0.942328
Bnip3	0.257236	0.647931	1.03997	-0.0232335	0.41643	-0.33319	-0.236049	0.242841	0.038272	0.638329	-0.480671	-0.532006	-0.284604	-0.677993	-0.485115	-0.246868	0.142234	0.949245	0.490943	-0.932581	-0.544424
Coprs	0.51627	0.292017	1.03162	0.989414	0.0503425	0.30427	-0.075994	-0.0746802	-0.0813008	0.258196	-0.479307	-0.4477	-0.426538	-0.0214558	0.0143897	-0.217326	-0.0759568	0.00130284	0.0893177	-0.248112	-0.181651
Paip2	0.201219	0.409136	1.03098	0.362695	0.306234	0.280613	0.66168	0.337541	0.357874	-0.147852	-0.366559	-0.664425	-0.689227	-0.636538	-0.42654	-0.186736	0.0352689	0.212851	0.229604	-0.262059	-0.950026
Dguok	0.0860199	0.276266	1.0302	0.144933	1.01545	0.33196	0.383624	0.661003	0.0959983	0.0840656	-0.409521	-0.327593	-0.327239	-0.743447	-0.0339129	-0.00846447	-0.276967	-0.129412	0.0357489	-0.247463	-0.00292933
Mrpl12	0.468653	0.0128007	1.02805	0.259015	0.629621	0.125025	0.474421	0.573483	0.0811516	0.336298	-0.44851	-0.208443	-0.0840277	0.09063	-0.329793	-0.492109	-0.587376	-0.22586	-0.392572	-0.0798008	-0.498112
Slirp	0.663476	0.35559	1.02633	0.605494	-0.355806	0.149905	0.912284	0.947206	0.248454	0.323386	-0.927523	-0.535127	-0.766018	-1.0713	-0.978651	-1.03337	-0.588527	1.00652	0.0373857	-0.942875	-0.293307
Satb1	0.217255	-0.436306	1.02372	0.0484733	0.771645	0.340594	0.293027	0.134157	0.525464	0.0405929	0.0285951	0.0883979	-0.13168	-0.673395	-0.410299	-0.59539	-0.630562	0.298899	0.337612	-0.108963	-0.119998
Sec22b	0.754699	0.684919	1.02357	0.556506	0.996325	0.348871	0.463505	0.363887	0.342408	-0.46499	-0.25051	-0.539442	-0.477474	0.278908	-0.0313105	-0.0168452	-0.206793	-0.554527	-0.14826	-0.258703	-0.154333
Dnaja4	0.819232	-0.359268	1.01874	-0.0627573	0.820815	-0.0322745	-0.191579	-0.0482794	-0.456649	-0.401008	-0.301391	-0.178766	-0.257421	0.312558	0.336325	-0.13513	-0.0383585	0.00530704	-0.111868	-0.210457	-0.570423
Gstp1	0.228483	-0.0122581	1.01834	0.772058	0.516281	0.53361	0.223757	0.542546	0.466862	-0.559774	0.272766	-0.0808555	-0.0138482	-0.543235	-0.353795	-0.439059	-0.438083	0.432093	0.406905	-0.753218	-0.963143
Mphosph6	0.603824	0.78428	1.01803	0.168403	0.828612	0.468823	0.374345	0.65709	0.196399	-0.269071	-0.045353	-0.522431	-0.378601	-0.234584	-0.11117	-0.122028	-0.156882	-0.109914	-0.2726	-0.3026	-0.613142
Actr6	0.392407	-0.0364722	1.01608	0.235272	0.429622	0.130158	-0.0459742	0.389293	0.209906	-0.0776782	-0.238997	-0.371662	-0.166647	0.109788	0.08993	-0.429319	0.0210447	0.011558	-0.0782929	-0.170065	-0.10456
Hist1h3d	0.152478	0.917189	1.01538	0.723311	0.0418134	0.246401	-0.0194002	-0.0822906	-0.0955267	-0.210545	-0.224413	-0.245749	-0.347128	-0.121539	-0.0288037	-0.432288	-0.217897	-0.0901838	-0.142766	-0.132822	0.0121328
Snx30	0.306122	0.132478	1.01108	-0.189693	0.940094	-0.109539	-0.021036	0.193576	-0.224483	0.372817	-0.280293	-0.356664	-0.289512	-0.115234	-0.013997	0.0335278	-0.0956354	-0.0975698	0.307758	-0.279464	0.141666
BC004004	0.340788	-0.0722833	1.00997	0.028232	0.887203	0.563309	0.935771	0.441575	0.0175849	0.24573	-0.338314	-0.489469	-0.328237	-0.769689	-0.701623	-0.0190239	-0.41818	-0.0835448	0.183651	-0.384242	-0.630808
Polr2i	0.211139	0.166385	0.999125	0.589552	-0.106754	-0.0590213	0.539202	0.415773	0.012252	0.261832	-0.216502	-0.308622	-0.306003	-0.792051	-0.355055	-0.516837	-0.319921	0.519582	0.0991454	-0.393043	-0.7455
Mrpl27	0.5584	0.488108	0.997663	0.346496	0.739489	0.370887	0.578461	0.769158	-0.567077	0.013349	-0.600174	-0.588881	-0.429979	-0.708533	-0.389163	0.00916991	-0.254563	0.0724281	0.283337	-0.447016	-0.0765605
Thyn1	0.846519	0.585386	0.994088	0.121289	0.401877	0.391872	0.891394	0.859111	0.773236	-0.259435	-0.383206	-0.501853	-0.554636	-0.523417	-0.760341	-0.339895	-0.254635	-0.210149	-0.300753	-0.526012	-0.825589
Baiap2l1	0.292678	0.398589	0.99368	0.329785	0.702173	0.455781	0.883746	0.898136	0.179204	-0.0775104	0.16706	-0.150954	-0.198957	-0.0402793	-0.774229	-0.229765	-0.633762	-0.78979	-0.826941	-0.707945	-0.717119
Sf3b6	-0.187365	0.334543	0.992044	0.383899	0.373281	-0.354543	0.530914	0.634581	-0.481429	-0.142442	-0.211266	0.0583933	-0.268794	-0.192731	-0.395049	-0.125454	-0.338089	-0.315528	-0.656924	-0.176411	-0.0356112
Tmem223	0.78762	0.716481	0.985055	0.318957	0.635959	0.884392	0.533631	0.62513	0.394499	0.281796	-0.270603	-0.689111	-0.503528	-0.442856	-0.40852	-0.153209	-0.493876	0.302457	-0.0511103	-0.594795	-0.45736
Fsd1l	0.385877	0.171301	0.981172	0.553818	0.512816	0.803989	0.50494	0.523304	0.00183355	-0.271998	-0.0577379	-0.183965	-0.206851	-0.558752	-0.292944	-0.267534	-0.434352	-0.414964	0.00839397	-0.437581	-0.446876
Spa17	0.25375	0.326874	0.980392	0.914934	-0.38197	0.209688	0.582822	0.319675	0.110568	-0.0889971	-0.19497	-0.362351	-0.297771	-0.309089	-0.340507	-0.0382699	-0.271208	0.0691778	-0.420196	-0.286317	-0.230145
Cmc2	0.149466	-0.0952235	0.97715	0.203873	0.481174	0.297824	0.708239	0.321695	-0.341214	-0.277026	-0.264532	-0.761934	-0.592195	0.0177376	-0.640867	-0.0570723	0.191399	0.0687618	-0.116195	-0.187898	0.0852992
Zfp560	0.639138	0.633065	0.976674	0.431359	0.0427173	0.205021	0.971487	0.40224	0.368224	0.0473008	0.0396629	-0.595367	-0.515491	-0.546483	-0.380804	-0.421072	-0.236114	-0.25341	-0.502321	-0.389056	-0.684126
Brd8	0.71808	0.384862	0.970355	0.367799	0.560203	0.474791	0.307823	0.205648	-0.0467303	-0.130898	0.240517	-0.442148	-0.276344	-0.231085	-0.176701	-0.0326489	-0.213016	-0.42585	0.180188	-0.178629	-0.108183
Hoxb4	0.475682	0.370573	0.967508	0.448251	0.317079	-0.00319885	0.33143	0.48983	-0.467601	-0.0736739	0.187458	-0.175049	0.0276614	-0.433785	-0.287579	-0.0592533	-0.352802	-0.574609	-0.510062	0.277167	-0.661716
Mrps36	0.578145	0.464342	0.967444	0.905728	0.143192	0.257517	0.841384	0.377181	0.582542	0.392154	-0.404625	-0.707444	-0.583022	-1.05167	-0.493305	-0.437444	-0.392223	0.40489	0.249843	-0.68307	-0.627036
Snap29	0.3881	-0.0533342	0.966493	0.336532	0.614046	0.130356	0.207465	0.487454	-0.44319	0.112221	-0.0817315	-0.364521	-0.210819	-0.0929734	-0.209376	-0.367857	-0.192615	-0.279782	-0.00409591	0.196656	0.0799266
Eif2b2	0.432202	0.878742	0.966303	0.578641	0.587443	0.61067	-0.0271041	0.250877	0.0830458	-0.00878206	0.110694	-0.246322	-0.330965	0.0795571	-0.00307941	-0.138575	-0.497613	-0.281638	-0.192561	0.0978357	-0.00843265
Unc119b	0.491617	0.621282	0.946427	0.0282474	0.919898	0.565786	0.197961	0.273469	-0.134798	0.230774	-0.326974	-0.281461	-0.390662	-0.0310741	-0.158171	-0.281906	-0.336374	-0.265486	-0.239642	-0.254324	0.139508
Polr2f	0.575701	0.166901	0.946378	0.54901	0.378602	0.452664	0.784016	0.521254	-0.0184148	-0.0909799	-0.863613	-0.356911	-0.756988	-0.659563	-0.249575	-0.475331	-0.265453	0.119737	-0.00524381	-0.629823	-1.22147
Gprasp2	-0.164084	0.7077	0.944029	-0.134167	0.830289	-0.201923	-0.231398	-0.211589	-0.199132	-0.250158	-0.249217	-0.344863	-0.298016	-0.0688072	0.623836	0.278784	0.0417468	-0.181505	-0.0391465	-0.255925	-0.281347
Ndufb5	0.115391	-0.266896	0.941366	0.222536	0.373233	0.779178	0.922749	0.876011	0.78314	0.335997	-0.646338	-0.396102	-0.754858	-1.17904	-1.12762	-0.602545	-0.436938	0.462107	-0.145463	-0.714412	-0.651465
Cyhr1	0.595005	0.305079	0.940667	0.385684	0.900785	0.717712	0.590077	0.351965	0.377506	0.212967	-0.397134	-0.523852	-0.776978	-0.515803	-0.27296	-0.225834	-0.25001	-0.162615	0.384349	-0.663043	-0.709858
Mat2b	0.114837	0.243483	0.938106	0.296065	0.526041	0.140548	0.306757	0.601688	0.35915	0.415525	-0.222213	-0.267286	-0.513289	-0.828254	-0.518459	0.0174996	-0.471134	0.594364	0.648119	-0.449471	-0.731615
Fam160a1	0.071799	0.00630319	0.9361	-0.160343	0.703938	0.114174	0.238163	0.054165	0.0186399	0.457596	-0.097739	-0.177109	-0.0598162	-0.107682	-0.19322	-0.284748	-0.302698	-0.183945	-0.0535906	-0.0796655	-0.0204354
Bhlhb9	0.221451	0.121384	0.935755	0.0747073	0.904799	-0.221269	0.136648	0.265227	-0.527944	-0.105879	-0.326253	-0.34069	-0.422959	-0.371106	0.131262	0.179692	0.00677204	0.115423	0.560052	-0.244834	-0.433281
Cdc34	0.397232	-0.179	0.935141	0.702038	0.378953	0.103194	0.782424	0.270496	0.130815	0.0543237	-0.40961	-0.231539	-0.128783	-0.195505	-0.344446	-0.421535	-0.296228	-0.515158	-0.677656	-0.369193	-0.513328
Cdc26	0.328134	0.65578	0.932082	0.654855	0.573796	0.346774	0.719818	0.355349	0.3016	-0.0134977	-0.482929	-0.551427	-0.662729	-0.191626	0.0150575	-0.284354	-0.228669	-0.516497	-0.395886	-0.0574798	-0.402804
Psmb2	-0.602959	-0.00404102	0.930267	0.719986	0.293598	0.106114	0.115517	0.701537	0.652368	-0.230738	-0.11488	-0.0624205	-0.182979	0.0478253	-0.509485	0.154729	-0.233299	0.262419	0.120873	-0.37719	-0.600734
Skiv2l	0.0763124	0.365488	0.916559	0.0980425	0.769258	0.411439	0.0596444	0.110917	-0.215719	0.215382	-0.367992	-0.363116	-0.227686	0.56226	0.00607436	0.00488845	-0.250665	-0.148996	0.315474	-0.203061	-0.136499
Mif4gd	-0.205119	-0.142601	0.91244	0.159182	0.35971	0.320932	0.422867	0.201311	-0.127792	0.5168	-0.112634	-0.127335	-0.148315	-0.512819	-0.361321	-0.493386	-0.388646	-0.348912	0.0609162	-0.373316	0.729993
Phf14	0.248671	0.00727561	0.903072	0.193626	0.342282	-0.0628911	-0.0719474	0.123216	-0.288598	0.132106	-0.0843921	-0.120112	-0.380844	-0.300561	-0.0068262	0.241864	-0.0490846	-0.013441	-0.228946	0.024213	-0.414955
Bet1	0.598466	0.26955	0.894509	0.42281	0.615058	0.221633	0.637935	0.182965	0.60788	-0.0547614	-0.329939	-0.525875	-0.410965	-0.483819	-0.196814	-0.0327743	-0.114388	-0.272364	0.211475	-0.113456	-0.787649
Nmrk1	0.40953	0.47295	0.892813	0.303873	0.345334	0.292098	0.184978	0.0304558	0.034134	0.0737638	-0.015124	-0.342337	-0.281506	-0.134006	-0.124481	-0.0083913	-0.128682	-0.138206	0.0170997	-0.0635915	-0.301438
Supt5	0.581205	0.542273	0.889747	0.521111	0.881014	0.295009	0.317903	-0.0168687	-0.164466	-0.0183935	-0.0543994	-0.316947	-0.323472	-0.287904	-0.0931457	-0.201835	-0.270608	-0.0539853	-0.10555	-0.0746273	-0.316036
Prorsd1	0.360345	0.472177	0.883983	0.432931	0.183976	0.313204	0.470977	0.507533	0.0498235	-0.0457491	-0.47094	-0.413889	-0.602978	-0.517498	-0.434401	-0.000749751	-0.220156	0.30043	0.413632	-0.186737	-0.469144
Sult1c2	0.114762	-0.163586	0.880188	0.563535	0.391089	0.727532	0.00603861	-0.0902915	-0.0848279	-0.20969	-0.00927582	-0.212798	-0.26275	-0.104809	0.00210596	-0.238444	-0.217572	-0.133846	-0.135984	-0.10074	-0.0803958
Phpt1	-0.47861	-0.243785	0.878732	-0.0687627	0.170302	-0.311495	0.162912	0.451297	0.126585	0.337663	-0.585538	-0.154694	-0.365487	-0.43472	0.085851	-0.225504	0.149806	0.575064	0.0995306	-0.940987	-1.17436
C330007P06Rik	0.595898	0.0259177	0.877563	0.760485	0.756906	0.332755	0.256003	0.392346	-0.105745	0.0867768	-0.102459	-0.585896	-0.374159	-0.161196	-0.0268305	0.0419338	-0.134091	0.00888249	0.195287	-0.259895	-0.432663
Mrps7	0.176003	0.112156	0.875493	0.153503	0.547238	0.129416	0.672782	0.558089	0.349199	0.0232406	-0.148632	-0.318211	-0.25347	-0.367263	-0.29151	-0.0953372	-0.254104	-0.248091	-0.333612	-0.327832	-0.239645
Lsm3	-0.0247284	0.199391	0.872732	0.169408	0.702938	-0.380972	0.36161	0.153601	-0.154169	0.39619	-0.437004	-0.203074	-0.311367	-0.176675	-0.151518	-0.0403986	-0.271925	0.0428357	-0.0245926	-0.212173	0.211218
Nup188	0.00773941	0.0773648	0.871498	0.039332	0.512909	0.224615	-0.0369952	0.149819	0.260404	0.0632333	0.0235672	-0.118642	-0.0166527	-0.144044	0.00569519	-0.102008	-0.213811	-0.0894782	0.213795	-0.128079	-0.147862
Pgls	0.710026	0.296876	0.870248	0.412852	0.184494	0.182399	0.51143	0.585259	-0.19349	-0.0397294	-0.638257	-0.311691	-0.136412	-0.84487	-0.102879	-0.24762	-0.387428	-0.196331	-0.413244	-0.113603	0.391786
Psmb4	0.270014	-0.000388463	0.868652	0.620003	0.473443	0.279606	0.0478082	0.726055	0.0689483	-0.331618	-0.355657	-0.048239	-0.165275	0.055753	-0.333989	-0.581228	-0.186388	0.152096	-0.310939	-0.374107	-0.410637
Lsm5	0.124104	0.370784	0.866965	0.430881	0.245507	0.207166	0.400671	0.108409	0.562408	-0.335974	-0.698156	-0.223779	-0.109869	-0.248321	-0.22644	-0.373652	-0.0990616	0.241814	-0.269732	-0.165244	-0.0114372
Hdac11	0.376797	0.044512	0.864947	0.235424	0.478845	0.323704	0.0770523	0.0672693	-0.15909	0.567548	-0.189511	-0.276337	-0.328195	-0.187055	-0.0943897	-0.473065	-0.205585	-0.0835208	0.031642	-0.328302	-0.257337
Snf8	0.51103	0.472485	0.863094	0.366981	0.487905	0.0865712	0.541214	0.427491	0.137043	-0.0290849	-0.140548	-0.351926	-0.295017	-0.547694	-0.561728	-0.352836	-0.252485	0.144067	0.0360354	-0.189997	-0.0180231
Mrps28	0.162651	0.0917811	0.862491	0.533056	0.448763	0.0330232	0.739933	0.634733	-0.0998581	-0.182403	-0.0892269	-0.556398	-0.367593	-0.167501	-0.537031	0.0534212	-0.0659429	0.171682	-0.165275	-0.531568	-0.347992
Mkks	0.410675	0.287601	0.861549	0.335054	0.381692	0.112379	0.276697	-0.133658	0.454738	0.214898	-0.13591	-0.431832	-0.195444	-0.286007	-0.256545	-0.0514936	-0.203871	0.460053	0.196159	-0.212109	0.0569944
Taf10	0.774387	0.101112	0.860051	0.535786	0.549765	0.348781	0.826165	0.395642	-0.32597	0.120542	-0.259044	0.462192	0.395044	-0.929443	-0.456318	-1.13266	-1.67296	-1.61743	-1.45129	-0.347714	0.0441251
Cks2	0.34373	0.00896781	0.859557	0.495578	0.289241	0.1721	0.424535	-0.1452	-0.422761	-0.278393	-0.709644	-0.152571	-0.22461	-0.0616235	-0.145719	-0.50909	-0.133868	-0.735891	-0.442172	0.0481045	0.804009
Car5b	0.447052	0.0500054	0.859346	0.365243	0.348249	0.484546	0.356305	0.424814	0.0709946	0.0937954	-0.237917	-0.111926	-0.229134	-0.331595	-0.183788	-0.178121	-0.330048	-0.401931	-0.239078	-0.327112	-0.388771
Ptrhd1	0.349445	0.147405	0.858021	0.181072	0.632729	0.350229	0.385521	-0.0171379	-0.0317781	0.0806849	-0.323422	-0.31879	-0.192548	-0.507932	-0.21945	-0.24615	-0.107292	0.0987055	0.0334553	-0.261579	-0.0571942
Ndufa8	0.161054	0.132219	0.85673	0.751775	0.409611	0.163815	0.481819	0.723272	0.383733	0.250713	-0.213189	-0.697916	-0.699646	-0.664531	-0.555703	-0.398049	-0.149582	0.625785	0.525088	-0.105371	-1.02084
Ccng1	-0.386901	-0.163853	0.851267	0.608564	0.522456	0.580318	0.541773	0.384061	0.0726216	0.329924	-0.150227	0.157565	-0.0457439	-0.812706	-0.603373	-0.446339	-0.673537	-0.0839497	-0.132653	-0.460123	-0.576577
Triap1	0.439342	0.340914	0.850225	0.370617	0.224565	0.308256	0.429218	0.164648	0.482948	-0.18974	0.0826554	-0.312538	-0.453931	-0.260654	-0.200539	-0.236425	-0.212693	0.117437	0.0667451	-0.135125	-0.0928701
Samd10	0.248655	0.0470785	0.848464	0.14696	0.359963	0.200051	0.310986	0.0821512	-0.186975	0.221814	-0.0282753	-0.165734	-0.123218	-0.197577	-0.207161	-0.216391	-0.226071	-0.171213	-0.195789	-0.0984804	-0.200189
C1qtnf4	0.685611	0.522967	0.847184	0.470501	0.277465	0.537253	0.271744	0.266024	0.0691858	0.333842	-0.487216	-0.424994	-0.30794	-0.559626	-0.097255	-0.134128	-0.378505	0.266496	0.257619	-0.553681	-0.608207
Gm2382	0.0586776	-0.00152505	0.845993	0.192674	0.378678	-0.175255	0.363269	0.188661	-0.246821	0.0611637	0.128851	-0.311696	-0.280916	-0.482739	-0.22561	0.0693751	-0.140874	0.11724	0.0370884	0.00488898	0.668797
E2f5	0.401467	0.260551	0.845795	0.398855	0.253865	-0.0598224	0.388526	0.0463152	-0.299913	0.0152559	0.420839	-0.326103	-0.334625	-0.19123	-0.0709828	-0.529147	-0.0488532	-0.252072	0.239988	-0.254433	-0.367432
Eci2	0.0414956	-0.528286	0.845395	0.033365	0.833284	-0.0575017	-0.17015	0.319717	0.554717	-0.198287	-0.0833166	-0.346607	-0.537453	-0.615063	0.371154	-0.102949	0.222768	0.560404	0.481289	-0.194406	-0.64608
Dennd6a	0.185714	0.0996912	0.845146	0.169569	0.610611	0.218302	0.0124004	-0.0474155	-0.239666	0.0804207	-0.108833	-0.379042	-0.203342	-0.375054	-0.00595872	-0.0280578	0.0196397	0.189276	0.340513	0.149287	-0.317971
Pafah1b3	0.132979	0.646393	0.841335	0.337143	0.764767	0.677036	0.743982	0.658673	0.197314	0.465385	-0.0587037	-0.133898	-0.462689	-0.395047	-0.775608	-0.262966	-0.584207	-0.873458	-0.749898	-0.824985	-0.268085
Hmgcl	0.461213	-0.247767	0.840702	0.0769032	0.277638	0.141567	0.49567	0.352128	-0.10297	-0.172062	0.226931	-0.305724	-0.251723	-0.112094	-0.220745	-0.15028	-0.123785	-0.308104	-0.172549	-0.0923025	0.191021
Rfc5	0.115148	0.10744	0.838713	0.0119606	0.178032	0.277228	0.32951	0.387618	0.678346	-0.0682651	-0.279741	-0.155475	-0.248722	-0.301451	-0.209618	-0.0719244	-0.192603	-0.121664	-0.12437	-0.0500733	-0.0743826
Pin1	0.556253	0.134282	0.833334	0.171282	0.573575	0.0634611	0.30683	0.36107	-0.0447438	-0.07788	-0.505329	-0.326483	-0.266764	-0.0426566	-0.235415	-0.257093	-0.104377	0.217718	0.137812	-0.288053	-0.265235
Sec31b	0.240882	-0.189621	0.830751	0.342723	0.439523	0.287098	0.0169778	0.00118317	-0.0461122	-0.24021	-0.0755144	-0.136767	-0.119234	-0.0609055	-0.033853	-0.242746	-0.185788	-0.0200073	0.102207	0.0103235	-0.138022
Plekhj1	0.401087	0.225014	0.825268	0.118534	0.672711	0.19895	0.746927	0.321432	-0.76859	0.151689	0.180322	-0.0533778	-0.156432	-0.751017	-0.447007	-0.72628	-0.499374	-0.27974	-0.48826	-0.486826	-0.0334681
Hist2h2ac	0.358956	0.791595	0.823807	0.478737	0.471281	0.31549	0.68773	0.451528	0.121097	-0.11774	-0.0408859	-0.294653	-0.292517	-0.403952	-0.443988	-0.145749	-0.356605	-0.387903	-0.353581	-0.267662	-0.186136
Ralgapa1	0.419829	0.148373	0.823034	-0.000714658	0.395343	0.119267	-0.00136544	0.0653516	-0.0906449	0.167832	0.745318	-0.461096	-0.101223	-0.268346	-0.0753645	0.172624	-0.205251	0.356567	0.728767	-0.0487789	-0.380151
Med29	0.702508	0.50941	0.820577	0.681736	0.275791	0.576197	0.347698	0.672487	0.320062	-0.00265691	-0.332255	-0.592325	-0.593491	-0.122441	-0.384259	-0.139317	-0.204208	0.0894275	-0.127434	-0.324217	0.145125
Ccnl2	0.632847	0.435825	0.820467	0.492567	0.489754	0.547993	-0.281139	-0.118614	-0.545193	0.117487	0.59192	-0.381967	-0.452618	-0.1523	0.0886176	0.0642338	-0.326298	-0.230911	0.366048	0.458846	-0.386082
Nudt5	-0.0629328	0.0564432	0.817777	0.418405	0.184665	0.0206047	0.327344	0.0655685	0.252625	-0.0631514	-0.0539166	-0.168581	-0.0861539	-0.17367	-0.198523	0.0953577	-0.137247	-0.0411799	-0.0800692	-0.151609	-0.0501263
Rpa2	0.343363	0.341219	0.815687	0.108393	0.429353	0.0900177	0.154359	0.427217	0.72528	-0.214013	-0.429477	-0.236468	-0.114568	-0.269702	0.0253261	-0.0816739	-0.0571972	-0.187265	-0.0557302	-0.0445579	-0.485423
Dctn3	0.464161	0.469735	0.814893	0.497434	0.719394	0.0771456	0.195102	0.595802	0.476854	0.197356	-0.339656	-0.329796	-0.409047	-0.69025	-0.592842	-0.497337	-0.372678	0.649223	0.413375	-0.136923	-0.12825
Emc8	-0.0158561	0.163603	0.814293	0.00064487	0.609183	0.247578	0.0806496	0.125088	0.0188732	-0.311242	-0.779957	-0.519637	-0.584551	-0.125966	0.102959	0.0591486	0.535835	-0.0624418	0.243097	-0.530614	-0.283648
Prkag1	0.72522	0.0372628	0.812249	0.485157	0.807896	0.393539	0.380412	0.393675	0.62024	-0.0965449	0.0176875	-0.25926	-0.179651	-0.125653	-0.268502	0.191569	-0.315584	-0.602114	-0.222023	-0.172781	-0.5501
Mpped2	-0.0258292	-0.136953	0.812192	-0.134538	0.701722	0.229146	0.450368	0.153136	-0.380018	0.628306	0.242876	-0.0404277	-0.0474025	-0.399898	-0.417827	-0.43451	-0.450925	-0.181527	-0.250702	-0.34413	-0.404446
2610002M06Rik	0.225989	0.361428	0.811166	0.105962	0.21813	0.216536	0.0485609	0.133637	0.289142	0.18768	-0.234118	0.135227	-0.11236	-0.255354	-0.167077	-0.268452	-0.454072	-0.00282306	-0.232346	-0.284376	0.0851011
Ccdc53	0.406366	-0.38601	0.809462	-0.209891	0.306691	0.230272	0.156659	0.15149	0.292527	-0.222378	0.0733319	-0.379153	-0.417122	0.0303257	0.1775	0.249331	0.116904	0.255473	-0.175715	-0.311367	-0.0253165
Stard3	0.0523533	0.677698	0.806224	0.766714	0.686458	0.652132	0.535461	0.389973	0.548974	0.233153	-0.131639	-0.386711	-0.379804	-0.484683	-0.236514	-0.271169	-0.46302	-0.352128	-0.187177	-0.140269	-0.0595545
Rab4b	0.243573	0.321329	0.804652	0.438114	0.584381	0.637628	0.147418	-0.00610596	0.523338	0.147652	-0.0380812	-0.269938	-0.101547	0.0449127	-0.024852	0.193206	-0.321593	-0.27742	-0.22746	-0.227071	-0.0457125
Rangrf	0.0771614	0.0374922	0.804104	0.316862	0.332694	0.502572	0.200234	-0.000484924	-0.472242	-0.109282	-0.0107906	-0.236518	-0.236234	0.0055514	-0.121152	-0.0239685	-0.142347	0.399854	-0.0911374	-0.120275	-0.46894
Gpr180	0.257091	0.261732	0.801593	0.0990672	0.495903	0.19895	-0.0351846	0.0876676	-0.102646	-0.356985	-0.0384298	-0.598711	-0.608193	0.685046	-0.0131307	0.463545	0.315582	-0.0693393	0.0271953	-0.401627	-0.364945
Irf9	-0.151661	0.065813	0.80131	0.26263	0.640906	0.163439	-0.465374	-0.345831	0.0576067	-0.39463	0.0416683	-0.310105	-0.441236	0.146031	0.351187	0.154731	0.261343	-0.55403	-0.440966	0.68713	0.62299
Psmc3ip	0.354958	0.508857	0.798233	0.525417	0.207568	0.271585	0.155217	0.393723	0.100946	-0.0327413	-0.388809	-0.478059	-0.387824	-0.673792	0.0242631	-0.365838	0.0493875	0.513947	0.0389643	-0.30644	-0.66407
2300009A05Rik	0.426237	0.187936	0.79628	0.364208	0.769416	-0.0433275	0.711436	0.255897	0.252746	0.236874	-0.147592	-0.359748	-0.423871	-0.581511	-0.319153	-0.256035	-0.281381	0.148871	-0.222748	-0.371792	-0.446275
Aak1	0.176459	0.0290854	0.792651	-0.38573	0.694345	-0.410603	-0.231859	-0.43814	-0.312565	0.138774	-0.509963	-0.435877	-0.323192	0.0385111	0.513627	0.204519	0.219144	0.018691	0.529833	0.323991	-0.55077
Tnks1bp1	0.514869	-0.102566	0.792254	0.271676	0.691655	0.0154035	-0.254685	-0.0644221	-0.261081	-0.0830312	-0.0751362	-0.167534	-0.0976679	0.117416	0.103044	-0.394638	-0.15301	0.220391	0.426946	0.218262	-0.44283
Rprd1a	0.651811	0.728866	0.790948	0.392192	0.571361	0.0568917	0.105838	0.314586	-0.360696	-0.0565504	-0.339195	-0.358449	-0.280835	-0.0136041	0.0364387	-0.242228	-0.137752	-0.121503	0.125698	-0.175728	-0.318415
Srd5a1	0.249415	-0.263391	0.790752	0.288024	0.457924	0.129306	0.0727004	0.176029	0.526267	0.0991316	0.0620618	-0.109674	-0.0785437	-0.121156	-0.129443	-0.112593	-0.199774	-0.0433805	-0.121449	-0.172525	-0.0624724
Adi1	0.5983	0.691958	0.79065	0.674414	0.501076	-0.0808049	0.21841	0.374704	-0.0465396	0.463584	-0.424965	-0.321529	-0.260677	-0.15226	-0.0435704	-0.479225	-0.3722	-0.181919	-0.302365	-0.343934	-0.242901
2410002F23Rik	0.633658	0.383669	0.789699	0.476521	0.781551	-0.139609	0.267772	0.0688319	0.0394914	-0.0904249	-0.436322	-0.18256	-0.0260615	0.362564	-0.125756	-0.278453	-0.221677	-0.280326	0.216773	-0.503404	-0.790234
Bud31	-0.125901	0.127764	0.786813	0.614477	0.0467951	0.508484	0.425262	0.205044	-0.10512	-0.629355	-0.0504515	-0.246288	-0.669377	0.252445	-0.376062	-0.158082	0.077943	-0.185009	-0.600119	0.0206103	-0.06309
Azi2	0.166706	0.00623577	0.781132	0.174387	0.70424	0.426307	0.0530511	0.181131	-0.823574	-0.114245	-0.365481	-0.164869	-0.00730478	-0.110719	-0.293928	-0.301114	-0.0714581	0.115842	0.149065	-0.0868656	-0.078025
Zfpl1	0.44445	0.600823	0.780985	0.13536	0.29594	0.182413	0.607775	0.52058	0.362705	-0.13706	0.180251	-0.284315	-0.385209	-0.482304	-0.35329	-0.293026	-0.2377	-0.0894308	-0.401222	-0.283932	-0.225963
Nudt14	0.284125	-0.0376	0.779803	0.702783	-0.12687	0.685849	0.465344	0.200094	-0.058838	0.116771	-0.191089	0.10921	0.146537	-0.594975	-0.446101	-0.344231	-0.721708	-0.242338	-0.245507	-0.292281	-0.371763
Lamtor5	0.311406	-0.16594	0.778774	0.270627	0.403406	-0.0587297	0.306677	0.376227	-0.412182	0.563457	-0.603278	-0.48595	-0.496516	-0.508661	-0.271999	-0.227426	-0.109118	0.522539	0.30192	-0.310682	-0.0800849
Osbpl1a	-0.380548	0.0652771	0.7784	0.25087	0.541381	-0.00942362	0.501496	0.569789	0.408299	0.00451909	-0.460517	-0.218321	-0.332397	-0.340536	0.0324661	-0.367504	0.0824627	-0.327239	-0.261611	-0.753108	-0.428554
Thoc3	-0.163828	0.267661	0.773046	0.176553	0.431808	-0.0463298	0.192822	0.414893	-0.135346	-0.0507125	-0.0237481	-0.120355	-0.396061	0.190098	-0.278821	-0.244042	-0.183289	-0.0163973	0.0863148	0.199665	-0.134512
Polr3b	0.28268	0.0473937	0.771181	0.347315	0.710621	0.0116319	0.270237	0.0396625	-0.271363	0.12086	-0.12879	-0.125773	-0.25245	-0.284239	-0.221855	-0.212275	-0.144411	-0.124841	-0.0363932	-0.160376	-0.184041
Sh3gl3	-0.144934	0.630223	0.768762	0.166762	0.332446	0.158343	-0.185276	-0.0387236	0.274038	-0.126968	-0.161614	-0.237573	-0.14196	0.176458	0.0819655	-0.281207	-0.117233	-0.00983464	0.280554	0.025775	-0.110678
St13	0.532222	0.304328	0.766015	0.280199	0.360589	-0.183034	0.275683	0.663376	0.373663	0.123142	0.168751	-0.196679	-0.140065	-0.31087	-0.265039	-0.317121	-0.171035	-0.752955	-0.348542	-0.272879	0.127007
Ntan1	0.515141	0.359079	0.765591	0.26007	0.686538	0.551602	-0.0294295	-0.113501	-0.153833	-0.258886	-0.152856	-0.35307	-0.216652	-0.051137	0.221653	0.462302	-0.0786216	-0.0878939	-0.188677	-0.125316	-0.271693
Zfp706	0.00233231	0.132975	0.759286	0.286373	0.555083	-0.0537717	0.744102	0.358531	-0.269855	0.547256	-0.49382	-0.303998	-0.361474	-0.512349	0.107385	-0.442447	-0.359193	-0.566129	-0.2956	-0.243313	-0.619579
2700062C07Rik	0.48367	0.323312	0.757036	0.263922	0.697295	0.347275	0.297104	0.544212	-0.151517	-0.147254	-0.321937	-0.207791	-0.0536118	0.0373706	-0.348547	-0.247571	-0.238039	-0.283899	-0.259585	-0.447077	0.201835
Aarsd1	0.169569	0.321878	0.755636	0.398111	0.145843	0.441881	0.0960357	0.476204	0.409282	0.131893	-0.680572	-0.297122	-0.360755	-0.113008	0.177275	0.0430363	-0.142279	0.0123358	-0.0865512	-0.171025	-0.63455
Gabarapl2	0.588446	-0.1513	0.754862	0.16317	0.582152	-0.477106	0.683276	0.718164	0.287366	0.0782001	-0.128333	-0.0929709	-0.0277286	-0.288693	-0.390764	-0.180321	-0.348463	-0.926095	-0.634905	-0.131443	-0.48757
Jtb	0.630685	0.237049	0.75283	0.167495	0.419533	0.355873	0.557637	0.208537	0.151679	0.20449	-0.191717	-0.651913	-0.636671	-0.348366	0.0603257	0.133313	-0.00109903	-0.249058	-0.260968	-0.379735	0.0494717
C330006A16Rik	0.383047	0.263707	0.748162	0.383627	-0.0201668	0.286184	0.072506	-0.17065	0.103154	-0.102639	-0.306766	-0.377015	-0.00701711	-0.323234	-0.19307	-0.0344327	-0.101884	0.421301	0.746472	-0.0951767	-0.120946
Zfp7	0.0830489	0.258168	0.746764	0.362506	0.722625	0.233162	0.213121	0.210132	-0.200371	0.0390678	-0.168804	-0.10693	-0.0873382	-0.137989	-0.105375	-0.108095	-0.282412	-0.191082	-0.151044	-0.184115	-0.246654
Ypel3	0.364899	-0.0875048	0.746637	0.466281	0.108777	0.157427	0.282217	0.257682	-0.112657	0.580748	-0.00206413	-0.394572	-0.442966	-0.553318	0.459862	-0.281561	-0.256764	-0.300381	0.235333	-0.37106	-0.638556
Tmem230	0.457319	0.2685	0.74559	0.430208	0.511869	0.182733	0.600737	0.605148	0.376867	0.223299	-0.195783	-0.202029	-0.338546	-0.234369	-0.343523	-0.275935	-0.427711	-0.647281	-0.618161	-0.149034	-0.178167
Ccdc77	0.342442	-0.0401688	0.744487	0.463365	0.150211	0.328216	0.10098	0.352947	0.411454	-0.199751	0.0275736	-0.257103	-0.281198	-0.156172	0.017312	-0.0378474	-0.0366341	-0.299655	-0.144698	-0.207441	-0.111161
Cacybp	-0.059412	-0.416669	0.740613	-0.204775	0.16232	-0.132012	-0.0383225	0.272682	0.651999	-0.116683	-0.667861	-0.137613	-0.17338	0.0243591	0.0935546	-0.227663	0.296297	-0.0786999	-0.031391	-0.219761	-0.444006
Xab2	0.454752	0.477759	0.73887	0.273177	0.612227	0.120741	0.0976521	0.0927277	-0.129749	0.00273788	0.077537	-0.159932	-0.118613	0.107782	-0.130797	0.0386023	-0.295858	-0.209405	-0.146353	0.0747637	-0.0448079
Copg2	0.119	0.276967	0.734902	-0.127772	0.340106	0.167986	0.441696	0.490456	0.251331	0.267226	-0.147735	-0.179826	-0.250464	-0.440733	-0.379072	-0.286662	-0.306395	-0.0584149	0.284686	-0.300672	-0.097665
Snx1	0.718603	-0.389693	0.734342	0.405396	0.619474	0.382851	0.171794	0.0833235	0.262674	0.422582	-0.469259	-0.532979	-0.551231	-0.217678	-0.215931	-0.115627	-0.0277636	0.148341	0.427907	-0.303736	-0.359331
Dcun1d5	0.322325	0.067292	0.725004	-0.0378804	0.503187	-0.11443	0.0815373	-0.210902	0.0600698	-0.435213	0.119037	-0.226467	-0.134394	0.276099	0.0411972	0.201237	-0.0536171	0.2403	0.235945	-0.0309515	0.21601
Ubxn2b	-0.0444064	-0.197623	0.722448	0.0655851	0.129385	0.412122	0.0882139	0.0705618	0.530473	-0.0834714	0.12252	-0.204864	-0.259421	-0.0702117	0.0292877	0.0253736	0.0262904	-0.0786985	0.207237	-0.169227	-0.16668
Chmp1b	0.311092	-0.0476276	0.721026	0.33201	0.512421	-0.291147	0.413981	0.283493	0.0607782	0.0775634	0.290685	-0.00378021	-0.0874132	0.104697	-0.244017	0.0846737	-0.448503	-0.512307	-0.480837	-0.00394332	-0.222142
Ddx54	0.530526	0.342503	0.718922	0.118799	0.0151083	0.195366	0.191261	0.259011	0.438768	0.274997	-0.220978	-0.194393	-0.161934	-0.0797373	-0.325965	-0.387616	-0.347305	-0.377506	-0.128127	0.34683	0.0510779
Uso1	0.666067	0.368797	0.718377	0.0592388	0.682558	0.12541	0.0700757	-0.113698	-0.18379	-0.276606	-0.000460039	-0.178108	-0.0799587	0.130127	-0.040158	-0.420132	-0.019929	0.0797649	0.217121	-0.40139	-0.600002
Rbfa	0.273815	0.285518	0.716985	-0.258809	0.216426	0.355193	0.128365	0.0917264	0.338781	-0.0264939	0.0984812	-0.174185	-0.189727	-0.185985	-0.0295614	0.0468513	-0.160003	0.131197	0.213771	-0.348952	0.192282
Tfg	0.0921253	0.485232	0.716887	0.503643	0.583766	0.248583	0.291818	0.405932	0.521171	-0.362018	-0.577427	-0.174952	-0.187235	-0.148298	-0.110162	0.0732938	0.0148042	-0.440117	-0.141704	-0.401136	-0.699557
Gipc2	-0.0176315	-0.253276	0.703558	0.213067	0.630684	0.0457533	-0.0904264	-0.0076122	-0.0737597	0.096218	0.0482607	0.116286	-0.0497463	-0.0900363	-0.0766491	-0.330303	-0.196305	-0.106935	-0.0206422	-0.15294	-0.0979119
Banp	0.184954	0.167928	0.697702	0.261015	0.59712	0.564464	-0.0897338	-0.0241247	0.0766355	-0.088302	-0.0221887	-0.0643482	-0.174588	-0.218462	0.20247	-0.359153	-0.176755	-0.27697	0.0954705	-0.0573642	-0.29692
Hnrnpa2b1	0.558052	-0.0112663	0.691116	0.0906163	0.575003	0.157069	0.116917	0.316064	0.493204	-0.215844	0.232352	-0.481897	-0.427388	-0.342714	-0.561093	0.27817	0.284705	-0.600335	0.111526	-0.113093	0.0993783
Akt1s1	0.179586	0.535214	0.691063	0.550503	0.403631	0.0578539	0.680449	0.630631	0.58858	0.221735	-0.690362	-0.49785	-0.299144	-0.937788	-0.483751	0.063079	-0.15141	-0.224895	0.447755	-0.466592	-0.645408
Zfp120	-0.0241295	0.635948	0.688455	0.1911	0.572755	0.143147	0.173827	0.32488	0.161583	-0.0638024	-0.134234	-0.115169	-0.110775	-0.190375	-0.287406	-0.114969	-0.180188	-0.0407193	-0.155221	-0.161051	0.147372
Apip	-0.0151593	0.121181	0.684696	-0.0791626	0.00414951	0.227199	0.287469	0.281054	-0.00079727	0.308081	-0.114202	-0.272165	-0.286287	-0.172808	-0.128675	-0.10811	-0.0650144	0.146023	-0.0420617	-0.24209	-0.368764
Pagr1a	0.303545	-0.200965	0.68346	0.350411	0.314701	-0.190854	0.0967719	0.189212	-0.569305	-0.0960944	-0.253919	-0.240384	-0.256551	-0.316579	0.0698692	-0.0150224	0.0594399	0.0914472	0.240721	0.0295505	-0.265664
Tssc4	0.662536	0.157577	0.683131	-0.210516	0.0286149	0.115048	-0.0271055	0.253762	0.46508	-0.0422856	-0.432978	-0.21033	-0.101173	-0.220261	0.0917793	0.137672	-0.131672	-0.0586963	0.117672	0.173415	-0.196785
Mta3	0.490771	0.105237	0.682507	-0.0314321	0.5314	0.139369	0.366418	0.383632	0.233894	0.0986617	-0.359006	-0.29995	-0.165734	-0.653939	-0.267957	-0.435046	-0.179701	0.368364	0.283205	-0.368274	-0.15854
Cep83	0.177288	-0.264951	0.681901	-0.220305	0.0486247	-0.271159	-0.0745783	-0.323864	-0.469396	-0.399164	0.138816	0.105096	0.150539	0.282507	0.168199	-0.174018	0.0588706	-0.359245	-0.244083	-0.0135353	-0.0467098
Bax	0.451564	0.0369415	0.678861	0.643743	0.489874	0.163135	0.396463	0.400366	0.257205	0.041554	-0.251028	-0.127245	-0.0886213	-0.770637	-0.192914	-0.377431	-0.541438	-0.107522	-0.365929	0.161201	0.512431
Atg14	0.15436	0.0762728	0.677738	0.0260772	-0.438834	0.119776	0.0245817	-0.0177884	-0.413627	0.0198697	-0.178585	0.0938748	-0.0976696	-0.0108217	-0.159005	-0.0369211	-0.179925	-0.0424641	-0.0150307	-0.193782	0.149322
Pxmp2	0.55457	0.441143	0.674014	-0.0391848	0.372315	0.100296	0.615738	0.341207	0.0365722	-0.209622	-0.325044	-0.328971	-0.325646	-0.229155	-0.377347	-0.0707634	-0.0743634	-0.0602714	-0.167494	-0.349452	-0.23396
Rrp1	0.578664	0.640306	0.673962	0.649791	0.611237	0.412007	0.00719403	0.288906	0.322331	0.0390423	-0.311543	-0.466157	-0.437112	-0.304206	-0.235865	-0.117072	-0.0614464	0.0885507	0.314268	-0.138069	-0.184349
Rnf123	-0.0237487	0.0802528	0.671987	-0.0841368	0.469093	0.0123371	0.17889	-0.02709	0.115239	-0.0497134	-0.210293	-0.234369	-0.206164	-0.172744	-0.0892815	-0.206897	0.0909826	0.20901	0.228201	-0.124367	-0.20638
Hexdc	0.00100721	0.0382235	0.671911	0.0658726	0.452246	0.567665	0.0575553	0.123838	0.3643	0.0792927	-0.0923577	-0.160211	-0.183776	-0.0296359	-0.142624	0.0478332	-0.109622	0.00398676	0.0832975	-0.172119	-0.231102
Eif3g	0.344427	0.11996	0.671603	0.491145	0.58055	0.2124	0.298146	0.447244	0.358008	-0.405888	0.0375055	0.0964536	0.0271925	-0.182349	-0.281185	-0.5567	-0.443648	-0.142867	-0.179206	-0.0823088	-0.636645
Eif3i	0.514447	-0.532528	0.670764	0.367617	-0.0192129	0.244953	0.519407	0.509942	0.553175	-0.296786	-0.459163	-0.0310373	-0.174433	-0.178458	-0.130411	-0.442237	-0.275855	-0.227165	-0.626158	-0.283775	-0.141361
Hibadh	0.487084	0.382464	0.668534	-0.290392	0.562776	-0.0173503	0.0157214	0.24775	0.0768852	-0.102409	-0.551788	-0.624315	-0.580862	-0.1901	0.142769	0.3309	0.2065	0.64066	0.583495	-0.262038	-0.581704
Imp3	0.590071	0.484038	0.666101	0.561281	0.595475	0.512482	-0.119807	0.0348064	-0.523696	-0.266919	-0.728875	-0.381854	-0.307202	0.218789	0.241204	-0.0615402	-0.0336543	0.0232148	-0.00612579	0.188982	-0.683076
Zbed3	0.256774	0.0350779	0.665277	-0.00155399	0.354524	0.0850597	0.0365344	0.10717	-0.187283	0.251472	-0.444376	-0.302594	-0.0902911	0.0716134	-0.0670703	0.0609323	0.00788142	0.0596532	0.0393127	-0.0751358	-0.240017
Med22	0.566195	0.526856	0.664216	0.197914	0.351294	0.248376	0.343896	0.203083	-0.041351	0.435458	-0.282733	-0.295666	-0.302742	-0.198859	-0.242498	-0.249444	-0.291815	-0.0153064	-0.0997502	-0.382084	-0.292905
Arhgap40	-0.00671968	-0.0944429	0.662016	0.508294	0.561537	0.274712	0.276829	0.275484	0.516238	-0.153464	-0.00138298	-0.147094	-0.152154	-0.163981	-0.139032	-0.0585296	-0.145686	-0.184092	-0.177086	-0.135324	-0.167714
Tmem254a	0.295054	0.2069	0.659803	0.30108	0.335323	0.466928	0.349088	-0.00683646	-0.0535431	-0.0378799	-0.150249	-0.182735	-0.20317	-0.264205	-0.103905	-0.172114	-0.123545	-0.145845	-0.189665	-0.194439	-0.257004
Sult1a1	-0.231631	-0.218144	0.656539	0.441165	0.312678	0.0697237	-0.090119	-0.00923003	0.140953	-0.00872103	-0.191603	-0.345135	-0.268867	0.0595628	0.0484228	0.30155	0.188154	-0.146048	-0.156657	0.0848589	0.250403
Mvb12b	0.0945295	0.262123	0.655077	-0.0141133	0.578218	0.0916599	-0.151564	-0.127	-0.180178	-0.100508	-0.236039	-0.300448	-0.255248	-0.125334	0.17286	0.00580283	0.0945298	0.210971	0.260926	0.102415	-0.0945994
Mrps11	0.367639	0.0311419	0.653641	0.0440536	0.461637	0.376708	0.421132	0.166181	-0.215478	0.117561	-0.283712	-0.437666	-0.395682	-0.514763	-0.128695	0.392724	-0.0183721	0.120089	0.118297	-0.251945	-0.474704
Sssca1	0.625523	0.20489	0.652624	0.39859	0.361119	0.2202	0.431898	0.597668	0.0355785	0.0551011	0.089009	-0.219659	-0.167338	-0.431778	-0.388981	-0.427977	-0.329053	0.226296	-0.205931	-0.419038	-0.852386
Snx15	0.407666	0.151697	0.650861	0.227613	0.316023	0.108493	0.234939	0.522278	-0.00725178	0.0222177	-0.310898	-0.185721	-0.163261	-0.332092	0.0882497	-0.304951	-0.177814	-0.393331	-0.00186806	-0.081566	-0.123055
Ocel1	0.512948	-0.0386611	0.650469	0.383506	0.230764	0.409052	0.530182	0.0302111	-0.436824	-0.0278497	-0.152742	-0.199893	-0.191	-0.432175	-0.187132	-0.074618	-0.231871	-0.381925	-0.270687	-0.0766348	0.0408289
Cep78	0.228532	0.0505276	0.64946	0.255141	0.602029	0.330714	0.164349	0.552221	0.489065	-0.0987957	-0.170884	-0.196703	-0.144247	-0.132354	-0.224194	-0.266965	-0.156358	-0.226063	-0.126881	-0.0429815	-0.0926273
Cdk5rap2	0.255204	0.0517548	0.647696	0.223914	0.166373	-0.0538713	0.1221	0.297919	-0.277749	-0.117394	-0.104504	-0.114116	-0.147556	-0.165856	-0.230434	-0.193402	-0.0770188	-0.122244	0.343414	-0.0399584	0.0597249
Rars	0.478247	0.255603	0.647688	-0.100667	0.121661	-0.0550818	-0.10355	0.282085	-0.204749	-0.185938	-0.167235	-0.0402516	-0.112935	0.240266	-0.365137	-0.310729	-0.055355	-0.0313757	0.308882	-0.0290113	0.001479
Fam133b	0.0668214	-0.290005	0.646548	0.0345345	0.575124	0.192154	-0.244003	0.038505	-0.322572	-0.515624	0.180768	-0.25888	-0.182787	0.221004	-0.16121	0.498507	0.213155	0.218273	0.447734	-0.245831	0.0720528
Ufm1	0.253109	0.486538	0.645268	0.0527196	-0.0671843	0.123895	0.45818	0.369706	0.287393	-0.266972	0.0221472	0.228645	0.271806	-0.437683	-0.37117	-0.541448	-0.498475	-0.378365	-0.544318	-0.382929	-0.273111
Chmp3	0.380764	0.347296	0.644763	0.443756	0.64029	-0.017122	0.243394	0.535254	0.166192	0.283097	-0.674796	-0.581707	-0.361509	-0.68953	-0.156583	-0.221379	-0.0580679	0.505036	0.292496	-0.118749	-0.431602
Mum1	0.55373	0.380971	0.644269	0.0453877	0.573991	0.261792	0.0045527	0.0638777	-0.238049	-0.200143	-0.161547	-0.249216	-0.191532	-0.192013	0.165374	-0.154171	-0.0668867	-0.12213	-0.0936522	0.108989	-0.00236262
Ppil4	0.206419	0.0413374	0.642271	0.306243	0.615954	0.147489	-0.296649	0.0602467	0.446564	-0.293302	-0.182776	-0.182153	-0.260861	0.159172	-0.0298918	0.42525	0.126041	-0.174147	0.313781	0.135535	-0.349242
Ppcdc	0.42153	0.536116	0.640548	0.0337394	0.566775	0.366416	0.359671	0.444145	0.285457	0.244783	0.124652	-0.252662	-0.30969	-0.238799	-0.389701	-0.183272	-0.379969	-0.0642872	-0.0944477	-0.216014	0.0906328
Zbtb24	0.111616	0.0201177	0.627508	0.238771	0.389199	-0.180714	-0.030025	0.223316	0.233156	-0.0741311	0.154074	-0.146172	0.031617	0.159909	0.0860743	0.0415915	-0.103664	-0.116128	-0.0948361	0.0782869	-0.273855
Tsen15	0.104056	0.198545	0.627423	0.233791	0.51893	-0.0832328	-0.00673162	0.266747	0.412083	-0.0662139	-0.0373555	-0.061808	-0.262879	-0.0908997	-0.110694	0.0897875	-0.123136	0.113517	-0.06061	0.0550005	-0.154513
Cript	-0.0464001	-0.118945	0.625578	0.0102645	0.0737541	-0.0929292	0.466497	0.176079	0.145223	0.324446	-0.253034	-0.201416	-0.081052	-0.70169	-0.360831	-0.497211	-0.110926	0.210956	-0.0868962	-0.0454167	-0.142623
Hyls1	0.410705	0.293841	0.624261	-0.0178401	0.491575	0.401802	-0.00634338	0.0710484	-0.0489899	-0.259255	-0.179746	-0.0878957	-0.151636	0.0751019	-0.0120144	-0.239467	-0.186898	-0.0852496	-0.0858089	-0.149042	-0.135366
1700094D03Rik	-0.096426	-0.0596515	0.623469	0.314472	0.279376	-0.0584658	-0.0299025	0.00408937	-0.168633	-0.105294	0.0750459	-0.173548	-0.186397	0.086591	0.0164946	0.46599	0.00520633	0.112242	-0.115325	-0.083762	-0.116562
Mxd4	0.0299071	-0.0051709	0.622212	0.0098524	0.331069	0.123261	-0.152364	-0.0450542	-0.178877	0.232204	-0.249648	0.00145438	-0.18347	-0.175316	0.297339	0.398107	-0.152295	-0.53999	-0.211486	0.395841	-0.885132
Odf2	0.407594	0.10576	0.621693	-0.159061	0.442115	-0.0719806	0.0653156	0.0476814	-0.478958	0.128486	0.348165	-0.128877	-0.0436284	-0.282057	-0.0473763	-0.459154	-0.171047	0.0668228	0.617758	-0.146759	-0.505479
Smarcb1	0.0398221	-0.267466	0.617944	-0.0537962	0.0514407	0.141047	0.208562	0.544655	-0.0696205	0.173781	-0.444815	-0.170387	-0.0152236	-0.244454	-0.354234	0.0544873	-0.0111922	-0.223661	0.0378802	-0.0639365	-0.349109
Acbd3	0.530503	0.447679	0.617836	0.285674	0.370387	0.371529	-0.0928178	0.312365	-0.283372	-0.350078	0.239948	0.00951573	-0.208116	0.183336	-0.00695808	-0.128176	-0.263607	-0.585537	-0.286478	-0.0775336	0.336719
Hars2	0.272593	0.157539	0.616141	0.0978348	0.20636	0.385981	0.129713	0.221737	0.528672	0.136189	-0.315998	-0.218043	-0.126322	-0.279847	-0.0948253	-0.296947	-0.147761	-0.153462	0.165125	0.0261455	-0.0976524
Kmt2b	0.411974	0.206792	0.612777	0.194503	0.511295	0.47622	0.0622728	0.100726	-0.0941052	0.127914	0.118932	-0.215323	-0.166284	-0.0800539	-0.0513734	-0.197097	-0.252735	-0.182453	0.0537583	0.0585232	0.11318
Ehmt1	0.273378	0.391803	0.609508	0.151395	0.566011	-0.055451	0.139208	0.18601	0.206909	0.132854	-0.00637059	-0.225097	-0.0290435	-0.323047	-0.166852	-0.130079	-0.15219	-0.103353	0.451655	0.0318969	-0.577329
Haghl	0.393686	0.245954	0.609013	0.282256	0.399927	0.122066	0.330036	0.416476	0.346554	0.207188	-0.245974	-0.296067	-0.221127	-0.388203	-0.310788	-0.170487	-0.131577	0.116023	0.00995759	-0.3801	-0.327952
Ccnt2	-0.00690668	0.0131347	0.607034	-0.177104	0.0843347	0.294384	0.140146	0.11052	0.0456865	0.0752792	0.409346	-0.121739	-0.0472664	0.0202597	-0.167119	-0.119903	-0.158999	-0.251611	0.283778	0.00852174	-0.0186117
Hsp90aa1	-0.861955	-0.665839	0.605957	0.105755	0.185861	-0.239885	-1.2347	-0.437589	-0.806993	0.219923	0.0443848	0.146723	-0.219431	0.528337	0.0116178	0.301412	0.376552	-0.498637	-0.116921	0.189372	0.560254
Tmem254b	0.276064	0.158062	0.601566	0.330481	0.353052	0.435109	0.325438	-0.0396134	-0.019941	-0.034108	-0.128237	-0.167399	-0.183825	-0.251761	-0.090608	-0.15322	-0.110952	-0.135642	-0.177728	-0.174303	-0.241177
Hbp1	0.395955	0.138592	0.597596	0.18965	0.395802	0.202752	-0.379746	0.0219061	-0.265729	0.221665	0.545157	-0.154106	-0.127731	-0.00385085	0.354463	0.0365327	-0.133177	-0.19361	0.298514	-0.0939978	-0.68595
Tmem170b	0.315586	-0.128057	0.597312	0.204785	0.416418	0.478745	0.142368	-0.2903	-0.517654	0.12148	-0.0700667	-0.22901	-0.247364	-0.218252	-0.000923272	0.127021	-0.115024	-0.00739202	0.470865	-0.195348	-0.186275
Med31	0.15397	0.287219	0.595117	0.309031	0.116682	0.126855	-0.113954	0.594379	0.260879	-0.288863	0.310193	-0.079985	-0.133279	0.0248594	-0.203292	0.0190668	-0.0303173	-0.135272	-0.293999	0.0820886	-0.671339
Krcc1	-0.0872949	-0.194558	0.59458	0.0211543	-0.285433	-0.278698	0.317314	0.247044	0.135068	0.242039	-0.346541	-0.341392	0.0274889	-0.288995	-0.17033	0.20012	0.116467	0.0943436	-0.429229	-0.227233	0.404028
Chrna2	0	0.0562022	0.593076	0.0887746	0.156763	0.0331885	0.382552	0.435256	-0.189392	-0.0159796	-0.100792	-0.118631	-0.110831	-0.195279	-0.207184	-0.0184028	-0.133098	-0.174091	-0.174748	-0.110476	-0.154462
Tex261	0.266367	0.203407	0.592808	-0.202304	0.187167	0.308801	0.196447	0.391984	0.371213	0.0797001	0.138288	-0.194888	-0.271536	-0.0458996	0.102832	-0.0524297	-0.176511	-0.5138	0.131057	-0.154368	-0.0126389
Dcaf13	0.14685	0.114753	0.591789	0.212961	0.383067	-0.0387292	-0.230781	0.143496	-0.112821	0.0781433	-0.00695717	0.0414706	-0.169189	0.113303	0.0566183	-0.275648	-0.157042	-0.106328	-0.0837279	0.0180086	0.232164
Tstd2	0.455429	0.30244	0.59136	-0.142058	0.0423113	-0.0536412	0.312771	0.265693	0.454808	0.314725	0.0908634	-0.162988	-0.00517642	-0.122822	-0.145921	-0.352253	-0.222245	-0.188958	-0.261076	-0.377317	-0.245936
Sh3bp5l	-0.10594	0.295926	0.589777	-0.0604283	0.0416819	0.170051	0.0859643	-0.0151854	-0.0399729	0.216677	-0.0832716	0.0839043	0.145691	-0.238271	0.0182108	-0.129405	-0.318902	-0.0914712	0.0947983	-0.25557	-0.389272
Zwint	0.519117	-0.168764	0.589633	-0.0439926	0.272031	0.0418589	0.41458	0.297231	0.230774	0.0566177	0.254374	-0.360472	-0.294202	0.418632	-0.36684	-0.0666301	0.101002	-0.456034	-0.242538	-0.463224	-0.508578
Cdk9	0.446583	0.236091	0.589571	-0.122146	0.0296418	0.25323	-0.117159	0.0123785	0.270909	0.0233734	-0.137971	-0.241512	-0.00201527	0.187387	0.125422	-0.290032	-0.136718	-0.15938	-0.389206	0.550097	0.192627
Dera	0.0716398	0.209016	0.588818	0.210129	0.320854	0.432541	0.414564	0.288712	0.052821	0.0327689	-0.0763372	-0.164565	-0.176724	-0.149233	-0.23789	-0.156679	-0.261274	-0.0750776	-0.21988	-0.100799	-0.152152
Ahsa1	-0.197577	-0.096797	0.58755	-0.0604497	0.376906	0.288331	-0.349559	-0.00224532	-0.0986402	-0.285859	0.0531265	-0.113564	-0.20626	0.39572	0.209259	0.0553944	0.0572164	0.342305	0.515334	-0.17144	0.152165
Ccdc28a	0.25942	0.305588	0.583138	0.0057516	-0.00682947	0.274686	0.168399	0.396676	0.23494	0.0243649	0.121953	-0.205138	-0.152787	-0.0411993	-0.0593696	-0.21092	-0.128506	-0.181423	0.0696049	-0.206298	-0.135032
Malsu1	0.150016	0.576463	0.58077	0.0967864	0.517082	0.390022	0.294499	0.328188	-0.175367	0.0133642	-0.558086	-0.349915	-0.261019	0.187537	0.0392167	0.446483	-0.14354	-0.361093	-0.357027	0.104752	-0.702573
Pfdn6	0.4394	0.515995	0.580604	0.485606	0.0682572	0.20026	0.571579	0.187575	-0.106585	-0.0226207	-0.0831874	-0.212601	-0.396705	-0.518482	-0.632666	-0.257387	-0.350358	0.475858	0.337522	-0.291356	-1.12682
Rai2	0.139485	-0.0582346	0.579632	-0.0683119	0.232746	-0.117058	-0.224195	-0.214609	0.178763	-0.109815	-0.103936	-0.139047	-0.168611	0.121605	-0.0363435	-0.201704	0.128501	0.303895	0.558051	-0.17912	-0.193767
Dhx9	0.190675	0.0944077	0.577505	0.102588	0.254882	-0.0495181	0.0882369	-0.215587	-0.322238	0.33496	-0.114162	-0.204633	-0.253833	0.0177784	-0.0990729	-0.108459	-0.0402397	-0.121498	0.252984	0.126609	-0.387226
Tsfm	0.272306	-0.0961302	0.576726	-0.0274971	0.178038	-0.0508556	-0.0346493	0.266087	-0.278345	0.0980551	-0.123959	-0.134885	-0.225755	-0.0468143	0.0157061	0.0169787	0.000482851	-0.023734	0.360906	-0.231863	-0.180049
Zfp945	0.259877	0.0895422	0.575846	0.0285217	0.139478	0.0186142	0.130052	0.121823	0.29837	0.0826424	0.478267	-0.245953	-0.324413	0.0216695	0.0678784	-0.0937347	-0.0317615	-0.294198	0.0386694	0.0104245	-0.232984
Tmem254c	0.276592	0.171205	0.575838	0.327853	0.367931	0.439998	0.310334	-0.0319986	-0.0214509	-0.0474675	-0.223516	-0.15968	-0.17647	-0.246611	-0.0851586	-0.147089	-0.102817	-0.130534	-0.173003	-0.170092	-0.236121
Rab1	0.445756	0.48673	0.569297	-0.190336	0.277857	0.031062	-0.056663	0.106573	0.0560322	0.0822579	-0.127166	-0.00448233	0.11814	0.394584	0.115449	0.174982	-0.384802	-0.158198	0.0335133	-0.23484	-0.57835
Ankrd24	-0.0517074	0.10998	0.565275	0.062885	-0.270979	-0.0479648	0.0938559	0.135402	-0.34454	0.0841653	-0.171913	-0.021363	0.0347843	-0.25456	-0.337181	0.256109	-0.109702	0.020964	0.526654	-0.149427	-0.310216
Tsn	0.156284	0.49365	0.5652	-0.132135	0.308231	0.0822526	0.0734494	0.206621	0.538234	0.275039	-0.414398	-0.421478	-0.414171	-0.201954	-0.0934928	0.207242	0.0172325	0.163643	0.34353	-0.0713779	0.0861046
Wash	0.216647	0.0554972	0.565042	0.31126	0.364922	0.094154	0.0984255	0.520228	-0.180075	0.0729012	-0.0112459	-0.236904	-0.0762807	-0.339243	-0.0675968	-0.22355	-0.126627	-0.06423	0.182942	0.0093348	-0.0520846
Ubxn6	0.022678	0.16206	0.563553	0.201101	0.365377	0.288336	0.36025	-0.0160012	0.302573	0.107725	-0.219087	-0.322063	0.0905685	-0.411091	-0.326118	-0.268768	-0.0170865	0.158162	0.0560905	-0.0648736	-0.453205
Pwp1	0.0785102	-0.0335593	0.563105	-0.0693143	0.132996	-0.187011	-0.0472283	-0.0536333	-0.0882065	0.180369	-0.042508	-0.0476007	-0.0149763	0.317783	-0.0966251	-0.105649	-0.0778167	0.0934015	-0.111436	-0.0495889	-0.121109
2610015P09Rik	-0.0112608	0.0733397	0.563077	0.397167	0.560071	0.080007	0.146792	0.253381	0.00146073	0.039429	0.040015	-0.156883	-0.186252	-0.173459	-0.257935	-0.0416176	-0.0395996	-0.167641	0.00227967	-0.121282	-0.0707803
Nudt1	-0.0136784	0.0260693	0.562847	0.368745	-0.0505798	0.07413	0.548745	0.349637	0.0257435	0.294288	-0.304858	-0.155324	-0.1482	-0.432303	-0.34138	-0.126068	-0.176473	-0.305731	-0.359851	-0.128108	-0.363395
Lias	0.133235	-0.0465376	0.562394	0.312443	-0.0737882	0.269501	0.341118	0.33463	-0.0404767	0.108018	-0.338942	-0.307533	-0.330196	-0.0981447	-0.241991	-0.242846	-0.00670326	0.0492697	-0.0105521	-0.0556828	-0.360752
Nrbp1	0.220065	0.23782	0.55816	0.0540033	0.512513	0.268032	-0.119537	0.156081	0.247037	-0.241571	0.0381572	-0.371915	-0.0953096	-0.140025	0.09804	0.171073	0.0727048	-0.321182	0.304538	0.408533	0.150608
Crebzf	0.432189	0.146407	0.557313	-0.0782157	0.232144	-0.0726353	-0.0323591	-0.0483381	-0.340422	-0.128308	0.541549	0.135573	0.0525964	-0.0129866	0.0765344	0.0192724	-0.378605	-0.314746	0.234041	0.0114319	-0.339565
Mrps23	0.0920096	0.236258	0.556378	0.0190076	0.367123	0.0390086	0.335091	0.320966	0.443565	0.244722	0.0644182	-0.249624	-0.289512	-0.209059	-0.340936	-0.28048	-0.12034	0.102253	-0.198869	-0.047154	-0.0985375
Bop1	0.300974	0.0325169	0.555876	0.169695	0.454316	0.0701791	0.0400055	0.18846	0.329763	-0.126244	0.00375917	0.0135491	-0.0377285	-0.0893236	-0.0156263	-0.224682	-0.147569	-0.287675	0.0219354	-0.086091	-0.341433
Ift52	0.536247	-0.179428	0.555675	0.347911	0.0233011	0.33797	0.320898	0.25857	0.275757	0.32107	0.0384048	-0.258782	-0.142508	-0.40869	-0.399457	-0.293929	-0.213186	-0.191069	0.0952096	-0.161999	-0.058973
Casp3	-0.13916	-0.247507	0.553145	0.0121427	0.312861	0.00302779	0.367251	0.459219	0.393809	0.0854131	0.0180892	-0.157713	-0.204421	-0.323821	-0.251853	-0.517632	0.0360746	-0.560606	-0.491445	0.324135	-0.270725
Utp18	0.352815	-0.286254	0.547603	0.325943	0.143347	0.0416856	-0.209264	0.0485071	-0.233371	-0.429409	0.181852	0.116894	0.199913	0.322105	-0.0235496	-0.166993	-0.214983	-0.0643688	-0.328461	0.161726	0.22612
Cenpw	0.242003	0.281642	0.544694	0.0558713	-0.107689	0.191073	-0.0250478	-0.0402399	-0.416976	-0.0426937	-0.176304	-0.239142	0.0825027	-0.265461	-0.0900591	-0.350362	-0.0443154	0.527179	0.166464	0.0469691	0.0480391
Gatad2a	0.327597	0.104175	0.544661	0.00627243	0.264159	0.230339	0.146197	0.0343082	-0.0649739	-0.129377	-0.239547	0.0340236	0.0520187	-0.26543	-0.156831	-0.18571	-0.28268	-0.0167065	-0.291153	0.205117	0.157051
Akap8	0.281511	0.462219	0.54297	0.244422	0.525879	0.396229	-0.112111	0.161428	-0.78355	0.0363348	-0.0125938	-0.190182	-0.431225	-0.297824	-0.0840087	0.0580159	-0.126416	0.221647	0.189791	-0.0344365	-0.0298976
Med17	0.478333	-0.149416	0.542419	0.0528938	-0.120757	0.267204	-0.0897791	0.166658	0.217577	-0.121021	-0.135217	-0.108243	-0.17917	0.109944	-0.0674905	-0.0944379	0.0256272	-0.138795	-0.0680614	-0.0152944	0.0797894
Pibf1	0.219866	0.269582	0.539238	0.305329	0.210342	0.061846	0.0230161	0.0678996	-0.274682	0.00996269	0.172185	-0.177777	0.0222387	-0.303236	-0.026747	0.0685387	-0.0744286	-0.0914168	0.166267	0.00401506	-0.226401
Ttc32	0.234199	0.158385	0.536415	0.0692946	0.260284	0.019775	0.421456	0.218099	-0.0406369	0.127494	-0.183455	-0.256342	-0.246681	-0.0600881	-0.226997	0.0878053	-0.0380244	-0.247582	-0.0386633	-0.213498	-0.27003
Npm3	-0.484953	0.20067	0.533586	0.430328	-0.199474	0.0718909	-0.347751	-0.529441	-0.494396	-0.503258	-0.260768	0.403147	0.0934249	0.213013	0.438218	-0.101483	-0.102859	-0.085231	-0.336687	-0.33303	-0.327531
Gon4l	0.242386	0.0726511	0.529442	-0.0467497	0.478361	0.000722811	0.0484994	0.00818293	-0.0804215	0.315599	0.182173	-0.211797	-0.117322	-0.0932309	-0.215527	-0.231057	-0.0773972	0.235078	0.00570147	-0.138062	0.0217664
Prpf19	0.45363	0.321778	0.529127	0.115918	0.242786	0.325764	0.123571	0.45196	0.423474	0.253864	-0.219478	-0.262244	-0.469995	0.106718	-0.0681506	0.0836054	-0.181215	-0.452693	0.208994	-0.109064	-0.462649
Recql	0.120724	-0.1818	0.528781	0.337048	0.0379186	-0.0183738	-0.0169406	0.061548	0.143168	0.0359906	-0.175498	-0.114531	-0.0612425	-0.0937458	0.00108343	-0.162503	0.0199292	0.102475	0.00218215	-0.106461	-0.0490789
Tfip11	0.214314	0.458941	0.528507	0.210783	0.399501	0.479032	0.108262	0.0888007	-0.12179	-0.00992966	0.0729791	-0.225226	-0.24686	0.223463	-0.196378	-0.448212	-0.118858	-0.264844	0.228306	0.0955637	-0.24192
Psma5	-0.0492564	0.102363	0.528501	0.0674207	-0.003302	0.250794	0.10723	0.301649	-0.206393	-0.529438	-0.483698	-0.117049	-0.0951482	0.278427	-0.165746	0.0505698	0.199434	-0.097963	-0.0339093	-0.228527	-0.540297
Acn9	0.200983	0.0250579	0.52757	0.183286	0.473514	0.0104663	0.154306	0.152833	0.0362566	0.0393739	-0.267334	-0.15145	-0.187916	-0.114415	-0.0809563	0.133015	-0.0957831	0.0886219	0.0934488	-0.203402	-0.0244484
Scamp3	-0.0396663	-0.149803	0.527365	-0.222546	0.465889	0.115001	0.343765	0.416935	-0.163432	0.00137532	0.0413403	-0.181488	-0.177088	0.153864	-0.329965	0.252544	-0.102626	-0.214511	0.0052763	-0.000242524	-0.225304
Ikbkap	0.479012	0.415124	0.523661	-0.0656263	0.377841	0.45238	-0.01404	-0.119785	-0.375179	-0.282071	0.297859	-0.110792	-0.200777	0.0278956	0.0280883	0.174251	-0.279211	-0.0228413	0.498683	-0.133171	-0.168059
Fam76b	-0.0937137	0.180648	0.523081	-0.171997	0.423379	-0.104303	0.0249212	0.113063	-0.233419	0.0152183	-0.21546	-0.0597055	-0.0831012	-0.149717	0.0366639	-0.0145803	-0.0691318	0.0648946	0.0972249	0.0718731	0.040727
Tdg	-0.15355	-0.180851	0.52156	0.104499	0.0906063	-0.0734193	-0.0571889	-0.130813	-0.0513261	-0.0722154	0.0471049	-0.00861141	-0.0204343	0.165984	0.0734936	-0.103478	0.031098	-0.171654	0.330786	-0.108762	-0.229361
Fra10ac1	0.169648	-0.00362877	0.520465	0.0876277	-0.00991901	-0.0940774	0.0395825	0.246465	0.453537	0.00807798	-0.178503	-0.175512	-0.265194	-0.145081	-0.0729702	0.106	0.00878841	0.26717	0.156312	-0.0845806	-0.166924
Gid4	0.33653	0.00347131	0.519949	-0.120231	-0.0325591	-0.085212	0.0116695	0.0945637	0.140581	-0.0712517	-0.231142	-0.275039	-0.133702	0.181583	0.0669454	0.0540642	0.09313	0.145528	0.50045	-0.206825	-0.432697
Polr2b	0.501374	0.0155092	0.51662	0.108709	0.150196	0.363764	0.0127374	0.367091	-0.0394642	-0.262157	0.223575	-0.219022	-0.227363	-0.303099	-0.171703	0.0960087	0.0130365	-0.0523478	0.442691	-0.145173	-0.384013
Cryzl1	-0.0654286	0.012879	0.510894	-0.109665	0.137847	-0.372793	0.116474	0.0041609	0.419526	-0.0254553	-0.287446	-0.25004	-0.319905	-0.295431	-0.146479	-0.0627338	0.222166	0.451807	0.444778	-0.0139093	-0.552379
Rfesd	0.16578	0.0701139	0.509504	0.499062	0.204057	0.229554	0.31056	0.435021	0.28195	0.122579	0.0538353	-0.218063	-0.0919431	-0.315837	-0.091119	-0.234121	-0.160873	-0.373691	-0.107272	-0.171365	-0.104299
Chmp4c	0.19908	0.0387956	0.50412	-0.134797	-0.034897	0.185961	0.324513	0.271516	0.329618	0.261802	0.0413246	0.0402998	0.0918983	-0.254643	-0.289118	-0.290305	-0.293799	-0.379434	-0.298056	-0.281324	-0.235959
Fkbpl	0.0375064	0.388217	0.498027	0.187879	-0.0890413	0.0599536	0.00636417	0.359878	0.124879	0.123215	-0.234989	-0.165626	-0.112508	-0.0710403	-0.103692	-0.10686	-0.0813587	-0.0792945	0.261575	0.0171612	-0.245278
Srsf6	0.287216	0.192367	0.496267	0.0626208	0.287031	0.0184459	-0.0693202	0.0700976	-0.0753888	-0.0962125	-0.156711	-0.019281	-0.223752	0.166908	-0.122942	-0.288034	0.0111454	0.165652	0.494627	-0.525443	-0.899514
Sharpin	0.467198	0.334231	0.495837	0.324747	0.460163	0.297784	0.0321775	0.494654	-0.255208	-0.0666987	0.176673	-0.220648	-0.270161	-0.152164	0.0781981	0.16234	-0.251235	-0.0749296	0.231824	-0.258725	-0.113706
Phf5a	0.189509	-0.0607621	0.495625	0.444467	0.200834	0.132843	0.0763562	0.0702319	0.300037	-0.0992069	-0.00830201	-0.0727449	0.0483025	0.180352	-0.466471	-0.408409	0.0242638	-0.0278449	-0.113424	-0.272766	-0.0721044
Prpf40b	0.100885	0.282978	0.49401	0.0678507	0.0795318	0.112497	0.116884	-0.103635	-0.248351	0.048259	0.196292	-0.151449	-0.135005	-0.046443	-0.134236	-0.109878	-0.0249852	-0.107845	0.222718	0.0562841	-0.294064
Thap3	0.331497	0.4023	0.492191	-0.239	0.39953	0.403766	0.188776	0.385629	-0.447954	0.259188	-0.0701206	-0.449242	-0.377797	-0.347327	-0.00074192	0.164528	-0.0139124	0.0545171	0.153524	-0.305898	-0.365433
Psmg3	0.218179	0.117993	0.491971	0.270183	0.141675	0.416681	0.310814	0.112389	0.267615	-0.0996887	0.0918498	-0.128084	-0.27458	0.0725846	-0.263858	-0.0146369	-0.156851	-0.144012	-0.169858	-0.0714424	-0.202352
Mrpl4	-0.000736762	-0.201594	0.491942	-0.0116678	0.0649278	-0.0931353	-0.414851	-0.1344	-0.150412	-0.0472739	0.160225	-0.250614	-0.243905	0.258453	0.404801	-0.126217	0.178867	0.459623	0.338345	0.218111	-0.368081
Cbx7	-0.0115825	-0.0212424	0.491026	0.0687658	0.289957	0.0958497	-0.183553	0.0230402	-0.196151	-0.0338159	-0.22625	-0.22942	-0.0884332	-0.149141	-0.0776322	0.03474	0.209039	0.361002	0.284832	-0.0361798	-0.227217
Helb	0.0635426	0.0266291	0.490298	0.137703	0.400578	0.112197	0.0209009	-0.0443495	0.253713	0.017052	-0.26041	-0.194475	-0.246684	0.117399	0.0770608	0.351692	-0.0537092	-0.193761	-0.105955	0.159794	-0.212351
Zkscan14	0.0946987	0.20869	0.489594	0.298952	-0.167404	0.0745615	0.0978209	0.148197	-0.11211	0.0374622	-0.150915	-0.108738	-0.153822	-0.120306	-0.0533873	-0.159825	-0.0618488	-0.00904719	-0.0612885	-0.0178647	-0.0352567
Rrp12	0.280243	0.420855	0.486997	0.250041	0.414397	0.46936	-0.0860966	0.0113578	-0.321321	-0.285444	0.178354	-0.075011	0.125509	0.259411	0.0150431	-0.150766	-0.218307	-0.104984	-0.1108	-0.0952943	-0.373508
Rqcd1	0.165012	0.0584625	0.485344	0.0773649	0.0656343	0.0264415	0.050192	0.0486531	-0.030728	0.12102	-0.156911	-0.134247	0.0206921	0.0416478	0.076986	-0.113988	-0.0960222	-0.0209601	0.125817	-0.0887492	-0.112382
Cenpt	0.0568953	-0.00295139	0.483686	-0.0382775	0.0900479	-0.230061	-0.0907893	0.0510282	0.249518	-0.0172008	0.350974	0.0423257	0.0239285	0.251812	-0.0377761	-0.241796	-0.154803	-0.154171	-0.166835	0.204915	0.192864
Coa6	0.319206	0.397013	0.478573	0.474003	0.0746939	-0.258411	0.365901	0.291144	-0.0507986	0.148951	-0.328491	-0.254381	-0.316906	-0.50549	-0.132696	-0.0805333	-0.164305	0.232317	0.0606837	-0.109465	-0.192041
Prpf31	0.239469	0.191875	0.478161	0.133038	0.300359	0.308724	0.175551	0.426823	0.440036	-0.0196509	0.0168261	-0.188642	-0.121856	-0.225064	-0.268841	-0.197435	-0.136721	-0.00321398	0.0439511	-0.0627253	-0.0776522
Lrrc40	-0.0113225	-0.00913427	0.477494	0.0727069	0.192271	-0.15369	0.13847	0.0746337	-0.0374667	0.201452	-0.056596	-0.156351	-0.155055	-0.0223715	0.115287	-0.0842917	-0.0951941	-0.0560821	0.39482	-0.194264	-0.085331
Mcat	0.160001	-0.0299232	0.477356	0.206752	0.242877	0.162793	0.214229	0.448812	0.455016	-0.0196344	0.0674096	-0.104279	-0.116924	-0.154085	-0.24543	-0.0858558	-0.133509	-0.156746	-0.202486	-0.0723645	-0.153217
Zfp386	0.31763	0.305967	0.476666	0.111637	0.278678	-0.0145755	0.11886	0.0331346	0.166843	0.161942	-0.0667889	-0.0879467	-0.102193	-0.268521	-0.0568741	-0.178049	-0.195735	0.0204549	0.244856	-0.222202	-0.122614
Mitd1	0.115885	0.0267306	0.475982	0.324331	0.341075	0.329611	-0.127774	-0.0122997	0.0395497	-0.0511906	0.21096	-0.111602	-0.0452772	-0.134786	0.012433	0.0835071	-0.0307042	-0.430511	-0.0885299	0.120645	0.197611
Phospho2	0.304762	0.151152	0.473017	0.0630754	0.186042	-0.101177	0.156867	0.18523	0.394569	0.203117	-0.0623934	-0.328983	-0.310251	0.138386	-0.0784758	-0.0617108	0.0421445	-0.111062	-0.00573926	-0.0375007	-0.107344
Cep97	0.0168762	0.123744	0.472359	0.0541163	0.242073	0.247416	0.267707	0.287275	-0.21198	-0.0415593	-0.160795	-0.168762	-0.17854	-0.168774	-0.144434	0.12245	-0.0608455	-0.142846	0.149652	-0.156421	-0.19639
Aatf	0.107817	0.225038	0.470252	0.209174	-0.347855	-0.120703	-0.0953255	0.167011	-0.318947	-0.110724	0.159239	0.0695937	-0.012359	0.311169	-0.0578529	0.0245863	-0.219676	-0.0176467	-0.149439	0.00574202	0.162714
Tada3	-0.239453	0.132379	0.46772	0.230924	0.164798	0.0348259	0.028328	0.146403	0.0648166	-0.145122	0.11221	0.077769	0.104398	-0.129378	-0.0678397	-0.470001	-0.11146	-0.163011	0.23652	-0.0422109	-0.259162
Pradc1	0.108567	-0.063654	0.467086	0.0595164	0.182647	0.407023	0.339045	0.107587	0.164682	-0.0203866	-0.215017	-0.216709	-0.0267606	-0.199292	-0.137198	0.0173827	-0.124643	0.0335062	-0.100365	-0.0223653	-0.00143541
Toe1	0.258134	0.313076	0.466308	0.23152	-0.0331565	0.141859	0.0178169	0.0820499	0.15594	-0.0580838	-0.100664	0.00726021	0.0363342	-0.146043	-0.00868739	0.0664512	-0.18655	-0.286876	-0.270448	0.0322604	-0.062814
Pdf	0.291193	0.242247	0.463676	0.234173	-0.0206519	0.010173	0.20395	0.0668544	-0.304858	0.128655	-0.245126	-0.201518	-0.1412	-0.162324	0.04563	-0.250888	-0.0742223	-0.0442921	0.0748434	-0.0337551	-0.276884
Rpe	0.272347	-0.214673	0.460128	-0.0321783	0.387161	0.00504926	0.150492	0.166085	0.0309146	0.145339	-0.180096	-0.0995597	-0.264814	-0.216173	-0.0446239	0.0426637	-0.143795	-0.0992562	0.119775	0.103468	0.0113627
Gm4944	-0.0321484	-0.158672	0.457557	-0.0142356	0.184507	-0.0633226	0.250253	0.131081	0.359404	0.037346	0.0455108	-0.0367736	-0.0847903	0.124754	-0.229033	0.0198721	-0.0989879	-0.205298	-0.127066	-0.0574237	-0.086609
Fgf9	-0.0238251	0.0146831	0.455768	0.225011	0.332433	-0.0479332	0.358597	0.212849	-0.212456	0.0452609	0.0516466	-0.0527908	-0.0766704	-0.222802	-0.189401	-0.19323	-0.111761	-0.223756	-0.179529	-0.128835	-0.206875
Pinx1	0.372684	0.184919	0.455666	0.0415437	-0.234394	-0.180116	-0.190742	0.00210984	-0.369322	-0.0990863	-0.207998	-0.0495131	0.0035705	0.112856	-0.110689	-0.126443	0.0898634	0.0239861	0.147134	-0.0597597	-0.0577642
Golga1	0.230877	-0.124923	0.454367	0.210266	-0.167925	0.174006	0.33525	0.171229	-0.454375	0.11808	-0.101163	-0.0944125	-0.173928	-0.190899	-0.254713	-0.224374	-0.189276	-0.0183987	0.245443	-0.0689138	-0.422879
Vcpkmt	0.273358	-0.235205	0.452699	0.116933	0.270153	0.117446	-0.0438294	0.0991967	-0.170837	0.192599	-0.254741	-0.222988	-0.303418	0.367822	0.0856997	-0.235445	-0.00725497	0.287583	-0.201575	-0.0441172	-0.239302
Polr1d	-0.096556	0.0674433	0.450217	0.159719	0.000706317	-0.180131	0.268113	0.224305	0.131103	0.107549	-0.532179	-0.0171527	-0.0318577	-0.0783415	-0.438417	-0.529381	0.0421326	0.356609	0.130254	-0.348055	-0.814806
Mettl9	0.386873	-0.141507	0.450198	0.0698831	0.369616	0.269623	0.218339	0.184425	0.123955	0.00168467	0.0345669	-0.241696	-0.240254	0.154362	0.201236	0.281494	0.0156508	-0.586819	-0.280355	-0.247342	-0.482994
Sim1	0.31155	0.131485	0.449861	0.114555	0.317265	-0.00213961	0.407149	0.436756	-0.0743006	-0.0112633	0.0989471	-0.0264606	0.00589706	-0.185661	-0.319682	-0.223556	-0.262837	-0.289403	-0.235128	-0.259733	-0.162917
Foxred1	0.144524	0.37199	0.442827	0.187768	0.288839	0.0998009	0.216879	0.152986	0.380708	0.0853912	-0.14747	-0.177652	-0.0592205	-0.319654	-0.160474	-0.0277851	-0.0765816	-0.0660815	-0.0980707	-0.0738112	-0.229136
Ift140	0.219607	0.0966831	0.439479	-0.0579729	-0.152465	0.0306699	0.0452001	0.0209328	0.0093184	0.0308831	-0.157232	-0.11715	-0.0552695	-0.0372439	-0.111469	0.0219653	-0.0875238	0.0380517	0.331121	-0.0226247	0.176594
Smarcad1	0.157499	0.30833	0.438147	0.192279	0.171876	-0.139215	-0.148233	0.0768593	-0.169718	0.030688	0.423229	-0.126972	-0.378694	-0.0876172	0.020863	0.31555	0.0131663	0.0445558	0.115282	-0.181867	0.161904
Snx24	0.0395294	-0.313433	0.437692	-0.076965	0.360209	0.0677976	-0.0422268	0.00928901	0.0183338	0.312897	-0.318513	-0.231162	-0.270613	-0.163325	0.272592	-0.145594	0.133303	-0.0870832	-0.155382	-0.139314	0.372384
Fam118b	0.405575	0.31129	0.43714	0.0129335	0.27939	-0.00996466	0.264158	0.239251	-0.179983	0.0211849	-0.0635612	0.145269	-0.149567	-0.51184	-0.129563	-0.205659	-0.329819	-0.14715	-0.111418	-0.275551	-0.255795
Unk	0.365572	0.267872	0.433905	-0.115127	0.251075	0.334001	0.16582	-0.142308	-0.0281601	-0.0184658	0.340681	-0.106527	-0.273364	-0.102159	0.0457803	-0.189406	-0.154353	-0.0450713	0.205733	-0.173816	-0.323307
Brap	0.339829	0.199352	0.433531	0.309769	0.428168	-0.122818	0.00845998	-0.0159617	-0.341097	0.36413	-0.122954	-0.115409	-0.0806207	-0.2012	-0.0502634	-0.235725	-0.294401	0.073493	0.29886	0.0238173	0.0680167
Sipa1	-0.142722	-0.269219	0.432723	-0.131634	-0.101814	-0.0216323	-0.182941	-0.0935769	-0.180286	0.0131419	-0.0411447	-0.184262	-0.110065	0.0627763	0.146332	0.315922	0.0640926	-0.0823653	0.200076	0.374804	0.189047
Hspa14	0.206054	-0.158313	0.431259	-0.0556978	0.00376745	0.112612	-0.171066	-0.215277	0.298572	-0.275807	-0.297373	-0.0779593	-0.15068	0.163399	0.0841417	0.0820207	0.100895	0.0684023	0.0330476	0.213225	0.165747
Nphp3	0.102295	0.191689	0.43014	0.028134	0.364151	0.339243	0.150907	0.133879	-0.222316	0.105678	-0.116836	-0.192487	-0.104291	-0.114288	-0.0373658	-0.125611	-0.060059	-0.0894433	0.136989	-0.226154	-0.137366
Pex10	0.196432	0.0529125	0.430035	0.0301641	0.0881801	0.110695	0.198195	0.0688761	-0.204606	-0.0538895	-0.272125	-0.134654	-0.209663	-0.161347	-0.115353	0.231457	0.0119482	-0.148154	-0.0981087	0.067551	-0.130017
Naf1	0.0532414	-0.0385239	0.4295	0.0318542	0.332655	0.122963	-0.468342	-0.617317	-0.0812346	-0.242232	0.214063	0.280215	0.131126	0.405026	0.152538	-0.339862	-0.0892583	-0.136993	-0.270934	-0.0674765	0.0149356
Nxt1	-0.00326698	-0.146257	0.427727	-0.122998	0.220497	-0.185146	-0.144579	-0.0426314	-0.281026	-0.0909825	-0.0704924	0.0246769	0.206556	0.0682318	0.0919733	0.0679255	-0.106279	-0.103688	-0.0704939	0.400563	0.0657249
Zfyve20	0.0843254	-0.00324797	0.426184	-0.109944	0.217489	-0.0619266	0.0441206	0.00856424	-0.0191417	0.0512818	-0.0781263	-0.108738	-0.165569	0.133019	0.248934	-0.212893	-0.0150825	0.0895601	0.0333358	-0.131283	-0.22152
Cpox	0.111621	0.147539	0.424982	0.143552	0.281252	0.182449	0.324267	0.0153472	0.139456	2.70394e-05	0.225625	0.0465245	0.0572421	0.0894779	0.113368	0.141865	-0.404516	-0.454412	-0.386865	-0.105927	-0.556866
Pacs1	0.144292	-0.138821	0.422924	-0.0348472	-0.15835	0.0207226	0.0726309	-0.00984763	-0.167416	0.137414	0.00726601	-0.116598	-0.105143	-0.175284	0.0177943	-0.0797323	-0.0379039	-0.103143	0.294762	0.0863151	-0.0774547
Golga3	0.287855	0.309482	0.422911	-0.156265	0.354811	-0.0389836	0.20572	0.0966681	-0.0536515	-0.0233728	-0.106434	-0.13815	-0.028855	-0.142823	-0.0487214	-0.335996	0.0563669	-0.264348	-0.0226031	-0.150537	-0.379618
Srr	-0.0127903	0.363662	0.421663	0.336608	0.184867	-0.031608	0.412719	0.2091	-0.233969	0.0276635	-0.0764832	-0.272822	-0.157808	-0.228022	-0.0346462	-0.178595	-0.0147225	-0.0341754	0.0478288	-0.290321	-0.294722
Tmem125	0.329912	0.121664	0.420118	0.0114043	-0.160346	0.141587	0.133592	0.0353921	-0.0863341	-0.0337035	-0.0631522	-0.00349459	0.125191	-0.0943001	-0.0992407	0.0504542	-0.186437	-0.106693	-0.103708	-0.127812	-0.116622
Ralgps1	0.0490948	0.19915	0.417468	-0.0799395	-0.123859	0.175418	0.17658	0.0786935	-0.144534	0.250522	-0.117774	-0.123316	-0.14108	-0.0382972	-0.0494098	-0.149469	-0.118402	-0.102811	0.0402765	-0.0972899	0.0359516
Efcab2	-0.0158588	0.00402578	0.417083	0.150474	0.00105158	0.29305	0.172592	0.107212	0.00381127	0.0549402	0.00579868	-0.115727	-0.112826	-0.144832	-0.0110872	0.0445564	-0.0757408	-0.0102695	-0.100284	-0.141518	-0.191236
Ccdc58	-0.000736747	0.259364	0.41696	0.0564431	-0.103171	-0.182067	0.153217	0.185448	0.326163	0.0965689	-0.199134	-0.0077902	0.0322197	-0.031876	-0.227859	-0.0377205	-0.113371	0.0920009	-0.0835995	-0.286125	-0.257884
Aptx	0.178606	0.00471094	0.41622	-0.296355	0.150772	-0.266584	0.339747	0.328199	-0.610311	0.247143	-0.0518839	-0.163983	-0.102799	-0.52234	-0.335509	-0.347065	0.0452314	-0.15958	0.29113	-0.152883	-0.318658
Nsmce2	0.187137	0.29076	0.415656	0.116846	0.130413	-0.182393	-0.0282585	0.171093	0.228685	-0.0857187	-0.104314	-0.229754	-0.127376	-0.0330345	0.133528	0.199765	0.0873651	-0.234142	0.179111	-0.0893781	0.288677
Cdk2	-0.116652	-0.180317	0.415184	-0.212565	0.212738	-0.133845	-0.0778297	-0.113028	-0.0593389	0.0827102	0.0830844	0.00891269	-0.100834	-0.0817722	0.103955	0.350871	0.0087736	-0.137627	0.164494	-0.096802	0.0851542
Mettl10	-0.0469553	0.153535	0.414736	-0.085338	0.166696	0.0539392	0.0705697	0.20134	0.276361	0.0731704	-0.251584	-0.201912	-0.117515	0.162949	0.0221806	-0.0565896	0.0288117	0.0637173	0.0602236	-0.0189451	-0.376388
Tada1	0.07124	0.0655429	0.409433	-0.167018	0.269854	-0.00380695	-0.138154	-0.01792	-0.156205	-0.197823	0.27242	-0.146714	-0.0227643	0.157093	0.184323	-0.0861405	-0.0300734	0.0542299	0.136327	0.32311	0.161212
Npepps	0.101737	-0.160037	0.409073	-0.250724	0.0669526	0.262024	0.357017	-0.173508	-0.519808	0.342381	0.118329	-0.0998049	-0.0434696	-0.393906	-0.188437	-0.240505	-0.113935	-0.367965	0.10928	-0.0301837	-0.116285
Endov	0.264033	0.389077	0.40753	0.010134	0.296186	0.218468	0.361644	0.227268	-0.253404	0.0879836	-0.0819675	-0.221324	-0.172064	-0.101856	-0.057014	0.0323052	-0.160866	-0.22121	-0.112473	-0.152566	-0.143347
Epg5	0.369913	-0.0091774	0.405402	-0.203629	0.256511	0.100876	0.0190422	-0.123343	-0.214311	0.104109	0.229782	-0.153536	-0.166514	0.00215962	0.00403428	-0.122335	-0.115593	0.116743	0.40073	-0.108202	-0.0350052
Nucks1	0.363485	-0.0823233	0.403752	0.28818	-0.392278	0.020603	0.293911	0.361295	-0.0793152	-0.249384	-0.156708	-0.139686	-0.507613	-0.269032	-0.00837073	-0.0594625	0.215603	-0.721918	-0.0226351	-0.234938	-0.334127
Med8	0.162195	0.224395	0.402105	0.275733	0.383824	-0.128958	0.104153	0.277631	0.0314935	-0.169431	0.000547011	0.14218	0.148903	-0.0208327	-0.107524	-0.470348	-0.240597	-0.198849	-0.227854	-0.370044	0.161726
Mre11a	0.0363402	0.0366751	0.401887	0.0166965	-0.0337884	0.0751659	0.067782	0.18658	-0.185185	-0.0783833	0.0197545	-0.0388068	0.0146915	-0.0699439	-0.0566137	0.179098	-0.0327579	-0.115394	-0.0261403	-0.115079	-0.173454
Alyref2	0.15126	0.0884074	0.400388	0.23165	0.222157	0.161666	0.0994728	0.127812	0.0901924	-0.102829	-0.0602276	-0.12843	0.0759238	-0.109749	0.163957	-0.0991124	-0.0770186	-0.206139	-0.115086	0.0375417	-0.233267
Klhl28	0.10228	-0.0533038	0.398642	0.142897	0.128622	0.135578	0.0412772	-0.0359899	-0.223667	-0.00951279	0.174919	-0.0900058	0.000580602	-0.0656068	-0.171058	0.0824814	-0.0128193	-0.10272	0.0530317	0.0200337	0.0425272
Mcm7	0.0630728	-0.0627804	0.396217	-0.187623	0.225074	0.296482	-0.0181083	0.0132287	0.323036	-0.00512997	0.0530468	0.0255506	-0.156456	-0.0668662	0.119146	-0.0811818	-0.0858074	-0.0857653	-0.250974	-0.073301	-0.0319309
Ccdc157	0.0769414	-0.121438	0.396165	0.180389	0.145316	0.14458	-0.0791635	0.0113947	-0.122118	0.0448169	-0.175257	-0.131902	-0.122107	0.0353633	0.116671	0.0648805	-0.00103624	0.00905476	0.0795703	0.0703673	-0.147166
Brms1l	0.0414921	0.105097	0.395629	-0.134931	0.343226	-0.421422	-0.110142	-0.0958488	0.152089	-0.0655642	0.151872	-0.0659901	-0.184294	0.101424	0.0539352	-0.0163321	0.115922	0.243964	0.146983	-0.0549898	-0.237233
Cpt2	-0.032541	0.223604	0.393323	0.0926255	0.203832	0.307704	0.136389	0.190154	-0.232428	0.0777391	0.0267218	-0.174471	-0.197298	0.108844	-0.0803437	-0.0219433	-0.127567	0.111557	0.292447	-0.27498	-0.295919
Pak1ip1	0.18803	0.072327	0.393224	0.0107715	0.354292	0.0807453	-0.135222	0.0269485	0.116013	-0.462213	-0.16368	0.329671	0.0222554	0.343453	-0.206519	-0.191589	-0.276825	-0.283297	-0.318137	0.13802	0.1728
Rnf183	0.039262	-0.0590053	0.392105	-0.0202792	0.0822216	-0.0115613	0.388169	0.298751	-0.22541	-0.0134003	-0.0612754	-0.0976412	-0.105432	-0.169276	-0.240471	-0.0841761	-0.0516792	-0.198555	-0.19763	0.0287643	-0.158921
Zfp598	0.0753801	0.35051	0.391191	-0.156097	0.290055	-0.0624235	0.0396689	0.046818	-0.0400244	0.0786256	-0.0123352	-0.279359	-0.280868	0.273207	-0.0332159	0.0158592	0.130346	-0.16223	-0.296799	0.316881	-0.227732
Nfrkb	0.0117243	0.146722	0.390529	0.379422	0.323276	0.169842	0.0391195	0.0771478	-0.0562856	-0.00422096	0.030489	-0.117392	-0.127636	-0.160722	-0.12366	0.0622592	-0.0371421	-0.156708	0.0663616	0.0655883	-0.0136897
Pced1b	0.0245879	0.0966511	0.38921	0.161115	-0.146711	0.0533563	0.103128	-0.0670001	-0.100958	0.0244813	-0.0321599	-0.0692374	-0.0578472	-0.107724	-0.0431816	-0.0441088	-0.0129099	0.0306281	-0.041757	-0.0854533	-0.117559
Hnf1b	0.322944	0.0669628	0.386575	-0.111951	0.236503	-0.119755	0.232112	0.280231	-0.297892	0.301417	0.234723	0.113184	-0.0940703	-0.310955	-0.322078	-0.20273	-0.330473	-0.321014	-0.189393	-0.188791	-0.203557
AK010878	-0.0084297	0.098293	0.386343	0.240161	-0.107399	0.32328	0.0532404	-0.298695	0.0510625	0.17754	-0.178278	-0.0357335	-0.0243153	-0.0466438	-0.087458	-0.0366849	-0.106212	-0.1192	-0.163304	-0.0018959	0.1087
Casp2	0.20552	0.290702	0.385684	0.0822126	0.347349	0.180126	0.0825079	0.186672	0.229157	0.00761101	-0.229259	-0.120788	-0.165279	-0.252211	-0.252046	-0.0900594	-0.124437	0.370216	0.00828367	-0.0314025	-0.0157229
Abcb6	0.204935	0.167277	0.385534	0.068651	0.357122	0.202984	0.0116778	0.219949	0.185094	0.0509821	0.110786	-0.18203	-0.128719	-0.0359493	-0.12446	-0.206421	-0.101562	0.0113989	0.337218	-0.0865604	-0.189303
Saysd1	0.149448	0.0841872	0.384424	0.0451922	0.157075	0.284652	-0.110171	0.149025	0.0166799	-0.0133871	-0.240694	-0.219514	-0.0839757	0.0285029	0.16897	-0.165426	0.0418698	-0.137365	-0.00402998	0.242013	-0.195996
1700040L02Rik	-0.127681	-0.0446774	0.38442	0.177306	0.233977	0.339444	0.140934	0.321766	-0.154853	0.206379	-0.123198	-0.170582	-0.136606	-0.16124	-0.130773	-0.141385	-0.025479	-0.0614885	-0.0991737	-0.109625	-0.149887
Brpf3	0.0486413	-0.192864	0.379275	-0.103537	-0.191549	0.273126	-0.024738	-0.0640829	0.352878	0.285307	0.148012	-0.0550372	-0.0840575	0.0959723	-0.0845038	-0.0767668	-0.079873	-0.211865	0.201077	-0.200597	0.0162215
Mfap1a	0.232885	-0.18007	0.376887	0.357578	-0.342267	0.054166	0.00792325	0.320817	0.324129	-0.0851778	-0.0178277	-0.39998	-0.299202	0.0953007	-0.0641677	0.0637713	0.288575	-0.261048	0.176139	0.144364	-0.477754
1700029J07Rik	0.116017	0.339383	0.375469	0.0907265	0.365345	0.0220509	0.182496	0.227431	0.160139	0.0731904	-0.0687488	-0.142196	-0.173108	-0.192572	-0.162329	-0.165365	-0.031272	-0.148916	0.0841283	-0.151939	-0.0701352
Ago4	-0.225642	0.297133	0.374567	-0.0516365	0.119062	-0.0985216	0.0766386	-0.0635702	-0.0293187	0.146039	0.140281	-0.00037386	0.00808887	-0.0640155	-0.0898179	-0.0314898	-0.0948723	-0.101059	0.118157	-0.150422	0.145836
Hmg20a	0.0609055	0.0792357	0.369184	-0.0158582	0.0586657	-0.0688026	0.0318119	-0.0457887	0.235784	0.112424	0.0593096	-0.0570028	-0.105697	-0.0801091	0.030806	0.0291198	-0.0410877	-0.0302886	0.0589893	-0.0481807	-0.156684
Pskh1	0.137748	0.12997	0.36743	0.0674849	0.0945936	-0.000364468	-0.00908401	0.132619	0.079876	0.156624	-0.137727	-0.100041	-0.169511	0.0567418	0.0451296	0.00663953	-0.0271002	-0.0457642	-0.0326308	-0.121255	-0.121543
Tmem17	-0.0761443	-0.158225	0.36716	-0.116791	0.262652	0.0865042	-0.0621293	0.19051	0.172356	-0.0233862	-0.157321	-0.0457408	-0.138927	-0.149802	0.0541517	0.256538	0.00503014	-0.0211617	0.0469097	0.056821	-0.135991
Blmh	-0.426242	0.289817	0.366687	-0.254315	-0.390198	0.0827154	-0.107457	0.142895	0.199331	-0.245561	0.317583	-0.00699691	-0.137672	-0.0134566	0.293462	-0.0924341	0.0303912	0.140283	0.145864	0.00916226	-0.368657
B3galt6	0.24777	-0.0525	0.365779	-0.146479	-0.0183434	0.231059	0.0363028	0.13693	-0.0817609	0.0136	0.273677	-0.00477055	-0.169788	0.298728	-0.0668246	0.266828	-0.19463	-0.217144	-0.0793848	0.00268029	-0.377234
Nek4	0.204162	0.252901	0.365757	-0.0526332	-0.00402536	0.118823	0.147354	0.0954585	0.0683504	-0.00245218	0.0102683	-0.118797	-0.0903373	-0.0902455	-0.0521539	-0.0673763	-0.0479864	-0.0410647	0.042121	-0.141488	-0.151377
Dscr3	0.00492906	-0.210129	0.365158	-0.132788	-0.109891	-0.0559395	0.00726065	0.0341261	0.158162	0.170818	-0.0648324	-0.0277137	-0.203809	-0.153451	-0.000842417	0.120549	-0.0430506	0.103184	-0.0157491	0.0434513	0.00659686
Catsper2	0.053936	0.348023	0.364166	-0.0257041	0.0667385	0.262586	0.124441	-0.061654	0.169227	-0.0313577	-0.130998	-0.0981756	-0.0647881	-0.148532	-0.005488	0.0985437	-0.0539551	-0.14825	-0.00273699	-0.00202636	-0.0435829
Zfp507	0.319618	0.138655	0.36018	0.244161	0.106975	0.0830279	-0.0405	-0.00887596	-0.227303	-0.0425888	-0.218138	-0.0261578	-0.176055	0.0180006	0.031708	-0.237825	-0.0828385	0.279529	-0.0830441	-0.0871676	-0.234492
Phf7	0.115397	0.26084	0.358629	-0.0162531	0.210761	0.130959	0.158697	0.0844432	-0.131964	0.0229874	-0.0793019	-0.0726896	-0.0483319	-0.139463	-0.145432	0.00327297	-0.0886275	-0.0749969	-0.0757843	-0.0519285	-0.0385757
Ap5z1	0.324145	-0.164513	0.355225	0.308245	-0.0157338	-0.0215923	0.0859916	0.294314	-0.101845	0.311608	-0.157119	-0.144761	-0.118922	0.0744867	-0.114742	-0.0322297	-0.137643	-0.0888366	0.0486972	-0.131633	-0.0444616
Clns1a	-0.0359241	-0.100861	0.347416	0.129714	0.0318867	-0.170628	0.0534652	0.143611	-0.251185	0.0618498	-0.0764072	0.0636737	-0.0735243	0.31751	-0.15906	-0.15578	-0.125834	-0.195223	-0.215049	0.223501	-0.361195
4933427D14Rik	-0.0520406	0.249589	0.344909	0.0366238	-0.336488	-0.0837162	0.0263559	-0.0673278	0.124591	-0.00731739	0.225407	-0.199007	-0.135208	-0.0634138	-0.155617	-0.171082	0.229571	-0.148633	0.0996366	0.0634661	-0.232377
Stx4a	0.0533095	-0.110751	0.344589	-0.212494	0.247876	-0.146268	0.00888103	-0.164602	-1.18096	0.0290305	-0.405268	-0.339819	-0.0964378	0.278769	0.290502	-0.0881837	0.145122	0.244998	0.342225	0.144009	-0.0208331
Dhx38	-0.0154194	0.00770566	0.341681	-0.0574117	0.0952333	0.00407506	-0.124909	-0.0377757	-0.386908	-0.03812	-0.214761	0.0176288	0.0258796	0.0590052	0.154252	-0.126457	-0.0481343	-0.110963	-0.101116	0.2839	0.100188
Xrcc6bp1	0.088978	0.0256295	0.340539	0.0787922	0.026088	0.0288996	-0.00928048	0.152756	0.164664	0.000456306	0.0306423	-0.0776442	-0.0790611	-0.010999	0.0425312	0.0996548	-0.0166873	-0.0510909	0.00116213	-0.0382689	-0.124822
Casp9	0.132397	0.149295	0.339326	0.234599	-0.136387	0.186594	0.210985	0.262331	-0.167206	0.172295	-0.0457676	-0.11311	-0.156245	-0.117326	-0.109474	-0.155673	-0.149153	-0.0692008	-0.102635	-0.12407	-0.0641396
Rufy2	-0.0477095	-0.0834854	0.337626	0.00365432	-0.0457077	-0.026734	-0.0244146	0.139686	-0.230434	0.0494029	-0.128331	-0.13301	-0.093335	0.0883099	0.0348314	0.0941709	0.110642	-0.0806062	0.0546692	-0.0065795	-0.227002
Tbl1x	-0.268023	-0.0454381	0.336893	-0.27438	0.0546821	-0.1101	-0.171896	-0.224821	0.0112692	0.188023	-0.207103	0.115712	0.00284024	0.194079	0.0751062	-0.15823	0.139135	-0.519118	0.333969	-0.31028	-0.52687
Zcchc9	0.0713622	0.124372	0.335895	0.0649622	-0.105554	-0.26391	0.059807	0.183808	0.0831683	0.00942179	0.161952	0.0683696	0.0613169	0.0166105	0.10653	-0.145625	-0.0633366	-0.155931	-0.141418	-0.475284	-0.378821
Gpn3	-0.0382846	0.120059	0.33293	0.223397	0.206211	0.21067	0.197041	0.240779	-0.379137	-0.0965106	-0.0729148	-0.248967	-0.286884	-0.0960854	-0.0367262	0.14406	0.104343	-0.0797505	-0.123653	-0.103729	0.07268
3110052M02Rik	0.16759	0.085036	0.32812	-0.00612609	0.0760691	-0.0584522	0.147763	-0.0614607	-0.124014	0.0454503	-0.126011	-0.0919262	-0.0899111	-0.130522	-0.0175053	0.0167948	-0.00776805	-0.0573023	-0.0650373	-0.0507786	0.0750058
Cep76	0.0886293	-0.0807542	0.327092	-0.16251	-0.0626386	-0.0822184	-0.154198	-0.145601	0.0836787	-0.101006	-0.113315	-0.102304	-0.0960916	0.130884	0.206984	0.155293	0.169872	0.0816331	0.243836	-0.152772	-0.128526
Pdik1l	0.235899	-0.189955	0.323089	-0.137995	0.16381	0.060443	0.0994347	0.172977	0.217538	0.0460412	0.00299959	-0.10017	-0.220352	-0.0441297	-0.0580958	-0.129501	-0.0393961	0.00310297	0.155476	-0.0198723	-0.0416032
Mterf4	0.0316516	-0.144671	0.321797	-0.0429252	0.26756	-0.0481278	0.0962187	0.0225383	0.125271	0.00750901	-0.118363	0.0379068	-0.0931627	0.0803177	-0.100778	0.116728	-0.0865998	0.0247065	-0.0727379	-0.110628	-0.104888
Gemin7	-0.348137	-0.264297	0.320751	-0.314558	-0.379931	-0.377796	0.0330464	-0.0409662	-0.278752	0.174571	-0.536557	0.277083	0.00122268	-0.116224	0.027212	-0.422725	-0.131309	-0.240621	0.084819	0.0732503	0.116777
Mier2	0.0725639	-0.107394	0.320357	0.0536716	0.252453	0.0893842	0.0407224	0.0663776	-0.241733	0.206393	0.112497	-0.0892433	-0.177869	-0.0900915	-0.0823206	-0.0431612	-0.0148305	-0.0772043	0.246572	-0.147331	-0.256859
Ylpm1	0.195686	-0.0249947	0.317904	-0.208419	0.241066	-0.0014448	0.0441117	0.186123	-0.361194	0.195303	-0.032448	-0.240514	-0.079032	-0.206639	0.0477538	0.046028	0.0562315	-0.0901977	0.239107	0.0333246	-0.218491
Rnf43	0.197352	0.11144	0.311052	0.0749551	0.216235	0.147183	0.0403611	-0.112329	-0.149031	0.0785135	0.217897	0.0115447	-0.109915	-0.16001	-0.0595125	-0.200823	-0.123058	0.227135	-0.168199	-0.206619	-0.174033
Lyrm1	-0.0303581	-0.164229	0.309502	-0.120921	-0.257638	-0.00667222	0.0366541	0.107183	-0.315758	-0.123921	0.0366244	0.0624158	0.0386747	-0.0884439	-0.0827027	0.0446348	-0.0851645	-0.181876	0.130651	0.148781	0.204081
Rwdd4a	0.213415	0.210013	0.308323	-0.138565	-0.0463862	0.108283	-0.0677518	-0.013375	-0.518791	-0.0886596	-0.0948301	0.002562	-0.0520934	0.245393	-0.0217438	0.0151459	-0.0129403	-0.302524	-0.0199979	0.143859	-0.240756
Ino80c	0.0742359	0.120784	0.307957	-0.145611	0.178645	-0.148878	0.00264474	-0.108038	0.0214039	0.251103	-0.122043	-0.140477	-0.142173	-0.00173379	0.202141	-0.0835074	-0.0339828	0.0311477	0.0463149	0.142733	-0.21467
Ccdc71	-0.000983555	-0.0407192	0.301099	0.0600139	-0.184766	-0.103552	0.0258859	0.0987824	0.0478071	0.173876	0.261572	-0.090136	0.0701672	-0.0760805	0.10449	-0.0474689	-0.0589571	-0.174978	-0.00436684	-0.0442799	0.0438014
Zcchc10	0.0221173	0.236961	0.293548	-0.0874263	0.229942	-0.142111	0.0177249	-0.139016	0.0325607	0.192157	-0.243937	-0.148337	-0.214571	0.15492	0.192245	0.0610532	0.0563688	-0.172963	-0.0383673	0.107081	-0.314171
Telo2	0.12656	-0.0629642	0.292291	-0.0415046	0.139251	0.0347846	-0.0136069	0.073581	-0.122307	0.0991678	-0.0771168	-0.107476	-0.0357274	0.0923729	0.0384003	-0.148133	-0.0179809	0.0166284	0.11331	-0.0452444	0.0504364
Nup43	0.264047	-0.106996	0.291645	0.0418405	0.27114	0.0369773	0.114335	0.13068	0.0214805	-0.113223	-0.0698124	-0.00845886	-0.023634	0.0924431	-0.0101376	-0.0898279	-0.112375	0.0399232	-0.123633	-0.180845	-0.107448
AI846148	0.00487784	-0.0454021	0.290476	-0.173592	0.0610532	0.0242343	-0.240968	0.198978	-0.121758	-0.134722	-0.121165	-0.116984	-0.000136618	0.123508	-0.0546234	0.040714	0.220222	-0.0619085	0.160335	0.0898014	-0.109687
Exosc1	0.123255	0.148598	0.286791	-0.199221	-0.264982	-0.135846	-0.00486331	0.232981	0.259288	-0.0718133	0.102519	0.0514368	-0.0807233	0.239009	0.166153	-0.384257	-0.149228	0.0778995	-0.261202	0.017036	-0.211401
Mto1	0.123281	-0.167287	0.285279	-0.00156878	0.201124	0.139506	0.114736	0.177894	-0.234981	0.0995815	0.0244717	-0.0196091	-0.154639	-0.0654657	-0.120236	-0.112952	-0.0957986	-0.0541375	0.0704462	-0.100408	-0.116461
Ddx28	0.207029	-0.0352674	0.281317	-0.0797529	0.133622	-0.145061	0.0270419	0.00377502	-0.175787	-0.0249691	0.0307386	-0.0714123	-0.176758	-0.0102598	-0.156386	0.0762346	0.052133	-0.0541106	0.139236	0.0331417	0.177116
Zbtb39	0.0835699	0.0841359	0.279257	0.0406133	0.0527587	0.094524	0.00862837	0.135877	-0.146321	0.0475353	0.0544167	-0.0451884	-0.0245013	-0.0343675	-0.0824473	0.0181703	-0.113341	-0.0173721	0.159596	0.0340812	-0.155502
Nif3l1	0.270005	0.208836	0.276092	0.0745758	0.275405	-0.0272901	0.111592	0.0359523	-0.250897	-0.0957225	-0.233493	-0.143688	-0.0536569	0.13767	-0.0654943	-0.102477	0.0131454	-0.0356709	0.125869	-0.0167449	-0.259872
Tbc1d5	-0.0798566	0.10546	0.275718	0.210141	-0.0767977	-0.160972	0.0744439	-0.0575835	-0.206039	0.0407451	-0.0388424	0.00738121	-0.0060453	-0.0465893	0.0111045	-0.0385563	-0.0657139	-0.0566933	-0.0733326	-0.0149891	0.0666521
Lztr1	-0.0776765	0.22007	0.268798	0.095178	0.166572	-0.040311	0.0714116	0.0296966	-0.0066419	0.201825	-0.0438736	-0.157108	-0.0756331	0.0694495	0.103405	0.159008	-0.0361232	-0.280578	-0.0547726	0.114942	-0.127729
Exosc3	0.238792	0.136248	0.266844	-0.0270515	0.15559	-0.134077	-0.019569	0.0942549	-0.0173137	-0.196388	-0.158606	-0.0698136	0.114506	0.171476	0.210223	0.0203382	0.0555249	-0.19895	-0.396453	-0.0942022	-0.0277593
Smndc1	0.0517799	0.0953714	0.266044	-0.196804	-0.402089	-0.142659	0.156879	-0.0170583	-0.500903	-0.199545	-0.0827755	-0.028507	-0.356697	-0.0177454	-0.0563682	-0.263604	0.115709	0.0325585	0.189953	0.165972	-0.281015
Fam216a	-0.0404155	0.126289	0.255792	0.215458	0.199973	-0.201465	0.0416424	0.0688458	0.229428	-0.0279908	-0.170254	-0.130899	-0.203089	-0.172874	0.0740311	0.0016967	0.175794	-0.162176	0.0696151	0.0475346	-0.386606
Zfp747	0.112874	0.149083	0.255632	0.23627	0.0438656	0.0168248	0.0491309	-0.0782538	-0.133464	0.0918671	0.0184436	-0.0474602	-0.0683141	-0.0831062	0.00244828	-0.00904001	-0.102011	-0.0881418	-0.0916123	0.0737919	0.0291955
Znhit6	-0.0880968	-0.184343	0.255333	-0.311603	-0.237757	-0.280059	-0.118679	-0.140034	-0.105176	0.00906245	0.0750693	0.163963	0.0872108	0.045452	0.247805	0.11087	-0.0322836	-0.185645	0.033112	-0.0882153	-0.3466
Coq3	0.153775	0.0384948	0.251423	-0.0413897	-0.131213	-0.0230892	0.0684298	0.233561	0.100961	-0.0727173	0.0447851	-0.0766326	0.0546145	-0.155435	-0.18272	-0.0836093	0.00602783	0.105319	0.112043	-0.111312	-0.0843761
Taf8	0.00361365	-0.0305237	0.249603	0.0102724	0.195541	0.102269	-0.0361455	0.114572	-0.151027	0.0556739	0.0167019	-0.0466086	-0.14589	0.127647	0.048448	-0.107797	-0.0205634	-0.103263	0.129452	-0.0355199	-0.0766679
Vps39	0.0848191	0.0302659	0.240785	0.0835013	-0.150626	-0.0645798	0.0189986	0.105929	-0.150147	0.132326	-0.193183	-0.0687215	-0.0250127	0.00750688	-0.0946292	0.129359	-0.0270612	0.145539	-0.15755	0.0045771	-0.157318
Arid3b	-0.00413873	-0.0248364	0.240771	0.133735	0.238993	-0.012601	0.170656	0.180432	0.115783	0.0998013	-0.106811	0.0292525	-0.107358	-0.192923	-0.165121	-0.145595	-0.0964288	-0.100415	-0.11841	-0.0374592	-0.170141
Rabl3	0.0114166	-0.0097371	0.238171	0.174252	0.0667433	0.0618388	0.115376	0.00723177	-0.19227	0.017075	-0.0302227	-0.0249145	-0.0876032	-0.0400924	-0.0988738	-0.176613	-0.0501322	-0.0621784	0.0633464	0.0302222	-0.0875716
Pcgf3	-0.0757178	0.103682	0.237753	-0.265452	-0.0564198	-0.108415	0.201693	-0.0554345	-0.435674	0.188642	0.204174	0.0141909	0.00531666	-0.18394	-0.0886043	-0.0662895	-0.0986693	-0.146615	0.0298097	-0.0473908	-0.173483
Rb1	0.227525	0.137018	0.231851	-0.270457	-0.22431	-0.0853147	0.0617695	0.190864	0.0961525	0.151625	-0.180934	-0.0329344	-0.0288601	-0.455907	-0.325867	-0.160473	-0.00671984	0.099341	-0.0661181	0.13204	-0.0772692
Adprm	0.171624	-0.117535	0.231793	-0.174102	0.121359	0.179811	-0.0515541	0.0357607	0.0825666	-0.0866951	0.181486	-0.071957	-0.162703	0.0139669	-0.0320228	0.0670747	0.00894546	0.114144	-0.0272835	0.139821	-0.0533459
Fam35a	0.192677	0.149026	0.230926	0.100206	0.0741107	0.0855123	0.190073	0.0341017	0.112167	-0.0674687	0.0713696	-0.0851968	-0.0995447	-0.174795	0.032228	-0.123262	-0.0119619	-0.0826238	-0.161491	-0.128552	-0.146968
Mob1a	0.0911854	0.0618995	0.228135	0.0485768	0.00403458	-0.136242	0.0338321	-0.121718	0.131483	-0.00949497	-0.0826079	0.0129641	-0.018336	-0.0406729	0.0994231	-0.0192211	-0.0187767	-0.131063	-0.092045	-0.0319744	0.0210305
Gfm1	-0.0703477	-0.181918	0.227862	-0.264442	0.0223826	-0.037864	-0.0221321	0.0139842	-0.0119973	0.0774866	0.0487419	-0.0270784	-0.035594	0.218807	-0.140068	-0.00373406	-0.0174397	0.0902649	0.216614	0.104525	-0.217373
Sart3	-0.0938674	0.0168358	0.222359	-0.0119697	0.185476	0.0637097	-0.0881401	0.164509	-0.358592	0.0997991	0.178714	-0.097754	-0.112605	-0.108767	0.0755125	0.0175952	0.10485	-0.190746	0.0126733	0.0423142	-0.212545
Tprn	0.0942913	0.138276	0.219386	0.0582818	0.0591395	0.0556462	0.0221987	0.0988241	-0.0765705	0.0821457	-0.0703528	-0.0164413	-0.059771	-0.0303302	-0.0478846	-0.0428374	-0.100977	-0.0502556	-0.0911879	0.0582498	-0.00901776
Tfpt	-0.0103307	0.183985	0.21208	0.00861657	0.0657193	0.000503087	0.0935746	0.0546304	-0.23215	0.0519453	-0.354356	-0.0998864	-0.281945	-0.0349997	-0.0321823	-0.0902013	0.123687	0.0670761	-0.0340506	-0.0910747	-0.307312
Mettl17	0.140025	0.14904	0.204991	-0.0374639	0.0288034	-0.068675	0.0621262	-0.0405943	-0.154854	0.0283484	0.192239	-0.0548817	-0.0335263	0.00628306	0.00462216	0.00247569	-0.028655	0.0100919	-0.0963761	-0.0634966	-0.061133
Gmeb2	0.0117856	-0.21169	0.198424	0.0461131	-0.103669	-0.126473	0.0140408	0.0228564	-0.240918	0.0630471	0.166416	0.0588611	0.152401	-0.0324301	0.0935805	-0.131685	-0.143541	-0.0696277	-0.0836899	0.0802658	-0.172796
Sepsecs	-0.0105491	-0.0552066	0.133729	0.043355	0.00664531	0.0336725	0.019382	0.0434885	-0.136966	0.000721215	-0.0706477	0.0299617	0.0711056	0.0330728	0.0240091	0.0943047	-0.0786608	-0.0687004	-0.070051	-0.0202793	-0.0557971
Senp1	0.115108	-0.259593	0.121157	-0.189174	-0.201179	0.0804381	0.0931072	-0.0133636	-0.0826081	0.0640991	0.0655103	-0.0571552	0.0363023	-0.0649157	-0.103277	-0.0772478	0.0154935	0.0416952	0.0838395	-0.00303686	-0.190308
Ltf	0	-1.52695	0.34788	0.040777	4.75009	3.79717	-1.15081	-0.638917	-1.35732	-1.77225	-1.83354	-2.0614	-2.28128	-1.65608	-1.7189	-2.9117	-2.47182	-1.91178	-1.85562	-1.59242	-2.00869
Bsph2	0.0443209	-2.89232	1.41397	0.915279	3.94609	-0.122868	-0.0496231	-0.0102742	-0.00962615	-1.58925	-2.78445	-1.28731	-1.57754	-0.159304	-0.119704	-1.95812	-2.19719	-0.226774	-0.160288	-0.64694	-0.858929
Ces5a	2.14129	0.398232	0.782789	0.19784	3.85316	3.55042	-0.786367	-0.494078	-1.1859	-3.0132	-3.14324	-2.80391	-2.8949	-1.30568	-1.22954	-3.22441	-3.61015	-1.34228	-1.61132	-2.21549	-2.30047
Defb22	-0.107972	-2.21768	1.84801	-0.27533	3.79204	-0.990652	0.00864973	-0.0112725	-0.0105635	-1.76865	-2.57483	-1.37572	-1.54058	-0.161857	-0.122542	-2.34739	-2.22765	-0.141299	-0.130045	-0.800939	-0.882738
Man2b1	0.202991	-2.13785	1.37291	0.0439054	3.76699	1.30857	-0.287985	0.0281173	-0.378612	-0.860848	-0.246191	-0.846252	-1.3585	0.242288	-0.195282	-0.843847	-1.5723	-0.416027	-0.313014	-0.55861	0.792616
Cwh43	0	-1.82999	1.61993	0.0468311	3.71119	2.78427	1.54437	0.834615	0.682011	-1.90923	-1.83944	-1.84019	-2.16594	-1.8667	-1.93732	-2.1537	-2.321	-2.02134	-1.76899	-1.84215	-1.98587
Prom2	1.85909	0.268296	0.870353	0.10785	3.68673	2.80299	-0.19792	-0.0755733	0.0830441	-2.22023	-1.70363	-1.83368	-1.93536	-0.566582	-0.55561	-2.30496	-2.8075	-0.737772	-1.02728	-1.38743	-1.27336
Ly6f	0.276603	-2.95775	1.29438	0.235634	3.67568	3.00122	1.29252	1.02131	-0.148492	-1.91167	-2.83696	-2.88251	-3.55612	-3.1156	-3.32603	-3.78237	-3.44058	-3.35271	-3.34111	-2.46765	-3.73227
Abca2	1.47045	0.649985	0.821042	0.366195	3.66498	1.98463	-0.206422	-0.0185057	-0.35304	-0.86316	-1.66773	-1.61089	-1.6606	-0.433546	0.0514258	-1.37777	-2.02157	-0.127812	-0.126312	-0.93614	-1.22126
Prom1	1.5056	0.0647799	1.05103	0.0839502	3.57896	2.92413	-0.0262705	-0.409134	-0.624857	-2.31045	-1.1588	-1.76103	-1.72529	-0.764372	-0.810839	-3.19675	-2.70778	-0.905523	-1.07819	-0.62918	-1.65618
Cpn1	0.0102222	0.601992	0.989767	0.193451	3.52947	0.289401	0.0436524	0.0139615	-0.00991531	-0.719986	-0.797192	-0.724947	-0.764458	-0.0726764	-0.0713946	-1.12436	-1.03133	-0.055268	-0.0931677	-0.421328	-0.429559
Glb1l2	1.70663	-1.18921	1.20487	-0.330437	3.52362	2.21529	1.7314	1.32231	0.275405	-0.88488	-0.884482	-1.28195	-1.31294	-1.90411	-1.92989	-1.88215	-2.37464	-1.95304	-1.77748	-1.69057	-2.03193
Car4	-0.484819	0.115134	1.33455	0.336811	3.47753	-0.44437	0.111114	-0.008733	-0.00817797	-0.876196	-1.60725	-0.779423	-0.687083	-0.0896922	-0.0556966	-1.26966	-1.28431	-0.0870595	-0.127787	-0.244397	-0.478454
Glb1	1.28492	-0.456203	0.923342	0.0311238	3.4697	2.15522	0.209123	0.174024	-0.133854	-0.908083	-0.178575	-0.974272	-0.97558	-0.136859	-0.305221	-0.909839	-1.38074	-0.41837	-0.457986	-0.689296	-0.492914
Slc35f2	0.734504	0.179419	0.792948	-0.147181	3.45469	2.39528	0.569221	0.104872	0.222972	-1.21312	-1.06463	-1.10686	-1.17518	-0.412582	-0.58756	-1.62742	-1.42645	-0.712769	-0.598867	-0.387106	-0.849871
Lrp2	0.0168155	-0.797024	1.14445	0.0617539	3.34587	2.66849	0.152137	0.102603	0.059289	-1.3442	-1.16281	-0.998657	-1.22447	-0.410853	-0.465486	-1.13698	-1.44131	-0.605271	-0.577154	-0.669003	-0.941368
Defb26	0.0325826	-1.66657	1.54131	0.0916642	3.32509	0.47017	-0.00610499	-0.00300804	-0.00281547	-1.02414	-1.2969	-0.784373	-0.908508	-0.0778416	-0.0620057	-1.49702	-1.17229	-0.049884	-0.091514	-0.333658	-0.397348
Glb1l3	-0.0291606	-1.05916	1.95018	0.209043	3.28243	1.16217	1.0388	1.10479	0.348561	-0.724899	-1.49659	-1.07757	-1.14373	-0.987568	-1.04428	-1.26626	-1.40104	-0.765639	-0.576049	-1.05864	-1.0834
Slc7a4	1.62456	0.215072	1.32396	0.318203	3.28	2.55148	0.282864	0.61672	0.668272	-1.35767	-1.3453	-1.46448	-1.54896	-0.597116	-0.661113	-1.76178	-1.87653	-0.654004	-0.564994	-1.08298	-1.01018
Mme	-0.71037	-1.54805	0.674535	-0.539602	3.25281	2.21666	-0.930352	-0.864037	-0.036844	0.93237	-1.29045	-1.35524	-1.56904	-0.268545	0.412633	-0.654269	-0.711364	-0.00778802	0.739949	-0.738644	-1.38642
Gldc	-0.0704317	0.538335	1.66479	0.0272234	3.21436	2.13663	1.16391	1.29232	0.0513278	-1.20575	-1.5489	-1.39194	-1.46112	-1.07943	-1.34287	-1.80172	-1.61076	-1.30149	-1.14654	-1.19154	-1.53135
Cyp51	1.92144	-0.386875	0.801993	-0.140825	3.19741	2.67141	0.960605	0.32043	0.264314	-0.907864	-0.427411	-0.973356	-1.25988	-1.03229	-1.448	-0.538846	-1.24815	-1.44351	-1.349	-1.62552	-1.51794
Txndc16	0.519258	-0.221872	1.43262	-0.180029	3.14706	1.90545	0.00912589	0.193711	-0.0198705	-1.00491	-0.74512	-1.05167	-1.15238	-0.072332	-0.0125092	-0.941174	-0.914777	-0.296019	-0.0611153	-0.615846	-0.326352
Scd2	1.90824	-0.0762938	1.03864	-0.273138	3.07636	2.10033	1.42152	0.618469	-0.179334	0.0264789	-1.34776	-2.09368	-2.45246	-1.9607	-1.75833	-1.02696	-1.87512	-0.32331	0.424929	-1.75778	-2.43953
Cyp17a1	0.000291803	-0.968085	1.29999	0.379	3.066	0.26808	0.01134	-0.00621876	-0.00582701	-0.540874	-0.631064	-0.516327	-0.597512	-0.0535874	-0.0524109	-0.572565	-0.738367	0.0257697	-0.0645696	-0.290629	-0.321856
Ints1	0.170972	-0.511665	0.955721	0.112179	3.03531	0.0633318	0.0415698	-0.0158373	-0.155281	-0.0759436	-0.599879	-0.502567	-0.612182	-0.19451	0.00448543	-0.197381	-0.647217	0.170105	0.102627	-0.268823	-0.27571
Ch25h	-0.367622	-0.511283	1.21819	-0.151503	3.02805	2.66516	-0.600167	-0.197483	-0.717591	-1.39688	-0.919098	-1.34209	-1.29911	-0.422136	-0.615268	-1.09504	-1.45786	-0.929311	-0.895911	1.35503	1.01876
Slc9a6	0.303583	0.587755	1.50002	0.344716	3.01832	1.67966	0.523303	0.338122	0.203833	-0.671615	-0.879967	-1.15372	-1.24016	-0.690497	-0.498563	-0.310086	-1.00822	-0.183566	0.354673	-0.835489	-1.1388
Acox3	1.83156	0.00635098	1.25842	0.683583	2.99873	0.420342	-0.0316842	-0.0509386	-0.0941004	-0.786528	-0.899276	-0.787152	-0.809047	-0.0940945	-0.0336573	-0.911086	-0.890131	-0.0900677	-0.0450719	-0.46591	-0.161363
Qsox1	0.135365	1.27025	1.14537	-0.15783	2.98598	2.8652	1.0252	1.52119	0.488905	-1.83779	-0.899588	-1.90587	-1.9144	-1.46056	-1.64901	-0.994559	-1.71717	-1.77029	-0.30459	-1.40684	-1.57182
Neu1	1.85749	0.0323215	1.26564	0.0209127	2.97382	2.2578	0.118871	0.2606	0.243387	-1.09188	-1.44941	-1.84278	-1.79842	-0.0986355	-0.542686	-0.0775781	-1.15204	-1.08999	0.1207	-1.16657	-0.267993
Sgpp1	1.38473	0.613106	1.40499	-0.0488941	2.97276	1.61366	1.40388	1.19899	0.624345	0.350852	-1.34216	-1.48474	-1.485	-1.13074	-1.37879	-1.50849	-1.82826	-1.37501	-0.735921	-1.6649	-1.671
Pgap1	1.23087	0.0951931	1.58928	0.359965	2.96045	1.67827	0.62493	0.798001	0.166361	-0.94494	-0.782745	-0.960757	-0.921453	-0.620346	-0.615369	-1.04625	-1.1625	-0.61015	-0.245805	-0.627281	-0.9422
Sort1	1.70296	0.665186	1.42341	-0.0867767	2.95456	1.8535	1.28204	0.723639	0.15451	-0.387288	-0.599076	-1.21725	-1.17167	-1.19879	-1.1118	-1.44634	-1.7067	-1.06896	-0.341812	-1.15163	-1.24447
Ramp1	-1.53638	-2.69912	1.00807	0.345783	2.95417	2.44599	1.13677	0.81243	0.321186	-2.16992	-1.97608	-1.77165	-2.14891	-1.60884	-2.05825	-0.708332	-0.017282	-1.24563	-0.771933	-1.19841	-1.85394
Hmgcr	2.19155	-0.17712	0.532784	-0.41986	2.95381	2.84733	1.37824	0.378517	0.773817	-1.0894	-0.0348234	-1.4741	-0.552266	-1.76229	-1.80718	-1.06459	-1.80275	-1.97624	-1.44434	-1.70152	-1.98048
Abcb5	0.118498	-2.1879	1.57191	0.146592	2.95283	2.65126	-0.238953	-0.33522	-0.380783	-1.32424	0.174757	-0.674603	-0.990192	-0.429423	-0.48116	-2.31459	-2.21456	-0.70576	-0.751725	-1.04069	-1.39395
Cldn23	-0.184769	-0.464873	1.4636	-0.19637	2.93455	1.8483	0.284773	0.277397	-0.33958	-0.438391	-0.539791	-0.502765	-0.569652	-0.36321	-0.366548	-0.793069	-1.18737	-0.512084	-0.424393	-0.661257	-0.732361
Atp10b	2.37638	-1.49716	1.0844	0.180759	2.93218	0.0050411	0.174321	0.515652	-0.166573	-0.608902	-0.948645	-0.801629	-0.683365	-0.207362	-0.215585	-0.58346	-0.944984	-0.153011	-0.0189161	-0.452784	-0.263115
Foxred2	-0.182788	-0.458389	0.854485	-0.231362	2.92838	1.51703	0.186952	0.0822782	-0.135591	-0.713826	-0.163458	-0.504911	-0.4228	-0.127538	-0.196164	-0.729683	-0.6948	-0.267496	-0.255963	-0.396167	-0.193407
Pate2	-0.499509	1.58547	1.38036	1.09827	2.9133	0.996922	-0.00210202	-0.0599487	-0.0562105	-1.46114	-1.74586	-1.37475	-1.64805	-0.150775	-0.170165	-2.01594	-2.00136	-0.146393	-0.365801	-0.866623	-0.905783
Slc16a1	0.990788	0.667229	0.290382	-0.50602	2.89274	1.88294	-0.214826	-0.239181	-0.216386	-1.60797	-0.972724	-1.35698	-1.21928	-0.104414	0.388867	0.491838	-0.312479	-0.204525	0.802077	-0.922885	-0.568424
Hdac6	0.205191	0.226382	1.93145	0.605972	2.88965	1.67396	0.956684	0.783621	1.03266	-0.937846	-0.850156	-1.36221	-1.54255	-0.931744	-0.929551	-1.44704	-1.43514	-0.916467	-0.828755	-1.12393	-1.37709
Dnajc10	1.63373	1.02384	1.49293	-0.0958418	2.889	1.83093	0.446263	0.672384	0.382138	-1.72369	-1.12878	-1.87456	-2.04642	-0.788552	-0.324106	-0.868131	-1.49632	-0.571721	0.9239	-1.6691	-2.05025
Npy	0.534255	-1.94611	2.08583	1.35469	2.88853	-0.113382	-0.227799	-0.186128	-0.174896	-1.4774	-2.06303	-1.39979	-1.6628	0.859664	0.0128029	-2.72775	-2.26102	-0.41837	-0.166843	-0.806986	-0.670128
Gpr82	-0.000430671	0.614973	1.64155	0.155259	2.84907	1.53282	0.0512717	-0.0606165	-0.0568571	-1.08245	-1.17138	-0.858593	-0.848233	-0.07898	-0.117828	-1.19601	-1.21414	-0.222378	-0.268945	-0.475339	-0.205464
Wfdc6a	1.32774	-0.148681	1.57179	0.593006	2.84438	2.52177	-0.194848	-0.195639	-0.183883	-1.48489	-1.38021	-1.19058	-1.17365	-0.165362	-0.193529	-1.37768	-1.57669	-0.411836	-0.448422	-0.720141	-0.796865
Ces1d	-0.719601	-1.54473	0.641931	-0.197771	2.80721	2.63815	0.72194	1.09249	0.476296	-1.90609	1.77098	-0.247913	-0.329828	-1.30315	-1.27861	-2.24961	-2.33464	-1.59401	-1.53005	-1.25006	-1.67021
Sulf2	-0.0954574	-0.0341027	0.469933	0.226585	2.76687	0.924637	-0.513625	-0.537237	-0.329153	-0.633165	-0.645904	-0.758777	-0.814392	0.409923	0.106096	0.0338999	-0.39391	0.602731	1.28093	-0.465019	-0.389774
Suox	1.59679	0.465692	1.45894	0.465749	2.7585	1.99338	0.327964	0.409627	0.33383	-1.07118	-0.875953	-1.17603	-1.2371	-0.54795	-0.3287	-0.46545	-1.02701	-0.405124	0.0925521	-0.96196	-1.08189
Spint3	1.00905	-1.04389	1.73978	1.54832	2.75841	1.93873	-0.590466	0.151813	0.0215333	-2.23677	-1.64827	-1.87088	-1.98685	-0.611089	-0.68273	-1.59839	-2.63049	-0.926875	-0.386272	-1.18892	-0.923944
Enpp5	1.63465	1.36959	1.09288	-0.35243	2.74467	1.60819	0.00819497	0.29299	0.189553	0.460132	-1.11672	-1.58586	-1.29961	-0.252165	-0.166862	-0.299979	-1.21636	-0.379135	0.0499707	-1.29331	-1.0401
Kdsr	0.428638	0.00874665	1.46337	-0.38147	2.72882	2.67954	0.430593	0.853415	0.0707075	-1.00841	0.0492381	-1.34533	-1.09833	-0.404016	-0.291378	-0.381662	-1.11579	-1.13449	0.0688834	-0.75381	-1.28674
Fam69a	-0.289246	-0.888182	1.22942	-0.229263	2.69106	-0.102098	-0.744042	-0.599111	-0.125239	-0.545411	0.278501	-0.234025	-0.106278	0.041872	-0.112807	-0.248572	-0.391069	0.578948	1.22321	-0.206458	-0.753366
Uggt1	0.722313	0.744786	1.29856	-0.0328361	2.68877	1.50189	0.654528	0.72426	-0.323337	0.141372	-0.158092	-0.991869	-1.00674	-0.564797	-0.463441	-0.180599	-1.12242	-0.832542	-0.240971	-0.66521	-1.32241
Lman2	1.70306	1.38198	1.29083	-0.0890789	2.68728	1.70685	0.507808	0.838439	0.333167	-1.00538	0.172566	-1.152	-1.15794	-0.459406	-0.597359	-0.410534	-1.55741	-1.25068	-0.0752095	-1.05239	-0.168055
Slc38a4	-0.130846	0.0490987	0.829294	0.118195	2.68242	1.72516	0.0272329	-0.0352047	-0.17152	-0.830202	0.036897	-0.560873	-0.662511	0.218268	-0.0184117	-0.463668	-0.890686	-0.344886	-0.0900822	-0.312762	-0.553642
Hexb	-0.369252	1.53736	0.999822	-1.46492	2.67006	0.412343	-0.177784	-0.0620913	-0.0910605	1.21629	0.169461	-1.55321	-1.38224	0.675559	0.351971	-0.566728	-2.23529	-1.34711	-1.07067	-1.44856	1.34865
Npc2	1.11605	1.63549	1.52493	0.385486	2.6458	1.20793	-0.12568	-0.144941	-0.26568	-1.11954	-2.49102	-2.03344	-2.17444	-0.271951	-0.130042	-1.61563	-2.70988	-2.69505	-2.0418	-0.955502	2.00919
Ldlr	1.43258	-0.819366	0.558777	-0.486886	2.625	0.593737	0.605664	-0.0675621	-0.261836	-0.316056	0.747682	-0.236169	-0.28098	-0.702868	-0.873469	-0.627141	-0.69446	-0.546217	-0.105786	-0.848057	0.306528
Erlin2	0.206812	0.0423235	0.82549	-0.191624	2.6237	0.800312	0.0490396	0.210658	-0.281132	0.108729	0.110997	-0.305689	-0.279137	-0.243296	-0.288918	-0.340766	-0.613239	-0.0483489	0.544912	-0.509392	-0.10496
Cd97	-0.418097	1.90922	1.39597	-0.116445	2.61739	2.08237	0.225848	0.744529	-0.00327427	-1.2451	-1.21489	-1.33127	-1.39213	-0.7478	-0.940528	-1.09549	-1.31995	-0.326877	1.23652	-0.415281	-0.104822
Defb37	0.605648	0.213729	2.10111	1.55386	2.59454	0.832962	-0.174249	-0.0525165	-0.109766	-1.72129	-2.35735	-1.56805	-1.86219	-0.270777	-0.160038	-1.37981	-2.36927	-0.290855	-0.462017	-0.777106	-0.746277
Prlr	0.212106	-0.136709	1.23216	0.13974	2.58747	1.85052	1.76444	1.30546	0.502017	-1.13153	-1.10591	-1.36599	-1.52531	-1.26077	-1.77272	-0.490961	-1.00529	-2.02948	-1.62576	-1.31639	-1.77451
Abca3	0.542199	0.372433	1.26927	0.166284	2.57748	2.16492	1.04067	0.906006	-0.467377	0.510799	-0.106413	-1.11236	-1.19953	-1.29442	-1.04463	-1.54253	-1.72068	-1.28627	-0.801645	-0.716486	-1.35137
Cldn3	1.48527	2.32673	0.629472	-0.44847	2.57036	2.29959	1.46404	1.52924	0.909189	-0.433197	-1.03246	-1.81445	-1.49816	-2.91672	-2.80786	-3.50384	-3.48124	-2.94042	-2.48069	-3.23226	-2.4867
Slc22a5	0.0803741	-0.665543	0.655297	0.100822	2.55396	1.14136	-0.287456	-0.0566915	-0.427255	-0.842615	-0.656551	-0.739651	-0.679934	-0.263574	-0.00950983	0.172231	-0.0392293	0.209463	1.00908	-0.233267	-0.578993
Fam189a2	-0.00515327	-0.36695	1.05162	0.265449	2.54232	1.47166	0.188672	0.0681229	0.00415563	2.01083	-0.94799	-1.10669	-0.942882	-1.17447	-0.229891	-1.1052	-1.48978	-0.677066	-0.220355	-0.688318	-1.48458
Manba	0.186219	0.0897797	0.382449	0.0276837	2.53824	0.160804	0.0913285	0.0972403	0.210016	-0.216429	-0.348121	-0.316151	-0.231723	0.0436756	-0.143349	-0.0620243	-0.314291	-0.0875141	-0.153323	-0.177016	-0.096646
Ctsh	0.650421	-0.506638	1.15706	-0.0983908	2.52127	0.606579	0.820875	0.998939	0.737899	-0.995702	0.639416	-0.760333	-0.620908	1.00767	-1.03462	0.144628	-1.19103	-1.32318	-1.25872	-0.358592	1.2583
Srebf1	1.07388	0.889618	0.868318	0.638654	2.51831	1.41302	0.339137	0.361162	0.386039	-0.362632	0.148562	-0.526604	-0.703927	-0.229705	-0.414976	-0.647459	-0.90706	-0.854667	-0.493874	-0.77576	-0.531757
Tmed6	0.66842	0.270733	1.79038	0.838721	2.51559	1.58998	0.333984	0.582864	-0.234733	-1.00104	-0.684193	-1.03058	-1.21305	-0.395213	-0.453056	-1.21163	-1.35939	-0.497414	-0.496593	-0.693319	-0.829127
Grn	1.08037	0.148025	0.645071	-0.40283	2.51185	1.64026	-0.202247	0.0727345	-0.172227	-0.0631638	0.509082	-1.00587	-0.949312	0.288251	-0.418155	0.4051	-0.661017	-0.801953	0.352047	-0.758003	1.44951
Ctsc	0.915955	0.974194	0.726892	-0.00575136	2.51161	1.29023	0.0022668	0.13091	-0.355063	-0.784437	-0.0318846	-1.02485	-1.20565	0.963577	-0.0392907	-0.258356	-0.860211	-1.03171	-1.12282	-0.525624	1.635
Slc44a4	0.981589	-0.384448	0.982734	0.428249	2.50911	1.48479	0.170032	0.270494	-0.156685	-0.437398	-0.649107	-0.685024	-0.543516	-0.21019	-0.218607	-0.557786	-0.788395	-0.2897	-0.0753008	-0.401676	-0.35413
Abhd12	0.807524	0.371532	1.393	0.338911	2.4883	1.71956	0.978282	1.14858	0.731946	-0.615625	0.219612	-0.743963	-0.849916	-0.682903	-0.734075	-0.682558	-1.1765	-1.12696	-1.01569	-1.00997	0.00237979
Cyp2j13	0.187418	-0.223354	0.87821	-0.131591	2.48751	1.58712	-0.0359585	-0.0896445	-0.0841231	-0.679034	-0.388348	-0.469879	-0.525636	-0.134421	-0.134436	-0.709395	-0.623016	-0.217504	-0.0355058	-0.217136	-0.374052
Ssr2	0.829601	0.72836	0.777473	-0.293244	2.48622	1.79425	0.223107	0.283505	0.220833	-1.26571	0.369401	-0.77695	-0.70155	-0.225583	-0.206247	0.406651	-0.40288	-0.927722	-0.22999	-0.244886	-1.21542
Fga	2.21346	-0.848065	0.723304	-0.734047	2.47156	2.14953	-0.0907721	-0.130577	-0.122534	-1.08932	-0.946951	-0.905445	-0.83757	0.292799	-0.0581003	-0.561826	-0.941207	-0.289848	-0.318062	-0.615458	-0.533372
Cpd	-0.00766338	-0.398708	0.837529	-0.418738	2.45739	0.799746	-0.174667	-0.201004	-0.257038	0.0854886	0.581963	-0.49145	-0.62302	0.00762506	0.462957	0.224974	-0.470467	-0.676919	-0.0791381	0.417579	0.299288
Cers4	-0.25036	-0.173166	1.28383	-0.174867	2.45257	1.14196	-0.440312	-0.40299	-0.380293	0.0925514	-0.902033	-0.846519	-0.989271	0.118523	0.0897748	-0.33399	-0.173352	-0.0380795	-0.157576	0.313948	-0.522323
Atp13a4	0.925575	-0.5857	1.31033	0.183092	2.41822	1.92136	-0.0233234	-0.117516	-0.110356	-0.95549	-0.404928	-0.611263	-0.601245	-0.173087	-0.135438	-0.736853	-0.852778	-0.298588	-0.325324	-0.307986	-0.406067
Tgoln1	0.602684	0.133261	0.802151	-0.577722	2.40222	1.68109	-0.571114	-0.627352	-0.996329	-0.269277	0.609336	-0.760232	-0.828276	0.445919	0.252173	0.250008	-0.642378	-0.696516	0.338216	0.101046	0.0342993
Cisd1	1.73559	0.16199	1.79003	0.245327	2.39157	1.7813	1.36641	1.19862	0.64065	-0.149583	-1.07363	-1.6627	-1.94183	-1.68349	-1.70126	-1.00325	-1.35762	0.139289	-0.345172	-1.62676	-2.14702
Ostm1	0.589963	-0.170715	0.526272	-0.110771	2.38863	0.625784	-0.0462404	-0.130645	0.098536	0.307508	-0.314821	-0.39389	-0.493061	-0.207202	-0.456925	-0.195603	-0.334439	0.384687	0.990117	-0.428169	-0.183102
Fdft1	1.76769	0.678924	0.990483	0.526386	2.37923	2.05505	1.42433	0.580661	0.340135	-0.260149	-0.166884	-0.816316	-1.00191	-1.26547	-1.69799	-1.43593	-1.63478	-1.61234	-1.36652	-1.48334	-1.57835
Alppl2	0.124458	0.420982	0.95902	0.101366	2.37556	1.65748	0.42336	0.147086	-0.204306	-0.76562	-0.578219	-0.514361	-0.604642	-0.255049	-0.266175	-0.569879	-0.757417	-0.337162	-0.35026	-0.362124	-0.394018
Spg7	0.843907	0.478021	0.950826	0.664211	2.37182	2.05285	0.239911	0.356054	0.282786	-0.444492	-0.529769	-0.971323	-1.01661	-0.349026	-0.484828	-0.692883	-0.671868	-0.144317	0.168494	-0.609047	-1.25416
Defb40	-0.117413	-1.35059	2.12703	1.62693	2.368	1.95153	-0.364739	0.0894103	-0.710871	-1.45678	-1.29503	-1.61885	-1.76461	-0.690168	-0.763355	-1.86019	-2.11247	-0.888384	-0.841596	-1.03326	-1.46059
Alg5	0.347512	0.407598	0.753286	-0.212614	2.36157	1.85678	0.341265	0.571015	0.41875	-0.495537	0.352276	-0.636509	-0.780138	-0.314853	-0.265199	-0.144105	-0.57741	-0.356597	-0.00754973	-0.36127	-0.486222
Tapbp	-0.446978	0.63703	0.726983	-0.390029	2.35708	1.9413	-0.0739145	-0.188265	-0.267651	-0.191551	0.781019	-0.538126	-0.749219	0.858471	-0.223139	0.131293	-0.951748	-1.27286	0.00882237	-0.172907	-0.224017
Srpr	1.10617	0.760776	0.56905	-0.170119	2.34323	1.64012	0.0211611	0.404017	-0.783826	-0.867452	0.502407	-0.517051	-0.381238	0.0215735	-0.108854	0.339592	-0.606194	-0.719462	-0.0435063	-0.605369	-0.917505
Ramp3	-0.735499	1.31915	1.03878	-0.623054	2.3423	0.517765	-0.215222	-0.365976	-0.69449	-0.61257	-1.58884	-1.15401	-1.32538	1.10235	0.0274546	0.384943	-0.563217	-1.70669	-1.45332	0.529604	0.565013
Fuca1	0.227423	-0.0967924	1.40282	0.0815179	2.33918	1.15493	0.148587	0.316769	-0.0989584	-0.287293	0.0054723	-0.806181	-1.38459	1.56235	0.41322	0.840226	-0.894329	-1.61875	-1.20736	-1.05002	-0.262262
Edem2	0.85965	0.818872	1.33387	0.477397	2.3319	0.969761	0.651476	1.05516	0.313192	-0.348182	0.0676777	-0.690532	-0.772198	-0.557887	-0.666354	-0.492391	-0.916435	-0.607799	-0.195025	-0.413379	-0.406546
Clcn7	0.597476	-0.430661	0.994361	0.446907	2.32719	0.759989	0.115858	0.120029	-0.0212074	0.104141	0.00699084	-0.421689	-0.493156	-0.245803	-0.159539	-0.461561	-0.613194	-0.127118	0.0472702	-0.31438	-0.0808216
Aqp9	0.579474	0.140563	1.09828	0.0869312	2.32338	1.70937	0.847753	0.943104	-0.587665	-0.739508	-0.190126	-0.702742	-0.635616	-0.726829	-0.648884	-0.427203	-0.780667	-0.708156	-0.608439	-0.679278	-0.50175
Atp2b3	0.0325337	0.211998	1.11749	0.25456	2.32311	1.46075	-0.0698799	-0.0529928	-0.0665734	-0.497583	-0.661254	-0.480459	-0.566238	-0.115415	-0.0928972	-0.545049	-0.672833	-0.116601	-0.195742	-0.276826	-0.380088
Rnase11	0.123052	-0.193636	1.48264	0.106421	2.32161	1.26512	-0.0421404	0.00907359	-0.0392598	-0.337585	-0.74093	-0.552547	-0.643627	-0.00932855	-0.0904473	-0.685023	-0.688137	-0.14132	-0.161432	-0.301529	-0.310297
Uxs1	0.547737	0.558502	1.00096	0.0569385	2.30513	1.20116	0.334959	0.270502	0.275831	-0.491943	0.00701206	-0.646775	-0.774737	-0.127987	-0.029098	-0.143737	-0.455424	-0.126831	0.904559	-0.50688	-0.69122
Cd52	1.18736	0.0644475	2.11592	1.04642	2.30503	2.05783	1.94832	1.37549	0.389421	-2.7236	-3.81358	-4.66016	-4.80855	-5.40161	-6.30627	-4.22954	-5.12379	-5.43769	-4.31407	-2.87799	-2.10761
Phgdh	1.1056	0.634195	2.29275	1.11705	2.29559	1.22846	0.23528	0.237378	0.268416	-1.23828	-1.14619	-0.841655	-1.33698	-0.662551	-0.566771	-1.57225	-1.44573	-0.523416	-0.440866	-1.10501	-1.03725
Fasn	1.01763	0.930991	1.14741	0.617441	2.28927	1.46526	0.885215	0.281497	0.0236451	0.166352	-0.986899	-1.00778	-1.12191	-0.795714	-0.576011	-0.510899	-0.974911	-1.01887	-0.0231827	-1.06058	-1.22049
Ggta1	-0.600659	-0.987991	1.13496	0.0983924	2.28107	1.30312	-0.516761	-0.435907	-0.411867	-1.04802	0.125619	-0.577095	-0.407953	0.367391	-0.145975	-0.0783994	-0.446962	-0.581375	-0.598451	0.409342	1.63757
Atraid	0.202446	0.548473	1.13799	0.108053	2.28082	1.76524	0.168107	0.445538	-0.0912628	-0.786741	0.178027	-0.820158	-0.904717	0.216391	0.339366	0.0600322	-0.482963	-0.479769	-0.0609941	-0.477947	-0.68966
Slc35b4	0.246326	-0.158194	0.889845	0.182086	2.26213	0.784218	0.226088	0.354956	0.201391	-0.166139	-0.193341	-0.548448	-0.513686	-0.438299	-0.482037	-0.631036	-0.299641	0.449801	1.06582	-0.483207	-0.444018
Slc52a3	-0.12037	-0.38567	0.935848	0.327928	2.26026	1.69632	-0.0649199	0.0201868	-0.0911368	-0.51083	-0.397436	-0.375666	-0.436868	-0.141786	-0.143138	-0.691623	-0.63303	-0.240131	-0.274106	-0.153756	-0.308
Frk	0.622065	0.213172	1.12863	0.29035	2.25569	1.54167	1.18971	0.777007	-0.239263	-0.117374	0.334999	-0.423547	-0.660751	-1.13808	-0.861656	-0.815995	-1.04218	-1.1785	-0.992062	-0.882887	-1.13846
Cad	1.77654	0.975962	1.94816	1.25268	2.24825	2.13442	0.139242	-0.230667	-0.874484	-2.06257	-1.99734	-1.54204	-1.67669	-0.771402	-0.872453	-2.19891	-2.43402	-0.885078	-0.702195	-1.68792	-1.64756
Dpp4	1.2197	0.893532	0.89219	0.112569	2.24627	1.91989	0.767906	0.526303	0.572016	0.0631508	-0.524905	-0.942368	-0.913489	-0.479085	-0.659535	-0.686928	-1.09601	-0.767229	-0.768928	-0.800417	-0.465942
Elovl6	1.62441	0.136924	0.968083	-0.17915	2.23929	0.923578	-0.262905	-0.085809	-0.405683	0.928997	-0.443758	-0.737455	-0.544989	0.383214	0.167439	-0.112203	-0.593203	-0.892538	-0.993573	-0.783799	-1.35289
Secisbp2l	0.166719	0.142468	1.45735	0.248813	2.23557	1.17644	-0.0105576	-0.0677144	0.337389	-0.321039	-0.335318	-0.655897	-0.619484	0.485313	-0.187085	-0.293948	-0.422898	-0.385307	0.506734	-0.413408	-0.688303
Spint2	1.28581	1.29805	0.663045	0.303621	2.21844	2.10231	1.70259	1.53508	0.0597746	-0.224469	0.0992777	-0.984475	-0.999052	-3.02902	-3.02535	-3.2727	-2.95361	-3.09902	-2.97722	-2.25954	-3.2244
Canx	0.700744	0.44875	1.0406	-0.144537	2.21417	1.22575	0.217625	0.223432	0.109518	-0.501992	0.450904	-1.1067	-1.065	-0.970967	-0.185756	-0.0417978	-0.684146	0.27001	0.878316	-0.899215	-0.84905
Sqle	1.23273	0.0621108	0.914063	0.228799	2.21384	1.89299	1.15559	0.509217	0.221288	-0.739182	0.0159647	-0.545971	-0.627425	-0.658704	-1.40749	-0.795822	-0.947593	-1.32709	-0.44717	-1.33739	-1.10681
Pla2g12a	1.29786	0.857674	1.71066	0.936559	2.21285	1.49635	0.868869	0.463914	0.104692	-0.90829	-0.628003	-1.19866	-1.15808	-0.437545	-0.504099	-0.670389	-0.933725	-0.707923	-0.49958	-0.75394	-0.773426
Ermp1	0.32942	-0.445902	1.12055	-0.26389	2.20585	-0.00895577	0.0721942	0.114403	-0.158363	0.669932	-0.389069	-0.506692	-0.412902	-0.3163	0.159269	-0.0996256	-0.375183	-0.143635	0.333161	-0.173112	-0.422922
Tm9sf2	0.879519	0.265595	0.991624	-0.446065	2.20021	1.48539	0.399142	0.303475	0.0241512	-0.162914	0.267714	-0.940828	-0.907105	0.00857913	-0.122152	0.210301	-0.500861	-0.413137	0.792013	-0.591563	-0.810406
Plin5	0.328768	-0.685925	1.1691	0.285624	2.19213	0.442207	-0.000946455	-0.0385765	-0.0361596	-0.266078	-0.421183	-0.315315	-0.403688	-0.0649839	-0.0666239	-0.528182	-0.426084	-0.0678179	-0.0803785	-0.19481	-0.218409
Ncstn	0.310916	0.580848	0.587704	0.430982	2.18716	1.15475	-0.100182	0.0416839	0.112308	0.0207445	0.0362909	-0.458617	-0.33067	0.208285	0.0615859	0.081477	-0.584561	-0.302518	-0.223599	-0.079387	-0.288998
C1galt1c1	0.442046	0.779511	0.247696	-0.214476	2.185	1.13761	0.334988	0.27307	-0.38317	-0.349768	-0.0470553	-0.387023	-0.397274	-0.0161157	-0.139427	-0.063658	-0.473405	-0.310495	0.306624	-0.378771	-0.309517
Abcc3	0.113367	0.679047	0.698765	-0.148484	2.16724	0.989016	0.149702	0.0896739	-0.289799	0.170729	-0.0384044	-0.269686	-0.33176	-0.0370698	-0.307904	-0.416057	-0.562489	-0.232025	-0.155598	-0.259584	-0.184893
Gdf15	0.908658	-1.66888	0.0522827	-0.36908	2.15982	0.870926	-0.4204	-0.21132	-0.0668565	-0.128448	1.32198	0.0312545	0.189023	-0.271002	-0.374153	-0.688696	-1.30715	-0.842148	-0.762675	-0.427395	2.01516
Nucb1	0.546008	0.870339	0.587996	-0.0344912	2.15746	1.88907	0.400121	0.835717	0.452151	-0.433391	0.923085	-0.623208	-0.546499	0.154119	-0.56714	-0.177559	-0.927639	-1.21759	-0.653236	-0.514582	-0.995535
Hspa1b	-0.857009	-0.215418	1.39475	0.838048	2.15475	0.103672	-0.948525	-0.510372	-0.810348	0.608054	-0.30882	-0.502399	-0.90543	-0.183441	0.153254	-0.424488	-0.940457	0.00864589	0.744898	0.825052	0.703885
Chrd	-0.470641	-0.673601	0.674746	-0.439667	2.14746	-0.378714	-0.303778	-0.228157	-0.237943	-0.539033	-0.15668	-0.489868	-0.558891	0.301627	0.224591	0.413935	0.436007	-0.0368507	0.500229	-0.410267	-0.401389
Aga	0.326271	0.140842	0.597864	-0.036051	2.14324	1.1423	-0.135228	0.333617	-0.00136984	-0.47419	0.202345	-0.736125	-0.769345	0.530555	0.311617	0.797938	-0.0790856	-0.441264	0.152745	-0.414037	-0.645853
Ncam1	-0.574722	0.222028	0.538331	-0.212272	2.12804	1.66273	0.649635	0.311534	0.957679	-1.44788	1.30386	0.125295	0.896203	-0.81046	-0.887825	-0.439981	-1.04111	-1.50149	-0.898984	-1.37139	-1.78793
Slc46a2	0.00961019	1.01724	1.15871	0.661806	2.12617	0.682777	-0.0415202	0.0493309	-0.0238223	-0.543962	-0.654741	-0.41077	-0.468935	-0.0619765	-0.0135818	-0.582603	-0.583205	-0.105481	-0.0219499	-0.259235	-0.29125
Egf	-0.00925227	0.095784	1.17221	0.406775	2.12573	0.892204	0.285356	0.738012	-0.250285	-0.365992	-0.591453	-0.484925	-0.497146	-0.284246	-0.303302	-0.151881	-0.565692	-0.305871	-0.314576	-0.310546	-0.41482
Erp29	0.830619	0.827506	1.06976	0.0429439	2.11661	1.68234	0.306031	0.326061	0.08682	-0.83944	-0.101006	-0.679632	-0.607497	-0.134358	-0.32801	-0.102698	-0.669728	-0.289135	-0.149884	-0.81822	0.115354
Mthfd1l	0.0368551	-0.0871113	1.68146	0.347384	2.11339	1.40585	0.349603	0.0089055	0.420457	-0.515942	-0.00239817	-0.597019	-0.604215	-0.153049	-0.0627976	-0.596725	-0.712016	-0.476044	-0.291122	-0.347921	-0.387505
Clptm1l	0.66603	0.326698	0.941806	0.296925	2.1119	1.10949	0.41277	0.338864	0.119872	0.112175	0.292339	-0.624014	-0.72022	-0.281812	-0.0959159	-0.215372	-0.460612	-0.507704	-0.22261	-0.413874	-0.232663
Parm1	-0.456311	-0.170848	0.0890824	-0.447547	2.10692	-0.287709	-0.308636	-0.051245	-0.303669	0.915254	-0.535817	-0.395741	-0.235342	-0.109828	-0.175185	0.396749	0.274003	-0.0565795	0.0429585	-0.368277	-0.438491
Hspa1a	-1.26356	-0.415121	1.38842	0.583617	2.10158	-0.179726	-2.16046	-1.13793	-1.28363	0.182103	-0.668614	-0.862283	-0.995935	0.955013	0.0879856	0.314944	-0.213061	-1.89019	-0.0805966	1.16994	1.4592
Zfyve21	0.902886	0.835696	1.87237	0.718184	2.09906	0.873384	0.970119	1.15404	0.403116	-0.47582	-0.873508	-0.970117	-1.02472	-1.04123	-0.700194	-0.204754	-0.778918	-1.09926	-0.447227	-0.94854	-0.859982
Trank1	1.36872	1.12872	1.08947	-0.113803	2.08963	0.126426	0.0943201	0.118617	-0.0842842	-0.21296	-0.0991065	-0.564644	-0.583447	-0.0107434	-0.0934152	-0.675645	-0.762081	-0.114467	-0.128696	-0.382586	-0.312201
Kcnk5	0.992511	0.740538	0.685501	0.193979	2.08113	1.94552	0.624968	0.0312454	0.213947	-0.899209	-0.069215	-0.784824	-0.511514	0.379612	-0.534422	-0.323572	-0.769449	-0.940904	-1.01799	-0.451291	-1.03875
Tmem50b	0.49016	0.517281	1.32261	0.203043	2.06971	0.933356	0.658162	0.240783	0.498942	0.1706	-0.2258	-0.687075	-0.5045	-0.567274	-0.350921	-0.524002	-0.692164	-0.415079	0.119465	-0.483657	-0.0782731
Lgr4	0.225129	0.200719	0.655841	0.102168	2.05659	1.1719	-0.306939	-0.501441	0.324886	0.0796464	1.12532	-0.216444	0.950971	-0.664363	-1.00598	-0.430514	-0.914039	-0.0959363	1.08576	-0.840701	-1.22899
Fam84a	1.96727	0.302497	1.2096	0.539198	2.05215	0.639109	-0.0308687	0.0165744	-0.0925803	-0.316502	-0.55034	-0.641927	-0.359704	-0.144366	-0.0814417	-0.647521	-0.910935	-0.166985	-0.214579	-0.53367	-0.427975
Tvp23b	0.814344	1.02562	0.818377	0.200327	2.05022	1.45294	0.745246	0.757581	0.634291	-0.287364	0.151074	-0.571013	-0.922655	-0.248003	-0.239069	0.102309	-0.740195	-1.26968	-1.21335	-0.642745	-0.793229
Tecr	0.344966	1.60032	1.64707	0.351054	2.0458	1.54472	0.490222	0.549906	0.24271	-0.693634	-0.581794	-1.43332	-1.25356	-0.529153	-0.426926	-0.195571	-0.933585	0.105697	0.485809	-0.881333	-1.65926
Erbb2	0.448795	0.0318344	0.88891	0.375047	2.04483	1.18213	0.552381	0.336274	0.118841	-0.0674466	-0.101086	-0.490398	-0.38056	-0.341296	-0.249614	-0.611669	-0.59672	-0.439084	-0.414628	-0.436116	-0.487592
Clcn3	0.480289	0.371904	1.06063	0.180068	2.04209	1.35185	0.569563	0.791669	-0.712911	0.419156	0.459169	-0.390011	-0.274241	-1.09353	-0.948808	-0.548218	-1.1842	-0.224547	0.291975	-0.553604	-1.03921
Prkcsh	0.658989	0.526418	0.840403	0.127581	2.03913	1.86815	0.36365	1.07188	1.10581	-0.0727928	0.90304	-0.683818	-0.824065	-0.437379	-0.669984	0.191835	-0.913785	-0.932479	-0.804183	-0.645231	-0.938687
Lyzl4	0.0679428	-0.230762	1.32818	0.631618	2.03812	0.511587	0.0611631	-0.0391646	-0.036718	-0.464689	-0.480768	-0.343087	-0.444037	-0.0736369	-0.023252	-0.271712	-0.504642	-0.118841	-0.109666	-0.186754	-0.21484
Prrg1	2.02687	0.168093	0.939169	-0.0398427	2.03445	0.724441	-0.0309477	0.0150796	0.250601	-0.505396	-0.222461	-0.664999	-0.492945	-0.0735246	0.24412	-0.171058	-0.784259	-0.127088	-0.200679	-0.196625	-0.275058
Sidt2	0.863794	0.306022	1.15025	0.771331	2.0344	1.13625	-0.113935	-0.0570198	-0.442735	-0.0430172	0.053589	-0.583377	-0.327819	-0.0306419	-0.119724	-0.526404	-0.584604	-0.178883	-0.134796	-0.173777	-0.598171
Nxpe3	0.256208	0.486903	1.40805	0.672663	2.02685	1.13853	1.02232	0.688929	0.338597	-0.461135	-0.431546	-0.688269	-0.429928	-0.726471	-0.712981	-0.317912	-0.631977	-0.71583	-0.415455	-0.644864	-0.799251
Comtd1	1.60084	-0.0575372	1.1225	0.827759	2.02667	1.00247	0.480763	0.577084	0.744281	-0.333533	-0.217672	-0.629077	-0.502655	-0.630694	-0.494197	-0.487649	-0.708661	-0.270865	-0.186707	-0.649974	-0.176981
Apmap	0.70165	0.0412253	0.684219	-0.28782	2.01411	0.426782	-0.159439	-0.0117863	0.192102	-0.0299439	0.480834	-0.465201	-0.486418	0.137	-0.195394	0.205059	-0.281981	0.00465928	1.08379	-0.105392	-0.355984
Grhpr	0.00904069	0.576259	1.76372	0.653915	2.00245	0.813116	0.399876	0.259381	0.466334	-0.184966	-0.343745	-0.524072	-0.649838	-0.400286	-0.287088	-0.745186	-0.733115	-0.0848992	0.161706	-0.619669	-0.487782
Dopey2	0.816614	-0.196455	1.13284	0.944203	1.99494	0.997541	0.431055	0.304581	0.715075	-0.15174	0.317973	-0.399547	-0.369795	-0.114072	-0.509328	-0.738347	-0.881603	-0.666523	-0.281616	-0.232361	-0.540876
Edem3	0.518208	0.155742	0.567905	-0.100413	1.99363	0.837585	-0.357416	-0.21885	-0.578563	-0.295415	0.238048	-0.330749	-0.307243	0.1105	0.257273	0.150881	-0.26797	-0.00174475	0.727221	-0.219794	-0.574505
Llgl2	0.435072	0.233448	0.757495	0.602507	1.99099	1.05108	0.378382	0.288168	0.198087	0.590518	0.104794	-0.398175	-0.402464	-0.302588	-0.452507	-0.679056	-0.761026	-0.527269	-0.287409	-0.470094	-0.592542
Tmem30b	0.779492	0.913647	1.06655	-0.423708	1.9883	1.84761	1.03709	1.11501	0.320619	0.694594	-0.153085	-0.892635	-0.90758	-1.08919	-1.06115	-1.05773	-1.11916	-1.03846	-0.969252	-0.954953	-0.733109
Cutal	0.120362	-0.0047038	0.879133	0.107585	1.98724	0.840095	0.885601	0.766878	0.60518	-0.10865	-0.173433	-0.398749	-0.407685	-0.633074	-0.659396	-0.17773	-0.479093	-0.60518	-0.532752	-0.317267	-0.442344
Vimp	0.419919	0.513795	0.805536	-0.108144	1.98404	1.79577	-0.0798239	0.476081	0.178528	-1.28093	0.583671	-0.491576	-0.811626	0.105747	0.259357	0.514416	-0.632721	-1.16367	-0.430177	-1.44652	-0.455075
Ssr1	1.14797	0.8189	0.727802	-0.0329875	1.98391	1.88903	-0.0865017	-0.0494874	0.399881	-0.63925	0.811431	-0.598523	-0.794222	-0.0122317	0.0234739	-0.0388325	-0.805023	-0.559455	0.059152	-0.546245	-0.610222
Slc26a2	0.92664	0.264063	0.773436	0.521132	1.97701	1.07717	0.244026	0.266604	0.170078	-0.149298	-0.343509	-0.478778	-0.40912	-0.267011	-0.221237	-0.493163	-0.523162	-0.395221	-0.342651	-0.404219	-0.185609
Fam120a	0.582981	0.216889	0.93552	0.0574987	1.97658	0.848984	-0.00531231	-0.120205	0.0871069	-0.166578	0.176546	-0.553636	-0.195644	-0.356335	0.00272516	-0.0748296	-0.365394	0.120734	1.15137	-0.45457	-0.733014
Lclat1	0.534715	0.423546	0.501895	0.0631494	1.97379	0.524121	-0.0191009	-0.133405	-0.333813	0.324252	-0.297668	-0.416227	-0.441148	-0.0929696	-0.121104	-0.217109	-0.382632	0.312668	0.704435	-0.42395	-0.243631
Man2a2	-0.642276	-0.703751	1.19293	0.413168	1.97209	1.2174	0.414513	0.173775	-0.201495	-0.206571	0.634748	-0.293727	-0.463551	-0.297543	-0.220127	-0.470756	-0.464305	-0.446609	-0.102685	-0.498649	-0.525498
Abcd3	0.548071	0.596743	1.00069	0.114449	1.97198	1.22364	0.835832	0.624119	0.0440491	0.0725246	-0.42251	-0.547732	-0.594685	-0.86334	-0.543936	-0.68122	-0.56441	-0.392003	-0.0350084	-0.691672	-0.855547
B3galt2	-0.0264982	-0.499455	1.4047	0.125687	1.96772	0.768335	-0.028267	-0.0134755	-0.0126204	-0.462933	-0.559534	-0.358163	-0.298517	-0.053086	-0.00614928	-0.615704	-0.510942	-0.0929219	-0.104912	-0.117485	-0.257246
St6galnac2	1.42398	-0.155036	0.753001	0.480231	1.96351	1.01228	0.228449	0.53787	-0.0119318	0.0704822	-0.32527	-0.45798	-0.43892	-0.173113	-0.293043	-0.313891	-0.789508	-0.476147	-0.383662	-0.379522	-0.566429
Slc25a29	0.601287	0.741247	1.16565	0.608825	1.95631	1.39305	0.452423	0.750841	0.536553	-0.642605	-0.644301	-0.63866	-0.588042	-0.381468	-0.350095	-0.4216	-0.610111	-0.300506	-0.374637	-0.596142	-0.442079
Ganab	0.589774	0.0497592	0.381253	-0.152607	1.95322	0.931685	0.380511	0.435846	-0.601774	0.279992	0.370475	-0.385264	-0.45418	0.0660127	-0.0111621	0.0490152	-0.523493	-0.663854	-0.179503	-0.393191	-0.55976
Arl6ip1	0.225645	-0.180442	0.974532	-0.168944	1.94635	1.26747	0.409054	0.564835	0.361685	0.892163	0.619984	-0.996287	-0.81395	-0.881122	-0.330741	-0.107306	-0.833756	-0.984423	-0.0839652	0.182699	0.131695
Igf2r	0.274761	-0.217401	-0.0738921	-0.604743	1.9461	0.805107	-0.496186	-0.609453	0.606644	0.0941114	0.689455	-0.639348	-0.350543	0.302325	-0.328449	0.269511	-0.264172	0.341378	1.87576	0.0512033	-0.825884
Slc2a3	0.418585	-0.626229	0.226471	0.0939559	1.94598	1.42573	0.126299	0.251026	-0.242923	-0.901118	-0.794765	-0.819177	-0.905386	-0.248705	0.0348591	0.663755	0.253584	-0.703984	-0.0151063	-0.529085	-0.558887
AI464131	0.0841018	-0.257438	0.700395	0.0220817	1.94451	0.23823	-0.0392859	-0.0350452	0.126608	-0.0940651	-0.364618	-0.221657	-0.291222	0.031223	-0.0737802	-0.147569	-0.296262	0.221244	0.235012	-0.191974	-0.186779
Slc34a2	1.23316	0.46386	1.0797	-0.16912	1.94424	0.733269	0.649851	0.197132	0.793305	-0.427117	-0.504686	-0.601087	-0.588645	-0.434367	-0.426288	-0.66237	-0.732621	-0.402181	-0.38843	-0.372418	-0.439091
Tox3	1.05132	1.48662	1.05624	1.05846	1.94311	1.12329	0.558563	0.851036	0.145299	-0.76274	-0.518524	-0.863375	-0.87772	-0.186748	-0.307037	-0.645519	-0.962866	-0.853393	-0.856704	-0.667199	-0.712575
Galnt3	-0.523091	-1.29692	0.633073	0.209325	1.94114	0.904612	0.221626	0.0528544	0.0298658	-0.361289	1.74896	0.704037	0.72343	-0.952549	-0.921124	-0.946663	-1.64738	-1.2489	-1.03285	-1.27588	-1.33317
Wfdc2	1.3744	-0.84697	0.922633	-0.734929	1.93819	-0.0223065	-0.279597	-0.181933	0.371678	-0.203371	0.873914	0.440766	0.228779	-0.18209	-0.288391	-0.87297	-1.153	-0.348529	-0.250251	-0.732384	-0.643795
Magt1	1.09381	0.989072	0.926311	-0.000295971	1.93707	1.5012	0.409666	0.24346	0.282058	-0.338186	0.278928	-0.839934	-0.722315	-0.00959761	0.1979	-0.299366	-0.651901	-0.902171	-0.356682	-0.642472	-0.10297
Fzd5	0.133045	-0.170526	0.585799	0.566223	1.93575	0.512288	-0.215667	-0.0682139	-0.299247	-0.110351	0.00166077	-0.221089	-0.306214	0.248433	0.109394	0.151563	-0.371012	-0.261962	0.170442	-0.0680441	-0.26921
Slc37a4	1.2689	1.19817	0.738448	0.451919	1.93551	1.4506	0.529335	0.321169	0.0740537	-0.361492	-0.390412	-0.668838	-0.652322	-0.298889	-0.378444	-0.622287	-0.729457	-0.384606	-0.263932	-0.475565	-0.546838
Ap1b1	1.04233	0.0680179	1.00366	0.326223	1.93242	0.81386	0.475905	0.55619	0.476289	0.345126	-0.247636	-0.558942	-0.574373	-0.376962	-0.529226	-0.632208	-0.754348	-0.019606	0.438139	-0.535264	-0.334537
Aco1	1.0597	0.521409	1.41549	0.241948	1.9312	0.657395	0.865443	0.905109	0.5344	-0.0971378	-0.861585	-0.807538	-0.851103	-0.768413	-0.672123	0.00179179	-0.563518	-0.246685	-0.157561	-0.75216	-0.764495
Sec16a	1.12988	0.707608	0.712497	0.243699	1.92722	0.569456	0.520987	0.225525	-0.0383073	0.0887207	0.0712807	-0.49049	-0.552498	-0.0967767	-0.0656527	-0.575799	-0.578623	-0.395455	-0.250488	-0.409768	-0.704137
Mlec	1.09975	1.12258	1.21876	0.459659	1.92611	1.11036	1.09117	0.723129	0.257472	0.29975	-0.832231	-1.22139	-1.2975	-0.519266	-0.793263	-0.408736	-0.701278	-0.686144	-0.319257	-0.766971	-1.30058
Cds1	0.388339	0.635804	1.30148	0.21682	1.92278	1.2875	1.2894	0.792016	0.359344	0.144057	0.456068	-0.403506	-0.466664	-1.2138	-1.13149	-0.919986	-1.12886	-1.22915	-1.12248	-0.937306	-1.02575
Bri3bp	0.786673	0.723004	1.22862	0.934492	1.92277	0.781998	0.27276	-0.0465009	-0.182977	-0.370416	-0.392875	-0.587926	-0.415569	-0.392529	0.131497	-0.362049	-0.580272	-0.198647	0.0261755	-0.529914	-0.337562
Myo6	0.895527	0.0103611	1.61627	0.587989	1.92169	0.849846	1.21198	1.24398	0.39619	0.325904	0.131256	-0.679583	-0.735087	-1.32653	-1.09548	-0.743419	-1.32034	-0.90982	-0.403932	-0.976987	-1.56778
Tmem97	0.936198	0.444622	0.599604	0.101091	1.91727	1.81518	0.184914	0.676986	-0.133007	-0.767914	-0.522935	-0.677538	-0.677941	-0.33127	-0.358425	0.208196	-0.632401	-0.319545	-0.155824	-0.449911	-0.60384
Aspg	0.396192	-0.178983	1.58719	0.366258	1.91555	0.448492	-0.0227652	-0.0187432	-0.0175678	-0.49582	-0.385638	-0.336465	-0.390274	-0.0505059	-0.00637871	-0.561744	-0.525367	-0.0864372	-0.0965456	-0.248807	-0.246738
Slc27a4	0.92439	0.276781	0.41223	0.484686	1.91472	0.797918	0.633365	0.439264	0.251653	-0.297698	-0.253596	-0.431639	-0.327554	-0.51932	-0.324739	-0.182413	-0.429041	-0.232767	-0.108517	-0.390209	-0.516439
Naglu	0.455506	0.65861	0.535228	-0.106467	1.91462	0.406782	-0.173888	0.223034	-0.476526	-0.0883883	-0.258165	-0.482178	-0.45577	0.884208	0.29075	0.744235	-0.229159	-0.383687	-0.279837	-0.283992	-0.33449
Atp6ap1	0.395691	-0.0976578	0.57563	-0.226679	1.91024	1.28246	-0.16127	0.367391	-0.85339	0.394394	1.05061	-0.543885	-0.458753	0.242361	0.283651	0.367186	-0.658693	-0.749892	0.351396	-0.453046	-0.207555
Ogfod3	0.315761	0.216431	0.561629	0.667936	1.90896	1.42504	0.184288	0.417935	0.61547	-0.285943	-0.0758717	-0.354005	-0.452922	-0.22635	-0.468267	-0.0547742	-0.471401	-0.39373	-0.145523	-0.0274565	-0.559623
Nup210	0.192003	0.0439505	1.15839	0.0809348	1.90883	0.0804992	0.0171979	0.0984829	-0.0196846	0.289877	-0.175199	-0.321	-0.293786	-0.0393596	-0.0437415	-0.270366	-0.431479	-0.0385982	-0.0498215	-0.200714	-0.172396
Ptpro	-0.0715059	0.033735	1.09978	-0.0791164	1.90549	0.0370167	-0.0216069	-0.0582992	-0.0546822	0.0333668	-0.203437	-0.302565	-0.310071	-0.0735283	-0.0412867	-0.218978	-0.271008	-0.0799777	0.0341486	-0.147467	0.458292
Prps2	0.226055	-0.237243	1.28305	1.18276	1.90291	1.23356	1.31454	1.04653	0.653366	-0.322157	-0.0506619	-0.941385	-0.893131	-1.23883	-0.783498	-0.386719	-0.625248	-1.37966	-1.00897	-0.904605	-0.913866
Ifi30	1.31428	-0.0829542	1.12588	-0.337911	1.90077	0.983364	-0.125545	-0.110888	0.76055	0.293825	0.431049	-1.34881	-1.50336	0.401826	0.400898	0.342101	-0.525597	-0.942682	-0.837401	-1.22841	1.84314
Slc16a2	-0.162244	0.648188	0.989665	-0.00832914	1.90064	0.134568	-0.599396	-0.592094	-0.560765	-0.549676	-0.0593557	-0.321483	-0.294606	0.494601	1.01437	0.278476	-0.159203	-0.214757	0.195255	-0.358029	-0.644856
Slc39a8	-0.353711	1.46196	0.845975	-0.234026	1.89722	-0.0509431	1.49399	1.3897	0.736011	-0.320443	-0.502067	-0.740685	-0.689155	-1.44506	-1.35869	-0.577524	-0.674406	-1.53143	-1.39051	0.154866	-1.17185
Aacs	0.852457	0.283147	1.2187	-0.080366	1.89168	1.31767	0.398233	0.295533	0.0112936	-0.0563051	-0.251949	-0.651995	-0.55106	0.0894152	-0.105926	-0.166689	-0.610504	-0.526557	0.0875574	-0.691559	-0.601054
Rufy1	0.265857	-0.219299	1.49131	0.755309	1.89093	0.647833	0.301848	0.448891	-0.182661	-0.208586	-0.526007	-0.517555	-0.57917	-0.227543	-0.294546	0.013334	-0.434572	0.083451	-0.0742514	-0.400467	-0.0761186
Tmem64	1.79246	0.896979	1.28965	0.266126	1.88884	0.948459	0.161165	-0.0274976	-0.631108	-0.138858	-0.695088	-1.06363	-1.06422	-0.549257	0.0378825	-0.361093	-0.626391	-0.146574	0.551989	-0.398839	-0.95904
Dsc2	-0.374756	0.101226	0.907369	-0.174484	1.88475	1.05487	0.0990224	0.170048	0.1821	-0.347252	0.739903	-0.190538	-0.383311	-0.155569	-0.130783	-0.326113	-0.577574	-0.216141	-0.119399	-0.289124	-0.321265
Stt3b	0.856439	-0.200115	0.979803	-0.12751	1.88315	1.3323	-1.13094	-1.34199	-0.595215	0.317354	0.0455256	-0.997933	-1.07431	0.148635	0.542657	0.417274	-0.484099	0.605333	1.45127	-0.0293816	-1.36225
Sec61a1	1.20587	1.00726	0.671017	0.379913	1.8799	1.33788	0.302388	0.10578	-0.11782	-0.0162887	0.134252	-0.650744	-0.785387	0.0880712	-0.0521589	-0.232105	-0.705848	-0.837449	0.0286218	-0.500796	-1.09294
Etnk1	1.06233	0.881594	1.21366	0.269118	1.87866	0.792938	-0.0208596	-0.0454721	-0.621185	-0.179232	-0.919797	-1.18789	-1.0684	0.0903	0.182646	0.0774234	-0.247223	-0.351828	0.132183	0.336615	-0.083236
Tram1	1.1151	1.10397	1.17129	0.223976	1.8744	1.37683	0.00282988	-0.0129261	0.162376	-0.224249	-0.128217	-1.00644	-0.630876	0.125931	0.797249	0.395052	-0.670868	-0.908192	-0.265317	-0.748166	-0.605956
Slc35e2	0.194946	0.469917	1.11969	0.111293	1.87394	0.421883	0.596894	0.151558	-0.469454	0.156607	-0.144029	-0.48552	-0.54234	-0.0630322	-0.23564	-0.219628	-0.464381	-0.32222	0.0225119	-0.339816	-0.381395
Rbm10	0.516728	0.660888	1.33895	0.222832	1.86794	0.756352	0.156826	0.262563	0.223289	-0.393555	-0.177503	-0.499048	-0.38798	-0.104551	-0.360427	-0.135394	-0.438379	-0.153103	-0.0545594	-0.118707	-0.0992209
Pcx	0.658113	0.00386559	0.774469	0.392846	1.86488	1.09423	0.031791	0.0898606	-0.172261	-0.225919	0.166241	-0.145547	-0.132305	-0.200818	-0.179404	-0.515065	-0.530776	-0.235323	-0.266796	-0.323469	-0.344357
D15Ertd621e	0.518812	0.501854	0.831869	0.212183	1.86149	0.783302	1.10862	0.923552	-0.287943	0.141925	0.278775	-0.696373	-0.512624	-0.891929	-0.430658	-0.22035	-0.626623	-0.740106	-0.643937	-0.715597	-1.04659
Ctbs	0.174471	-0.0894349	0.421058	-0.0725307	1.8553	0.871648	0.00916821	0.0750963	0.203598	-0.182213	0.071216	-0.323679	-0.370794	0.0308827	-0.161731	0.489064	-0.232942	-0.212486	0.124259	0.0277831	-0.0825609
Notch1	0.552346	0.363879	0.95863	-0.0388125	1.85012	1.20177	-0.209523	-0.241573	-0.419221	-0.918787	0.205472	-0.223361	0.25291	-0.605608	0.00539145	-0.632331	-0.940787	-0.947657	-0.963767	1.2283	0.213943
Mboat2	-0.0433372	0.941163	1.25512	0.243943	1.8499	1.16408	-0.211496	-0.206286	0.405838	-0.285378	-0.400901	-0.385454	-0.469922	-0.168342	0.073865	-0.506536	-0.479557	-0.0837386	-0.0710386	-0.217691	-0.495979
Epn1	0.50774	0.503459	0.642419	0.376699	1.84914	0.794231	0.257034	0.372998	-0.00653345	0.183228	-0.230499	-0.609733	-0.449165	-0.0360061	-0.0379281	0.0640702	-0.340962	-0.383899	0.310977	-0.369695	0.0721924
Stt3a	1.47255	1.09722	0.600368	-0.0485682	1.84913	1.46378	0.0880013	0.249045	-0.394199	-0.293469	0.332086	-0.911677	-0.671871	-0.214686	-0.235257	0.576382	-0.630885	-0.114396	1.02648	-0.655209	-0.823127
Vkorc1	0.220648	-0.0772682	0.796756	0.385153	1.84873	1.37322	0.0271924	0.242627	0.983888	-1.40112	0.140115	-0.689161	-0.991333	1.1952	0.790951	0.996095	-0.320536	-1.2114	-1.22009	-0.86193	-0.847817
Atp1b1	-0.714954	0.188028	0.873187	-0.887556	1.84639	-0.300485	-0.952104	-0.767441	-0.602766	1.69396	1.34583	1.26269	0.723669	-1.81143	-1.562	-1.69981	-1.85143	-1.79827	-1.58106	-1.28141	-1.75498
Wwc1	0.473485	0.980621	1.21238	0.480829	1.84342	0.911451	0.607355	0.201468	-0.370097	0.422929	0.170874	-0.270018	-0.223672	-0.573435	-0.483169	-1.09002	-1.19771	-0.659181	-0.465661	-0.744132	-0.633857
Snx14	0.527233	0.1008	0.79164	-0.533619	1.84291	1.18348	0.194836	0.245568	-0.243158	0.0679328	-0.515455	-0.504508	-0.418306	0.0567528	-0.133822	-0.0630936	-0.340781	0.0425045	0.522743	-0.516969	-0.552346
Rnf145	0.435617	0.0989529	0.0692671	0.135008	1.83659	0.327071	0.242659	0.305819	0.358002	0.431018	0.116347	-0.318115	-0.322323	-0.0561102	-0.359888	-0.221088	-0.329625	0.183417	-0.0476169	-0.308631	-0.087142
Ocrl	0.477063	0.400358	0.721745	0.41833	1.83355	1.22801	-0.00206008	-0.0505631	-0.208015	-0.59289	-0.441744	-0.405502	-0.202356	-0.113157	-0.0320727	-0.514819	-0.366272	0.0434062	0.0480707	-0.3431	-0.452914
Hsp90b1	1.75523	1.22664	0.204494	-0.490991	1.83223	1.82281	-0.0319593	0.389012	0.31122	-1.04692	0.243994	-1.14454	-0.998246	-0.211409	0.204742	0.265675	-1.27045	-1.22086	-0.59683	-1.21025	-1.38479
Gusb	0.0117621	-0.27009	0.932845	0.0973012	1.82231	1.12696	-0.177543	-0.0293453	-0.0421776	-0.228759	-0.187763	-0.37726	-0.356797	0.250942	0.116548	-0.0724533	-0.318679	-0.0650525	0.108936	-0.15209	0.620865
Gyk	1.28096	0.452535	1.77851	0.639417	1.82198	1.24668	0.734606	0.516119	-0.456513	-1.05869	-0.656643	-0.876358	-0.623287	-0.605389	-0.606683	-0.834907	-0.799735	-0.362614	-0.280257	-0.874417	-0.321519
D17Wsu104e	1.09213	0.672799	0.779619	0.24125	1.82137	1.5155	0.941884	0.663666	0.325563	-0.660962	0.285628	-0.6759	-0.537904	-0.563298	-0.4802	-0.527334	-0.809176	-0.909005	0.207491	-0.74834	-0.401124
Slc31a2	0.224956	0.665567	0.794926	0.251267	1.82108	0.990396	0.760847	1.14486	0.361489	0.3161	0.605226	-0.301943	-0.223973	-1.21717	-0.911012	-0.664457	-0.901498	-1.15273	-1.02963	-0.855712	0.424568
Zdhhc4	0.233975	0.415845	1.29333	0.849265	1.82037	0.83472	0.762445	0.684886	-0.0858308	-0.0937364	-0.31098	-0.802066	-0.738548	-0.557345	-0.580001	-0.497481	-0.416589	0.205019	0.0239591	-0.651889	-0.803786
Nr2f6	0.913444	0.462599	0.923039	0.316626	1.81852	1.00933	0.411328	0.243315	0.278167	-0.430205	-0.0615178	-0.40855	-0.39747	-0.210463	-0.245698	-0.345757	-0.405486	-0.313229	0.0698775	-0.500701	-0.862555
Lrp10	0.672394	0.0578218	0.514264	0.0342264	1.81785	1.02244	0.480119	0.0975055	-0.0659178	1.15584	-0.0143685	-0.609321	-0.712878	-0.162001	-0.158022	-0.616743	-0.836308	-0.891696	-0.411638	0.0832145	-0.074171
Surf4	0.976083	1.35447	0.81548	-0.0226336	1.81676	1.41573	0.361817	0.315247	-0.304488	-0.317194	0.0479627	-0.609814	-0.491711	0.147655	0.204072	-0.131478	-0.677972	-0.767335	-0.564575	-0.914161	-0.617284
Tor2a	0.787565	0.419801	0.82288	0.367343	1.81592	1.2201	0.331621	0.463024	0.3721	-0.445204	-0.113632	-0.361626	-0.270583	-0.317951	-0.365208	-0.425829	-0.506134	-0.562578	-0.375331	-0.19047	0.0981783
Pddc1	0.680497	1.4164	1.21204	0.395998	1.81283	1.16064	0.974316	0.568595	-0.11305	-0.331376	-0.703624	-0.755308	-0.66258	-0.552898	-0.600404	-0.532819	-0.688682	-0.682222	-0.452365	-0.542713	-0.0153813
Lamp1	0.259786	0.817232	0.567079	-0.329304	1.81104	1.46297	-0.592829	-0.144462	-0.28149	-0.192013	0.569104	-0.424411	-0.647695	0.201086	0.0518445	-0.321315	-0.762609	-0.835432	0.707485	-0.802629	0.65142
Asph	-0.861775	-0.318378	0.518845	-0.524732	1.80876	0.0992028	-0.554121	-0.448418	-0.0179657	-0.481403	0.752763	-0.43905	-0.465623	0.251357	-0.203817	1.0667	0.477954	0.425049	0.767754	-0.720205	0.158132
Pigx	0.403765	0.265176	0.759963	0.380102	1.80787	1.24713	0.479374	0.512207	0.409829	-0.0349637	-0.24937	-0.338446	-0.544804	-0.332601	-0.177229	-0.77312	-0.544618	-0.473826	-0.108116	-0.254635	-0.446342
Setx	0.643811	0.512286	0.864402	0.253735	1.80674	0.726767	0.135413	0.168792	-0.28171	-0.115735	0.0464783	-0.334676	-0.353833	-0.290509	-0.0687964	-0.232888	-0.397929	-0.131642	-0.0886799	-0.158563	-0.529262
Sema4a	1.64973	-0.26693	0.566407	-0.0587069	1.80503	1.00956	0.18731	0.0899645	0.398673	-0.423368	0.060903	-0.125626	-0.11481	-0.20451	-0.361027	-0.643032	-0.859026	-0.440529	-0.479263	-0.505045	0.884877
[truncated: 9,193 more rows]
