# Supplementary material for: An atlas of cell types in the mouse epididymis and vas deferens
Source: eLife. 2020 Jul 30;9:e55474. doi: 10.7554/eLife.55474 (PMC7426093; doi:10.7554/eLife.55474)
Supplement: Supplementary file 3. — Output of DESingle for the 15 principal cell subclusters (Figure 3B). For each subcluster, table includes fraction of cells not expressing the gene in question (‘theta_2’, or estimated true zeroes), average expression across all cells (‘cluster_UPM’, expressed as UMIs per million), and average expression level only in positive cells (‘expressing_cell_meanUPM’). [file elife-55474-supp3.xlsx]

## Sheet: one_table
gene	theta_2_PC1	cluster_UPM_PC1	expressing_cell_meanUPM_PC1	theta_2_PC02	cluster_UPM_PC02	expressing_cell_meanUPM_PC02	theta_2_PC03	cluster_UPM_PC03	expressing_cell_meanUPM_PC03	theta_2_PC04	cluster_UPM_PC04	expressing_cell_meanUPM_PC04	theta_2_PC05	cluster_UPM_PC05	expressing_cell_meanUPM_PC05	theta_2_PC06	cluster_UPM_PC06	expressing_cell_meanUPM_PC06	theta_2_PC07	cluster_UPM_PC07	expressing_cell_meanUPM_PC07	theta_2_PC08	cluster_UPM_PC08	expressing_cell_meanUPM_PC08	theta_2_PC09	cluster_UPM_PC09	expressing_cell_meanUPM_PC09	theta_2_PC10	cluster_UPM_PC10	expressing_cell_meanUPM_PC10	theta_2_PC11	cluster_UPM_PC11	expressing_cell_meanUPM_PC11	theta_2_PC12	cluster_UPM_PC12	expressing_cell_meanUPM_PC12	theta_2_PC13	cluster_UPM_PC13	expressing_cell_meanUPM_PC13	theta_2_PC14	cluster_UPM_PC14	expressing_cell_meanUPM_PC14	theta_2_PC15	cluster_UPM_PC15	expressing_cell_meanUPM_PC15
0610007P14Rik	0.807334	51.3145	427.071	0.86578	64.7326	534.161	0.894569	84.8989	629.739	0.915203	43.7097	331.292	0.933389	29.1705	495.899	0.933272	52.2888	908.583	0.904478	61.2389	478.736	0.889096	74.0774	635.512	0.681758	127.968	447.701	0.850091	77.0023	481.785	0.844555	141.777	1075.44	0.672339	120.837	293.089	0.748199	133.906	463.916	0.840992	72.1796	264.844	0.865324	64.8091	448.248
0610009B22Rik	0.885159	33.5518	270.907	0.865702	51.5463	415.664	0.929725	66.7063	1421.8	0.966081	17.4839	443.45	0.934791	31.2541	430.011	0.94964	35.6515	1235.93	0.918603	39.2557	546.977	0.93897	34.6491	721.045	0.900569	35.8309	505.239	0.958852	17.1116	406.958	0.938279	33.3592	828.941	0.760282	56.352	394.805	0.828778	59.7538	350.917	0.763092	87.0401	348.499	0.795148	127.173	640.443
0610009O20Rik	0.958847	11.8418	190.894	0.958448	15.5838	317.249	0.991689	6.06421	889.68	0.949122	26.2258	600.466	0.96594	18.7525	602.144	0.933754	42.7818	703.023	0.955301	20.413	432.606	0.963517	17.922	401.128	0.980543	5.1187	325.048	0.958852	17.1116	853.455	0.970617	19.4595	847.723	0.893493	19.1713	142.391	0.96646	8.6391	238.543	0.924179	16.9834	352.909	0.958418	13.451	347.102
0610010F05Rik	0.965139	7.89454	315.509	0.918759	33.5651	495.528	0.975066	18.1926	463.676	0.983041	8.74195	410.509	0.954335	20.8361	713.814	0.927585	49.9121	747.786	0.934671	29.8343	625.121	0.98369	9.55838	710.602	0.961085	10.2374	311.502	0.972568	11.4077	217.465	0.974283	13.8997	1140.41	0.937836	12.1999	120.241	0.907871	23.0376	259.772	0.950888	10.6147	159.492	0.978405	8.5597	170.792
0610010K14Rik	0.857097	37.4991	560.031	0.854656	67.1301	317.98	0.91328	78.8347	1574.05	0.966081	17.4839	393.584	0.933389	29.1705	629.069	0.977918	14.2606	611.093	0.894576	65.9496	744.257	0.898491	62.1295	589.017	0.807623	81.8992	496.515	0.90616	42.779	499.009	0.92962	41.699	442.41	0.704821	66.2281	288.283	0.817094	63.3534	386.298	0.845262	44.5815	397.604	0.808475	75.8145	508.041
0610011F06Rik	0.877986	27.6309	315.34	0.89049	43.1551	610.66	0.925199	54.5779	572.594	0.898243	52.4517	485.065	0.840834	79.1771	473.95	0.891222	85.5635	1005.22	0.818689	138.18	746.967	0.914722	46.5971	809.449	0.81069	69.1025	292.965	0.931421	28.5194	468.462	0.905417	58.3786	1100.8	0.67203	92.3708	267.623	0.654424	159.103	457.676	0.644171	159.22	436.879	0.658464	205.433	775.418
0610030E20Rik	0.930278	15.7891	229.192	0.93715	22.7763	398.105	0.991689	6.06421	738.007	1	0	0	0.924352	35.4213	495.877	0.966877	21.3909	551.32	0.936772	32.9748	346.046	0.954583	29.8699	346.78	0.941628	15.3561	860.324	0.979426	8.55581	697.327	0.970617	19.4595	377.233	0.812402	38.9235	232.94	0.876523	41.7556	298.065	0.878907	36.0898	292.98	0.918227	35.4616	292.147
0610037L13Rik	0.906834	23.6836	467.742	0.917868	32.3663	366.24	0.975066	18.1926	499.618	0.983041	8.74195	369.14	0.924352	35.4213	435.202	0.923908	52.2888	823.549	0.926998	47.1069	509.894	0.946492	26.2855	705.719	0.912442	23.0342	175.738	0.94719	25.6674	754.2	0.975713	16.6796	378.904	0.713923	70.8757	328.311	0.787769	63.3534	453.415	0.676783	114.638	377.827	0.814518	91.711	434.279
1110001J03Rik	0.808004	63.1564	357.32	0.832909	73.1239	564.544	0.91944	66.7063	1264.03	0.932162	34.9678	609.916	0.847308	68.759	403.01	0.955836	28.5212	1097.56	0.876291	91.0733	511.917	0.894773	66.9087	847.612	0.697674	102.374	374.148	0.972568	11.4077	476.536	0.893813	75.0582	563.47	0.607729	152.209	459.008	0.670868	159.823	530.606	0.681979	159.22	482.625	0.733709	156.52	711.926
1110004E09Rik	0.938993	13.8155	93.8431	0.909023	38.3601	612.233	0.983377	12.1284	1477.03	0.983041	8.74195	852.515	0.881218	60.4246	484.26	0.939654	45.1585	790.179	0.916175	50.2473	458.328	0.948001	28.6751	709.939	0.898491	33.2716	491.25	0.972568	11.4077	837.255	0.948566	27.7993	800.812	0.813509	37.1807	294.034	0.866702	35.9962	248.966	0.861076	53.0733	417.629	0.861391	47.6897	746.08
1110004F10Rik	0.768343	65.13	308.315	0.837036	80.3164	493.566	0.869676	103.092	1258.86	0.949122	26.2258	1130.91	0.820394	100.013	763.64	0.910275	76.0565	807.317	0.844529	100.495	642.614	0.862877	81.2462	753.688	0.782246	94.696	372.104	0.892465	48.4829	685.519	0.906745	61.1585	654.08	0.529407	160.923	353.617	0.641474	167.023	448.495	0.630426	152.851	489.774	0.743553	140.624	535.031
1110007C09Rik	0.930278	15.7891	428.02	0.903808	51.5463	314.052	0.983377	12.1284	893.566	0.966081	17.4839	991.162	0.931736	27.0869	557.659	0.911726	80.81	746.936	0.846323	105.205	566.53	0.838828	113.506	662.255	0.684696	133.086	457.885	0.84157	77.0023	703.844	0.877362	80.618	705.561	0.584816	127.228	350.34	0.749139	99.3496	459.501	0.701646	106.147	275.49	0.822366	83.1513	470.153
1110008F13Rik	0.871484	41.4464	308.9	0.873916	64.7326	396.304	0.911154	72.7705	1025.35	0.949122	26.2258	322.408	0.887734	50.0066	489.634	0.867286	95.0706	661.96	0.900321	70.6603	671.393	0.914794	52.5711	473.806	0.801138	71.6618	283.738	0.908022	45.631	685.669	0.958852	22.2395	793.9	0.682031	69.1329	268.528	0.75862	87.1109	313.095	0.770973	72.1796	350.288	0.827631	77.0373	364.163
1110008L16Rik	0.982569	3.94727	214.249	0.983212	7.19251	269.828	0.985162	18.1926	659.232	1	0	0	0.994749	2.08361	203.376	0.992639	4.75353	561.461	0.983764	9.42137	795.279	0.987839	5.97399	345.685	0.990271	2.55935	154.036	0.993142	2.85194	323.311	0.994857	2.77993	188.786	0.940526	11.038	194.339	0.959212	9.35902	557.499	0.945827	12.7376	337.789	0.939518	19.565	394.57
1110008P14Rik	0.746353	157.891	745.732	0.740147	221.769	616.149	0.894977	121.284	839.598	0.898243	52.4517	1013.49	0.872242	100.013	348.822	0.944795	35.6515	683.292	0.854361	119.337	627.665	0.891955	74.0774	574.572	0.823538	71.6618	473.2	0.972568	11.4077	524.706	0.947432	38.9191	693.907	0.433392	254.455	515.367	0.586343	221.017	507.999	0.55546	218.662	520.499	0.687296	198.096	638.539
1110012L19Rik	0.967451	9.86818	142.692	0.950227	16.7825	538.513	0.95252	42.4495	1481.66	0.983041	8.74195	1131.22	0.984247	6.25082	186.629	0.985279	9.50706	801.45	0.959814	20.413	1022.43	0.992703	3.58439	548.5	0.931899	17.9155	356.428	0.979426	8.55581	488.154	0.989713	5.55986	620.571	0.914133	15.1047	210.436	0.952937	10.7989	140.85	0.942035	12.7376	187.694	0.947078	17.1194	446.374
1110032A03Rik	0.898141	25.6573	447.641	0.930109	31.1675	320.814	0.941821	42.4495	890.995	0.983041	8.74195	286.205	0.9556	22.9197	1105.38	0.952155	30.8979	699.643	0.928248	40.8259	551.259	0.936547	35.8439	743.689	0.888844	35.8309	235.097	0.986284	5.70387	1190.29	0.92962	41.699	684.244	0.536209	167.894	408.102	0.698733	119.508	400.072	0.685083	127.376	405.995	0.749172	156.52	578.954
1110037F02Rik	0.967451	9.86818	125.225	0.944252	20.3788	492.067	0.975066	18.1926	632.379	0.983041	8.74195	1404.49	0.968494	12.5016	362.82	0.956986	30.8979	638.239	0.959814	20.413	762.4	0.964291	19.1168	642.987	0.990271	2.55935	79.3462	0.958852	17.1116	644.319	0.982189	19.4595	463.177	0.898768	22.657	176.52	0.858674	35.9962	310.501	0.898842	36.0898	317.85	0.949302	19.565	474.84
1110038F14Rik	0.905419	33.5518	208.007	0.890962	38.3601	787.885	0.958444	30.321	942.801	0.983041	8.74195	345.662	0.887734	50.0066	513.043	0.971659	21.3909	491.864	0.941072	32.9748	534.266	0.96595	16.7272	564.422	0.883256	30.7122	526.751	0.967617	17.1116	1073.64	0.980791	13.8997	786.802	0.801467	47.6378	234.239	0.827753	46.7951	273.688	0.779884	72.1796	506.452	0.917369	34.2388	392.512
1110051M20Rik	0.956424	9.86818	161.985	0.969082	11.9875	465.839	0.991689	6.06421	906.618	1	0	0	0.980389	10.418	713.754	1	0	0	0.982808	7.85114	902.756	0.988515	7.16878	648.662	0.990271	2.55935	123.778	1	0	0	0.989713	5.55986	274.327	0.964843	6.39043	104.351	0.981175	4.31955	692.397	0.943969	10.6147	141.426	0.979181	9.78251	373.406
1110057K04Rik	0.973854	5.92091	195.745	0.946118	22.7763	483.03	0.991689	6.06421	276.855	0.949122	26.2258	396.053	0.978996	8.33443	532.466	0.974238	16.6374	762.72	0.962178	17.2725	602.506	0.970814	14.3376	657.299	0.970814	7.67805	871.889	0.979426	8.55581	322.149	0.969139	16.6796	949.72	0.950657	12.1999	230.023	0.939178	15.8383	407.682	0.924179	16.9834	201.866	0.940726	20.7878	277.121
1110058L19Rik	0.915524	21.71	463.77	0.88953	41.9563	533.928	0.966755	24.2568	207.892	0.949122	26.2258	449.784	0.941167	31.2541	502.817	0.988959	7.13029	503.084	0.942557	36.1153	451.919	0.933499	41.8179	833.639	0.845079	53.7464	469.201	0.993142	2.85194	306.279	0.941233	38.9191	1099.61	0.695333	87.1423	260.823	0.779807	71.2726	360.555	0.737259	84.9172	512.99	0.75755	116.167	533.309
1110059E24Rik	0.973854	5.92091	117.609	0.971558	9.59001	935.536	0.977113	24.2568	1022.46	0.953298	34.9678	731.424	0.924352	35.4213	521.976	0.978975	16.6374	696.912	0.936772	32.9748	1050.02	0.937177	35.8439	1238.28	0.902713	25.5935	677.86	0.945137	22.8155	576.005	0.939886	36.1391	642.923	0.817957	37.1807	289.008	0.857325	38.156	311.247	0.847315	48.8274	394.939	0.899522	41.5757	803.397
1110059G10Rik	0.956424	9.86818	214.89	0.96554	13.1863	240.706	0.983377	12.1284	781.767	0.983041	8.74195	665.779	0.970002	14.5852	199.51	0.977918	14.2606	713.472	0.944986	25.1237	1142.18	0.975678	11.948	699.204	0.980543	5.1187	1020.69	0.986284	5.70387	328.351	0.994857	2.77993	623.441	0.8991	19.7522	260.591	0.894801	28.797	360.527	0.945827	12.7376	427.365	0.8954	35.4616	388.135
1110065P20Rik	0.770714	96.7082	332.23	0.811366	124.67	535.045	0.841055	139.477	1042.31	0.983041	8.74195	580.046	0.861614	70.8426	597.491	0.933754	42.7818	989.773	0.833065	102.065	582.608	0.846786	112.311	700.275	0.748785	112.611	433.362	0.862034	68.4465	553.863	0.905417	58.3786	855.07	0.582936	124.323	336.85	0.718233	105.109	344.556	0.737836	116.761	442.432	0.818667	84.3742	514.354
1190002N15Rik	0.991285	1.97364	330.469	0.98042	9.59001	246.419	0.975066	18.1926	829.308	0.983041	8.74195	1124.86	0.994749	2.08361	211.104	0.876599	95.0706	639.31	0.949298	32.9748	680.191	0.96127	25.0907	285.345	0.931899	17.9155	351.224	0.948776	28.5194	350.478	0.979426	11.1197	312.938	0.996373	0.580948	84.6812	0.993725	1.43985	459.296	0.981942	4.24586	472.376	1	0	0
1190007I07Rik	0.947708	11.8418	229.822	0.961995	14.385	314.492	0.975066	18.1926	1148.09	0.983041	8.74195	669.792	0.978996	8.33443	934.329	0.970557	19.0141	834.734	0.939216	29.8343	953.479	0.968382	15.5324	848.272	0.961085	10.2374	327.818	0.96571	14.2597	1319.45	1	0	0	0.875242	27.3046	315.815	0.932921	17.2782	298.187	0.92777	16.9834	365.669	0.938019	23.2335	585.326
1200014J11Rik	0.930278	15.7891	152.531	0.969082	11.9875	146.668	0.983377	12.1284	302.808	0.983041	8.74195	508.13	0.978996	8.33443	231.727	0.981598	11.8838	427.811	0.989685	4.71069	556.424	0.961862	20.3116	772.037	0.970814	7.67805	106.342	0.972568	11.4077	208.722	0.98457	8.3398	1104.26	0.941965	9.29518	104.276	0.947669	12.9586	238.177	0.939454	16.9834	276.169	0.964502	11.0053	248.786
1500009L16Rik	0.953322	17.7627	198.71	0.894871	69.5276	323.538	0.93351	48.5137	970.241	0.983041	8.74195	583.431	0.905481	37.5049	469.509	1	0	0	0.990532	6.28091	1563.32	0.995136	2.38959	537.153	0.990271	2.55935	553.403	1	0	0	0.985836	11.1197	180.887	0.981864	2.90474	410.233	0.993725	1.43985	436.375	0.990971	2.12293	2061.86	0.98866	3.66844	710.35
1500012F01Rik	0.844132	130.26	633.664	0.87938	169.024	822.41	0.972805	66.7063	1972.55	0.932162	34.9678	418.345	0.831921	135.434	626.375	0.935989	47.5353	723.291	0.859063	124.048	1015.27	0.883346	211.479	902.18	0.727751	222.664	632.658	0.941445	54.1868	707.065	0.941234	58.3786	780.976	0.677167	94.1137	309.958	0.750463	90.7105	452.005	0.815213	74.3026	532.686	0.839355	66.0319	598.192
1600002K03Rik	0.947708	11.8418	173.634	0.931079	26.3725	251.984	0.96896	30.321	352.207	0.983041	8.74195	600.24	0.949103	22.9197	411.005	0.981598	11.8838	642.792	0.970099	15.7023	253.327	0.976425	13.1428	397.068	0.970814	7.67805	179.699	0.972568	11.4077	509.241	0.963996	19.4595	1224.81	0.938338	9.87612	272.75	0.950803	12.2387	232.258	0.983881	6.36879	184.268	0.953922	20.7878	186.624
1600012H06Rik	0.965139	7.89454	666.016	0.946118	22.7763	260.531	0.991689	6.06421	129.199	0.932162	34.9678	751.067	0.947489	20.8361	631.81	0.945966	38.0282	916.318	0.949518	25.1237	452.292	0.949714	26.2855	652.892	0.941628	15.3561	288.744	0.940361	28.5194	631.813	0.924484	44.4789	758.338	0.898767	22.076	156.485	0.890786	33.1165	363.053	0.873597	33.9669	282.908	0.916434	31.7932	267.151
1600014C10Rik	1	0	0	0.927328	33.5651	809.541	0.983377	12.1284	1078.84	1	0	0	1	0	0	0.99632	2.37676	171.321	0.996562	1.57023	2217.29	0.995136	2.38959	458.167	1	0	0	1	0	0	1	0	0	0.981864	2.90474	209.852	0.981175	4.31955	198.773	0.981942	4.24586	98.321	0.979438	6.11407	196.376
1700007K09Rik	0.991285	1.97364	175.254	0.996445	1.19875	226.706	1	0	0	1	0	0	0.994749	2.08361	682.594	0.981598	11.8838	419.527	0.967529	18.8427	1002.43	0.971574	15.5324	505.134	0.97321	10.2374	337.098	0.974388	14.2597	423.783	0.98457	8.3398	248.05	0.992746	1.1619	132.978	0.996862	0.719925	72.7273	1	0	0	1	0	0
1700011H14Rik	1	0	0	0.989334	3.59626	1257.1	0.991689	6.06421	589.275	0.949122	26.2258	638.49	0.919128	37.5049	957.791	0.912875	59.4191	888.151	0.899942	59.6687	723.39	0.958317	25.0907	388.383	0.980543	5.1187	1432.41	0.96571	14.2597	574.87	0.995642	5.55986	185.185	0.989118	1.74285	129.678	0.996862	0.719925	136.78	0.981942	4.24586	105.957	1	0	0
1700017B05Rik	1	0	0	0.97969	8.39126	817.996	0.975066	18.1926	834.501	0.983041	8.74195	372.301	0.970002	14.5852	460.764	0.981598	11.8838	462.04	0.967529	18.8427	334.37	0.949788	32.2595	518.654	0.931899	17.9155	185.724	0.972568	11.4077	801.298	0.979426	11.1197	409.069	0.901757	18.0094	133.373	0.932128	20.1579	377.342	0.923658	23.3522	273.595	0.981099	6.11407	746.162
1700019D03Rik	0.937763	23.6836	227.854	0.864439	62.3351	486.448	0.975066	18.1926	800.861	0.983041	8.74195	252.08	0.989498	4.16721	178.89	0.992639	4.75353	820.565	0.990532	6.28091	250.162	0.978849	11.948	331.592	1	0	0	0.986284	5.70387	383.554	0.969139	16.6796	812.678	0.946514	12.1999	150.388	0.967934	10.0789	247.933	0.950274	16.9834	168.13	0.977319	7.33688	225.566
1700021F05Rik	0.956424	9.86818	693.597	0.953782	15.5838	445.475	1	0	0	1	0	0	0.976189	14.5852	451.048	0.99632	2.37676	411.353	0.973523	14.1321	245.158	0.982975	8.36358	795.419	0.961085	10.2374	224.295	0.986284	5.70387	586.903	0.969139	16.6796	1010.42	0.907976	16.2666	206.862	0.901036	28.0771	300.509	0.873597	31.844	179.525	0.919182	30.5703	460.62
1700021K19Rik	1	0	0	0.985779	4.79501	249.742	1	0	0	0.983041	8.74195	397.456	0.984247	6.25082	534.199	0.981598	11.8838	1014.13	0.996562	1.57023	275.938	0.97811	10.7532	300.542	0.980543	5.1187	239.244	0.993142	2.85194	292.312	0.979426	11.1197	331.204	0.97461	4.06664	111.187	0.98745	2.8797	154.723	0.972914	6.36879	136.643	0.99244	2.44563	150.76
1700024P16Rik	0.965139	7.89454	184.4	0.986722	5.99376	619.543	0.983377	12.1284	1002.97	1	0	0	0.978199	25.0033	364.439	0.996882	4.75353	1163.47	0.977698	14.1321	264.608	0.936547	35.8439	614.098	0.912442	23.0342	373.55	0.935235	34.2232	486.153	0.931017	44.4789	1127.11	0.836646	37.7617	238.559	0.844582	47.515	297.672	0.891722	36.0898	236.701	0.935215	25.6791	688.896
1700025G04Rik	0.982569	3.94727	1051.49	0.972623	10.7888	365.868	1	0	0	0.983041	8.74195	1201.92	0.978996	8.33443	917.24	0.970557	19.0141	514.274	0.962178	17.2725	963.388	0.997568	1.1948	374.251	1	0	0	0.986284	5.70387	247.024	1	0	0	0.989118	1.74285	112.303	0.996862	0.719925	282.805	0.990971	2.12293	700.28	1	0	0
1700026L06Rik	0.991285	1.97364	76.0919	1	0	0	1	0	0	1	0	0	0.989498	4.16721	735.936	0.94964	35.6515	646.163	0.917531	53.3878	687.119	0.995136	2.38959	264.942	0.980543	5.1187	545.164	0.993142	2.85194	1773.05	1	0	0	0.978237	3.48569	117.408	0.996862	0.719925	179.565	0.983881	6.36879	233.143	0.98866	3.66844	83.0667
1700029J07Rik	0.965139	7.89454	318.441	0.982224	5.99376	136.73	0.991689	6.06421	173.913	0.983041	8.74195	575.374	0.968494	12.5016	731.688	0.985279	9.50706	727.772	0.975931	10.9916	1043.89	0.987839	5.97399	293.253	0.990271	2.55935	1135.07	0.993142	2.85194	344.59	0.994857	2.77993	1733.1	0.969331	6.97138	119.778	0.950803	12.2387	266.181	0.92777	16.9834	95.1893	0.970891	11.0053	545.965
1700037C18Rik	0.973854	5.92091	217.277	0.968003	10.7888	402.597	0.991689	6.06421	1161.44	1	0	0	0.963243	14.5852	306.477	1	0	0	0.986247	6.28091	1222.5	0.990271	4.77919	1011.34	0.980543	5.1187	393.626	0.972568	11.4077	370.234	0.989713	5.55986	714.578	0.931491	13.9428	162.896	0.930975	16.5583	202.134	0.906233	21.2293	95.0523	0.970891	11.0053	432.967
1700037H04Rik	0.991285	1.97364	123.518	0.96554	13.1863	225.188	1	0	0	0.966081	17.4839	498.848	0.984247	6.25082	840.727	0.992639	4.75353	428.096	0.993123	3.14046	149.253	0.992703	3.58439	1450.83	0.902713	25.5935	325.412	0.972568	11.4077	1414.75	0.98457	8.3398	515.954	0.94063	9.29518	368.479	0.978037	5.03947	120.951	0.92777	16.9834	203.571	0.964301	15.8966	551.973
1700040L02Rik	1	0	0	1	0	0	0.991689	6.06421	1689.19	1	0	0	0.994749	2.08361	131.027	0.988959	7.13029	555.473	0.969055	14.1321	723.639	0.980543	9.55838	672.403	0.93476	20.4748	243.299	0.993142	2.85194	323.311	0.989713	5.55986	186.261	0.941965	9.29518	224.994	0.9749	5.7594	167.986	0.975312	4.24586	102.651	0.954639	14.6738	309.341
1700047I17Rik2	0.973854	5.92091	348.978	0.989334	3.59626	1590.86	1	0	0	1	0	0	0.989498	4.16721	245.731	0.992639	4.75353	1808.02	0.996562	1.57023	95.1656	0.987839	5.97399	348.14	0.963667	12.7968	314.284	0.986284	5.70387	154.791	0.975713	16.6796	412.074	0.938338	9.87612	208.765	0.947669	12.9586	379.235	0.959622	8.49172	249.378	0.967127	12.2281	857.167
1700056E22Rik	0.938993	13.8155	122.719	0.972623	10.7888	360.81	0.991689	6.06421	738.007	1	0	0	0.989498	4.16721	167.154	0.974238	16.6374	766.989	0.996562	1.57023	80.032	0.974	14.3376	369.06	0.947894	23.0342	200.334	0.986284	5.70387	1297.63	0.979426	11.1197	870.128	0.660739	92.9518	273.54	0.836498	67.6729	384.464	0.796646	76.4255	398.637	0.805245	90.4882	513.113
1700088E04Rik	0.991285	1.97364	97.8569	0.971558	9.59001	500.294	0.991689	6.06421	2049.18	1	0	0	0.980389	10.418	200.678	0.956986	30.8979	1078.99	0.952019	29.8343	450.227	0.971574	15.5324	407.85	0.925083	23.0342	302.434	0.979426	8.55581	204.445	0.963996	19.4595	402.721	0.795372	46.4759	361.747	0.842533	46.0752	235.775	0.845261	46.7045	441.948	0.893727	46.4669	562.08
1700094D03Rik	1	0	0	0.99289	2.3975	440.157	1	0	0	1	0	0	0.989498	4.16721	1096.42	0.963196	23.7676	541.202	0.975931	10.9916	709.615	0.97275	17.922	693.884	0.990271	2.55935	88.9284	0.987757	8.55581	211.771	0.989713	5.55986	1001.53	0.97461	4.06664	98.7071	0.981175	4.31955	398.545	0.972914	6.36879	204.046	0.98866	3.66844	439.245
1700112E06Rik	0.982569	3.94727	129.007	0.996445	1.19875	86.949	1	0	0	0.966081	17.4839	345.487	0.973745	10.418	844.473	0.973718	28.5212	943.853	0.927409	39.2557	557.917	0.97811	10.7532	547.044	0.92217	20.4748	329.029	1	0	0	0.975713	16.6796	371.228	0.952847	7.55233	115.211	0.922075	21.5977	257.575	0.945827	14.8605	251.816	0.962199	12.2281	279.71
1700123O20Rik	0.886701	25.6573	225.92	0.931079	26.3725	352.711	0.958444	30.321	1303.6	0.966081	17.4839	587.669	0.954335	20.8361	687.442	0.974238	16.6374	656.522	0.932346	32.9748	546.843	0.952144	25.0907	745.787	0.840879	63.9838	467.971	0.979426	8.55581	688.345	0.979426	11.1197	516.299	0.761806	50.5425	263.23	0.8335	52.5545	254.697	0.847315	48.8274	402.387	0.881649	63.5863	567.552
1810011O10Rik	0.869805	39.4727	267.004	0.883265	51.5463	719.133	0.983377	12.1284	1277.01	0.985631	17.4839	1128.03	0.835632	81.2607	704.441	0.95064	38.0282	1118.73	0.925371	53.3878	896.167	0.991316	7.16878	386.096	0.990271	2.55935	538.793	1	0	0	0.995642	5.55986	167.757	0.988132	6.39043	831.553	0.984312	3.59962	604.204	0.990971	2.12293	67.9302	0.99244	2.44563	856.446
1810013L24Rik	0.932887	17.7627	305.26	0.898448	41.9563	323	0.93351	48.5137	741.096	0.966081	17.4839	295.872	0.859595	79.1771	637.547	0.936925	49.9121	918.979	0.911188	48.6771	399.226	0.943591	38.2335	783.056	0.900569	35.8309	531.574	0.903989	39.9271	504.442	0.92962	41.699	620.806	0.809579	43.5711	189.013	0.862833	38.8759	376.953	0.842966	42.4586	352.365	0.909868	36.6844	328.981
1810022K09Rik	0.81496	59.2091	245.34	0.82023	105.49	488.781	0.944265	48.5137	902.68	0.949122	26.2258	732.944	0.737247	158.354	788.277	0.927585	49.9121	1140.82	0.856405	113.056	970.948	0.874208	80.0514	872.305	0.780883	92.1366	606.181	0.958852	17.1116	604.467	0.915665	52.8187	848.333	0.594689	119.094	411.098	0.692256	98.6297	420.104	0.69374	123.13	356.548	0.770992	107.608	536.535
1810024B03Rik	1	0	0	0.99289	2.3975	96.2356	1	0	0	1	0	0	1	0	0	0.99632	2.37676	237.023	0.989685	4.71069	2234.96	0.995136	2.38959	204.96	0.990271	2.55935	71.22	1	0	0	1	0	0	0.958719	6.39043	144.321	0.968625	7.19925	122.699	0.981942	4.24586	431.842	0.956978	13.451	147.616
1810026J23Rik	0.88694	35.5255	194.939	0.908168	37.1613	462.953	0.900265	72.7705	851.232	0.936662	43.7097	742.894	0.928147	31.2541	273.309	0.909196	61.7959	605.703	0.931654	39.2557	491.261	0.968884	22.7012	568.57	0.93476	20.4748	565.222	0.901203	48.4829	420.34	0.938279	33.3592	382.082	0.870156	26.7236	140.776	0.878681	28.797	292.344	0.900549	33.9669	347.981	0.929398	25.6791	209.021
1810030O07Rik	0.958847	11.8418	294.195	0.975113	8.39126	850.108	1	0	0	1	0	0	0.994749	2.08361	672.043	0.974238	16.6374	351.015	0.983764	9.42137	580.193	0.985407	7.16878	525.546	0.980543	5.1187	113.271	0.958852	17.1116	430.988	0.989713	5.55986	278.708	0.94787	8.13328	397.418	0.951679	12.9586	151.206	0.92777	16.9834	455.072	0.968037	13.451	493.153
1810037I17Rik	0.830641	151.97	395.219	0.836447	233.757	719.512	0.971833	48.5137	725.337	0.971263	34.9678	1444.18	0.869708	152.103	835.529	0.944653	95.0706	1743.55	0.801675	475.779	1308.5	0.908393	149.35	1096.34	0.79672	250.816	983.442	0.970461	25.6674	1252.45	0.949511	91.7378	1058.38	0.417264	662.281	1021.89	0.574633	498.188	970.812	0.518937	528.61	1052.34	0.68756	484.234	1249.98
1810043G02Rik	0.947708	11.8418	126.563	0.957337	14.385	579.96	0.983377	12.1284	577.024	1	0	0	0.968494	12.5016	456.98	0.988959	7.13029	860.012	0.976943	12.5618	304.303	0.975678	11.948	395.347	0.970814	7.67805	725.546	0.958852	17.1116	565.531	0.989713	5.55986	711.128	0.920713	15.6856	126.66	0.926661	19.438	289.199	0.901776	21.2293	361.513	0.969759	9.78251	416.396
1810043H04Rik	0.766612	88.8136	415.701	0.785827	107.888	663.755	0.93351	48.5137	1007.74	0.966081	17.4839	316.675	0.825538	97.9295	614.092	0.94229	40.405	763.975	0.896505	83.2221	464.74	0.863674	96.7786	620.222	0.771488	94.696	376.1	0.910847	37.0752	588.118	0.915665	52.8187	798.72	0.55279	164.989	407.706	0.711919	101.509	352.769	0.6781	150.728	496.444	0.743553	140.624	627.271
1810055G02Rik	0.973854	5.92091	400.174	0.985779	4.79501	112.137	0.991689	6.06421	316.756	0.983041	8.74195	565.611	0.968494	12.5016	171.428	0.967994	23.7676	637.809	0.97937	9.42137	125.325	0.987839	5.97399	209.903	0.980543	5.1187	140.036	0.979426	8.55581	188.9	0.994857	2.77993	279.096	0.972069	5.22854	146.676	0.978037	5.03947	142.223	0.963885	8.49172	171.497	0.982151	7.33688	152.727
2010012O05Rik	0.891771	29.6045	181.593	0.878969	51.5463	386.304	0.958444	30.321	812.683	0.966081	17.4839	1430.5	0.928147	31.2541	329.967	0.935989	47.5353	986.496	0.914163	54.958	715.825	0.943148	31.0647	697.038	0.919629	30.7122	866.918	0.979426	8.55581	762.472	0.969139	16.6796	693.862	0.777574	49.3806	275.829	0.829145	55.4342	426.261	0.800403	59.4421	295.61	0.896642	42.7985	420.37
2010107E04Rik	0.699389	343.413	694.344	0.753719	419.563	961.608	0.894415	266.825	1814.64	0.944043	87.4195	2451.91	0.710528	560.49	1324.5	0.905831	180.634	1674.01	0.807908	433.383	1341.08	0.799831	470.75	1217.57	0.625118	481.158	914.716	0.862985	156.856	922.487	0.882424	219.615	1320.91	0.330642	860.385	1354.01	0.53886	682.489	1282.93	0.498457	817.328	1212.23	0.618291	742.248	1471.73
2010107G23Rik	0.965139	7.89454	101.563	0.969082	11.9875	216.163	0.991689	6.06421	801.925	0.966081	17.4839	507.178	0.984247	6.25082	429.221	0.992639	4.75353	1339.38	0.969055	14.1321	295.634	0.975678	11.948	737.136	0.93476	20.4748	189.328	0.986284	5.70387	1423.45	0.994857	2.77993	829.876	0.838675	33.1141	179.912	0.898472	25.9173	233.084	0.923658	23.3522	283.903	0.912672	33.016	551.524
2010111I01Rik	0.877986	27.6309	229.175	0.891391	44.3538	619.829	0.977113	24.2568	1772.52	0.983041	8.74195	225.785	0.906013	47.923	492.838	0.941394	49.9121	669.358	0.949518	25.1237	605.963	0.968382	15.5324	472.968	0.941628	15.3561	144.801	0.938279	25.6674	502.094	0.953709	25.0194	621.482	0.898143	18.5904	302.152	0.93688	17.2782	386.144	0.972914	6.36879	92.1398	0.95582	15.8966	621.899
2010300C02Rik	0.930278	15.7891	368.495	0.93554	26.3725	259.49	0.93351	48.5137	805.871	0.909168	78.6775	862.776	0.903439	43.7557	416.06	0.902954	68.9262	702.964	0.972493	12.5618	464.422	0.982975	8.36358	515.876	0.951357	12.7968	329.842	0.967617	17.1116	308.934	0.98457	8.3398	317.507	0.932255	11.619	140.28	0.946662	12.9586	134.242	0.92777	16.9834	219.316	0.969759	9.78251	165.463
2010315B03Rik	0.965139	7.89454	95.002	0.975113	8.39126	512.871	1	0	0	1	0	0	0.984247	6.25082	792.375	0.981598	11.8838	622.563	0.981063	12.5618	186.461	0.986974	10.7532	1290.17	0.951357	12.7968	409.091	0.96571	14.2597	391.998	0.969139	16.6796	235.205	0.942241	12.7809	210.503	0.941401	14.3985	174.929	0.918741	19.1064	300.351	0.96336	14.6738	461.178
2200002D01Rik	0.991285	1.97364	207.857	1	0	0	1	0	0	1	0	0	0.994749	2.08361	206.016	0.99632	2.37676	1675.04	0.993123	3.14046	643.53	0.997568	1.1948	1283.7	0.990271	2.55935	87.0928	0.993142	2.85194	106.701	0.994857	2.77993	113.469	0.843844	33.1141	304.199	0.919713	23.0376	274.646	0.936799	16.9834	143.123	0.934254	24.4563	371.885
2200002J24Rik	1	0	0	0.996445	1.19875	96.7961	1	0	0	1	0	0	0.994749	2.08361	843.882	0.99632	2.37676	171.321	0.996562	1.57023	91.7011	1	0	0	0.98395	12.7968	207.371	1	0	0	0.989713	5.55986	494.077	0.897012	34.276	367.679	0.928359	24.4774	365.202	0.916581	27.5981	404.32	0.916725	40.3529	668.933
2210013O21Rik	0.921562	17.7627	121.148	0.930109	31.1675	314.243	0.975066	18.1926	1873.13	0.966081	17.4839	326.956	0.924352	35.4213	251.46	0.933754	42.7818	872.558	0.905317	62.8091	842.614	0.958653	20.3116	652.188	0.925083	23.0342	363.797	0.979426	8.55581	217.325	0.955271	27.7993	932.066	0.611354	121.418	314.161	0.726804	87.8308	423.066	0.746167	78.5484	390.888	0.787453	90.4882	524.386
2210016F16Rik	0.839736	41.4464	279.232	0.89049	43.1551	434.547	0.950132	36.3852	1464.24	0.852515	87.4195	768.053	0.859147	66.6754	794.368	0.9223	59.4191	732.727	0.900655	61.2389	618.23	0.927837	37.0387	690.606	0.896001	30.7122	329.625	0.926689	34.2232	575.896	0.914211	50.0388	762.734	0.849443	31.3712	240.747	0.829714	56.8741	293.504	0.788788	65.8108	340.558	0.839483	74.5916	521.534
2210016L21Rik	0.917694	23.6836	262.027	0.912283	31.1675	639.401	0.983377	12.1284	451.704	0.983041	8.74195	397.456	0.933389	29.1705	522.807	0.988959	7.13029	734.464	0.954693	26.6939	528.484	0.941392	33.4543	492.964	0.925083	23.0342	484.468	0.96571	14.2597	1488.64	0.939886	36.1391	1104	0.775665	44.733	231.422	0.838397	48.9549	316.135	0.852216	33.9669	279.002	0.907843	39.13	744.882
2210018M11Rik	0.956424	9.86818	114.988	0.969082	11.9875	897.306	0.991689	6.06421	188.786	1	0	0	0.989498	4.16721	140.911	0.99632	2.37676	499.5	0.989685	4.71069	213.618	0.973246	13.1428	427.555	0.990271	2.55935	116.212	0.986284	5.70387	250.159	0.994857	2.77993	1047.12	0.939502	11.038	134.591	0.940387	14.3985	270.049	0.960248	16.9834	160.767	0.985882	6.11407	438.43
2210404O09Rik	0.991285	1.97364	2369.67	0.978669	7.19251	162.833	0.991689	6.06421	875.657	1	0	0	0.994749	2.08361	170.097	1	0	0	0.986247	6.28091	1231.62	0.997939	2.38959	1112.35	1	0	0	0.993142	2.85194	1464.13	1	0	0	0.957608	7.55233	200.064	0.978037	5.03947	204.683	0.959622	8.49172	178.402	0.98866	3.66844	324.144
2210408I21Rik	0.991285	1.97364	66.7646	0.97969	8.39126	355.442	0.983377	12.1284	1716.5	1	0	0	0.949103	22.9197	483.316	0.970557	19.0141	627.839	0.962178	17.2725	558.598	0.975678	11.948	341.093	0.961085	10.2374	154.097	0.979426	8.55581	398.392	0.98457	8.3398	829.207	0.921383	13.3618	133.718	0.965487	7.91917	237.444	0.959622	8.49172	250.896	0.938019	23.2335	486.072
2300009A05Rik	0.932887	17.7627	121.182	0.909023	38.3601	454.979	0.975066	18.1926	906.339	0.966081	17.4839	1042.61	0.931736	27.0869	579.912	0.944795	35.6515	792.987	0.899942	59.6687	509.54	0.95887	26.2855	636.78	0.912442	23.0342	519.631	0.96571	14.2597	508.932	0.974283	13.8997	324.233	0.716787	65.6472	306.333	0.852541	44.6353	393.487	0.8363	46.7045	273.266	0.847905	59.9179	431.916
2310003H01Rik	0.965139	7.89454	483.333	0.989334	3.59626	141.587	0.991689	6.06421	1675.04	0.983041	8.74195	252.08	0.975205	12.5016	663.696	0.981598	11.8838	547.511	0.982808	7.85114	201.165	0.987839	5.97399	286.227	0.980543	5.1187	104.18	1	0	0	0.994857	2.77993	1795.33	0.952847	7.55233	103.33	0.959212	9.35902	190.829	0.972914	6.36879	118.071	0.973539	8.5597	320.505
2310009B15Rik	0.874446	33.5518	411.555	0.922942	27.5713	277.884	0.966755	24.2568	1703.94	0.983041	8.74195	224.467	0.943867	25.0033	525.716	0.982622	14.2606	671.56	0.896086	81.6519	828.205	0.902739	58.5451	831.288	0.812469	71.6618	335.521	0.955517	25.6674	878.347	0.909016	66.7184	1161.57	0.609854	108.056	342.77	0.740805	87.1109	388.386	0.768957	70.0567	406.92	0.820641	88.0426	549.819
2310011J03Rik	0.910927	27.6309	283.571	0.878138	50.3476	531.574	0.95252	42.4495	1144.22	0.983041	8.74195	219.443	0.922905	33.3377	516.745	0.958765	35.6515	642.486	0.938458	36.1153	780.771	0.923868	46.5971	652.298	0.842915	51.187	280.602	0.924563	31.3713	410.304	0.958852	22.2395	1015.52	0.698649	81.3328	235.289	0.784168	68.3929	358.197	0.806569	65.8108	291.163	0.840167	75.8145	441.576
2310014L17Rik	0.965139	7.89454	258.193	0.939878	26.3725	417.9	0.944265	48.5137	809.632	0.983041	8.74195	852.515	0.94216	33.3377	308.087	0.977918	14.2606	470.916	0.976943	12.5618	302.366	0.97811	10.7532	444.038	0.970814	7.67805	418.512	0.979426	8.55581	192.469	0.958852	22.2395	299.783	0.932269	14.5237	175.305	0.942305	15.1184	300.357	0.936798	14.8605	394.442	0.971765	12.2281	144.903
2310022A10Rik	1	0	0	0.99289	2.3975	110.54	1	0	0	1	0	0	0.986239	10.418	313.039	0.992639	4.75353	741.597	0.980357	10.9916	902.36	0.985407	7.16878	1416.92	0.980543	5.1187	410.423	0.96571	14.2597	398.519	0.98457	8.3398	915.086	0.972069	5.22854	205.252	0.971762	6.47932	213.097	0.983881	6.36879	119.619	0.982151	7.33688	169.838
2310022B05Rik	0.982569	3.94727	111.157	0.99289	2.3975	128.179	1	0	0	1	0	0	0.989498	4.16721	280.956	0.996882	4.75353	256.542	0.982808	7.85114	126.733	0.969797	17.922	805.556	0.951357	12.7968	214.923	0.972568	11.4077	383.796	0.979426	11.1197	681.468	0.906883	15.6856	126.754	0.93688	17.2782	225.26	0.945827	14.8605	205.725	0.964502	11.0053	162.139
2310030G06Rik	0.861217	41.4464	424.989	0.891391	44.3538	440.426	0.958444	30.321	576.311	0.983041	8.74195	397.456	0.949103	22.9197	445.022	0.966877	21.3909	810.807	0.92562	43.9664	813.398	0.981833	11.948	556.568	0.91774	28.1529	566.751	0.979426	8.55581	252.689	0.989713	5.55986	968.741	0.783799	51.1235	292.829	0.875978	41.0357	264.731	0.809905	65.8108	370.33	0.921032	39.13	256.122
2310033P09Rik	0.744922	100.655	475.285	0.760929	115.08	516.983	0.950132	36.3852	1077.62	0.949122	26.2258	446.015	0.819675	112.515	519.576	0.9159	66.5494	617.059	0.885246	83.2221	713.112	0.904374	62.1295	797.98	0.820525	87.0179	374.693	0.929909	39.9271	894.289	0.938279	33.3592	637.795	0.763185	55.1901	283.148	0.816713	54.7143	219.11	0.808783	82.7943	309.232	0.763723	103.939	375.713
2310035C23Rik	0.915524	21.71	266.665	0.92534	25.1738	342.133	0.966755	24.2568	1143.06	0.932162	34.9678	324.555	0.883917	54.1738	550.847	0.905518	64.1726	588.248	0.93811	28.2641	261.235	0.950426	27.4803	729.304	0.931899	17.9155	458.172	0.945137	22.8155	268.312	0.919348	47.2588	597.291	0.847418	32.5331	138.389	0.88148	34.5564	225.807	0.885467	29.721	329.427	0.945543	20.7878	410.198
2310036O22Rik	0.773812	84.8664	481.473	0.750713	127.068	483.307	0.954226	48.5137	761.306	0.949122	26.2258	1017.05	0.867892	70.8426	423.431	0.906643	78.4332	1067.65	0.821594	149.172	834.098	0.862141	100.363	824.414	0.751069	97.2554	386.704	0.879989	71.2984	798.911	0.937303	44.4789	824.883	0.587064	153.37	307.292	0.675123	125.987	394.838	0.727778	137.99	354.505	0.785091	101.494	533.966
2310039H08Rik	0.790963	67.1036	536.806	0.820819	97.0989	569.508	0.950132	36.3852	891.101	0.939445	52.4517	1001.58	0.720888	214.612	741.641	0.907649	68.9262	905.401	0.840347	136.61	716.76	0.829858	160.103	689.041	0.696807	161.239	567.295	0.84157	77.0023	682.62	0.903955	69.4983	992.998	0.513849	202.751	447.986	0.670114	167.742	452.854	0.675402	142.236	507.635	0.738378	138.178	637.94
2310045N01Rik	0.982569	3.94727	115.112	0.957337	14.385	362.847	0.977113	24.2568	413.848	1	0	0	0.952741	18.7525	476.036	0.981598	11.8838	926.694	0.927409	39.2557	662.898	0.963517	17.922	570.524	0.941628	15.3561	299.63	0.972568	11.4077	309.551	0.974283	13.8997	1780.95	0.753331	53.4473	368.457	0.844582	48.235	366.778	0.854216	42.4586	355.484	0.867699	62.3635	661.951
2310047M10Rik	0.904132	21.71	404.95	0.90873	32.3663	339.694	0.975066	18.1926	821.326	0.983041	8.74195	361.925	0.960778	20.8361	960.605	0.945966	38.0282	784.009	0.941072	32.9748	611.755	0.931623	44.2075	513.161	0.805879	87.0179	452.136	0.875609	79.8542	718.914	0.905871	75.0582	596.271	0.687099	86.5613	263.562	0.796157	79.9117	434.974	0.749743	87.0401	312.311	0.88253	50.1354	443.273
2310057M21Rik	0.956424	9.86818	109.787	0.953782	15.5838	343.142	0.983377	12.1284	241.153	1	0	0	0.949103	22.9197	337.986	0.977918	14.2606	766.697	0.972493	12.5618	1240.7	0.990271	4.77919	690.304	0.990271	2.55935	550.964	0.96571	14.2597	517.972	0.98457	8.3398	317.237	0.956474	6.97138	125.365	0.963331	9.35902	493.912	0.954856	10.6147	210.245	0.974651	9.78251	470.752
2310061I04Rik	0.909065	25.6573	112.219	0.939561	20.3788	250.709	0.991689	6.06421	236.518	1	0	0	0.931736	27.0869	373.851	0.937434	40.405	761.399	0.931654	39.2557	619.245	0.956221	21.5064	488.421	0.908124	30.7122	450.297	0.958852	17.1116	185.579	0.958852	22.2395	1299.39	0.818776	37.1807	232.232	0.887735	30.2368	257.397	0.860946	42.4586	413.524	0.921845	26.9019	318.371
2310067B10Rik	0.880745	29.6045	217.119	0.93285	28.77	356.887	0.96896	30.321	1392.2	1	0	0	0.968494	12.5016	537.79	0.94964	35.6515	550.913	0.953885	25.1237	290.11	0.973246	13.1428	444.297	0.990271	2.55935	88.9284	0.945137	22.8155	403.052	0.979426	11.1197	248.759	0.915149	18.0094	180.833	0.899381	25.9173	250.651	0.954856	10.6147	98.0288	0.974651	9.78251	239.64
2410002F23Rik	0.88694	35.5255	319.269	0.874912	58.7388	399.062	0.941821	42.4495	1209.76	0.932162	34.9678	788.005	0.885216	56.2574	477.672	0.9103	64.1726	662.931	0.881043	72.2305	741.133	0.914794	52.5711	729.428	0.873527	33.2716	285.851	0.938279	25.6674	570.244	0.966638	25.0194	310.814	0.778954	49.9616	221.327	0.854953	43.1955	369.407	0.846511	40.3357	345.543	0.907012	39.13	417.147
2410004B18Rik	0.950212	13.8155	218.031	0.933599	23.975	359.157	0.950132	36.3852	1009.98	0.932162	34.9678	343.298	0.963243	14.5852	417.116	0.974238	16.6374	787.233	0.939216	29.8343	523.78	0.966719	17.922	661.192	0.888844	35.8309	208.389	0.987757	8.55581	246.718	0.979426	11.1197	656.927	0.758304	54.6092	190.607	0.855839	39.5959	263.854	0.83397	46.7045	333.893	0.917369	34.2388	319.349
2410015M20Rik	0.649711	369.07	807.982	0.782481	330.856	731.955	0.838339	485.137	1782.68	0.71259	620.678	1614.66	0.745705	425.056	1210.81	0.821599	366.022	1476.09	0.75352	584.125	1215.81	0.784193	470.75	1414.79	0.620441	583.532	1016.5	0.785461	276.638	1152.98	0.831456	333.592	1602	0.334681	927.775	1384.59	0.469061	969.019	1513.01	0.462399	980.794	1514.92	0.508281	1129.88	1885.37
2410016O06Rik	0.973854	5.92091	313.49	0.953782	15.5838	362.021	0.991689	6.06421	478.469	0.983041	8.74195	184.57	0.942239	22.9197	344.71	0.938615	42.7818	916.186	0.969055	14.1321	458.635	0.97811	10.7532	322.19	0.951357	12.7968	341.711	0.972568	11.4077	513.783	0.969139	16.6796	728.268	0.970983	4.64759	100.473	0.985185	4.31955	178.927	0.945827	12.7376	495.246	0.979181	9.78251	299.387
2410089E03Rik	0.956424	9.86818	222.015	0.975113	8.39126	354.314	0.966755	24.2568	830.725	0.983041	8.74195	988.142	0.978996	8.33443	181.056	0.992639	4.75353	349.85	0.986247	6.28091	198.601	0.980543	9.55838	330.28	0.97321	10.2374	287.216	0.986284	5.70387	1251.21	0.994857	2.77993	390.625	0.965938	5.22854	276.961	0.9749	5.7594	267.09	0.990971	2.12293	339.098	0.98866	3.66844	155.217
2410127L17Rik	0.891771	29.6045	200.047	0.905499	39.5588	428.05	0.950132	36.3852	1097.67	1	0	0	0.945211	27.0869	845.881	0.913972	61.7959	682.869	0.915419	48.6771	602.258	0.959433	21.5064	408.394	0.854069	38.3903	504.176	0.96571	14.2597	376.657	0.955271	27.7993	872.596	0.755428	55.7711	193.231	0.822914	53.2744	272.627	0.840288	53.0733	425.247	0.856144	52.581	640.585
2410131K14Rik	0.991285	1.97364	71.8649	0.971558	9.59001	326.405	0.966755	24.2568	1316.46	0.932162	34.9678	786.462	0.938629	27.0869	257.546	0.977918	14.2606	700.946	0.975931	10.9916	496.098	0.955275	25.0907	382.822	0.931899	17.9155	195.682	0.945137	22.8155	312.928	0.958852	22.2395	661.4	0.884664	21.4951	128.954	0.926661	19.438	238.669	0.918741	21.2293	289.642	0.952048	17.1194	242.381
2510002D24Rik	0.874322	45.3936	403.288	0.858821	67.1301	493.763	0.941821	42.4495	1211.43	0.966081	17.4839	486.571	0.929574	33.3377	741.325	0.982622	14.2606	689.376	0.947045	28.2641	587.312	0.963517	17.922	715.792	0.912442	23.0342	813.314	0.94719	25.6674	400.177	0.98457	8.3398	1248.64	0.763807	48.7997	201.243	0.829773	51.8346	368.658	0.825168	42.4586	300.708	0.875002	46.4669	250.675
2510003E04Rik	0.965139	7.89454	124.223	0.950227	16.7825	219.598	0.975066	18.1926	776.047	0.966081	17.4839	418.728	0.957992	16.6689	450.517	0.953314	33.2747	753.153	0.948425	23.5534	1034.47	0.97811	10.7532	510.841	0.941628	15.3561	465.55	0.94719	25.6674	442.75	0.969139	16.6796	513.032	0.957608	7.55233	108.066	0.93605	16.5583	163.858	0.907723	29.721	282.831	0.905497	31.7932	371.67
2510039O18Rik	0.893764	31.5782	172.762	0.926602	32.3663	483.373	0.93351	48.5137	969.468	0.847365	78.6775	654.72	0.933389	29.1705	413.029	0.9223	59.4191	669.825	0.929717	43.9664	506.801	0.97321	19.1168	455.051	0.941628	15.3561	88.4141	0.899313	45.631	329.776	0.927992	38.9191	460.174	0.84415	30.2093	160.444	0.876642	38.156	240.436	0.870237	29.721	270.828	0.952048	17.1194	522.822
2610002J02Rik	0.898141	25.6573	291.642	0.914329	33.5651	673.284	0.966755	24.2568	608.396	0.983041	8.74195	184.57	0.963243	14.5852	124.782	0.952155	30.8979	828.596	0.940198	31.4046	674.127	0.958653	20.3116	646.812	0.898491	33.2716	246.546	0.958852	17.1116	323.463	0.974283	13.8997	371.373	0.796714	51.1235	221.128	0.836317	47.515	247.867	0.863163	40.3357	331.243	0.892903	44.0213	590.993
2610002M06Rik	0.947708	11.8418	146.973	0.940701	21.5775	913.799	0.958444	30.321	686.207	0.969723	26.2258	1332.76	0.940004	29.1705	568.908	0.960657	28.5212	638.723	0.913722	45.5366	741.625	0.965546	21.5064	520.257	0.92217	20.4748	252.301	0.958852	17.1116	643.453	0.974283	13.8997	614.513	0.921383	13.9428	326.098	0.904738	23.7575	194.541	0.907723	31.844	224.154	0.962047	18.3422	487.182
2610008E11Rik	0.965139	7.89454	328.656	0.978669	7.19251	239.337	0.983377	12.1284	340.594	1	0	0	0.963243	14.5852	580.082	0.985279	9.50706	306.186	0.982808	7.85114	279.297	0.990271	4.77919	293.643	1	0	0	0.993142	2.85194	250.689	0.98457	8.3398	143.146	0.97461	4.06664	116.419	0.98745	2.8797	748.338	0.959058	14.8605	264.404	0.973539	8.5597	467.043
2610015P09Rik	0.965139	7.89454	443.567	0.961995	14.385	568	0.992958	12.1284	258.398	1	0	0	0.970002	14.5852	788.85	0.976128	21.3909	1046.08	0.961477	23.5534	1258.17	0.976425	13.1428	447.647	0.970814	7.67805	102.417	0.986284	5.70387	1057.09	0.98457	8.3398	1251.02	0.958558	8.13328	196.342	0.934112	15.1184	392.797	0.930473	21.2293	225.671	0.971765	13.451	258.248
2610034B18Rik	0.991285	1.97364	144.865	0.983212	7.19251	180.518	0.983377	12.1284	488.666	1	0	0	0.989498	4.16721	965.64	0.992639	4.75353	1233.16	0.993123	3.14046	101.73	0.997568	1.1948	89.2061	1	0	0	1	0	0	1	0	0	0.916206	15.6856	286.873	0.931996	16.5583	149.835	0.897243	23.3522	142.88	0.935738	22.0106	348.038
2610044O15Rik8	0.982569	3.94727	322.468	0.986722	5.99376	289.605	1	0	0	1	0	0	0.984247	6.25082	1501.49	0.99632	2.37676	250.815	0.969055	14.1321	521.039	0.98369	9.55838	655.147	0.970814	7.67805	132.851	1	0	0	0.98457	8.3398	953.78	0.921383	13.3618	178.262	0.947669	12.9586	254.907	0.972914	6.36879	481.617	0.954638	15.8966	280.13
2610301B20Rik	0.991285	1.97364	97.1628	0.985779	4.79501	334.14	1	0	0	0.983041	8.74195	397.456	0.964787	16.6689	361.658	0.977918	14.2606	991.804	0.965616	15.7023	911.546	0.968382	15.5324	438.595	0.970814	7.67805	221.253	0.979426	8.55581	465.725	0.985836	11.1197	315.125	0.950368	8.71423	176.987	0.950803	12.2387	361.195	0.945827	12.7376	319.558	0.958418	13.451	310.616
2610507B11Rik	0.912847	19.7364	193.274	0.878969	51.5463	572.704	0.935998	54.5779	1276.57	0.966081	17.4839	489.713	0.909838	56.2574	394.408	0.838959	116.461	757.664	0.899183	58.0985	599.8	0.854964	89.6098	554.972	0.911769	35.8309	225.25	0.763237	116.929	503.638	0.882555	94.5177	702.526	0.798242	44.733	140.623	0.873548	38.8759	277.228	0.903483	27.5981	189.148	0.962625	19.565	950.642
2610524H06Rik	0.811468	55.2618	347.137	0.862181	58.7388	546.222	0.784297	260.761	871.449	0.599594	262.258	658.974	0.84777	93.7623	751.28	0.891931	76.0565	824.248	0.910112	54.958	553.649	0.873794	86.0254	717.372	0.720807	102.374	468.364	0.809772	131.189	623.046	0.819984	138.997	725.737	0.763879	64.4853	198.247	0.783449	71.2726	333.238	0.775483	91.286	560.211	0.837259	70.9232	551.723
2610528J11Rik	0.932887	17.7627	188.139	0.917868	32.3663	236.11	0.983377	12.1284	1230.23	0.949122	26.2258	625.09	0.942239	22.9197	265.056	0.97532	19.0141	454.468	0.963244	18.8427	748.057	0.997568	1.1948	284.414	0.990271	2.55935	259.067	0.993142	2.85194	461.255	0.989713	5.55986	209.383	0.895493	19.7522	187.871	0.900076	30.9568	259.025	0.900683	23.3522	477.343	0.921845	28.1247	245.142
2700029M09Rik	0.900423	27.6309	343.647	0.892055	39.5588	420.787	0.950132	36.3852	1381.74	0.969723	26.2258	457.334	0.868236	60.4246	571.63	0.94964	35.6515	974.586	0.926998	47.1069	951.138	0.922974	39.4283	670.714	0.852555	48.6277	562.821	0.96571	14.2597	692.484	0.931017	44.4789	925.539	0.799984	40.0854	166.211	0.827326	53.9944	407.212	0.797961	53.0733	372.801	0.892025	42.7985	450.281
2700049A03Rik	0.973854	5.92091	505.809	0.985779	4.79501	818.496	0.991689	6.06421	364.431	1	0	0	0.978996	8.33443	726.511	0.99632	2.37676	411.353	0.986247	6.28091	104.45	0.985407	7.16878	671.531	1	0	0	0.979426	8.55581	525.616	1	0	0	0.981864	2.90474	185.089	0.961038	10.7989	268.661	0.975137	8.49172	133.809	0.973539	8.5597	680.799
2700060E02Rik	0.808219	153.944	424.131	0.847619	207.384	903.154	0.958206	78.8347	1623.67	1	0	0	0.770996	283.371	985.77	0.930242	71.3029	1235.74	0.815794	218.262	1205.37	0.889696	162.492	1183.31	0.708309	299.444	674.873	0.982028	14.2597	1468.61	0.933939	77.8381	876.473	0.493741	307.903	660.257	0.713001	236.855	664.326	0.556092	288.719	768.353	0.700783	265.351	864.109
2700062C07Rik	0.904132	21.71	778.463	0.927535	27.5713	251.431	0.958444	30.321	737.841	0.949122	26.2258	600.352	0.933389	29.1705	589.056	0.952155	30.8979	954.1	0.907416	58.0985	832.253	0.953487	27.4803	601.085	0.875535	48.6277	325.433	0.96571	14.2597	585.887	0.970617	19.4595	1110.02	0.875673	24.9808	281.51	0.896981	31.6767	308.884	0.894616	42.4586	420.692	0.881452	41.5757	292.568
2700089E24Rik	0.831049	43.42	240.349	0.814114	83.9126	444.454	0.966755	24.2568	1694.51	0.983041	8.74195	583.431	0.868236	60.4246	560.509	0.933272	52.2888	554.299	0.914163	54.958	459.156	0.909869	48.9867	543.837	0.762077	97.2554	395.548	0.917705	34.2232	507.396	0.938279	33.3592	1037.49	0.622218	134.78	297.551	0.701228	106.549	376.545	0.691182	106.147	341.277	0.799045	81.9285	510.598
2700094K13Rik	0.872043	31.5782	383.537	0.877716	56.3413	526.629	0.975066	18.1926	781.57	0.983041	8.74195	225.785	0.903439	43.7557	427.373	0.981598	11.8838	1140	0.949298	32.9748	376.027	0.923284	45.4023	880.36	0.883328	43.509	315.777	0.945137	22.8155	870.35	0.965508	22.2395	887.057	0.647333	90.628	329.99	0.829273	61.1936	388.485	0.751372	87.0401	394.809	0.843918	67.2548	563.352
2700097O09Rik	0.973854	5.92091	413.348	0.953782	15.5838	396.291	1	0	0	1	0	0	0.994749	2.08361	589.275	0.974238	16.6374	743.541	0.982808	7.85114	324.831	0.990271	4.77919	774.42	0.980543	5.1187	740.303	0.993142	2.85194	181.422	0.989713	5.55986	177.055	0.957608	7.55233	162.9	0.965487	7.91917	444.53	0.945827	12.7376	119.235	0.953057	18.3422	950.294
2810004N23Rik	0.865774	35.5255	211.753	0.868404	55.1426	443.314	0.966755	24.2568	1754.07	0.949122	26.2258	595.469	0.930807	35.4213	433.975	0.971659	21.3909	582.747	0.953885	25.1237	648.031	0.940722	32.2595	640.663	0.936897	23.0342	565.41	0.94719	25.6674	916.344	0.958852	22.2395	940.243	0.77381	53.4473	345.808	0.755791	77.7519	370.175	0.775757	65.8108	538.364	0.826074	90.4882	594.922
2810006K23Rik	0.934903	19.7364	235.832	0.968003	10.7888	364.202	1	0	0	1	0	0	0.980389	10.418	315.747	0.982622	14.2606	1227.17	0.970099	15.7023	591.072	0.97811	10.7532	508.679	0.951357	12.7968	448.01	0.993142	2.85194	250.689	0.994857	2.77993	791.139	0.921383	13.3618	201.087	0.9548	12.2387	284.68	0.92777	19.1064	189.862	0.944501	19.565	414.327
2810403A07Rik	0.895417	23.6836	240.128	0.930047	25.1738	422.218	0.991689	6.06421	1278.77	1	0	0	0.924352	35.4213	466.591	0.914977	64.1726	514.255	0.959354	28.2641	344.85	0.961862	20.3116	360.067	0.93476	20.4748	417.886	0.967617	17.1116	737.686	0.965508	22.2395	750.799	0.906311	18.0094	181.889	0.903773	23.7575	275.958	0.909712	21.2293	172.533	0.960558	15.8966	387.119
2810408A11Rik	0.956424	9.86818	126.386	1	0	0	1	0	0	0.983041	8.74195	187.196	0.994749	2.08361	1879.7	0.989865	9.50706	1091.93	0.962178	17.2725	640.506	0.986106	8.36358	547.685	0.951357	12.7968	274.95	0.993142	2.85194	202.922	0.994857	2.77993	541.712	0.860197	29.6284	135.46	0.903169	29.5169	209.186	0.885467	31.844	319.254	0.927709	29.3475	383.328
2810408M09Rik	0.973854	5.92091	138.405	0.989334	3.59626	310.285	1	0	0	0.983041	8.74195	423.549	0.952741	18.7525	412.086	0.988959	7.13029	675.46	0.965616	15.7023	611.091	0.97811	10.7532	297.813	0.941628	15.3561	669.163	0.993142	2.85194	226.347	0.979426	11.1197	774.414	0.956474	6.97138	196.969	0.924395	20.8778	283.538	0.954856	10.6147	289.432	0.953211	14.6738	373.709
2810428I15Rik	0.816415	102.629	482.253	0.776667	133.061	836.583	0.890482	103.092	1030.07	0.915203	43.7097	447.386	0.782203	137.518	822.45	0.912247	68.9262	884.724	0.832846	122.478	949.879	0.839644	123.064	949.236	0.671246	148.442	540.14	0.885615	51.3348	476.373	0.880709	88.9578	932.222	0.558979	134.199	328.473	0.682904	141.825	421.067	0.660296	135.868	449.171	0.761155	133.287	698.275
2810459M11Rik	0.847486	49.3409	377.349	0.910151	47.9501	384.622	0.977113	24.2568	1086.56	1	0	0	0.978996	8.33443	248.844	1	0	0	1	0	0	1	0	0	1	0	0	1	0	0	1	0	0	1	0	0	0.997342	1.43985	171.497	1	0	0	1	0	0
2810474O19Rik	0.834807	140.128	1001.9	0.863931	89.9064	768.193	0.991689	6.06421	203.128	1	0	0	0.903902	56.2574	583.211	0.821902	235.3	825.408	0.856502	117.767	615.14	0.859898	145.765	774.904	0.862186	46.0683	342.426	0.894977	99.8178	710.467	0.885562	108.417	785.199	0.80967	52.2854	160.582	0.805695	72.7124	344.104	0.863566	55.1962	435.817	0.940726	22.0106	427.681
2900026A02Rik	1	0	0	0.964448	11.9875	616.364	0.991689	6.06421	686.342	0.966081	17.4839	346.35	0.98554	8.33443	450.88	0.978975	16.6374	762.28	0.971595	18.8427	194.303	0.982975	8.36358	370.035	0.990271	2.55935	88.9284	0.986284	5.70387	328.351	0.98457	8.3398	808.45	0.985491	2.32379	107.399	0.996862	0.719925	142.45	7.81003e-13	2.12293	68.1989	0.99622	1.22281	96.9368
3010026O09Rik	0.967451	9.86818	121.002	0.983878	8.39126	298.641	1	0	0	1	0	0	0.989498	4.16721	609.13	0.992639	4.75353	304.137	0.975931	10.9916	175.707	0.980543	9.55838	932.997	0.970814	7.67805	252.224	1	0	0	1	0	0	0.937836	12.1999	151.528	0.9498	11.5188	226.198	0.885467	29.721	263.833	0.947078	17.1194	520.225
3110001I22Rik	1	0	0	0.972623	10.7888	138.37	0.991689	6.06421	2227.17	1	0	0	0.973745	10.418	303.212	0.992639	4.75353	373.762	0.993123	3.14046	1401.2	0.987839	5.97399	690.78	0.990271	2.55935	414.766	0.979426	8.55581	313.881	0.994857	2.77993	1618.12	0.986454	2.90474	568.601	0.978037	5.03947	366.357	0.99235	4.24586	378.86	1	0	0
3110002H16Rik	0.982569	3.94727	86.8639	0.954901	16.7825	351.906	0.991689	6.06421	1182.03	0.983041	8.74195	2024.29	0.98554	8.33443	865.709	0.981598	11.8838	732.335	0.993123	3.14046	309.438	0.985407	7.16878	798.838	0.990271	2.55935	663.57	0.993142	2.85194	791.766	0.98457	8.3398	612.054	0.958558	8.13328	137.321	0.959212	9.35902	286.267	0.963885	8.49172	149.24	0.964502	11.0053	458.142
3110009E18Rik	0.982569	3.94727	203.027	0.978669	7.19251	487.827	1	0	0	1	0	0	0.984247	6.25082	198.215	0.99632	2.37676	616.903	0.996562	1.57023	182.482	0.995136	2.38959	1017.25	0.961085	10.2374	321.887	1	0	0	1	0	0	0.952847	7.55233	272.118	0.959298	12.9586	347.797	0.963885	8.49172	838.713	0.98866	3.66844	935.058
3110040N11Rik	0.967451	9.86818	163.557	0.944252	20.3788	599.116	0.966755	24.2568	964.106	0.985631	17.4839	847.099	0.952741	18.7525	494.922	0.974238	16.6374	837.236	0.93811	28.2641	160.23	0.954062	28.6751	404.053	0.92217	20.4748	337.474	0.96223	22.8155	257.988	0.979426	11.1197	311.668	0.745946	48.7997	305.494	0.790933	66.953	346.403	0.851958	42.4586	270.262	0.876664	53.8038	401.545
3110043O21Rik	0.956424	9.86818	187.019	0.973445	11.9875	440.075	1	0	0	0.966081	17.4839	421.037	0.973745	10.418	212.228	0.992639	4.75353	391.807	0.986247	6.28091	285.588	0.995136	2.38959	195.387	0.990271	2.55935	553.403	1	0	0	0.98457	8.3398	332.418	0.937009	9.87612	127.359	0.981175	4.31955	208.727	0.942035	12.7376	186.935	0.98866	3.66844	192.279
3110052M02Rik	0.982569	3.94727	143.33	0.982224	5.99376	564.299	0.991689	6.06421	129.199	1	0	0	0.990625	6.25082	353.368	0.992639	4.75353	1531.9	0.975931	10.9916	775.21	0.992703	3.58439	787.084	0.990271	2.55935	124.719	1	0	0	0.994857	2.77993	522.466	0.952847	7.55233	246.117	0.981175	4.31955	185.835	0.972914	6.36879	404.755	0.99622	1.22281	85.3606
3110062M04Rik	0.938993	13.8155	349.679	0.97969	8.39126	1277.64	1	0	0	1	0	0	0.973745	10.418	387.46	0.992639	4.75353	724.54	0.97937	9.42137	275.903	0.985407	7.16878	566.398	0.961085	10.2374	195.49	0.993142	2.85194	200.884	0.994857	2.77993	131.822	0.950368	8.71423	136.939	0.968625	7.19925	505.432	0.915213	19.1064	307.365	0.953057	18.3422	520.463
3110082I17Rik	0.938993	13.8155	396.789	0.982224	5.99376	1212.77	1	0	0	1	0	0	0.984247	6.25082	137.417	0.99632	2.37676	230.203	0.989685	4.71069	186.541	0.997568	1.1948	176.991	0.970814	7.67805	124.796	1	0	0	1	0	0	0.957608	7.55233	371.599	0.968625	7.19925	396.684	0.981942	4.24586	97.2082	0.99622	1.22281	259.403
3830406C13Rik	0.930278	15.7891	818.469	0.879871	46.7513	613.175	0.950132	36.3852	1299.95	0.983041	8.74195	311.526	0.949103	22.9197	362.371	0.970557	19.0141	793.796	0.948635	31.4046	620.185	0.947284	27.4803	710.937	0.898491	33.2716	295.484	0.986284	5.70387	978.261	0.969139	16.6796	551.571	0.708553	73.7805	259.361	0.83393	48.9549	373.911	0.765252	57.3191	314.421	0.852585	58.6951	445.684
4430402I18Rik	0.965139	7.89454	132.793	0.978669	7.19251	870.593	0.991689	6.06421	2298.85	0.983041	8.74195	593.472	0.984247	6.25082	148.319	0.977918	14.2606	585.408	0.990532	6.28091	716.173	0.977031	14.3376	858.504	0.990271	2.55935	295.508	0.979426	8.55581	570.568	0.994857	2.77993	976.562	0.996373	0.580948	269.978	1	0	0	1	0	0	0.99622	1.22281	75.9821
4833420G17Rik	0.924209	19.7364	214.207	0.881403	43.1551	606.617	0.983377	12.1284	306.833	1	0	0	0.924352	35.4213	818.219	0.952155	30.8979	593.296	0.948425	23.5534	504.428	0.954574	23.8959	558.27	0.941628	15.3561	331.891	0.945137	22.8155	442.552	0.960392	25.0194	1315.32	0.871169	24.3998	210.489	0.901605	24.4774	403.236	0.923658	23.3522	274.606	0.905146	36.6844	508.925
4833439L19Rik	0.845503	61.1827	343.017	0.825303	81.5151	408.428	0.950132	36.3852	821.644	1	0	0	0.872018	56.2574	477.04	0.889312	80.81	636.419	0.831416	130.329	707.231	0.939593	35.8439	565.957	0.876588	35.8309	439.363	0.951994	19.9636	287.352	0.953709	25.0194	647.463	0.720389	69.7138	240.573	0.8335	51.8346	320.092	0.80713	44.5815	261.277	0.855418	56.2494	624.506
4921524J17Rik	0.883112	31.5782	359.535	0.903808	51.5463	558.086	0.96896	30.321	1129.04	0.966081	17.4839	507.178	0.954335	20.8361	208.15	0.97532	19.0141	936.754	0.963244	18.8427	931.95	0.968382	15.5324	469.849	0.910114	30.7122	659.479	0.993142	2.85194	106.701	0.966638	25.0194	875.149	0.832316	34.8569	305.792	0.852721	40.3158	300.21	0.852216	36.0898	271.748	0.87418	51.3582	538.493
4930426D05Rik	1	0	0	1	0	0	0.991689	6.06421	1862.2	1	0	0	0.848705	70.8426	483.489	0.865293	128.345	869.299	0.891546	59.6687	530.958	0.902767	82.441	737.427	0.888844	35.8309	527.585	0.917705	34.2232	749.841	0.914071	63.9384	578.268	0.795276	42.9902	238.154	0.840138	46.7951	288.473	0.863163	40.3357	392.904	0.929412	30.5703	383.737
4930430F08Rik	0.965139	7.89454	694.28	0.964448	11.9875	469.225	0.991689	6.06421	478.469	1	0	0	0.989498	4.16721	579.255	1	0	0	0.996562	1.57023	2020.2	0.997568	1.1948	854.701	0.961085	10.2374	229.061	0.993142	2.85194	323.311	0.994857	2.77993	368.868	0.958719	6.39043	204.188	0.965487	8.6391	588.99	0.963885	8.49172	116.513	0.974651	9.78251	161.575
4930453N24Rik	0.947708	11.8418	383.779	0.958448	15.5838	456.216	0.991689	6.06421	2257.34	0.983041	8.74195	789.889	0.963243	14.5852	306.754	0.982622	14.2606	1140.48	0.948425	23.5534	688.29	0.969797	17.922	591.713	0.892984	28.1529	515.611	0.972568	11.4077	669.37	0.98457	8.3398	313.633	0.83423	32.5331	317.769	0.866771	43.1955	371.625	0.845261	46.7045	214.125	0.931958	22.0106	331.83
4930503B20Rik	0.991285	1.97364	71.8649	0.993653	3.59626	111.442	0.991689	6.06421	316.756	1	0	0	0.973745	10.418	290.947	0.992639	4.75353	572.999	0.986247	6.28091	359.355	0.96738	19.1168	768.819	0.92217	20.4748	246.041	0.96571	14.2597	580.915	0.98457	8.3398	858.263	0.989118	1.74285	125.922	0.982076	5.03947	149.468	0.959622	8.49172	164.026	0.99244	2.44563	137.341
4930506M07Rik	1	0	0	0.99289	2.3975	73.065	1	0	0	1	0	0	0.989498	4.16721	322.402	0.970557	19.0141	580.887	0.97937	9.42137	608.147	0.982975	8.36358	659.422	0.961085	10.2374	184.685	0.986284	5.70387	850.361	0.989713	5.55986	741.355	0.980024	4.64759	151.879	0.971762	6.47932	276.814	0.981942	4.24586	222.761	0.99622	1.22281	238.379
4930523C07Rik	1	0	0	0.967152	15.5838	507.893	0.983377	12.1284	1522.04	0.983041	8.74195	230.362	0.975205	12.5016	993.157	0.977918	14.2606	973.456	0.975931	10.9916	724.547	0.972211	16.7272	1074.74	0.951357	12.7968	683.106	0.979426	8.55581	180.006	0.945017	33.3592	1490.39	0.980023	4.64759	983.16	0.95313	14.3985	1136.69	0.939454	16.9834	928.847	0.969759	9.78251	1263.31
4931406C07Rik	0.930278	15.7891	410.356	0.954901	16.7825	274.485	0.983377	12.1284	1172.09	0.983041	8.74195	286.205	0.938629	27.0869	458.165	0.977918	14.2606	794.462	0.952951	23.5534	672.343	0.969797	17.922	644.864	0.963667	12.7968	507.088	0.993142	2.85194	181.422	0.989713	5.55986	131.399	0.851103	26.7236	195.983	0.927518	19.438	309.31	0.860947	38.2127	458.239	0.91429	29.3475	516.965
4931406P16Rik	0.982569	3.94727	92.8865	0.946671	17.9813	395.144	1	0	0	1	0	0	0.959564	18.7525	527.298	0.974238	16.6374	499.984	0.975931	10.9916	382.949	0.956221	21.5064	393.662	0.955885	17.9155	139.932	0.96571	14.2597	289.145	0.951426	33.3592	968.943	0.915149	18.0094	139.399	0.916604	24.4774	205.375	0.942955	21.2293	440.029	0.96336	14.6738	168.512
4932438A13Rik	0.900423	27.6309	368.945	0.884001	52.7451	513.261	0.960755	36.3852	712.244	0.932162	34.9678	314.252	0.864366	64.5918	352.852	0.796652	187.764	790.358	0.89523	67.5198	636.092	0.937177	37.0387	560.005	0.944422	17.9155	475.161	0.851647	79.8542	392.567	0.887568	75.0582	996.91	0.727548	72.6186	188.36	0.74729	102.949	362.973	0.764422	93.4089	297.558	0.872942	56.2494	346.107
4932438H23Rik	0.788155	76.9718	350.457	0.793924	128.266	876.961	0.939435	66.7063	1621.12	0.955327	69.9356	781.431	0.87585	75.0098	840.814	0.923908	52.2888	1335.07	0.900655	61.2389	990.081	0.970353	19.1168	763.791	0.961085	10.2374	90.9225	0.926689	34.2232	683.965	0.960392	25.0194	1138.38	0.903588	19.7522	319.583	0.937732	29.5169	451.091	0.950888	10.6147	364.681	0.968772	14.6738	922.196
4933426M11Rik	0.915524	21.71	234.228	0.909023	38.3601	368.399	0.975066	18.1926	288.107	0.898243	52.4517	677.49	0.936987	25.0033	377.42	0.873553	87.9403	667.705	0.922039	37.6855	496.503	0.924603	37.0387	665.936	0.931899	17.9155	446.492	0.916404	45.631	300.272	0.936128	41.699	608.295	0.839541	36.5998	170.47	0.865566	42.4756	295.005	0.92777	16.9834	311.523	0.938964	25.6791	165.711
4933427D14Rik	0.982569	3.94727	397.509	0.982224	5.99376	716.848	1	0	0	0.983041	8.74195	600.24	0.970002	14.5852	555.608	0.977918	14.2606	483.938	0.982808	7.85114	405.399	0.995136	2.38959	121.374	0.990271	2.55935	389.56	0.993142	2.85194	2347.42	0.994857	2.77993	228.938	0.972907	5.80948	187.919	0.9602	10.0789	187.121	0.972914	6.36879	313.503	0.983095	4.89126	237.96
4933434E20Rik	0.831049	43.42	373.157	0.821112	81.5151	483.209	0.917826	97.0273	961.366	0.949122	26.2258	573.89	0.828671	91.6787	748.048	0.87294	97.4474	765.164	0.874263	75.371	729.87	0.872328	82.441	813.387	0.730342	99.8147	381.671	0.848394	74.1503	491.146	0.852394	111.197	778.764	0.674538	95.8565	254.178	0.734278	92.8703	476.948	0.792674	89.1631	492.12	0.820639	73.3688	420.28
5031439G07Rik	0.921562	17.7627	184.47	0.921032	37.1613	420.283	0.975066	18.1926	966.234	0.983041	8.74195	274.499	0.963243	14.5852	281.495	0.960657	28.5212	585.271	0.97937	9.42137	207.662	0.968448	21.5064	412.537	0.982632	7.67805	199.816	0.958852	17.1116	586.48	0.960392	25.0194	754.169	0.96233	5.80948	92.0927	0.959212	9.35902	120.096	0.975137	8.49172	124.976	0.98866	3.66844	154.298
5730455P16Rik	0.973854	5.92091	124.122	0.968003	10.7888	268.071	0.991689	6.06421	242.777	1	0	0	0.968494	12.5016	545.6	0.99632	2.37676	250.815	0.989685	4.71069	892.669	0.992703	3.58439	870.109	0.954062	15.3561	386.367	1	0	0	1	0	0	0.896007	18.0094	118.702	0.929028	20.8778	312.718	0.92777	16.9834	356.897	0.964301	14.6738	771.626
5730508B09Rik	0.976	7.89454	270.232	0.985779	4.79501	187.606	0.983377	12.1284	967.238	1	0	0	0.978996	8.33443	205.439	0.985279	9.50706	639.812	0.993862	4.71069	160.803	0.988971	8.36358	452.097	0.980543	5.1187	399.644	0.986284	5.70387	518.572	0.98457	8.3398	258.281	0.851352	29.6284	132.733	0.917314	24.4774	343.562	0.990971	2.12293	435.35	0.947078	18.3422	207.852
5730559C18Rik	1	0	0	1	0	0	1	0	0	1	0	0	0.96594	18.7525	392.529	0.966877	21.3909	863.317	0.969055	14.1321	654.571	0.961862	20.3116	255.626	0.963667	12.7968	218.065	0.96571	14.2597	588.508	0.979426	11.1197	1143.02	0.897114	18.5904	143.488	0.933761	17.9981	378.344	0.957367	12.7376	115.581	0.941782	23.2335	242.335
5830403L16Rik	0.932355	213.153	2600.31	0.745975	1134.02	4286.27	0.986289	30.321	2384.92	1	0	0	0.995551	4.16721	3623.19	1	0	0	1	0	0	1	0	0	1	0	0	1	0	0	1	0	0	1	0	0	1	0	0	1	0	0	1	0	0
5830418K08Rik	0.965139	7.89454	294.64	0.978669	7.19251	396.582	0.975066	18.1926	1090.6	1	0	0	0.959564	18.7525	624.705	0.986255	11.8838	499.099	0.983764	9.42137	339.637	0.987839	5.97399	441.832	0.980543	5.1187	365.701	0.986284	5.70387	174.795	0.969139	16.6796	451.351	0.927457	11.619	110.878	0.961038	10.7989	392.164	0.950274	16.9834	204.61	0.969759	9.78251	167.916
6030458C11Rik	0.956424	9.86818	224.386	0.964448	11.9875	373.253	1	0	0	0.983041	8.74195	1035.2	0.952741	18.7525	468.694	0.981598	11.8838	696.292	0.986247	6.28091	198.873	0.98369	9.55838	712.561	0.961085	10.2374	208.902	0.96571	14.2597	655.749	0.979426	11.1197	309.201	0.932269	14.5237	182.986	0.89868	28.797	233.619	0.942035	12.7376	402.381	0.958418	13.451	346.758
6330416G13Rik	0.930278	15.7891	210.388	0.93285	28.77	473.756	0.983377	12.1284	401.324	0.983041	8.74195	230.362	0.978996	8.33443	226.258	0.985279	9.50706	626.974	0.975931	10.9916	637.405	0.988971	8.36358	620.563	0.963667	12.7968	109.245	0.993142	2.85194	323.311	0.989713	5.55986	543.01	0.989118	1.74285	103.946	0.972715	7.19925	187.553	0.990971	2.12293	114.286	0.99622	1.22281	522.193
6430548M08Rik	0.958847	11.8418	236.717	0.959379	16.7825	437.416	0.975066	18.1926	756.729	1	0	0	0.951484	27.0869	890.124	0.956986	30.8979	678.513	0.97937	9.42137	776.071	0.964962	20.3116	422.569	1	0	0	0.929909	39.9271	420.746	0.974283	13.8997	1111.91	0.981864	2.90474	82.4456	0.98745	2.8797	193.124	0.990971	2.12293	98.6388	0.99622	1.22281	68.362
8430419L09Rik	1	0	0	0.99289	2.3975	204.9	1	0	0	0.983041	8.74195	230.362	0.989498	4.16721	243.159	0.971659	21.3909	911.293	0.974318	15.7023	300.642	0.971574	15.5324	279.252	0.963667	12.7968	270.713	0.951994	19.9636	419.785	0.969139	16.6796	262.491	0.925007	12.7809	106.61	0.91502	22.3177	216.418	0.924179	16.9834	149.916	0.960558	17.1194	215.488
9030624J02Rik	0.982569	3.94727	207.226	0.971558	9.59001	206.394	0.975066	18.1926	1506.16	0.983041	8.74195	2512.56	0.957992	16.6689	306.201	0.988959	7.13029	1181.93	0.973523	14.1321	870.723	0.982975	8.36358	707.294	0.970814	7.67805	77.6858	0.972568	11.4077	224.094	0.989713	5.55986	278.168	0.940526	11.038	171.377	0.950803	12.2387	233.652	0.963885	8.49172	128.061	0.962199	12.2281	870.499
9130011E15Rik	0.973854	5.92091	195.226	0.99289	2.3975	152.493	0.991689	6.06421	173.913	0.983041	8.74195	389.712	0.984247	6.25082	121.355	0.986255	11.8838	426.874	0.972493	12.5618	745.63	0.987839	5.97399	700.658	0.97321	10.2374	199.248	1	0	0	0.969139	16.6796	896.67	0.953988	8.13328	105.937	0.961038	10.7989	220.766	0.963885	8.49172	175.357	0.981099	6.11407	114.675
9130401M01Rik	0.965139	7.89454	194.845	0.940701	21.5775	388.17	0.958444	30.321	753.259	0.983041	8.74195	663.57	0.964787	16.6689	713.979	0.981598	11.8838	1109.86	0.952951	23.5534	690.022	0.973246	13.1428	409.852	0.915396	25.5935	636.629	0.958852	17.1116	363.503	0.974283	13.8997	434.38	0.813509	37.1807	144.583	0.897111	28.0771	238.217	0.932561	21.2293	147.057	0.925622	25.6791	488.34
9230104L09Rik	0.104637	13089.2	12104.9	0.469162	7534.16	10826.7	0.97344	127.348	10397.1	0.986452	43.7097	1948.56	0.987323	22.9197	2372.76	1	0	0	1	0	0	0.997568	1.1948	410.846	1	0	0	1	0	0	0.994857	2.77993	407.332	0.970611	6.97138	1049.9	0.975839	6.47932	209.234	0.963885	10.6147	116.11	0.981099	6.11407	103.204
9230110F15Rik	0.197761	5275.53	6515.32	0.628837	2345.96	4588.59	0.972577	60.6421	4217.13	1	0	0	0.991337	10.418	1582.24	1	0	0	1	0	0	1	0	0	1	0	0	1	0	0	1	0	0	1	0	0	1	0	0	1	0	0	1	0	0
9230112D13Rik	1	0	0	1	0	0	1	0	0	1	0	0	1	0	0	1	0	0	0.996562	1.57023	1858.74	0.982975	8.36358	603.049	0.961085	10.2374	315.934	0.99419	5.70387	1241.46	0.994857	2.77993	168.379	0.960101	6.39043	224.236	0.972715	7.19925	226.917	0.981942	4.24586	78.1428	0.978405	8.5597	511.146
9430015G10Rik	0.982569	3.94727	155.402	0.978669	7.19251	304.275	1	0	0	1	0	0	0.973745	10.418	318.143	0.988959	7.13029	1007.47	0.997087	3.14046	152.114	0.985407	7.16878	294.224	1	0	0	0.972568	11.4077	244.797	0.989713	5.55986	1475.13	0.970983	4.64759	268.062	0.959212	9.35902	287.067	0.972914	6.36879	591.431	0.993251	3.66844	524.851
9430016H08Rik	0.947708	11.8418	368.891	0.96554	13.1863	598.033	0.983377	12.1284	849.06	0.932162	34.9678	800.625	0.986239	10.418	160.768	0.966877	21.3909	1060.75	0.967529	18.8427	764.429	0.959433	21.5064	538.576	0.980543	5.1187	92.4928	0.958852	17.1116	612.007	0.975713	16.6796	810.561	0.890056	22.076	283.294	0.918425	19.438	331.167	0.887878	33.9669	200.062	0.924398	24.4563	320.037
9430038I01Rik	0.956424	9.86818	913.685	0.954901	16.7825	402.506	1	0	0	1	0	0	0.947489	20.8361	735.827	0.982622	14.2606	1620.59	0.986247	6.28091	126.236	0.979435	13.1428	224.502	0.961085	10.2374	211.055	0.975513	17.1116	314.513	0.974283	13.8997	960.222	0.935078	13.3618	112.161	0.927816	23.7575	274.493	0.921483	23.3522	199.863	0.9419	18.3422	298.572
9530068E07Rik	0.885159	33.5518	281.406	0.847666	69.5276	345.594	0.865802	121.284	771.483	0.830405	87.4195	499.588	0.921556	41.6721	460.033	0.848038	128.345	769.778	0.870799	86.3626	670.923	0.920543	40.6231	447.668	0.886297	33.2716	546.961	0.889268	57.0387	434.891	0.892552	88.9578	795.053	0.850991	31.9522	198.055	0.833207	47.515	346.384	0.820531	57.3191	479.97	0.905497	31.7932	355.663
9930021J03Rik	0.915524	21.71	381.009	0.929331	29.9688	682.561	0.975066	18.1926	768.126	0.955557	43.7097	518.93	0.949103	22.9197	375.42	0.955138	38.0282	1006.53	0.963244	18.8427	519.687	0.961085	19.1168	482.089	0.955885	17.9155	170.166	0.940361	28.5194	449.686	0.979426	11.1197	199.617	0.863779	29.0474	135.58	0.879997	33.1165	416.356	0.909712	23.3522	245.103	0.971765	12.2281	218.418
A130010J15Rik	0.982569	3.94727	129.204	0.996445	1.19875	853.242	1	0	0	1	0	0	0.989498	4.16721	153.412	0.99632	2.37676	266.667	0.97937	9.42137	416.886	0.985407	7.16878	198.879	0.990271	2.55935	70.3779	0.979426	8.55581	276.844	0.974283	13.8997	1012.42	0.958558	8.13328	209.97	0.982076	5.03947	309.735	0.968061	6.36879	99.0361	0.973539	8.5597	535.863
A230046K03Rik	0.88694	35.5255	436.627	0.86755	53.9438	643.549	0.96896	30.321	825.779	0.966081	17.4839	1137.18	0.936987	25.0033	507.766	0.9159	66.5494	606.309	0.952951	23.5534	365.28	0.93897	34.6491	669.379	0.941628	15.3561	183.589	0.917705	34.2232	429.141	0.942373	41.699	992.58	0.864316	33.1141	240.661	0.874533	35.2763	384.506	0.906233	21.2293	390.305	0.931958	22.0106	294.001
A430005L14Rik	0.926309	21.71	241.397	0.917868	32.3663	425.076	0.991689	6.06421	364.431	1	0	0	0.917661	35.4213	741.381	0.945966	38.0282	672.17	0.936772	32.9748	922.663	0.96738	19.1168	529.443	0.92217	20.4748	377.015	0.979426	8.55581	502.719	0.98457	8.3398	852.67	0.893647	21.4951	168.787	0.857722	35.2763	338.006	0.923658	23.3522	402.479	0.927709	29.3475	424.892
A530054K11Rik	0.973854	5.92091	103.562	0.964448	11.9875	405.711	1	0	0	1	0	0	0.994749	2.08361	170.969	0.985279	9.50706	815.224	0.989685	4.71069	1263.11	0.990271	4.77919	167.271	0.990271	2.55935	414.766	0.993142	2.85194	2247.19	1	0	0	0.963728	5.80948	106.199	0.959212	9.35902	142.481	0.954856	10.6147	98.1341	0.98866	3.66844	384.747
A830010M20Rik	0.984441	5.92091	220.347	0.996445	1.19875	77.2499	1	0	0	1	0	0	1	0	0	0.99632	2.37676	374.111	0.993123	3.14046	72.6721	1	0	0	0.980543	5.1187	82.5554	0.993142	2.85194	253.421	0.98457	8.3398	241.724	0.94787	8.13328	90.5919	0.96235	8.6391	264.31	0.950624	8.49172	78.0911	0.984879	4.89126	97.0582
A830080D01Rik	0.938993	13.8155	154.503	0.941706	22.7763	629.279	0.975066	18.1926	1554.16	1	0	0	0.951484	27.0869	478.959	0.94229	40.405	613.465	0.933345	34.545	711.877	0.934124	37.0387	349.394	0.944422	17.9155	279.779	0.958852	17.1116	789.24	0.945017	33.3592	486.175	0.910774	18.0094	179.462	0.896463	23.7575	286.276	0.954856	10.6147	368.524	0.952048	17.1194	164.344
AA414768	0.904002	31.5782	403.704	0.893779	47.9501	382.393	0.975066	18.1926	228.478	1	0	0	0.980389	10.418	538.202	0.992639	4.75353	512.203	0.997205	4.71069	348.149	0.995136	2.38959	2027.73	0.961085	10.2374	450.086	0.993142	2.85194	1126.13	0.994857	2.77993	132.345	0.989118	1.74285	91.554	0.98745	2.8797	138.657	0.972914	6.36879	300.043	0.99244	2.44563	83.7279
AA467197	1	0	0	0.996445	1.19875	68.3527	0.983377	12.1284	430.363	1	0	0	0.968494	12.5016	571.253	0.986859	14.2606	668.576	0.940198	31.4046	384.791	0.978849	11.948	1284.26	0.951357	12.7968	444.411	0.993142	2.85194	1240.69	0.995642	5.55986	167.757	0.996373	0.580948	90.9918	0.993725	1.43985	268.982	1	0	0	1	0	0
AA986860	0.991285	1.97364	123.518	1	0	0	0.991689	6.06421	364.431	0.983041	8.74195	225.785	0.989498	4.16721	357.936	0.978975	16.6374	396.864	0.993862	4.71069	1448.24	0.978849	11.948	542.731	0.931899	17.9155	320.627	0.960822	19.9636	688.808	0.962519	30.5793	593.845	0.905694	15.6856	133.711	0.941401	14.3985	279.231	0.933124	14.8605	212.463	0.99244	2.44563	113.712
AA987161	0.904132	21.71	224.184	0.92534	25.1738	436.028	0.958444	30.321	666.18	0.983041	8.74195	184.57	0.984247	6.25082	631.651	0.99632	2.37676	314.07	0.983764	9.42137	1940.34	0.993302	4.77919	727.553	0.980543	5.1187	215.569	0.986284	5.70387	234.231	0.989713	5.55986	1052.69	0.967356	5.22854	131.263	0.96646	8.6391	209.343	0.959622	8.49172	88.3012	0.973539	9.78251	251.852
Aaas	0.991285	1.97364	169.319	0.99289	2.3975	1390.58	0.991689	6.06421	900.09	0.983041	8.74195	184.57	1	0	0	0.99632	2.37676	660.066	0.982808	7.85114	902.519	0.995136	2.38959	283.265	0.980543	5.1187	82.3274	0.993142	2.85194	199.243	0.994857	2.77993	339.674	0.97461	4.06664	128.68	0.971762	6.47932	244.782	0.963885	8.49172	241.083	0.973539	8.5597	572.507
Aacs	0.930278	15.7891	779.154	0.88786	45.5526	400.74	0.944265	48.5137	927.294	0.919919	52.4517	833.766	0.912417	37.5049	413.416	0.802558	152.113	773.666	0.893884	64.3794	549.436	0.948001	28.6751	796.47	0.905951	46.0683	184.522	0.874495	77.0023	719.606	0.883378	66.7184	685.241	0.842489	44.733	186.007	0.85564	43.1955	377.315	0.894477	29.721	404.692	0.917369	33.016	320.069
Aaed1	0.956424	9.86818	200.12	0.971558	9.59001	165.926	0.983377	12.1284	188.521	1	0	0	0.994749	2.08361	257.931	0.992639	4.75353	1369.72	0.973523	14.1321	224.171	0.990271	4.77919	267.117	1	0	0	0.993142	2.85194	913.242	0.98457	8.3398	859.151	0.968457	5.80948	229.551	0.953936	11.5188	251.735	0.963885	8.49172	397.685	0.973539	8.5597	126.105
Aagab	0.950212	13.8155	277.337	0.948782	20.3788	667.266	0.991689	6.06421	203.128	1	0	0	0.963243	14.5852	293.116	0.977918	14.2606	867.831	0.962178	17.2725	749.22	0.985407	7.16878	190.05	0.951357	12.7968	700.952	0.979426	8.55581	812.858	0.985836	11.1197	648.372	0.910508	15.6856	194.448	0.947583	16.5583	265.808	0.901776	21.2293	266.665	0.973539	8.5597	225.004
Aak1	0.932887	17.7627	484.955	0.938165	23.975	582.626	1	0	0	0.983041	8.74195	1636.66	0.95041	25.0033	353.11	0.905518	64.1726	519.175	0.912014	50.2473	589.104	0.985407	7.16878	252.309	0.980543	5.1187	92.4366	0.979426	8.55581	414.033	0.98457	8.3398	754.266	0.923829	12.1999	112.502	0.930975	16.5583	243.824	0.959622	8.49172	98.3975	0.98866	3.66844	172.294
Aamdc	0.845931	37.4991	422.947	0.890592	57.5401	569.917	0.946091	54.5779	702.087	0.966081	17.4839	640.427	0.907113	50.0066	309.293	0.986255	11.8838	1711.88	0.953885	25.1237	866.792	0.979435	13.1428	604.075	0.941628	15.3561	227.309	0.979426	8.55581	377.693	0.974283	13.8997	688.71	0.663252	86.5613	312.241	0.819995	49.6748	366.632	0.852326	55.1962	290.635	0.846832	64.8091	596.135
Aamp	0.675389	112.497	290.056	0.692392	165.428	564.308	0.915056	84.8989	1054.41	0.919919	52.4517	1192.21	0.745058	135.434	612.953	0.879012	116.461	753.649	0.832926	111.486	758.284	0.846786	112.311	639.349	0.812469	71.6618	605.188	0.85821	62.7426	517.655	0.867503	102.857	631.855	0.610304	108.637	308.249	0.655836	140.385	449.989	0.719631	116.761	456.596	0.781637	146.738	655.063
Aar2	0.934903	19.7364	217.326	0.919389	28.77	382.917	0.991689	6.06421	1623.38	1	0	0	0.970002	14.5852	834.003	0.985279	9.50706	499.371	0.969055	14.1321	446.278	0.968382	15.5324	534.073	0.980543	5.1187	125.473	0.979426	8.55581	248.141	0.98457	8.3398	756.166	0.902706	18.5904	123.138	0.9204	20.1579	151.676	0.923658	23.3522	288.818	0.954639	14.6738	375.84
Aars	0.837256	49.3409	324.298	0.834389	75.5214	420.84	0.966755	24.2568	442.704	0.966081	17.4839	235.761	0.891592	56.2574	482.207	0.880905	83.1868	718.911	0.896434	70.6603	646.537	0.936417	41.8179	697.963	0.879187	38.3903	196.947	0.877252	65.5945	439.668	0.925902	47.2588	575.127	0.876479	32.5331	161.377	0.865842	35.2763	309.232	0.874006	40.3357	394.427	0.908615	40.3529	534.085
Aarsd1	0.880745	29.6045	366.079	0.870749	46.7513	659.684	0.983377	12.1284	1026.7	0.983041	8.74195	187.196	0.901945	52.0902	562.125	0.954296	35.6515	1227.32	0.882144	65.9496	612.896	0.924937	48.9867	712.691	0.808747	66.5431	237.712	0.958852	17.1116	797.407	0.933135	36.1391	640.254	0.807636	33.695	216.364	0.826013	52.5545	335.664	0.768213	59.4421	342.501	0.858594	69.7004	565.059
Aasdhppt	0.87838	37.4991	432.041	0.857828	58.7388	536.864	0.977113	24.2568	753.295	0.966081	17.4839	1336.26	0.901945	52.0902	552.597	0.966877	21.3909	564.943	0.91173	42.3962	623.43	0.948652	29.8699	922.337	0.888844	35.8309	275.634	0.96571	14.2597	1036.68	0.960392	25.0194	881.718	0.774784	43.5711	250.225	0.801195	58.3139	393.037	0.897243	25.4752	214.378	0.852585	58.6951	425.4
Aatf	0.956424	9.86818	315.288	0.957337	14.385	535.516	0.991689	6.06421	2785.52	0.966081	17.4839	729.373	0.963243	14.5852	707.711	0.988959	7.13029	205.24	0.968232	20.413	509.832	0.970814	14.3376	838.713	0.990271	2.55935	322.893	0.979426	8.55581	605.521	0.994857	2.77993	272.851	0.963728	5.80948	111.401	0.959212	10.0789	176.928	0.942035	12.7376	267.926	0.967127	13.451	203.352
Abca1	0.791586	82.8927	467.926	0.846704	83.9126	778.848	0.925199	54.5779	479.177	0.919919	52.4517	877.515	0.952741	18.7525	500.44	0.937434	40.405	934.431	0.966455	26.6939	618.89	0.968382	15.5324	446.549	0.961085	10.2374	412.416	0.931421	28.5194	429.852	0.970617	19.4595	318.402	0.909914	17.4285	121.05	0.92351	23.0376	376.915	0.957367	12.7376	170.087	0.975481	11.0053	231.082
Abca2	0.824668	47.3673	296.435	0.83883	93.5026	582.74	0.819606	206.183	1071.88	0.779397	227.291	1566.25	0.770411	137.518	652.842	0.453397	1012.5	1547.46	0.791033	270.079	767.899	0.77384	232.985	833.516	0.899742	56.3057	318.97	0.617626	342.232	662.83	0.837024	191.815	800.278	0.969331	6.39043	147.715	0.96235	8.6391	237.496	0.950888	10.6147	97.5781	0.973539	8.5597	261.648
Abca3	0.893764	31.5782	339.697	0.884001	52.7451	510.811	0.927723	60.6421	795.471	0.889996	78.6775	398.467	0.79756	116.682	506.052	0.661787	437.325	994.828	0.815605	171.155	702.775	0.782863	213.869	896.519	0.767352	107.493	305.83	0.579449	396.419	735.186	0.756722	277.993	820.988	0.672125	118.513	279.915	0.703168	135.346	376.106	0.770514	131.622	462.538	0.847851	94.1567	508.378
Abca4	1	0	0	0.996445	1.19875	383.436	1	0	0	0.983041	8.74195	669.792	0.973745	10.418	637.423	0.887568	87.9403	672.549	0.86868	103.635	761.907	0.997568	1.1948	2267.57	1	0	0	1	0	0	0.994857	2.77993	1945.53	1	0	0	1	0	0	1	0	0	1	0	0
Abca5	0.844007	45.3936	278.248	0.905499	39.5588	332.917	0.958444	30.321	279.937	0.915203	43.7097	366.773	0.940004	29.1705	354.459	0.927649	61.7959	828.226	0.963244	18.8427	304.38	0.901482	69.2982	647.511	0.963667	12.7968	107.08	0.766683	139.745	486	0.85139	108.417	865.81	0.880903	24.9808	213.569	0.872162	37.4361	279.115	0.921483	21.2293	137.858	0.946452	23.2335	421.535
Abcb10	0.967451	9.86818	336.251	0.92399	28.77	485.249	0.975066	18.1926	658.535	1	0	0	0.984247	6.25082	293.581	0.963196	23.7676	576.278	0.982808	7.85114	355.881	0.987839	5.97399	136.813	0.990271	2.55935	92.1489	0.958852	17.1116	347.82	0.989713	5.55986	95.3638	0.963728	5.80948	232.791	0.958657	12.2387	517.085	0.990971	2.12293	93.9055	0.981099	7.33688	438.58
Abcb5	0.967451	9.86818	171.691	0.983212	7.19251	480.537	0.983377	12.1284	1122.31	0.983041	8.74195	311.526	0.978996	8.33443	464.083	0.420431	1088.56	1638.19	0.725227	389.417	1221.14	0.742387	308.258	978.178	0.682768	179.155	528.538	0.521272	550.424	983.219	0.625503	458.689	1154.8	0.992746	1.1619	323.47	0.983556	7.19925	1082.25	0.990971	2.12293	76.3942	0.99622	1.22281	448.43
Abcb6	0.982569	3.94727	153.069	0.985779	4.79501	889.991	0.966755	24.2568	932.936	1	0	0	0.968494	12.5016	244.586	0.981598	11.8838	649.641	0.972493	12.5618	464.709	0.982975	8.36358	893.241	0.990271	2.55935	94.7329	0.979426	8.55581	285.934	0.979426	11.1197	613.092	0.967356	5.22854	135.841	0.97896	5.7594	142.96	0.959058	14.8605	374.927	0.977319	7.33688	623.315
Abcb7	0.958847	11.8418	585.739	0.964448	11.9875	252.499	0.991689	6.06421	2272.73	0.949122	26.2258	850.281	0.924352	35.4213	400.463	0.956986	30.8979	615.075	0.975931	10.9916	256.41	0.990271	4.77919	171.075	0.980543	5.1187	101.347	0.926689	34.2232	469.322	0.971673	22.2395	453.195	0.970983	4.64759	113.469	0.96235	8.6391	443.136	0.972914	6.36879	304.295	0.970891	11.0053	496.315
Abcb8	0.956424	9.86818	187.35	0.944252	20.3788	497.802	0.950132	36.3852	1056.91	0.983041	8.74195	789.889	0.973745	10.418	916.832	0.909196	61.7959	813.454	0.95874	18.8427	437.455	0.981833	11.948	606.242	0.970814	7.67805	99.1423	0.94719	25.6674	733.195	0.969139	16.6796	1013.11	0.927029	13.9428	113.386	0.911004	22.3177	199.434	0.909712	21.2293	146.732	0.950858	15.8966	169.593
Abcb9	0.967451	9.86818	142.062	0.949781	34.7638	538.411	1	0	0	1	0	0	1	0	0	0.985279	9.50706	972.704	0.993123	3.14046	101.925	0.988515	7.16878	743.838	1	0	0	0.993142	2.85194	222.469	0.98457	8.3398	1010.12	0.981864	2.90474	188.975	0.98745	2.8797	221.73	0.990971	2.12293	146.199	0.98866	3.66844	174.368
Abcc1	0.947708	11.8418	236.583	0.940701	21.5775	410.068	0.983377	12.1284	319.616	1	0	0	0.95041	25.0033	616.503	0.974238	16.6374	672.441	0.993123	3.14046	375.049	0.990271	4.77919	432.291	1	0	0	0.972568	11.4077	302.349	0.98457	8.3398	509.077	0.957608	7.55233	94.3906	0.984312	3.59962	150.004	0.981942	6.36879	113.342	0.99622	1.22281	74.8335
Abcc10	1	0	0	0.976159	9.59001	610.598	0.991689	6.06421	264.831	1	0	0	1	0	0	0.977918	14.2606	575.307	0.996562	1.57023	1040.58	0.986106	8.36358	240.635	1	0	0	0.972568	11.4077	356.465	0.989713	5.55986	657.538	0.981864	2.90474	95.159	0.98745	2.8797	788.633	0.975137	8.49172	824.595	0.981099	7.33688	192.988
Abcc3	0.982569	3.94727	549.815	0.964448	11.9875	342.139	0.966755	24.2568	323.616	0.869402	78.6775	609.636	0.912417	37.5049	386.317	0.841865	123.592	810.226	0.916198	42.3962	479.93	0.961085	19.1168	342.446	0.954062	15.3561	375.425	0.914837	42.779	430.941	0.945017	33.3592	455.246	0.924308	15.1047	184.071	0.948645	11.5188	166.363	0.963885	8.49172	126.741	0.958418	14.6738	143.727
Abcc5	0.973854	5.92091	210.033	0.96554	13.1863	328.536	0.983377	12.1284	447.558	0.983041	8.74195	361.925	0.989498	4.16721	371.876	0.977918	14.2606	380.484	0.980357	10.9916	1120.97	0.958653	20.3116	387.58	0.970814	7.67805	191.828	0.94719	25.6674	543.544	0.963996	19.4595	418.377	0.968457	5.80948	103.022	0.968625	7.19925	332.731	0.990971	2.12293	435.35	0.977319	7.33688	227.791
Abcc8	1	0	0	1	0	0	1	0	0	1	0	0	0.994749	2.08361	384.763	0.912247	68.9262	918.268	0.947045	28.2641	288.705	0.990271	4.77919	700.486	1	0	0	0.986284	5.70387	447.128	0.979426	11.1197	269.758	0.996373	0.580948	68.9988	1	0	0	1	0	0	1	0	0
Abcd3	0.796122	61.1827	197.231	0.914329	33.5651	290.522	0.97822	30.321	1286.45	0.886271	69.9356	403.896	0.892665	58.341	551.354	0.826217	142.606	805.145	0.875319	69.0901	631.373	0.937762	38.2335	771.097	0.858212	56.3057	414.653	0.882247	77.0023	441.426	0.894864	77.8381	933.782	0.707416	81.9137	196.928	0.717337	110.148	295.445	0.779193	82.7943	307.066	0.852148	66.0319	489.367
Abce1	0.905419	33.5518	340.247	0.930819	32.3663	412.919	0.991689	6.06421	412.201	1	0	0	0.936987	25.0033	263.345	0.952155	30.8979	821.182	0.943622	29.8343	476.355	0.944853	28.6751	723.658	0.941628	15.3561	207.238	0.94719	25.6674	342.045	0.934754	38.9191	941.378	0.789055	38.9235	153.454	0.87295	33.8365	465.836	0.872101	42.4586	501.02	0.904112	40.3529	431.821
Abcf1	0.758433	76.9718	300.412	0.763711	129.465	551.867	0.880266	103.092	1148.96	0.983041	8.74195	663.57	0.82823	104.18	668.64	0.907649	68.9262	960.081	0.894961	58.0985	636.048	0.890464	77.6618	630.102	0.694899	87.0179	526.822	0.878688	68.4465	812.301	0.938317	47.2588	598.986	0.696331	74.3614	213.815	0.766725	78.4718	408.779	0.722152	104.024	450.755	0.794836	96.6023	479.711
Abcf2	0.915524	21.71	220.341	0.939878	26.3725	510.966	0.958444	30.321	1000.29	1	0	0	0.957992	16.6689	631.368	0.961599	30.8979	915.122	0.956383	21.9832	694.416	0.966719	17.922	628.467	0.931899	17.9155	109.062	0.951994	19.9636	672.08	0.953709	25.0194	492.511	0.931491	14.5237	259.647	0.911031	20.1579	278.36	0.900683	23.3522	414.771	0.934254	24.4563	388.617
Abcf3	0.839735	41.4464	252.913	0.879122	40.7576	564.576	0.991689	6.06421	875.657	1	0	0	0.926485	29.1705	458.333	0.959516	26.1444	913.753	0.93811	28.2641	731.798	0.949714	26.2855	696.867	0.931899	17.9155	533.292	0.958852	17.1116	1191.27	0.979426	11.1197	521.553	0.900735	17.4285	264.201	0.892204	26.6372	193.841	0.887878	31.844	449.897	0.929412	31.7932	466.329
Abcg2	0.8885	37.4991	686.684	0.943116	19.18	444.267	0.966755	24.2568	568.278	1	0	0	0.994749	2.08361	215.239	1	0	0	0.990319	15.7023	1014.98	1	0	0	0.966312	17.9155	390.374	0.988312	22.8155	5182.92	0.842542	1120.31	12517.1	0.303886	2893.12	3030.75	0.188975	4247.56	5338.5	0.0925999	4186.42	4215.2	0.170357	4938.94	5546.51
Abhd1	0.924209	19.7364	437.51	0.957337	14.385	534.309	0.958444	30.321	781.69	0.966081	17.4839	207.466	0.963243	14.5852	630.403	0.948475	33.2747	997.609	0.969055	14.1321	492.834	0.968382	15.5324	762.155	0.980543	5.1187	139.319	0.938279	25.6674	336.187	0.951426	33.3592	774.88	0.982873	3.48569	222.599	0.964152	10.0789	456.72	0.983881	6.36879	146.184	0.967127	12.2281	304.948
Abhd10	0.958847	11.8418	391.595	0.964448	11.9875	403.632	0.983377	12.1284	386.006	1	0	0	0.957992	16.6689	173.835	0.981598	11.8838	902.019	0.975931	10.9916	619.906	0.981271	10.7532	551.369	0.951357	12.7968	224.148	1	0	0	0.989713	5.55986	205.72	0.952847	7.55233	108.897	0.971762	6.47932	414.778	0.972914	6.36879	306.969	0.979438	6.11407	502.303
Abhd11	0.906834	23.6836	189.15	0.865702	51.5463	542.785	0.916887	60.6421	748.307	0.983041	8.74195	988.142	0.870443	54.1738	492.775	0.882973	87.9403	751.109	0.858748	86.3626	651.641	0.899722	58.5451	801.336	0.839259	61.4244	233.713	0.892465	48.4829	582.014	0.941233	38.9191	1221.42	0.717987	70.8757	242.255	0.763235	82.7913	344.939	0.863163	44.5815	284.705	0.87384	66.0319	442.988
Abhd12	0.759395	92.7609	342.191	0.781279	99.4964	440.735	0.880266	103.092	959.445	0.806228	122.387	591.963	0.866493	81.2607	476.277	0.671615	320.863	1051.26	0.76762	182.147	724.725	0.840266	136.207	621.591	0.790258	89.5773	350.904	0.735477	205.339	493.238	0.804243	164.016	792.819	0.627814	124.323	309.555	0.632644	161.263	426.597	0.562348	171.957	396.193	0.738537	173.64	579.326
Abhd13	0.941556	15.7891	570.541	0.961995	14.385	645.122	0.983377	12.1284	1204.98	0.949122	26.2258	370.17	0.922905	33.3377	748.212	0.926393	47.5353	489.339	0.952951	23.5534	412.15	0.96606	22.7012	509.869	0.941628	15.3561	129.109	0.951994	19.9636	499.633	0.958852	22.2395	486.587	0.856622	33.695	142.284	0.855036	38.8759	349.679	0.894477	27.5981	351.025	0.950858	15.8966	523.63
Abhd14a	0.982569	3.94727	109.805	0.989334	3.59626	172.196	0.983377	12.1284	458.138	1	0	0	1	0	0	0.99632	2.37676	599.161	0.996562	1.57023	84.0124	0.990271	4.77919	624.029	0.970814	7.67805	324.834	0.993142	2.85194	174.917	1	0	0	0.953988	8.13328	153.932	0.984312	3.59962	160.46	0.942035	12.7376	292.153	0.977319	7.33688	561.267
Abhd14b	0.857097	37.4991	418.956	0.908168	37.1613	272.574	0.975066	18.1926	885.783	0.983041	8.74195	187.196	0.940004	29.1705	579.343	1	0	0	0.977698	14.1321	182.074	0.975678	11.948	493.819	0.931899	17.9155	108.005	0.986284	5.70387	403.402	0.994857	2.77993	1618.12	0.626578	121.999	291.749	0.700736	105.829	418.328	0.756674	116.761	414.234	0.746543	128.395	505.172
Abhd16a	0.841919	55.2618	328.495	0.827785	71.9251	420.057	0.935998	54.5779	836.238	0.915203	43.7097	297.458	0.924352	35.4213	663.338	0.903983	71.3029	965.802	0.888965	62.8091	644.663	0.911194	51.3763	448.782	0.881411	40.9496	290.402	0.856889	74.1503	648.35	0.898797	58.3786	694.431	0.676224	87.1423	207.72	0.741315	104.389	294.861	0.758584	82.7943	427.989	0.816766	97.8251	363.887
Abhd17a	0.768507	76.9718	381.636	0.790074	117.478	557.844	0.944265	48.5137	989.81	0.966081	17.4839	406.63	0.90023	39.5885	471.938	0.91955	64.1726	685.522	0.891197	67.5198	616.939	0.900569	66.9087	585.528	0.782246	94.696	529.774	0.854395	85.5581	529.211	0.900291	61.1585	802.639	0.627894	101.085	250.083	0.783449	71.9925	389.644	0.712449	93.4089	356.578	0.835615	67.2548	519.07
Abhd17b	0.956424	9.86818	652.677	0.950227	16.7825	688.934	0.991689	6.06421	412.201	0.983041	8.74195	1239.16	0.963243	14.5852	357.339	0.9223	59.4191	923.405	0.923989	40.8259	765.456	0.95107	28.6751	606.364	0.92217	20.4748	230.231	0.958852	17.1116	809.386	0.945017	33.3592	708.773	0.850234	31.9522	238.58	0.903358	25.9173	312.557	0.907723	29.721	283.308	0.930487	25.6791	468.308
Abhd17c	0.94347	17.7627	209.205	0.886004	49.1488	469.21	0.905039	84.8989	804.643	1	0	0	0.968494	12.5016	594.06	0.985279	9.50706	398.116	0.982808	7.85114	1183.3	0.987839	5.97399	138.051	0.951357	12.7968	436.767	0.96571	14.2597	323.581	0.98457	8.3398	423.194	0.911596	16.2666	116.196	0.96235	8.6391	227.565	0.981942	4.24586	128.121	0.940726	20.7878	561.551
Abhd2	0.704374	112.497	337.995	0.819665	86.3101	572.773	0.900265	72.7705	850.999	0.898243	52.4517	357.929	0.882496	52.0902	587.829	0.934938	45.1585	693.614	0.925475	36.1153	600.578	0.949245	31.0647	478.045	0.888844	35.8309	443.064	0.846539	71.2984	733.486	0.888735	77.8381	606.128	0.845022	31.3712	154.691	0.873548	38.156	398.221	0.870237	29.721	466.947	0.920194	30.5703	453.118
Abhd3	0.965139	7.89454	128.164	0.960892	13.1863	493.414	0.991689	6.06421	599.52	1	0	0	0.989498	4.16721	143.625	0.966877	21.3909	473.063	0.987159	7.85114	796.078	0.987839	5.97399	579.663	0.941628	15.3561	127.659	0.972568	11.4077	581.491	0.939886	36.1391	741.718	0.920713	15.6856	145.45	0.930975	15.8383	187.557	0.96628	10.6147	170.401	0.931958	23.2335	679.025
Abhd4	0.924209	19.7364	186.528	0.930047	25.1738	362.41	0.983377	12.1284	1010.78	1	0	0	0.976189	14.5852	694.341	0.992639	4.75353	439.768	0.972493	12.5618	252.273	0.985407	7.16878	606.769	0.990271	2.55935	163.854	0.993142	2.85194	200.884	0.989713	5.55986	134.686	0.951353	9.87612	371.974	0.951679	12.9586	443.632	0.963885	8.49172	561.851	0.969759	9.78251	444.925
Abhd5	0.950212	13.8155	109.769	0.967152	15.5838	331.186	1	0	0	0.983041	8.74195	593.472	0.952741	18.7525	398.237	0.939654	45.1585	443.898	0.941072	32.9748	563.451	0.918078	60.9347	590.633	0.799151	69.1025	400.691	0.902852	51.3348	532.572	0.914211	50.0388	897.922	0.864537	29.0474	160.058	0.910381	25.1974	406.846	0.924179	19.1064	109.61	0.939518	19.565	468.001
Abhd6	0.992616	3.94727	164.541	0.99289	2.3975	95.9294	0.991689	6.06421	1161.44	0.983041	8.74195	230.362	0.994749	2.08361	624.61	0.99632	2.37676	930.233	0.989685	4.71069	288.588	0.987839	5.97399	759.908	0.990271	2.55935	128.601	0.972568	11.4077	287.92	0.979426	11.1197	554.901	0.905892	20.9141	271.219	0.932128	20.8778	335.517	0.870237	31.844	220.104	0.928602	29.3475	255.817
Abhd8	0.938993	13.8155	145.483	0.971558	9.59001	549.012	0.991689	6.06421	521.376	0.966081	17.4839	444.018	0.963243	14.5852	542.857	0.915352	54.6656	766.48	0.95874	18.8427	514.757	0.966719	17.922	360.122	0.970814	7.67805	173.155	0.90616	42.779	526.252	0.970617	19.4595	483.024	0.918834	14.5237	301.38	0.943525	13.6786	319.731	0.941436	19.1064	418.783	0.969759	11.0053	138.132
Abi1	0.883112	31.5782	263.384	0.88953	41.9563	449.617	0.975066	18.1926	611.812	1	0	0	0.925615	37.5049	749.054	0.952155	30.8979	768.778	0.939216	29.8343	337.309	0.908658	58.5451	510.838	0.91774	28.1529	307.773	0.951994	19.9636	663.939	0.933135	36.1391	548.626	0.771846	51.1235	207.853	0.816577	62.6335	396.728	0.7746	78.5484	211.105	0.877677	44.0213	539.949
Abi2	0.956424	9.86818	181.596	0.93554	26.3725	264.876	1	0	0	1	0	0	0.963243	14.5852	454.839	0.971659	21.3909	525.8	0.959814	20.413	158.269	0.965546	21.5064	637.464	0.908124	30.7122	332.821	0.905576	57.0387	377.931	0.959001	38.9191	292.51	0.874776	23.8189	124.165	0.904738	23.7575	190.896	0.957367	12.7376	103.077	0.974651	9.78251	384.974
Abl1	0.973854	5.92091	139.7	0.958448	15.5838	594.669	0.991689	6.06421	1182.03	0.983041	8.74195	1745.2	0.978996	8.33443	331.019	0.963196	23.7676	637.026	0.972493	12.5618	326.396	0.976425	13.1428	373.031	0.970814	7.67805	565.172	0.972568	11.4077	351.904	0.98457	8.3398	192.999	0.950368	8.71423	116.598	0.940387	13.6786	279.769	1	0	0	0.981099	6.11407	177.917
Abl2	0.947708	11.8418	132.336	0.944252	20.3788	298.26	0.975066	18.1926	263.245	1	0	0	0.978996	8.33443	491.299	0.965243	28.5212	583.285	0.975931	10.9916	568.791	0.980543	9.55838	264.172	0.990271	2.55935	139.315	0.958852	17.1116	343.081	0.966638	25.0194	185.424	0.962929	8.13328	233.995	0.952937	11.5188	334.493	0.963885	8.49172	119.057	0.98866	3.66844	522.402
Ablim1	0.905419	33.5518	401.829	0.900775	45.5526	307.409	0.991689	6.06421	599.52	1	0	0	1	0	0	0.992639	4.75353	1135.77	0.980357	10.9916	682.756	0.990271	4.77919	428.972	0.980543	5.1187	120.564	0.993142	2.85194	551.572	0.98457	8.3398	1781.52	0.856614	29.6284	129.318	0.884583	33.8365	269.574	0.878907	36.0898	353.796	0.954639	14.6738	249.916
Abo	1	0	0	1	0	0	1	0	0	0.949122	26.2258	1175.35	0.978996	8.33443	759.095	0.885642	83.1868	707.702	0.929717	43.9664	878.52	0.980543	9.55838	590.688	0.980543	5.1187	102.57	0.958852	17.1116	310.431	0.986521	13.8997	165.334	0.985491	2.32379	133.244	0.975839	6.47932	167.752	0.967762	12.7376	308.384	0.970891	11.0053	187.444
Abr	1	0	0	0.985779	4.79501	93.7064	1	0	0	1	0	0	0.984247	6.25082	109.048	0.959516	26.1444	729.983	0.989685	4.71069	122.77	0.997568	1.1948	331.345	1	0	0	0.993142	2.85194	512.295	1	0	0	0.957608	7.55233	92.0245	0.9749	5.7594	156.44	0.933124	14.8605	230.072	0.979438	6.11407	77.9803
Abracl	0.781064	193.416	436.935	0.817373	330.856	732.691	0.930476	133.413	693.166	0.903114	61.1936	1055.4	0.85098	125.016	1167.05	0.819921	137.852	836.089	0.785988	199.419	1040.79	0.865667	135.012	1181.66	0.621223	202.189	661.603	0.850091	77.0023	835.956	0.86504	113.977	907.914	0.550619	215.532	579.792	0.671855	184.301	582.727	0.745147	135.868	506.841	0.752348	154.075	758.768
Abt1	0.94347	17.7627	474.825	0.941706	22.7763	290.925	0.975066	18.1926	1053.87	0.983041	8.74195	1745.2	0.912417	37.5049	385.4	0.948475	33.2747	586.961	0.908607	51.8175	420.1	0.964962	20.3116	835.408	0.915396	25.5935	278.924	0.975513	17.1116	797.815	0.960392	25.0194	685.778	0.823898	37.7617	169.599	0.870642	35.2763	251.725	0.891655	25.4752	278.866	0.8954	36.6844	419.823
Abtb1	0.947708	11.8418	148.538	0.944252	20.3788	560.622	0.96896	30.321	810.269	1	0	0	0.978996	8.33443	152.234	0.956986	30.8979	761.911	0.964124	20.413	549.533	0.973246	13.1428	267.493	0.961085	10.2374	530.184	0.993142	2.85194	248.694	0.966638	25.0194	573.682	0.931084	11.038	198.688	0.932921	17.2782	235.258	0.954856	10.6147	490.149	0.96336	13.451	451.208
Acaa1a	0.799489	65.13	237.301	0.814599	92.3039	518.577	0.877975	97.0273	728.384	0.898243	52.4517	745.249	0.844154	85.4279	382.114	0.902174	78.4332	971.47	0.89409	56.5282	713.597	0.936897	43.0127	641.623	0.900569	35.8309	346.339	0.912262	54.1868	521.879	0.932225	47.2588	868.412	0.74567	62.1615	193.312	0.779378	81.3515	307.74	0.800202	82.7943	364.331	0.791796	106.385	547.082
Acaa1b	0.965139	7.89454	129.738	0.962905	15.5838	321.627	0.950132	36.3852	498.046	1	0	0	0.98554	8.33443	214.204	0.974238	16.6374	669.596	0.97937	9.42137	396.081	0.982975	8.36358	329.224	0.951357	12.7968	261.867	0.960822	19.9636	499.412	0.986521	13.8997	394.82	0.933387	10.4571	130.548	0.968625	7.91917	168.635	0.948421	14.8605	135.224	0.952048	17.1194	379.12
Acaa2	0.818129	51.3145	295.685	0.834389	75.5214	704.918	0.911154	72.7705	1026.15	1	0	0	0.954335	20.8361	876.341	0.943318	42.7818	703.181	0.912767	43.9664	984.041	0.981271	10.7532	685.368	0.970814	7.67805	280.153	0.979426	8.55581	304.024	0.989713	5.55986	1270.34	1	0	0	0.984312	3.59962	872.642	0.96628	10.6147	805.168	0.99622	1.22281	2557.54
Acaca	0.904132	21.71	148.122	0.975113	8.39126	462.394	0.991689	6.06421	295.596	0.983041	8.74195	184.57	0.963243	14.5852	334.303	0.977918	14.2606	277.405	0.975931	10.9916	881.667	0.950426	27.4803	571.6	0.965263	15.3561	663.8	0.951994	19.9636	771.33	0.948566	27.7993	526.453	0.932269	15.1047	160.211	0.929791	17.9981	420.164	0.945827	12.7376	278.035	0.99622	1.22281	127.796
Acad10	0.982569	3.94727	115.597	0.985779	4.79501	288.123	0.991689	6.06421	203.128	0.966081	17.4839	636.342	1	0	0	0.97251	23.7676	1119.78	0.969055	14.1321	266.956	0.982975	8.36358	252.876	0.961085	10.2374	147.305	0.993142	2.85194	283.93	0.974283	13.8997	625.503	0.945592	8.71423	235.985	0.964152	10.0789	406.581	0.959622	8.49172	241.244	0.984879	4.89126	113.035
Acad11	0.982569	3.94727	89.7168	0.957337	14.385	342.09	1	0	0	1	0	0	0.994749	2.08361	201.491	0.974238	16.6374	669.83	0.980357	10.9916	692.767	0.990271	4.77919	761.152	0.970814	7.67805	71.3679	0.993142	2.85194	138.447	0.98457	8.3398	444.578	0.9333	12.1999	165.719	0.93725	15.1184	221.063	0.936798	14.8605	178.558	0.965979	12.2281	100.022
Acad12	1	0	0	0.982224	5.99376	184.533	0.991689	6.06421	889.68	1	0	0	0.984247	6.25082	440.877	1	0	0	1	0	0	0.997568	1.1948	2487.56	1	0	0	0.993142	2.85194	325.627	0.979426	11.1197	769.101	0.960101	6.39043	160.211	0.942305	15.1184	188.638	0.945827	12.7376	111.611	0.969759	9.78251	341.663
Acad8	0.819259	65.13	291.349	0.796591	89.9064	507.946	0.877975	97.0273	956.745	0.936662	43.7097	577.178	0.873465	58.341	676.312	0.917644	59.4191	922.156	0.934245	36.1153	446.501	0.952851	26.2855	384.912	0.93476	20.4748	140.885	0.96571	14.2597	679.892	0.96327	33.3592	823.182	0.789188	41.8283	162.22	0.791874	60.4737	285.102	0.840288	50.9503	326.516	0.878773	44.0213	412.928
Acadl	0.941556	15.7891	135.441	0.940604	27.5713	349.876	0.975066	18.1926	495.434	1	0	0	0.994749	2.08361	536.193	0.99632	2.37676	461.255	0.983764	9.42137	370.405	0.992703	3.58439	328.964	0.961085	10.2374	316.975	0.986284	5.70387	1554.38	0.98457	8.3398	1191.57	0.8666	24.3998	137.488	0.86494	34.5564	280.354	0.861228	33.9669	386.396	0.894845	40.3529	443.728
Acadm	0.880745	29.6045	248.213	0.868404	55.1426	466.696	0.991689	6.06421	295.596	0.983041	8.74195	663.57	0.926485	29.1705	418.862	0.963196	23.7676	459.094	0.973523	14.1321	738.333	0.961085	19.1168	769.041	0.925083	23.0342	601.999	0.986284	5.70387	869.563	0.979426	11.1197	1058.67	0.781332	56.933	282.743	0.841965	53.2744	345.951	0.82431	61.565	352.388	0.823914	77.0373	565.652
Acads	0.895417	23.6836	215.643	0.934623	25.1738	369.087	0.991689	6.06421	1161.44	0.966081	17.4839	695.065	0.968494	12.5016	226.54	0.963196	23.7676	631.406	0.952951	23.5534	860.762	0.980543	9.55838	317.067	0.931899	17.9155	259.342	0.979426	8.55581	606.815	0.979426	11.1197	401.109	0.908984	16.8475	192.865	0.866134	31.6767	348.028	0.903483	25.4752	391.846	0.915295	36.6844	386.964
Acadsb	0.837256	49.3409	273.675	0.898448	41.9563	307.465	0.991689	6.06421	276.855	0.983041	8.74195	1124.86	0.91324	50.0066	444.061	0.900317	73.6797	664.847	0.875319	69.0901	765.73	0.899722	58.5451	504.813	0.888844	35.8309	278.169	0.903989	39.9271	905.004	0.919348	47.2588	753.235	0.797938	48.7997	188.202	0.826985	49.6748	352.817	0.84916	53.0733	393.336	0.879409	58.6951	470.783
Acadvl	0.893764	31.5782	601.518	0.908168	37.1613	479.121	0.95252	42.4495	677.388	0.983041	8.74195	397.456	0.934791	31.2541	740.012	0.94964	35.6515	897.204	0.941547	26.6939	892.825	0.961862	20.3116	620.902	0.908124	30.7122	275.108	0.926689	34.2232	525.295	0.953709	25.0194	554.737	0.830632	33.1141	270.512	0.818382	48.9549	370.212	0.715212	84.9172	377.378	0.866265	58.6951	518.004
Acap1	0.915524	21.71	324.029	0.904635	38.3601	535.981	0.983377	12.1284	339.527	1	0	0	0.989498	4.16721	1718.54	0.961599	30.8979	848.382	0.97937	9.42137	303.537	0.980543	9.55838	736.945	0.990271	2.55935	72.5058	0.993142	2.85194	153.752	0.989713	5.55986	876.284	0.989118	1.74285	81.4507	0.993725	1.43985	93.9375	0.990971	2.12293	67.9302	0.99622	1.22281	1182.03
Acap2	0.895417	23.6836	221.218	0.947803	19.18	648.005	0.991689	6.06421	242.777	1	0	0	0.922905	33.3377	392.19	0.971659	21.3909	816.012	0.970927	17.2725	488.204	0.96738	19.1168	417.546	0.936897	23.0342	453.522	0.96571	14.2597	688.497	0.980791	13.8997	692.441	0.843072	32.5331	175.994	0.879197	32.3966	366.403	0.939454	16.9834	194.441	0.933132	29.3475	462.924
Acap3	0.973854	5.92091	195.285	0.985779	4.79501	597.637	1	0	0	1	0	0	0.978996	8.33443	416.416	0.982622	14.2606	758.229	0.972493	12.5618	183.615	0.990271	4.77919	641.65	0.990271	2.55935	72.5058	0.993142	2.85194	283.93	0.994857	2.77993	269.76	0.989118	1.74285	243.23	0.9749	5.7594	158.477	1	0	0	0.99622	1.22281	138.389
Acat1	0.839736	41.4464	425.275	0.881208	55.1426	587.337	0.911154	72.7705	1176.44	0.966081	17.4839	606.963	0.849449	62.5082	669.544	0.871066	104.578	835.915	0.885555	64.3794	865.046	0.905151	57.3503	929.58	0.8211	53.7464	525.209	0.880723	57.0387	815.39	0.919348	47.2588	556.064	0.85303	30.2093	217.892	0.886531	36.7162	439.899	0.779884	72.1796	382.044	0.847905	59.9179	538.528
Acat2	0.820073	53.2882	324.136	0.826931	70.7264	602.047	0.911154	72.7705	1010.21	0.949122	26.2258	344.144	0.79846	118.766	660.415	0.800251	185.388	841.772	0.769664	189.998	995.963	0.801609	135.012	786.299	0.645842	186.833	528.862	0.859643	99.8178	668.339	0.815873	144.556	1011.49	0.743236	73.1995	280.991	0.749987	89.2707	436.26	0.769032	101.901	345.717	0.823914	77.0373	502.872
Acat3	0.991285	1.97364	141.884	0.982224	5.99376	657.952	0.991689	6.06421	316.756	0.983041	8.74195	2331	0.926485	29.1705	669.432	0.99632	2.37676	1980.2	0.986247	6.28091	313.387	0.992703	3.58439	588.701	1	0	0	0.979426	8.55581	205.301	0.994857	2.77993	2000	0.992746	1.1619	78.1024	0.984312	3.59962	702.853	0.990971	2.12293	90.967	1	0	0
Acbd3	0.748189	76.9718	281.385	0.784658	123.471	420.822	0.916887	60.6421	540.921	0.932162	34.9678	473.564	0.755955	145.852	571.138	0.850043	121.215	688.028	0.810585	149.172	593.301	0.806381	132.623	776.913	0.679313	143.324	475.465	0.78876	102.67	736.285	0.887558	91.7378	1035.58	0.663535	102.247	236.473	0.715153	118.788	346.012	0.763394	110.392	441.954	0.795822	117.39	563.075
Acbd4	0.991285	1.97364	180.799	0.958448	15.5838	164.429	0.991689	6.06421	264.831	1	0	0	0.989498	4.16721	237.624	0.966877	21.3909	982.774	0.972493	12.5618	261.469	0.970814	14.3376	566.259	0.941628	15.3561	292.383	0.958852	17.1116	212.079	0.98457	8.3398	945.695	0.856733	26.7236	256.809	0.910381	25.9173	377.318	0.900683	25.4752	575.883	0.939518	19.565	401.887
Acbd5	0.831049	43.42	165.316	0.904635	38.3601	251.591	0.950132	36.3852	1157.64	1	0	0	0.90867	41.6721	641.048	0.951504	40.405	551.818	0.939216	29.8343	432.961	0.964291	19.1168	422.733	0.863798	35.8309	342.809	0.974388	14.2597	390.475	0.960392	25.0194	436.519	0.760857	60.4186	212.66	0.781698	69.1128	357.32	0.852327	53.0733	238.82	0.840824	75.8145	429.512
Acbd6	0.742694	96.7082	388.623	0.781185	115.08	474.981	0.869676	103.092	738.701	0.949122	26.2258	356.134	0.830677	95.8459	590.928	0.908593	71.3029	850.398	0.876915	72.2305	626.353	0.857372	88.415	707.676	0.727376	112.611	392.829	0.885615	51.3348	618.944	0.829921	102.857	827.614	0.51214	208.561	415.4	0.62805	192.22	540.582	0.49135	244.137	626.705	0.691088	227.443	635.262
Acbd7	0.94347	17.7627	201.112	0.91066	49.1488	623.95	0.927723	60.6421	468.876	0.942525	69.9356	1415.58	0.88001	87.5115	1195.36	0.821074	444.455	2055.01	0.64657	1067.76	2666.86	0.548292	2584.35	4535.77	0.322131	2114.02	3252.76	0.740239	633.13	1943.7	0.75637	897.918	2746.02	0.255768	1261.82	1938.75	0.467499	1146.12	1803.39	0.424844	1167.61	1743.36	0.476864	1204.47	2237.61
Acd	0.843125	35.5255	203.736	0.939069	25.1738	549.107	0.975066	18.1926	1348.92	1	0	0	0.978996	8.33443	743.858	0.974238	16.6374	731.112	0.980357	10.9916	319.791	0.987839	5.97399	591.123	0.990271	2.55935	481.696	0.979426	8.55581	861.803	0.979426	11.1197	888.958	0.890912	19.7522	134.879	0.940387	13.6786	250.248	0.936798	14.8605	428.372	0.95681	17.1194	302.601
Ace	0.824668	47.3673	358.98	0.83827	103.093	643.343	0.692956	357.788	1071.43	0.429947	611.936	1201.91	0.552767	552.156	1167.2	0.9159	66.5494	868.199	0.906871	48.6771	607.734	0.981271	10.7532	493.465	1	0	0	0.960822	19.9636	554.504	0.985836	11.1197	509.601	0.968457	5.80948	120.051	0.982076	5.03947	136.69	0.981942	4.24586	522.289	0.98866	3.66844	752.621
Acer2	0.973854	5.92091	157.986	0.976159	9.59001	1115.14	0.991689	6.06421	129.199	0.983041	8.74195	669.792	0.978996	8.33443	629.516	0.966877	21.3909	428.157	0.975931	10.9916	590.408	0.972211	16.7272	555.213	0.938533	25.5935	292.225	0.974388	14.2597	269.367	0.965508	22.2395	316.819	0.887295	20.9141	219.899	0.929791	17.9981	230.864	0.918741	19.1064	298.474	0.964301	14.6738	181.965
Acer3	0.977161	9.86818	240.537	0.952318	19.18	363.155	0.966755	24.2568	749.599	1	0	0	0.973745	10.418	497.31	0.944795	35.6515	572.649	0.962127	25.1237	452.484	0.975678	11.948	562.848	0.944422	17.9155	268.041	0.958852	17.1116	1125.88	0.854054	155.676	1716.81	0.526515	273.046	445.19	0.467229	419.716	793.452	0.48704	358.775	619.728	0.580587	421.871	874.747
Acin1	0.785479	73.0245	236.773	0.807108	86.3101	487.368	0.950132	36.3852	556.849	1	0	0	0.849306	83.3443	470.274	0.903008	80.81	721.801	0.866712	76.9412	512.615	0.890999	71.6878	859.507	0.839259	61.4244	386.779	0.883415	48.4829	434.015	0.895163	63.9384	1079.46	0.713102	74.9424	266.121	0.757345	96.4699	402.35	0.764422	91.286	347.68	0.84513	75.8145	482.865
Acly	0.594412	219.074	556.902	0.572533	397.986	956.841	0.652205	563.971	1489.77	0.63476	393.388	919.469	0.563114	591.744	1254.49	0.648144	475.353	1226.23	0.7798	186.857	802.264	0.682888	351.27	1047.49	0.650818	245.698	650.093	0.559728	516.2	992.955	0.732325	364.171	1064.86	0.656603	163.247	349.149	0.654921	208.778	594.767	0.795214	131.622	624.748	0.844507	74.5916	493.974
Acn9	0.982569	3.94727	123.782	0.960892	13.1863	160.722	0.983377	12.1284	1566.87	1	0	0	0.978996	8.33443	1016.15	0.979731	19.0141	970.062	0.959814	20.413	470.296	0.986106	8.36358	948.399	0.97321	10.2374	293.132	1	0	0	0.98457	8.3398	227.822	0.932255	11.619	245.338	0.934112	15.1184	280.349	0.972914	6.36879	86.8617	0.965979	12.2281	198.404
Aco1	0.81496	59.2091	362.294	0.848912	64.7326	456.371	0.966755	24.2568	1101.02	0.881284	61.1936	1107.86	0.883917	54.1738	464.291	0.806016	161.62	757.633	0.850743	106.776	703.458	0.94017	37.0387	466.942	0.883328	43.509	297.205	0.908022	45.631	457.396	0.920859	66.7184	794.229	0.741451	76.1043	183.378	0.750998	103.669	383.367	0.724766	108.269	470.579	0.829757	80.7057	530.03
Aco2	0.80949	53.2882	265.792	0.857828	58.7388	525.876	0.911154	72.7705	1182.89	0.966081	17.4839	696.94	0.89782	56.2574	677.044	0.861958	104.578	812.223	0.887814	69.0901	618.769	0.894773	66.9087	712.109	0.818333	63.9838	526.589	0.871885	91.262	629.595	0.867145	86.1779	581.49	0.714748	81.9137	216.005	0.734564	110.868	338.448	0.706049	112.515	468.761	0.806163	112.499	412.922
Acot1	0.906834	23.6836	149.569	0.870463	65.9314	537.576	0.975066	18.1926	1043.61	0.983041	8.74195	252.08	0.973745	10.418	940.197	0.988959	7.13029	1230.41	0.970099	15.7023	117.243	0.961862	20.3116	751.751	0.905702	28.1529	265.252	0.938279	25.6674	410.863	0.95651	30.5793	963.849	0.71941	83.0756	277.094	0.795155	68.3929	365.873	0.752925	108.269	273.96	0.793524	114.944	661.543
Acot13	0.783543	59.2091	441.709	0.840848	88.7076	570.453	0.935998	54.5779	913.684	0.966081	17.4839	883.767	0.880008	58.341	920.281	0.905518	64.1726	1121.21	0.867009	111.486	839.821	0.89608	63.3243	930.687	0.779423	89.5773	509.53	0.911035	51.3348	523.78	0.903936	55.5986	1116.41	0.636202	100.504	412.144	0.728248	110.148	534.445	0.711015	118.884	552.716	0.767907	152.852	720.889
Acot2	0.977161	9.86818	245.234	0.939069	25.1738	322.434	0.991689	6.06421	276.855	0.983041	8.74195	230.362	0.975205	12.5016	571.31	0.99632	2.37676	676.133	0.987159	7.85114	1353.45	0.990271	4.77919	846.642	0.970814	7.67805	253.339	0.993142	2.85194	1464.13	0.989713	5.55986	411.134	0.884866	28.4665	285.563	0.913493	24.4774	332.96	0.846511	38.2127	412.527	0.926443	34.2388	510.951
Acot7	0.956424	9.86818	485.547	0.967152	15.5838	295.615	0.991689	6.06421	1166.86	1	0	0	0.952741	18.7525	785.506	0.977918	14.2606	705.44	0.969055	14.1321	775.099	0.975678	11.948	560.259	0.980543	5.1187	71.4419	0.993142	2.85194	325.627	0.994857	2.77993	1141.55	0.956474	6.97138	144.474	0.956075	10.0789	330.086	0.968061	6.36879	75.2018	0.981099	6.11407	208.628
Acot8	0.924209	19.7364	143.716	0.92534	25.1738	390.358	0.983377	12.1284	437.161	0.983041	8.74195	230.362	0.984247	6.25082	578.211	0.977918	14.2606	750.804	0.969055	14.1321	931.926	0.963517	17.922	513.295	0.98395	12.7968	188.105	0.979426	8.55581	975.302	0.994857	2.77993	286.944	0.907182	18.5904	281.957	0.884954	28.0771	286.595	0.86993	38.2127	313.422	0.935215	25.6791	300.343
Acot9	0.930278	15.7891	526.52	0.914674	28.77	640.129	0.975066	18.1926	1081.16	0.983041	8.74195	2028.4	0.894556	62.5082	741.336	0.749697	411.18	1560.06	0.798773	307.765	1399.5	0.75272	227.012	1117.82	0.651257	204.748	557.27	0.730425	213.895	718.183	0.821756	141.777	967.6	0.813176	40.0854	315.995	0.829145	55.4342	405.795	0.840389	40.3357	664.613	0.861765	58.6951	442.124
Acox1	0.707056	138.155	388.675	0.683282	249.34	816.932	0.830112	169.798	905.619	0.919919	52.4517	971.971	0.882335	62.5082	451.204	0.910275	76.0565	820.344	0.903414	81.6519	449.18	0.919575	44.2075	528.681	0.875535	48.6277	302.959	0.871914	57.0387	497.187	0.904957	72.2782	824.186	0.562463	302.674	497.239	0.58634	319.647	629.153	0.610926	271.735	625.614	0.738531	289.807	725.448
Acox3	0.768508	76.9718	361.597	0.816185	87.5089	426.262	0.888531	97.0273	848.844	0.936662	43.7097	1142.85	0.891433	45.8393	383.202	0.699023	297.096	867.418	0.876912	81.6519	515.373	0.923284	45.4023	525.988	0.913158	38.3903	274.839	0.94719	25.6674	298.841	0.975713	16.6796	280.842	0.992746	1.1619	196.491	0.990587	2.15977	138.661	0.972914	6.36879	151.205	0.99622	1.22281	68.362
Acp1	0.754981	73.0245	336.662	0.780791	123.471	594.019	0.838881	133.413	780.705	0.932162	34.9678	840.543	0.865195	56.2574	562.27	0.959516	26.1444	787.978	0.885555	64.3794	646.722	0.946233	31.0647	917.72	0.82361	56.3057	523.406	0.938279	25.6674	307.864	0.953709	25.0194	653.015	0.64832	114.447	317.452	0.706328	103.669	453.331	0.697067	129.499	522.003	0.741678	127.173	613.314
Acp2	0.976	7.89454	403.434	0.985779	4.79501	162.44	0.983377	12.1284	357.551	0.949122	26.2258	232.623	0.973745	10.418	668.69	0.974238	16.6374	530.405	0.993123	3.14046	250.497	0.992703	3.58439	142.78	0.970814	7.67805	452.644	0.986284	5.70387	736.771	0.989713	5.55986	717.214	0.918834	14.5237	97.5193	0.965487	7.91917	129.658	0.933124	14.8605	246.563	0.967127	12.2281	160.877
Acp5	0.941556	15.7891	305.615	0.957364	20.3788	769.749	0.950132	36.3852	326.202	0.966081	17.4839	446.745	0.984247	6.25082	304.148	0.992639	4.75353	190.747	1	0	0	1	0	0	1	0	0	1	0	0	0.989713	5.55986	621.071	0.973134	4.06664	250.664	0.9749	5.7594	498.979	0.981942	4.24586	1105.13	0.977319	7.33688	113.567
Acp6	0.958847	11.8418	257.384	0.950227	16.7825	356.388	0.991689	6.06421	521.376	1	0	0	0.984247	6.25082	305.527	0.970557	19.0141	1041.53	0.939216	29.8343	549.249	0.974	14.3376	537.012	0.941628	15.3561	234.211	0.954011	22.8155	347.952	0.946333	36.1391	432.747	0.897114	18.0094	133.729	0.93064	19.438	260.049	0.939454	16.9834	538.244	0.944501	19.565	227.556
Acpp	0.947708	11.8418	513.63	0.938397	31.1675	260.22	0.960755	36.3852	804.45	0.932162	34.9678	582.456	0.921556	41.6721	315.279	0.917644	59.4191	498.599	0.93983	39.2557	619.909	0.97811	10.7532	418.511	0.970814	7.67805	321.249	0.96571	14.2597	242.414	0.969139	16.6796	1058.25	0.908746	20.3332	148.426	0.915517	26.6372	193.882	0.948421	14.8605	376.382	0.967127	12.2281	400.638
Acrbp	1	0	0	0.99289	2.3975	157.398	1	0	0	1	0	0	0.989498	4.16721	1526.56	0.981598	11.8838	653.983	0.969055	14.1321	415.235	0.944853	28.6751	484.784	0.990271	2.55935	613.497	0.948776	28.5194	314.521	0.963996	19.4595	510.973	1	0	0	0.990587	2.15977	149.43	0.990971	2.12293	122.745	0.99244	2.44563	204.56
Acsf3	0.965139	7.89454	289.663	0.989334	3.59626	226.368	0.993244	18.1926	1367.99	0.983041	8.74195	789.889	0.994749	2.08361	1587.3	0.99632	2.37676	1626.02	1	0	0	0.997568	1.1948	160.385	0.980543	5.1187	83.6193	1	0	0	0.989713	5.55986	1367.57	0.960101	6.97138	197.987	0.978037	5.7594	318.402	0.963885	8.49172	242.928	0.970891	11.0053	370.035
Acsl1	0.673913	173.68	539.677	0.731228	192.999	774.808	0.854557	151.605	797.644	0.739048	209.807	860.032	0.708122	229.197	673.073	0.758291	270.951	799.915	0.791339	210.411	653.425	0.839381	107.532	626.323	0.776839	135.646	376.611	0.649575	293.749	635.609	0.755881	269.653	1257.73	0.489963	400.274	572.212	0.492017	466.511	717.878	0.538626	437.324	755.048	0.591952	407.197	875.651
Acsl3	0.759395	92.7609	401.374	0.866711	75.5214	551.133	0.927723	60.6421	781.127	0.949122	26.2258	518.378	0.894361	50.0066	527.697	0.918253	73.6797	722.563	0.937259	56.5282	678.943	0.876771	72.8826	585.222	0.902321	38.3903	392.137	0.839571	88.41	436.785	0.841569	100.078	686.158	0.850196	51.1235	261.057	0.825009	77.7519	468.388	0.862383	57.3191	269.258	0.915295	36.6844	494.607
Acsl4	0.917694	23.6836	633.717	0.92534	25.1738	450.192	0.958444	30.321	361.55	0.983041	8.74195	225.785	0.844154	85.4279	617.133	0.831436	144.983	895.041	0.837903	160.163	632.739	0.898179	68.1035	700.274	0.746905	133.086	547.334	0.844014	122.633	565.034	0.827428	166.796	887.318	0.491917	437.454	618.717	0.486948	455.712	766.748	0.568323	382.127	725.948	0.628617	375.404	834.337
Acsl5	0.947708	11.8418	290.05	0.983212	7.19251	286.608	0.983377	12.1284	1710.86	0.966081	17.4839	613.793	0.978996	8.33443	790.238	0.89937	83.1868	778.847	0.943622	29.8343	553.48	0.931093	43.0127	648.24	0.951357	12.7968	369.005	0.85821	62.7426	299.624	0.942373	41.699	550.099	0.840267	33.695	170.596	0.904152	27.3571	313.508	0.864568	31.844	185.205	0.924398	24.4563	406.664
Acss1	0.915524	21.71	260.54	0.928609	35.9626	353.605	0.983377	12.1284	340.58	1	0	0	0.994749	2.08361	107.25	0.99632	2.37676	231.696	0.996562	1.57023	116.05	0.995136	2.38959	1019.13	1	0	0	0.993142	2.85194	333	0.989713	5.55986	397.409	0.996373	0.580948	91.2492	0.985185	4.31955	249.388	0.972914	6.36879	410.884	0.99244	2.44563	347.002
Acss2	0.956424	9.86818	162.488	0.975113	8.39126	551.625	1	0	0	1	0	0	0.989498	4.16721	1292.23	0.974238	16.6374	595.46	0.986247	6.28091	330.836	0.97811	10.7532	255.134	0.97321	10.2374	316.971	0.986284	5.70387	201.639	0.943422	30.5793	713.092	0.885222	25.5617	175.324	0.89319	31.6767	285.689	0.919405	33.9669	371.996	0.959591	14.6738	108.456
Acta2	1	0	0	0.972636	32.3663	2918.35	0.977113	24.2568	2019.02	1	0	0	0.985476	29.1705	1928.43	0.990646	14.2606	1016.85	0.969355	64.3794	2886.71	0.981981	26.2855	2653.84	0.9679	23.0342	2808.35	0.97756	28.5194	3809.88	0.979174	41.699	5412.14	0.941858	53.4473	2367.25	0.839143	205.898	3445.44	0.815271	396.988	3712.62	0.939336	89.2654	3493.19
Actb	0.443187	894.057	2719.53	0.473232	2624.07	4179.89	0.768687	1073.36	3932.56	0.822738	550.743	2626.91	0.498392	2337.81	6246.92	0.805566	810.477	4162.6	0.682012	1499.57	4636.16	0.657972	1247.37	3659.53	0.21473	3501.19	5098.31	0.739009	673.057	2624.93	0.704156	1473.36	3908.05	0.348952	4046.89	5249.7	0.360736	4056.06	7571.98	0.309688	3906.19	8928.29	0.495029	3000.79	5573.78
Actg1	0.566954	497.356	1128.37	0.539316	1063.29	2022	0.795525	485.137	2228.63	0.77669	358.42	1071.72	0.592607	995.964	1934.83	0.813844	444.455	2069.63	0.703204	814.949	1711.61	0.840861	322.595	1586.88	0.548457	755.009	1405.35	0.816674	296.601	1284.09	0.792527	606.025	1664.61	0.285088	2555.59	2594.27	0.299564	2172.01	2482.26	0.237244	2171.76	2452.41	0.381461	1936.94	2624.73
Actg2	0.661409	854.584	1634.24	0.724568	827.139	2237.29	1	0	0	1	0	0	0.978996	8.33443	1233.51	0.974238	16.6374	874.278	0.973523	14.1321	1424.93	0.982632	14.3376	1980.09	0.992091	7.67805	353.523	0.989025	22.8155	6458.83	0.945644	102.857	3646.39	0.965145	27.3046	2568.66	0.904502	129.586	3922.06	0.850584	331.177	3215.81	0.969645	41.5757	3282.28
Actl6a	0.900423	27.6309	225.358	0.928895	23.975	305.12	0.975066	18.1926	1294.21	0.983041	8.74195	580.046	0.8668	68.759	587.95	0.857331	116.461	927.03	0.850214	105.205	707.659	0.94406	27.4803	726.673	0.912442	23.0342	286.812	0.958852	17.1116	332.389	0.961582	27.7993	761.924	0.85221	29.6284	189.301	0.855541	36.7162	197.687	0.882873	38.2127	232.841	0.907843	39.13	436.583
Actn1	0.973854	5.92091	655.685	0.972623	10.7888	529.141	0.991689	6.06421	1923.08	0.966081	17.4839	716.413	0.924352	35.4213	356.782	0.969596	28.5212	620.366	0.953885	25.1237	524.174	0.973246	13.1428	881.352	0.970814	7.67805	307.749	0.958852	17.1116	681.926	0.982096	22.2395	677.934	0.835084	33.1141	213.757	0.88544	30.9568	239.994	0.894477	29.721	333.994	0.954667	22.0106	222.931
Actn4	0.762879	82.8927	424.94	0.809114	106.689	505.935	0.958444	30.321	1538.86	0.876415	96.1614	474.024	0.90082	50.0066	452.453	0.880257	92.6938	565.397	0.865913	75.371	639.301	0.905345	64.5191	575.597	0.845079	53.7464	298.643	0.828795	99.8178	714.496	0.847347	113.977	828.438	0.65403	135.361	237.547	0.693078	151.904	450.65	0.738145	142.236	355.93	0.840984	69.7004	390.62
Actr10	0.906834	23.6836	157.91	0.910789	34.7638	445.777	0.95252	42.4495	944.327	0.881284	61.1936	691.188	0.910732	35.4213	715.076	0.928654	52.2888	1053.66	0.933345	34.545	584.07	0.950426	27.4803	1248.04	0.92217	20.4748	575.337	0.958852	17.1116	596.915	0.943422	30.5793	760.132	0.858344	24.9808	204.764	0.864402	37.4361	326.639	0.83397	46.7045	247.004	0.863826	56.2494	695.359
Actr1a	0.946989	23.6836	241.167	0.920444	29.9688	395.279	0.975066	18.1926	335.023	0.983041	8.74195	345.662	0.930807	35.4213	406.32	0.928654	52.2888	906.045	0.930828	37.6855	523.23	0.948924	25.0907	555.658	0.921174	33.2716	354.082	0.914837	42.779	459.322	0.922848	41.699	645.885	0.848616	30.2093	177.193	0.885441	30.9568	311.275	0.806967	55.1962	397.676	0.8954	36.6844	326.414
Actr1b	0.828669	51.3145	386.642	0.855944	62.3351	477.836	0.908576	66.7063	851.769	0.983041	8.74195	654.879	0.970002	14.5852	305.756	0.952155	30.8979	739.294	0.963244	18.8427	654.042	0.932119	45.4023	442.229	0.951357	12.7968	98.2834	0.923164	42.779	713.298	0.929182	55.5986	486.619	0.803206	42.4092	162.963	0.821503	51.8346	366.324	0.804686	63.6879	340.637	0.918227	34.2388	368.791
Actr2	0.820073	53.2882	378.449	0.887498	51.5463	561.75	0.935998	54.5779	1357.32	0.932162	34.9678	428.992	0.861614	70.8426	646.288	0.909466	73.6797	513.85	0.902554	65.9496	479.468	0.928114	43.0127	542.112	0.892839	40.9496	291.48	0.914836	42.779	653.292	0.919348	47.2588	762.27	0.68664	85.9804	193.419	0.795704	74.1523	335.111	0.795764	65.8108	240.842	0.878793	51.3582	478.21
Actr3	0.787527	63.1564	272.274	0.802242	92.3039	565.986	0.93351	48.5137	1188.67	0.966081	17.4839	440.332	0.90082	50.0066	670.652	0.910275	76.0565	878.471	0.80615	106.776	886.369	0.913614	50.1815	854.494	0.862186	46.0683	322.403	0.871914	57.0387	501.879	0.898887	72.2782	786.021	0.574537	157.437	292.424	0.630328	179.981	475.68	0.646978	195.31	543.831	0.746543	128.395	571.07
Actr5	0.982569	3.94727	91.4043	0.975113	8.39126	755.249	0.991689	6.06421	1096.49	0.983041	8.74195	583.431	0.984247	6.25082	964.303	0.981598	11.8838	711	0.982808	7.85114	718.055	0.985407	7.16878	358.949	0.970814	7.67805	161.976	0.986284	5.70387	697.83	0.994857	2.77993	280.034	0.972069	5.80948	136.706	0.959212	9.35902	164.294	0.96628	10.6147	152.389	0.969759	9.78251	137.358
Actr6	0.921562	17.7627	440.913	0.943116	19.18	746.915	0.991689	6.06421	1533.74	0.966081	17.4839	422.776	0.968494	12.5016	787.478	0.961599	30.8979	1087.66	0.932407	40.8259	946.837	0.966719	17.922	637.232	0.961085	10.2374	856.683	0.958852	17.1116	698	0.980791	13.8997	1051.31	0.949384	11.038	165.446	0.90648	25.1974	262.371	0.954856	10.6147	280.438	0.905146	36.6844	436.209
Actr8	0.938993	13.8155	557.384	0.944252	20.3788	508.601	0.975066	18.1926	1162.59	0.983041	8.74195	184.57	0.963243	14.5852	214.352	0.971659	21.3909	553.236	0.95874	18.8427	366.995	0.972211	16.7272	463.02	0.93476	20.4748	212.974	0.972568	11.4077	598.339	0.969139	16.6796	364.36	0.891884	20.3332	164.796	0.890861	29.5169	310.286	0.900683	25.4752	296.142	0.910512	30.5703	380.592
Acvr1	0.973854	5.92091	164.965	0.982224	5.99376	233.294	0.958444	30.321	919.069	1	0	0	0.994749	2.08361	99.7307	0.99632	2.37676	493.097	0.989685	4.71069	787.967	0.995136	2.38959	900.848	1	0	0	1	0	0	1	0	0	0.970983	4.64759	94.3938	0.9749	5.7594	140.028	0.981942	4.24586	354.554	0.99244	2.44563	85.6393
Acvr1b	0.965139	7.89454	103.813	0.982224	5.99376	437.48	1	0	0	0.949122	26.2258	366.806	0.968494	12.5016	283.373	0.982622	14.2606	611.223	0.972493	12.5618	552.904	0.982975	8.36358	401.364	0.961085	10.2374	351.125	0.958852	17.1116	835.172	0.970617	19.4595	650.209	0.939502	10.4571	131.089	0.968625	7.19925	123.218	0.990971	2.12293	131.631	0.99244	2.44563	78.2144
Acvr2a	0.932887	17.7627	202.417	0.953782	15.5838	427.94	0.975066	18.1926	530.547	1	0	0	0.973745	10.418	555.256	0.966877	21.3909	593.726	0.972493	12.5618	508.197	0.975678	11.948	610.379	0.97321	10.2374	324.032	0.979426	8.55581	977.741	0.98457	8.3398	358.21	0.945593	9.29518	93.1311	0.950803	12.2387	129.307	0.942035	12.7376	99.4962	0.965979	11.0053	306.021
Acvr2b	0.973854	5.92091	168.843	0.985779	4.79501	453.938	1	0	0	0.949122	26.2258	327.682	0.978996	8.33443	252.989	0.963196	23.7676	754.271	0.976943	12.5618	508.996	0.990271	4.77919	251.541	0.990271	2.55935	79.3462	0.993142	2.85194	202.922	0.994857	2.77993	390.625	0.953988	8.13328	92.9045	0.988282	3.59962	198.917	0.963885	8.49172	1166.47	0.98866	3.66844	219.157
Acy1	0.991285	1.97364	237.925	0.978669	7.19251	493.304	0.983377	12.1284	819.015	1	0	0	0.98554	8.33443	523.52	0.992639	4.75353	733.679	0.996562	1.57023	192.976	0.97811	10.7532	547.627	0.970814	7.67805	282.454	0.951994	19.9636	821.228	0.994857	2.77993	1838.24	0.979279	4.06664	152.712	0.993725	1.43985	195.686	0.972914	6.36879	111.323	0.989664	2.44563	229.239
Acy3	0.965139	7.89454	128.012	0.971558	9.59001	619.941	0.991689	6.06421	274.801	1	0	0	0.978996	8.33443	181.341	1	0	0	0.986247	6.28091	645.095	0.981271	10.7532	1168.59	0.961085	10.2374	176.463	0.981115	11.4077	349.283	0.979426	11.1197	1158.33	0.954957	8.71423	292.443	0.925725	18.718	210.934	0.933124	14.8605	193.037	0.934254	24.4563	460.976
Acyp1	0.917694	23.6836	220.455	0.895756	44.3538	627.149	0.975066	18.1926	523.62	0.955557	43.7097	1556.82	0.865628	66.6754	823.545	0.966877	21.3909	891.437	0.905503	75.371	644.675	0.913249	44.2075	901.668	0.912442	23.0342	434.058	0.986284	5.70387	1352.55	0.958852	22.2395	1225.33	0.894528	19.7522	236.602	0.939998	16.5583	341.214	0.885467	31.844	311.098	0.939518	20.7878	505.853
Acyp2	0.982569	3.94727	180.781	0.985779	4.79501	915.24	0.991689	6.06421	439.754	0.966081	17.4839	350.973	0.959564	18.7525	920.075	0.974238	16.6374	1290.44	0.946085	26.6939	1062.34	0.956467	27.4803	1061.96	0.876588	35.8309	271.352	0.960822	19.9636	855.443	0.98457	8.3398	640.426	0.926069	13.3618	417.259	0.935131	15.8383	345.921	0.963885	8.49172	471.691	0.967127	12.2281	714.761
Adal	0.991285	1.97364	87.5427	0.982224	5.99376	369.912	0.991689	6.06421	2314.81	0.983041	8.74195	504.796	0.989498	4.16721	109.042	0.99632	2.37676	492.611	0.993123	3.14046	374.847	0.987839	5.97399	784.15	0.980543	5.1187	183.934	0.986284	5.70387	444.425	0.98457	8.3398	1596.73	0.967356	5.80948	159.463	0.971762	6.47932	380.926	0.981942	4.24586	118.242	0.985882	6.11407	897.606
Adam10	0.755181	102.629	417.096	0.79331	106.689	486.506	0.807995	163.734	873.573	0.903114	61.1936	288.937	0.838406	100.013	584.828	0.829857	140.229	889.35	0.918708	56.5282	557.733	0.904374	62.1295	686.273	0.883328	43.509	230.431	0.819578	139.745	468.865	0.886772	111.197	926.269	0.742803	72.6186	200.963	0.743909	91.4304	375.371	0.806569	63.6879	360.294	0.914491	35.4616	360.886
Adam15	0.938993	13.8155	314.703	0.946671	17.9813	524.343	0.960755	36.3852	544.657	0.983041	8.74195	286.205	0.973745	10.418	276.123	0.926393	47.5353	725.424	0.95874	18.8427	887.062	0.961085	19.1168	818.374	0.954062	15.3561	224.274	0.90616	42.779	501.563	0.963996	19.4595	253.06	0.781137	48.7997	171.061	0.791874	60.4737	361.37	0.846511	38.2127	326.394	0.900379	41.5757	327.755
Adam17	0.956424	9.86818	351.179	0.940701	21.5775	330.753	0.983377	12.1284	612.715	0.983041	8.74195	413.907	0.973745	10.418	532.541	0.956986	30.8979	703.277	0.97937	9.42137	289.728	0.96595	16.7272	403.778	0.990271	2.55935	70.3779	0.940361	28.5194	334.404	0.989713	5.55986	882.275	0.927457	11.619	106.316	0.951679	12.9586	302.413	0.945827	12.7376	408.013	0.979438	6.11407	538.469
Adam23	1	0	0	1	0	0	1	0	0	1	0	0	1	0	0	0.99632	2.37676	2155.17	1	0	0	0.982975	8.36358	129.628	0.921174	33.2716	262.089	0.993142	2.85194	223.164	0.970617	19.4595	1378.23	0.741973	66.2281	261.482	0.819105	61.9135	330.24	0.859628	50.9503	344.03	0.878793	51.3582	318.154
Adam28	0.62539	1351.94	2347.6	0.696422	1406.14	3680.66	0.971833	48.5137	2820.52	1	0	0	1	0	0	1	0	0	1	0	0	0.997568	1.1948	336.814	1	0	0	1	0	0	1	0	0	1	0	0	1	0	0	1	0	0	1	0	0
Adam7	0.119547	8001.12	8766.68	0.324839	6588.34	6998.9	0.332945	5651.84	6354.22	0.242021	3321.94	3739.68	0.523477	2254.46	3046.81	0.367689	3603.18	4450.44	0.646421	1163.54	2603.46	0.576718	2176.92	3571.69	0.577319	506.752	1387.38	0.364377	4380.57	4669.78	0.678009	1673.52	3420.48	1	0	0	0.997449	2.15977	7334.96	0.981942	4.24586	622.476	0.986628	3.66844	360.276
Adam9	0.919478	25.6573	372.734	0.93715	22.7763	458.355	0.983377	12.1284	231.793	0.983041	8.74195	345.662	0.95662	25.0033	348.645	0.961599	30.8979	979.106	0.975931	10.9916	362.641	0.958653	20.3116	434.692	0.941628	15.3561	148.175	0.882467	59.8907	270.247	0.92962	41.699	496.767	0.823751	41.2473	152.528	0.853208	45.3553	278.134	0.900683	25.4752	201.541	0.946452	22.0106	175.686
Adamts1	0.976	7.89454	852.362	0.877746	74.3226	589.485	0.970324	36.3852	1090.07	0.966081	17.4839	758.198	0.949887	43.7557	401.809	0.913342	106.954	1172.82	0.933987	94.2137	977.905	0.980543	9.55838	491.26	0.93476	20.4748	334.638	0.967617	17.1116	305.651	0.959001	38.9191	803.966	0.861515	44.1521	298.724	0.888527	41.7556	407.377	0.837576	61.565	563.214	0.904898	41.5757	402.034
Adar	0.991285	1.97364	165.044	0.948782	20.3788	223.134	0.991689	6.06421	204.541	0.966081	17.4839	405.204	0.947489	20.8361	426.526	0.960657	28.5212	647.06	0.97937	9.42137	633.871	0.970814	14.3376	267.96	0.970814	7.67805	226.919	0.938279	25.6674	215.381	0.958852	22.2395	523.126	0.943124	9.87612	103.825	0.9602	10.0789	585.992	0.954856	10.6147	225.278	0.98866	3.66844	219.201
Adat2	0.965139	7.89454	587.288	0.978669	7.19251	391.908	0.991689	6.06421	889.68	0.983041	8.74195	187.196	0.949103	22.9197	726.22	0.99632	2.37676	827.815	0.982808	7.85114	186.777	0.975678	11.948	557.785	0.941628	15.3561	397.672	0.979426	8.55581	239.912	0.974283	13.8997	902.88	0.886462	22.657	219.91	0.918146	21.5977	251.643	0.897243	23.3522	532.923	0.934254	25.6791	364.001
Adat3	0.982569	3.94727	124.907	0.968003	10.7888	395.236	0.991689	6.06421	444.642	1	0	0	0.989498	4.16721	731.149	0.985279	9.50706	1033.21	0.993123	3.14046	901.364	0.995136	2.38959	790.848	0.980543	5.1187	986.434	0.986284	5.70387	190.084	1	0	0	0.978237	3.48569	454.379	0.990587	2.15977	116.649	0.990971	2.12293	714.286	0.984879	4.89126	259.193
Adck2	0.984441	5.92091	768.041	0.982224	5.99376	716.454	0.991689	6.06421	537.924	0.983041	8.74195	187.196	0.98554	8.33443	233.022	0.959516	26.1444	1122.81	0.982808	7.85114	613.211	0.980543	9.55838	600.571	0.970814	7.67805	277.952	0.972568	11.4077	471.105	0.989713	5.55986	557.347	0.944251	8.71423	94.1367	0.956075	10.0789	345.446	0.981942	4.24586	82.5569	0.981099	6.11407	146.25
Adck3	0.976	7.89454	127.691	0.944726	27.5713	675.692	0.983377	12.1284	602.424	1	0	0	1	0	0	0.977918	14.2606	1292.11	0.993123	3.14046	398.496	0.997568	1.1948	416.493	1	0	0	1	0	0	1	0	0	0.978237	3.48569	110.942	0.988282	3.59962	236.01	0.950888	10.6147	223.784	0.978405	8.5597	120.797
Adck4	0.938993	13.8155	233.843	0.940701	21.5775	558.126	0.975066	18.1926	1187.05	0.983041	8.74195	187.196	0.968494	12.5016	852.162	0.944795	35.6515	684.612	0.959814	20.413	421.025	0.955275	25.0907	817.348	0.913158	38.3903	163.668	0.880723	57.0387	393.508	0.943345	44.4789	985.295	0.929685	13.3618	197.788	0.956075	10.0789	638.702	0.959622	8.49172	162.053	0.965979	11.0053	487.016
Adck5	0.906834	23.6836	201.051	0.939561	20.3788	693.254	0.991689	6.06421	316.756	1	0	0	0.978996	8.33443	871.477	0.974238	16.6374	688.172	0.970099	15.7023	217.881	0.942423	29.8699	405.535	0.86952	40.9496	178.543	0.960822	19.9636	777.872	0.948566	27.7993	710.452	0.814645	41.2473	195.338	0.821593	65.5132	345.262	0.838396	53.0733	359.59	0.888273	45.2441	479.444
Adcy6	0.932887	17.7627	149.889	0.93285	28.77	654.646	0.966755	24.2568	637.28	0.955557	43.7097	623.529	0.949103	22.9197	601.084	0.927585	49.9121	523.807	0.956383	21.9832	318.064	0.965546	21.5064	446.468	0.970814	7.67805	201.082	0.910847	37.0752	537.808	0.981635	16.6796	438.345	0.953595	11.038	190.959	0.942305	15.1184	377.406	0.972914	6.36879	222.712	0.964301	14.6738	186.749
Adcy7	0.973854	5.92091	126.894	0.975113	8.39126	566.703	0.983377	12.1284	1182.97	0.966081	17.4839	924.836	0.957992	16.6689	236.347	0.916748	68.9262	809.928	0.946085	26.6939	521.772	0.997568	1.1948	88.5818	1	0	0	0.993142	2.85194	315.259	1	0	0	0.996373	0.580948	93.5366	1	0	0	1	0	0	0.99244	2.44563	113.712
Adcy8	0.900423	27.6309	401.065	0.921032	37.1613	473.749	0.911154	72.7705	649.621	0.949122	26.2258	413.198	0.921234	31.2541	488.197	0.952155	30.8979	809.01	0.980357	10.9916	268.74	0.982975	8.36358	579.276	0.990271	2.55935	71.22	0.979426	8.55581	952.801	0.994857	2.77993	1680.67	1	0	0	1	0	0	1	0	0	0.99622	1.22281	100.21
Adcy9	0.973854	5.92091	256.53	0.971558	9.59001	256.576	0.983377	12.1284	569.93	1	0	0	0.984247	6.25082	284.917	0.988959	7.13029	774.22	0.989685	4.71069	368.596	0.990271	4.77919	376.686	0.980543	5.1187	118.685	0.993142	2.85194	1757.47	0.98457	8.3398	1061.99	0.96954	4.64759	93.1257	0.978037	5.03947	174.458	0.972914	6.36879	436.17	0.98866	3.66844	118.832
Add1	0.930278	15.7891	477.718	0.933599	23.975	551.963	0.95252	42.4495	776.862	1	0	0	0.963243	14.5852	305.193	0.974238	16.6374	570.917	0.951863	21.9832	549.675	0.97811	10.7532	347.63	0.941628	15.3561	106.062	0.958852	17.1116	331.552	0.98457	8.3398	357.882	0.859393	28.4665	223.058	0.924747	24.4774	214.222	0.879244	27.5981	219.506	0.950962	23.2335	218.191
Add3	0.965139	7.89454	153.572	0.952318	19.18	422.086	0.991689	6.06421	605.327	1	0	0	0.98554	8.33443	796.519	0.964327	26.1444	657.607	0.959814	20.413	385.282	0.954062	28.6751	342.546	0.91774	28.1529	270.213	0.967617	17.1116	271.301	0.948566	27.7993	821.208	0.889871	19.7522	115.712	0.93688	17.2782	191.556	0.918741	23.3522	119.381	0.939805	26.9019	287.084
Adh1	0.991285	1.97364	2427.18	0.936366	27.5713	358.926	0.983377	12.1284	1383.62	1	0	0	1	0	0	0.968881	26.1444	1071.78	0.923059	39.2557	808.758	0.884311	76.467	614.592	0.895789	46.0683	262.216	0.899313	45.631	371.438	0.906745	61.1585	456.435	0.934711	11.038	220.405	0.930975	15.8383	468.796	0.914734	25.4752	240.09	0.967127	12.2281	454.538
Adh5	0.906834	23.6836	656.9	0.865702	51.5463	518.618	0.93351	48.5137	989.841	0.949122	26.2258	634.894	0.806892	110.431	910.112	0.810437	161.62	1040.41	0.762935	246.526	1259.28	0.812402	211.479	1368.3	0.710512	353.19	756.638	0.826102	173.968	846.146	0.788374	247.414	1367.42	0.706123	126.066	524.967	0.628195	226.056	640.373	0.576457	314.194	612.452	0.581704	368.067	815.028
Adhfe1	1	0	0	0.97694	10.7888	426.675	1	0	0	1	0	0	0.98554	8.33443	2098.29	0.981598	11.8838	581.882	0.980357	10.9916	1293.74	0.985407	7.16878	530.083	0.982632	7.67805	168.266	0.986284	5.70387	239.689	0.994857	2.77993	130.976	0.961226	6.97138	100.735	0.978037	5.03947	193.053	0.972914	6.36879	436.013	0.982151	7.33688	208.394
Adi1	0.885159	33.5518	164.697	0.91249	44.3538	310.397	0.991689	6.06421	1182.03	1	0	0	0.865195	56.2574	544.889	0.94964	35.6515	958.291	0.913722	45.5366	508.826	0.940705	38.2335	554.39	0.936897	23.0342	206.395	0.986284	5.70387	581.562	0.979426	11.1197	305.275	0.902066	15.6856	198.377	0.95986	13.6786	189.586	0.941437	19.1064	363.088	0.941782	23.2335	511.426
Adig	0.904002	31.5782	336.263	0.907731	51.5463	328.224	0.93351	48.5137	1020.16	0.949122	26.2258	1189.57	0.960778	20.8361	1383.68	0.815033	194.895	826.008	0.808549	189.998	908.658	0.827538	148.155	844.404	0.785694	133.086	498.202	0.759979	142.597	853.319	0.920034	63.9384	714.253	0.902332	22.076	370.25	0.922075	21.5977	302.829	0.939454	16.9834	235.656	0.925622	25.6791	618.074
Adipor1	0.79773	76.9718	342.426	0.839885	77.9189	550.968	0.977113	24.2568	3149.01	0.983041	8.74195	397.456	0.860523	81.2607	606.43	0.919032	52.2888	707.916	0.847933	109.916	786.782	0.869928	83.6358	952.931	0.804643	76.7805	376.599	0.87389	59.8907	601.868	0.899914	75.0582	658.784	0.534431	261.427	406.605	0.681173	186.461	446.753	0.587372	182.572	474.105	0.774333	165.08	509.022
Adipor2	0.874446	33.5518	268.913	0.948782	20.3788	295.636	1	0	0	1	0	0	0.973745	10.418	332.245	0.97532	19.0141	434.923	0.939216	29.8343	483.688	0.936547	35.8439	390.237	0.913158	38.3903	192.93	0.917705	34.2232	305.391	0.925902	47.2588	839.995	0.742145	62.1615	247.935	0.780005	77.032	281.527	0.833162	59.4421	318.212	0.896642	44.0213	342.336
Adk	0.930278	15.7891	515.226	0.93285	28.77	577.426	0.991689	6.06421	173.913	0.915203	43.7097	1371.37	0.88914	52.0902	459.926	0.835288	118.838	1091.95	0.851257	97.3542	855.377	0.912973	48.9867	754.905	0.869081	56.3057	314.636	0.933527	31.3713	580.585	0.936128	41.699	763.532	0.767592	51.1235	239.749	0.763657	70.5526	340.335	0.797683	67.9338	325.244	0.822422	90.4882	643.81
Adm	0.982569	3.94727	325.628	0.929331	29.9688	719.573	0.991689	6.06421	2659.57	0.798024	236.033	1050.89	0.885205	68.759	859.858	0.924985	54.6656	967.374	0.940154	53.3878	1112.94	0.98369	9.55838	1052.89	0.980543	5.1187	234.453	0.972568	11.4077	670.483	0.950402	50.0388	768.841	0.941461	22.076	469.359	0.943743	34.5564	643.904	0.922222	40.3357	278.168	0.959509	22.0106	567.452
Adnp	0.867914	37.4991	286.622	0.845394	65.9314	488.535	0.931339	72.7705	630.8	0.953298	34.9678	387.839	0.886407	58.341	402.998	0.858296	106.954	800.438	0.893884	64.3794	536.74	0.948361	35.8439	672.711	0.941628	15.3561	372.902	0.889268	57.0387	645.995	0.909074	52.8187	693.632	0.85813	30.7903	165.06	0.856609	40.3158	280.557	0.889942	38.2127	342.715	0.902957	34.2388	382.701
Adnp2	0.941556	15.7891	282.364	0.99289	2.3975	374.007	1	0	0	1	0	0	0.978996	8.33443	596.032	0.961599	30.8979	748.784	0.972493	12.5618	301.637	0.986106	8.36358	519.268	0.980543	5.1187	226.604	0.979426	8.55581	243.236	0.994857	2.77993	119.374	0.978237	3.48569	90.6755	0.984312	3.59962	131.486	0.981942	4.24586	607.313	0.970891	11.0053	392.861
Ado	0.848418	39.4727	422.796	0.883124	58.7388	507.483	0.905039	84.8989	656.433	0.983041	8.74195	311.526	0.859947	58.341	568.885	0.917644	59.4191	702.381	0.908607	51.8175	615.758	0.973246	13.1428	494.841	0.931899	17.9155	122.685	0.945137	22.8155	478.221	0.945017	33.3592	469.018	0.763054	45.314	164.804	0.878355	32.3966	251.797	0.881027	38.2127	418.662	0.930149	31.7932	855.862
Adora1	1	0	0	0.996445	1.19875	159.693	1	0	0	1	0	0	0.978996	8.33443	160.904	0.963196	23.7676	524.165	0.964859	21.9832	500.845	0.951548	37.0387	422.148	0.939811	28.1529	213.012	0.926689	34.2232	285.673	0.960392	25.0194	1075.97	0.715119	94.6946	255.708	0.794449	90.7105	309.017	0.787055	97.6548	432.286	0.865737	52.581	337.583
Adora2b	1	0	0	0.989334	3.59626	167.026	1	0	0	0.936662	43.7097	518.953	0.963243	14.5852	709.375	0.982622	14.2606	1139.92	0.993123	3.14046	364.577	0.995136	2.38959	1562.71	0.990271	2.55935	349.04	0.940361	28.5194	567.93	0.979426	11.1197	1061.74	0.996373	0.580948	362.188	1	0	0	0.990971	2.12293	94.5358	0.99622	1.22281	849.618
Adpgk	0.958847	11.8418	218.445	0.954901	16.7825	448.153	0.975066	18.1926	1243.82	0.949122	26.2258	944.292	0.957992	16.6689	493.627	0.960657	28.5212	741.56	0.964124	20.413	506.453	0.978849	11.948	274.518	0.961085	10.2374	302.982	0.938279	25.6674	449.014	0.98457	8.3398	1007.29	0.947746	9.87612	282.378	0.984312	3.59962	407.938	0.972914	6.36879	434.951	0.981099	6.11407	612.058
Adprh	0.941556	15.7891	217.798	0.97694	10.7888	745.958	0.96896	30.321	497.048	0.915203	43.7097	513.473	0.954335	20.8361	772.831	0.970557	19.0141	981.456	0.969055	14.1321	535.18	0.968448	21.5064	803.864	0.951357	12.7968	247.965	0.951994	19.9636	527.285	0.943422	30.5793	931.184	0.893493	18.5904	167.652	0.926661	18.718	297.186	0.912486	23.3522	205.998	0.935215	26.9019	304.413
Adprhl2	0.845931	37.4991	351.476	0.918759	33.5651	348.917	1	0	0	0.983041	8.74195	1035.2	0.945211	27.0869	342.559	0.985279	9.50706	528.143	0.973523	14.1321	469.582	0.976425	13.1428	415.334	0.963667	12.7968	314.3	0.951994	19.9636	260.2	0.974283	13.8997	255.383	0.926069	13.9428	258.389	0.927837	17.2782	387.19	0.891655	25.4752	594.854	0.940726	20.7878	442.32
Adprm	0.991285	1.97364	441.112	0.957337	14.385	698.39	0.983377	12.1284	860.996	1	0	0	0.989498	4.16721	310.652	0.985279	9.50706	583.382	0.975931	10.9916	505.69	0.990271	4.77919	365.373	0.941628	15.3561	305.435	0.972568	11.4077	375.766	0.994857	2.77993	190.84	0.956474	6.97138	116.652	0.975839	6.47932	325.509	1	0	0	0.973539	8.5597	952.389
Adra2c	0.924209	19.7364	342.752	0.903705	37.1613	552.209	0.927723	60.6421	577.633	0.983041	8.74195	219.443	0.994749	2.08361	170.94	0.992639	4.75353	526.136	0.993123	3.14046	550.849	0.975678	11.948	651.371	0.990271	2.55935	83.3333	0.960822	19.9636	421.243	0.98457	8.3398	362.483	1	0	0	1	0	0	1	0	0	1	0	0
Adrb2	0.982569	3.94727	285.51	0.983212	7.19251	310.758	1	0	0	1	0	0	1	0	0	0.992639	4.75353	2676.76	0.996562	1.57023	116.05	0.960729	23.8959	726.921	0.931678	33.2716	333.168	0.948776	28.5194	668.475	0.936128	41.699	939.206	0.972907	5.80948	385.399	0.967263	9.35902	308.333	0.942955	23.3522	271.036	0.961986	23.2335	229.929
Adrbk1	0.958847	11.8418	127.843	0.914674	28.77	324.089	0.991689	6.06421	203.128	1	0	0	0.973745	10.418	213.502	0.959516	26.1444	763.67	0.975931	10.9916	579.65	0.985407	7.16878	323.034	0.970814	7.67805	375.296	0.972568	11.4077	363.01	0.98457	8.3398	338.473	0.905694	15.1047	135.395	0.965487	7.91917	230.679	0.918741	19.1064	207.49	0.973539	8.5597	578.892
Adrbk2	0.973854	5.92091	92.8607	0.989334	3.59626	848.28	1	0	0	1	0	0	1	0	0	1	0	0	0.996562	1.57023	105.53	1	0	0	0.990271	2.55935	116.212	0.993142	2.85194	123.244	0.994857	2.77993	2481.39	0.958558	8.13328	131.723	0.963331	9.35902	412.685	0.954856	10.6147	117.559	0.973539	8.5597	145.162
Adrm1	0.762879	82.8927	219.763	0.787461	103.093	613.665	0.95252	42.4495	1135.21	0.932162	34.9678	866.871	0.855218	70.8426	434.94	0.896649	76.0565	1218.23	0.895849	69.0901	924.673	0.89237	68.1035	637.425	0.834348	71.6618	436.837	0.892465	48.4829	521.359	0.937303	44.4789	553.072	0.709072	79.009	233.106	0.762124	87.1109	435.497	0.735318	93.4089	367.248	0.797967	101.494	535.733
Adsl	0.941556	15.7891	639.992	0.960892	13.1863	671.806	0.983377	12.1284	371.65	0.983041	8.74195	187.196	0.968494	12.5016	573.191	0.974238	16.6374	1402.39	0.970099	15.7023	486.211	0.971574	15.5324	329.187	0.951357	12.7968	99.8423	0.972568	11.4077	745.689	0.989713	5.55986	881.149	0.929685	12.7809	191.49	0.933761	18.718	267.434	0.924179	16.9834	149.267	0.938019	23.2335	171.121
Adss	0.928001	23.6836	188.432	0.866651	52.7451	556.889	0.975066	18.1926	427.906	0.983041	8.74195	593.472	0.88914	52.0902	470.341	0.923198	61.7959	837.163	0.912022	59.6687	638.219	0.923868	46.5971	587.726	0.867654	53.7464	225.935	0.942013	31.3713	435.197	0.934754	38.9191	554.906	0.681957	90.047	284.238	0.77378	82.7913	337.084	0.777588	95.5319	507.904	0.848835	61.1407	362.386
Adtrp	1	0	0	0.996445	1.19875	104.91	0.991689	6.06421	543.478	1	0	0	0.989498	4.16721	1601.41	0.99632	2.37676	1976.28	0.996562	1.57023	94.7239	0.995136	2.38959	113.842	0.980543	5.1187	105.08	0.993142	2.85194	315.259	0.948566	27.7993	1212.37	0.909449	20.3332	166.199	0.90691	22.3177	235.947	0.912936	42.4586	322.698	0.880766	46.4669	294.888
Aebp1	0.958847	11.8418	1139.08	0.871423	59.9376	562.851	0.925199	54.5779	936.071	0.949122	26.2258	802.128	0.949103	22.9197	652.571	0.988959	7.13029	1358.27	0.97937	9.42137	2125.13	0.990917	5.97399	997.845	0.961085	10.2374	837.686	1	0	0	0.989713	5.55986	978.269	0.982873	3.48569	415.802	0.98272	5.7594	728.489	0.939454	16.9834	386.882	0.979181	9.78251	1430.7
Aebp2	0.865774	35.5255	278.868	0.897565	40.7576	489.978	0.966755	24.2568	803.103	0.949122	26.2258	1014.94	0.922905	33.3377	394.07	0.920119	78.4332	1181.44	0.929015	42.3962	599.559	0.923167	59.7399	487.746	0.878421	53.7464	385.588	0.880723	57.0387	567.459	0.827542	111.197	936.104	0.782087	52.8663	197.9	0.797848	68.3929	294.397	0.858037	65.8108	356.01	0.935215	25.6791	339.666
Aen	0.965139	7.89454	140.954	0.936006	21.5775	383.747	0.966755	24.2568	1089.85	0.881284	61.1936	537.819	0.858606	77.0935	580.267	0.886167	111.708	939.697	0.852675	91.0733	506.552	0.908658	58.5451	842.429	0.86952	40.9496	487.015	0.931421	28.5194	321.875	0.950146	30.5793	1103.64	0.792475	43.5711	285.313	0.860622	44.6353	439.611	0.838396	50.9503	184.303	0.924861	30.5703	577.155
Aes	0.868303	51.3145	392.969	0.872091	61.1363	414.529	0.93351	48.5137	980.341	0.915203	43.7097	1308.65	0.808161	129.184	519.513	0.879919	104.578	738.567	0.820942	182.147	610.285	0.773028	228.206	874.974	0.572606	299.444	605.802	0.776872	111.226	585.832	0.865798	116.757	777.96	0.47125	263.17	434.731	0.657104	166.303	436.195	0.607972	186.818	454.873	0.721593	182.199	564.874
Afap1	0.973854	5.92091	724.552	0.952318	19.18	475.029	1	0	0	1	0	0	0.989498	4.16721	93.3391	0.985279	9.50706	394.131	0.966673	17.2725	395.256	0.990271	4.77919	169.257	0.990271	2.55935	966.184	0.96571	14.2597	813.071	0.986521	13.8997	1033.33	0.903258	16.8475	175.34	0.925191	20.8778	147.979	0.959058	14.8605	137.001	0.96336	13.451	466.817
Afap1l2	0.991285	1.97364	82.2707	0.975113	8.39126	217.986	0.975066	18.1926	590.743	1	0	0	0.984247	6.25082	513.944	0.974238	16.6374	792.21	0.97937	9.42137	496.197	0.97811	10.7532	520.348	0.961085	10.2374	789.863	0.979426	8.55581	158.186	0.994857	2.77993	83.8785	0.972907	5.80948	147.49	0.982076	5.03947	311.199	0.942035	12.7376	125.853	0.977319	7.33688	363.207
Aff1	0.895417	23.6836	231.293	0.903554	43.1551	409.627	0.983377	12.1284	220.53	0.966081	17.4839	278.435	0.899579	47.923	339.025	0.89396	80.81	729.877	0.904697	61.2389	657.385	0.949714	26.2855	432.168	0.955885	17.9155	155.612	0.914837	42.779	656.416	0.963996	19.4595	551.635	0.814979	45.314	210.412	0.825323	51.8346	341.511	0.863163	42.4586	185.103	0.886265	48.9126	326.988
Aff2	0.991285	1.97364	526.593	0.964448	11.9875	192.163	0.983377	12.1284	203.027	1	0	0	1	0	0	0.99632	2.37676	257.069	0.982808	7.85114	306.548	0.973246	13.1428	686.155	0.970814	7.67805	443.846	0.967617	17.1116	269.544	0.989713	5.55986	407.064	0.979279	4.06664	186.351	0.996862	0.719925	143.761	0.990971	2.12293	2061.86	1	0	0
Aff4	0.731799	94.7345	247.549	0.683569	192.999	642.75	0.863723	115.22	853.816	0.915203	43.7097	588.536	0.736093	170.856	740.976	0.773145	266.198	879.151	0.836857	111.486	714.794	0.848746	109.921	751.599	0.79281	94.696	319.994	0.811151	114.077	559.753	0.815662	164.016	766.944	0.632311	142.913	320.702	0.685936	133.906	472.809	0.713174	125.253	431.956	0.843039	90.4882	502.313
Afg3l1	0.78561	61.1827	348.916	0.851162	68.3289	592.897	0.925199	54.5779	1197.58	0.881284	61.1936	857.089	0.743207	175.023	613.041	0.80107	173.504	885.714	0.833739	177.436	759.427	0.927815	48.9867	596.719	0.833266	53.7464	265.605	0.848394	74.1503	388.121	0.862816	77.8381	705.364	0.758591	58.6758	232.822	0.840855	52.5545	375.901	0.808304	67.9338	295.281	0.875087	59.9179	549.856
Afg3l2	0.898141	25.6573	234.109	0.911888	43.1551	400.804	0.93351	48.5137	766.338	0.966081	17.4839	293.855	0.928147	31.2541	297.603	0.95064	38.0282	825.224	0.950466	26.6939	652.136	0.953789	22.7012	496.116	0.944422	17.9155	318.251	0.945137	22.8155	216.91	0.974283	13.8997	560.882	0.907992	19.1713	250.552	0.91111	25.9173	325.804	0.897243	23.3522	148.488	0.958418	13.451	511.955
Afmid	0.991285	1.97364	71.8649	0.996445	1.19875	160.102	0.991689	6.06421	1402.52	1	0	0	0.989498	4.16721	134.396	0.986255	11.8838	396.561	0.989685	4.71069	195.968	0.963517	17.922	369.884	0.941628	15.3561	212.599	0.979426	8.55581	233.172	0.965508	22.2395	471.899	0.964843	6.39043	167.559	0.9548	12.2387	285.187	0.981942	4.24586	94.2259	0.973539	8.5597	471.472
Aftph	0.88144	41.4464	349.987	0.915357	41.9563	374.114	0.975066	18.1926	374.109	0.983041	8.74195	184.57	0.938629	27.0869	370.439	0.925959	57.0424	587.214	0.943622	29.8343	398.34	0.960729	23.8959	304.824	0.91774	28.1529	162.594	0.951994	19.9636	257.669	0.96327	33.3592	426.383	0.801467	47.6378	166.467	0.821626	60.4737	277.967	0.84916	48.8274	365.686	0.907868	33.016	271.776
Aga	0.919477	25.6573	321.942	0.931079	26.3725	934.052	0.896789	90.9631	877.974	0.873324	87.4195	760.747	0.934791	31.2541	451.421	0.821316	154.49	874.086	0.867613	70.6603	691.217	0.925083	43.0127	536.487	0.888844	35.8309	369.147	0.827914	82.7061	486.594	0.896525	66.7184	762.416	0.893493	18.5904	422.1	0.865944	38.156	444.927	0.912486	23.3522	466.971	0.886265	48.9126	443.816
Agap1	0.924209	19.7364	163.241	0.896619	39.5588	316.241	0.975066	18.1926	945.463	1	0	0	0.952741	18.7525	678.43	0.965243	28.5212	689.261	0.959814	20.413	843.86	0.957438	29.8699	500.822	0.941628	15.3561	273.249	0.96571	14.2597	322.867	0.965508	22.2395	495.274	0.94922	8.13328	119.975	0.964152	10.0789	185.171	0.950274	16.9834	226.739	0.975481	11.0053	515.253
Agap3	0.947708	11.8418	588.152	0.946671	17.9813	363.049	0.983377	12.1284	418.019	0.983041	8.74195	600.24	0.931736	27.0869	437.535	0.971659	21.3909	703.682	0.97937	9.42137	209.918	0.990271	4.77919	537.682	0.990271	2.55935	113.766	0.986284	5.70387	386.909	0.994857	2.77993	168.379	0.981864	2.90474	251.71	0.963331	9.35902	180.13	0.972914	6.36879	326.127	0.979438	6.11407	128.121
Agbl3	0.96048	13.8155	592.05	0.96554	13.1863	460.183	0.983377	12.1284	1044.82	1	0	0	0.973745	10.418	256.343	0.966877	21.3909	895.629	0.975931	10.9916	1039.58	0.995136	2.38959	1285.45	0.980543	5.1187	86.2669	1	0	0	0.979426	11.1197	421.28	0.909914	17.4285	243.026	0.938266	15.1184	368.35	0.930473	21.2293	389.007	0.925622	26.9019	516.886
Agfg1	0.941556	15.7891	274.869	0.945245	21.5775	806.504	0.983377	12.1284	299.422	0.966081	17.4839	464.689	0.96594	18.7525	413.99	0.94964	35.6515	655.096	0.972493	12.5618	122.659	0.980543	9.55838	593.546	0.961085	10.2374	848.478	0.993142	2.85194	229.41	0.958852	22.2395	387.265	0.905694	15.6856	208.82	0.918959	22.3177	247.067	0.910552	19.1064	189.616	0.95582	15.8966	481.551
Agfg2	0.976	7.89454	178.756	0.940701	21.5775	472.402	0.975066	18.1926	935.552	0.966081	17.4839	978.81	0.96594	18.7525	521.293	0.916748	68.9262	765.157	0.959814	20.413	705.389	0.925699	44.2075	760.042	0.925083	23.0342	202.067	0.843289	79.8542	704.154	0.914071	63.9384	701.536	0.82636	64.4853	218.587	0.837543	69.1128	302.189	0.842	57.3191	357.877	0.926443	33.016	327.512
Aggf1	0.915524	21.71	256.323	0.925809	31.1675	314.484	0.966755	24.2568	888.46	1	0	0	0.943867	25.0033	456.762	0.941114	38.0282	861.043	0.935782	31.4046	619.723	0.934331	32.2595	718.934	0.912442	23.0342	469.739	0.951994	19.9636	548.025	0.965508	22.2395	177.302	0.862396	31.3712	186.542	0.866702	35.2763	294.374	0.8785	46.7045	434.81	0.92672	26.9019	198.505
Agl	0.956424	9.86818	168.144	0.968003	10.7888	488.684	0.983377	12.1284	461.43	0.949122	26.2258	402.059	0.984247	6.25082	154.903	0.985279	9.50706	373.111	0.986247	6.28091	807.284	0.995136	2.38959	1167.22	1	0	0	0.979426	8.55581	326.526	0.980791	13.8997	1910.03	0.952205	9.87612	110.737	0.950803	12.2387	313.642	0.963885	8.49172	86.8452	0.979181	9.78251	181.756
Ago1	0.982569	3.94727	156.399	0.953153	20.3788	501.095	1	0	0	0.983041	8.74195	1890.36	0.959564	18.7525	179.881	0.967994	23.7676	1082.22	0.987159	7.85114	482.586	0.984224	10.7532	346.406	0.980543	5.1187	833.919	0.981115	11.4077	312.635	0.979426	11.1197	228.343	0.946746	9.29518	252.76	0.952937	10.7989	179.948	0.945827	12.7376	181.935	0.974651	9.78251	491.146
Ago2	0.973854	5.92091	1064.53	0.954901	16.7825	296.848	0.991689	6.06421	2298.85	1	0	0	0.978996	8.33443	763.889	0.977918	14.2606	686.851	0.975931	10.9916	162.175	0.96595	16.7272	476.44	0.980543	5.1187	140.632	0.951994	19.9636	574.759	0.974283	13.8997	320.712	0.94787	8.13328	91.7951	0.967416	7.19925	232.903	0.981942	4.24586	156.087	0.996797	2.44563	142.136
Ago3	0.956424	9.86818	306.064	0.996445	1.19875	334.448	1	0	0	0.983041	8.74195	361.925	0.968494	12.5016	277.008	0.989865	9.50706	452.574	0.982808	7.85114	556.47	0.980543	9.55838	523.525	0.980543	5.1187	524.534	0.986284	5.70387	743.762	0.994857	2.77993	1680.67	0.963728	5.80948	257.749	0.99136	2.8797	184.893	0.981942	4.24586	170.669	0.984879	4.89126	88.7651
Ago4	0.991285	1.97364	285.959	0.996445	1.19875	263.435	0.991689	6.06421	236.518	1	0	0	0.964787	16.6689	506.499	0.988959	7.13029	466.632	0.972493	12.5618	494.868	0.992703	3.58439	1078.13	0.980543	5.1187	76.8556	0.993142	2.85194	250.689	0.994857	2.77993	1620.75	0.950368	8.71423	189.244	0.971762	6.47932	153.811	0.96628	10.6147	120.722	0.973539	8.5597	506.221
Agpat1	0.938993	13.8155	94.5657	0.948782	20.3788	295.425	0.983377	12.1284	235.465	0.983041	8.74195	617.284	0.957992	16.6689	485.481	0.934938	45.1585	847.917	0.955396	28.2641	369.166	0.974	14.3376	633.158	0.902713	25.5935	278.335	0.993142	2.85194	207.684	0.979426	11.1197	585.401	0.836646	37.7617	227.541	0.881482	30.9568	181.531	0.921483	21.2293	190.396	0.905146	35.4616	366.974
Agpat2	0.947708	11.8418	325.132	0.947803	19.18	572.168	0.977113	24.2568	227.189	0.983041	8.74195	252.08	0.940004	29.1705	255.256	0.949326	47.5353	978.76	0.939216	29.8343	516.286	0.990271	4.77919	824.508	1	0	0	0.993142	2.85194	229.41	0.98457	8.3398	267.557	0.892794	21.4951	253.009	0.939998	16.5583	363.681	0.972914	6.36879	782.572	0.962199	12.2281	211.092
Agpat3	0.818129	51.3145	488.977	0.793014	152.241	655.298	0.692955	357.788	963.583	0.852407	148.613	680.476	0.72672	177.107	612.001	0.863614	97.4474	655.045	0.852445	100.495	624.125	0.893876	71.6878	746.45	0.857165	40.9496	285.028	0.855611	88.41	340.644	0.932225	47.2588	349.538	0.826658	40.0854	182.815	0.884618	38.8759	315.535	0.825168	40.3357	286.199	0.89655	37.9072	345.229
Agpat4	1	0	0	0.996445	1.19875	77.2499	1	0	0	1	0	0	0.994749	2.08361	318.573	0.94502	47.5353	932.408	0.959867	29.8343	252.316	0.973605	20.3116	1178.35	0.954062	15.3561	203.163	0.948776	28.5194	709.038	0.970617	19.4595	1009.95	0.980023	4.64759	212.792	1	0	0	0.990971	2.12293	259.067	0.99244	2.44563	75.2286
Agpat5	0.956424	9.86818	111.17	0.957337	14.385	462.269	0.983377	12.1284	205.216	0.949122	26.2258	224.757	0.968494	12.5016	244.611	0.92023	54.6656	801.088	0.981063	12.5618	755.275	0.954574	23.8959	608.603	0.93476	20.4748	336.128	0.968902	19.9636	521.085	0.965508	22.2395	334.93	0.967356	5.22854	100.751	0.97037	8.6391	500.15	0.990971	2.12293	70.8767	0.984879	4.89126	307.122
Agpat6	0.915524	21.71	324.582	0.924516	35.9626	425.548	0.975066	18.1926	1745.56	0.983041	8.74195	230.362	0.928147	31.2541	430.563	0.906627	66.5494	809.865	0.914785	56.5282	720.309	0.85656	93.1942	717.481	0.821958	69.1025	320.231	0.796463	116.929	580.452	0.857675	80.618	656.97	0.680939	99.9231	233.371	0.730722	103.669	385.977	0.799456	67.9338	409.099	0.799397	89.2654	416.595
Agpat9	1	0	0	1	0	0	1	0	0	1	0	0	1	0	0	0.988959	7.13029	353.501	0.993123	3.14046	383.175	0.992703	3.58439	828.529	1	0	0	0.986284	5.70387	294.055	0.994857	2.77993	1275.51	0.938338	9.87612	140.763	0.9749	5.7594	148.501	0.972914	6.36879	181.337	0.99244	2.44563	91.6611
Agps	0.956424	9.86818	190.264	0.961995	14.385	699.892	0.975066	18.1926	233.368	0.949122	26.2258	301.271	0.959564	18.7525	744.39	0.992639	4.75353	347.926	0.972493	12.5618	359.171	0.992703	3.58439	420.626	0.970814	7.67805	91.024	0.993142	2.85194	106.701	0.989713	5.55986	181.487	0.943124	9.87612	99.3907	0.946662	12.2387	139.297	0.900683	25.4752	244.025	0.954639	14.6738	505.644
Agr2	0.947708	11.8418	848.857	0.916062	35.9626	1091.05	0.730979	388.109	1357.06	0.852407	148.613	753.97	0.871983	66.6754	819.473	0.992639	4.75353	859.275	1	0	0	1	0	0	1	0	0	1	0	0	1	0	0	1	0	0	1	0	0	1	0	0	1	0	0
Agrn	0.904132	21.71	254.402	0.93715	22.7763	430.414	0.950132	36.3852	988.777	1	0	0	0.97108	16.6689	436.729	0.97251	23.7676	1079.65	0.989685	4.71069	196.914	0.990271	4.77919	123.411	1	0	0	0.993142	2.85194	217.912	0.989713	5.55986	107.427	0.964843	6.39043	147.721	0.993725	1.43985	159.814	0.959622	8.49172	309.585	0.98866	3.66844	153.494
Agt	0.991285	1.97364	2398.08	0.97969	8.39126	1000.25	0.950132	36.3852	412.873	0.326194	1022.81	1456.63	0.559659	497.982	960.906	0.933208	78.4332	1692.32	0.89309	194.708	1475.76	1	0	0	1	0	0	1	0	0	0.994857	2.77993	1254.71	1	0	0	1	0	0	1	0	0	1	0	0
Agtpbp1	1	0	0	0.978669	7.19251	234.892	0.975066	18.1926	467.11	1	0	0	0.973745	10.418	785.28	0.959516	26.1444	642.364	0.947889	29.8343	589.112	0.975678	11.948	548.722	0.980543	5.1187	267.486	0.967617	17.1116	848.353	0.994857	2.77993	83.8785	0.953988	8.13328	121.921	0.96235	8.6391	226.59	0.981942	4.24586	294.24	0.971765	12.2281	282.952
Agtrap	0.906834	23.6836	342.26	0.891391	44.3538	417.002	0.950132	36.3852	790.977	0.864324	69.9356	508.409	0.886186	47.923	520.329	0.996882	4.75353	2219.76	0.977698	14.1321	254.775	0.950426	27.4803	495.654	0.941628	15.3561	313.465	0.921644	39.9271	331.072	0.939886	36.1391	1139.47	0.796386	40.0854	182.203	0.850382	42.4756	385.908	0.864568	33.9669	322.929	0.93234	28.1247	336.787
Ahctf1	0.938993	13.8155	235.801	0.916897	31.1675	332.256	0.966755	24.2568	658.568	0.953298	34.9678	435.12	0.909014	54.1738	514.516	0.895058	97.4474	788.648	0.931654	39.2557	499.894	0.948652	29.8699	357.624	0.954062	15.3561	248.822	0.923163	42.779	509.951	0.927992	38.9191	519.047	0.871931	31.9522	141.995	0.907871	23.0376	283.757	0.906233	23.3522	132.695	0.938964	25.6791	418.988
Ahcy	0.956424	9.86818	150.797	0.989334	3.59626	328.669	0.991689	6.06421	2652.52	1	0	0	0.978996	8.33443	1227.65	0.992639	4.75353	296.703	0.993123	3.14046	104.282	0.973246	13.1428	670.59	0.951357	12.7968	436.315	0.972568	11.4077	249.727	0.979426	11.1197	267.865	0.902066	16.2666	118.578	0.939178	15.8383	289.079	0.942035	12.7376	293.937	0.973539	8.5597	192.867
Ahcyl1	0.794236	59.2091	344.743	0.890277	49.1488	426.476	0.950132	36.3852	1270.15	0.949122	26.2258	358.909	0.874983	72.9262	369.581	0.859233	109.331	581.863	0.920894	51.8175	773.763	0.931623	44.2075	599.374	0.910114	33.2716	252.296	0.897131	42.779	398.544	0.950146	30.5793	535.022	0.778274	49.9616	128.943	0.863321	48.9549	278.761	0.847316	48.8274	312.081	0.901381	37.9072	331.117
Ahcyl2	0.958847	11.8418	168.579	0.943116	19.18	250.072	0.991689	6.06421	234.412	1	0	0	0.984247	6.25082	331.904	0.99632	2.37676	254.001	0.993123	3.14046	188.316	0.992703	3.58439	156.434	1	0	0	1	0	0	1	0	0	0.987049	3.48569	155.96	0.990587	2.15977	250.737	1	0	0	0.98866	3.66844	95.5661
Ahdc1	0.947708	11.8418	162.369	0.957337	14.385	572.522	0.958444	30.321	1168.72	0.983041	8.74195	311.526	0.976189	14.5852	243.205	0.970557	19.0141	817.354	0.987159	7.85114	203.693	0.974	14.3376	508.273	0.970814	7.67805	110.611	0.951994	19.9636	365.009	0.974283	13.8997	282.748	0.989118	1.74285	115.462	0.978037	5.03947	266.501	0.963885	8.49172	156.674	0.99244	2.44563	637.438
Ahi1	0.921562	17.7627	354.982	0.939069	25.1738	542.131	0.977113	24.2568	2274.48	0.983041	8.74195	219.443	0.949103	22.9197	490.219	0.964327	26.1444	780.764	0.975931	10.9916	159.747	0.978849	11.948	1024.29	0.951357	12.7968	707.018	0.975513	17.1116	813.597	0.994857	2.77993	269.687	0.945028	11.038	236.632	0.956217	13.6786	242.521	0.981942	4.24586	419.876	0.99244	2.44563	225.608
Ahnak	0.889444	27.6309	625.437	0.842763	83.9126	521.761	0.894569	84.8989	1000.75	0.932162	34.9678	376.414	0.895392	64.5918	610.402	0.90303	116.461	861.794	0.899517	124.048	667.568	0.790414	225.817	849.643	0.807712	107.493	380.115	0.748396	199.636	627.866	0.810772	191.815	986.678	0.63221	160.923	305.938	0.692088	149.024	425.426	0.772724	110.392	384.584	0.877488	62.3635	605.353
Ahr	0.950212	13.8155	680.937	0.954901	16.7825	584.965	0.983377	12.1284	461.042	0.983041	8.74195	952.381	0.941167	31.2541	621.224	0.938514	54.6656	546.926	0.966005	25.1237	621.648	0.976425	13.1428	574.392	0.980543	5.1187	251.663	0.945137	22.8155	604.684	0.96903	38.9191	1459.93	0.926538	16.8475	293.291	0.96235	9.35902	359.505	0.977497	14.8605	679.479	0.981099	6.11407	692.185
Ahsa1	0.902354	29.6045	140.67	0.913349	32.3663	504.306	0.983377	12.1284	1581.2	1	0	0	0.90023	39.5885	626.206	0.922713	49.9121	762.859	0.899942	59.6687	809.67	0.939992	31.0647	650.791	0.883256	30.7122	250.143	0.924563	31.3713	558.535	0.938279	33.3592	988.689	0.869204	23.2379	271.226	0.889992	28.0771	262.945	0.900683	25.4752	194.866	0.90236	37.9072	660.98
Ahsa2	0.973854	5.92091	142.971	0.943116	19.18	253.52	0.983377	12.1284	1175.29	0.985631	17.4839	691.324	0.942239	22.9197	543.818	0.897283	90.3171	642.171	0.925475	36.1153	583.713	0.938305	39.4283	885.186	0.886297	33.2716	469.239	0.944434	37.0752	481.107	0.965508	22.2395	732.76	0.907182	18.5904	117.091	0.904738	23.7575	290.03	0.876455	33.9669	118.31	0.931958	23.2335	111.722
AI314180	0.900423	27.6309	456.751	0.903705	37.1613	362.427	0.960755	36.3852	532.685	0.969723	26.2258	1524.34	0.943867	25.0033	234.092	0.901593	90.3171	701.829	0.942651	28.2641	455.017	0.943813	32.2595	432.822	0.91963	30.7122	174.996	0.896064	54.1868	641.176	0.922047	52.8187	711.495	0.741019	80.7518	185.384	0.707969	124.547	407.598	0.779467	101.901	427.443	0.852017	83.1513	466.954
AI413582	0.848418	39.4727	209.331	0.887498	51.5463	484.961	0.93351	48.5137	877.857	0.864324	69.9356	647.841	0.950718	43.7557	775.918	0.959516	26.1444	1170.41	0.926337	45.5366	883.928	0.953487	27.4803	767.165	0.808577	53.7464	421.265	0.94719	25.6674	423.362	0.958852	22.2395	322.301	0.717677	62.7424	244.351	0.879042	41.0357	312.917	0.809905	67.9338	289.173	0.858035	61.1407	589.171
AI464131	0.991285	1.97364	138.581	0.971558	9.59001	154.047	0.991689	6.06421	316.756	0.983041	8.74195	989.12	0.994749	2.08361	177.148	0.89396	80.81	921.388	0.956383	21.9832	249.419	0.990271	4.77919	375.146	1	0	0	0.96571	14.2597	197.362	0.979426	11.1197	298.307	0.989118	1.74285	126.984	0.993725	1.43985	236.614	0.990971	2.12293	243.25	0.99622	1.22281	222.42
AI661453	1	0	0	1	0	0	1	0	0	1	0	0	0.952741	18.7525	282.423	0.981598	11.8838	684.263	0.993862	4.71069	443.116	0.980543	9.55838	898.977	0.980543	5.1187	492.169	0.979426	8.55581	948.739	0.974283	13.8997	423.169	0.926069	13.3618	141.225	0.946228	15.1184	425.496	0.954856	10.6147	223.373	0.958418	13.451	438.261
AI837181	0.947708	11.8418	124.118	0.931079	26.3725	486.962	1	0	0	0.983041	8.74195	580.046	0.952741	18.7525	418.401	0.966877	21.3909	534.509	0.975931	10.9916	214.544	0.961862	20.3116	264.765	0.975272	15.3561	166.799	0.972568	11.4077	452.05	0.974283	13.8997	256.568	0.957608	7.55233	228.85	0.946662	12.2387	393.995	0.963885	10.6147	290.948	0.973539	8.5597	205.598
AI846148	0.991285	1.97364	78.8022	0.969939	13.1863	268.765	0.983377	12.1284	1445.65	1	0	0	0.986653	12.5016	436.006	0.974238	16.6374	425.714	0.953885	25.1237	480.547	0.98369	9.55838	417.759	0.961085	10.2374	130.086	0.979426	8.55581	832.3	0.969139	16.6796	777.659	0.944251	8.71423	115.178	0.961165	8.6391	205.054	0.954856	12.7376	109.057	0.947078	18.3422	383.651
AI987944	0.991285	1.97364	212.947	0.964448	11.9875	297.271	0.983377	12.1284	612.368	0.983041	8.74195	503.778	0.973745	10.418	455.434	0.981598	11.8838	529.194	0.978276	15.7023	515.769	0.971574	15.5324	911.892	0.990271	2.55935	155.352	0.972568	11.4077	204.524	0.969139	16.6796	1072.03	0.903588	19.7522	181.791	0.916604	23.7575	310.947	0.900683	23.3522	225.578	0.933175	23.2335	297.221
Aida	0.956424	9.86818	132.877	0.985779	4.79501	690.895	0.991689	6.06421	900.09	0.966081	17.4839	1027.01	0.968494	12.5016	252.275	0.981598	11.8838	395.293	0.980357	10.9916	354.757	0.986106	8.36358	287.942	0.951357	12.7968	324.806	0.972568	11.4077	314.789	0.970617	19.4595	289.252	0.921273	19.7522	162.489	0.93605	16.5583	142.851	0.909712	21.2293	322.027	0.95681	18.3422	403.321
Aifm1	0.906834	23.6836	253.608	0.939561	20.3788	285.664	0.975066	18.1926	925.018	0.881284	61.1936	456.882	0.858222	56.2574	804.386	0.886636	85.5635	728.129	0.919566	48.6771	347.65	0.948652	29.8699	575.63	0.93476	20.4748	978.142	0.885615	51.3348	526.327	0.941233	38.9191	401.336	0.868472	26.1427	204.437	0.883113	32.3966	302.384	0.842966	42.4586	174.718	0.887843	39.13	407.617
Aifm2	0.982569	3.94727	147.7	0.99289	2.3975	134.592	0.983377	12.1284	386.376	1	0	0	1	0	0	1	0	0	1	0	0	0.997568	1.1948	69.3963	0.990271	2.55935	155.352	0.979426	8.55581	269.928	1	0	0	0.956474	6.97138	152.023	0.96235	8.6391	345.526	0.972914	6.36879	622.967	0.965979	11.0053	257.537
Aig1	0.982569	3.94727	237.081	0.964448	11.9875	182.565	0.983377	12.1284	639.312	0.966081	17.4839	298.866	0.942239	22.9197	1349.96	0.963196	23.7676	1019.46	0.935782	31.4046	312.071	0.919046	48.9867	664.554	0.871805	43.509	281.634	0.865063	59.8907	551.213	0.950146	30.5793	354.956	0.856733	26.7236	188.741	0.897501	24.4774	401.618	0.831369	46.7045	329.688	0.91164	33.016	313.455
Aim1	0.991285	1.97364	1766.78	0.978669	7.19251	410.471	1	0	0	0.983041	8.74195	184.57	0.984247	6.25082	797.133	0.99632	2.37676	729.927	0.986247	6.28091	634.901	0.96595	16.7272	654.132	0.990271	2.55935	166.722	0.94719	25.6674	463.243	0.961582	27.7993	522.827	0.908984	16.8475	132.934	0.9602	10.7989	138.014	0.918741	19.1064	242.043	0.967127	12.2281	197.62
Aimp1	0.782427	69.0773	448.594	0.801272	106.689	358.67	0.93351	48.5137	1058.14	0.949122	26.2258	534.74	0.81604	91.6787	691.762	0.929617	54.6656	613.332	0.898014	75.371	449.186	0.899576	64.5191	743.252	0.798242	84.4586	404.992	0.926689	34.2232	696.815	0.929182	55.5986	389.026	0.653476	98.7612	304.683	0.690994	112.308	375.874	0.692265	167.712	445.116	0.74768	130.841	572.368
Aimp2	0.950212	13.8155	529.64	0.93245	22.7763	621.867	0.983377	12.1284	902.296	0.932162	34.9678	468.759	0.922905	33.3377	725.233	0.944795	35.6515	720.391	0.919629	40.8259	797.935	0.96012	22.7012	753.465	0.925083	23.0342	513.475	0.993142	2.85194	248.694	0.963996	19.4595	642.179	0.888057	24.3998	321.092	0.838685	46.0752	358.264	0.81597	48.8274	493.863	0.875002	46.4669	575.219
Aip	0.947708	11.8418	344.302	0.897565	40.7576	337.446	0.983377	12.1284	198.936	0.983041	8.74195	219.443	0.943867	25.0033	175.175	0.944795	35.6515	924.628	0.941854	34.545	299.957	0.944853	28.6751	879.678	0.915396	25.5935	512.473	0.96571	14.2597	337.096	0.960392	25.0194	1178.76	0.868134	22.657	284.511	0.875227	33.1165	292.422	0.887878	33.9669	344.288	0.909868	35.4616	422.762
AK010878	0.982569	3.94727	102.894	0.954901	16.7825	450.712	1	0	0	0.983041	8.74195	565.611	0.957992	16.6689	434.946	0.970557	19.0141	838.134	0.968232	20.413	638.817	0.953789	22.7012	563.673	0.930526	30.7122	201.138	0.979426	8.55581	816.347	0.958852	22.2395	928.442	0.891884	20.3332	218.131	0.952449	13.6786	240.087	0.891655	29.721	288.19	0.981099	6.11407	394.102
Ak1	0.778929	94.7345	429.179	0.723387	194.198	714.173	0.927723	60.6421	1020.44	0.949122	26.2258	978.559	0.92347	45.8393	420.368	1	0	0	0.996562	1.57023	985.222	0.997568	1.1948	356.506	1	0	0	1	0	0	0.989713	5.55986	1809.69	0.996373	0.580948	71.7978	0.996862	0.719925	575.043	0.981942	4.24586	344.305	1	0	0
AK129341	0.958847	11.8418	181.738	0.928895	23.975	581.886	0.96896	30.321	895.218	0.966081	17.4839	1141.7	0.957992	16.6689	404.203	0.985279	9.50706	368.343	0.972493	12.5618	596.844	0.973246	13.1428	511.768	0.961085	10.2374	366.904	0.986284	5.70387	510.136	0.989713	5.55986	1514.01	0.932255	11.619	107.341	0.925725	18.718	252.702	0.957367	12.7376	149.489	0.959591	14.6738	484.216
Ak2	0.906834	23.6836	405.158	0.896619	39.5588	533.719	0.983377	12.1284	669.922	0.983041	8.74195	230.362	0.940004	29.1705	533.498	0.959516	26.1444	860.85	0.941072	32.9748	676.502	0.96012	22.7012	505.297	0.886297	33.2716	325.235	0.96571	14.2597	380.318	0.974283	13.8997	717.104	0.820705	35.4379	218.304	0.86356	39.5959	235.002	0.894477	27.5981	235.439	0.910512	30.5703	361.316
Ak3	0.898141	25.6573	345.245	0.898626	49.1488	342.92	0.985162	18.1926	1946.62	1	0	0	0.975205	12.5016	686.233	0.974238	16.6374	813.437	0.962178	17.2725	846.345	0.927837	37.0387	552.986	0.898491	33.2716	294.106	0.940361	28.5194	601.756	0.974283	13.8997	480.222	0.835516	27.8855	124.785	0.90251	25.9173	325.974	0.891655	27.5981	290.114	0.927709	28.1247	345.976
Ak4	0.965139	7.89454	159.899	0.957337	14.385	336.829	0.983377	12.1284	205.216	0.983041	8.74195	413.907	0.957992	16.6689	494.22	0.933272	52.2888	667.305	0.944482	31.4046	519.381	0.976425	13.1428	523.186	0.951357	12.7968	171.668	0.986284	5.70387	189.515	0.979426	11.1197	414.799	0.996373	0.580948	85.7045	0.993725	1.43985	135.178	1	0	0	0.99622	1.22281	1381.22
Ak6	0.965139	7.89454	131.613	0.944252	20.3788	314.864	0.983377	12.1284	559.217	1	0	0	0.977383	18.7525	1251.21	0.974238	16.6374	1102.13	0.934671	29.8343	598.209	0.964962	20.3116	671.347	0.941628	15.3561	232.994	0.993142	2.85194	692.521	0.975713	16.6796	1326.43	0.85221	29.6284	340.587	0.852542	43.9154	442.445	0.840389	40.3357	253.284	0.881452	41.5757	550.498
Akap1	0.965139	7.89454	184.13	0.976159	9.59001	218.032	0.975066	18.1926	588.408	0.966081	17.4839	202.006	0.894361	50.0066	517.408	0.896649	76.0565	584.515	0.938458	36.1153	631.275	0.946233	31.0647	521.18	0.961085	10.2374	168.753	0.938279	25.6674	388.996	0.955271	27.7993	367.376	0.960101	6.39043	102.901	0.971762	7.19925	184.696	0.990971	2.12293	76.3942	0.984879	4.89126	298.85
Akap10	0.973854	5.92091	255.272	0.959379	16.7825	340.746	0.991689	6.06421	801.925	1	0	0	0.98554	8.33443	1394.5	0.985279	9.50706	866.76	0.986247	6.28091	150.871	0.985407	7.16878	409.362	0.980543	5.1187	93.2947	0.951994	19.9636	301.738	1	0	0	0.939502	10.4571	97.6046	0.969589	7.91917	186.732	0.972914	6.36879	201.875	0.989591	4.89126	782.418
Akap11	0.86334	33.5518	233.062	0.920444	29.9688	484.308	0.960755	36.3852	599.982	0.949122	26.2258	385.447	0.915214	41.6721	345.052	0.904512	85.5635	792.459	0.898375	56.5282	499.092	0.929276	39.4283	404.31	0.92217	20.4748	154.042	0.913005	39.9271	390.63	0.934197	52.8187	726.722	0.75186	80.7518	227.532	0.790108	76.312	361.027	0.729503	99.7777	368.847	0.861765	59.9179	479.713
Akap12	0.938993	13.8155	1055.73	0.943321	32.3663	1663.87	0.958444	30.321	1826.14	0.966081	17.4839	488.543	0.909014	54.1738	617.445	0.95064	38.0282	1200.89	0.865988	127.189	1335.77	0.974	14.3376	1286.92	0.970814	7.67805	326.435	0.986284	5.70387	968.567	0.980791	13.8997	591.144	0.798304	70.8757	303.013	0.806895	68.3929	455.514	0.816275	131.622	774.826	0.884302	70.9232	438.489
Akap13	0.965139	7.89454	178.493	0.93285	28.77	520.542	0.958444	30.321	998.866	0.983041	8.74195	389.712	0.9556	22.9197	395.052	0.954296	35.6515	598.91	0.927608	48.6771	502.307	0.964962	20.3116	552.899	0.931899	17.9155	162.092	0.921644	39.9271	561.366	0.934754	38.9191	901.688	0.786055	48.7997	188.08	0.840458	56.8741	281.389	0.872172	57.3191	488.427	0.934254	24.4563	373.419
Akap17b	0.976	7.89454	160.108	0.982224	5.99376	746.615	1	0	0	0.983041	8.74195	1097.69	0.995551	4.16721	199.461	0.99632	2.37676	914.913	0.983764	9.42137	713.878	0.97811	10.7532	631.908	0.980543	5.1187	104.995	0.986284	5.70387	114.972	0.989713	5.55986	1026.49	0.914133	14.5237	110.533	0.919454	19.438	297.418	0.921483	23.3522	144.193	0.965979	11.0053	572.059
Akap2	1	0	0	0.987306	7.19251	1395.27	0.991689	6.06421	316.756	1	0	0	0.975205	12.5016	1072.88	0.978975	16.6374	1270.65	0.941854	34.545	693.899	0.98369	9.55838	554.184	0.980543	5.1187	1483.96	0.986284	5.70387	304.303	0.985836	11.1197	1608.79	0.977187	8.71423	500.546	0.959212	9.35902	757.003	0.924179	16.9834	741.323	0.977319	7.33688	1751.72
Akap7	0.982569	3.94727	196.461	0.968003	10.7888	618.92	1	0	0	1	0	0	0.984247	6.25082	223.049	0.981598	11.8838	746.722	0.973523	14.1321	975.613	0.992703	3.58439	367.641	1	0	0	0.986284	5.70387	785.415	0.994857	2.77993	365.497	0.952847	7.55233	194.755	0.972715	7.19925	148.073	0.963885	8.49172	766.681	0.99244	2.44563	161.63
Akap8	0.917694	23.6836	277.997	0.905176	33.5651	594.833	0.977113	24.2568	1706.12	0.966081	17.4839	769.488	0.894556	62.5082	288.984	0.912247	68.9262	552.173	0.926337	45.5366	553.887	0.923284	45.4023	611.529	0.891	38.3903	387.319	0.910847	37.0752	451.897	0.943422	30.5793	778.618	0.884664	22.076	160.791	0.900234	26.6372	360.067	0.910731	33.9669	306.172	0.918068	28.1247	488.554
Akap8l	0.806419	61.1827	336.484	0.840178	64.7326	609.547	0.93351	48.5137	1213.47	0.953298	34.9678	462.144	0.864731	77.0935	566.988	0.936925	49.9121	638.242	0.923059	39.2557	802.02	0.935352	39.4283	537.235	0.834612	43.509	364.727	0.954011	22.8155	258.069	0.943422	30.5793	749.119	0.796053	42.9902	217.62	0.841419	53.2744	363.599	0.818697	65.8108	486.031	0.870706	59.9179	410.789
Akap9	0.720509	92.7609	315.696	0.741251	141.453	623.154	0.888531	97.0273	862.724	0.915203	43.7097	826.838	0.750075	179.19	600.987	0.789749	166.374	884.564	0.848615	125.618	637.243	0.870703	78.8566	630.582	0.806619	63.9838	313.236	0.829673	85.5581	697.647	0.907939	63.9384	601.691	0.663856	133.618	238.134	0.669887	167.023	373.361	0.74587	178.326	450.039	0.812736	155.297	459.456
Akip1	0.973854	5.92091	73.3109	0.993653	3.59626	242.78	0.991689	6.06421	599.52	0.983041	8.74195	410.509	0.963243	14.5852	282.804	0.988959	7.13029	467.198	0.970927	17.2725	264.553	0.986605	9.55838	526.894	0.961085	10.2374	541.722	0.986284	5.70387	284.892	1	0	0	0.903588	19.1713	265.476	0.901605	24.4774	222.564	0.882626	29.721	430.736	0.939518	19.565	167.954
Akirin1	0.912496	29.6045	305.701	0.858615	53.9438	384.243	0.950132	36.3852	1213.33	0.932162	34.9678	310.47	0.912417	37.5049	984.554	0.933754	42.7818	1084.44	0.895849	69.0901	621.993	0.903934	54.9607	720.23	0.865248	71.6618	447.725	0.955517	25.6674	328.357	0.945017	33.3592	554.089	0.694529	72.6186	181.458	0.8048	71.9925	377.547	0.787927	80.6714	459.92	0.860944	58.6951	533.57
Akirin2	0.80949	53.2882	233.513	0.819767	94.7014	487.643	0.916887	60.6421	1184.15	0.932162	34.9678	1126.09	0.820394	100.013	649.754	0.881972	85.5635	636.162	0.861331	92.6435	602.896	0.896639	64.5191	625.429	0.77031	76.7805	455.675	0.899313	45.631	451.41	0.919348	47.2588	577.024	0.660231	109.218	276.213	0.686444	127.427	457.1	0.732146	125.253	345.851	0.788778	101.494	570.593
Akr1a1	0.583279	773.665	1125.57	0.671251	673.699	1163.12	0.931161	145.541	1994.94	0.966081	17.4839	480.736	0.739596	260.451	938.461	0.737105	266.198	1042.01	0.714302	306.195	1048.47	0.726458	327.374	1187.18	0.579288	291.766	753.187	0.755497	199.636	643.347	0.72451	275.213	939.328	0.433776	438.616	682.38	0.484624	436.994	831.754	0.471267	418.217	835.141	0.496455	551.489	1017.96
Akr1b10	0.982569	3.94727	650.183	0.99289	2.3975	334.304	0.983377	12.1284	611.687	1	0	0	0.978996	8.33443	476.044	0.971659	21.3909	940.581	0.955301	20.413	548.145	0.985407	7.16878	291.022	0.970814	7.67805	157.703	0.986284	5.70387	566.078	0.974283	13.8997	647.682	0.776853	48.2187	224.555	0.792088	69.1128	312.74	0.752905	89.1631	308.07	0.783028	114.944	626.703
Akr1b3	0.982569	3.94727	500.41	0.964448	11.9875	370.417	0.983377	12.1284	1035.83	0.966081	17.4839	619.293	0.968494	12.5016	258.004	0.966877	21.3909	773.668	0.976943	12.5618	185.647	0.951357	23.8959	613.033	0.931899	17.9155	181.642	0.926689	34.2232	551.537	0.974283	13.8997	1020.72	0.981864	2.90474	183.024	0.978037	5.03947	131.313	0.990971	2.12293	211.595	0.978405	8.5597	1007.05
Akr1b7	0.976	7.89454	977.576	0.996445	1.19875	2096.44	0.992958	12.1284	2197.8	1	0	0	0.991102	8.33443	833.8	0.955836	28.5212	433.811	1.90799e-07	182.147	1169.51	0.864795	84.8306	2415.24	0.79603	696.144	2817.71	0.971866	62.7426	5077.28	0.692174	3802.95	16691.4	0.0136474	33125.1	35079.9	6.32734e-08	50039.1	49420.4	0	71434.5	69121.5	0	96654.9	90564.8
Akr1c12	0.991285	1.97364	451.671	0.996445	1.19875	701.262	0.991689	6.06421	276.855	1	0	0	0.989498	4.16721	1821.34	0.906627	66.5494	873.713	0.888057	80.0817	669.08	0.906354	53.7659	880.745	0.839259	61.4244	373.974	0.938279	25.6674	285.814	0.957509	33.3592	599.564	0.97461	4.06664	158.498	0.985185	4.31955	597.889	0.975312	4.24586	91.2423	0.98866	3.66844	75.3096
Akr1c13	0.96048	13.8155	221.78	0.964448	11.9875	227.144	0.991689	6.06421	2118.64	0.983041	8.74195	372.301	0.994749	2.08361	2267.57	0.911314	66.5494	707.002	0.864684	91.0733	1132.44	0.814865	140.986	973.515	0.699969	171.477	540.213	0.798918	105.522	748.774	0.809914	144.556	762.532	0.917115	16.2666	497.095	0.915558	31.6767	344.589	0.900683	27.5981	212.791	0.94123	28.1247	626.544
Akr1c18	0.976	7.89454	498.047	0.989334	3.59626	926.885	1	0	0	0.983041	8.74195	1517.45	0.994749	2.08361	192.938	0.964327	26.1444	1114.67	0.936184	51.8175	969.615	1	0	0	0.990271	2.55935	277.624	0.993142	2.85194	106.701	1	0	0	0.981864	2.90474	311.422	0.980536	7.91917	216.428	0.96628	10.6147	129.196	0.973006	14.6738	266.238
Akr1c19	0.973854	5.92091	173.49	0.978669	7.19251	504.725	1	0	0	0.983041	8.74195	868.81	0.984247	6.25082	900.105	0.853886	228.169	865.362	0.832277	133.469	743.249	0.789562	164.882	943.115	0.770548	115.171	462.592	0.794371	154.005	727.234	0.825767	186.255	1071.03	0.981864	2.90474	182.548	0.977137	7.91917	312.028	0.975312	4.24586	76.0387	1	0	0
Akr1cl	1	0	0	1	0	0	1	0	0	1	0	0	1	0	0	1	0	0	1	0	0	1	0	0	1	0	0	1	0	0	0.978441	30.5793	1049.53	0.48591	335.207	638.881	0.554639	318.927	798.577	0.581534	358.775	965.497	0.465899	530.701	1196.78
Akr1e1	0.915524	21.71	325.493	0.947803	19.18	424.948	0.991689	6.06421	1022.49	0.983041	8.74195	224.467	0.984247	6.25082	248.556	0.985279	9.50706	1326.77	0.962178	17.2725	477.091	0.961085	19.1168	614.272	0.896001	30.7122	267.336	0.979426	8.55581	906.352	0.989713	5.55986	346.893	0.877441	22.657	303.814	0.898472	25.1974	321.794	0.903483	27.5981	415.2	0.904096	35.4616	598.599
Akr7a5	0.781309	197.364	438.502	0.81271	245.744	888.678	0.917983	181.926	1823.37	0.855195	166.097	776.893	0.632634	664.671	1322.7	0.798556	194.895	850.559	0.795051	224.543	1309.39	0.757497	213.869	955.766	0.587534	220.104	579.352	0.803623	162.56	764.804	0.861569	122.317	734.284	0.530259	179.513	400.862	0.598821	207.338	524.058	0.529872	303.579	602.861	0.654262	232.335	725.241
Akt1	0.938993	13.8155	134.655	0.950227	16.7825	318.135	0.991689	6.06421	1788.91	0.983041	8.74195	225.785	0.984247	6.25082	320.727	0.966877	21.3909	622.086	0.947889	29.8343	484.371	0.961862	20.3116	583.329	0.980543	5.1187	1373.56	0.94719	25.6674	534.158	0.979426	11.1197	131.551	0.847418	32.5331	200.747	0.865842	35.2763	281.497	0.930473	19.1064	122.823	0.940726	20.7878	415.859
Akt1s1	0.886701	25.6573	238.613	0.91523	34.7638	624.036	0.950132	36.3852	677.08	0.915203	43.7097	384.634	0.890421	54.1738	298.029	0.933754	42.7818	587.547	0.905198	53.3878	632.43	0.922662	44.2075	528.017	0.944422	17.9155	723.38	0.945137	22.8155	406.248	0.92962	41.699	1224.11	0.69561	77.2661	251.294	0.761907	72.7124	247.094	0.738252	97.6548	338.386	0.83578	75.8145	724.425
Akt2	0.973854	5.92091	805.269	0.920444	29.9688	514.364	0.991689	6.06421	599.52	1	0	0	0.928147	31.2541	498.444	0.969596	28.5212	1034.92	0.969055	14.1321	305.775	0.943813	32.2595	431.849	0.941628	15.3561	197.868	0.931421	28.5194	434.384	0.960392	25.0194	785.068	0.881987	22.657	217.359	0.93725	14.3985	310.723	0.954856	12.7376	174.482	0.973539	8.5597	332.501
Akt3	1	0	0	0.99289	2.3975	80.6877	0.991689	6.06421	478.469	1	0	0	0.989498	4.16721	227.048	0.99632	2.37676	266.667	0.993862	4.71069	116.713	0.995136	2.38959	620.777	0.970814	7.67805	148.931	0.993142	2.85194	174.917	0.989713	5.55986	965.191	0.923423	15.1047	165.753	0.943525	12.9586	177.5	0.957367	12.7376	186.879	0.984879	4.89126	336.63
Aktip	0.740221	69.0773	381.415	0.82023	105.49	537.704	0.91328	78.8347	989.081	0.919919	52.4517	885.604	0.89297	47.923	426.852	0.882787	99.8241	760.706	0.888965	62.8091	682.985	0.903523	48.9867	620.78	0.808747	66.5431	399.261	0.899313	45.631	783.08	0.938317	47.2588	678.255	0.719017	77.2661	333.067	0.778442	79.9117	288.036	0.791419	59.4421	264.191	0.828367	77.0373	428.835
Alad	0.773577	193.416	429.06	0.779372	326.061	809.024	0.877719	297.146	1290.68	0.874357	201.065	915.756	0.765572	352.13	1001.25	0.749396	627.466	1997.27	0.723085	719.165	1848.84	0.735187	608.152	1499.58	0.597204	639.838	984.335	0.670404	570.387	1082.21	0.660043	689.423	1595.69	0.451994	373.55	736.029	0.48876	451.393	821.903	0.481879	441.57	907.418	0.54986	457.332	972.079
Alas1	0.926309	21.71	320.62	0.905176	33.5651	556.029	0.958444	30.321	873.426	0.966081	17.4839	731.141	0.940004	29.1705	427.985	0.914977	64.1726	868.561	0.919238	58.0985	911.557	0.937561	32.2595	954.83	0.955885	17.9155	119.957	0.938279	25.6674	588.835	0.974283	13.8997	655.434	0.942961	12.7809	223.631	0.901605	24.4774	320.659	0.912486	23.3522	384.243	0.940726	20.7878	401.645
Alcam	0.977848	11.8418	168.65	0.946118	22.7763	337.788	0.977113	24.2568	520.102	0.722613	218.549	875.016	0.777131	139.602	521.108	0.97251	23.7676	977.513	0.942318	47.1069	630.731	0.990271	4.77919	784.083	0.925083	23.0342	322.126	0.993142	2.85194	159.566	0.98457	8.3398	311.835	0.896575	23.8189	151.817	0.921065	24.4774	355.326	0.921483	23.3522	425.324	0.969759	9.78251	437.344
Aldh16a1	0.956424	9.86818	105.654	0.960892	13.1863	212.364	0.992958	12.1284	2928.26	0.966081	17.4839	703.749	0.989498	4.16721	584.741	0.981598	11.8838	740.126	0.962178	17.2725	383.967	0.987839	5.97399	368.756	0.970814	7.67805	91.7333	0.979426	8.55581	287.791	0.974283	13.8997	1161.06	0.985491	2.32379	380.499	0.96235	8.6391	228.59	0.950888	10.6147	100.145	0.973539	8.5597	447.303
Aldh18a1	0.956424	9.86818	527.156	0.960892	13.1863	251.833	0.975066	18.1926	560.418	0.983041	8.74195	654.879	0.973745	10.418	256.76	0.985279	9.50706	906.906	0.986247	6.28091	1026.91	0.992703	3.58439	1564.19	0.990271	2.55935	538.793	0.993142	2.85194	598.802	0.979426	11.1197	516.307	0.981864	2.90474	101.364	0.984312	3.59962	87.3667	1	0	0	0.993251	3.66844	117.629
Aldh1a1	0.676385	410.516	655.388	0.730603	473.507	878.383	0.951554	97.0273	1153.31	0.972021	43.7097	1257.18	0.909429	114.598	761.034	0.820551	430.194	1314.44	0.775325	574.704	1619.06	0.728871	698.956	1622.74	0.61372	424.852	997.166	0.695788	544.72	1044.47	0.779607	408.65	1215.23	0.771272	63.3234	321.908	0.771707	118.068	442.514	0.807114	87.0401	425.661	0.853605	75.8145	635.76
Aldh1a7	0.787802	138.155	489.179	0.708741	332.054	762.162	0.855445	121.284	828.131	1	0	0	0.968494	12.5016	492.209	0.964327	26.1444	425.474	0.976943	12.5618	719.029	0.964135	25.0907	386.371	0.905702	28.1529	440.464	0.967617	17.1116	659.46	0.989713	5.55986	311.748	0.981864	2.90474	371.475	0.979857	4.31955	943.36	1	0	0	1	0	0
Aldh2	0.757499	110.524	396.49	0.745215	210.98	895.241	0.838881	133.413	860.292	0.809986	131.129	643.457	0.83694	112.515	1051.28	0.717947	308.979	1072.61	0.77508	197.849	1181.8	0.821537	167.272	1006.94	0.586789	191.951	510.217	0.708931	191.08	674.873	0.739107	200.155	842.508	0.693939	90.628	268.088	0.659919	135.346	445.546	0.657316	148.605	371.568	0.774682	106.385	611.818
Aldh3a2	0.886701	25.6573	180.816	0.952318	19.18	244.151	0.983377	12.1284	1136.6	0.983041	8.74195	397.456	0.973745	10.418	438.188	0.97532	19.0141	998.227	0.950466	26.6939	445.427	0.984224	10.7532	303.948	0.970814	7.67805	257.321	0.986284	5.70387	297.191	0.990817	8.3398	220.304	0.843861	27.8855	178.851	0.90179	28.0771	286.193	0.909712	21.2293	168.678	0.934254	24.4563	401.94
Aldh4a1	0.921562	17.7627	202.237	0.920444	29.9688	494.373	0.975066	18.1926	705.106	0.983041	8.74195	1097.69	0.978996	8.33443	303.309	0.966877	21.3909	662.159	0.961477	23.5534	365.842	0.973246	13.1428	526.474	0.941628	15.3561	186.699	0.981115	11.4077	1222.98	0.961582	27.7993	671.24	0.946746	9.29518	96.7469	0.935131	15.8383	284.81	0.963885	8.49172	217.774	0.95582	15.8966	148.565
Aldh5a1	0.930278	15.7891	237.112	0.982224	5.99376	608.14	0.991689	6.06421	236.518	1	0	0	0.943867	25.0033	268.644	0.967994	23.7676	387.649	0.987723	9.42137	1453.85	0.958317	25.0907	518.315	0.951357	12.7968	313.537	0.958852	17.1116	241.124	0.965508	22.2395	638.203	0.970983	4.64759	292.797	0.971762	6.47932	159.754	0.954856	10.6147	90.8544	0.984879	4.89126	405.04
Aldh6a1	0.74988	92.7609	410.622	0.739135	128.266	579.054	0.84931	133.413	1108.94	0.881284	61.1936	542.874	0.701674	225.03	749.604	0.75444	235.3	856.461	0.788281	193.138	868.255	0.822288	138.596	758.751	0.709333	102.374	495.1	0.724071	191.08	577.868	0.784673	158.456	749.539	0.736939	58.0948	166.903	0.826718	62.6335	309.504	0.831403	57.3191	473.314	0.845084	62.3635	460.781
Aldh7a1	0.904002	31.5782	388.058	0.857828	58.7388	394.455	0.927723	60.6421	852.326	0.966081	17.4839	489.713	0.84348	72.9262	728.576	0.933272	52.2888	812.689	0.884235	54.958	755.268	0.896722	71.6878	678.228	0.801139	71.6618	313.444	0.847674	88.41	596.809	0.909074	52.8187	591.097	0.895493	20.3332	220.605	0.90251	25.1974	309.748	0.867441	36.0898	214.959	0.933175	23.2335	406.896
Aldh9a1	0.952001	15.7891	241.548	0.972623	10.7888	235.122	0.991689	6.06421	1098.9	0.949122	26.2258	644.399	0.970002	14.5852	818.031	0.99632	2.37676	1222.49	0.993123	3.14046	1387.84	0.990917	5.97399	441.862	0.951357	12.7968	186.6	0.958852	17.1116	484.932	0.980791	13.8997	354.947	0.868108	29.0474	206.182	0.893986	28.797	208.09	0.891655	27.5981	354.328	0.935738	20.7878	310.984
Aldoa	0.809268	167.759	600.975	0.8252	257.732	791.655	0.94561	133.413	1941.17	0.985631	17.4839	623.053	0.887833	175.023	823.318	0.944814	97.4474	1203.62	0.877016	224.543	1007.18	0.838289	221.038	1071.44	0.762001	217.545	1055.16	0.887047	94.1139	884.471	0.921311	102.857	704.329	0.767121	138.847	369.627	0.797226	156.944	560.492	0.838598	150.728	535.159	0.904926	118.613	579.3
Aldoc	0.840127	69.0773	323.183	0.882438	44.3538	652.291	0.983377	12.1284	1389.08	0.983041	8.74195	2024.29	0.957992	16.6689	266.389	0.982622	14.2606	932.371	0.953885	25.1237	977.637	0.954574	23.8959	516.451	0.944422	17.9155	211.794	0.967617	17.1116	827.102	0.989713	5.55986	480.628	0.976473	5.22854	184.97	0.971762	6.47932	151.437	0.945827	14.8605	386.952	0.989591	4.89126	160.755
Alg1	0.982569	3.94727	1107.56	0.957364	20.3788	524.417	0.950132	36.3852	1030.48	0.966081	17.4839	770.972	0.968494	12.5016	728.582	0.955836	28.5212	756.071	0.951863	21.9832	853.758	0.96012	22.7012	532.733	0.915396	25.5935	130.321	0.914836	42.779	461.586	0.965508	22.2395	597.069	0.944137	10.4571	149.821	0.935131	15.8383	213.364	0.936798	14.8605	135.836	0.958419	14.6738	411.245
Alg11	0.926309	21.71	452.335	0.950227	16.7825	263.774	0.966755	24.2568	713.081	0.932162	34.9678	372.168	0.963243	14.5852	383.143	0.948475	33.2747	711.202	0.95874	18.8427	504.923	0.96595	16.7272	682.753	0.941628	15.3561	163.98	0.899313	45.631	310.328	0.969139	16.6796	362.404	0.899632	17.4285	126.132	0.9056	28.0771	337.437	0.945827	12.7376	182.755	0.960558	17.1194	216.911
Alg12	0.965139	7.89454	639.462	0.982224	5.99376	135.982	1	0	0	1	0	0	0.994749	2.08361	74.6547	0.992639	4.75353	360.661	0.986247	6.28091	517.374	0.986106	8.36358	808.047	1	0	0	0.951994	19.9636	425.996	0.974283	13.8997	786.663	0.97461	4.06664	94.2995	0.985185	4.31955	277.567	0.954856	10.6147	194.785	0.985882	6.11407	145.513
Alg13	0.982569	3.94727	567.146	0.961995	14.385	235.533	0.958444	30.321	924.098	1	0	0	0.989498	4.16721	145.141	0.992639	4.75353	803.307	0.989685	4.71069	238.093	0.992703	3.58439	147.976	1	0	0	1	0	0	0.989713	5.55986	327.906	0.947746	9.87612	252.094	0.981175	4.31955	469.611	0.957367	12.7376	316.491	0.96336	13.451	748.747
Alg14	0.982569	3.94727	450.606	0.99289	2.3975	306.293	0.958444	30.321	861.565	0.966081	17.4839	585.287	0.968494	12.5016	596.441	0.970557	19.0141	608.177	0.975931	10.9916	250.331	0.988515	7.16878	726.88	0.990271	2.55935	83.3333	0.972568	11.4077	208.944	1	0	0	0.938338	9.87612	189.794	0.946662	12.2387	284.732	0.939454	16.9834	478.389	0.958418	13.451	509.204
Alg2	0.930278	15.7891	166.728	0.964448	11.9875	227.785	0.983377	12.1284	371.232	0.966081	17.4839	248.048	0.963243	14.5852	619.489	0.960657	28.5212	513.497	0.965616	15.7023	208.747	0.997568	1.1948	113.482	0.931899	17.9155	185.31	0.979426	8.55581	723.429	0.969139	16.6796	591.717	0.945592	8.71423	140.669	0.968625	7.19925	183.283	0.945827	12.7376	444.985	0.977319	7.33688	410.066
Alg3	0.965139	7.89454	125.709	0.986722	5.99376	194.991	1	0	0	0.949122	26.2258	503.878	0.984247	6.25082	226.571	0.981598	11.8838	1038.97	0.973523	14.1321	362.338	0.97811	10.7532	558.938	0.961085	10.2374	182.754	0.945137	22.8155	335.639	0.98457	8.3398	266.965	0.930634	13.3618	251.65	0.93725	15.1184	296.515	0.942035	12.7376	235.567	0.921845	28.1247	261.96
Alg5	0.883112	31.5782	492.2	0.890277	49.1488	489.232	0.944265	48.5137	1055.81	0.772542	139.871	472.658	0.898205	45.8393	531.121	0.751151	223.416	921.281	0.855677	80.0817	757.801	0.898179	68.1035	795.91	0.758888	92.1366	445.024	0.692058	208.191	623.825	0.804873	147.336	823.615	0.769714	49.9616	217.148	0.721225	84.9511	351.69	0.811587	59.4421	467.543	0.843212	80.7057	539.78
Alg6	0.973854	5.92091	287.018	0.964448	11.9875	474.248	0.991689	6.06421	203.128	0.983041	8.74195	225.785	0.978996	8.33443	849.727	0.981598	11.8838	828.944	0.989685	4.71069	272.851	0.990271	4.77919	205.257	0.990271	2.55935	699.301	0.979426	8.55581	714.016	0.98457	8.3398	642.799	0.970983	4.64759	186.263	0.965487	7.91917	163.563	0.972914	6.36879	88.4394	0.984879	4.89126	153.007
Alg9	0.965139	7.89454	88.8226	0.964448	11.9875	183.034	0.975066	18.1926	1369.43	0.966081	17.4839	1259.1	0.973745	10.418	289.654	0.970557	19.0141	627.103	0.959814	20.413	270.066	0.990271	4.77919	616.213	0.990271	2.55935	70.3779	0.993142	2.85194	176.149	0.979426	11.1197	552.034	0.906311	18.5904	107.357	0.941412	17.9981	207.532	0.919245	16.9834	234.492	0.954639	14.6738	382.194
Alkbh1	0.86334	33.5518	225.245	0.858662	59.9376	539.894	0.93351	48.5137	1327.55	0.932162	34.9678	586.186	0.903902	56.2574	546.282	0.916552	57.0424	727.869	0.932407	40.8259	526.8	0.953789	22.7012	482.367	0.941628	15.3561	285.768	0.954011	22.8155	839.717	0.898887	72.2782	758.577	0.794681	45.314	237.441	0.830876	46.0752	397.525	0.884489	40.3357	387.435	0.895774	41.5757	283.71
Alkbh2	0.947708	11.8418	409.652	0.943116	19.18	309.678	0.983377	12.1284	1089.44	0.983041	8.74195	564.016	0.940004	29.1705	263.708	0.992639	4.75353	457.294	0.976943	12.5618	431.671	0.963517	17.922	818.664	0.92217	20.4748	435.462	0.972568	11.4077	450.428	0.975713	16.6796	1112.68	0.877441	22.657	246.751	0.915841	23.0376	183.758	0.85554	36.0898	243.087	0.939805	25.6791	425.025
Alkbh3	0.932887	17.7627	147.001	0.946671	17.9813	619.496	1	0	0	0.966081	17.4839	543.56	0.989498	4.16721	1017.85	0.985279	9.50706	577.178	0.965616	15.7023	332.718	0.990271	4.77919	539.295	0.970814	7.67805	146.129	1	0	0	0.989713	5.55986	1476.87	0.864871	26.1427	146.933	0.918425	19.438	179.217	0.912486	23.3522	251.728	0.948275	18.3422	519.086
Alkbh4	0.991285	1.97364	1273.89	0.99289	2.3975	74.0106	1	0	0	1	0	0	0.989498	4.16721	155.013	0.992639	4.75353	633.575	0.982808	7.85114	548.581	0.992703	3.58439	939.642	0.970814	7.67805	143.868	0.993142	2.85194	771.605	1	0	0	0.967356	5.22854	103.993	0.968625	7.19925	149.037	0.963885	8.49172	672.513	0.98866	3.66844	386.334
Alkbh5	0.790963	67.1036	305.985	0.83059	92.3039	630.514	0.90688	90.9631	871.08	0.852515	87.4195	402.785	0.796007	166.689	573.212	0.858926	121.215	741.051	0.840401	122.478	609.285	0.880341	74.0774	823.406	0.85299	66.5431	244.809	0.771736	116.929	550.869	0.896717	83.398	567.331	0.737189	74.9424	215.597	0.795155	67.6729	281.28	0.816314	76.4255	286.78	0.894845	41.5757	423.939
Alkbh6	0.921562	17.7627	861.046	0.921785	26.3725	521.944	0.991689	6.06421	2531.65	0.983041	8.74195	593.472	0.947489	20.8361	333.986	0.977918	14.2606	694.175	0.95874	18.8427	539.463	0.971574	15.5324	678.626	0.908124	30.7122	350.086	0.986284	5.70387	196.905	0.974283	13.8997	875.098	0.710432	60.9996	315.427	0.882801	28.797	213.864	0.912486	23.3522	455.182	0.890781	47.6897	470.552
Alkbh7	0.909065	25.6573	266.718	0.93715	22.7763	553.851	0.960755	36.3852	898.931	1	0	0	0.942239	22.9197	565.738	0.977918	14.2606	458.857	0.949518	25.1237	592.056	0.978849	11.948	579.12	0.954062	15.3561	566.421	0.986284	5.70387	854.513	0.989713	5.55986	1412.6	0.872823	22.657	282.494	0.869053	38.156	397.523	0.914734	27.5981	367.468	0.889997	46.4669	399.788
Alkbh8	0.938993	13.8155	181.461	0.99289	2.3975	227.688	1	0	0	1	0	0	0.978996	8.33443	245.054	0.992639	4.75353	667.441	0.996562	1.57023	95.1656	0.995136	2.38959	1817.62	0.970814	7.67805	277.553	0.986284	5.70387	343.438	0.994857	2.77993	1033.06	0.946746	9.29518	94.2854	0.9749	5.7594	143.197	0.963885	8.49172	181.9	0.986628	3.66844	296.988
Alox12	0.947708	11.8418	340.303	0.946889	23.975	365.661	0.91328	78.8347	805.977	0.966081	17.4839	418.363	0.984247	6.25082	627.09	1	0	0	0.996562	1.57023	1858.74	0.973246	13.1428	662.845	0.980543	5.1187	221.886	0.945137	22.8155	497.59	0.979426	11.1197	876.235	0.978237	3.48569	87.7705	0.988282	3.59962	200.517	0.990971	2.12293	76.3942	0.984879	4.89126	147.167
Alpl	0.895482	33.5518	581.732	0.886583	57.5401	299.933	0.911154	72.7705	816.431	0.881284	61.1936	608.938	0.891592	56.2574	394.67	1	0	0	0.994328	7.85114	1173.89	1	0	0	1	0	0	1	0	0	1	0	0	1	0	0	1	0	0	1	0	0	1	0	0
Alppl2	0.991285	1.97364	79.0889	0.989334	3.59626	1533.39	1	0	0	0.886271	69.9356	736.979	0.960778	20.8361	456.438	0.815288	149.736	867.95	0.938146	45.5366	460.354	0.920241	45.4023	740.976	0.883256	30.7122	158.424	0.843289	79.8542	499.131	0.874606	88.9578	716.866	0.925007	12.7809	131.298	0.928861	17.9981	433.235	0.96628	10.6147	300.247	0.977319	7.33688	623.592
Als2	0.947708	11.8418	149.105	0.983212	7.19251	262.267	0.991689	6.06421	1949.32	1	0	0	0.984247	6.25082	937.616	0.988959	7.13029	993.934	0.989685	4.71069	1108.65	0.997568	1.1948	174.307	0.951357	12.7968	102.636	0.96571	14.2597	443.209	0.98457	8.3398	796.888	0.96954	4.64759	90.882	0.98745	2.8797	663.163	0.99235	4.24586	264.026	0.99244	2.44563	359.447
Alyref	0.956424	9.86818	423.343	0.917868	32.3663	465.6	0.983377	12.1284	609.423	1	0	0	0.919203	50.0066	573.476	0.919032	52.2888	459.415	0.878732	67.5198	649.165	0.926821	46.5971	677.766	0.863798	35.8309	255.776	0.968902	19.9636	568.895	0.974283	13.8997	1432.27	0.808913	43.5711	216.001	0.857347	41.7556	174.63	0.914734	29.721	322.18	0.90236	39.13	403.71
Alyref2	0.991285	1.97364	235.793	0.957337	14.385	587.664	1	0	0	0.983041	8.74195	219.443	0.978996	8.33443	879.308	0.985279	9.50706	811.449	0.971595	17.2725	990.171	0.97811	10.7532	1031.01	0.970814	7.67805	111.32	0.979426	8.55581	418.187	0.98457	8.3398	917.971	0.94922	8.71423	298.155	0.96235	8.6391	214.796	0.981942	4.24586	417.775	0.962199	12.2281	476.665
Amacr	0.991285	1.97364	180.799	0.982224	5.99376	399.738	0.983377	12.1284	1418.39	1	0	0	0.989498	4.16721	384.094	0.977918	14.2606	826.947	0.989685	4.71069	971.895	0.980543	9.55838	382.623	1	0	0	0.993142	2.85194	2557.54	0.979426	11.1197	1385.81	0.97461	4.06664	201.127	0.9749	5.7594	272.795	0.975312	4.24586	229.85	0.973539	8.5597	147.187
Ambra1	0.973854	5.92091	249.106	0.975113	8.39126	314.788	0.991689	6.06421	877.193	1	0	0	0.963243	14.5852	254.357	0.974238	16.6374	569.657	0.987159	7.85114	818.436	0.986106	8.36358	471.973	1	0	0	0.986284	5.70387	237.678	0.989713	5.55986	375.495	0.970983	4.64759	97.0031	0.97037	8.6391	172.857	0.972914	6.36879	510.973	0.981099	6.11407	351.863
Amd1	0.861217	41.4464	186.975	0.814827	85.1114	621.353	0.950132	36.3852	868.555	0.949122	26.2258	728.171	0.821352	102.097	615.054	0.855577	111.708	814.413	0.822429	138.18	866.696	0.821594	113.506	798.478	0.741886	120.29	573.663	0.804452	116.929	735.167	0.854105	86.1779	875.378	0.656843	109.799	285.844	0.697641	123.827	354.551	0.736817	114.638	405.263	0.805714	111.276	588.512
Amd2	0.898141	25.6573	144.224	0.869216	56.3413	550.647	0.966755	24.2568	1104.03	0.966081	17.4839	472.678	0.861614	70.8426	526.786	0.900317	73.6797	792.118	0.867444	87.9328	618.939	0.901975	63.3243	694.005	0.825869	58.8651	409.823	0.847674	88.41	674.698	0.910542	55.5986	808.176	0.71361	75.5233	236.631	0.762214	82.0714	316.292	0.779194	82.7943	402.306	0.851863	72.146	547.401
Amdhd1	1	0	0	1	0	0	0.983377	12.1284	744.683	0.966081	17.4839	2135.74	0.945211	27.0869	688.509	0.967994	23.7676	919.715	0.92484	42.3962	573.656	0.995136	2.38959	1757.67	0.990271	2.55935	70.3779	1	0	0	1	0	0	0.973134	4.06664	105.501	0.98745	2.8797	263.443	0.990971	2.12293	90.967	0.973539	8.5597	393.555
Amdhd2	0.956424	9.86818	548.109	0.971558	9.59001	524.912	0.991689	6.06421	526.316	1	0	0	0.973745	10.418	689.692	0.988959	7.13029	732.474	0.986247	6.28091	1606.74	0.97811	10.7532	703.898	0.97321	10.2374	288.364	0.96571	14.2597	894.545	0.990817	8.3398	1314.27	0.932255	12.1999	218.653	0.951679	12.9586	286.873	0.887878	31.844	427.866	0.933175	24.4563	252.95
Amer1	1	0	0	0.989334	3.59626	130.145	0.958444	30.321	943.648	0.983041	8.74195	345.662	0.949103	22.9197	452.883	0.981598	11.8838	1287.43	0.987159	7.85114	257.929	0.97811	10.7532	451.376	0.951357	12.7968	266.622	0.993142	2.85194	255.232	0.979426	11.1197	394.752	0.978237	3.48569	313.583	0.9749	5.7594	201.178	0.936798	14.8605	719.131	0.964502	11.0053	896.75
Amfr	0.845833	47.3673	354.745	0.882518	57.5401	459.099	0.950132	36.3852	687.376	0.898243	52.4517	440.061	0.86891	72.9262	338.587	0.86742	106.954	782.847	0.865913	75.371	553.62	0.87495	75.2722	652.417	0.898491	33.2716	286.359	0.801186	128.337	476.555	0.845075	125.097	705.695	0.693064	101.085	237.075	0.773062	72.7124	284.629	0.739131	84.9172	323.176	0.858034	61.1407	318.427
Amica1	1	0	0	0.982224	5.99376	664.372	0.983377	12.1284	362.335	1	0	0	0.989498	4.16721	542.889	0.99632	2.37676	1310.62	0.989685	4.71069	741.849	0.981271	10.7532	750.637	0.951357	12.7968	91.8288	0.993142	2.85194	512.295	0.989713	5.55986	191.578	0.985491	2.32379	160.224	0.993725	1.43985	138.233	0.963885	8.49172	362.522	0.99622	1.22281	85.3606
Amigo1	1	0	0	1	0	0	1	0	0	1	0	0	0.984247	6.25082	815.817	1	0	0	0.993123	3.14046	80.6362	0.985407	7.16878	613.246	0.990271	2.55935	97.7804	0.979426	8.55581	1025.51	0.989713	5.55986	1290.26	0.957608	7.55233	154.868	0.9498	11.5188	345.522	0.924179	16.9834	139.779	0.981099	6.11407	521.262
Amigo2	0.967451	9.86818	217.035	0.934623	25.1738	446.83	0.991689	6.06421	444.642	0.983041	8.74195	219.443	0.970002	14.5852	597.027	0.988959	7.13029	350.317	0.97937	9.42137	800.667	0.978849	11.948	636.944	0.951357	12.7968	382.049	0.972568	11.4077	576.81	1	0	0	0.992746	1.1619	90.3574	0.978037	5.03947	89.2141	0.990971	2.12293	82.0614	1	0	0
Amigo3	1	0	0	0.982224	5.99376	421.554	0.991689	6.06421	234.412	0.983041	8.74195	230.362	0.96594	18.7525	240.879	0.955836	28.5212	665.539	0.975931	10.9916	110.572	0.96738	19.1168	389.894	0.963667	12.7968	103.927	0.986284	5.70387	818.122	0.963996	19.4595	1121.67	0.981864	2.90474	92.0213	0.992025	4.31955	605.008	0.981942	4.24586	288.924	0.99622	1.22281	74.8335
Ammecr1l	0.915524	21.71	185.415	0.944252	20.3788	506.273	0.966755	24.2568	1494.45	0.983041	8.74195	852.515	0.933389	29.1705	478.141	0.948475	33.2747	514.115	0.976943	12.5618	447.398	0.974	14.3376	689.321	0.931899	17.9155	344.393	0.942013	31.3713	574.454	0.963996	19.4595	484.5	0.88011	24.9808	134.739	0.914136	21.5977	246.757	0.898842	31.844	534.576	0.950858	15.8966	259.522
Amn1	0.965139	7.89454	284.253	0.968003	10.7888	696.957	0.983377	12.1284	486.21	0.983041	8.74195	583.431	0.984247	6.25082	557.776	0.923908	52.2888	803.064	0.946085	26.6939	817.804	0.973246	13.1428	494.993	0.954062	15.3561	152.992	0.954011	22.8155	550.607	0.963996	19.4595	703.281	0.906311	18.0094	199.803	0.884583	33.8365	254.793	0.906233	21.2293	405.994	0.887325	44.0213	294.517
Amot	0.673812	185.522	625.477	0.764094	152.241	488.876	0.965238	66.7063	1148.6	0.983041	8.74195	503.778	0.994749	2.08361	231.374	0.992639	4.75353	552.863	0.987159	7.85114	878.756	0.930526	57.3503	398.179	0.91774	28.1529	131.379	0.853077	82.7061	465.045	0.937303	44.4789	384.136	0.87949	27.8855	159.28	0.917457	35.2763	324.988	0.910552	19.1064	237.258	0.938019	24.4563	558.866
Amotl1	0.932887	17.7627	172.226	0.948782	20.3788	259.237	0.975066	18.1926	923.686	0.949122	26.2258	298.783	0.959564	18.7525	524.328	0.904937	73.6797	724.814	0.941854	34.545	440.263	0.956467	27.4803	483.036	0.980543	5.1187	206.476	0.979426	8.55581	677.774	0.989713	5.55986	524.756	0.954671	12.1999	210.951	0.969589	7.91917	211.033	0.945827	12.7376	193.932	0.98866	3.66844	849.592
Amotl2	0.956424	9.86818	117.032	0.968003	10.7888	260.029	1	0	0	1	0	0	0.952377	29.1705	335.136	0.929617	54.6656	711.749	0.945247	32.9748	499.035	0.950741	34.6491	430.443	0.970814	7.67805	284.356	0.970461	25.6674	387.595	0.975713	16.6796	708.541	0.985491	2.32379	197.744	0.9749	5.7594	138.476	0.990971	2.12293	83.8785	0.99622	1.22281	127.828
Ampd2	0.934903	19.7364	183.913	0.957337	14.385	558.025	0.975066	18.1926	310.129	1	0	0	0.986239	10.418	255.007	0.988959	7.13029	312.641	0.996562	1.57023	279.877	1	0	0	1	0	0	0.986284	5.70387	827.871	1	0	0	0.985491	2.32379	141.794	0.98745	2.8797	611.313	0.981942	4.24586	260.46	1	0	0
Amt	0.930278	15.7891	658.617	0.93285	28.77	538.883	0.941821	42.4495	855.019	0.949122	26.2258	651.32	0.895623	52.0902	648.181	0.939654	45.1585	786.717	0.908063	59.6687	576	0.94642	38.2335	553.147	0.724281	107.493	610.641	0.94719	25.6674	473.68	0.937303	44.4789	701.522	0.776749	94.1137	372.565	0.792792	86.391	445.421	0.846266	61.565	548.837	0.885496	55.0266	590.832
Amz2	0.976	7.89454	163.554	0.969082	11.9875	290.509	1	0	0	0.983041	8.74195	789.889	0.957992	16.6689	684.09	0.985279	9.50706	1168.74	0.966673	17.2725	290.29	0.984224	10.7532	691.176	0.970814	7.67805	323.598	0.972568	11.4077	287.103	0.98457	8.3398	674.384	0.877323	25.5617	247.632	0.908697	27.3571	302.406	0.936798	14.8605	148.119	0.930487	25.6791	364.397
Anapc1	0.921562	17.7627	132.211	0.953782	15.5838	698.395	1	0	0	0.966081	17.4839	552.009	0.968494	12.5016	147.591	0.927585	49.9121	664.371	0.959814	20.413	393.746	0.957698	23.8959	478.55	0.965263	15.3561	114.459	0.926689	34.2232	275.754	0.969139	16.6796	295.935	0.917758	14.5237	127.176	0.951221	16.5583	151.859	0.957367	12.7376	134.044	0.965979	11.0053	169.255
Anapc10	0.956424	9.86818	193.275	0.951352	17.9813	471.826	0.983377	12.1284	1997.15	0.966081	17.4839	808.045	0.952741	18.7525	389.546	0.996882	4.75353	989.12	0.949518	25.1237	536.318	0.968382	15.5324	651.37	0.963667	12.7968	290.214	0.993142	2.85194	106.701	0.989713	5.55986	1251.12	0.906883	15.6856	245.293	0.893986	28.797	252.041	0.918741	19.1064	489.991	0.916837	26.9019	533.108
Anapc11	0.852617	43.42	215.386	0.891669	51.5463	374.737	0.944265	48.5137	700.308	0.983041	8.74195	1035.2	0.908109	52.0902	758.356	0.952155	30.8979	873.739	0.899942	59.6687	312.072	0.904289	50.1815	661.043	0.774365	81.8992	561.441	0.945137	22.8155	236.893	0.927992	38.9191	975.488	0.567778	142.913	360.76	0.696266	114.468	349.282	0.736817	114.638	407.404	0.776795	121.059	601.667
Anapc13	0.769223	260.52	529.071	0.79935	293.694	761.289	0.980033	78.8347	983.319	0.956894	52.4517	2123.08	0.755857	443.808	1031.64	0.890468	209.155	1526.56	0.755861	577.844	1895.55	0.645984	976.149	2348.69	0.342477	1128.67	1567.22	0.843899	239.563	1600.03	0.828988	350.271	1709.28	0.439776	589.663	992.05	0.597566	505.387	1022.05	0.56408	547.716	1061.48	0.695326	511.136	1220.08
Anapc15	0.956424	9.86818	102.394	0.970629	14.385	671.726	0.991689	6.06421	173.913	1	0	0	0.954335	20.8361	502.049	0.981598	11.8838	995.587	0.982808	7.85114	316.429	0.982975	8.36358	790.414	0.93476	20.4748	646.614	0.986284	5.70387	1462.34	0.974283	13.8997	1195.85	0.694836	69.1329	228.1	0.819921	58.3139	292.161	0.854216	44.5815	429.571	0.897454	45.2441	355.18
Anapc16	0.92096	27.6309	345.661	0.883412	45.5526	470.013	0.975066	18.1926	800.989	0.983041	8.74195	508.13	0.878692	56.2574	630.368	0.926393	47.5353	876.155	0.897953	64.3794	578.666	0.927035	35.8439	665.61	0.840482	48.6277	311.84	0.955517	25.6674	325.502	0.947432	38.9191	1046.04	0.570839	141.751	386.566	0.687562	137.506	348.828	0.727132	114.638	348.134	0.747784	122.281	540.335
Anapc2	0.886701	25.6573	223.293	0.919389	28.77	471.335	0.991689	6.06421	765.111	0.983041	8.74195	564.016	0.931736	27.0869	386.071	0.94502	47.5353	904.243	0.92484	42.3962	709.138	0.954574	23.8959	460.252	0.963667	12.7968	409.679	0.958852	17.1116	362.519	0.98457	8.3398	803.63	0.897237	20.9141	134.69	0.899381	25.9173	269.506	0.909712	21.2293	174.8	0.938964	24.4563	303.324
Anapc4	0.895417	23.6836	309.971	0.922285	32.3663	379.746	0.93351	48.5137	1012.04	1	0	0	0.915983	33.3377	710.974	0.920385	66.5494	659.218	0.93766	34.545	516.427	0.955275	25.0907	615.422	0.938533	25.5935	432.508	0.935235	34.2232	742.755	0.955271	27.7993	672.506	0.868134	22.657	309.556	0.877468	30.9568	380.542	0.878907	33.9669	252.327	0.928602	29.3475	360.073
Anapc5	0.883112	31.5782	318.17	0.879871	46.7513	520.941	0.93351	48.5137	480.678	0.936662	43.7097	865.202	0.903902	56.2574	431.669	0.786518	197.271	860.423	0.847979	81.6519	744.95	0.893659	78.8566	668.953	0.816248	61.4244	301.041	0.760801	165.412	698.448	0.863284	91.7378	656.822	0.77537	59.2567	231.105	0.800729	66.2331	251.048	0.840288	55.1962	267.832	0.83099	68.4776	562.426
Anapc7	0.898141	25.6573	359.662	0.886951	44.3538	460.061	0.983377	12.1284	1371.97	0.983041	8.74195	503.778	0.947489	20.8361	727.068	0.965243	28.5212	712.532	0.953885	25.1237	319.87	0.964291	19.1168	864.25	0.931899	17.9155	266.847	0.955517	25.6674	344.482	0.955271	27.7993	756.097	0.837828	31.9522	184.801	0.870642	35.2763	437.748	0.887878	33.9669	257.518	0.905631	44.0213	278.161
Ang	0.973854	5.92091	317.539	0.989334	3.59626	135.415	0.983377	12.1284	320.643	1	0	0	0.994749	2.08361	328.839	0.99632	2.37676	930.233	0.996562	1.57023	78.6844	0.997568	1.1948	374.813	0.980543	5.1187	315.757	1	0	0	0.989713	5.55986	916.409	0.947746	9.87612	160.025	0.966392	12.9586	349.993	0.963885	10.6147	251.058	0.984879	4.89126	107.5
Angel2	0.952001	15.7891	140.989	0.934623	25.1738	372.332	0.975066	18.1926	397.026	1	0	0	0.922905	33.3377	581.334	0.935989	47.5353	674.213	0.953885	25.1237	568.417	0.961085	19.1168	345.804	0.961085	10.2374	684.276	0.935235	34.2232	451.49	0.919348	47.2588	737.62	0.87949	27.3046	163.75	0.899381	25.9173	317.105	0.885467	29.721	228.003	0.945543	22.0106	187.717
Angptl6	1	0	0	0.982224	5.99376	200.973	1	0	0	1	0	0	1	0	0	0.99632	2.37676	1248.44	0.989685	4.71069	1037.05	0.992703	3.58439	496.982	0.983515	10.2374	165.111	0.972568	11.4077	215.694	0.974283	13.8997	266.113	0.960101	6.39043	99.8847	0.984312	3.59962	187.26	0.99235	4.24586	373.204	0.984879	4.89126	780.265
Ank	1	0	0	0.996445	1.19875	563.698	0.991689	6.06421	264.831	0.949122	26.2258	616.827	0.907172	39.5885	510.444	0.903786	83.1868	649.334	0.928911	34.545	519.923	0.924603	37.0387	420.001	0.961085	10.2374	417.807	0.867055	62.7426	437.73	0.975713	16.6796	407.054	0.980023	4.64759	116.324	0.975839	6.47932	814.774	0.99235	4.24586	152.788	1	0	0
Ank3	0.848418	39.4727	300.305	0.869246	50.3476	576.783	0.975066	18.1926	1148.16	0.966081	17.4839	504.906	0.91059	58.341	468.823	0.888518	104.578	845.207	0.908064	59.6687	657.321	0.93294	40.6231	486.795	0.915396	25.5935	198.389	0.899313	45.631	480.847	0.963996	19.4595	765.163	0.809599	40.6664	203.087	0.850605	51.1147	346.29	0.856225	44.5815	211.45	0.903268	40.3529	333.58
Ankfy1	0.973854	5.92091	97.0965	0.950227	16.7825	359.829	0.983377	12.1284	838.791	0.983041	8.74195	252.08	0.963243	14.5852	233.66	0.97532	19.0141	550.776	0.959814	20.413	185.922	0.96012	22.7012	344.726	0.963667	12.7968	106.786	0.958852	17.1116	296.216	0.979426	11.1197	283.286	0.860343	26.1427	126.674	0.905639	24.4774	190.656	0.903483	27.5981	184.386	0.948275	18.3422	462.008
Ankhd1	0.880745	29.6045	286.135	0.871927	53.9438	385.851	0.96896	30.321	1323.97	0.881284	61.1936	574.817	0.906013	47.923	553.491	0.941114	38.0282	615.23	0.948425	23.5534	491.863	0.913457	56.1555	691.512	0.881411	40.9496	323.444	0.865063	59.8907	487.916	0.923164	55.5986	633.235	0.793233	44.1521	158.382	0.794009	66.2331	363.465	0.812757	74.3026	280.887	0.902622	46.4669	270.635
Ankib1	0.950212	13.8155	246.112	0.957337	14.385	484.512	0.991689	6.06421	2544.53	0.985631	17.4839	369.14	0.994749	2.08361	141.583	0.970557	19.0141	833.831	0.954693	26.6939	375.697	0.982975	8.36358	227.576	0.951357	12.7968	323.449	0.979426	8.55581	309.009	0.990817	8.3398	614.146	0.942961	12.7809	245.712	0.944535	13.6786	175.895	0.930473	19.1064	154.381	0.984879	4.89126	566.511
Ankle2	0.950212	13.8155	331.244	0.938955	32.3663	337.084	0.975066	18.1926	279.163	1	0	0	0.968494	12.5016	119.555	0.941114	38.0282	585.246	0.947045	28.2641	450.852	0.980543	9.55838	372.306	0.982632	7.67805	190.784	0.96571	14.2597	504.676	0.945017	33.3592	772.495	0.934236	12.7809	125.024	0.932921	17.2782	243.579	0.959622	8.49172	448.546	0.95582	15.8966	263.941
Ankmy2	0.956424	9.86818	180.958	0.957337	14.385	428.122	0.991689	6.06421	935.454	0.966081	17.4839	477.661	0.973745	10.418	192.941	0.977918	14.2606	1304.92	0.989685	4.71069	196.76	0.97811	10.7532	1184.82	0.970814	7.67805	328.156	0.993142	2.85194	771.605	1	0	0	0.915215	15.1047	197.546	0.93725	15.1184	214.476	0.924179	16.9834	198.973	0.965979	12.2281	201.02
Ankra2	0.952001	15.7891	134.153	0.909023	38.3601	329.775	0.975066	18.1926	857.809	0.983041	8.74195	184.57	0.952741	18.7525	500.149	0.978975	16.6374	865.655	0.956383	21.9832	530.037	0.961085	19.1168	448.403	0.970814	7.67805	137.874	0.986284	5.70387	805.389	0.974283	13.8997	474.351	0.827031	34.276	210.303	0.91502	22.3177	352.437	0.840389	42.4586	246.253	0.909868	35.4616	356.869
Ankrd10	0.906834	23.6836	278.226	0.8743	45.5526	502.36	0.991689	6.06421	203.128	0.983041	8.74195	187.196	0.925615	37.5049	335.719	0.952155	30.8979	477.085	0.934671	29.8343	383.316	0.980543	9.55838	543.052	0.961085	10.2374	249.055	0.979426	8.55581	635.269	0.974283	13.8997	1050.62	0.956474	6.97138	144.018	0.968625	7.19925	529.652	0.932561	21.2293	137.972	0.975481	12.2281	134.974
Ankrd11	0.681937	142.102	374.025	0.698941	221.769	860.175	0.871997	109.156	1273.47	0.843308	113.645	622.702	0.777825	181.274	670.6	0.826375	156.866	798.383	0.811198	185.287	672.514	0.830668	162.492	973.064	0.841384	89.5773	277.717	0.758883	159.708	616.216	0.860836	119.537	935.511	0.75135	73.7805	224.396	0.722073	95.75	426.901	0.799095	84.9172	195.015	0.923952	29.3475	475.272
Ankrd12	0.817323	106.576	473.595	0.722755	175.018	832.483	0.90688	90.9631	837.478	0.915203	43.7097	588.135	0.898205	45.8393	835.605	0.875524	104.578	733.42	0.914163	54.958	424.504	0.88773	86.0254	777.989	0.876588	35.8309	415.233	0.900051	62.7426	493.602	0.920785	50.0388	1160.65	0.802294	58.6758	205.874	0.814106	75.5921	447.406	0.799095	84.9172	485.363	0.895906	48.9126	391.712
Ankrd13a	0.973854	5.92091	176.603	0.938165	23.975	528.92	0.991689	6.06421	188.786	0.949122	26.2258	1094.52	0.963243	14.5852	607.202	0.930073	45.1585	729.304	0.943622	29.8343	227.642	0.952144	25.0907	466.703	0.951357	12.7968	294.078	0.972568	11.4077	301.119	0.950146	30.5793	748.826	0.779832	59.2567	197.965	0.854953	43.1955	236.335	0.831369	44.5815	366.28	0.922951	28.1247	433.271
Ankrd13c	0.845833	47.3673	323.108	0.916897	31.1675	497.96	0.975066	18.1926	418.345	0.949122	26.2258	327.886	0.919128	37.5049	518.675	0.911671	57.0424	503.01	0.901787	54.958	575.641	0.920868	46.5971	554.288	0.898491	33.2716	340.681	0.931421	28.5194	445.475	0.953709	25.0194	753.234	0.8011	43.5711	280.631	0.891682	30.2368	205.6	0.898842	33.9669	245.665	0.931463	26.9019	423.41
Ankrd13d	0.991285	1.97364	147.754	0.978669	7.19251	221.297	1	0	0	0.983041	8.74195	503.778	0.98554	8.33443	438.953	0.992639	4.75353	635.599	0.982808	7.85114	102.597	1	0	0	1	0	0	0.979426	8.55581	1256.44	1	0	0	0.985491	2.32379	90.3102	0.984312	3.59962	95.3351	0.957367	12.7376	231.238	0.974651	9.78251	325.563
Ankrd16	0.947708	11.8418	214.385	0.931079	26.3725	396.759	1	0	0	1	0	0	0.947489	20.8361	173.116	0.960657	28.5212	620.039	0.983764	9.42137	689.932	0.973246	13.1428	194.924	0.970814	7.67805	108.51	1	0	0	1	0	0	0.917115	16.2666	158.373	0.907871	23.0376	229.713	0.954856	10.6147	242.809	0.954639	14.6738	205.103
Ankrd17	0.802399	69.0773	440.229	0.829001	88.7076	484.7	0.902863	78.8347	1133.34	0.869402	78.6775	499.375	0.833836	89.5951	462.672	0.862921	135.476	698.447	0.90415	70.6603	385.023	0.918396	71.6878	424.968	0.864239	48.6277	251.417	0.865063	59.8907	369.789	0.925038	61.1585	600.691	0.79148	50.5425	164.713	0.840826	48.235	258.75	0.847449	63.6879	280.537	0.955314	22.0106	311.797
Ankrd22	0.947708	11.8418	482.255	0.985779	4.79501	324.688	0.991689	6.06421	364.431	1	0	0	0.989498	4.16721	2283.21	0.99632	2.37676	423.908	0.994174	6.28091	195.509	0.974	14.3376	591.959	0.947894	23.0342	221.852	0.960822	19.9636	310.751	0.927992	38.9191	439.023	0.766778	58.6758	197.661	0.837035	47.515	267.518	0.795283	55.1962	346.023	0.900379	42.7985	314.979
Ankrd24	1	0	0	0.985779	4.79501	487.052	0.992958	12.1284	347.826	0.983041	8.74195	187.196	0.978996	8.33443	215.451	0.977918	14.2606	909.368	0.978276	15.7023	834.409	0.982975	8.36358	683.383	0.980543	5.1187	104.249	1	0	0	0.989713	5.55986	299.335	0.922452	13.9428	204.043	0.955555	12.9586	245.667	0.954856	10.6147	438.409	0.958418	13.451	274.84
Ankrd26	0.991285	1.97364	147.754	0.972623	10.7888	591.706	0.991689	6.06421	478.469	1	0	0	0.978996	8.33443	458.839	0.981598	11.8838	492.336	0.986247	6.28091	342.042	0.98369	9.55838	460.697	0.990271	2.55935	124.719	0.986284	5.70387	1017.45	0.994857	2.77993	190.84	0.967356	5.22854	511.423	0.96235	8.6391	229.751	0.948421	14.8605	155.562	0.981099	6.11407	104.903
Ankrd27	0.982569	3.94727	243.274	0.961995	14.385	478.658	0.983377	12.1284	1482.36	1	0	0	0.984247	6.25082	358.646	0.99632	2.37676	537.057	0.989685	4.71069	1062.1	0.990271	4.77919	262.857	0.970814	7.67805	518.081	1	0	0	0.989713	5.55986	161.592	0.958558	8.13328	130.698	0.988797	4.31955	192.66	0.963885	8.49172	501.075	0.984879	4.89126	118.766
Ankrd28	0.956424	9.86818	355.666	0.936006	21.5775	341.255	0.985162	18.1926	311.313	0.985631	17.4839	374.392	0.924352	35.4213	266.08	0.92023	54.6656	726.215	0.947889	29.8343	496.321	0.970814	14.3376	339.695	0.990271	2.55935	155.352	0.923164	42.779	332.358	0.946333	36.1391	944.306	0.937836	12.1999	202.791	0.941401	14.3985	217.442	0.963885	8.49172	125.648	0.973539	8.5597	172.442
Ankrd29	0.956424	9.86818	104.131	0.978669	7.19251	204.223	0.991689	6.06421	2544.53	1	0	0	0.945211	27.0869	308	0.981598	11.8838	619.562	0.943622	29.8343	715.631	0.978849	11.948	350.104	1	0	0	1	0	0	1	0	0	1	0	0	1	0	0	1	0	0	1	0	0
Ankrd32	1	0	0	0.982224	5.99376	522.684	0.975066	18.1926	325.991	1	0	0	0.989498	4.16721	174.461	0.964327	26.1444	461.512	0.975931	10.9916	157	0.992703	3.58439	1300.44	0.961085	10.2374	379.981	0.979426	8.55581	671.785	0.990817	8.3398	476.007	0.939502	10.4571	281.276	0.952937	10.7989	153.628	0.945827	12.7376	249.148	0.975481	11.0053	124.319
Ankrd37	0.973854	5.92091	452.823	0.98042	9.59001	1197.37	0.983377	12.1284	831.471	1	0	0	0.963243	14.5852	1034.14	0.988959	7.13029	1683.56	0.947045	28.2641	579.593	0.975678	11.948	286.924	0.992091	7.67805	238.039	0.986284	5.70387	624.117	1	0	0	0.983779	2.32379	419.928	0.98745	2.8797	561.312	0.981942	4.24586	453.112	1	0	0
Ankrd39	0.967451	9.86818	116.342	0.961995	14.385	267.634	1	0	0	1	0	0	0.994749	2.08361	645.578	0.977918	14.2606	821.674	0.975931	10.9916	317.536	0.978849	11.948	536.607	0.970814	7.67805	189.102	0.979426	8.55581	540.952	0.994857	2.77993	113.469	0.917758	13.9428	180.462	0.956075	10.0789	198.869	0.930473	19.1064	157.818	0.970891	11.0053	322.752
Ankrd40	0.926309	21.71	284.212	0.946671	17.9813	223.748	0.975066	18.1926	310.616	1	0	0	0.970002	14.5852	233.755	0.988959	7.13029	737.465	0.959814	20.413	248.643	0.972211	16.7272	362.712	0.970814	7.67805	83.5172	0.96571	14.2597	324.701	0.958852	22.2395	210.734	0.873828	23.2379	191.416	0.919713	23.0376	154.392	0.918741	21.2293	111.044	0.947078	18.3422	481.286
Ankrd46	0.967451	9.86818	122.768	0.957337	14.385	438.813	0.991689	6.06421	903.342	1	0	0	0.984247	6.25082	235.473	0.97532	19.0141	742.437	0.982808	7.85114	722.413	0.990271	4.77919	280.033	0.980543	5.1187	345.671	0.979426	8.55581	655.22	0.989713	5.55986	1384.36	0.910508	15.1047	163.004	0.939178	15.8383	315.628	0.924179	16.9834	552.847	0.964502	11.0053	162.772
Ankrd49	0.956424	9.86818	354.427	0.964448	11.9875	374.063	1	0	0	1	0	0	0.968494	12.5016	440.311	0.992639	4.75353	314.72	0.986247	6.28091	1115.49	0.97811	10.7532	460.894	0.941628	15.3561	753.644	0.993142	2.85194	202.922	0.994857	2.77993	1620.75	0.9333	12.1999	109.249	0.951221	16.5583	227.166	0.972914	6.36879	312.248	0.98866	3.66844	182.955
Ankrd50	1	0	0	0.989334	3.59626	125.53	1	0	0	1	0	0	0.994749	2.08361	388.35	0.985279	9.50706	756.578	1	0	0	0.990271	4.77919	288.745	0.990271	2.55935	277.624	0.96571	14.2597	232.45	0.985836	11.1197	263.533	0.973134	4.06664	101.392	0.981175	4.31955	300.863	0.968061	6.36879	82.2044	0.98866	3.66844	214.685
Ankrd54	0.912847	19.7364	591.739	0.89492	43.1551	395.46	0.983377	12.1284	568.722	0.983041	8.74195	1048.22	0.917661	35.4213	667.389	0.907649	68.9262	647.924	0.930828	37.6855	545.264	0.927504	41.8179	711.278	0.908124	30.7122	368.834	0.94719	25.6674	288.003	0.945017	33.3592	449.224	0.845855	31.9522	161.267	0.869826	34.5564	193.047	0.894477	29.721	364.748	0.920194	31.7932	335.732
Ankrd61	0.973854	5.92091	158.621	0.985779	4.79501	339.928	0.983377	12.1284	1400.69	1	0	0	0.989498	4.16721	148.716	0.953314	33.2747	791.272	0.972493	12.5618	583.309	0.990271	4.77919	392.272	0.990271	2.55935	88.9284	0.986284	5.70387	1152.58	0.98457	8.3398	1719.02	0.97461	4.06664	88.5578	0.970536	6.47932	202.469	0.990971	2.12293	132.013	0.99622	1.22281	222.42
Ankrd9	0.982569	3.94727	167.823	0.97969	8.39126	434.566	1	0	0	0.966081	17.4839	709.428	0.968494	12.5016	849.539	0.880905	83.1868	858.524	0.930362	45.5366	797.55	0.937762	38.2335	852.073	0.910114	33.2716	273.013	0.928444	37.0752	385.471	0.927139	50.0388	1072.65	0.946746	9.29518	322.603	0.9548	12.2387	355.898	0.96628	10.6147	551.645	0.981099	6.11407	166.525
Anks1	0.973854	5.92091	114.131	0.951352	17.9813	526.259	0.983377	12.1284	1648.2	1	0	0	0.984247	6.25082	101.289	0.977918	14.2606	701.992	0.972493	12.5618	592.416	0.97811	10.7532	410.386	0.970814	7.67805	126.968	0.972568	11.4077	278.415	0.985836	11.1197	1072.98	0.967356	5.22854	98.5383	0.978037	5.03947	380.743	0.975137	8.49172	187.964	0.99244	2.44563	73.6669
Anks1b	1	0	0	0.996445	1.19875	261.233	0.991689	6.06421	485.437	0.898243	52.4517	1380.99	0.813776	112.515	756.514	1	0	0	0.996562	1.57023	1201.92	1	0	0	1	0	0	1	0	0	1	0	0	0.996373	0.580948	84.6955	0.996862	0.719925	153.398	1	0	0	1	0	0
Anks3	0.930278	15.7891	398.23	0.946671	17.9813	727.886	0.966755	24.2568	442.978	1	0	0	0.947489	20.8361	586.215	0.960657	28.5212	541.397	0.942651	28.2641	423.296	0.961753	26.2855	443.655	0.963667	12.7968	143.681	0.958852	17.1116	251.848	0.974283	13.8997	691.296	0.910774	18.0094	127.46	0.931416	19.438	299.062	0.905794	29.721	892.104	0.947078	17.1194	486.548
Ankzf1	0.950212	13.8155	310.201	0.949637	21.5775	290.215	0.983377	12.1284	800.935	0.983041	8.74195	1035.2	0.963243	14.5852	401.518	0.970557	19.0141	802.966	0.962178	17.2725	270.947	0.977031	14.3376	1301.99	0.980543	5.1187	94.3587	0.979426	8.55581	201.216	0.989713	5.55986	1620.75	0.952847	7.55233	93.8627	0.946228	15.1184	141.347	0.957367	12.7376	394.474	0.965979	11.0053	712.96
Ano1	0.912847	19.7364	349.839	0.910556	40.7576	483.679	0.902863	78.8347	955.428	0.966081	17.4839	489.759	0.975205	12.5016	839.56	1	0	0	0.990532	6.28091	910.979	0.90389	87.2202	621.909	0.812373	92.1366	370.63	0.773942	159.708	508.027	0.817592	150.116	735.749	0.796714	51.1235	148.077	0.800728	66.2331	301.058	0.847315	48.8274	298.374	0.932341	29.3475	282.61
Ano10	0.950212	13.8155	251.004	0.914674	28.77	409.543	0.975066	18.1926	298.239	0.983041	8.74195	286.205	0.946332	29.1705	469.607	0.948475	33.2747	691.301	0.975931	10.9916	363.93	0.971574	15.5324	449.689	0.970814	7.67805	91.22	0.913005	39.9271	290.787	0.953709	25.0194	440.904	0.939502	10.4571	270.59	0.938266	15.1184	275.114	0.948421	14.8605	242.394	0.941782	22.0106	198.278
Ano6	0.912847	19.7364	647.076	0.936006	21.5775	525.77	0.991689	6.06421	686.813	1	0	0	0.973745	10.418	463.474	0.988959	7.13029	588.387	0.949518	25.1237	391.207	0.97811	10.7532	641.75	0.951357	12.7968	333.612	0.972568	11.4077	385.219	0.98457	8.3398	221.405	0.996373	0.580948	76.7224	0.996862	0.719925	287.356	0.972914	6.36879	691.022	0.99622	1.22281	93.5716
Anp32a	0.824668	47.3673	186.968	0.858662	59.9376	621.206	0.929725	66.7063	1237.48	0.966081	17.4839	791.296	0.873465	58.341	470.48	0.94229	40.405	1350.34	0.901326	62.8091	658.197	0.943104	37.0387	944.098	0.877067	51.187	228.199	0.974388	14.2597	760.998	0.953709	25.0194	441.723	0.637842	98.7612	329.688	0.710707	116.628	408.678	0.718503	116.761	350.845	0.754975	128.395	843.381
Anp32b	0.789496	98.6818	497.156	0.735212	155.838	718.738	0.857559	127.348	1099.8	0.915203	43.7097	629.002	0.727438	179.19	763.582	0.84046	109.331	957.345	0.803395	179.006	1110.58	0.792043	155.324	1023.57	0.707455	163.798	612.945	0.822861	88.41	498.426	0.836736	136.217	1000.94	0.549824	248.646	553.367	0.63447	217.417	606.185	0.629296	244.137	643.06	0.743314	193.205	772.524
Anp32e	0.912496	29.6045	477.192	0.86755	53.9438	384.08	0.962312	42.4495	424.565	1	0	0	0.919128	37.5049	405.135	0.958765	35.6515	677.004	0.940198	31.4046	1054.3	0.929223	45.4023	928.893	0.837467	58.8651	437.572	0.993142	2.85194	222.222	0.933135	36.1391	691.209	0.719923	77.8471	241.195	0.724603	94.3101	352.077	0.710456	101.901	407.176	0.820006	86.8198	574.958
Anxa1	0.716904	250.652	758.878	0.794547	166.627	984.211	0.886273	90.9631	780.209	0.903114	61.1936	396.78	0.723591	254.2	993.846	0.906627	66.5494	919.068	0.851025	142.891	1112.7	0.793616	151.739	871.167	0.598198	222.664	712.964	0.861105	82.7061	974.601	0.845181	147.336	1135.21	0.614733	155.694	416.79	0.61579	183.581	494.549	0.625514	144.359	384.907	0.70384	211.547	763.297
Anxa13	1	0	0	1	0	0	0.991689	6.06421	268.673	1	0	0	0.989498	4.16721	2360.4	0.947865	42.7818	878.716	0.897953	64.3794	947.946	0.882404	78.8566	736.213	0.772389	120.29	395.673	0.904299	54.1868	631.812	0.847347	113.977	1050.34	0.359571	569.91	874.096	0.487922	501.068	838.881	0.434893	554.085	914.098	0.426553	644.423	1130.24
Anxa2	0.66786	290.125	603.512	0.735245	298.489	898.458	0.929725	66.7063	1644.05	1	0	0	0.760791	275.036	1038.55	0.811995	316.11	1263.98	0.774767	351.731	1189.46	0.763743	301.089	1473.31	0.607497	342.953	760.154	0.791434	171.116	768.994	0.754992	266.873	994.392	0.619664	194.618	638.869	0.585962	247.654	745.908	0.594235	284.473	617.142	0.689107	237.226	761.249
Anxa3	0.982569	3.94727	76.2052	0.93715	22.7763	347.282	0.983377	12.1284	638.044	0.903114	61.1936	488.286	0.839585	77.0935	542.402	0.955836	28.5212	709.701	0.923059	39.2557	790.378	0.990271	4.77919	798.677	0.990271	2.55935	663.57	0.993142	2.85194	153.752	0.989713	5.55986	1298.22	0.989118	1.74285	458.135	0.996862	0.719925	312.793	0.990971	2.12293	94.5358	0.99622	1.22281	1893.94
Anxa4	0.921562	17.7627	513.292	0.931079	26.3725	568.529	0.950132	36.3852	1507.04	0.932162	34.9678	435.502	0.894979	41.6721	555.599	0.866174	116.461	1014.69	0.797837	144.461	802.979	0.935352	39.4283	519.999	0.851715	63.9838	267.482	0.951994	19.9636	774.73	0.922048	52.8187	756.195	0.543616	160.342	349.048	0.61509	172.782	488.904	0.547469	180.449	484.675	0.665365	215.215	637.028
Anxa5	0.784004	71.0509	311.753	0.804181	104.291	509.507	0.975066	18.1926	296.832	0.955557	43.7097	1907.61	0.739886	137.518	649.613	0.887156	99.8241	1011.8	0.830023	125.618	559.777	0.848837	95.5838	651.243	0.680964	97.2554	372.981	0.914297	59.8907	680.494	0.933276	50.0388	804.914	0.627894	101.085	265.325	0.68072	118.068	415.537	0.688486	133.745	407.02	0.699126	173.64	723.256
Anxa6	0.965139	7.89454	247.667	0.946118	22.7763	204.702	0.97122	42.4495	1226.88	0.949122	26.2258	439.776	0.93282	39.5885	367.28	0.932322	49.9121	689.183	0.922223	45.5366	708.694	0.926154	39.4283	596.076	0.871805	43.509	240.492	0.859819	79.8542	555.586	0.906745	61.1585	812.597	0.741417	51.7044	206.623	0.752271	93.5902	367.22	0.758216	97.6548	326.193	0.797378	101.494	406.786
Anxa7	0.919477	25.6573	253.886	0.916062	35.9626	317.694	0.950132	36.3852	888.26	1	0	0	0.870443	54.1738	429.841	0.966877	21.3909	1043.73	0.964124	20.413	570.865	0.951357	23.8959	425.873	0.844341	40.9496	255.555	0.945137	22.8155	383.42	0.950146	30.5793	771.968	0.704499	73.7805	195.53	0.753024	89.2707	377.286	0.752905	89.1631	377.917	0.785051	111.276	590.178
Anxa9	0.973854	5.92091	471.578	0.958448	15.5838	339.614	0.975066	18.1926	1777.32	1	0	0	1	0	0	1	0	0	1	0	0	0.977031	14.3376	476.845	0.92217	20.4748	237.462	0.958852	17.1116	510.024	0.985836	11.1197	1131.89	0.996373	0.580948	79.2205	1	0	0	1	0	0	1	0	0
Ap1ar	0.954322	19.7364	350.391	0.919389	28.77	739.608	0.958444	30.321	1018.84	1	0	0	0.973745	10.418	515.063	0.974238	16.6374	972.664	0.947889	29.8343	422.034	0.968382	15.5324	511.804	0.961085	10.2374	368.231	0.96571	14.2597	1238.93	0.974283	13.8997	731.72	0.906311	18.0094	271.067	0.931996	16.5583	206.382	0.963885	8.49172	830.594	0.962199	12.2281	252.172
Ap1b1	0.860555	31.5782	366.331	0.871081	52.7451	478.675	0.950132	36.3852	981.064	0.915203	43.7097	496.574	0.957992	16.6689	406.458	0.843595	128.345	708.202	0.900933	53.3878	588.023	0.930528	41.8179	743.797	0.955885	17.9155	362.63	0.853379	68.4465	535.803	0.953353	38.9191	519.543	0.794681	45.314	235.321	0.851384	46.7951	356.771	0.847315	48.8274	297.83	0.887809	51.3582	294.474
Ap1g1	0.87838	37.4991	469.622	0.865702	51.5463	351.576	0.991689	6.06421	825.764	0.966081	17.4839	484.69	0.89297	47.923	457.967	0.906643	78.4332	669.108	0.922039	37.6855	358.478	0.920867	46.5971	442.713	0.927333	25.5935	158.673	0.935235	34.2232	347.368	0.951426	33.3592	538.564	0.78894	48.2187	197.773	0.809924	63.3534	317.101	0.854216	46.7045	212.417	0.909334	41.5757	313.95
Ap1m1	0.947708	11.8418	148.786	0.985779	4.79501	368.173	1	0	0	1	0	0	0.973745	10.418	436.437	0.988959	7.13029	751.081	0.989685	4.71069	149.394	0.988515	7.16878	742.812	0.951357	12.7968	122.432	0.986284	5.70387	164.933	0.974283	13.8997	383.698	0.964843	6.39043	136.458	0.959212	9.35902	279.481	0.945827	12.7376	674.266	0.973539	8.5597	230.508
Ap1m2	0.88144	41.4464	424.15	0.904635	38.3601	415.768	0.966755	24.2568	381.887	0.949122	26.2258	985.837	0.975205	12.5016	252.325	0.965996	30.8979	684.833	0.939216	29.8343	562.331	0.942423	29.8699	498.577	0.938533	25.5935	339.693	0.986284	5.70387	376.489	0.943422	30.5793	693.201	0.83149	34.276	248.896	0.867522	36.7162	451.268	0.860947	38.2127	309.811	0.892025	44.0213	438.204
Ap1s1	0.976	7.89454	506.151	0.924942	29.9688	287.091	0.966755	24.2568	1044.64	0.932162	34.9678	666.766	0.942239	22.9197	374.912	1	0	0	0.981063	12.5618	680.481	0.997568	1.1948	331.345	1	0	0	1	0	0	0.979426	11.1197	816.489	0.776113	48.2187	187.48	0.835955	50.3947	320.16	0.775756	67.9338	291.859	0.846187	70.9232	469.86
Ap1s2	0.389651	1503.91	2027.35	0.351817	2262.04	2944.81	0.616251	1400.83	2674.37	0.644727	515.775	1329.19	0.305331	1614.8	2182.18	0.955863	40.405	1515.39	0.833706	235.534	1592.27	1	0	0	0.990271	2.55935	2207.51	1	0	0	1	0	0	0.996373	0.580948	70.7664	0.996862	0.719925	152.999	0.990971	2.12293	2398.08	1	0	0
Ap1s3	0.912496	29.6045	381.5	0.952318	19.18	296.246	0.975066	18.1926	1211.62	0.898243	52.4517	597.182	0.928147	31.2541	482.658	0.885642	83.1868	718.658	0.835664	119.337	764.076	0.806381	131.428	837.269	0.67468	156.12	485.277	0.820054	116.929	796.818	0.814944	161.236	953.894	0.475733	212.627	409.756	0.62685	210.218	449.004	0.583965	222.908	514.999	0.7459	146.738	624.304
Ap2a1	0.930278	15.7891	363.065	0.917868	32.3663	382.164	0.983377	12.1284	732.696	0.983041	8.74195	252.08	0.960778	20.8361	414.853	0.938615	42.7818	788.378	0.941072	32.9748	392.187	0.970814	14.3376	669.889	0.951357	12.7968	352.33	0.931421	28.5194	395.304	0.960392	25.0194	446.715	0.905694	15.1047	143.912	0.905875	21.5977	480.086	0.934206	23.3522	316.194	0.967127	13.451	340.116
Ap2a2	0.902354	29.6045	525.86	0.92399	28.77	477.921	0.93351	48.5137	829.877	0.966081	17.4839	436.459	0.935991	33.3377	222.001	0.924985	54.6656	906.777	0.954693	26.6939	249.668	0.96738	19.1168	624.768	0.951357	12.7968	234.105	0.948776	28.5194	284.997	0.976677	19.4595	304.923	0.888057	23.8189	168.911	0.918146	21.5977	292.014	0.939454	19.1064	403.475	0.943298	18.3422	351.049
Ap2b1	0.900423	27.6309	181.1	0.918759	33.5651	237.789	1	0	0	1	0	0	0.970002	14.5852	281.967	0.944795	35.6515	754.142	0.957302	23.5534	497.171	0.957004	22.7012	259.242	0.944422	17.9155	142.768	0.931145	42.779	547.327	0.938279	33.3592	391.064	0.878083	26.1427	208.925	0.869768	38.156	314.312	0.932561	23.3522	141.394	0.935738	20.7878	226.314
Ap2m1	0.753002	82.8927	217.045	0.799646	103.093	312.121	0.911154	72.7705	881.223	0.966081	17.4839	406.63	0.8224	91.6787	514.773	0.902954	68.9262	747.825	0.882144	65.9496	533.332	0.906354	53.7659	749.361	0.77525	69.1025	380.616	0.889268	57.0387	626.585	0.946333	36.1391	472.332	0.622222	120.837	253.118	0.710051	109.429	380.582	0.770444	87.0401	386.411	0.804707	97.8251	521.205
Ap2s1	0.780994	80.9191	280.191	0.771504	129.465	616.946	0.893669	115.22	1074.49	0.949122	26.2258	713.957	0.760196	141.685	546.352	0.849542	133.099	846.821	0.739782	202.559	828.866	0.85388	108.727	734.604	0.702057	125.408	428.862	0.878688	68.4465	522.497	0.880709	88.9578	1055.82	0.515328	186.484	418.646	0.606234	183.581	478.906	0.558033	201.678	619.754	0.668877	229.889	719.766
Ap3b1	0.876542	35.5255	168.247	0.909817	39.5588	279.673	0.966755	24.2568	535.859	1	0	0	0.963243	14.5852	596.422	0.974238	16.6374	713.76	0.981585	14.1321	170.244	0.954574	23.8959	510.074	0.970814	7.67805	173.968	0.993142	2.85194	968.992	0.950146	30.5793	771.613	0.920713	15.6856	147.111	0.917977	25.1974	201.542	0.885467	29.721	263.311	0.924398	24.4563	332.138
Ap3b2	1	0	0	0.985779	4.79501	150.846	1	0	0	0.932162	34.9678	701.273	0.844247	100.013	550.525	0.902174	78.4332	877.66	0.93983	39.2557	438.892	1	0	0	1	0	0	1	0	0	1	0	0	1	0	0	1	0	0	1	0	0	0.99622	1.22281	378.215
Ap3d1	0.895417	23.6836	369.159	0.880794	47.9501	570.306	0.96896	30.321	1499.61	0.983041	8.74195	593.472	0.922905	33.3377	446.905	0.921315	57.0424	750.227	0.929917	36.1153	372.943	0.955057	31.0647	377.127	0.910114	33.2716	200.873	0.919848	37.0752	719.281	0.943422	30.5793	363.883	0.809599	40.0854	223.582	0.858056	41.7556	409.576	0.881028	38.2127	206.696	0.931463	26.9019	400.15
Ap3m1	0.928001	23.6836	409.552	0.943116	19.18	404.061	0.950132	36.3852	426.306	0.949122	26.2258	648.687	0.943867	25.0033	421.988	0.927585	49.9121	738.927	0.943622	29.8343	534.197	0.961862	20.3116	590.884	0.951357	12.7968	484.105	0.958852	17.1116	514.174	0.960392	25.0194	1043.51	0.843239	29.6284	230.4	0.861807	34.5564	282.135	0.864568	33.9669	315.435	0.922732	34.2388	459.241
Ap3s1	0.857454	49.3409	374.604	0.892913	53.9438	500.784	0.975066	18.1926	691.515	1	0	0	0.917661	35.4213	637.297	0.955836	28.5212	835.145	0.962178	17.2725	554.092	0.971574	15.5324	608.85	0.931899	17.9155	396.239	0.972568	11.4077	261.822	0.979426	11.1197	682.234	0.71742	66.8091	268.876	0.830097	48.235	281.639	0.843202	38.2127	436.71	0.88542	46.4669	425.371
Ap3s2	0.930278	15.7891	710.228	0.959379	16.7825	366.587	0.983377	12.1284	471.903	0.983041	8.74195	311.526	0.963243	14.5852	307.837	0.992639	4.75353	786.974	0.965616	15.7023	339.005	0.987839	5.97399	731.254	0.980543	5.1187	394.115	0.993142	2.85194	222.469	0.989713	5.55986	422.739	0.860343	26.7236	197.821	0.912721	23.7575	395.022	0.863163	42.4586	292.211	0.919182	29.3475	492.264
Ap4b1	1	0	0	0.982224	5.99376	332.537	0.991689	6.06421	877.193	1	0	0	0.98554	8.33443	127.133	0.966877	21.3909	812.942	0.975931	10.9916	225.321	0.988515	7.16878	294.009	0.980543	5.1187	624.721	0.972568	11.4077	216.637	0.963996	19.4595	383.481	0.964843	6.39043	278.567	0.971762	6.47932	429.895	0.963885	8.49172	239.024	0.984879	4.89126	98.0057
Ap4e1	0.982569	3.94727	115.012	0.982224	5.99376	216.456	1	0	0	0.983041	8.74195	187.196	0.989498	4.16721	115.471	0.985279	9.50706	572.873	0.970927	17.2725	592.14	0.995136	2.38959	115.854	1	0	0	0.993142	2.85194	220.41	0.989713	5.55986	475.846	0.978237	3.48569	100.384	0.959212	9.35902	157.979	0.972914	6.36879	113.495	0.99622	1.22281	100.21
Ap4s1	0.860555	31.5782	182.241	0.914329	33.5651	276.65	1	0	0	0.983041	8.74195	397.456	0.970002	14.5852	670.667	0.974238	16.6374	476.948	0.962178	17.2725	464.769	0.971574	15.5324	507.645	0.980543	5.1187	104.609	0.96571	14.2597	648.362	0.969139	16.6796	1221.93	0.80991	37.1807	202.098	0.872335	41.7556	337.512	0.861228	31.844	389.064	0.892776	37.9072	433.234
Ap5m1	0.991285	1.97364	152.393	0.985779	4.79501	378.223	0.991689	6.06421	1697.79	1	0	0	0.989498	4.16721	133.121	0.99632	2.37676	974.659	0.993123	3.14046	1401.3	0.990271	4.77919	175.16	0.980543	5.1187	641.358	0.99419	5.70387	483.442	0.994857	2.77993	190.84	0.950368	8.71423	130.77	0.968625	7.19925	110.713	0.972914	6.36879	309.105	1	0	0
Ap5s1	0.956424	9.86818	142.955	0.952318	19.18	226.178	0.958444	30.321	1962.47	1	0	0	0.978996	8.33443	321.868	0.988959	7.13029	533.401	0.986247	6.28091	252.891	0.990271	4.77919	204.458	0.980543	5.1187	82.5554	0.986284	5.70387	968.498	0.989713	5.55986	879.662	0.963728	5.80948	119.088	0.944535	14.3985	243.035	0.954856	10.6147	279.558	0.959591	14.6738	159.102
Ap5z1	0.956424	9.86818	146.777	0.968003	10.7888	878.494	1	0	0	1	0	0	1	0	0	0.981598	11.8838	523.997	0.986247	6.28091	446.887	0.98369	9.55838	989.247	0.990271	2.55935	88.9284	1	0	0	0.994857	2.77993	257.865	0.960101	6.39043	206.105	0.984312	3.59962	185.317	0.963885	8.49172	120.074	0.978405	8.5597	410.768
Apba3	0.947708	11.8418	224.723	0.958448	15.5838	708.886	1	0	0	1	0	0	0.989498	4.16721	1087.93	0.955836	28.5212	696.145	0.975931	10.9916	225.566	0.97811	10.7532	589.967	0.961085	10.2374	140.801	0.979426	8.55581	206.601	0.98457	8.3398	384.506	0.889871	19.1713	196.882	0.93725	15.1184	219.128	0.915213	19.1064	164.948	0.939518	20.7878	375.199
Apbb3	0.991285	1.97364	588.235	0.964448	11.9875	476.033	0.991689	6.06421	316.756	1	0	0	0.973745	10.418	942.456	0.974238	16.6374	472.453	0.986247	6.28091	439.152	0.98369	9.55838	672.892	0.980543	5.1187	346.359	0.979426	8.55581	421.905	0.979426	11.1197	649.474	0.987049	3.48569	133.002	0.974081	8.6391	471.645	0.963885	8.49172	101.478	0.977319	7.33688	161.303
Apc	0.906834	23.6836	334.214	0.884001	52.7451	459.881	0.991689	6.06421	2298.85	0.983041	8.74195	340.02	0.957992	16.6689	706.546	0.939654	45.1585	907.272	0.950466	26.6939	643.722	0.96738	19.1168	407.812	0.931899	17.9155	308.413	0.958852	17.1116	570.476	0.945017	33.3592	1019.04	0.801467	47.6378	162.073	0.825323	51.1147	373.094	0.845262	48.8274	268.277	0.944258	25.6791	507.463
Apeh	0.883112	31.5782	225.224	0.915836	29.9688	245.474	0.966755	24.2568	447.072	1	0	0	0.928147	31.2541	334.983	0.934938	45.1585	1037.32	0.957302	23.5534	593.173	0.96595	16.7272	362.254	0.941628	15.3561	160.301	0.951994	19.9636	484.397	0.938279	33.3592	475.121	0.921383	13.9428	186.674	0.9247	17.2782	217.504	0.924179	16.9834	432.107	0.939518	20.7878	390.02
Apex1	0.806419	61.1827	325.651	0.799073	101.894	510.814	0.935998	54.5779	1237.85	0.932162	34.9678	532.003	0.8554	83.3443	651.594	0.977918	14.2606	498.628	0.875319	69.0901	812.307	0.882748	72.8826	692.828	0.80318	94.696	450.468	0.897131	42.779	669.777	0.882466	77.8381	889.802	0.732872	74.9424	326.869	0.776349	82.0714	329.402	0.755713	93.4089	327.072	0.816319	86.8198	592.326
Apex2	0.991285	1.97364	128.7	1	0	0	0.991689	6.06421	605.327	0.983041	8.74195	2247.19	0.952741	18.7525	396.589	0.974238	16.6374	583.411	0.970927	17.2725	207.77	0.995136	2.38959	517.146	0.990271	2.55935	1445.09	0.993142	2.85194	222.469	0.989713	5.55986	389.59	0.989118	1.74285	97.8004	0.98745	2.8797	245.809	0.990971	2.12293	1494.77	0.99622	1.22281	204.583
Aph1a	0.904132	21.71	115.695	0.928476	28.77	302.948	0.983377	12.1284	1318.64	0.953298	34.9678	789.007	0.9139	39.5885	597.594	0.945966	38.0282	811.245	0.909386	53.3878	447.012	0.916633	50.1815	453.725	0.859847	43.509	253.172	0.899313	45.631	394.467	0.92962	41.699	502.718	0.750294	58.6758	211.97	0.834628	49.6748	250.33	0.82431	59.4421	253.103	0.900813	51.3582	284.828
Aph1c	1	0	0	0.971558	9.59001	531.479	0.983377	12.1284	1226.89	0.932162	34.9678	508.534	0.984247	6.25082	542.699	0.963196	23.7676	359.315	0.980357	10.9916	707.3	0.987839	5.97399	303.28	1	0	0	0.979426	8.55581	208.399	1	0	0	1	0	0	0.996862	0.719925	974.659	0.990971	2.12293	713.267	1	0	0
Api5	0.946081	21.71	214.803	0.902704	35.9626	429.898	0.966755	24.2568	1441.46	1	0	0	0.912273	47.923	601.79	0.945966	38.0282	713.198	0.936464	40.8259	640.632	0.973246	13.1428	487.713	0.93476	20.4748	523.924	0.945137	22.8155	576.179	0.950146	30.5793	846.532	0.868108	28.4665	233.01	0.889343	30.9568	262.651	0.894477	27.5981	242.692	0.923952	29.3475	322.873
Apip	0.956424	9.86818	429.267	0.915836	29.9688	617.087	0.983377	12.1284	575.847	0.949122	26.2258	448.881	0.95041	25.0033	1068.62	0.956986	30.8979	669.794	0.92484	42.3962	886.081	0.973246	13.1428	728.876	0.864239	48.6277	655.288	0.958852	17.1116	694.933	0.976677	19.4595	301.878	0.845022	30.7903	386.193	0.857544	45.3553	353.444	0.875686	42.4586	397.801	0.904898	41.5757	457.738
Aplp2	0.700234	92.7609	523.897	0.770852	118.676	571.885	0.816265	157.669	804.161	0.796486	104.903	579.041	0.833321	102.097	1018.73	0.757892	249.56	1092.7	0.81539	139.75	839.413	0.877492	88.415	732.167	0.81069	69.1025	464.492	0.759979	142.597	607.33	0.75786	291.893	1648.05	0.513213	561.777	748.373	0.43718	684.648	1077.36	0.449613	755.763	1253.56	0.535634	770.373	1295.22
Apmap	0.824993	59.2091	417.632	0.875345	46.7513	564.102	0.935998	54.5779	855.486	0.847365	78.6775	553.244	0.933389	29.1705	433.039	0.826217	142.606	967.843	0.874456	67.5198	777.251	0.964291	19.1168	200.544	0.961085	10.2374	300.137	0.897552	57.0387	514.877	0.953709	25.0194	703.389	0.915149	18.0094	257.32	0.901036	27.3571	283.062	0.909712	21.2293	480.901	0.936951	23.2335	331.725
Apoa1bp	0.837256	49.3409	210.944	0.883412	45.5526	372.714	0.950132	36.3852	775.516	0.864324	69.9356	557.422	0.886407	58.341	719.009	0.884581	80.81	1000.56	0.857975	94.2137	570.081	0.920141	51.3763	640.808	0.832955	69.1025	401.619	0.87566	62.7426	490.641	0.85692	91.7378	769.416	0.648249	97.0184	254.631	0.663823	150.464	521.937	0.625233	116.761	422.374	0.731882	132.064	474.587
Apobec3	0.982569	3.94727	155.508	0.989334	3.59626	82.7949	0.991689	6.06421	526.316	1	0	0	0.989498	4.16721	464.84	0.988959	7.13029	415.005	0.986247	6.28091	604.844	0.995136	2.38959	194.175	1	0	0	0.993142	2.85194	325.627	1	0	0	0.985491	2.32379	75.4283	0.956075	10.0789	495.101	1	0	0	0.973539	8.5597	502.346
Apobr	0.950212	13.8155	240.864	0.967152	15.5838	515.107	1	0	0	1	0	0	0.940004	29.1705	620.657	0.981598	11.8838	491.059	0.986247	6.28091	384.811	0.98369	9.55838	819.804	0.97321	10.2374	307.561	0.986284	5.70387	470.411	0.994857	2.77993	1293.66	0.981864	2.90474	528.218	0.993725	1.43985	295.624	0.972914	6.36879	308.348	1	0	0
Apoc1	0.891589	47.3673	658.937	0.922834	40.7576	989.499	0.966755	24.2568	1030.78	0.966081	17.4839	1556.4	0.984247	6.25082	504.683	1	0	0	0.980201	18.8427	1472.51	0.987839	5.97399	1756.56	0.980543	5.1187	590.48	0.974388	14.2597	845.909	0.959	38.9191	1828.16	0.628863	256.198	1050.09	0.679736	262.053	1071.83	0.752855	288.719	1647.13	0.78821	266.573	1425.35
Apod	0.969821	13.8155	750.383	0.960892	13.1863	572.594	1	0	0	0.983041	8.74195	230.362	0.989498	4.16721	1230.19	0.966877	21.3909	1098.47	0.974318	15.7023	1279.45	0.987839	5.97399	1338.42	0.980543	5.1187	654.37	0.988686	14.2597	1435.9	0.98457	8.3398	1663.07	0.980573	4.64759	1040.35	0.95313	14.3985	1183.44	0.957367	12.7376	1609.04	0.984879	4.89126	983.558
Apoe	0.877646	80.9191	2080.62	0.696061	2934.54	9052.04	0.870003	388.109	3669.1	0.955089	262.258	6426.88	0.634258	602.162	4749.11	0.883392	449.209	4207.79	0.79995	445.945	4156.88	0.981623	38.2335	2694.13	0.983515	10.2374	790.473	0.977375	31.3713	1764.08	0.991787	61.1585	2384.09	0.916838	91.7899	2384.66	0.885066	125.267	2897.08	0.850722	165.589	2600.57	0.978602	26.9019	1493.59
Apom	0.991285	1.97364	1213.59	0.983212	7.19251	815.059	0.983377	12.1284	407.946	1	0	0	0.995731	6.25082	321.75	1	0	0	0.986247	6.28091	1233.32	0.992703	3.58439	678.298	0.970814	7.67805	502.242	0.993142	2.85194	261.986	1	0	0	0.941965	9.29518	339.528	0.976565	7.19925	429.838	0.963885	8.49172	200.693	0.973539	9.78251	257.969
Apoo	0.854636	35.5255	138.866	0.939561	20.3788	287.623	0.958444	30.321	472.233	0.966081	17.4839	368.738	0.924352	35.4213	474.548	0.967994	23.7676	786.031	0.939216	29.8343	477.553	0.975678	11.948	628.96	0.944422	17.9155	373.377	0.956671	28.5194	634.028	0.960392	25.0194	414.31	0.767578	45.314	367.005	0.808305	53.2744	378.572	0.822349	48.8274	378.058	0.82724	68.4776	542.17
Apool	0.924209	19.7364	182.238	0.95585	17.9813	623.266	0.985162	18.1926	2204.21	0.966081	17.4839	443.45	0.964787	16.6689	803.8	0.94229	40.405	770.35	0.940198	31.4046	864.276	0.964291	19.1168	612.689	0.982632	7.67805	398.601	0.96223	22.8155	268.761	0.948566	27.7993	614.189	0.881053	22.076	248.009	0.867522	35.9962	312.305	0.894477	27.5981	278.036	0.89655	36.6844	405.246
Apopt1	0.926309	21.71	278.718	0.897565	40.7576	545.807	0.95252	42.4495	882.486	1	0	0	0.904794	45.8393	397.536	0.977918	14.2606	1000.44	0.926489	37.6855	669.363	0.957004	22.7012	713.483	0.883256	30.7122	444.54	0.993142	2.85194	225.632	0.969139	16.6796	1121.23	0.676834	75.5233	325.305	0.805128	62.6335	267.088	0.844972	57.3191	298.871	0.840167	75.8145	455.256
App	0.782427	69.0773	465.536	0.750131	125.869	482.105	0.947489	60.6421	840.211	0.932162	34.9678	723.337	0.900493	68.759	697.72	0.602272	470.599	1170.23	0.793451	219.832	876.309	0.924773	56.1555	817.907	0.936897	23.0342	291.259	0.858418	77.0023	427.072	0.872527	100.078	1026.44	0.681086	114.447	268.066	0.67264	148.305	457.224	0.706927	157.097	521.127	0.778307	114.944	712.626
Appbp2	0.941556	15.7891	236.324	0.927535	27.5713	290.697	0.991689	6.06421	1406.47	0.966081	17.4839	274.561	0.929574	33.3377	408.509	0.966877	21.3909	478.545	0.927608	48.6771	381.486	0.933499	41.8179	625.517	0.892839	40.9496	418.055	0.972568	11.4077	244.577	0.939886	36.1391	894.976	0.898143	18.5904	195.431	0.908766	23.7575	382.152	0.885467	29.721	399.622	0.960558	15.8966	314.701
Appl1	0.947708	11.8418	117.417	0.916897	31.1675	486.549	0.95252	42.4495	750.705	0.983041	8.74195	565.611	0.901926	41.6721	565.733	0.963196	23.7676	597.833	0.935782	31.4046	663.538	0.948652	29.8699	650.382	0.915396	25.5935	216.651	0.938279	25.6674	357.028	0.963996	19.4595	791.24	0.785315	45.314	144.936	0.824611	50.3947	358.648	0.766786	67.9338	387.775	0.906115	36.6844	443.788
Appl2	0.956424	9.86818	136.83	0.90873	32.3663	568.297	0.966755	24.2568	481.04	1	0	0	0.975205	12.5016	430.3	0.954296	35.6515	364.513	0.949518	25.1237	480.729	0.990271	4.77919	872.583	0.990271	2.55935	712.758	0.96571	14.2597	222.571	0.994857	2.77993	287.604	0.967356	5.22854	235.606	0.9602	10.0789	239.648	0.972914	6.36879	940.977	0.99244	2.44563	222.578
Aprt	1	0	0	0.972623	10.7888	768.085	0.991689	6.06421	444.642	1	0	0	0.994749	2.08361	75.4489	1	0	0	0.993123	3.14046	358.742	0.985407	7.16878	1197.33	0.93476	20.4748	346.53	0.993142	2.85194	229.41	0.963996	19.4595	701.932	0.719923	78.428	276.933	0.787604	72.7124	423.582	0.797683	65.8108	246.22	0.836628	63.5863	464.571
Aptx	0.904132	21.71	172.016	0.947803	19.18	342.989	1	0	0	1	0	0	0.947489	20.8361	484.832	0.963196	23.7676	667.504	0.948425	23.5534	1024.28	0.985407	7.16878	537.7	0.980543	5.1187	165.442	0.979426	8.55581	236.274	0.98457	8.3398	400.149	0.811699	35.4379	246.736	0.903169	29.5169	357.696	0.923658	23.3522	147.648	0.921116	31.7932	360.777
Aqp11	0.991285	1.97364	250	0.975113	8.39126	535.605	0.966755	24.2568	827.585	0.966081	17.4839	375.819	0.984247	6.25082	977.418	0.970557	19.0141	977.631	0.975931	10.9916	616.941	0.94017	37.0387	645.006	0.951357	12.7968	345.728	0.908022	45.631	667.128	0.98457	8.3398	616.349	0.967356	5.22854	213.576	0.978037	5.03947	277.481	0.981942	4.24586	1267.83	0.99244	2.44563	127.446
Aqp2	0.991285	1.97364	1351.35	1	0	0	1	0	0	1	0	0	1	0	0	1	0	0	0.997259	10.9916	756.266	0.993818	7.16878	1338.32	0.965096	30.7122	271.726	1	0	0	0.883827	439.229	5352.36	0.339287	2698.51	3252.4	0.328808	2878.98	4069.46	0.244667	2893.55	3625.77	0.33083	3201.33	4195.09
Aqp9	0.934903	19.7364	172.955	0.966425	14.385	426.784	0.985162	18.1926	1601.22	0.949122	26.2258	1203.91	0.959564	18.7525	315.652	0.849542	133.099	900.763	0.913722	45.5366	726.471	0.9287	51.3763	405.984	0.837734	46.0683	253.352	0.832284	108.374	503.647	0.850324	105.637	982.231	0.755946	63.9043	186.629	0.822161	60.4737	320.981	0.85493	59.4421	275.441	0.867699	62.3635	390.021
Aqr	0.956424	9.86818	377.31	0.948782	20.3788	583	0.975066	18.1926	912.832	1	0	0	0.978996	8.33443	624.961	0.981598	11.8838	947.304	0.993123	3.14046	1732.26	0.980543	9.55838	887.626	0.97321	10.2374	131.508	0.986284	5.70387	253.759	0.989713	5.55986	580.293	0.952847	7.55233	135.773	0.956075	10.0789	377.25	0.954856	12.7376	255.381	0.99244	2.44563	81.9047
Ar	0.856003	47.3673	328.564	0.9117	35.9626	248.575	0.975066	18.1926	752.25	0.966081	17.4839	361.018	0.945211	27.0869	267.271	0.952155	30.8979	550.661	0.964124	20.413	395.157	0.982975	8.36358	379.56	0.961085	10.2374	142.446	0.993142	2.85194	220.848	0.989713	5.55986	213.185	0.913515	17.4285	122.855	0.907871	23.7575	161.347	0.896841	29.721	267.804	0.948275	18.3422	252.167
Araf	0.779005	120.392	349.539	0.716344	245.744	897.93	0.82656	157.669	867.627	0.949122	26.2258	279.93	0.883917	54.1738	552.643	0.936925	49.9121	658.353	0.941072	32.9748	450.011	0.937177	37.0387	446.704	0.902713	25.5935	359.916	0.938279	25.6674	643.847	0.938279	33.3592	553.804	0.772066	44.733	234.071	0.837035	47.515	181.459	0.845262	46.7045	214.264	0.905146	35.4616	532.875
Arap1	0.947708	11.8418	502.374	0.928476	28.77	502.623	0.983377	12.1284	559.341	0.983041	8.74195	252.08	0.963243	14.5852	305.348	0.974238	16.6374	1052.91	0.982808	7.85114	181.386	0.980543	9.55838	275.395	0.990271	2.55935	124.719	0.96571	14.2597	272.403	0.963996	19.4595	535.08	0.944137	10.4571	175.147	0.978037	5.03947	314.691	0.959622	8.49172	151.441	0.983095	4.89126	116.725
Arap2	0.930278	15.7891	500.719	0.925809	31.1675	522.601	0.95252	42.4495	677.909	0.983041	8.74195	361.925	0.954335	20.8361	538.783	0.977918	14.2606	1110.51	0.969055	14.1321	580.056	0.979435	13.1428	485.965	0.951357	12.7968	205.95	0.972568	11.4077	148.506	0.974283	13.8997	515.856	0.879271	23.8189	153.796	0.919713	23.7575	297.453	0.910552	19.1064	334.134	0.953211	14.6738	228.876
Arc	0.865279	65.13	327.42	0.922478	50.3476	851.619	0.991689	6.06421	203.128	1	0	0	0.989498	4.16721	1559.64	0.977918	14.2606	608.764	0.993123	3.14046	1742.45	0.995658	3.58439	333.206	1	0	0	0.986284	5.70387	326.535	0.994857	2.77993	83.8785	0.996373	0.580948	90.9918	0.993725	1.43985	638.612	0.981942	4.24586	81.233	1	0	0
Arcn1	0.789986	55.2618	230.336	0.856035	56.3413	339.304	0.975066	18.1926	1193.63	0.966081	17.4839	445.123	0.861614	70.8426	303.834	0.917531	71.3029	657.771	0.89249	70.6603	682.524	0.919046	48.9867	648.446	0.794608	63.9838	202.116	0.94719	25.6674	801.917	0.932225	47.2588	849.912	0.715557	73.1995	206.193	0.764214	84.9511	329.076	0.76001	74.3026	404.723	0.849176	68.4776	414.043
Areg	0.992616	3.94727	283.768	0.990964	7.19251	1178.43	0.991689	6.06421	2506.27	1	0	0	0.994749	2.08361	2298.85	0.961027	45.1585	733.083	0.974318	15.7023	1016.8	0.956221	21.5064	1092.14	0.980543	5.1187	283.327	0.951994	19.9636	287.689	0.965508	22.2395	1137.08	1	0	0	1	0	0	1	0	0	1	0	0
Arel1	0.924209	19.7364	245.428	0.950227	16.7825	347.838	0.966755	24.2568	784.172	0.983041	8.74195	361.925	0.975205	12.5016	985.072	0.945966	38.0282	562.24	0.959814	20.413	267.853	0.97275	17.922	1044.65	0.970814	7.67805	129.261	0.945137	22.8155	287.611	0.943422	30.5793	583.415	0.83423	32.5331	171.802	0.887116	41.7556	348.509	0.864568	33.9669	330.319	0.927709	28.1247	259.804
Arf1	0.64852	201.311	545.043	0.711266	280.508	860.406	0.716007	388.109	1057.55	0.715447	375.904	826.805	0.762848	212.528	958.002	0.756154	304.226	939.38	0.679935	394.127	1274.84	0.768982	219.843	846.68	0.644964	217.545	588.254	0.57444	336.528	816.561	0.665479	358.611	958.524	0.41127	502.52	672.081	0.40577	525.545	858.332	0.426277	473.413	774.351	0.589529	451.218	942.401
Arf2	1	0	0	0.96554	13.1863	758.948	0.983377	12.1284	599.252	0.949122	26.2258	301.708	0.952377	29.1705	425.503	0.940575	47.5353	861.089	0.922039	37.6855	437.873	0.959367	27.4803	505.496	0.941628	15.3561	271.574	0.926689	34.2232	579.317	0.969139	16.6796	616.164	0.881053	22.076	246.788	0.908005	26.6372	231.131	0.921483	21.2293	360.851	0.936951	23.2335	291.837
Arf3	0.709131	104.603	422.839	0.799354	111.484	497.568	0.916887	60.6421	947.84	0.895077	96.1614	595.395	0.829701	93.7623	399.503	0.827238	133.099	844.146	0.869618	124.048	555.907	0.893659	78.8566	508.693	0.878421	53.7464	357.325	0.818982	114.077	485.075	0.898887	72.2782	378.289	0.689736	95.2756	226.461	0.747525	97.1898	332.667	0.786834	67.9338	421.496	0.861642	67.2548	408.646
Arf4	0.758957	199.337	501.452	0.811149	216.974	770.607	0.851357	394.174	1448.83	0.714297	760.549	1517.5	0.775089	479.23	1421.52	0.82244	387.413	1392.53	0.845596	243.385	1079.17	0.769991	256.881	1159.51	0.58207	327.597	806.433	0.600273	530.46	1048.69	0.669619	489.268	1221.1	0.462675	471.149	808.481	0.489041	482.35	914.115	0.472916	439.447	897.879	0.567869	514.805	1078.1
Arf5	0.70295	151.97	603.114	0.741594	191.8	756.053	0.842466	181.926	754.541	0.839568	174.839	552.868	0.777555	208.361	897.648	0.839672	159.243	1045.45	0.752801	270.079	1066.65	0.757529	193.557	1019.65	0.690923	248.257	618.296	0.718403	196.784	713.433	0.735814	227.954	995.891	0.44394	313.712	554.522	0.521889	318.927	712.634	0.606636	316.317	740.518	0.656493	278.802	728.582
Arf6	0.799489	65.13	244.442	0.850887	75.5214	480.253	0.950132	36.3852	628.732	0.949122	26.2258	331.173	0.833836	89.5951	591.279	0.886636	85.5635	696.709	0.819139	139.75	657.478	0.872833	83.6358	817.01	0.747587	92.1366	540.203	0.883415	48.4829	446.277	0.933276	50.0388	934.267	0.64732	95.8565	251.172	0.794589	67.6729	301.761	0.719454	78.5484	512.081	0.835615	67.2548	580.311
Arfgap1	0.789986	55.2618	405.777	0.790935	101.894	646.777	0.941821	42.4495	616.14	0.915203	43.7097	820.808	0.820444	114.598	358.894	0.861057	128.345	736.936	0.824827	133.469	560.223	0.883076	97.9734	648.975	0.879187	38.3903	367.305	0.863682	71.2984	570.739	0.947432	38.9191	441.059	0.813509	37.1807	180.594	0.84583	49.6748	284.825	0.847315	48.8274	312.117	0.91164	31.7932	485.133
Arfgap2	0.857097	37.4991	285.962	0.875345	46.7513	572.037	0.944265	48.5137	989.72	0.915203	43.7097	700.77	0.920417	39.5885	250.641	0.912247	68.9262	919.697	0.934298	45.5366	453.095	0.945575	29.8699	719.828	0.94642	20.4748	128.359	0.892465	48.4829	719.447	0.942373	41.699	789.486	0.804994	47.0568	215.858	0.850114	45.3553	283.375	0.881028	36.0898	230.942	0.892904	45.2441	416.671
Arfgap3	0.880002	39.4727	582.778	0.864439	62.3351	670.508	0.975066	18.1926	1309.07	0.949122	26.2258	1040.36	0.938629	27.0869	398.419	0.932322	49.9121	746.934	0.956383	21.9832	716.573	0.936417	41.8179	789.469	0.912442	23.0342	305.38	0.90616	42.779	650.16	0.950146	30.5793	618.49	0.882626	20.3332	221.759	0.896295	30.9568	285.001	0.858425	38.2127	300.582	0.935738	20.7878	362.512
Arfgef1	0.790512	80.9191	321.537	0.799336	87.5089	546.986	0.96896	30.321	450.5	0.953298	34.9678	290.163	0.86005	95.8459	546.842	0.860125	111.708	656.364	0.884729	81.6519	367.08	0.929276	39.4283	556.601	0.866049	51.187	239.034	0.863682	71.2984	365.696	0.892667	72.2782	874.484	0.740213	74.3614	162.775	0.756547	94.3101	371.557	0.805348	78.5484	342.716	0.884233	61.1407	284.684
Arfgef2	0.916813	37.4991	330.637	0.83126	117.478	681.03	0.902246	254.697	3434.47	0.983041	8.74195	286.205	0.964787	16.6689	871.451	0.939654	45.1585	813.87	0.965616	15.7023	498.207	0.96127	25.0907	301.501	0.963667	12.7968	146.873	0.924563	31.3713	328.882	0.969139	16.6796	415.6	0.924308	15.1047	158.013	0.95792	11.5188	249.285	0.933124	14.8605	174.301	0.973539	9.78251	431.765
Arfip1	0.869271	29.6045	330.95	0.898626	49.1488	457.496	0.946091	54.5779	1169.86	0.953298	34.9678	643.504	0.892665	58.341	729.026	0.891931	76.0565	886.795	0.888965	62.8091	722.068	0.926154	39.4283	690.555	0.852555	48.6277	419.601	0.972568	11.4077	266.239	0.955271	27.7993	666.095	0.742145	62.1615	251.289	0.811867	61.9135	364.18	0.863566	59.4421	207.086	0.827052	63.5863	389.359
Arfip2	0.861217	41.4464	446.15	0.84457	64.7326	423.284	0.941821	42.4495	508.912	0.949122	26.2258	577.304	0.924352	35.4213	480.423	0.935989	47.5353	678.563	0.918017	45.5366	539.183	0.920241	45.4023	651.449	0.871805	43.509	313.097	0.890273	45.631	436.18	0.938279	33.3592	560.687	0.788298	40.6664	159.619	0.795633	52.5545	268.054	0.833162	55.1962	377.963	0.907012	37.9072	291.771
Arfrp1	0.928001	23.6836	492.004	0.905176	33.5651	464.214	0.983377	12.1284	517.909	0.983041	8.74195	345.662	0.952741	18.7525	382.488	0.948475	33.2747	485.052	0.964859	21.9832	490.895	0.969147	16.7272	449.559	0.963667	12.7968	252.774	0.951994	19.9636	560.457	0.969139	16.6796	1103.22	0.857664	27.8855	185.803	0.893122	27.3571	297.574	0.912486	25.4752	159.174	0.921116	31.7932	377.354
Arg2	0.947708	11.8418	494.784	0.892055	39.5588	722.837	0.966755	24.2568	1199.56	0.983041	8.74195	187.196	0.929574	33.3377	383.871	0.974238	16.6374	901.54	0.962127	25.1237	461.684	0.947894	34.6491	439.224	0.831428	66.5431	449.419	0.883415	48.4829	549.086	0.946333	36.1391	337.527	0.688404	70.8757	263.071	0.705684	107.989	429.05	0.670496	157.097	442.42	0.715568	177.308	636.504
Arglu1	0.621145	226.968	547.33	0.590125	291.297	852.832	0.92581	90.9631	1283.3	0.949122	26.2258	857.654	0.752306	187.525	622.846	0.828147	135.476	753.394	0.842904	149.172	706.957	0.838903	121.869	729.921	0.723347	125.408	458.869	0.865063	59.8907	492.561	0.868381	88.9578	909.19	0.615185	144.075	295.053	0.678547	175.662	482.255	0.681983	137.99	456.366	0.796601	132.064	453.509
Arhgap1	0.909065	25.6573	226.224	0.939878	26.3725	375.785	0.975066	18.1926	801.803	0.949122	26.2258	301.72	0.978996	8.33443	121.737	0.94964	35.6515	737.48	0.965616	15.7023	391.225	0.970814	14.3376	541.868	0.982632	7.67805	133.39	0.96571	14.2597	235.208	0.98457	8.3398	1269.91	0.850014	26.1427	142.443	0.933761	17.9981	185.429	0.939454	16.9834	204.828	0.952048	17.1194	395.612
Arhgap10	0.991285	1.97364	98.2801	0.982224	5.99376	557.706	0.991689	6.06421	1923.08	1	0	0	1	0	0	1	0	0	0.996562	1.57023	158.932	0.997568	1.1948	715.308	1	0	0	0.986284	5.70387	708.665	0.989713	5.55986	1546.83	0.887283	23.2379	160.967	0.946942	15.8383	262.527	0.963885	8.49172	266.391	0.934254	24.4563	252.254
Arhgap11a	0.973854	5.92091	296.156	0.958448	15.5838	703.696	1	0	0	1	0	0	0.973745	10.418	764.506	0.988959	7.13029	411.995	0.97937	9.42137	736.637	0.997568	1.1948	89.2061	1	0	0	0.993142	2.85194	1798.56	1	0	0	0.992746	1.1619	78.8237	0.98745	2.8797	317.164	0.968736	14.8605	818.383	0.99622	1.22281	2777.78
Arhgap12	0.915524	21.71	269.644	0.928476	28.77	627.931	0.983377	12.1284	265.004	1	0	0	0.973745	10.418	230.816	0.955836	28.5212	493.603	0.969055	14.1321	697.028	0.974	14.3376	510.409	0.970814	7.67805	252.485	0.979426	8.55581	371.358	0.974283	13.8997	807.224	0.919435	18.0094	145.946	0.91502	22.3177	298.149	0.921483	21.2293	311.453	0.954639	14.6738	291.227
Arhgap17	0.886701	25.6573	251.647	0.882487	50.3476	653.963	0.975066	18.1926	316.322	1	0	0	0.978996	8.33443	772.416	0.953314	33.2747	443.886	0.953885	25.1237	193.358	0.952851	26.2855	529.701	0.944422	17.9155	307.457	0.96571	14.2597	509.921	0.979426	11.1197	669.613	0.952847	7.55233	305.805	0.943525	12.9586	161.835	0.990971	2.12293	142.066	0.973539	8.5597	492.016
Arhgap18	0.991285	1.97364	71.8649	0.99289	2.3975	1069.34	0.991689	6.06421	236.518	1	0	0	0.947489	20.8361	382.718	0.966877	21.3909	690.962	0.970099	15.7023	387.572	0.979435	13.1428	975.137	0.970814	7.67805	115.326	0.993142	2.85194	222.222	0.965508	22.2395	652.453	0.749471	66.2281	192.114	0.710323	115.908	418.414	0.770031	101.901	305.625	0.80591	92.9338	579.354
Arhgap21	0.906834	23.6836	376.129	0.931079	26.3725	380.745	0.966755	24.2568	638.023	0.966081	17.4839	282.552	0.931736	27.0869	515.681	0.95064	38.0282	485.052	0.974944	17.2725	398.112	0.963517	17.922	520.756	0.941628	15.3561	198.407	0.923163	42.779	452.794	0.948566	27.7993	732.303	0.8991	19.7522	136.334	0.864402	36.7162	211.292	0.921483	21.2293	235.374	0.969759	9.78251	431.563
Arhgap27	0.991285	1.97364	250	0.99021	4.79501	237.095	1	0	0	0.983041	8.74195	252.08	0.957992	16.6689	457.26	0.985279	9.50706	764.963	0.987159	7.85114	855.77	0.987839	5.97399	531.126	0.980543	5.1187	93.1357	0.993142	2.85194	199.243	1	0	0	0.912595	16.8475	188.073	0.951679	12.9586	293.94	0.936799	16.9834	492.242	0.962199	12.2281	301.286
Arhgap28	1	0	0	0.989334	3.59626	386.142	0.991689	6.06421	1824.82	0.983041	8.74195	184.57	0.984247	6.25082	235.714	0.985279	9.50706	747.136	0.986247	6.28091	195.335	0.978849	11.948	312.895	0.961085	10.2374	314.224	0.96571	14.2597	243.347	0.979426	11.1197	521.671	0.935879	11.038	154.852	0.95792	11.5188	174.025	0.975137	8.49172	145.744	0.958418	13.451	519.008
Arhgap29	0.982569	3.94727	195.695	0.969082	11.9875	277.124	0.991689	6.06421	236.518	1	0	0	0.96594	18.7525	589.309	0.97532	19.0141	666.731	0.983764	9.42137	1235.19	1	0	0	0.970814	7.67805	342.14	0.993142	2.85194	176.149	0.98457	8.3398	1251.03	0.966488	7.55233	130.517	0.951679	12.9586	335.517	0.975137	8.49172	142.276	0.98866	3.66844	483.234
Arhgap31	0.834808	59.2091	288.002	0.840178	64.7326	613.824	0.93351	48.5137	852.226	1	0	0	0.973745	10.418	482.504	0.988959	7.13029	715.706	0.989685	4.71069	797.312	0.995136	2.38959	443.914	0.990271	2.55935	85.4409	1	0	0	0.989713	5.55986	993.188	0.982873	3.48569	103.326	0.98745	2.8797	195.119	1	0	0	1	0	0
Arhgap32	0.938993	13.8155	775.609	0.939069	25.1738	298.112	0.975066	18.1926	1174	0.983041	8.74195	989.12	0.989498	4.16721	131.146	0.945966	38.0282	607.695	0.969055	14.1321	559.502	0.976425	13.1428	535.418	0.980543	5.1187	102.63	0.972568	11.4077	274.156	0.963996	19.4595	978.139	0.953988	8.13328	98.3092	0.96235	9.35902	116.334	0.954856	10.6147	110.419	0.965979	11.0053	247.626
Arhgap35	0.973854	5.92091	399.14	0.975113	8.39126	608.597	1	0	0	1	0	0	0.973745	10.418	322.794	0.970557	19.0141	871.478	0.986247	6.28091	272.68	0.976425	13.1428	143.733	0.980543	5.1187	212.161	0.979426	8.55581	150.118	0.963996	19.4595	682.208	0.953988	8.13328	134.684	0.9498	11.5188	288.185	0.972914	6.36879	312.72	0.969759	9.78251	183.352
Arhgap39	0.862949	43.42	215.215	0.898448	41.9563	529.696	0.983377	12.1284	1165.73	0.983041	8.74195	1097.69	0.973745	10.418	305.248	0.985279	9.50706	984.725	0.982808	7.85114	186.998	0.975678	11.948	775.758	0.990271	2.55935	275.786	0.96571	14.2597	304.183	0.98457	8.3398	710.684	0.929685	12.7809	226.492	0.936112	14.3985	204.24	0.990971	2.12293	83.8785	0.965979	11.0053	411.825
Arhgap40	1	0	0	1	0	0	1	0	0	1	0	0	1	0	0	0.977918	14.2606	943.564	0.973523	14.1321	471.472	0.959433	21.5064	886.277	0.961085	10.2374	393.27	0.972568	11.4077	260.968	0.98457	8.3398	641.341	0.922518	12.1999	244.791	0.96646	8.6391	123.045	0.906233	21.2293	251.901	0.968037	13.451	180.823
Arhgap44	0.965139	7.89454	502.789	0.951352	17.9813	220.833	0.977113	24.2568	1579.17	0.983041	8.74195	600.24	0.984247	6.25082	827.38	0.974238	16.6374	744.788	0.983764	9.42137	523.812	0.981833	11.948	1097.77	0.961085	10.2374	167.908	0.967617	17.1116	379.683	0.974283	13.8997	321.626	0.975676	4.64759	136.48	0.985969	2.8797	106.696	1	0	0	0.98866	3.66844	210.673
Arhgap5	0.798661	53.2882	406.335	0.826931	70.7264	637.062	0.95252	42.4495	981.655	0.983041	8.74195	503.778	0.888511	62.5082	531.119	0.852824	116.461	846.346	0.88443	70.6603	602.561	0.877902	89.6098	668.715	0.848746	58.8651	436.684	0.803379	85.5581	693.483	0.853083	97.2976	871.603	0.683637	92.3708	192.829	0.700623	123.107	409.569	0.700895	137.99	468.072	0.840309	95.3795	520.451
Arhgap8	0.965139	7.89454	358.646	0.961995	14.385	942.543	0.958444	30.321	1030.13	0.983041	8.74195	1239.16	0.964787	16.6689	275.488	0.985279	9.50706	844.928	0.982808	7.85114	657.59	0.992703	3.58439	303.154	0.990271	2.55935	966.184	1	0	0	0.989713	5.55986	956.79	0.960101	6.39043	167.424	0.96646	8.6391	258.712	0.981942	4.24586	579.081	0.960742	12.2281	563.874
Arhgdia	0.714854	114.471	355.157	0.705091	167.825	675.56	0.916887	60.6421	796.872	0.949122	26.2258	648.284	0.79756	116.682	766.489	0.871978	95.0706	966.181	0.826213	114.627	681.106	0.865617	94.389	594.619	0.779683	112.611	560.493	0.856889	74.1503	675.227	0.864373	80.618	804.241	0.575005	158.018	303.957	0.659713	174.222	467.337	0.63933	199.555	549.259	0.731828	177.308	651.785
Arhgdib	1	0	0	1	0	0	1	0	0	0.983041	8.74195	1307.19	0.994749	2.08361	170.969	1	0	0	0.997087	3.14046	1672.24	0.98369	9.55838	814.346	0.980543	5.1187	368.31	1	0	0	1	0	0	0.945028	11.038	278.725	0.947669	12.9586	303.075	0.972914	6.36879	359.394	0.965979	11.0053	376.046
Arhgef1	0.982569	3.94727	89.5337	0.964448	11.9875	479.246	1	0	0	0.966081	17.4839	978.81	0.984247	6.25082	437.297	0.992639	4.75353	434.336	0.986247	6.28091	342.599	0.993302	4.77919	199.004	0.980543	5.1187	111.25	0.96571	14.2597	528.252	1	0	0	0.94063	9.29518	163.757	0.943525	12.9586	250.11	0.959622	8.49172	328.671	0.965979	11.0053	596.98
Arhgef11	0.965139	7.89454	135.758	0.983878	8.39126	464.679	1	0	0	0.983041	8.74195	230.362	0.978996	8.33443	274.979	0.982622	14.2606	507.323	0.990532	6.28091	157.156	0.995136	2.38959	269.688	0.980543	5.1187	101.641	0.972568	11.4077	266.584	0.994857	2.77993	396.825	0.978237	3.48569	149.291	0.98745	2.8797	94.8148	0.981942	4.24586	86.1733	0.99244	2.44563	646.016
Arhgef12	0.761703	69.0773	389.004	0.84694	68.3289	462.951	0.946091	54.5779	1334.52	0.932162	34.9678	337.82	0.928147	31.2541	357.623	0.898525	80.81	682.071	0.926489	37.6855	545.015	0.930528	41.8179	393.969	0.930526	30.7122	256.568	0.877252	65.5945	341.344	0.933135	36.1391	577.503	0.748445	64.4853	195.223	0.801283	54.7143	242.523	0.829467	55.1962	256.745	0.88706	50.1354	337.282
Arhgef16	0.950212	13.8155	115.132	0.933599	23.975	467.729	0.991689	6.06421	242.777	0.983041	8.74195	575.374	0.935991	33.3377	530.089	0.890041	95.0706	858.804	0.878732	67.5198	436.032	0.952851	26.2855	640.913	0.941628	15.3561	364.9	0.972568	11.4077	459.384	0.970617	19.4595	863.034	0.890056	22.076	249.733	0.917314	24.4774	275.045	0.905794	29.721	287.109	0.939518	20.7878	477.029
Arhgef18	0.973854	5.92091	190.864	0.975113	8.39126	155.833	0.991689	6.06421	1406.47	0.983041	8.74195	988.142	0.978996	8.33443	354.915	0.955836	28.5212	777.535	0.97937	9.42137	422.794	0.995136	2.38959	805.264	0.980543	5.1187	121.222	0.986284	5.70387	649.798	0.974283	13.8997	675.456	0.94922	8.13328	122.419	0.9749	5.7594	133.806	0.945827	14.8605	202.75	0.981099	6.11407	186.425
Arhgef26	0.950212	13.8155	540.398	0.96554	13.1863	698.191	0.975066	18.1926	1275.4	0.966081	17.4839	609.741	0.994749	2.08361	69.3529	0.976747	23.7676	620.958	0.973523	14.1321	624.111	0.985407	7.16878	683.447	0.980543	5.1187	378.95	0.960822	19.9636	431.061	0.989713	5.55986	664.047	0.960101	6.39043	113.323	0.963331	9.35902	328.295	0.957367	12.7376	262.54	0.985882	6.11407	212.367
Arhgef28	0.921562	17.7627	422.458	0.894028	41.9563	491.088	0.916887	60.6421	941.711	0.939445	52.4517	563.472	0.878692	56.2574	825.691	0.938615	42.7818	632.701	0.918603	39.2557	798.416	0.927815	48.9867	697.12	0.877067	51.187	550.697	0.911035	51.3348	445.579	0.896717	83.398	1229.89	0.797938	48.2187	166.047	0.83278	55.4342	302.771	0.837577	65.8108	332.043	0.88675	56.2494	620.681
Arhgef3	1	0	0	0.996445	1.19875	219.877	1	0	0	1	0	0	1	0	0	1	0	0	0.996562	1.57023	694.444	0.997568	1.1948	139.101	0.990271	2.55935	117.841	1	0	0	0.989713	5.55986	160.908	0.942961	12.7809	234.907	0.916318	20.8778	196.783	0.948421	14.8605	229.528	0.973539	9.78251	177.21
Arhgef33	0.982569	3.94727	129.386	0.975113	8.39126	113.889	0.983377	12.1284	1439.11	1	0	0	0.984247	6.25082	647.261	0.992639	4.75353	1454.67	0.972493	12.5618	354.983	0.982975	8.36358	907.123	0.941628	15.3561	92.0482	1	0	0	1	0	0	0.963728	5.80948	253.931	0.990587	2.15977	304.572	1	0	0	0.99622	1.22281	142.167
Arhgef40	0.891771	29.6045	335.647	0.897565	40.7576	607.68	0.90688	90.9631	1102.48	0.903114	61.1936	773.544	0.81604	91.6787	494.719	0.959516	26.1444	534.909	0.963244	18.8427	903.493	0.990271	4.77919	280.784	1	0	0	0.993142	2.85194	176.149	0.994857	2.77993	119.374	0.996373	0.580948	123.442	0.996862	0.719925	431.22	1	0	0	0.99622	1.22281	259.403
Arhgef5	0.904132	21.71	463.189	0.910789	34.7638	410.694	0.941821	42.4495	587.967	1	0	0	0.922568	43.7557	427.208	0.9159	66.5494	917.849	0.929917	36.1153	755.784	0.972211	16.7272	426.623	0.931899	17.9155	236.067	0.96571	14.2597	761.656	0.958852	22.2395	678.145	0.796693	47.6378	163.469	0.834368	57.594	276.684	0.865122	44.5815	265.81	0.923441	35.4616	518.247
Arhgef7	0.982569	3.94727	188.995	0.969939	13.1863	498.757	1	0	0	1	0	0	0.973745	10.418	319.379	0.977918	14.2606	786.663	0.97937	9.42137	820.254	0.98369	9.55838	257.681	0.951357	12.7968	104.59	0.951994	19.9636	503.384	0.979426	11.1197	817.955	0.906883	16.2666	178.391	0.90691	23.0376	234.572	0.901776	21.2293	233.942	0.965075	15.8966	201.628
Arid1a	0.872043	31.5782	251.82	0.861638	64.7326	418.818	0.960755	36.3852	462.49	0.983041	8.74195	187.196	0.89297	47.923	434	0.882787	99.8241	930.457	0.931503	48.6771	604.698	0.944422	33.4543	376.023	0.944422	17.9155	200.392	0.859819	79.8542	587.889	0.927992	38.9191	450.645	0.792783	56.352	179.378	0.865568	51.8346	202.53	0.863566	57.3191	295.983	0.923952	30.5703	201.826
Arid1b	0.938993	13.8155	120.285	0.893031	46.7513	526.481	0.927723	60.6421	751.02	0.949122	26.2258	270.796	0.901945	52.0902	270.116	0.926844	59.4191	510.689	0.956383	21.9832	311.115	0.961862	20.3116	510.382	0.925083	23.0342	525.358	0.94719	25.6674	398.069	0.955271	27.7993	240.399	0.911596	15.6856	95.9327	0.897111	27.3571	325.469	0.942035	12.7376	131.315	0.964502	11.0053	251.046
Arid2	0.950212	13.8155	170.059	0.944252	20.3788	686.123	0.927723	60.6421	764.122	0.983041	8.74195	230.362	0.940004	29.1705	507.704	0.935989	47.5353	596.123	0.945247	32.9748	272.478	0.954062	28.6751	544.228	0.931899	17.9155	233.85	0.945137	22.8155	224.137	0.966638	25.0194	657.644	0.908984	17.4285	134.06	0.931416	19.438	315.755	0.915213	19.1064	469.396	0.979754	11.0053	199.426
Arid3b	1	0	0	0.99289	2.3975	207.058	1	0	0	1	0	0	0.994749	2.08361	99.7307	0.981598	11.8838	487.823	0.993123	3.14046	1177.96	0.990917	5.97399	1489.9	0.990271	2.55935	85.4409	0.986284	5.70387	987.355	0.979426	11.1197	940.503	0.960101	6.39043	102.659	0.947669	12.9586	244.049	0.92777	16.9834	187.252	0.984879	4.89126	99.8011
Arid4a	0.869805	39.4727	278.507	0.863113	53.9438	464.149	0.96896	30.321	696.036	0.949122	26.2258	278.911	0.903902	56.2574	314.08	0.92023	54.6656	545.865	0.931654	39.2557	423.137	0.908775	52.5711	683.265	0.898491	33.2716	528.829	0.929909	39.9271	563.871	0.922048	52.8187	841.863	0.807741	50.5425	197.988	0.813764	59.7538	451.123	0.809905	67.9338	332.635	0.921606	40.3529	527.249
Arid4b	0.800846	55.2618	272.308	0.809217	89.9064	460.696	0.966755	24.2568	587.566	0.932162	34.9678	847.076	0.816698	139.602	638.737	0.87471	102.201	715.177	0.906451	65.9496	599.162	0.849875	97.9734	767.35	0.839259	61.4244	343.669	0.808825	128.337	889.415	0.878565	83.398	667.804	0.679698	87.1423	242.803	0.734208	110.148	338.274	0.792675	91.286	337.064	0.862374	78.2601	457.9
Arid5a	0.932887	17.7627	230.238	0.946671	17.9813	540.812	1	0	0	0.983041	8.74195	852.515	0.882496	52.0902	642.417	0.952155	30.8979	384.791	0.905903	47.1069	563.887	0.974623	15.5324	748.805	0.941628	15.3561	231.69	0.96571	14.2597	780.223	0.98457	8.3398	1286.25	0.838869	36.5998	216.818	0.864272	44.6353	459.169	0.882873	42.4586	533.787	0.948576	25.6791	496.397
Arid5b	0.852617	43.42	616.776	0.855944	62.3351	587.866	0.93351	48.5137	922.531	0.923096	61.1936	894.751	0.850009	72.9262	875.152	0.906627	66.5494	1180.7	0.822901	106.776	993.468	0.871989	96.7786	838.465	0.68801	120.29	595.984	0.812488	99.8178	568.814	0.831748	138.997	1044.81	0.731546	77.8471	270.403	0.761318	89.9906	482.26	0.802619	70.0567	694.78	0.837138	77.0373	616.455
Arih1	0.862949	43.42	267.222	0.829397	74.3226	458.117	0.977113	24.2568	794.556	0.983041	8.74195	1727.12	0.858673	91.6787	425.297	0.857456	130.722	688.861	0.864813	81.6519	608.843	0.921062	63.3243	705.287	0.891	38.3903	482.028	0.862289	85.5581	501.494	0.934754	38.9191	619.756	0.733033	69.7138	214.887	0.815527	66.2331	248.615	0.834767	61.565	516.676	0.900379	42.7985	341.052
Arih2	0.883112	31.5782	180.899	0.937785	29.9688	211.602	0.975066	18.1926	393.324	1	0	0	0.926485	29.1705	553.429	0.925959	57.0424	575.426	0.950466	26.6939	201.703	0.959433	21.5064	314.478	0.925083	23.0342	413.012	0.958852	17.1116	743.447	0.966638	25.0194	391.04	0.774715	50.5425	201.233	0.853208	45.3553	313.137	0.876455	33.9669	256.368	0.929412	30.5703	299.619
Arl1	0.757559	65.13	413.156	0.76953	94.7014	582.521	0.816904	194.055	876.433	0.662145	271	839.187	0.712053	156.271	772.033	0.772784	209.155	925.874	0.780623	150.742	988.56	0.849363	96.7786	614.925	0.73987	97.2554	679.639	0.665617	182.524	539.899	0.801709	155.676	972.645	0.565642	194.037	342.784	0.579327	250.534	561.456	0.641547	208.047	447.378	0.709014	226.221	707.993
Arl13b	0.932887	17.7627	280.24	0.916897	31.1675	524.55	0.983377	12.1284	692.42	0.966081	17.4839	325.773	0.896772	54.1738	636.143	0.903983	71.3029	554.743	0.926489	37.6855	660.155	0.92589	51.3763	594.93	0.898491	33.2716	311.066	0.94719	25.6674	788.646	0.950146	30.5793	1129.62	0.874511	26.7236	203.026	0.888562	30.2368	406.149	0.901776	21.2293	206.329	0.948275	18.3422	321.076
Arl14ep	0.982569	3.94727	97.6913	0.975113	8.39126	415.654	1	0	0	0.983041	8.74195	1307.19	0.989498	4.16721	1477.21	0.985279	9.50706	928.329	0.989685	4.71069	653.444	0.985407	7.16878	191.502	0.97321	10.2374	372.051	1	0	0	0.994857	2.77993	399.042	0.956474	6.97138	89.8107	0.96235	8.6391	230.381	0.981942	4.24586	107.406	0.969759	9.78251	522.817
Arl15	0.938993	13.8155	185.963	0.971558	9.59001	472.45	1	0	0	1	0	0	0.994749	2.08361	107.25	0.985279	9.50706	367.952	0.956383	21.9832	382.965	0.992703	3.58439	665.504	0.965263	15.3561	147.67	0.99419	5.70387	246.488	0.994857	2.77993	185.494	0.97461	4.06664	86.9865	0.952937	10.7989	203.802	0.972914	6.36879	633.348	0.98866	3.66844	216.61
Arl16	0.944936	19.7364	267.25	0.954901	16.7825	678.474	0.991689	6.06421	976.562	1	0	0	0.963243	14.5852	317.55	0.968881	26.1444	927.17	0.970927	17.2725	800.619	0.979907	14.3376	1457.78	0.963667	12.7968	245.719	0.979426	8.55581	292.176	0.98457	8.3398	270.398	0.829736	32.5331	178.557	0.903773	23.0376	202.761	0.907723	29.721	303.969	0.944501	19.565	579.82
Arl2	0.821853	55.2618	335.601	0.869255	63.5338	602.957	0.958444	30.321	667.915	1	0	0	0.833029	77.0935	728.197	0.948642	45.1585	712.067	0.878062	84.7923	535.336	0.924418	47.7919	712.028	0.876588	35.8309	430.676	0.951994	19.9636	302.456	0.945017	33.3592	925.148	0.603548	127.228	301.811	0.72987	101.509	423.334	0.675167	112.515	327.775	0.756237	141.846	680.759
Arl2bp	0.938993	13.8155	120.305	0.964448	11.9875	442.627	0.966755	24.2568	1539.16	1	0	0	0.952741	18.7525	379.492	0.967994	23.7676	557.289	0.906872	48.6771	891.124	0.935352	39.4283	400.29	0.879187	38.3903	369.883	0.958852	17.1116	703.043	0.92962	41.699	579.808	0.715077	77.2661	285.849	0.817433	59.7538	293.432	0.852216	36.0898	366.9	0.891622	37.9072	255.812
Arl3	0.909065	25.6573	165.291	0.911245	41.9563	549.09	0.966755	24.2568	826.284	0.953298	34.9678	666.365	0.885205	68.759	383.492	0.954296	35.6515	925.265	0.932407	40.8259	1143.76	0.952144	25.0907	648.945	0.951357	12.7968	146.409	0.972568	11.4077	1210.02	0.963996	19.4595	962.104	0.829523	27.3046	217.494	0.88705	26.6372	332.192	0.870237	29.721	508.131	0.919182	30.5703	517.152
Arl4a	0.982569	3.94727	173.581	0.928476	28.77	565.998	0.92151	72.7705	1246.16	0.949122	26.2258	516.26	0.916286	58.341	335.996	0.898525	80.81	1049.99	0.902502	78.5114	940.454	0.923507	52.5711	788.766	0.875535	48.6277	384.455	0.928444	37.0752	846.529	0.946333	36.1391	693.858	0.848151	33.695	267.373	0.801433	61.9135	512.596	0.76001	74.3026	326.462	0.907868	34.2388	530.409
Arl4c	0.751215	114.471	579.325	0.738405	165.428	737.514	0.82656	157.669	953.421	0.755438	201.065	671.648	0.659324	335.461	935.03	0.852193	142.606	862.082	0.845518	144.461	722.168	0.854267	109.921	806.24	0.842348	66.5431	536.96	0.774821	122.633	643.003	0.870599	94.5177	897.133	0.808819	39.5045	148.293	0.856534	54.7143	255.035	0.784722	65.8108	278.4	0.902622	46.4669	538.367
Arl4d	0.950212	13.8155	271.937	0.919389	28.77	531.24	0.946091	54.5779	837.526	0.82185	183.581	818.962	0.90047	62.5082	598.051	0.886636	85.5635	837.129	0.876912	81.6519	767.458	0.907404	80.0514	879.939	0.940825	30.7122	262.336	0.823337	105.522	650.893	0.859248	136.217	1005.43	0.72961	79.5899	331.837	0.700736	130.306	489.614	0.726236	133.745	500.33	0.765045	144.292	567.281
Arl5a	1	0	0	0.971558	9.59001	191.173	0.991689	6.06421	875.657	0.949122	26.2258	406.661	0.968494	12.5016	743.166	0.959516	26.1444	422.003	0.955301	20.413	410.756	0.965546	21.5064	425.598	0.892839	40.9496	134.55	0.96571	14.2597	546.023	0.950146	30.5793	688.707	0.707455	73.1995	166.045	0.80358	56.8741	261.435	0.823831	74.3026	430.139	0.896548	50.1354	410.621
Arl5b	0.88144	41.4464	408.215	0.857218	71.9251	534.772	0.905039	84.8989	610.832	0.915203	43.7097	508.532	0.88432	66.6754	387.395	0.86562	102.201	710.563	0.911188	48.6771	535.289	0.915714	62.1295	488.288	0.900569	35.8309	574.88	0.832808	91.262	513.748	0.933135	36.1391	686.009	0.907182	18.5904	179.583	0.839425	46.0752	306.194	0.909712	23.3522	231.935	0.962199	12.2281	147.901
Arl6	0.895481	33.5518	268.004	0.918759	33.5651	324.951	0.983377	12.1284	1471.22	1	0	0	0.973745	10.418	193.864	1	0	0	0.986247	6.28091	380.842	0.992703	3.58439	163.309	0.970814	7.67805	1017.2	0.986284	5.70387	251.128	0.989713	5.55986	1300.48	0.824626	38.3426	185.52	0.865842	35.2763	231.002	0.866247	29.721	291.503	0.892213	51.3582	541.519
Arl6ip1	0.689932	120.392	517.89	0.74898	177.415	731.676	0.735721	224.376	862.36	0.823045	113.645	441.689	0.799027	156.271	707.984	0.638037	456.339	1214.17	0.716483	323.467	1169.42	0.741012	221.038	962.08	0.516899	381.343	780.581	0.620456	265.23	788.527	0.68083	325.252	1136.26	0.544204	181.837	440.416	0.533606	259.893	655.274	0.513333	295.087	680.975	0.65728	283.693	768.045
Arl6ip4	0.811468	55.2618	201.791	0.893779	47.9501	508.838	0.950132	36.3852	1235.4	0.949122	26.2258	653.457	0.872018	56.2574	589.893	0.939654	45.1585	873.755	0.885763	73.8007	566.897	0.904374	62.1295	459.533	0.865248	71.6618	277.637	0.928444	37.0752	477.652	0.950146	30.5793	427.683	0.700154	78.428	343.933	0.812491	67.6729	250.37	0.808303	65.8108	337.461	0.87961	51.3582	691.746
Arl6ip5	0.874446	33.5518	331.304	0.906305	40.7576	379.629	0.96896	30.321	815.61	0.919919	52.4517	656.782	0.906013	47.923	740.539	0.82781	147.359	762.542	0.875233	100.495	745.283	0.933439	35.8439	1040.72	0.892839	40.9496	474.329	0.801854	111.226	658.806	0.872255	83.398	621.009	0.617101	118.513	279.823	0.676686	135.346	500.681	0.747317	114.638	651.198	0.78952	122.281	497.142
Arl6ip6	0.910927	27.6309	198.823	0.944092	26.3725	287.165	0.925199	54.5779	1024.67	0.915203	43.7097	497.02	0.880939	50.0066	588.938	0.863774	109.331	867.427	0.895849	69.0901	630.14	0.905954	47.7919	558.038	0.894421	43.509	357.688	0.862842	57.0387	699.193	0.888518	63.9384	846.468	0.734434	67.39	205.884	0.780381	71.9925	311.396	0.770973	74.3026	428.547	0.83099	68.4776	456.613
Arl8a	0.982569	3.94727	113.426	0.967152	15.5838	436.535	0.983377	12.1284	1530.69	0.932162	34.9678	486.043	0.981251	12.5016	276.747	0.963196	23.7676	763.377	0.963244	18.8427	778.764	0.963517	17.922	539.374	0.970814	7.67805	293.949	0.951994	19.9636	266.725	0.969139	16.6796	391.737	0.906311	18.5904	138.587	0.93725	14.3985	261.926	0.933124	14.8605	628.258	0.954639	14.6738	167.703
Arl8b	0.837256	49.3409	320.051	0.835088	76.7201	456.585	0.851239	139.477	945.001	0.809986	131.129	475.932	0.835632	81.2607	639.604	0.858147	118.838	566.565	0.874973	76.9412	493.961	0.8781	82.441	512.345	0.845079	53.7464	342.479	0.764932	119.781	652.653	0.807081	122.317	854.687	0.648259	101.666	262.402	0.705106	118.788	399.32	0.724766	108.269	320.179	0.836472	77.0373	352.728
Armc1	0.880745	29.6045	236.858	0.93554	26.3725	416.726	0.966755	24.2568	626.415	0.966081	17.4839	307.089	0.933389	29.1705	342.048	0.941394	49.9121	921.476	0.910791	56.5282	570.114	0.964291	19.1168	370.911	0.954062	15.3561	176.508	0.938279	25.6674	296.416	0.965508	22.2395	762.498	0.816225	36.0188	150.837	0.831528	50.3947	281.214	0.860946	40.3357	200.218	0.891086	41.5757	518.489
Armc10	0.956424	9.86818	243.998	0.971558	9.59001	369.982	0.975066	18.1926	981.46	0.932162	34.9678	572.39	0.952741	18.7525	403.906	0.953314	33.2747	905.5	0.957302	23.5534	514.133	0.974623	15.5324	954.049	0.970814	7.67805	602.727	0.972568	11.4077	613.662	0.98457	8.3398	825.965	0.8991	19.1713	167.461	0.926708	16.5583	255.125	0.909712	21.2293	407.762	0.941782	22.0106	270.891
Armc5	0.965139	7.89454	423.472	0.953782	15.5838	356.509	0.991689	6.06421	264.831	0.983041	8.74195	423.549	0.968494	12.5016	311.518	0.960657	28.5212	545.39	0.982808	7.85114	532.518	0.980543	9.55838	235.957	0.951357	12.7968	133.17	0.96571	14.2597	847.718	0.989713	5.55986	269.013	0.963728	5.80948	83.2893	0.965487	7.91917	232.318	0.957367	12.7376	127.98	0.984879	4.89126	398.744
Armc6	1	0	0	0.98042	9.59001	196.59	0.975066	18.1926	1500.66	0.983041	8.74195	340.02	0.978996	8.33443	164.123	0.992639	4.75353	242.399	0.993123	3.14046	928.531	0.995136	2.38959	71.2252	0.980543	5.1187	394.115	0.993142	2.85194	572.082	0.989713	5.55986	722.513	0.960101	6.39043	94.3302	0.950803	12.2387	201.162	0.963885	8.49172	149.365	0.977319	7.33688	118.21
Armc7	0.973854	5.92091	166.374	0.982224	5.99376	534.567	1	0	0	0.983041	8.74195	413.907	0.994749	2.08361	1132.5	0.99632	2.37676	238.949	1	0	0	0.995136	2.38959	902.236	0.980543	5.1187	427.082	1	0	0	0.989713	5.55986	728.942	0.960101	6.39043	86.794	0.968625	7.19925	233.438	0.990971	2.12293	97.4849	0.973539	8.5597	456.63
Armc8	0.965139	7.89454	108.475	0.971558	9.59001	409.71	0.991689	6.06421	700.28	0.983041	8.74195	503.778	0.957992	16.6689	560.847	0.966877	21.3909	589.798	0.97937	9.42137	520.377	0.976425	13.1428	784.675	0.980543	5.1187	403.518	0.993142	2.85194	550.358	0.989713	5.55986	402.014	0.905371	17.4285	133.343	0.935131	16.5583	285.366	0.933124	14.8605	438.881	0.933175	23.2335	682.195
Armcx1	0.727492	88.8136	350.776	0.770852	118.676	616.009	0.916887	60.6421	1019.85	0.983041	8.74195	252.08	0.968494	12.5016	270.125	0.99632	2.37676	458.926	0.976943	12.5618	739.07	0.992703	3.58439	1657.74	1	0	0	0.993142	2.85194	138.447	1	0	0	1	0	0	0.996862	0.719925	576.369	1	0	0	1	0	0
Armcx2	0.712718	110.524	567.425	0.854947	97.0989	551.646	0.900327	103.092	874.52	0.983041	8.74195	184.57	0.949365	37.5049	429.873	1	0	0	1	0	0	1	0	0	1	0	0	1	0	0	1	0	0	1	0	0	1	0	0	0.981942	4.24586	1347.73	1	0	0
Armcx3	0.564348	232.889	450.037	0.677833	224.167	698.3	0.882265	109.156	803.19	0.881284	61.1936	800.011	0.930807	35.4213	498.636	1	0	0	0.996562	1.57023	1663.89	0.997568	1.1948	648.088	1	0	0	1	0	0	0.994857	2.77993	391.543	0.982873	3.48569	116.014	0.98745	2.8797	457.487	0.990971	2.12293	1003.01	0.981099	6.11407	776.706
Armcx5	0.967451	9.86818	372.618	0.957337	14.385	710.53	1	0	0	0.983041	8.74195	397.456	0.984247	6.25082	990.722	0.985279	9.50706	469.931	0.983764	9.42137	778.671	0.987839	5.97399	793.922	0.951357	12.7968	610.246	0.986284	5.70387	1022.06	0.994857	2.77993	395.101	0.950059	11.619	125.357	0.940387	13.6786	484.758	0.959058	14.8605	330.155	0.958418	13.451	652.099
Armcx6	0.672511	108.55	363.38	0.709254	149.844	592.908	0.868449	175.862	901.26	0.983041	8.74195	372.301	0.954335	20.8361	247.633	1	0	0	0.996562	1.57023	2336.45	1	0	0	1	0	0	1	0	0	1	0	0	1	0	0	1	0	0	1	0	0	1	0	0
Arnt	0.973854	5.92091	126.889	0.961995	14.385	344.752	1	0	0	1	0	0	0.984247	6.25082	157.744	0.977918	14.2606	699.937	0.972493	12.5618	288.617	0.976425	13.1428	554.179	0.941628	15.3561	253.832	0.956671	28.5194	655.973	0.975713	16.6796	383.083	0.890056	22.076	208.984	0.904898	27.3571	225.816	0.948421	14.8605	115.069	0.977319	8.5597	141.247
Arnt2	0.941556	15.7891	168.763	0.954901	16.7825	153.617	0.975066	18.1926	443.708	1	0	0	0.970002	14.5852	495.665	0.956986	30.8979	573.808	0.951293	28.2641	407.124	0.985407	7.16878	249.508	0.990271	2.55935	154.036	0.993142	2.85194	200.884	1	0	0	1	0	0	1	0	0	1	0	0	1	0	0
Arntl	0.991285	1.97364	106.963	0.97969	8.39126	220.021	1	0	0	0.966081	17.4839	849.383	0.989498	4.16721	290.97	0.966877	21.3909	712.864	0.97937	9.42137	311.283	0.987839	5.97399	367.512	0.970814	7.67805	92.12	0.958852	17.1116	739.784	0.98457	8.3398	725.931	0.963728	5.80948	139.016	0.958657	12.2387	490.76	0.972914	6.36879	387.701	0.99622	1.22281	207.727
Arpc1a	0.820487	67.1036	379.614	0.787461	103.093	564.437	0.911154	72.7705	908.891	0.983041	8.74195	184.57	0.795222	100.013	682.083	0.759795	240.053	987.514	0.806863	149.172	931.948	0.816646	146.96	774.389	0.706964	115.171	462.549	0.745629	165.412	695.673	0.795843	175.136	904.376	0.410326	365.417	550.208	0.599589	236.135	560.543	0.615153	244.137	557.096	0.662957	242.117	626.317
Arpc1b	0.652555	157.891	448.278	0.720007	206.185	644.37	0.975066	18.1926	942.588	0.932162	34.9678	774.116	0.889728	43.7557	732.686	0.816261	140.229	923.211	0.839983	135.04	1000.92	0.909148	47.7919	669.365	0.783521	97.2554	441.802	0.894478	68.4465	913.365	0.88128	111.197	1064.67	0.494089	341.598	576.281	0.578692	258.453	612.683	0.641938	220.785	436.891	0.683166	244.563	758.716
Arpc2	0.779536	252.625	528.512	0.743873	344.042	842.447	0.96896	30.321	1123.64	0.932162	34.9678	310.181	0.789412	141.685	761.326	0.841865	123.592	703.989	0.803995	183.717	966.755	0.860857	96.7786	974.728	0.708294	138.205	506.122	0.832808	91.262	673.196	0.892552	88.9578	832.989	0.458644	331.722	671.891	0.591893	326.126	705.716	0.539356	341.792	648.131	0.640357	313.04	879.262
Arpc3	0.773577	193.416	461.019	0.861725	182.21	798.852	0.972805	66.7063	525.872	0.925331	69.9356	436.606	0.881303	120.849	954.04	0.89004	95.0706	1052.77	0.845808	146.031	1183.69	0.838614	151.739	1070.29	0.763142	158.68	611.34	0.866552	77.0023	903.039	0.880709	88.9578	1248.84	0.526616	292.798	726.67	0.570843	326.126	730.438	0.479982	430.955	858.315	0.570057	476.897	1112.17
Arpc4	0.792196	57.2354	441.951	0.814113	83.9126	378.15	0.886273	90.9631	856.689	0.823045	113.645	504.828	0.813153	97.9295	577.671	0.822071	121.215	1082.13	0.834623	116.197	742.225	0.87367	78.8566	690.962	0.774364	81.8992	431.886	0.880723	57.0387	825.876	0.892667	72.2782	730.063	0.562811	140.59	264.982	0.638903	153.344	442.711	0.667732	131.622	564.243	0.692822	178.531	602.323
Arpc5	0.798896	100.655	395.464	0.727541	146.248	537.765	0.91944	66.7063	1396.69	0.983041	8.74195	230.362	0.819388	97.9295	702.262	0.866544	104.578	838.611	0.804987	142.891	867.972	0.879444	86.0254	677.617	0.760682	79.3399	464.428	0.839697	74.1503	643.085	0.849188	102.857	1064.76	0.56767	177.189	379.746	0.643182	155.504	465.795	0.578325	205.924	485.923	0.719179	151.629	656.549
Arpc5l	0.639228	197.364	520.948	0.733498	161.832	875.568	0.905039	84.8989	1022.61	0.915203	43.7097	544.389	0.830427	83.3443	922.306	0.824272	125.969	793.658	0.780442	161.734	752.445	0.853243	99.1682	822.98	0.776603	104.933	342.287	0.856889	74.1503	697.547	0.876634	94.5177	586.571	0.436809	269.56	526.92	0.533098	257.733	554.601	0.540834	297.21	594.315	0.630956	245.786	812.376
Arpp19	0.792701	108.55	398.824	0.823313	147.446	786.13	0.885565	121.284	1346.15	0.903114	61.1936	740.043	0.768955	189.608	578.108	0.858847	97.4474	1019.02	0.785928	182.147	1275.67	0.831322	132.623	1015.61	0.719144	171.477	674.099	0.909633	48.4829	710.862	0.891411	69.4983	910.206	0.489822	300.35	723.553	0.630914	264.212	744.282	0.649819	248.383	766.053	0.665644	289.807	1008.26
Arrb2	0.891771	29.6045	252.716	0.915836	29.9688	377.618	0.983377	12.1284	1392.58	1	0	0	1	0	0	0.988959	7.13029	230.877	0.996562	1.57023	85.2152	1	0	0	0.980543	5.1187	181.532	0.993142	2.85194	138.447	0.985836	11.1197	570.795	0.97461	4.06664	129.546	1	0	0	1	0	0	0.99244	2.44563	90.3301
Arrdc1	0.895417	23.6836	287.845	0.924942	29.9688	566.263	0.975066	18.1926	1512.63	0.953298	34.9678	344.299	0.915983	33.3377	535.718	0.934938	45.1585	524.731	0.953885	25.1237	475.538	0.95107	28.6751	422.71	0.961085	10.2374	642.194	0.951994	19.9636	359.232	0.979426	11.1197	772.62	0.897237	21.4951	254.854	0.911894	23.7575	614.268	0.909712	21.2293	289.239	0.940556	28.1247	236.627
Arrdc2	0.802855	57.2354	422.704	0.809986	99.4964	624.463	0.935998	54.5779	578.309	0.983041	8.74195	1201.92	0.876661	77.0935	491.626	0.908593	71.3029	915.758	0.933345	34.545	617.23	0.949788	32.2595	673.92	0.892839	40.9496	380.271	0.935235	34.2232	583.945	0.943422	30.5793	532.098	0.902706	19.1713	239.75	0.914134	30.2368	462.885	0.959058	14.8605	144.421	0.947078	18.3422	675.888
Arrdc3	0.885805	49.3409	360.501	0.881403	43.1551	529.148	0.966755	24.2568	717.225	0.966081	17.4839	1462.78	0.844154	85.4279	534.394	0.916748	68.9262	655.653	0.893699	103.635	571.989	0.90074	75.2722	701.498	0.816248	61.4244	432.503	0.945334	39.9271	416.852	0.893658	61.1585	933.144	0.80602	41.2473	198.01	0.810683	59.7538	400.293	0.82431	59.4421	504.002	0.907843	40.3529	274.743
Arrdc4	0.874446	33.5518	512.694	0.9055	39.5588	510.374	0.966755	24.2568	918.83	0.949122	26.2258	658.36	0.929574	33.3377	327.845	0.906627	66.5494	811.22	0.893087	72.2305	552.443	0.819534	182.804	898.291	0.597406	220.104	670.052	0.780105	116.929	661.621	0.826756	141.777	777.281	0.598442	166.732	389.39	0.714864	125.267	339.397	0.785985	95.5319	295.052	0.819415	77.0373	469.648
Arsa	1	0	0	0.983212	7.19251	144.594	0.991689	6.06421	203.128	0.983041	8.74195	593.472	0.989498	4.16721	561.637	0.988959	7.13029	596.528	0.989685	4.71069	104.38	0.975678	11.948	593.852	0.980543	5.1187	422.045	0.938279	25.6674	313.995	0.980791	13.8997	686.933	0.888917	29.0474	146.032	0.935226	19.438	193.035	0.934207	23.3522	365.182	0.947078	17.1194	327.256
Arsb	0.973854	5.92091	517.694	0.97969	8.39126	495.916	0.991689	6.06421	889.68	1	0	0	1	0	0	0.988959	7.13029	499.387	0.993123	3.14046	281.021	0.997568	1.1948	106.86	0.990271	2.55935	116.212	0.993142	2.85194	220.848	0.989713	5.55986	107.85	0.944137	10.4571	274.791	0.943525	12.9586	165.801	0.981942	4.24586	80.9219	0.973539	8.5597	568.184
Arsk	0.912847	19.7364	286.183	0.949637	21.5775	404.186	0.985162	18.1926	394.061	0.966081	17.4839	1176.55	0.973745	10.418	605.001	0.960657	28.5212	1212.87	0.969055	14.1321	963.786	0.969797	17.922	633.078	0.970814	7.67805	228.034	0.938279	25.6674	535.984	0.953709	25.0194	648.995	0.940526	11.038	167.398	0.916318	20.1579	194.02	0.936799	16.9834	249.933	0.931958	22.0106	516.99
Arv1	0.982569	3.94727	206.37	0.989334	3.59626	344.876	0.991689	6.06421	173.913	1	0	0	0.994749	2.08361	131.027	0.981598	11.8838	496.903	0.989685	4.71069	897.043	0.985407	7.16878	447.462	0.961085	10.2374	94.6167	0.972568	11.4077	702.648	1	0	0	0.960101	6.39043	196.395	0.988282	3.59962	781.957	0.954856	12.7376	178.026	0.977319	7.33688	204.949
Arvcf	0.991285	1.97364	2392.34	0.975113	8.39126	195.14	0.958444	30.321	633.974	0.932162	34.9678	371.124	0.921556	41.6721	385.82	0.922713	49.9121	854.758	0.937075	42.3962	437.076	0.946492	26.2855	557.068	0.970814	7.67805	301.271	0.90616	42.779	611.096	0.970617	19.4595	416.733	0.892381	18.0094	114.336	0.935131	16.5583	311.238	0.916581	29.721	158.024	0.941782	22.0106	478.965
Arxes1	1	0	0	0.978669	7.19251	235.983	0.975066	18.1926	313.99	0.966081	17.4839	934.022	1	0	0	0.982622	14.2606	931.978	0.983764	9.42137	358.385	0.970814	14.3376	594.31	0.980543	5.1187	788.07	0.945137	22.8155	273.031	0.989713	5.55986	1335.11	0.996373	0.580948	437.445	0.990587	2.15977	162.843	0.975312	4.24586	69.5378	0.996927	3.66844	623.182
Arxes2	0.956424	9.86818	641.803	0.983212	7.19251	224.357	0.96896	30.321	505.164	0.971262	34.9678	422.762	0.943867	25.0033	554.579	0.87294	97.4474	908.02	0.924253	50.2473	917.618	0.849396	103.947	672.693	0.751046	81.8992	480.515	0.697437	293.749	586.625	0.837728	164.016	704.286	0.926069	13.3618	226.755	0.933761	17.9981	387.029	0.968061	6.36879	98.7557	0.969759	9.78251	469.497
Asah1	0.768343	65.13	445.557	0.844873	71.9251	407.882	0.813761	181.926	867.201	0.903114	61.1936	398.91	0.904794	45.8393	665.515	0.89937	83.1868	760.987	0.904352	51.8175	760.286	0.908775	52.5711	533.325	0.859847	43.509	658.937	0.848394	74.1503	531.757	0.884904	69.4983	842.609	0.818898	40.6664	199.415	0.804999	58.3139	344.73	0.860947	42.4586	298.558	0.858035	59.9179	474.042
Asah2	1	0	0	0.99289	2.3975	589.23	1	0	0	1	0	0	0.989498	4.16721	979.551	0.992639	4.75353	1417.61	0.989685	4.71069	883.761	0.992703	3.58439	296.86	0.980543	5.1187	650.898	0.974388	14.2597	711.833	0.985836	11.1197	497.109	0.964843	6.39043	102.303	0.988282	3.59962	243.549	0.963885	8.49172	310.875	0.98866	3.66844	259.673
Asap1	0.965139	7.89454	258.739	0.954901	16.7825	414.551	1	0	0	1	0	0	0.970002	14.5852	339.576	0.99632	2.37676	231.696	0.986247	6.28091	252.238	0.995136	2.38959	1258.23	0.991757	5.1187	174.186	0.993142	2.85194	1564.95	1	0	0	0.985491	2.32379	94.7944	0.990587	2.15977	147.397	1	0	0	0.99244	2.44563	2133.98
Asap2	0.811468	55.2618	345.263	0.889518	47.9501	498.943	0.958444	30.321	972.011	0.949122	26.2258	280.101	0.970002	14.5852	319.961	0.988959	7.13029	633.845	0.97937	9.42137	685.218	0.986106	8.36358	1310.75	0.980543	5.1187	517.546	0.979426	8.55581	772.517	0.979426	11.1197	238.711	0.946746	9.29518	127.107	0.956075	10.0789	172.285	0.907723	29.721	218.737	0.941782	22.0106	653.888
Asb11	0.956424	9.86818	394.251	0.93715	22.7763	294.826	0.954226	48.5137	623.676	0.789393	131.129	524.73	0.846064	89.5951	528.112	0.864614	111.708	726.539	0.807296	138.18	711.679	0.898491	62.1295	676.08	0.88141	40.9496	612.585	0.908022	45.631	314.577	0.960392	25.0194	892.855	0.996373	0.580948	2732.24	1	0	0	1	0	0	1	0	0
Asb13	0.973854	5.92091	134.176	0.964448	11.9875	387.789	0.991689	6.06421	236.518	0.983041	8.74195	663.57	0.957992	16.6689	843.248	0.974238	16.6374	581.811	0.973523	14.1321	225.653	0.97811	10.7532	327.451	0.980543	5.1187	86.1309	0.96571	14.2597	537.963	0.990817	8.3398	224.569	0.910774	18.0094	185.492	0.961755	11.5188	163.717	0.954856	10.6147	117.516	0.958418	13.451	589.621
Asb3	0.982569	3.94727	278.12	0.975113	8.39126	1105.92	0.983377	12.1284	569.291	1	0	0	0.984247	6.25082	659.466	0.99632	2.37676	867.303	0.97937	9.42137	300.977	0.982975	8.36358	719.059	0.961085	10.2374	267.814	0.979426	8.55581	816.502	0.98457	8.3398	1141.14	0.964843	6.39043	262.123	0.963331	9.35902	183.658	0.948421	14.8605	311.255	0.939518	19.565	174.033
Asb6	0.982569	3.94727	355.877	0.972623	10.7888	532.089	0.983377	12.1284	1483.77	0.966081	17.4839	412.353	0.9556	22.9197	152.043	0.943318	42.7818	631.448	0.962178	17.2725	404.708	0.970814	14.3376	319.957	0.980543	5.1187	94.1095	0.951994	19.9636	297.165	0.974283	13.8997	612.581	0.919815	15.1047	128.08	0.942305	15.1184	384.128	0.954856	10.6147	384.336	0.944501	19.565	154.347
Asb7	0.982569	3.94727	201.84	0.971558	9.59001	633.547	0.991689	6.06421	173.913	1	0	0	0.963243	14.5852	483.446	0.966877	21.3909	732.847	0.966673	17.2725	509.292	0.990917	5.97399	314.155	0.990271	2.55935	155.352	0.972568	11.4077	599.365	0.989713	5.55986	313.804	0.954957	8.71423	152.448	0.969589	7.91917	248.079	0.945827	12.7376	236.232	0.975732	7.33688	120.881
Asb8	0.973854	5.92091	437.896	0.964448	11.9875	418.377	0.991689	6.06421	129.199	1	0	0	0.984247	6.25082	287.124	0.992639	4.75353	527.679	0.976943	12.5618	114.762	0.995136	2.38959	234.282	0.970814	7.67805	535.204	1	0	0	1	0	0	0.970983	4.64759	102.461	0.938266	15.1184	570.781	0.906233	23.3522	203.425	0.949442	15.8966	213.436
Ascc1	0.947708	11.8418	449.527	0.895605	38.3601	608.367	0.991689	6.06421	264.831	1	0	0	0.961735	22.9197	427.568	0.977918	14.2606	1082.66	0.966673	17.2725	300.116	0.968382	15.5324	464.75	0.941628	15.3561	668.697	0.986284	5.70387	192.546	0.979426	11.1197	444.65	0.868473	25.5617	137.415	0.904152	26.6372	317.981	0.905794	27.5981	307.483	0.935215	25.6791	525.472
Ascc2	0.973854	5.92091	169.338	0.97969	8.39126	389.909	0.991689	6.06421	129.199	1	0	0	0.968494	12.5016	197.397	0.977918	14.2606	387.587	0.986247	6.28091	220.699	0.986106	8.36358	510.706	0.980543	5.1187	142.282	1	0	0	0.989713	5.55986	1483.95	0.926069	13.9428	114.944	0.92259	18.718	382.639	0.936798	14.8605	155.336	0.954638	15.8966	292.345
Ascc3	0.727194	76.9718	616.036	0.784472	91.1051	651.646	0.92151	72.7705	1276.42	0.923096	61.1936	480.939	0.876025	62.5082	728.932	0.873413	111.708	893.522	0.89217	53.3878	830.028	0.9058	65.7139	786.304	0.941628	15.3561	375.901	0.834258	114.077	674.422	0.884746	83.398	1363.69	0.797938	48.2187	247.744	0.775404	80.6316	428.011	0.858425	38.2127	187.531	0.919742	37.9072	604.242
Asf1a	0.934903	19.7364	866.466	0.960892	13.1863	573.579	0.983377	12.1284	503.196	0.932162	34.9678	499.504	0.9139	39.5885	572.472	0.945966	38.0282	953.365	0.912014	50.2473	928.892	0.955903	26.2855	682.585	0.854069	38.3903	362.214	0.958852	17.1116	595.187	0.963996	19.4595	716.676	0.810742	35.4379	188.758	0.869054	38.156	278.572	0.848357	33.9669	255.434	0.905497	31.7932	582.922
Ash1l	0.741339	80.9191	276.615	0.786157	100.695	580.617	0.958444	30.321	434.433	0.966081	17.4839	331.294	0.824546	95.8459	689.012	0.819155	161.62	696.612	0.874151	84.7923	487.398	0.825128	130.233	772.636	0.818333	63.9838	258.073	0.766458	159.708	683.975	0.845075	125.097	912.239	0.704024	94.6946	215.77	0.727124	109.429	404.023	0.745594	93.4089	402.047	0.873272	64.8091	464.604
Ash2l	0.956424	9.86818	477.712	0.934623	25.1738	344.976	0.983377	12.1284	371.65	1	0	0	0.922905	33.3377	463.213	0.944795	35.6515	756.954	0.891546	59.6687	1081.93	0.961085	19.1168	418.046	0.951357	12.7968	218.399	0.972568	11.4077	811.616	0.979426	11.1197	680.337	0.932255	11.619	272.931	0.915841	23.0376	244.577	0.936799	16.9834	321.789	0.96336	13.451	133.951
Asl	0.775491	73.0245	396.953	0.823777	86.3101	498.661	0.898688	97.0273	1041.52	0.886271	69.9356	786.507	0.83794	85.4279	491.344	0.881992	97.4474	866.241	0.879024	76.9412	887.921	0.925699	44.2075	683.516	0.891	38.3903	259.349	0.887553	54.1868	595.247	0.951426	33.3592	703.811	0.795276	42.9902	301.076	0.83393	48.235	286.167	0.735266	82.7943	374.706	0.840187	68.4776	472.935
Asna1	0.915524	21.71	222.092	0.920334	35.9626	321.02	0.958444	30.321	752.866	0.881284	61.1936	735.105	0.903439	43.7557	387.174	0.974238	16.6374	650.506	0.919629	40.8259	595.994	0.943148	31.0647	581.193	0.915396	25.5935	230.688	0.933527	31.3713	450.503	0.939886	36.1391	948.993	0.755063	58.6758	245.993	0.840138	47.515	299.574	0.864568	36.0898	245.406	0.900379	41.5757	514.702
Asns	0.904132	21.71	278.624	0.922942	27.5713	602.169	0.975066	18.1926	1157.87	1	0	0	0.898205	45.8393	439.416	0.948475	33.2747	655.922	0.956383	21.9832	614.504	0.927837	37.0387	800.361	0.925083	23.0342	298.827	0.951994	19.9636	391.935	0.958852	22.2395	512.774	0.938338	10.4571	219.966	0.921271	21.5977	398.935	0.858424	36.0898	322.959	0.958418	13.451	680.69
Asnsd1	0.865774	35.5255	373.735	0.932009	27.5713	482.469	0.95252	42.4495	1328.08	0.983041	8.74195	397.456	0.894979	41.6721	669.782	0.952155	30.8979	543.945	0.915419	48.6771	588.543	0.91845	47.7919	681.893	0.811403	56.3057	441.762	0.903989	39.9271	548.877	0.953709	25.0194	641.021	0.765414	52.8663	309.878	0.850114	46.0752	312.882	0.808304	67.9338	388.917	0.852371	53.8038	543.621
Aspg	0.973854	5.92091	128.959	0.964448	11.9875	362.379	0.975066	18.1926	890.083	0.966081	17.4839	278.435	0.968494	12.5016	446.096	0.857456	130.722	694.363	0.875319	69.0901	688.475	0.954062	28.6751	391.055	0.941628	15.3561	323.554	0.94719	25.6674	319.621	0.974283	13.8997	1291.63	0.996373	0.580948	88.0747	1	0	0	1	0	0	1	0	0
Asph	1	0	0	0.978669	7.19251	521.695	0.93351	48.5137	596.723	0.915203	43.7097	377.349	0.929574	33.3377	403.001	0.790116	194.895	994.592	0.85803	84.7923	562.581	0.964291	19.1168	822.943	0.941628	15.3561	682.738	0.916404	45.631	273.187	0.960392	25.0194	819.424	0.883697	23.8189	144.896	0.89868	28.797	261.446	0.896841	31.844	461.939	0.952048	17.1194	400.677
Aspscr1	0.921562	17.7627	290.206	0.894028	41.9563	768.686	0.925199	54.5779	498.248	0.949122	26.2258	441.94	0.919128	37.5049	578.098	0.936925	49.9121	780.611	0.928248	40.8259	375.535	0.941202	39.4283	718.68	0.92217	20.4748	180.611	0.913005	39.9271	498.185	0.941233	38.9191	563.357	0.860886	23.8189	208.217	0.893122	28.0771	385.146	0.875686	46.7045	398.781	0.915411	31.7932	512.433
Asrgl1	0.947708	11.8418	146.356	0.954901	16.7825	735.97	1	0	0	0.983041	8.74195	868.81	0.96594	18.7525	414.079	0.97532	19.0141	1206.09	0.956383	21.9832	736.721	0.901512	56.1555	780.531	0.825869	58.8651	418.193	0.887553	54.1868	434.003	0.905417	58.3786	482.982	0.872823	22.657	350.529	0.904898	27.3571	242.04	0.915213	19.1064	423.744	0.921845	26.9019	414.132
Ass1	0.828669	51.3145	280.166	0.87461	51.5463	596.524	0.966755	24.2568	1311.48	1	0	0	1	0	0	0.99632	2.37676	2808.99	0.994456	10.9916	348.779	0.88419	83.6358	809.267	0.748785	112.611	366.898	0.87389	59.8907	714.984	0.928225	52.8187	675.633	0.720298	90.047	312.386	0.689058	126.707	457.877	0.708486	135.868	505.792	0.776795	143.069	652.737
Asun	0.956424	9.86818	100.827	0.964448	11.9875	299.204	0.991689	6.06421	976.562	1	0	0	0.943867	25.0033	535.333	0.964327	26.1444	423.595	0.983764	9.42137	289.777	0.974	14.3376	493.051	0.961085	10.2374	374.004	0.979426	8.55581	953.734	0.989713	5.55986	986.966	0.945028	11.038	171.168	0.944535	13.6786	154.365	0.945827	12.7376	136.97	0.973539	8.5597	321.041
Asxl1	0.947708	11.8418	357.645	0.897565	40.7576	367.445	0.991689	6.06421	295.596	0.966081	17.4839	285.723	0.926723	39.5885	383.796	0.95064	38.0282	907.182	0.965616	15.7023	378.322	0.960729	23.8959	616.994	0.954062	15.3561	121.711	0.972568	11.4077	410.08	0.970617	19.4595	600.352	0.923829	12.1999	155.8	0.964152	10.0789	154.081	0.963885	8.49172	351.997	0.970891	11.0053	174.839
Asxl2	0.869806	39.4727	252.528	0.844261	87.5089	578.653	0.958444	30.321	1398.62	1	0	0	0.960778	20.8361	424.51	0.95795	33.2747	681.477	0.936772	32.9748	403.459	0.94642	38.2335	606.252	0.955885	17.9155	272.885	0.948776	28.5194	271.379	0.950146	30.5793	596.84	0.848616	30.2093	115.955	0.872335	41.7556	296.166	0.939454	16.9834	118.261	0.960558	15.8966	484.652
Atad1	0.818129	51.3145	733.781	0.901101	39.5588	562.005	0.900265	72.7705	1063.2	0.864324	69.9356	876.664	0.920417	39.5885	471.189	0.892087	87.9403	967.975	0.898375	56.5282	738.077	0.920867	46.5971	455.432	0.873527	33.2716	276.245	0.839571	88.41	663.437	0.91185	58.3786	668.039	0.793968	44.733	196.126	0.827952	53.9944	326.369	0.859628	48.8274	233.335	0.863688	50.1354	549.603
Atad2	0.956424	9.86818	435.913	0.96554	13.1863	464.942	0.991689	6.06421	2118.64	0.983041	8.74195	1035.2	1	0	0	0.977918	14.2606	528.882	0.973523	14.1321	272.641	0.990917	5.97399	232.393	1	0	0	0.986284	5.70387	222.322	0.989713	5.55986	122.907	0.939502	10.4571	261.215	0.973471	7.91917	209.617	0.950274	16.9834	278.408	0.984879	4.89126	506.803
Atad2b	0.967451	9.86818	288.076	0.972623	10.7888	339.035	0.983377	12.1284	1611.69	1	0	0	0.946332	29.1705	303.064	0.964327	26.1444	565.471	0.964859	21.9832	402.982	0.978849	11.948	445.101	0.990271	2.55935	71.22	0.972568	11.4077	601.879	0.985836	11.1197	1206.63	0.912595	16.8475	172.429	0.939998	16.5583	258.519	0.945827	14.8605	143.729	0.981099	6.11407	672.458
Atad3a	0.921562	17.7627	145.24	0.902704	35.9626	651.023	0.966755	24.2568	1383.86	0.915203	43.7097	335.468	0.899579	47.923	633.112	0.960657	28.5212	799.635	0.949518	25.1237	693.433	0.952673	32.2595	565.532	0.931899	17.9155	616.953	0.933527	31.3713	841.888	0.939886	36.1391	927.474	0.887284	23.2379	170.396	0.897919	28.0771	288.042	0.914734	25.4752	308.084	0.918227	34.2388	420.921
Atat1	0.973854	5.92091	410.607	0.985779	4.79501	552.783	1	0	0	1	0	0	0.994749	2.08361	756.43	0.992639	4.75353	560.855	0.975931	10.9916	374.702	0.990271	4.77919	838.749	0.980543	5.1187	650.898	0.986284	5.70387	687.27	0.994857	2.77993	1582.28	0.956474	6.97138	100.513	0.965487	8.6391	151.96	0.939454	19.1064	355.176	0.965979	11.0053	400.058
Ate1	0.889444	27.6309	260.193	0.888714	46.7513	465.986	0.944265	48.5137	1350.84	0.966081	17.4839	288.012	0.928147	31.2541	567.511	0.974238	16.6374	910.97	0.955301	20.413	206.762	0.956221	21.5064	385.754	0.951357	12.7968	585.312	0.960822	19.9636	525.202	0.974283	13.8997	1049.12	0.881987	23.2379	206.051	0.856299	44.6353	335.592	0.898841	33.9669	389.276	0.887843	39.13	352.092
Atf1	0.874446	33.5518	196.567	0.903554	43.1551	390.125	0.95252	42.4495	612.204	1	0	0	0.908671	41.6721	428.285	0.939654	45.1585	1108.71	0.944986	25.1237	675.067	0.957004	22.7012	822.627	0.925083	23.0342	278.047	0.910847	37.0752	620.711	0.910542	55.5986	903.273	0.796806	44.1521	161.114	0.86519	38.156	279.449	0.850823	50.9503	378.821	0.896586	33.016	400.658
Atf2	0.862054	57.2354	491.329	0.862302	65.9314	648.001	0.95252	42.4495	826.842	1	0	0	0.891101	68.759	470.753	0.924985	54.6656	584.974	0.922223	45.5366	369.64	0.906256	59.7399	507.187	0.818297	51.187	317.677	0.878688	68.4465	416.868	0.903936	55.5986	892.081	0.785315	44.733	205.558	0.867884	44.6353	227.395	0.818361	53.0733	282.969	0.906115	36.6844	363.69
Atf3	0.589344	665.115	1278.66	0.527157	1286.26	2480.71	0.763064	612.485	2203.64	0.77669	358.42	1602.69	0.545697	1564.79	2440.14	0.782624	648.857	2045.76	0.731172	896.6	2205.98	0.72291	831.579	2516.27	0.524896	903.451	1824.03	0.785759	479.125	1669.62	0.815636	450.349	2571.37	0.547911	712.243	1177.35	0.563508	852.391	1779.41	0.500698	982.917	1572.78	0.648062	868.198	2226.27
Atf4	0.642721	485.514	953.001	0.591418	788.779	1603.41	0.88447	278.954	1937.69	1	0	0	0.659072	823.025	1503.9	0.900494	209.155	1600.41	0.830067	392.557	1306.29	0.847064	339.322	1185.57	0.660173	540.023	1098.4	0.926567	94.1139	634.264	0.877796	227.954	1424.16	0.475844	798.804	1083.68	0.588235	724.964	1215.56	0.584583	607.158	1071.73	0.754576	453.664	1027.23
Atf5	0.803707	71.0509	298.739	0.823734	94.7014	522.231	0.975066	18.1926	1036.31	0.966081	17.4839	1764.1	0.801759	112.515	660.449	0.931262	47.5353	1020.19	0.891546	59.6687	646.874	0.974623	15.5324	804.141	0.954062	15.3561	169.505	0.945137	22.8155	360.907	0.971673	22.2395	497.297	0.876598	28.4665	238.523	0.913493	25.1974	301.451	0.919245	16.9834	248.595	0.978405	8.5597	571.515
Atf6	0.813285	57.2354	338.009	0.891391	44.3538	483.197	0.908452	97.0273	798.069	0.966081	17.4839	1033.57	0.943867	25.0033	486.358	0.921315	57.0424	536.291	0.941072	32.9748	221.355	0.95107	28.6751	402.259	0.915396	25.5935	321.591	0.896064	54.1868	538.994	0.924484	44.4789	726.101	0.824626	38.3426	145.495	0.878375	35.2763	287.273	0.891722	38.2127	351.738	0.94271	24.4563	515.931
Atf6b	0.880745	29.6045	397.106	0.930047	25.1738	619.831	0.93351	48.5137	740.947	0.915203	43.7097	953.151	0.933389	29.1705	803.194	0.901839	66.5494	815.662	0.943622	29.8343	790.815	0.940705	38.2335	658.604	0.963667	12.7968	344.098	0.863682	71.2984	351.491	0.952479	36.1391	505.832	0.922452	14.5237	112.788	0.9247	17.9981	458.183	0.942955	21.2293	177.938	0.945672	17.1194	350.779
Atf7	0.982569	3.94727	167.62	0.969082	11.9875	373.362	0.991689	6.06421	478.469	1	0	0	0.973745	10.418	265.027	0.99632	2.37676	230.203	0.996562	1.57023	76.0572	0.987839	5.97399	417.001	0.980543	5.1187	609.204	0.972568	11.4077	276.532	0.994857	2.77993	477.099	0.97461	4.06664	288.91	0.965487	7.91917	177.166	0.972914	6.36879	190.717	0.99244	2.44563	433.947
Atf7ip	0.982569	3.94727	108.617	0.968003	10.7888	189.578	0.991689	6.06421	274.801	0.983041	8.74195	397.456	0.973745	10.418	516.458	0.974238	16.6374	941.861	0.97937	9.42137	419.912	0.98369	9.55838	540.993	0.931899	17.9155	279.285	0.993142	2.85194	280.034	0.979426	11.1197	386.097	0.963728	5.80948	95.657	0.971762	6.47932	279.493	0.939454	16.9834	236.027	0.977319	7.33688	491.166
Atg10	0.947708	11.8418	200.924	0.953782	15.5838	604.838	0.991689	6.06421	526.316	1	0	0	0.978996	8.33443	1195.64	0.978975	16.6374	1479.42	0.962178	17.2725	396.539	0.980543	9.55838	1340.68	0.941628	15.3561	233.604	0.958852	17.1116	396.912	0.970617	19.4595	1027.43	0.832316	34.8569	190.362	0.881482	30.9568	292.113	0.863163	44.5815	147.283	0.918227	35.4616	443.401
Atg101	0.859967	53.2882	306.573	0.862969	59.9376	482.419	0.874409	157.669	716.54	0.826668	122.387	660.745	0.899579	47.923	950.764	0.91864	61.7959	840.264	0.883709	69.0901	810.211	0.877492	88.415	679.716	0.789662	112.611	269.133	0.908022	45.631	937.639	0.91185	58.3786	1008.18	0.803946	42.4092	186.32	0.858159	38.8759	466.477	0.813601	61.565	313.381	0.90501	51.3582	405.686
Atg12	0.826762	49.3409	259.466	0.907759	43.1551	503.725	0.966755	24.2568	1009.76	0.932162	34.9678	601.855	0.9139	39.5885	631.593	0.94229	40.405	809.582	0.930828	37.6855	533.934	0.932342	39.4283	719.65	0.866878	38.3903	382.687	0.951994	19.9636	524.03	0.943422	30.5793	366.252	0.731137	56.933	188.009	0.849494	49.6748	385.064	0.845262	44.5815	362.111	0.866265	59.9179	423.071
Atg13	0.839735	41.4464	214.107	0.901975	40.7576	446.088	0.975066	18.1926	555.195	1	0	0	0.90082	50.0066	445.136	0.933272	52.2888	702.677	0.970927	17.2725	471.229	0.963517	17.922	422.158	0.896001	30.7122	213.273	0.96571	14.2597	452.949	0.98457	8.3398	481.163	0.899991	19.7522	130.532	0.921562	18.718	202.164	0.909712	21.2293	538.679	0.945543	20.7878	513.559
Atg14	0.912847	19.7364	143.866	0.968003	10.7888	641.968	0.966755	24.2568	1168.7	1	0	0	0.957992	16.6689	284.863	0.976128	21.3909	534.949	0.952951	23.5534	437.214	0.970814	14.3376	478.452	0.963667	12.7968	325.621	0.974388	14.2597	659.571	0.98457	8.3398	955.827	0.945592	8.71423	115.002	0.937634	17.9981	319.074	0.950888	10.6147	287.001	0.96336	13.451	266.288
Atg16l1	0.906834	23.6836	192.738	0.944252	20.3788	580.325	0.958444	30.321	1136.64	1	0	0	0.940004	29.1705	401.184	0.94698	40.405	896.561	0.948425	23.5534	777.641	0.975678	11.948	538.085	0.961085	10.2374	275.88	0.979426	8.55581	385.845	0.98457	8.3398	732.766	0.9333	12.1999	228.258	0.9247	17.2782	434.991	0.939454	16.9834	124.948	0.99244	2.44563	148.352
Atg16l2	0.991285	1.97364	165.755	0.99289	2.3975	428.886	0.991689	6.06421	129.199	0.983041	8.74195	252.08	0.978996	8.33443	276.639	0.99632	2.37676	464.253	0.975931	10.9916	927.826	0.992703	3.58439	182.295	1	0	0	0.958852	17.1116	188.994	0.98457	8.3398	249.913	0.97461	4.06664	107.687	0.971762	6.47932	130.361	0.972914	6.36879	83.2987	0.984879	4.89126	196.395
Atg2a	0.912847	19.7364	287.555	0.906305	40.7576	472.097	0.949447	72.7705	1087.26	0.949122	26.2258	621.894	0.936987	25.0033	267.517	0.952155	30.8979	727.15	0.972493	12.5618	362.743	0.958317	25.0907	644.558	0.961085	10.2374	363.902	0.981115	11.4077	176.446	0.974283	13.8997	1240.91	0.943124	9.87612	109.561	0.938266	15.1184	493.218	0.921483	21.2293	254.041	0.971765	12.2281	240.443
Atg2b	0.898141	25.6573	274.023	0.919389	28.77	365.099	0.96896	30.321	580.939	0.966081	17.4839	643.638	0.906013	47.923	527.553	0.915352	54.6656	636.837	0.963244	18.8427	457.681	0.97811	10.7532	244.313	0.970814	7.67805	408.335	0.96571	14.2597	631.761	0.98457	8.3398	565.403	0.883678	21.4951	127.948	0.926661	18.718	293.152	0.92777	16.9834	170.717	0.973539	8.5597	149.898
Atg3	0.885159	33.5518	236.801	0.8743	45.5526	433.247	0.966755	24.2568	1140.94	0.985631	17.4839	369.14	0.872018	56.2574	687.396	0.884797	92.6938	696.742	0.878356	75.371	651.689	0.853643	93.1942	831.64	0.747587	92.1366	387.309	0.892156	62.7426	782.954	0.910542	55.5986	637.254	0.746918	55.7711	274.584	0.790185	61.9135	268.108	0.843556	57.3191	428.872	0.878108	57.4722	378.561
Atg4a	0.956424	9.86818	513.639	0.97969	8.39126	236.45	1	0	0	1	0	0	0.978996	8.33443	381.775	0.99632	2.37676	1385.04	0.951863	21.9832	884.811	0.995136	2.38959	324.863	0.961085	10.2374	1111.73	0.993142	2.85194	692.521	0.98457	8.3398	279.758	0.985491	2.32379	418.958	0.984312	3.59962	628.731	1	0	0	0.99244	2.44563	213.571
Atg4b	0.941556	15.7891	286.723	0.952318	19.18	374.544	0.975066	18.1926	769.315	1	0	0	0.922905	33.3377	243.324	0.941114	38.0282	760.488	0.933345	34.545	685.754	0.971574	15.5324	574.673	0.963667	12.7968	148.989	0.951994	19.9636	582.613	0.969139	16.6796	805.85	0.924308	15.1047	196.02	0.896295	30.2368	312.185	0.882626	27.5981	265.499	0.92672	26.9019	435.891
Atg4c	0.991285	1.97364	156.079	0.969082	11.9875	407.659	0.975066	18.1926	1240.14	1	0	0	0.984247	6.25082	492.928	0.992639	4.75353	985.41	1	0	0	0.992703	3.58439	153.89	1	0	0	0.979426	8.55581	181.317	0.994857	2.77993	83.8785	0.972069	5.22854	294.576	0.976565	7.91917	198.386	0.954856	10.6147	103.131	0.959591	14.6738	432.814
Atg4d	0.917694	23.6836	144.539	0.947803	19.18	725.007	0.991689	6.06421	2298.85	1	0	0	0.973745	10.418	828.231	0.970557	19.0141	869.711	0.976943	12.5618	684.479	0.975678	11.948	538.664	0.980543	5.1187	271.74	0.96571	14.2597	238.885	1	0	0	0.888275	21.4951	149.359	0.934112	15.1184	210.778	0.948421	14.8605	361.366	0.947078	18.3422	365.567
Atg5	0.905419	33.5518	184.891	0.920444	29.9688	482.418	0.944265	48.5137	908.973	0.966081	17.4839	394.992	0.912417	37.5049	836.417	0.965243	28.5212	592.509	0.925475	36.1153	872.788	0.952851	26.2855	546.748	0.951357	12.7968	324.335	0.945137	22.8155	818.332	0.965508	22.2395	925.53	0.820212	41.8283	253.247	0.764337	70.5526	372.673	0.827333	50.9503	340.029	0.880382	53.8038	450.091
Atg7	0.973854	5.92091	140.607	0.960892	13.1863	601.986	0.991689	6.06421	765.111	1	0	0	0.975205	12.5016	1377.26	0.963196	23.7676	609.648	0.981063	12.5618	432.751	0.968448	21.5064	513.214	0.980543	5.1187	127.257	0.936638	37.0752	1227.36	0.98457	8.3398	591.375	0.961226	6.97138	99.3328	0.93605	16.5583	450.819	0.963885	8.49172	160.567	0.965979	12.2281	643.016
Atg9a	0.982569	3.94727	177.268	0.971558	9.59001	512.855	0.991689	6.06421	203.128	0.966081	17.4839	205.177	0.963243	14.5852	166.392	0.937434	40.405	692.916	0.966673	17.2725	194.213	0.96738	19.1168	631.07	0.961085	10.2374	218.53	0.910847	37.0752	343.976	0.963996	19.4595	232.563	0.927457	11.619	103.305	0.944535	13.6786	378.069	0.96628	10.6147	160.045	0.989591	4.89126	249.454
Atic	0.96048	13.8155	249.269	0.93715	22.7763	559.288	0.970324	36.3852	802.531	0.966081	17.4839	504.616	0.968494	12.5016	368.367	0.988959	7.13029	471.405	1	0	0	0.980543	9.55838	559.638	0.990271	2.55935	349.04	0.986284	5.70387	210.98	0.994857	2.77993	950.57	0.979279	4.06664	140.258	0.9749	5.7594	318.689	0.968061	6.36879	391.945	0.98866	3.66844	270.869
Atl2	0.898141	25.6573	271.94	0.930047	25.1738	363.535	0.93351	48.5137	952.169	0.915203	43.7097	471.426	0.917425	45.8393	683.448	0.904937	73.6797	624.992	0.931233	31.4046	485.221	0.955275	25.0907	584.16	0.944422	17.9155	743.362	0.933527	31.3713	537.315	0.903936	55.5986	795.362	0.732002	68.5519	203.079	0.747464	85.671	448.472	0.820134	67.9338	370.313	0.847547	73.3688	543.375
Atl3	0.906834	23.6836	161.908	0.948782	20.3788	331.065	0.96896	30.321	501.101	0.983041	8.74195	361.925	0.968494	12.5016	359.679	0.917644	59.4191	496.739	0.929717	43.9664	305.421	0.959433	21.5064	461.935	0.961085	10.2374	196.102	0.931421	28.5194	421.632	0.920785	50.0388	753.137	0.80086	47.0568	194.325	0.869053	38.156	254.209	0.893267	38.2127	184.04	0.934353	20.7878	379.625
Atm	0.932887	17.7627	547.303	0.964448	11.9875	263.12	0.983377	12.1284	269.172	0.983041	8.74195	345.662	0.989498	4.16721	959.253	0.985279	9.50706	660.524	0.993123	3.14046	152.944	0.985407	7.16878	249.622	0.990271	2.55935	117.841	0.96571	14.2597	456.139	0.980791	13.8997	343.271	0.964843	6.39043	316.425	0.96235	8.6391	146.859	0.963885	8.49172	131.625	0.981099	6.11407	149.553
Atmin	0.904132	21.71	205.202	0.945245	21.5775	574.472	0.991689	6.06421	1402.52	0.966081	17.4839	538.739	0.963243	14.5852	348.309	0.960657	28.5212	661.836	0.982808	7.85114	116.21	0.975678	11.948	359.816	0.961085	10.2374	293.411	0.979426	8.55581	211.601	0.963996	19.4595	1063.22	0.958719	6.39043	249.354	0.954907	10.0789	202.419	0.945827	12.7376	94.519	0.964301	14.6738	380.339
Atn1	0.860555	31.5782	216.858	0.939069	25.1738	455.69	0.983377	12.1284	293.014	0.983041	8.74195	361.925	0.963243	14.5852	138.925	0.992639	4.75353	669.411	0.962178	17.2725	349.446	0.975678	11.948	506.079	0.961085	10.2374	102.549	0.958852	17.1116	521.679	0.989713	5.55986	1328.14	0.911596	15.6856	105.489	0.910381	25.9173	249.028	0.924179	16.9834	87.0254	0.968256	9.78251	186.901
Atox1	0.671106	363.149	565.852	0.784268	327.259	766.809	0.966218	90.9631	1117.15	0.971263	34.9678	3629.34	0.7844	385.467	1026.62	0.90583	183.011	1163.61	0.739555	780.404	1695.3	0.792522	512.568	1531.09	0.617117	619.363	1143.02	0.885577	128.337	861.152	0.894961	191.815	1259.45	0.310788	1216.51	1585.99	0.465851	986.297	1455.47	0.385121	938.335	1485.27	0.588234	893.877	1669.44
Atp10b	0.799506	102.629	419.727	0.852782	88.7076	1080.56	0.991689	6.06421	439.754	1	0	0	1	0	0	0.734135	289.965	877.269	0.905076	73.8007	700.409	0.990271	4.77919	960.557	1	0	0	1	0	0	0.994857	2.77993	1915.71	0.947746	9.87612	103.204	0.947669	12.9586	202.921	0.948421	14.8605	236.742	0.95582	15.8966	304.401
Atp11a	0.984441	5.92091	252.545	0.944252	20.3788	484.335	0.91328	78.8347	750.946	0.915203	43.7097	366.336	0.861614	70.8426	491.195	0.846638	137.852	793.515	0.882428	86.3626	564.746	0.899954	72.8826	610.373	0.886297	33.2716	482.866	0.745247	145.449	523.097	0.860469	100.078	758.345	0.813923	40.0854	137.378	0.861763	46.7951	279.675	0.8785	48.8274	379.656	0.916434	33.016	312.142
Atp11b	0.928001	23.6836	227.937	0.92399	28.77	337.894	0.975066	18.1926	966.929	0.966081	17.4839	266.429	0.930807	35.4213	385.068	0.9103	64.1726	732.202	0.909386	53.3878	382.288	0.905014	51.3763	385.611	0.93476	20.4748	190.75	0.808599	108.374	466.174	0.933276	50.0388	614.307	0.781733	45.314	125.94	0.862478	42.4756	216.775	0.860946	42.4586	429.758	0.916434	33.016	241.832
Atp11c	0.973854	5.92091	123.391	0.972623	10.7888	632.382	0.991689	6.06421	274.801	0.983041	8.74195	311.526	1	0	0	0.985279	9.50706	792.394	0.986247	6.28091	192.974	0.987839	5.97399	196.739	0.991757	5.1187	140.756	0.945137	22.8155	576.288	0.960392	25.0194	736.655	0.950368	8.71423	98.5449	0.971762	6.47932	231.242	0.954856	10.6147	239.337	0.984879	4.89126	93.8694
Atp13a1	0.956424	9.86818	169.217	0.954901	16.7825	478.843	0.96896	30.321	647.978	1	0	0	0.964787	16.6689	568.575	0.9103	64.1726	739.629	0.956383	21.9832	501.331	0.964291	19.1168	446.202	0.954062	15.3561	234.395	0.896064	54.1868	409.587	0.938279	33.3592	651.256	0.9333	12.1999	114.667	0.931996	16.5583	264.534	0.957367	12.7376	847.971	0.952048	17.1194	681.517
Atp13a2	0.932887	17.7627	210.905	0.927535	27.5713	305.272	0.944265	48.5137	1188.59	1	0	0	0.968494	12.5016	400.78	1	0	0	0.993123	3.14046	417.728	0.995136	2.38959	1584.34	0.990271	2.55935	155.352	0.986284	5.70387	171.827	0.979426	11.1197	321.67	0.923829	12.1999	175.341	0.963331	9.35902	162.791	0.918741	21.2293	462.304	0.970891	11.0053	451.212
Atp13a3	0.926309	21.71	388.727	0.909023	38.3601	497.413	0.958444	30.321	692.92	0.915203	43.7097	535.216	0.832763	87.5115	582.116	0.860973	114.085	764.29	0.914163	54.958	408.091	0.930528	41.8179	524.239	0.951357	12.7968	380.414	0.854395	85.5581	412.149	0.880709	88.9578	780.682	0.703219	127.809	258.959	0.740424	145.425	424.92	0.786537	178.326	610.413	0.865028	73.3688	421.103
Atp13a4	0.898141	25.6573	142.182	0.921405	31.1675	471.545	0.991689	6.06421	188.786	1	0	0	0.990625	6.25082	2695.76	0.794886	144.983	614.81	0.909243	62.8091	931.238	0.855156	96.7786	587.483	0.862263	63.9838	293.626	0.674601	168.264	540.331	0.871596	97.2976	579.97	1	0	0	0.994727	5.7594	1039.39	1	0	0	1	0	0
Atp1a1	0.742287	114.471	475.823	0.745365	152.241	673.196	0.898688	97.0273	791.771	0.829723	131.129	1099.02	0.732477	177.107	599.858	0.613302	551.409	1132.95	0.729532	273.22	789.912	0.729617	262.855	852.003	0.657488	202.189	475.65	0.515418	539.016	950.009	0.653802	383.631	1043.78	0.516768	370.645	509.508	0.489844	392.359	701.774	0.583047	377.882	708.239	0.617844	332.605	792.707
Atp1b1	0.826762	49.3409	306.217	0.884478	71.9251	403.511	0.924624	84.8989	771.997	0.669987	236.033	762.19	0.7881	156.271	851.15	0.582914	520.511	1106.74	0.690297	365.863	1006.95	0.923166	59.7399	659.951	0.883256	30.7122	261.486	0.871914	57.0387	439.138	0.889808	80.618	734.874	0.76988	61.5805	171.739	0.815527	66.953	374.584	0.781794	87.0401	320.578	0.884816	53.8038	305.323
Atp1b3	0.885159	33.5518	339.737	0.909023	38.3601	272.522	0.941821	42.4495	473.653	0.881284	61.1936	908.262	0.917661	35.4213	516.953	0.877229	85.5635	850.91	0.941854	34.545	533.104	0.925083	43.0127	497.496	0.888844	35.8309	324.355	0.844505	68.4465	323.387	0.881701	63.9384	828.683	0.781088	42.4092	180.306	0.857325	37.4361	350.104	0.865122	44.5815	273.645	0.931463	28.1247	501.791
Atp2a2	0.603536	169.733	334.628	0.679221	239.75	766.3	0.749829	321.403	1115.81	0.790153	192.323	837.937	0.731931	193.775	597.891	0.720627	323.24	952.772	0.816556	158.593	629.245	0.827158	157.713	744.007	0.812469	71.6618	588.258	0.593096	325.121	750.427	0.801608	200.155	695.016	0.800751	51.7044	278.231	0.805892	79.1917	529.871	0.837577	65.8108	483.661	0.910753	36.6844	360.847
Atp2b1	0.810837	67.1036	490.439	0.696504	148.645	573.443	0.783143	254.697	1086.13	0.876415	96.1614	454.752	0.865057	93.7623	444.747	0.859669	123.592	716.498	0.902586	56.5282	678.138	0.840693	127.843	651.199	0.845079	53.7464	372.43	0.731528	191.08	573.475	0.86504	113.977	879.232	0.759629	68.5519	207.505	0.808207	61.1936	333.258	0.811587	57.3191	512.508	0.913032	41.5757	516.798
Atp2b3	0.991285	1.97364	78.8022	0.99289	2.3975	437.503	1	0	0	0.966081	17.4839	340.333	0.919128	37.5049	351.311	0.825671	154.49	662.56	0.884187	80.0817	676.698	0.924419	47.7919	513.356	0.88141	40.9496	292.242	0.842221	94.1139	371.732	0.886295	72.2782	391.671	1	0	0	0.993725	1.43985	194.218	1	0	0	0.99622	1.22281	74.8335
Atp2b4	0.733065	138.155	411.81	0.775069	212.179	750.945	0.803498	218.311	783	0.83232	139.871	654.113	0.740061	204.193	641.518	0.81166	180.634	894.212	0.879602	89.503	431.137	0.903624	86.0254	536.832	0.807623	81.8992	403.267	0.708008	239.563	636.899	0.881893	113.977	512.084	0.951353	9.29518	133.514	0.924395	20.1579	346.003	0.918741	21.2293	112.384	0.983095	4.89126	208.434
Atp2c1	0.952001	15.7891	475.542	0.957337	14.385	550.192	0.985162	18.1926	1135.43	1	0	0	0.973745	10.418	410.72	0.959516	26.1444	630.211	0.975931	10.9916	531.478	0.977031	14.3376	536.372	0.961085	10.2374	253.52	0.945137	22.8155	643.547	0.950146	30.5793	881.647	0.845241	26.1427	162.032	0.90648	25.1974	329.691	0.887878	31.844	189.356	0.919182	30.5703	335.329
Atp4a	0.900423	27.6309	677.154	0.881835	89.9064	780.369	0.750999	278.954	1063.52	0.932162	34.9678	441.07	0.896772	54.1738	679.275	0.933272	52.2888	733.988	0.932407	40.8259	563.342	0.992703	3.58439	662.978	0.980543	5.1187	397.786	1	0	0	0.994857	2.77993	269.76	0.927165	17.4285	194.71	0.93064	18.718	288.527	0.912486	23.3522	325.569	0.950858	17.1194	442.469
Atp5a1	0.748246	171.706	670.576	0.732964	231.359	798.09	0.892181	109.156	1145.18	0.8566	96.1614	964.621	0.76833	214.612	995.103	0.759219	237.676	918.399	0.76706	281.071	1059.43	0.760613	216.258	1041.46	0.609003	248.257	683.193	0.702301	193.932	619.367	0.788116	189.035	853.301	0.617765	209.722	537.245	0.57079	309.568	702.697	0.596208	371.513	827.297	0.612859	344.833	986.216
Atp5b	0.773283	189.469	452.219	0.810011	272.117	632.523	0.985917	24.2568	786.207	0.944043	87.4195	1532.97	0.879849	162.521	690.463	0.907315	221.039	1124.61	0.825116	336.029	1162.69	0.823538	215.064	1205.52	0.672137	307.122	855.737	0.72733	268.082	803.054	0.824019	255.754	970.967	0.539073	405.502	641.509	0.569028	538.504	941.413	0.598588	658.108	1076.11	0.626285	714.123	1369.25
Atp5c1	0.849677	108.55	308.588	0.868706	142.651	716.639	0.96896	30.321	1526.31	0.985631	17.4839	1007.56	0.891074	122.933	694.184	0.956756	71.3029	1158.7	0.827118	304.624	1301.53	0.887948	172.051	1022.79	0.777543	258.494	678.083	0.988379	11.4077	875.985	0.949384	86.1779	1238.22	0.569207	342.179	672.839	0.696414	300.209	740.952	0.633168	445.815	913.547	0.756744	402.306	894.178
Atp5d	0.753438	228.942	406.45	0.833817	245.744	616.552	0.964792	60.6421	686.518	0.971263	34.9678	581.368	0.869708	152.103	580.441	0.929993	133.099	1496.68	0.819172	417.681	1185.1	0.838834	388.309	1367.28	0.71764	435.09	809.882	0.786577	293.749	1148.95	0.920822	202.935	1160.3	0.423627	821.461	1085.32	0.531122	777.519	1155.43	0.528162	806.714	1283.14	0.604775	807.057	1408.16
Atp5e	0.651709	676.957	972.763	0.697383	779.189	1388.6	0.959986	139.477	2310.16	0.985631	17.4839	374.392	0.676123	737.597	1455.12	0.917722	152.113	1353.38	0.785778	684.62	1539.96	0.751284	701.346	1759.98	0.606918	734.534	1138.59	0.902665	105.522	1426.23	0.882737	225.175	1395.64	0.284817	1368.71	1857.52	0.457768	1043.17	1529.03	0.33354	1171.86	1947.8	0.534386	1023.5	1995.12
Atp5f1	0.822692	71.0509	440.164	0.792393	135.459	768.277	0.93351	48.5137	1101.38	0.8566	96.1614	433.435	0.802684	114.598	1014.19	0.810627	137.852	764.303	0.785689	196.279	1175.4	0.810529	144.57	875.428	0.695612	191.951	723.092	0.811151	114.077	655.265	0.812092	172.356	1125.08	0.614676	237.608	538.218	0.600436	311.008	773.965	0.552478	384.25	794.826	0.678515	374.181	1041.59
Atp5g1	0.602592	538.803	852.067	0.681816	738.431	1317.89	0.835721	369.917	1836.8	0.930307	113.645	1117.98	0.667196	789.687	1682.95	0.940973	92.6938	1520.3	0.8074	554.291	1447.79	0.87217	253.297	1272.26	0.71775	355.75	826.677	0.976759	22.8155	1514.89	0.936591	108.417	1626.24	0.274205	1336.18	1855.21	0.441611	1143.24	1614.55	0.367562	1199.46	1923.04	0.499916	1184.91	2020.45
Atp5g2	0.810235	185.522	389.324	0.842712	245.744	499.117	0.972266	54.5779	1303.92	0.971263	34.9678	2230.89	0.820113	250.033	990.033	0.958661	54.6656	1359.79	0.811313	365.863	1230.44	0.867571	240.154	1266.64	0.678157	396.699	798.061	0.983275	25.6674	1101.74	0.914401	125.097	1089.88	0.413405	692.491	1046.23	0.595311	522.665	985.349	0.473875	598.666	1183.39	0.688977	430.43	1021.57
Atp5g3	0.770487	161.838	611.632	0.807177	175.018	644.247	0.911154	72.7705	1060.24	0.949122	26.2258	369.926	0.746338	208.361	772.849	0.836676	163.997	1000.37	0.764844	282.641	1133.47	0.829508	169.661	1037.15	0.763302	122.849	600.599	0.844511	99.8178	612.396	0.892552	88.9578	940.211	0.581643	287.57	603.336	0.663901	293.729	678.643	0.578224	373.636	821.421	0.711535	324.046	952.783
Atp5h	0.714241	440.121	782.758	0.733609	513.066	1132.05	0.925165	175.862	2762.99	0.972021	43.7097	1798.24	0.753395	387.551	1197.92	0.944479	92.6938	1629.61	0.838967	375.285	1282.87	0.803868	451.633	1747.04	0.541316	719.178	1123.15	0.937142	71.2984	618.034	0.878998	247.414	1192.22	0.350096	786.604	1333.47	0.499368	823.594	1347.67	0.453948	1108.17	1686.94	0.50178	1183.68	2039.06
Atp5j	0.670686	349.334	646.465	0.791002	315.272	730.631	0.911465	212.247	1946.3	0.930731	122.387	951.102	0.816954	281.287	862.032	0.879489	256.691	1579.56	0.791329	436.524	1282.35	0.824504	329.764	1290.04	0.656942	511.87	965.502	0.880862	145.449	826.435	0.882311	216.835	1280.58	0.350608	944.041	1340.52	0.484379	840.152	1382.33	0.416529	953.196	1515.17	0.53982	1027.16	1863.43
Atp5j2	0.70622	349.334	698.41	0.783127	359.626	973.262	0.938975	157.669	1569.96	0.956894	52.4517	1363.93	0.753537	391.718	924.893	0.903186	197.271	1353.66	0.777426	593.546	1461.78	0.83887	362.024	1364.25	0.665351	511.87	959.85	0.897707	122.633	720.889	0.883473	250.194	1446.67	0.324912	1057.33	1553.27	0.48077	958.94	1375.58	0.314663	1093.31	1741.85	0.501665	1156.78	2112.01
Atp5k	0.776098	146.049	450.261	0.801497	142.651	672.323	0.84302	145.541	1062.4	0.915203	43.7097	345.146	0.761333	204.193	834.161	0.858296	106.954	926.919	0.791179	189.998	1203.72	0.870178	133.817	1088.86	0.753308	156.12	647.498	0.90616	42.779	729.847	0.895829	80.618	1004.5	0.572124	249.808	709.364	0.625647	267.812	767.241	0.60257	267.489	803.612	0.641536	322.823	994.46
Atp5l	0.682075	365.123	578.327	0.732168	472.308	931.059	0.917983	187.99	2926.96	0.958276	69.9356	952.715	0.754516	447.975	1475.49	0.938428	104.578	1338.97	0.805995	499.333	1584.17	0.797157	444.465	1379.65	0.512914	624.482	1136.22	0.926567	94.1139	795.178	0.929163	150.116	1454.91	0.436938	612.901	946.401	0.554487	641.453	1178.77	0.476703	639.002	1155.58	0.601643	698.227	1520.2
Atp5o	0.800173	149.996	435.286	0.854472	130.664	758.057	0.932659	78.8347	1725.06	0.925331	69.9356	1959.29	0.896613	89.5951	743.868	0.862326	133.099	1137.51	0.847388	155.453	1177.5	0.871402	126.649	1051.17	0.725072	202.189	828.53	0.873276	74.1503	609.704	0.885288	130.657	889.094	0.604523	263.751	622.709	0.666213	335.485	825.153	0.628515	375.759	884.522	0.698422	484.234	1122.05
Atp5s	0.982569	3.94727	135.292	0.986722	5.99376	232.786	0.966755	24.2568	719.607	0.949122	26.2258	354.019	0.984247	6.25082	327.59	0.988959	7.13029	593.112	0.976943	12.5618	748.981	0.985407	7.16878	291.597	0.990271	2.55935	97.7804	1	0	0	0.989713	5.55986	217.371	0.925007	12.7809	341.39	0.9548	12.2387	231.814	0.921483	21.2293	211.182	0.923027	24.4563	347.25
Atp5sl	0.941556	15.7891	802.193	0.92399	28.77	611.952	0.975066	18.1926	416.827	0.966081	17.4839	308.449	0.943867	25.0033	465.106	0.985279	9.50706	516.751	0.975931	10.9916	355.405	0.968382	15.5324	366.687	0.970814	7.67805	122.632	0.993142	2.85194	261.986	0.958852	22.2395	773.702	0.88006	21.4951	229.346	0.908697	27.3571	298.822	0.912486	23.3522	287.772	0.91429	29.3475	515.851
Atp6ap1	0.794449	88.8136	358.147	0.811331	86.3101	519.699	0.826561	157.669	877.225	0.826668	122.387	623.613	0.873465	58.341	568.552	0.720757	251.937	808.705	0.834262	127.189	725.246	0.843146	109.921	621.656	0.884994	46.0683	301.13	0.713594	205.339	613.716	0.730005	191.815	746.958	0.754386	62.1615	219.225	0.732165	89.9906	333.923	0.746989	97.6548	254.726	0.834905	91.711	431.484
Atp6ap2	0.653526	98.6818	456.688	0.755821	129.465	515.02	0.75227	285.018	1117.87	0.734068	148.613	632.288	0.856424	72.9262	1020	0.717838	256.691	965.913	0.845149	102.065	765.566	0.816845	138.596	780.618	0.714049	127.968	494.734	0.597464	313.713	728.945	0.691961	330.812	1175.82	0.621961	134.78	268.143	0.538196	192.22	577.46	0.678719	182.572	482.951	0.682624	195.65	685.768
Atp6v0a1	0.797868	63.1564	428.847	0.805731	91.1051	470.754	0.91944	66.7063	664.485	0.985631	17.4839	691.324	0.90867	41.6721	454.583	0.8775	97.4474	789.019	0.87087	76.9412	459.858	0.907262	62.1295	635.119	0.883328	43.509	313.269	0.835157	116.929	674.666	0.867145	86.1779	797.932	0.669622	99.3422	262.168	0.716413	102.949	362.326	0.739603	99.7777	391.83	0.85828	78.2601	390.095
Atp6v0a2	0.921562	17.7627	378.039	0.919389	28.77	601.689	0.991689	6.06421	889.68	1	0	0	0.942239	22.9197	482.327	0.923198	61.7959	627.115	0.957302	23.5534	431.226	0.954574	23.8959	567.966	0.980543	5.1187	76.8556	0.897131	42.779	621.227	0.974283	13.8997	218.724	0.890912	19.7522	162.304	0.928304	20.1579	339.107	0.901776	21.2293	204.166	0.9419	18.3422	380.19
Atp6v0b	0.594927	221.047	416.748	0.626192	278.11	872.956	0.738642	309.275	1146.77	0.726163	174.839	862.376	0.764212	152.103	797.123	0.757669	216.286	957.154	0.758238	255.947	894.249	0.80014	138.596	746.701	0.788841	87.0179	392.326	0.838918	105.522	826.142	0.764933	155.676	987.768	0.473493	296.284	514.687	0.538763	328.286	645.488	0.446423	271.735	624.416	0.61473	289.807	690.459
Atp6v0c	0.592572	418.411	981.152	0.702924	511.867	1060.67	0.862322	291.082	1115.22	0.81661	262.258	903.723	0.830372	281.287	1254.71	0.918603	173.504	1331.99	0.862806	273.22	1165.18	0.837051	234.18	1433.76	0.771556	238.02	583.604	0.892408	134.041	738.395	0.846924	244.634	1420.94	0.488445	532.149	858.887	0.521122	495.308	967.329	0.514635	505.257	934.94	0.634454	519.696	1136.38
Atp6v0d1	0.703493	96.7082	377.541	0.801784	107.888	498.551	0.966755	24.2568	330.78	0.983041	8.74195	369.14	0.84348	72.9262	664.058	0.933272	52.2888	691.089	0.870115	75.371	536.519	0.905014	51.3763	989.16	0.883256	30.7122	409.356	0.928444	37.0752	610.117	0.925902	47.2588	613.444	0.662277	105.733	261.815	0.721782	118.788	498.789	0.696005	129.499	384.521	0.744438	154.075	462.242
Atp6v0d2	0.956424	9.86818	735.469	0.915836	29.9688	431.072	0.950132	36.3852	459.342	1	0	0	0.991102	8.33443	264.459	1	0	0	0.981855	18.8427	465.694	0.990917	5.97399	1038.41	0.990271	2.55935	1203.37	1	0	0	1	0	0	1	0	0	0.996862	0.719925	575.043	1	0	0	1	0	0
Atp6v0e	0.678361	363.149	730.893	0.778274	384.799	776.445	0.778559	660.999	1574.68	0.671289	699.356	1843.53	0.842235	233.364	951.817	0.750185	703.522	2171.04	0.787373	554.291	1329.04	0.846024	286.751	1222.54	0.787619	227.782	634.758	0.804992	302.305	1090.63	0.748239	467.029	1789.18	0.448571	814.49	1123.29	0.494356	816.395	1246.24	0.510245	764.255	1167.93	0.595547	793.606	1547.9
Atp6v0e2	0.930278	15.7891	237.448	0.928895	23.975	337.27	0.950132	36.3852	696.951	0.949122	26.2258	883.416	0.978996	8.33443	184.891	0.964327	26.1444	454.179	0.975931	10.9916	243.13	0.952851	26.2855	610.88	0.931899	17.9155	271.894	0.972568	11.4077	296.397	0.980791	13.8997	512.133	0.865742	26.7236	239.092	0.910381	25.9173	292.018	0.905794	27.5981	464.988	0.945543	20.7878	343.24
Atp6v1a	0.861058	55.2618	238.937	0.831565	105.49	583.597	0.958444	30.321	734.583	0.939445	52.4517	500.746	0.927268	58.341	572.507	0.917644	59.4191	756.676	0.912042	72.2305	572.206	0.912384	53.7659	657.468	0.929106	28.1529	259.734	0.916404	45.631	445.884	0.966638	25.0194	445.68	0.655995	115.028	229.839	0.713562	122.387	399.034	0.754727	114.638	511.409	0.793095	101.494	475.074
Atp6v1b2	0.736502	122.365	242.406	0.773704	135.459	753.924	0.902863	78.8347	1337.4	0.955557	43.7097	470.05	0.870828	64.5918	364.781	0.894482	71.3029	727.952	0.859435	87.9328	640.887	0.903854	60.9347	680.929	0.864239	48.6277	377.133	0.913005	39.9271	349.971	0.92962	41.699	704.317	0.787337	49.9616	226.104	0.831528	50.3947	218.336	0.875686	42.4586	378.16	0.907012	37.9072	489.707
Atp6v1c1	0.711931	82.8927	492.049	0.823889	79.1176	449.391	0.91944	66.7063	1016.67	0.966081	17.4839	469.567	0.943867	25.0033	225.246	0.907649	68.9262	682.669	0.928911	34.545	743.292	0.934331	32.2595	821.082	0.902713	25.5935	201.787	0.951994	19.9636	874.676	0.961582	27.7993	423.729	0.72122	80.1709	279.929	0.802646	64.0733	271.993	0.781794	89.1631	253.245	0.874408	57.4722	587.633
Atp6v1c2	0.973854	5.92091	189.525	0.989334	3.59626	813.293	1	0	0	1	0	0	0.978996	8.33443	897.488	0.94229	40.405	796.699	0.930828	37.6855	709.796	0.944422	33.4543	521.746	0.898491	33.2716	275.436	0.926689	34.2232	715.589	0.979426	11.1197	722.984	0.985491	2.32379	94.2377	0.984312	3.59962	763.303	0.959622	8.49172	93.3487	0.974651	9.78251	429.996
Atp6v1d	0.628102	163.812	475.375	0.638369	239.75	726.427	0.811995	175.862	757.659	0.852515	87.4195	766.385	0.886792	72.9262	498.8	0.819757	149.736	820.332	0.823394	128.759	1004.69	0.849396	103.947	738.47	0.792672	122.849	513.356	0.82207	102.67	446.741	0.855072	119.537	987.815	0.551062	160.923	300.269	0.641116	184.301	509.263	0.632442	178.326	500.973	0.706299	195.65	575.464
Atp6v1e1	0.841254	104.603	492.402	0.786996	157.036	808.751	0.908452	97.0273	1271.54	0.889996	78.6775	667.075	0.843134	114.598	983.506	0.880257	92.6938	740.646	0.815837	155.453	1144.91	0.81115	130.233	1093.33	0.747511	110.052	685.167	0.908022	45.631	723.28	0.86953	91.7378	1041.47	0.66463	146.98	510.161	0.61623	203.739	580.659	0.619473	191.064	481.235	0.703379	216.438	742.37
Atp6v1f	0.787452	177.627	556.583	0.792795	298.489	740.641	0.923821	151.605	1283.08	0.971263	34.9678	2898.26	0.848315	181.274	1099.88	0.911536	97.4474	1177.24	0.804464	273.22	1107.89	0.841005	201.921	1096.06	0.758262	184.273	900.587	0.933869	51.3348	745.326	0.928758	77.8381	757.141	0.489973	389.235	693.772	0.588477	338.365	841.913	0.544934	396.988	918.239	0.605523	405.974	1008.01
Atp6v1g1	0.55589	850.637	1074.77	0.662662	843.921	1562.57	0.931443	151.605	2103.28	0.914718	113.645	1530.03	0.711245	739.68	1422.21	0.876126	256.691	1483.13	0.702484	901.311	2075.44	0.812966	451.633	1642.56	0.59087	588.651	1153.8	0.926108	88.41	1022.31	0.886817	216.835	1296.88	0.418499	841.794	1114.47	0.520776	752.321	1124.07	0.527552	719.673	1224.45	0.673272	584.505	1076.51
Atp6v1g3	0.976	7.89454	938.112	0.955075	22.7763	2457.91	0.96896	30.321	416.711	1	0	0	0.919347	235.448	1999.39	0.984148	21.3909	2156.71	0.860202	210.411	3474.06	0.931903	91.9994	2393.01	1	0	0	0.986284	5.70387	516.456	0.989713	5.55986	1787.67	1	0	0	1	0	0	0.972914	8.49172	525.683	0.99622	1.22281	619.579
Atp6v1h	0.844007	45.3936	238.573	0.900049	44.3538	520.944	0.93351	48.5137	1156.85	1	0	0	0.9139	39.5885	420.761	0.927585	49.9121	1036.65	0.927409	39.2557	765.138	0.955275	25.0907	594.011	0.92217	20.4748	116.746	0.940361	28.5194	264.578	0.948566	27.7993	577.813	0.818776	37.1807	170.241	0.83004	44.6353	448.367	0.851958	42.4586	336.469	0.885227	41.5757	275.467
Atp7a	0.78686	74.9982	253.503	0.869988	57.5401	576.585	0.983377	12.1284	1215.62	0.966081	17.4839	771.663	0.964787	16.6689	557.81	0.925959	57.0424	672.95	0.978276	15.7023	372.486	0.944422	33.4543	653.985	0.954062	15.3561	146.487	0.885615	51.3348	620.523	0.948566	27.7993	1022.61	0.962929	8.13328	198.014	0.9204	20.1579	231.458	0.92777	16.9834	294.298	0.973539	8.5597	197.03
Atp8a1	0.947708	11.8418	271.1	0.950227	16.7825	961.678	0.983377	12.1284	519.956	0.983041	8.74195	311.526	0.957992	16.6689	250.326	0.988959	7.13029	1624.19	0.993123	3.14046	1269.11	0.964962	20.3116	419.004	0.963667	12.7968	143.374	0.890794	59.8907	582.899	0.938317	47.2588	422.407	0.855965	32.5331	201.012	0.880757	33.8365	343.908	0.912486	23.3522	429.924	0.930487	26.9019	377.09
Atp8b1	0.956424	9.86818	176.784	0.957337	14.385	856.723	0.983377	12.1284	925.247	0.966081	17.4839	662.341	0.989498	4.16721	275.776	0.988959	7.13029	282.518	0.980357	10.9916	389.63	1	0	0	0.980543	5.1187	390.443	0.981115	11.4077	263.783	0.98457	8.3398	216.229	0.892794	20.9141	187.296	0.941401	14.3985	254.655	0.939454	16.9834	193.48	0.983095	4.89126	128.536
Atp8b2	0.991285	1.97364	106.963	0.976159	9.59001	414.178	0.991689	6.06421	234.412	1	0	0	0.968494	12.5016	485.29	0.97532	19.0141	602.517	0.975931	10.9916	205.376	0.977031	14.3376	330.068	0.980543	5.1187	85.2131	0.951994	19.9636	513.5	0.979426	11.1197	136.016	0.989118	1.74285	100.215	0.978037	5.03947	275.217	0.990971	2.12293	98.0873	0.99622	1.22281	728.332
Atp9a	0.752164	96.7082	260.221	0.828103	79.1176	370.245	0.927723	60.6421	1098.22	0.949122	26.2258	444.718	0.84772	60.4246	474.571	0.8391	128.345	766.398	0.90415	70.6603	423.792	0.931011	37.0387	505.797	0.938533	25.5935	220.104	0.858418	77.0023	506.898	0.898797	58.3786	742.11	0.775351	47.0568	128.051	0.817596	64.0733	288.703	0.854216	44.5815	187.717	0.889163	46.4669	291.842
Atp9b	0.934903	19.7364	285.944	0.961995	14.385	466.797	0.975066	18.1926	1303.01	0.983041	8.74195	187.196	0.954335	20.8361	412.735	0.937434	40.405	497.788	0.967529	18.8427	600.283	0.93476	38.2335	715.816	0.951357	12.7968	301.995	0.878765	54.1868	646.188	0.994857	2.77993	1189.06	0.922518	12.1999	134.452	0.944535	13.6786	214.335	0.939454	16.9834	175.465	0.989591	4.89126	258.157
Atpaf2	0.947708	11.8418	159.844	0.95585	17.9813	532.738	0.991689	6.06421	236.518	0.983041	8.74195	397.456	0.97108	16.6689	1182.4	0.966877	21.3909	840.39	0.980357	10.9916	146.441	0.982975	8.36358	399.845	0.97321	10.2374	424.848	0.972568	11.4077	763.596	0.98457	8.3398	351.124	0.871757	22.076	265.061	0.9204	20.1579	288.274	0.876455	33.9669	314.872	0.924398	25.6791	339.412
Atpif1	0.712149	345.386	594.311	0.71901	503.476	1291.02	0.901726	285.018	1784.77	0.943407	78.6775	1015.89	0.685524	595.912	1539.57	0.776188	560.916	1921.59	0.663439	1158.83	2455.38	0.751777	569.918	1925.04	0.495644	1013.5	1549.63	0.910397	128.337	768.431	0.863407	375.291	1693.38	0.198775	1676.04	2339.87	0.368796	1690.38	2246.02	0.310219	2004.05	2880.65	0.340327	2161.93	3038.6
Atr	0.982569	3.94727	271.954	0.969082	11.9875	640.974	1	0	0	0.983041	8.74195	564.016	0.989498	4.16721	1097.62	0.965243	28.5212	487.168	0.987159	7.85114	125.441	0.990271	4.77919	148.351	0.990271	2.55935	107.712	0.954011	22.8155	796.498	0.989713	5.55986	155.674	0.939502	10.4571	117.494	0.9602	10.7989	329.764	0.945827	12.7376	261.112	0.99244	2.44563	217.844
Atraid	0.755774	86.84	421.686	0.827163	93.5026	551.898	0.815393	187.99	791.48	0.722613	218.549	583.781	0.800148	122.933	878.242	0.659884	358.891	1031.12	0.744473	221.402	986.248	0.809964	151.739	731.836	0.699057	140.764	493.546	0.582234	310.861	692.382	0.678456	269.653	886.424	0.650322	94.6946	315.062	0.66026	149.024	409.852	0.733438	104.024	426.53	0.702438	151.629	524.159
Atrip	0.973854	5.92091	489.626	0.939561	20.3788	415.217	0.991689	6.06421	1402.52	0.983041	8.74195	187.196	0.963243	14.5852	359.607	0.978975	16.6374	1729.3	0.982808	7.85114	621.63	0.97811	10.7532	559.924	0.963667	12.7968	249.911	0.96571	14.2597	556.557	0.989713	5.55986	1910.59	0.907182	18.5904	169.998	0.904738	23.7575	335.621	0.915213	19.1064	301.876	0.95582	15.8966	351.122
Atrn	0.956424	9.86818	289.238	0.966425	14.385	303.964	0.958444	30.321	1085.66	0.966081	17.4839	882.969	0.975205	12.5016	950.544	0.952155	30.8979	497.482	0.982808	7.85114	432.283	0.985407	7.16878	481.571	1	0	0	0.979426	8.55581	196.235	0.974283	13.8997	511.377	0.953988	8.13328	114.143	0.965487	7.91917	383.733	0.981942	4.24586	91.1079	0.984879	4.89126	196.826
Atrx	0.579795	177.627	517.949	0.642143	195.397	818.479	0.859449	133.413	948.298	0.839838	104.903	467.13	0.699448	216.695	883.874	0.755051	237.676	749.745	0.806828	163.304	740.335	0.800262	164.882	767.434	0.793443	76.7805	372.576	0.704298	199.636	905.155	0.793434	166.796	884.717	0.682293	102.247	216.213	0.644336	174.222	486.822	0.729195	140.113	475.421	0.795148	127.173	538.386
Atxn1	0.896973	35.5255	269.556	0.911245	41.9563	504.903	0.966755	24.2568	796.319	1	0	0	0.981251	12.5016	991.755	1	0	0	0.993123	3.14046	141.33	0.980543	9.55838	285.809	0.97321	10.2374	168.503	0.945137	22.8155	387.066	0.963996	19.4595	412.021	0.934711	11.038	152.232	0.956075	10.0789	301.223	0.936798	14.8605	254.197	0.98866	3.66844	139.47
Atxn10	0.841984	43.42	267.73	0.905499	39.5588	396.202	0.958444	30.321	1144.18	0.983041	8.74195	1097.69	0.899579	47.923	659.819	0.927585	49.9121	743.061	0.909386	53.3878	883.59	0.894245	59.7399	801.216	0.847013	56.3057	319.039	0.91893	51.3348	497.127	0.915665	52.8187	516.735	0.786084	45.314	307.265	0.816451	68.3929	281.671	0.726509	97.6548	365.196	0.834905	91.711	459.702
Atxn1l	0.991285	1.97364	91.5248	0.960892	13.1863	355.199	1	0	0	1	0	0	0.978996	8.33443	243.165	0.970557	19.0141	551.993	0.972493	12.5618	662.432	0.971574	15.5324	858.325	0.990271	2.55935	150.038	0.945137	22.8155	794.208	0.989713	5.55986	980.353	0.86657	27.8855	234.585	0.89868	28.797	425.53	0.963885	8.49172	605.125	0.969759	9.78251	350.087
Atxn2	0.891771	29.6045	184.871	0.874221	57.5401	469.248	0.944265	48.5137	588.122	0.983041	8.74195	225.785	0.934791	31.2541	421.227	0.924771	66.5494	510.619	0.93766	34.545	649.95	0.938305	39.4283	546.733	0.944422	17.9155	169.867	0.923164	42.779	440.881	0.955271	27.7993	522.909	0.842285	29.0474	157.292	0.890861	28.797	239.735	0.918741	19.1064	231.749	0.958418	13.451	328.443
Atxn2l	0.880002	39.4727	204.468	0.908168	37.1613	327.97	0.950132	36.3852	774.876	0.983041	8.74195	361.925	0.873975	50.0066	363.916	0.935989	47.5353	537.164	0.940198	31.4046	402.924	0.942423	29.8699	442.076	0.883256	30.7122	232.216	0.96571	14.2597	276.333	0.958852	22.2395	521.97	0.828728	35.4379	171.84	0.887683	38.156	233.859	0.916581	29.721	137.036	0.969759	11.0053	451.883
Atxn3	0.984441	5.92091	204.608	0.972623	10.7888	458.521	0.991689	6.06421	700.28	1	0	0	0.968494	12.5016	474.229	0.992639	4.75353	235.108	0.986247	6.28091	405.842	0.990271	4.77919	813.711	0.990271	2.55935	2531.65	0.993142	2.85194	796.178	0.974283	13.8997	1370.09	0.919815	15.1047	251.732	0.939178	15.8383	274.868	0.909712	21.2293	400.545	0.944501	20.7878	317.933
Atxn7	0.893979	47.3673	405.155	0.913053	45.5526	441.369	0.966755	24.2568	414	0.983041	8.74195	749.064	0.936987	25.0033	343.034	0.930073	45.1585	466.196	0.939216	29.8343	265.233	0.943813	32.2595	410.379	0.961085	10.2374	255.297	0.911035	51.3348	491.631	0.961582	27.7993	379.374	0.852411	33.695	150.306	0.860018	44.6353	263.032	0.873597	33.9669	241.658	0.964301	14.6738	163.206
Atxn7l1	1	0	0	0.99289	2.3975	94.5176	1	0	0	1	0	0	0.989498	4.16721	281.618	1	0	0	0.996562	1.57023	87.804	1	0	0	0.990271	2.55935	163.854	1	0	0	1	0	0	0.941965	9.29518	93.1956	0.971762	6.47932	164.821	0.936798	14.8605	747.32	0.99244	2.44563	247.15
Atxn7l3	0.973854	5.92091	160.775	0.919389	28.77	421.368	0.991689	6.06421	203.128	0.983041	8.74195	1201.92	0.966823	20.8361	236.678	0.95795	33.2747	584.236	0.965616	15.7023	298.82	0.982975	8.36358	316.941	0.931899	17.9155	168.814	0.993142	2.85194	391.083	0.990817	8.3398	1513.55	0.934236	12.7809	128.447	0.942379	12.9586	374.466	0.972914	6.36879	171.103	0.984879	4.89126	173.446
Atxn7l3b	0.69489	130.26	581.573	0.684739	196.595	641.152	0.916887	60.6421	917.05	0.835615	96.1614	687.48	0.702198	227.113	673.148	0.849542	133.099	749.136	0.822679	153.882	721.957	0.807793	144.57	777.053	0.69023	171.477	501.665	0.838087	85.5581	677.623	0.85308	133.437	816.268	0.509106	254.455	524.128	0.585887	227.496	502.749	0.646853	233.522	477.076	0.683751	198.096	687.996
AU019823	0.906834	23.6836	477.793	0.959379	16.7825	381.297	1	0	0	0.983041	8.74195	952.381	0.943867	25.0033	242.277	0.959516	26.1444	677.787	0.930828	37.6855	474.256	0.974	14.3376	352.603	0.954062	15.3561	243.514	0.979426	8.55581	207.973	0.974283	13.8997	692.458	0.867562	24.9808	150.017	0.853496	41.7556	303.037	0.891655	27.5981	379.683	0.929398	25.6791	223.5
AU022252	0.984441	5.92091	627.188	0.989334	3.59626	190.062	1	0	0	1	0	0	0.989498	4.16721	1350.7	0.988959	7.13029	612.352	0.97937	9.42137	731.021	0.990271	4.77919	982.876	0.980543	5.1187	159.603	1	0	0	1	0	0	0.940526	11.038	201.101	0.940387	14.3985	222.041	0.981942	4.24586	106.721	0.96336	13.451	276.266
AU040320	0.956424	9.86818	144.688	0.924942	29.9688	380.549	0.93351	48.5137	1120.67	0.932162	34.9678	441.324	0.926485	29.1705	374.038	0.907991	59.4191	543.637	0.961477	23.5534	614.808	0.954574	23.8959	470.28	0.951357	12.7968	116.976	0.917756	48.4829	651.489	0.92962	41.699	548.155	0.863065	31.3712	257.207	0.893986	28.797	329.788	0.92777	16.9834	239.457	0.930149	33.016	224.58
AU041133	0.982569	3.94727	77.0678	0.978669	7.19251	611.296	1	0	0	1	0	0	0.973745	10.418	433.37	0.981598	11.8838	968.014	0.997087	3.14046	4073.32	0.990271	4.77919	154.881	0.990271	2.55935	577.367	1	0	0	0.989713	5.55986	585.276	0.917758	14.5237	219.443	0.959212	9.35902	315.963	0.92777	16.9834	170.265	0.981099	6.11407	503.483
Auh	0.898141	25.6573	169.843	0.957337	14.385	449.668	0.977113	24.2568	708.651	1	0	0	0.938629	27.0869	416.921	0.982622	14.2606	842.022	0.948425	23.5534	1189.73	0.984224	10.7532	576.888	0.93476	20.4748	248.958	0.986284	5.70387	652.742	0.994857	2.77993	190.84	0.839542	36.5998	292.786	0.912721	23.7575	279.731	0.842966	46.7045	293.181	0.892904	45.2441	359.602
Aup1	0.825694	39.4727	225.001	0.895756	44.3538	631.407	0.93351	48.5137	1227.17	0.932162	34.9678	538.951	0.843113	83.3443	515.961	0.931276	59.4191	728.883	0.916877	51.8175	584.456	0.935397	46.5971	617.291	0.840482	48.6277	384.783	0.911035	51.3348	401.937	0.969139	16.6796	919.642	0.702125	80.7518	280.94	0.762558	72.7124	228.737	0.840389	42.4586	375.498	0.88781	51.3582	417.887
Aurkaip1	0.821854	55.2618	307.646	0.88786	45.5526	431.399	0.983377	12.1284	1394.79	0.966081	17.4839	1510.35	0.864366	64.5918	669.919	0.924985	54.6656	810.737	0.889751	64.3794	826.023	0.91055	50.1815	669.396	0.791578	92.1366	393.387	0.94719	25.6674	333.961	0.910542	55.5986	510.355	0.504582	169.637	393.323	0.66083	159.103	470.162	0.591922	193.187	411.889	0.649639	204.21	660.332
Auts2	0.973854	5.92091	105.635	0.953879	21.5775	285.781	0.966755	24.2568	572.696	1	0	0	0.943867	25.0033	351.341	0.967994	23.7676	650.903	0.952951	23.5534	503.283	0.978849	11.948	379.739	0.970814	7.67805	138.074	0.979426	8.55581	546.367	0.994857	2.77993	1620.75	0.990781	3.48569	164.116	1	0	0	1	0	0	1	0	0
Avl9	0.906834	23.6836	179.94	0.896619	39.5588	433.881	0.950132	36.3852	852.648	0.949122	26.2258	219.573	0.9139	39.5885	339.686	0.816919	154.49	688.902	0.869138	92.6435	565.22	0.934124	37.0387	595.645	0.911769	35.8309	304.559	0.859819	79.8542	373.22	0.951426	33.3592	589.727	0.846583	40.0854	186.254	0.878481	39.5959	244.979	0.840388	44.5815	308.138	0.916037	37.9072	320.502
Avpi1	0.632772	153.944	426.309	0.758723	127.068	554.764	0.935998	54.5779	1063.79	0.886271	69.9356	763.727	0.810095	104.18	520.02	0.860125	111.708	1041.63	0.783263	158.593	730.931	0.843147	108.727	650.853	0.705014	156.12	510.97	0.863682	71.2984	690.192	0.85924	83.398	1136.25	0.700009	88.3042	326.675	0.74729	102.949	440.71	0.701568	93.4089	538.821	0.800444	97.8251	540.546
AW146154	0.956424	9.86818	122.444	0.975113	8.39126	523.488	0.966755	24.2568	504.147	1	0	0	0.989498	4.16721	155.417	0.988959	7.13029	1331.68	0.981063	12.5618	572.146	0.987839	5.97399	633.782	0.970814	7.67805	673.149	0.993142	2.85194	248.694	0.994857	2.77993	475.059	0.956474	6.97138	120.969	0.959212	9.35902	170.179	0.960248	16.9834	335.879	0.984879	4.89126	355.964
AW209491	0.965139	7.89454	499.007	0.968003	10.7888	390.6	0.991689	6.06421	686.813	1	0	0	0.963243	14.5852	645.079	0.992639	4.75353	233.086	0.989685	4.71069	841.053	0.988515	7.16878	955.506	0.970814	7.67805	105.794	1	0	0	0.979426	11.1197	260.606	0.945028	11.038	387.278	0.959212	9.35902	362.249	0.939454	16.9834	405.002	0.977319	7.33688	615.345
AW549877	0.915524	21.71	185.897	0.912283	31.1675	459.359	1	0	0	0.983041	8.74195	410.509	0.934791	31.2541	475.807	0.948475	33.2747	699.674	0.966673	17.2725	492.565	0.951357	23.8959	616.593	0.951357	12.7968	241.894	0.945137	22.8155	671.392	0.957509	33.3592	1306.53	0.907976	16.2666	159.847	0.942305	15.1184	222.313	0.92777	16.9834	193.365	0.959591	14.6738	122.668
Axin1	0.941556	15.7891	333.701	0.957337	14.385	488.4	0.977113	24.2568	1644.94	0.983041	8.74195	372.301	0.952741	18.7525	369.044	0.964327	26.1444	488.909	0.963244	18.8427	389.136	0.970814	14.3376	283.404	0.92217	20.4748	338.645	0.96571	14.2597	403.53	0.994857	2.77993	1096.49	0.950368	8.71423	198.226	0.943525	12.9586	147.32	0.972914	6.36879	119.645	0.99622	1.22281	96.9368
Axin2	0.973854	5.92091	91.2854	0.93554	26.3725	487.243	0.925199	54.5779	481.397	1	0	0	0.952741	18.7525	302.446	0.970557	19.0141	848.694	0.973523	14.1321	315.691	0.969147	16.7272	514.029	0.990271	2.55935	83.3333	0.99419	5.70387	246.488	0.989713	5.55986	134.686	1	0	0	0.996862	0.719925	565.611	1	0	0	0.99622	1.22281	314.367
AY761185	0.92176	114.471	3911.15	0.833766	414.768	5752.87	0.60019	6179.43	10898.4	0	63169.3	58674.8	0.00121578	33006.4	29366.3	0.256472	10662.2	13347.8	0.176052	17266.2	18013.6	0.801407	553.191	2403.58	0.661419	345.512	1547.16	0.781008	410.679	1300.74	0.864206	289.113	4660.19	1	0	0	0.993725	1.43985	644.667	1	0	0	1	0	0
Azi2	0.900423	27.6309	286.99	0.872731	55.1426	435.001	0.975066	18.1926	676.544	1	0	0	0.881218	60.4246	434.303	0.879012	116.461	712.683	0.901958	64.3794	688.994	0.906354	53.7659	593.67	0.839259	61.4244	196.225	0.894478	68.4465	572.325	0.893658	61.1585	694.88	0.738474	67.39	205.574	0.835818	60.4737	261.224	0.856225	44.5815	286.972	0.849957	77.0373	622.01
Azin1	0.795292	73.0245	435.585	0.750131	125.869	631.554	0.890482	103.092	1078.32	0.894763	113.645	659.253	0.793543	108.348	857.555	0.781505	247.184	815.16	0.778276	180.576	910.599	0.746226	221.038	915.488	0.712097	181.714	644.055	0.601767	390.715	969.406	0.626397	394.75	1114.56	0.498848	446.168	678.928	0.460939	483.07	925.916	0.526372	399.111	879.152	0.653025	348.502	1055.49
B230118H07Rik	0.92096	27.6309	222.979	0.916897	31.1675	264.468	0.96896	30.321	798.469	1	0	0	0.975205	12.5016	648.373	0.974238	16.6374	640.489	0.965616	15.7023	328.849	0.958653	20.3116	592.459	0.883256	30.7122	231.754	0.96571	14.2597	407.193	0.950146	30.5793	1496.96	0.733373	58.6758	287.811	0.841798	45.3553	388.442	0.804305	48.8274	321.988	0.871313	53.8038	581.207
B230219D22Rik	0.862948	43.42	276.787	0.853946	65.9314	420.164	0.935998	54.5779	680.506	0.949122	26.2258	477.575	0.840834	79.1771	591.747	0.857308	104.578	847.296	0.874973	76.9412	477.061	0.9317	38.2335	492.051	0.875535	48.6277	603.903	0.885615	51.3348	514.497	0.924155	55.5986	1428.16	0.731027	72.0376	279.066	0.785431	79.1917	321.432	0.821463	70.0567	597.97	0.842481	72.146	531.002
B2m	0.313156	1926.27	2847.03	0.511997	1353.39	2289.84	0.46258	2704.64	3803.76	0.21961	4773.1	5001.81	0.50161	1454.36	3044.38	0.125152	10505.3	11123.3	0.318858	5549.19	7826.62	0.23217	9226.23	11767.7	0.0500184	8044.04	7723.97	0.0150521	25188.3	23856.9	0.10051	20941.2	20656.5	0.264096	3768.61	4329.57	0.177456	6703.22	8174.66	0.182426	4676.82	5315.48	0.239847	5993.01	6900.71
B3galnt2	0.938993	13.8155	259.786	0.947803	19.18	497.283	0.975066	18.1926	579.825	1	0	0	0.980389	10.418	339.754	0.956986	30.8979	631.301	0.976943	12.5618	188.742	0.97811	10.7532	419.657	0.970814	7.67805	159.599	0.954011	22.8155	251.283	0.975713	16.6796	404.472	0.975676	4.64759	109.578	0.952937	10.7989	167.378	0.990971	2.12293	1468.43	0.98866	3.66844	118.99
B3galt2	1	0	0	1	0	0	1	0	0	1	0	0	0.994749	2.08361	1851.85	0.864614	111.708	806.482	0.903335	58.0985	1008.03	0.952187	31.0647	486.406	0.941628	15.3561	185.961	0.936638	37.0752	455.4	0.974283	13.8997	360.244	0.996373	0.580948	2347.42	1	0	0	1	0	0	1	0	0
B3galt6	0.991285	1.97364	88.3392	0.961995	14.385	290.388	0.93351	48.5137	942.635	1	0	0	0.980389	10.418	502.927	0.977918	14.2606	1001.51	0.965616	15.7023	630.192	0.988515	7.16878	1035.19	0.961085	10.2374	355.276	0.958852	17.1116	726.118	0.985836	11.1197	189.56	0.9333	12.1999	115.44	0.95792	11.5188	325.569	0.939454	16.9834	248.279	0.959508	22.0106	299.606
B3gat3	0.886701	25.6573	319.263	0.937785	29.9688	384.717	0.975066	18.1926	1443.72	0.903114	61.1936	710.579	0.934791	31.2541	371.419	0.937434	40.405	674.596	0.926489	37.6855	710.228	0.957004	22.7012	497.831	0.944422	17.9155	172.851	0.931421	28.5194	574.067	0.948566	27.7993	1017.69	0.854952	29.0474	170.66	0.875227	32.3966	258.318	0.864568	31.844	201.441	0.937543	29.3475	351.395
B3gnt2	0.976	7.89454	182.98	0.98042	9.59001	441.166	0.991689	6.06421	2469.14	1	0	0	0.989498	4.16721	978.342	0.963196	23.7676	940.103	0.972493	12.5618	422.939	0.985407	7.16878	459.901	0.951357	12.7968	640.56	0.903989	39.9271	443.144	0.965508	22.2395	569.697	0.909449	20.3332	180.052	0.911894	23.7575	405.016	0.875686	44.5815	300.356	0.961366	17.1194	509.167
B3gnt7	0.956424	9.86818	192.039	0.985779	4.79501	490.648	1	0	0	1	0	0	1	0	0	1	0	0	0.993123	3.14046	477.202	1	0	0	0.963667	12.7968	404.421	0.986284	5.70387	1941.61	0.92962	41.699	432.967	0.858344	25.5617	217.554	0.869826	34.5564	253.235	0.824971	48.8274	416.521	0.914491	35.4616	570.017
B3gntl1	1	0	0	0.983212	7.19251	208.284	1	0	0	0.983041	8.74195	1307.19	0.98554	8.33443	306.775	0.988959	7.13029	488.991	0.993123	3.14046	676.837	0.987839	5.97399	436.162	0.990271	2.55935	805.802	0.993142	2.85194	323.311	1	0	0	0.985491	2.32379	180.233	0.978037	5.03947	463.522	0.936798	14.8605	291.703	0.98866	3.66844	115.367
B4galnt1	0.753001	82.8927	444.063	0.81739	98.2977	514.284	0.916887	60.6421	832.758	0.881284	61.1936	545.291	0.9556	22.9197	479.774	0.981598	11.8838	1404.59	0.982808	7.85114	1135.1	0.990271	4.77919	1516.4	0.990271	2.55935	123.778	1	0	0	0.989713	5.55986	101.627	1	0	0	1	0	0	1	0	0	1	0	0
B4galnt2	0.778926	65.13	300.652	0.910556	40.7576	409.615	0.96896	30.321	785.352	0.966081	17.4839	258.283	0.989498	4.16721	102.891	1	0	0	1	0	0	1	0	0	1	0	0	1	0	0	1	0	0	1	0	0	1	0	0	1	0	0	1	0	0
B4galt1	0.889444	27.6309	394.421	0.850888	75.5214	425.436	0.825463	127.348	702.522	0.886271	69.9356	683.76	0.850006	100.013	613.858	0.978975	16.6374	864.592	0.958301	40.8259	1013.26	0.982975	8.36358	331.893	0.947895	23.0342	129.349	0.951994	19.9636	226.889	0.934754	38.9191	751.318	0.759678	74.9424	225.589	0.794695	84.2312	346.792	0.884489	40.3357	287.362	0.887325	44.0213	515.613
B4galt3	0.938993	13.8155	246.581	0.910789	34.7638	272.945	0.958444	30.321	1144.13	0.932162	34.9678	676.072	0.933389	29.1705	422.657	0.919032	52.2888	694.377	0.942651	28.2641	219.637	0.93476	38.2335	709.938	0.910114	33.2716	269.509	0.933527	31.3713	519.936	0.939886	36.1391	639.659	0.802628	49.3806	251.572	0.853208	44.6353	221.452	0.873597	33.9669	289.233	0.924398	25.6791	234.403
B4galt4	0.898276	37.4991	463.029	0.892236	45.5526	312.74	0.891954	78.8347	969.487	0.932162	34.9678	765.936	0.90047	62.5082	493.58	0.956986	30.8979	1084.26	0.959814	20.413	926.053	0.974	14.3376	785.605	0.982632	7.67805	107.473	0.96571	14.2597	406.479	0.953709	25.0194	385.331	0.792492	47.0568	239.883	0.842542	41.7556	274.592	0.833162	57.3191	347.718	0.902622	46.4669	576.793
B4galt5	0.914974	33.5518	416.13	0.920334	35.9626	325.778	0.991689	6.06421	274.801	1	0	0	1	0	0	0.99632	2.37676	171.321	0.989685	4.71069	256.158	0.997568	1.1948	113.482	1	0	0	1	0	0	1	0	0	0.962154	7.55233	196.293	0.971762	7.19925	313.936	1	0	0	0.989591	4.89126	201.166
B4galt6	1	0	0	1	0	0	1	0	0	1	0	0	1	0	0	1	0	0	1	0	0	1	0	0	0.990271	2.55935	70.3779	1	0	0	0.985836	11.1197	346.614	0.789782	56.933	186.23	0.86618	42.4756	304.293	0.884489	42.4586	169.552	0.914491	36.6844	354.2
B4galt7	0.938993	13.8155	199.804	0.961995	14.385	540.138	0.975066	18.1926	209.478	0.966081	17.4839	716.142	0.947489	20.8361	420.534	0.945966	38.0282	761.808	0.975931	10.9916	560.259	0.971574	15.5324	687.841	0.961085	10.2374	362.217	0.979426	8.55581	453.565	0.958852	22.2395	476.98	0.917951	16.8475	318.84	0.931996	16.5583	168.674	0.942035	12.7376	151.791	0.95681	17.1194	323.874
B630005N14Rik	0.88694	35.5255	271.76	0.915836	29.9688	415.282	0.991689	6.06421	289.101	0.983041	8.74195	1035.2	0.947489	20.8361	337.326	0.936925	49.9121	571.661	0.949518	25.1237	940.803	0.945978	37.0387	476.366	0.936897	23.0342	120.277	0.935235	34.2232	785.66	0.98457	8.3398	1559.47	0.932255	11.619	108.125	0.945431	14.3985	385.376	0.984701	8.49172	197.213	0.974651	9.78251	455.093
B930041F14Rik	0.956424	9.86818	306.86	0.951352	17.9813	339.093	0.991689	6.06421	236.518	1	0	0	0.98554	8.33443	443.862	0.99632	2.37676	283.607	0.996562	1.57023	155.545	0.971248	21.5064	764.354	0.970814	7.67805	1807.73	0.96571	14.2597	521.449	0.974283	13.8997	977.891	0.951488	7.55233	114.379	0.975839	6.47932	147.682	0.954856	10.6147	267.949	0.983095	4.89126	175.923
B9d1	0.982569	3.94727	71.4283	0.921785	26.3725	392.335	0.935998	54.5779	834.921	0.949122	26.2258	406.22	0.984247	6.25082	697.425	0.966877	21.3909	902.91	0.97937	9.42137	595.261	0.962542	21.5064	746.957	0.912442	23.0342	418.307	0.972568	11.4077	215.363	0.969139	16.6796	940.658	0.907976	16.8475	272.245	0.919713	23.0376	355.926	0.916581	27.5981	202.243	0.958418	13.451	303.043
B9d2	0.924209	19.7364	396.914	0.931079	26.3725	331.492	0.991689	6.06421	1166.86	1	0	0	0.963243	14.5852	230.817	0.981598	11.8838	941.381	0.97937	9.42137	358.792	0.976425	13.1428	471.308	0.927333	25.5935	397.309	0.979426	8.55581	237.857	0.974283	13.8997	913.587	0.925007	13.3618	219.529	0.964152	10.0789	532.134	0.939454	16.9834	106.288	0.96336	13.451	378.918
Babam1	0.941556	15.7891	196.216	0.916831	37.1613	404.882	0.983377	12.1284	892.836	0.966081	17.4839	222.614	0.954335	20.8361	351.105	0.954296	35.6515	804.557	0.948425	23.5534	384.093	0.928582	38.2335	573.773	0.886297	33.2716	203.484	0.979426	8.55581	289.287	0.950146	30.5793	473.188	0.601257	111.542	316.094	0.79066	71.9925	374.615	0.782432	59.4421	369.96	0.840187	68.4776	595.808
Bace1	0.982569	3.94727	695.08	0.971558	9.59001	215.713	0.975066	18.1926	1021.58	0.983041	8.74195	252.08	1	0	0	1	0	0	0.996562	1.57023	118.779	0.985407	7.16878	1139.62	0.990271	2.55935	646.412	0.979426	8.55581	427.517	0.989713	5.55986	1640.65	0.985491	2.32379	93.3913	0.96646	8.6391	169.959	0.981942	4.24586	210.58	0.981099	6.11407	262.237
Bach1	0.947708	11.8418	120.749	0.93285	28.77	639.603	0.991689	6.06421	686.342	0.983041	8.74195	1035.2	0.936987	25.0033	189.017	0.898161	68.9262	569.538	0.918708	56.5282	557.029	0.957698	23.8959	538.243	0.919629	30.7122	193.111	0.931145	42.779	583.173	0.918095	58.3786	898.736	0.953988	8.13328	322.395	0.96235	8.6391	391.121	0.981942	4.24586	102.626	0.99622	1.22281	346.861
Bad	0.848418	39.4727	455.291	0.915357	41.9563	431.191	0.975066	18.1926	641.972	0.983041	8.74195	361.925	0.870749	77.0935	579.695	0.94698	40.405	929.355	0.916198	42.3962	534.163	0.937762	38.2335	513.769	0.879623	56.3057	228.529	0.945137	22.8155	561.816	0.958852	22.2395	917.447	0.646273	90.047	247.543	0.762213	81.3515	337.612	0.704653	108.269	501.021	0.83059	73.3688	515.485
Bag1	0.835112	78.9454	399.728	0.735837	238.552	752.23	0.858708	103.092	1111.45	0.966081	17.4839	550.708	0.755051	177.107	649.334	0.882973	87.9403	790.169	0.825468	168.014	1032.94	0.860179	102.753	746.366	0.733772	125.408	465.873	0.910847	37.0752	457.397	0.872099	119.537	936.285	0.261311	874.327	1134.24	0.445779	551.462	943.416	0.351909	613.527	1108.82	0.491827	615.075	1264.33
Bag2	0.924209	19.7364	608.804	0.941259	28.77	278.421	0.991689	6.06421	1733.1	1	0	0	0.964787	16.6689	490.384	0.931993	61.7959	1002.67	0.898375	56.5282	1114.2	0.931011	37.0387	769.185	0.873527	33.2716	396.446	0.926689	34.2232	519.496	0.943422	30.5793	671.918	0.774566	46.4759	264.34	0.819202	48.9549	409.495	0.869802	50.9503	382.005	0.892903	45.2441	720.714
Bag3	0.875526	47.3673	451.529	0.828607	73.1239	456.073	0.93351	48.5137	769.83	0.949122	26.2258	1144.67	0.924352	35.4213	295.092	0.912247	68.9262	799.859	0.903648	69.0901	705.533	0.909974	54.9607	510.032	0.837467	58.8651	647.563	0.929909	39.9271	783.747	0.92962	41.699	974.091	0.768967	52.8663	162.079	0.819921	58.3139	399.952	0.797683	65.8108	222.856	0.884097	51.3582	523.067
Bag4	0.930278	15.7891	181.667	0.899155	37.1613	411.746	0.966755	24.2568	706.827	1	0	0	0.943867	25.0033	292.517	0.961599	30.8979	409.007	0.959814	20.413	528.025	0.97275	17.922	217.651	0.970814	7.67805	684.476	0.972568	11.4077	263.359	0.979426	11.1197	200.023	0.940526	11.038	142.547	0.937634	17.9981	342.727	0.954856	10.6147	205.897	0.968037	13.451	256.814
Bag5	0.934903	19.7364	134.759	0.928476	28.77	425.604	0.991689	6.06421	353.107	1	0	0	0.954335	20.8361	556.284	0.981598	11.8838	694.987	0.955301	20.413	660.446	0.963517	17.922	600.16	0.970814	7.67805	1141.67	0.979426	8.55581	464.241	0.98457	8.3398	763.252	0.861268	27.3046	213.788	0.881482	31.6767	377.989	0.849407	38.2127	315.654	0.916725	39.13	372.667
Bag6	0.883112	31.5782	214.561	0.908415	44.3538	475.783	0.958444	30.321	535.468	0.949122	26.2258	887.218	0.912417	37.5049	517.31	0.901279	76.0565	741.475	0.915419	48.6771	469.291	0.931011	37.0387	427.708	0.891	38.3903	297.272	0.903989	39.9271	654.266	0.924155	58.3786	518.616	0.803946	42.9902	204.212	0.868913	46.0752	265.038	0.828866	65.8108	428.127	0.945543	20.7878	495.457
Bahd1	0.968881	11.8418	207.154	0.950227	16.7825	529.449	0.991689	6.06421	203.128	0.983041	8.74195	1470.59	0.95041	25.0033	260.365	0.938615	42.7818	607.361	0.964859	21.9832	623.34	0.960729	23.8959	620.211	0.91774	28.1529	391.25	0.954011	22.8155	326.615	0.985836	11.1197	456.228	0.965746	6.97138	109.037	0.963331	9.35902	131.942	0.972914	6.36879	155.013	0.98866	3.66844	123.435
Baiap2	0.812802	124.339	540.865	0.732778	184.608	848.909	0.814017	151.605	1317.4	0.864813	122.387	1290.9	0.702473	289.621	946.525	0.898653	95.0706	815.467	0.902224	76.9412	739.952	0.860398	112.311	704.084	0.835623	74.2212	367.898	0.853077	82.7061	571.42	0.910878	72.2782	653.535	0.888274	21.4951	168.467	0.929028	20.8778	438.87	0.930473	21.2293	420.509	0.968037	13.451	148.708
Baiap2l1	0.965139	7.89454	526.304	0.950227	16.7825	331.136	1	0	0	0.983041	8.74195	2057.61	0.926485	29.1705	334.038	0.919032	52.2888	595.873	0.925371	53.3878	639.236	0.954574	23.8959	542.446	0.91774	28.1529	247.25	0.921644	39.9271	595.39	0.948566	27.7993	327.535	0.714103	85.9804	210.635	0.779807	71.9925	327.701	0.780535	87.0401	287.005	0.855536	72.146	474.288
Bak1	0.982569	3.94727	1160.83	0.989334	3.59626	91.6052	0.991689	6.06421	274.801	1	0	0	0.973745	10.418	610.545	0.99632	2.37676	898.473	0.993123	3.14046	347.46	0.995136	2.38959	490.52	0.990271	2.55935	124.719	1	0	0	0.994857	2.77993	362.056	0.893493	19.1713	137.23	0.953936	12.2387	150.453	0.96628	10.6147	163.409	0.98866	3.66844	486.764
Bambi	0.917694	23.6836	672.302	0.948782	20.3788	342.284	0.935998	54.5779	547.27	0.985631	17.4839	1131.22	0.966823	20.8361	332.678	0.99632	2.37676	408.497	0.972493	12.5618	494.899	0.98369	9.55838	1450.15	0.980543	5.1187	197.699	0.993142	2.85194	159.566	0.979426	11.1197	694.329	0.984052	5.22854	440.31	0.971993	11.5188	795.663	0.954856	10.6147	729.27	0.99244	2.44563	978.559
Banf1	0.778926	65.13	462.989	0.818854	77.9189	579.675	0.958444	30.321	353.486	0.949122	26.2258	1127.74	0.861614	70.8426	579.049	0.937762	52.2888	645.527	0.84968	84.7923	826.728	0.906718	48.9867	768.129	0.811403	56.3057	350.002	0.924461	45.631	808.945	0.945017	33.3592	1114.97	0.602749	140.009	370.82	0.658309	145.425	418.219	0.641209	154.974	425.351	0.718946	133.287	519.684
Banp	0.956424	9.86818	141.199	0.953782	15.5838	345.369	0.983377	12.1284	1110.04	0.966081	17.4839	408.845	0.963243	14.5852	406.203	0.952155	30.8979	553.462	0.932407	40.8259	542.075	0.935352	39.4283	425.08	0.931899	17.9155	135.001	0.938279	25.6674	467.728	0.966638	25.0194	657.368	0.956474	6.97138	128.513	0.943843	16.5583	373.863	0.981942	4.24586	679.694	0.965979	11.0053	303.824
Bap1	0.938993	13.8155	169.521	0.93715	22.7763	381.791	0.975066	18.1926	736.868	1	0	0	0.940004	29.1705	625.505	0.968881	26.1444	774.004	0.959814	20.413	268.901	0.962542	21.5064	581.428	0.980543	5.1187	142.282	0.938279	25.6674	521.364	0.989713	5.55986	568.108	0.952205	10.4571	226.294	0.9498	11.5188	412.961	0.972914	6.36879	318.507	0.961366	17.1194	377.49
Basp1	0.64674	309.861	740.147	0.654125	372.812	876.347	0.867651	127.348	992.506	0.829723	131.129	711.523	0.635064	433.39	909.802	0.727	259.067	1020.58	0.672156	505.614	1171.46	0.75049	301.089	1176.26	0.529018	389.021	882.746	0.716836	154.005	678.383	0.755319	305.793	1230.95	0.399639	594.891	825.782	0.437814	615.536	979.899	0.389073	636.879	908.811	0.535306	520.919	1000.15
Batf3	0.991285	1.97364	123.518	0.989334	3.59626	397.926	1	0	0	1	0	0	0.989498	4.16721	209.457	1	0	0	1	0	0	0.990271	4.77919	756.678	0.990271	2.55935	579.039	1	0	0	1	0	0	0.954957	8.71423	107.53	0.9749	5.7594	177.927	0.96628	10.6147	416.314	0.984879	4.89126	109.397
Bax	0.782427	69.0773	266.722	0.793006	115.08	470.247	0.863723	115.22	1107.27	0.898243	52.4517	949.389	0.876661	77.0935	578.106	0.868311	97.4474	1021.6	0.821582	113.056	643.764	0.865295	100.363	760.132	0.722595	104.933	571.702	0.904299	54.1868	577.558	0.91185	58.3786	582.69	0.64007	119.094	354.838	0.685314	125.987	429.422	0.601458	171.957	497.858	0.758943	138.178	631.021
Baz1a	0.926309	21.71	273.051	0.900049	44.3538	450.022	0.958444	30.321	732.892	0.983041	8.74195	340.02	0.926485	29.1705	584.656	0.883736	118.838	706.542	0.927916	62.8091	664.072	0.913745	64.5191	712.363	0.974505	12.7968	272.548	0.896064	54.1868	748.934	0.939197	50.0388	716.971	0.833739	38.9235	178.737	0.898472	25.9173	202.428	0.936594	27.5981	187.158	0.957647	18.3422	290.78
Baz1b	0.912847	19.7364	370.234	0.918759	33.5651	668.136	0.983377	12.1284	1223.73	0.983041	8.74195	184.57	0.863006	62.5082	545.197	0.944795	35.6515	520.328	0.923989	40.8259	263.788	0.959433	21.5064	400.234	0.925083	23.0342	351.531	0.951994	19.9636	571.087	0.975713	16.6796	606.449	0.871169	24.9808	215.138	0.90648	25.9173	343.506	0.858425	38.2127	226.575	0.89655	37.9072	296.93
Baz2a	0.83041	53.2882	330.291	0.882438	44.3538	489.767	0.958444	30.321	699.166	1	0	0	0.922905	33.3377	336.665	0.916552	57.0424	459.933	0.93983	39.2557	241.972	0.929727	46.5971	566.057	0.891	38.3903	493.959	0.844505	68.4465	567.512	0.92962	41.699	509.733	0.772681	56.352	150.973	0.797712	61.9135	310.115	0.810715	89.1631	311.158	0.890781	47.6897	324.565
Baz2b	0.886701	25.6573	148.019	0.886951	44.3538	525.072	0.966755	24.2568	388.823	0.983041	8.74195	286.205	0.910006	43.7557	650.097	0.881972	85.5635	790.324	0.928694	51.8175	546.243	0.93402	43.0127	520.31	0.896001	30.7122	375.938	0.89438	51.3348	352.005	0.950146	30.5793	721.982	0.7913	54.6092	163.638	0.838353	53.2744	281.783	0.840288	53.0733	263.389	0.924695	39.13	638.178
Bbc3	0.965139	7.89454	142.081	0.922285	32.3663	583.677	0.975066	18.1926	298.923	0.983041	8.74195	1097.69	0.970002	14.5852	415.715	0.988959	7.13029	1293.02	0.986247	6.28091	321.164	0.985407	7.16878	723.65	0.92217	20.4748	367.787	0.972568	11.4077	868.968	0.994857	2.77993	272.851	0.935078	13.3618	202.116	0.9749	5.7594	175.408	0.975137	8.49172	640.643	0.981099	6.11407	858.581
Bbip1	0.657414	148.023	553.246	0.671257	249.34	871.162	0.831671	175.862	1453.98	0.966081	17.4839	1178.3	0.736391	156.271	737.078	0.837279	123.592	836.566	0.825278	135.04	900.746	0.875936	91.9994	750.505	0.593972	209.867	674.201	0.829673	85.5581	606.109	0.884746	83.398	935.275	0.548204	182.418	402.173	0.650784	185.021	598.196	0.631525	133.745	594.356	0.754744	149.183	546.975
Bbs2	0.965139	7.89454	419.835	0.978669	7.19251	527.028	1	0	0	1	0	0	0.978996	8.33443	533.954	1	0	0	0.97937	9.42137	436.831	0.97811	10.7532	382.155	0.980543	5.1187	86.1309	1	0	0	0.963996	19.4595	822.403	0.927457	11.619	189.79	0.952449	13.6786	342.976	0.941436	19.1064	385.926	0.965979	11.0053	655.208
Bbs4	0.991285	1.97364	940.734	0.975113	8.39126	278.117	0.991689	6.06421	1149.43	0.983041	8.74195	311.526	0.989498	4.16721	475.026	0.992639	4.75353	723.006	0.975931	10.9916	127.522	0.985407	7.16878	880.253	0.961085	10.2374	233.906	0.972568	11.4077	473.482	0.994857	2.77993	445.434	0.979279	4.06664	111.508	0.968625	7.19925	169.912	0.957367	12.7376	458.146	0.977319	7.33688	166.686
Bbs5	0.956424	9.86818	137.223	0.989334	3.59626	142.878	0.977113	24.2568	1292.92	0.983041	8.74195	1773.05	0.968494	12.5016	355.658	0.978975	16.6374	1118.41	0.983764	9.42137	553.496	0.990271	4.77919	537.708	0.951357	12.7968	309.236	0.986284	5.70387	553.294	0.98457	8.3398	201.637	0.944137	10.4571	169.381	0.971762	6.47932	296.775	0.963885	8.49172	342.473	0.975732	7.33688	466.115
Bbx	0.828669	51.3145	315.643	0.791453	121.074	657.521	0.880266	103.092	991.967	0.859895	104.903	610.685	0.708223	208.361	816.29	0.735846	244.807	904.423	0.772845	204.13	722.895	0.837641	136.207	703.079	0.761387	115.171	614.375	0.828795	99.8178	547.706	0.805019	166.796	989.705	0.720364	79.009	227.745	0.753948	95.75	382.675	0.812413	93.4089	346.942	0.890978	57.4722	467.869
BC003331	0.850634	41.4464	473.036	0.92399	28.77	406.664	0.975066	18.1926	990.577	0.932162	34.9678	479.071	0.887734	50.0066	591.322	0.89396	80.81	664.701	0.92143	43.9664	834.94	0.929923	40.6231	671.905	0.844341	40.9496	380.399	0.910847	37.0752	397.226	0.876557	66.7184	743.338	0.785315	45.314	192.674	0.775535	71.2726	334.314	0.837577	63.6879	334.221	0.857205	58.6951	521.848
BC003965	0.889444	27.6309	270.181	0.906253	34.7638	409.563	0.975066	18.1926	1097.64	0.949122	26.2258	287.704	0.930807	35.4213	417.618	0.955836	28.5212	920.346	0.930828	37.6855	495.165	0.952144	25.0907	449.907	0.944422	17.9155	360.965	0.981115	11.4077	765.184	0.957509	33.3592	411.741	0.850234	31.9522	252.508	0.837728	48.9549	367.313	0.838396	50.9503	338.317	0.906115	37.9072	452.526
BC004004	0.867914	37.4991	269.13	0.876745	43.1551	418.167	0.93351	48.5137	437.43	0.966081	17.4839	418.363	0.930807	35.4213	559.758	0.905518	64.1726	660.527	0.865256	92.6435	766.138	0.920868	46.5971	764.074	0.891	38.3903	218.231	0.94719	25.6674	258.93	0.893813	75.0582	828.891	0.628929	113.285	308.834	0.727711	104.389	474.818	0.759366	101.901	379.747	0.849891	68.4776	405.508
BC005537	0.678441	134.207	353.912	0.694309	218.173	719.598	0.886273	90.9631	916.976	0.949122	26.2258	897.744	0.735435	233.364	634.98	0.760018	280.458	875.988	0.84019	175.866	746.229	0.858208	136.207	572.446	0.799484	112.611	459.64	0.715554	185.376	615.175	0.849218	119.537	747.652	0.68754	104.571	212.097	0.726737	108.709	314.358	0.723492	108.269	350.132	0.880382	53.8038	585.674
BC005561	0.816003	49.3409	310.077	0.811331	86.3101	581.716	0.941821	42.4495	1094.41	0.925331	69.9356	890.694	0.815246	102.097	572.678	0.828953	166.374	707.257	0.874722	86.3626	799.383	0.855008	121.869	914.813	0.881411	40.9496	434.391	0.830036	102.67	888.353	0.855867	122.317	1012.83	0.733112	80.7518	237.641	0.727124	109.429	448.586	0.745385	112.515	322.169	0.850576	69.7004	427.671
BC005624	0.915524	21.71	145.472	0.878892	45.5526	629.267	0.966755	24.2568	1025.39	1	0	0	0.867892	70.8426	439.629	0.921315	57.0424	587.433	0.942557	36.1153	417.278	0.911805	52.5711	856.307	0.919629	30.7122	301.526	0.945137	22.8155	409.897	0.939886	36.1391	827.571	0.738618	63.3234	257.585	0.822399	56.1541	271.183	0.820531	55.1962	359.142	0.841749	69.7004	451.581
BC016579	1	0	0	0.99289	2.3975	1235.91	1	0	0	0.983041	8.74195	654.879	0.994749	2.08361	1269.04	0.992639	4.75353	433.599	1	0	0	0.923036	51.3763	745.214	0.854666	51.187	523.611	0.897131	42.779	583.266	0.877362	80.618	1063.49	0.888787	24.3998	256.478	0.933761	17.9981	393.576	0.945827	14.8605	222.048	0.982151	7.33688	127.956
BC017643	0.947708	11.8418	707.627	0.958448	15.5838	225.632	0.991689	6.06421	439.754	0.983041	8.74195	663.57	0.957992	16.6689	189.975	0.916552	57.0424	703.064	0.972493	12.5618	555.86	0.958653	20.3116	277.878	0.951357	12.7968	199.182	0.940361	28.5194	331.199	0.934754	38.9191	311.899	0.939402	13.3618	162.459	0.953936	11.5188	399.667	0.945827	14.8605	336.541	0.967127	12.2281	353.771
BC021891	0.982569	3.94727	93.3097	0.963664	16.7825	767.875	0.983377	12.1284	205.216	1	0	0	0.947489	20.8361	407.732	0.966877	21.3909	706.898	0.976943	12.5618	272.812	0.975678	11.948	204.268	0.97321	10.2374	162.079	0.993142	2.85194	174.917	0.994857	2.77993	171.321	0.970983	4.64759	97.5448	0.985969	2.8797	119.432	0.950888	10.6147	77.6738	0.989591	4.89126	229.886
BC022687	0.932887	17.7627	602.08	0.951352	17.9813	375.966	0.975066	18.1926	973.229	1	0	0	0.980389	10.418	1140.69	0.985279	9.50706	939.417	0.986247	6.28091	762.941	0.982975	8.36358	301.26	0.970814	7.67805	486.508	0.967617	17.1116	777.561	0.98457	8.3398	929.976	0.960101	6.39043	108.811	0.957068	10.7989	326.436	0.963885	8.49172	252.376	0.970891	11.0053	639.472
BC023829	0.973854	5.92091	763.795	0.975113	8.39126	224.822	1	0	0	1	0	0	0.984247	6.25082	173.607	1	0	0	0.986247	6.28091	384.022	0.995136	2.38959	1441.18	1	0	0	0.972568	11.4077	296.266	0.994857	2.77993	280.034	0.979279	4.06664	114.127	0.976761	5.03947	111.144	0.990971	2.12293	70.8767	0.99244	2.44563	134.182
BC024978	0.973854	5.92091	105.709	0.985779	4.79501	215.73	1	0	0	1	0	0	0.991337	10.418	1651.16	0.988959	7.13029	1105.29	0.994174	6.28091	143.149	0.981271	10.7532	705.506	0.970814	7.67805	110.368	0.993142	2.85194	2421.31	0.98457	8.3398	859.64	0.960101	6.39043	316.576	0.982076	5.03947	178.115	0.981942	4.24586	315.577	0.99622	1.22281	149.165
BC026585	0.958847	11.8418	163.109	0.953782	15.5838	592.064	0.991689	6.06421	478.469	1	0	0	0.989498	4.16721	102.112	0.981598	11.8838	925.16	0.986247	6.28091	1144.51	0.978849	11.948	580.666	0.951357	12.7968	213.675	0.986284	5.70387	545.726	0.98457	8.3398	370.071	0.940526	11.038	290.007	0.923531	19.438	194.036	0.942035	12.7376	280.92	0.945543	22.0106	436.62
BC027231	0.965139	7.89454	255.21	0.985779	4.79501	656.675	0.983377	12.1284	306.833	1	0	0	0.978996	8.33443	234.107	0.966877	21.3909	609.25	0.993123	3.14046	78.5209	0.981271	10.7532	894.517	0.970814	7.67805	222.122	0.993142	2.85194	220.848	0.98457	8.3398	198.797	0.967356	5.22854	272.856	0.98745	2.8797	339.411	0.990971	2.12293	70.8767	0.99244	2.44563	1224.24
BC029214	0.710442	92.7609	372.001	0.778761	128.266	489.288	0.916887	60.6421	1067.76	0.966081	17.4839	291.013	0.835811	93.7623	574.194	0.923198	61.7959	749.404	0.867444	87.9328	793.858	0.905151	57.3503	635.847	0.816981	79.3399	323.657	0.938783	42.779	419.041	0.929182	55.5986	1115.48	0.497777	217.275	416.1	0.67109	137.506	398.499	0.710197	140.113	576.979	0.811401	114.944	524.41
BC030336	0.965139	7.89454	77.5149	0.983212	7.19251	121.09	1	0	0	1	0	0	0.984247	6.25082	130.882	0.992639	4.75353	314.362	0.972493	12.5618	537.026	0.980543	9.55838	188.962	0.990271	2.55935	83.3333	0.993142	2.85194	550.055	0.989713	5.55986	193.533	0.923423	14.5237	235.016	0.943114	15.8383	222.786	0.92777	16.9834	132.725	0.977319	7.33688	332.941
BC031181	0.729864	128.286	379.599	0.804146	113.881	774.103	0.773872	254.697	1112.81	0.626386	279.742	666.073	0.775511	135.434	698.37	0.7025	278.081	946.503	0.751167	189.998	1109.14	0.834762	145.765	991.243	0.714896	156.12	526.675	0.759863	162.56	547.291	0.794269	169.576	842.793	0.478368	292.798	478.775	0.513902	305.968	629.396	0.598121	242.014	524.525	0.652033	273.91	716.432
BC037034	0.921562	17.7627	300.886	0.917868	32.3663	362.329	0.905039	84.8989	1082.26	1	0	0	0.910006	43.7557	525.985	1	0	0	0.989685	4.71069	638.827	0.995136	2.38959	697.644	0.990271	2.55935	117.841	0.993142	2.85194	199.243	0.994857	2.77993	130.976	0.965938	5.22854	188.692	0.952937	10.7989	522.42	0.983881	6.36879	323.178	0.977319	7.33688	156.125
BC048679	0.978279	13.8155	296.224	0.993976	4.79501	2739.16	1	0	0	0.511371	1792.1	2731.24	0.36625	5536.14	6241.99	0.625527	1540.14	3559.39	0.570351	2626.99	4558.18	0.976287	38.2335	3792.46	0.990271	2.55935	376.506	0.986284	5.70387	950.36	1	0	0	1	0	0	1	0	0	1	0	0	1	0	0
Bcam	1	0	0	0.930109	31.1675	584.318	1	0	0	1	0	0	0.976881	16.6689	694.896	0.961599	30.8979	595.512	0.981063	12.5618	648.405	0.990271	4.77919	1070	0.990271	2.55935	125.913	0.993142	2.85194	1464.13	0.989713	5.55986	1014.7	0.970983	4.64759	105.149	0.978037	5.03947	199.619	0.954856	10.6147	108.149	0.984879	4.89126	211.097
Bcap29	0.973854	5.92091	246.828	0.962905	15.5838	383.868	0.958444	30.321	1072.53	0.983041	8.74195	1131.22	0.952741	18.7525	413.059	0.937434	40.405	726.911	0.971595	18.8427	751.507	0.978849	11.948	1387.53	0.941628	15.3561	105.107	0.96571	14.2597	421.108	0.953709	25.0194	781.389	0.918834	14.5237	141.29	0.916318	20.8778	184.945	0.954856	10.6147	141.135	0.95681	17.1194	345.02
Bcap31	0.821853	55.2618	264.632	0.838577	75.5214	494.425	0.810078	169.798	875.991	0.776525	148.613	754.107	0.859147	66.6754	673.867	0.783324	173.504	960.264	0.837133	102.065	699.559	0.886297	62.1295	673.083	0.741406	84.4586	352.634	0.738508	148.301	561.958	0.719854	197.375	886.403	0.632342	112.704	294.644	0.572801	196.539	646.384	0.60899	167.712	470.644	0.642895	207.878	622.773
Bcar1	0.94347	17.7627	261.078	0.907247	35.9626	448.165	0.991689	6.06421	599.52	0.985631	17.4839	374.392	0.960778	20.8361	322.944	0.939654	45.1585	574.312	0.980357	10.9916	418.516	0.969797	17.922	760.787	0.905702	28.1529	356.611	0.931421	28.5194	466.526	0.989713	5.55986	874.549	0.949384	11.038	222.706	0.953936	11.5188	266.444	0.950888	10.6147	370.4	0.98866	3.66844	86.8015
Bcar3	0.982569	3.94727	201.923	0.982224	5.99376	262.903	1	0	0	1	0	0	0.994749	2.08361	318.573	0.988959	7.13029	910.747	0.986247	6.28091	715.386	0.993302	4.77919	295.141	0.961085	10.2374	394.4	0.979426	8.55581	536.432	0.989713	5.55986	119.335	0.909449	20.3332	183.945	0.952937	10.7989	234.342	0.927802	14.8605	182.933	0.959591	14.6738	427.667
Bcas2	0.82236	45.3936	331.758	0.810611	85.1114	795.004	0.966755	24.2568	1709.03	0.983041	8.74195	580.046	0.854698	60.4246	793.479	0.935989	47.5353	980.769	0.887103	67.5198	596.844	0.907441	50.1815	706.25	0.856541	53.7464	409.877	0.958852	17.1116	489.339	0.927992	38.9191	663.471	0.731469	68.5519	243.44	0.741595	83.5113	393.473	0.765746	80.6714	443.173	0.853605	75.8145	391.431
Bcas3	0.919478	25.6573	201.775	0.888714	46.7513	435.618	0.983377	12.1284	1636.44	0.983041	8.74195	1890.36	0.947278	31.2541	466.829	0.988959	7.13029	954.844	0.993123	3.14046	176.896	0.975678	11.948	776.819	0.990271	2.55935	92.1489	0.986284	5.70387	233.028	0.990817	8.3398	1283.11	0.881654	25.5617	296.104	0.86494	34.5564	247.575	0.918741	19.1064	316.295	0.936075	26.9019	333.346
Bcat1	1	0	0	1	0	0	1	0	0	1	0	0	0.968494	12.5016	232.879	0.992639	4.75353	237.843	0.975931	10.9916	567.874	0.982975	8.36358	239.516	0.970814	7.67805	406.516	0.979426	8.55581	197.006	0.989713	5.55986	1124.65	0.8991	19.1713	158.537	0.92259	18.718	151.49	0.942035	12.7376	234.006	0.965979	11.0053	433.603
Bcat2	0.965139	7.89454	605.568	0.936006	21.5775	495.705	0.991689	6.06421	825.764	1	0	0	0.957992	16.6689	361.188	0.985279	9.50706	549.578	0.982808	7.85114	265.918	0.970814	14.3376	523.16	0.951357	12.7968	426.88	0.96571	14.2597	722.273	0.994857	2.77993	399.042	0.921383	13.3618	207.255	0.92259	18.718	232.921	0.936799	16.9834	142.643	0.96336	13.451	265.321
Bccip	0.891771	29.6045	300.668	0.886951	44.3538	606.095	0.950132	36.3852	665.896	0.915203	43.7097	640.665	0.873464	58.341	459.473	0.967994	23.7676	1083.94	0.892373	61.2389	625.765	0.933498	41.8179	678.565	0.939811	28.1529	267.682	0.945137	22.8155	701.897	0.933135	36.1391	591.14	0.696811	70.8757	277.591	0.786631	66.953	347.442	0.829467	53.0733	579.319	0.854915	70.9232	419.457
Bcdin3d	0.94347	17.7627	273.5	0.985779	4.79501	128.236	1	0	0	0.983041	8.74195	654.879	0.978996	8.33443	167.737	0.985279	9.50706	410.026	0.97937	9.42137	703.099	0.990271	4.77919	763.781	1	0	0	0.986284	5.70387	533.581	0.994857	2.77993	341.18	0.963728	5.80948	124.169	0.96646	8.6391	554.117	0.968061	6.36879	173.591	0.99622	1.22281	68.362
Bche	0.956424	9.86818	600.5	0.947803	19.18	284.061	0.966755	24.2568	1065.91	0.966081	17.4839	657.153	0.984247	6.25082	219.17	0.970557	19.0141	732.272	0.993123	3.14046	338.153	0.985407	7.16878	725.487	1	0	0	0.924563	31.3713	315.072	0.989713	5.55986	187.14	0.934711	10.4571	88.6152	0.94934	14.3985	282.468	0.950888	10.6147	95.8093	0.977319	7.33688	213.663
Bckdha	0.883112	31.5782	494.388	0.838354	68.3289	451.087	0.950132	36.3852	1120.68	0.932162	34.9678	506.024	0.933389	29.1705	392.25	0.923908	52.2888	919.303	0.93766	34.545	930.029	0.9317	38.2335	565.868	0.93476	20.4748	168.714	0.945137	22.8155	498.994	0.953709	25.0194	1097.7	0.831443	30.7903	214.629	0.868971	33.8365	419.285	0.867441	38.2127	464.481	0.839355	67.2548	454.761
Bckdhb	0.946081	21.71	225.948	0.938165	23.975	598.857	1	0	0	0.983041	8.74195	663.57	0.978996	8.33443	186.996	0.99632	2.37676	1628.66	0.986247	6.28091	681.174	0.982975	8.36358	776.683	0.980543	5.1187	318.368	1	0	0	0.974283	13.8997	739.688	0.918834	15.1047	169.761	0.946662	12.2387	210.093	0.930473	23.3522	146.307	0.916837	28.1247	569.159
Bckdk	0.912847	19.7364	217.959	0.894515	37.1613	505.328	0.941821	42.4495	1415.96	1	0	0	0.938629	27.0869	430.516	0.948475	33.2747	1115.37	0.929917	36.1153	329.126	0.921121	53.7659	511.621	0.879187	38.3903	308.863	0.910847	37.0752	344.084	0.91302	61.1585	737.865	0.774431	53.4473	224.202	0.845217	48.9549	358.558	0.813601	59.4421	419.048	0.880382	52.581	292.317
Bcl10	0.938993	13.8155	268.291	0.903705	37.1613	580.113	0.966755	24.2568	940.966	0.983041	8.74195	389.712	0.870443	54.1738	539.128	0.922713	49.9121	783.408	0.891196	67.5198	703.012	0.955903	26.2855	669.376	0.92217	20.4748	336.184	0.96571	14.2597	975.172	0.955271	27.7993	903.184	0.781831	49.3806	204.047	0.824611	51.1147	283.911	0.842	57.3191	213.741	0.891086	41.5757	414.906
Bcl2	0.965139	7.89454	227.002	0.945245	21.5775	560.81	0.991689	6.06421	1739.13	1	0	0	0.990625	6.25082	211.513	0.992639	4.75353	1420.84	0.97937	9.42137	244.891	0.990917	5.97399	222.153	1	0	0	1	0	0	1	0	0	0.992746	1.1619	776.84	0.996862	0.719925	114.613	0.990971	2.12293	502.008	0.99622	1.22281	1092.9
Bcl2a1a	0.806275	96.7082	387.837	0.928074	44.3538	547.488	0.991689	6.06421	476.417	1	0	0	0.989498	4.16721	902.683	1	0	0	1	0	0	1	0	0	1	0	0	1	0	0	1	0	0	0.996927	1.1619	678.887	1	0	0	0.990971	2.12293	99.1572	1	0	0
Bcl2l1	0.973854	5.92091	158.048	0.950227	16.7825	200.102	0.991689	6.06421	906.618	0.949122	26.2258	825.26	0.963243	14.5852	375.336	0.981598	11.8838	971.655	0.969723	25.1237	598.031	0.961085	19.1168	862.182	0.944422	17.9155	450.613	0.942013	31.3713	384.49	0.974283	13.8997	1074.98	0.862982	27.8855	157.12	0.934112	15.8383	183.67	0.882626	27.5981	288.787	0.938019	23.2335	562.205
Bcl2l11	0.936491	21.71	166.154	0.956663	19.18	418.092	0.975066	18.1926	462.19	1	0	0	0.901945	52.0902	471.822	0.955836	28.5212	425.577	0.923989	40.8259	537.071	0.957004	22.7012	758.998	0.954062	15.3561	114.932	0.951994	19.9636	423.056	0.974283	13.8997	774.959	0.917951	17.4285	130.308	0.950803	12.2387	442.136	0.950888	10.6147	92.8502	0.968256	9.78251	353.576
Bcl2l12	0.991285	1.97364	210.748	0.97694	10.7888	445.18	1	0	0	0.983041	8.74195	187.196	1	0	0	1	0	0	0.97937	9.42137	371.409	0.987839	5.97399	1222.35	0.990271	2.55935	79.3462	0.986284	5.70387	231.008	0.989713	5.55986	1677.36	0.940526	11.038	162.956	0.9498	11.5188	284.098	0.972914	6.36879	84.7686	0.958418	13.451	292.995
Bcl2l13	0.973854	5.92091	153.34	0.950227	16.7825	378.559	1	0	0	1	0	0	0.968494	12.5016	346.765	0.988959	7.13029	387.671	0.97937	9.42137	204.686	0.97811	10.7532	412.051	0.970814	7.67805	579.559	0.972568	11.4077	800.052	0.969139	16.6796	1049.15	0.952205	9.87612	128.376	0.959212	9.35902	279.873	0.975137	8.49172	134.551	0.969759	9.78251	162.086
Bcl2l14	1	0	0	0.996445	1.19875	219.877	1	0	0	1	0	0	0.994749	2.08361	215.239	0.988959	7.13029	1348.37	0.996562	1.57023	169.176	0.985407	7.16878	1049.54	0.91774	28.1529	213.542	0.993142	2.85194	280.034	0.963996	19.4595	1004.05	0.816145	50.5425	259.608	0.829714	56.8741	271.397	0.863566	55.1962	291.343	0.840984	69.7004	489.849
Bcl2l15	0.574568	783.534	1141.35	0.707366	599.376	1142.81	0.936625	109.156	2147.3	0.949122	26.2258	637.432	0.698729	260.451	807.001	0.974238	16.6374	1213.81	0.921327	109.916	899.489	0.881693	149.35	1157.77	0.725126	307.122	995.993	0.946085	42.779	457.322	0.901812	105.637	833.129	0.834233	48.7997	323.255	0.861203	45.3553	458.925	0.894477	29.721	289.292	0.943298	18.3422	367.393
Bcl2l2	0.950212	13.8155	117.8	0.963664	16.7825	263.214	1	0	0	0.983041	8.74195	423.549	0.963243	14.5852	431.027	0.988959	7.13029	414.842	0.965616	15.7023	250.824	0.969147	16.7272	303.449	0.951357	12.7968	219.762	0.972568	11.4077	476.613	0.989713	5.55986	985.029	0.859393	29.0474	144.056	0.923531	19.438	172.227	0.921483	21.2293	181.53	0.95681	17.1194	221.866
Bcl3	1	0	0	0.996445	1.19875	2364.07	1	0	0	0.966081	17.4839	408.048	0.960778	20.8361	618.53	0.992639	4.75353	1140.1	0.986247	6.28091	514.872	0.971574	15.5324	635.416	0.903811	40.9496	364.782	0.951994	19.9636	890.077	0.971673	22.2395	883.844	0.910774	18.0094	316.817	0.931417	19.438	445.812	0.975137	8.49172	244.025	0.971765	12.2281	135.9
Bcl7a	0.947708	11.8418	293.406	0.947803	19.18	241.441	1	0	0	1	0	0	0.978996	8.33443	510.158	0.977918	14.2606	751.159	0.97937	9.42137	543.435	0.988515	7.16878	344.129	0.951357	12.7968	203.533	0.986284	5.70387	429.573	0.989713	5.55986	315.455	0.923423	14.5237	176.122	0.92259	19.438	399.878	0.921483	23.3522	223.869	0.964301	14.6738	413.577
Bcl7b	0.845931	37.4991	174.804	0.926602	32.3663	442.271	0.960755	36.3852	416.56	0.966081	17.4839	1080.03	0.945211	27.0869	303.135	0.981598	11.8838	1182.57	0.930828	37.6855	738.424	0.963517	17.922	449.748	0.961085	10.2374	322.008	0.993142	2.85194	323.311	0.974283	13.8997	963.81	0.845295	34.8569	234.847	0.925725	17.9981	352.293	0.831369	42.4586	362.877	0.967127	12.2281	536.388
Bcl7c	0.898141	25.6573	296.664	0.877716	56.3413	346.044	0.991689	6.06421	289.101	0.983041	8.74195	345.662	0.941167	31.2541	552.17	0.941114	38.0282	878.238	0.922953	47.1069	460.18	0.948652	29.8699	543.112	0.879187	38.3903	387.871	0.951994	19.9636	532.132	0.939886	36.1391	405.18	0.726855	67.971	234.492	0.806979	59.7538	361.035	0.743896	70.0567	380.198	0.860298	64.8091	449.711
Bcl9	0.991285	1.97364	212.947	0.975113	8.39126	303.845	0.975066	18.1926	680.355	0.949122	26.2258	625.832	0.994749	2.08361	283.126	1	0	0	1	0	0	0.985407	7.16878	394.839	0.980543	5.1187	83.6193	0.979426	8.55581	425.709	0.979426	11.1197	610.507	0.978237	3.48569	92.028	0.984312	3.59962	140.553	0.963885	8.49172	214.481	0.973539	9.78251	128.308
Bcl9l	0.967451	9.86818	578.057	0.928476	28.77	622.292	0.966755	24.2568	490.678	0.966081	17.4839	381.785	0.899579	47.923	456.033	0.94229	40.405	659.334	0.960715	21.9832	289.582	0.957004	22.7012	535.749	0.941628	15.3561	370.579	0.901203	48.4829	411.958	0.969139	16.6796	433.733	0.938338	10.4571	109.069	0.929791	18.718	177.268	0.972914	6.36879	908.194	0.977319	7.33688	375.819
Bclaf1	0.718765	104.603	396.73	0.704554	157.036	571.858	0.891954	78.8347	789.153	0.966081	17.4839	1143.99	0.752581	168.772	738.955	0.790173	211.532	801.522	0.821528	135.04	780.672	0.830603	130.233	730.211	0.764808	84.4586	365.362	0.832808	91.262	711.464	0.861503	102.857	633.013	0.659585	122.58	235.855	0.632326	160.543	378.223	0.707559	157.097	493.139	0.81069	127.173	562.846
Bcor	0.973854	5.92091	414.387	0.982224	5.99376	302.588	1	0	0	1	0	0	0.989498	4.16721	1558.92	1	0	0	1	0	0	0.98369	9.55838	676.168	0.970814	7.67805	109.75	0.972568	11.4077	559.854	0.979426	11.1197	462.066	0.963728	5.80948	221.395	0.977137	7.91917	193.511	0.945827	12.7376	310.911	0.99244	2.44563	87.0835
Bcr	0.915524	21.71	249.375	0.939878	26.3725	440.431	0.93792	60.6421	719.114	1	0	0	0.945211	27.0869	739.673	0.977918	14.2606	594.459	0.983764	9.42137	399.17	0.964291	19.1168	560.723	0.970814	7.67805	106.821	0.958852	17.1116	464.256	0.953709	25.0194	782.149	0.895493	19.7522	207.118	0.913036	28.0771	375.354	0.912486	23.3522	288.016	0.968772	14.6738	134.983
Bcs1l	0.947708	11.8418	351.376	0.972623	10.7888	963.892	0.975066	18.1926	580.226	1	0	0	0.949103	22.9197	489.811	0.988959	7.13029	722.85	0.980357	10.9916	327.754	0.985407	7.16878	799.232	0.961085	10.2374	136.25	0.96571	14.2597	501.254	0.994857	2.77993	269.76	0.964843	6.39043	145.292	0.952937	10.7989	240.289	0.936799	16.9834	114.996	0.965979	11.0053	417.173
Bdh1	0.991285	1.97364	82.2707	0.978669	7.19251	527.532	1	0	0	1	0	0	0.978996	8.33443	198.311	0.99632	2.37676	237.023	0.993123	3.14046	85.3099	0.987839	5.97399	857.621	0.990271	2.55935	799.361	1	0	0	0.989713	5.55986	1434.95	0.944137	10.4571	375.826	0.957068	10.7989	172.687	0.957367	12.7376	414.332	0.979438	6.11407	830.771
Bdp1	0.906834	23.6836	313.159	0.92399	28.77	502.826	0.960755	36.3852	445.816	0.966081	17.4839	208.779	0.869582	62.5082	499.703	0.887124	76.0565	583.238	0.916423	61.2389	721.406	0.915338	53.7659	691.777	0.900569	35.8309	485.898	0.878688	68.4465	717.341	0.922848	41.699	605.463	0.814381	44.1521	145.79	0.846051	53.9944	306.231	0.900548	36.0898	223.833	0.928178	24.4563	276.847
Becn1	0.829948	67.1036	220.429	0.845412	59.9376	499.596	0.975066	18.1926	678.713	0.915203	43.7097	781.378	0.89365	60.4246	557.125	0.857331	116.461	797.465	0.871589	78.5114	457.925	0.921457	47.7919	565.085	0.824884	46.0683	404.14	0.910847	37.0752	509.858	0.933135	36.1391	808.206	0.724998	70.2948	190.153	0.808456	66.953	297.036	0.841957	72.1796	443.354	0.857208	52.581	438.325
Bend5	0.982569	3.94727	110.907	0.968003	10.7888	190.106	1	0	0	0.983041	8.74195	564.016	0.980389	10.418	437.398	0.959516	26.1444	887.887	0.957302	23.5534	483.925	0.952144	25.0907	650.176	0.892984	28.1529	249.289	0.94719	25.6674	318.437	0.950146	30.5793	323.01	0.816751	39.5045	128.587	0.866361	47.515	325.004	0.820135	67.9338	416.544	0.883336	50.1354	575.606
Bend7	0.909065	25.6573	250.353	0.895605	38.3601	453.974	0.966755	24.2568	1483.64	1	0	0	0.968494	12.5016	482.941	0.981598	11.8838	605.715	0.980357	10.9916	1122.13	0.990271	4.77919	571.462	0.961085	10.2374	199.952	0.986284	5.70387	363.781	0.980791	13.8997	524.923	0.868473	25.5617	167.094	0.897111	27.3571	276.886	0.885911	42.4586	424.18	0.933175	24.4563	357.673
Bet1	0.848988	51.3145	194.453	0.859574	55.1426	406.953	0.923211	78.8347	972.836	0.983041	8.74195	369.14	0.885216	56.2574	558.217	0.92023	54.6656	746.414	0.89523	67.5198	730.996	0.922001	43.0127	599.694	0.808577	53.7464	483.496	0.979426	8.55581	234.362	0.938279	33.3592	565.422	0.722173	67.39	331.724	0.82414	58.3139	307.3	0.791419	59.4421	274.381	0.850568	62.3635	462.272
Bet1l	0.721049	108.55	386.501	0.750713	127.068	647.905	0.91944	66.7063	1124.74	0.889996	78.6775	619.181	0.714049	160.438	703.191	0.848611	144.983	1040.31	0.822886	127.189	896.145	0.843581	111.116	826.114	0.699093	120.29	452.061	0.820715	99.8178	746.343	0.824902	119.537	961.495	0.718955	111.542	326.325	0.675614	133.186	460.856	0.637505	167.712	446.536	0.773313	130.841	779.862
Bex1	0.982569	3.94727	644.927	0.975113	8.39126	460.082	0.975066	18.1926	1325.91	1	0	0	0.975205	12.5016	684.122	0.992639	4.75353	977.042	0.970927	17.2725	562.552	0.958906	34.6491	1040.67	0.837734	46.0683	386.452	0.979426	8.55581	845.927	0.979426	11.1197	961.511	0.985491	2.32379	125.586	0.993725	1.43985	1276.64	0.990971	2.12293	405.515	0.99622	1.22281	1154.73
Bex2	0.895439	51.3145	514.478	0.854615	95.9001	880.231	0.931339	72.7705	801.375	0.949122	26.2258	398.128	0.780345	168.772	753.374	0.911671	57.0424	776.462	0.837104	124.048	827.151	0.930649	48.9867	836.815	0.8211	53.7464	367.232	0.979426	8.55581	253.069	0.979426	11.1197	786.973	0.960101	6.39043	248.695	0.96646	8.6391	425.594	0.939454	16.9834	193.698	0.984879	4.89126	418.441
Bex4	0.881857	63.1564	905.995	0.830417	149.844	780.609	0.890221	145.541	1149.66	0.847365	78.6775	816.807	0.730114	187.525	734.546	0.898161	68.9262	970.8	0.783264	158.593	1274.22	0.892649	179.22	887.415	0.764448	266.173	749.841	0.942934	65.5945	942.422	0.91573	94.5177	761.769	0.753985	71.4567	308.448	0.829091	79.9117	364.691	0.869801	53.0733	354.807	0.882144	66.0319	510.367
Bfar	0.874446	33.5518	271.317	0.93711	28.77	439.19	0.991689	6.06421	242.777	0.983041	8.74195	219.443	0.963243	14.5852	880.379	0.955138	38.0282	1093.9	0.951863	21.9832	311.292	0.964962	20.3116	497.672	0.925083	23.0342	314.161	0.945137	22.8155	492.78	0.958852	22.2395	835.863	0.8991	19.1713	110.93	0.908766	24.4774	221.189	0.897243	23.3522	189.737	0.948275	18.3422	331.426
Bglap3	0.741848	272.362	912.842	0.760872	294.893	1672.93	0.902868	187.99	2415.47	0.983041	8.74195	219.443	0.959826	64.5918	1439.69	0.996882	4.75353	2447.98	0.986905	21.9832	651.681	0.96703	38.2335	1470.13	0.884394	66.5431	500.387	0.971221	39.9271	2518.33	0.894188	127.877	1935.34	0.829389	139.428	818.591	0.840886	159.103	986.658	0.856887	118.884	493.859	0.943506	94.1567	834.127
Bgn	0.991285	1.97364	207.857	0.99289	2.3975	178.29	1	0	0	0.983041	8.74195	1097.69	0.994749	2.08361	2493.77	0.988959	7.13029	1744.3	0.981032	17.2725	986.528	0.985407	7.16878	387.715	0.990271	2.55935	87.0928	1	0	0	0.98457	8.3398	1342.22	0.979901	11.038	917.757	0.935786	25.1974	1317.98	0.921483	21.2293	871.257	0.989591	4.89126	425.388
Bhlhb9	0.947708	11.8418	151.522	0.952318	19.18	665.052	0.958444	30.321	843.989	0.949122	26.2258	329.733	0.954335	20.8361	470.745	0.936925	49.9121	684.468	0.91814	54.958	679.224	0.978849	11.948	1077.07	0.990271	2.55935	679.81	1	0	0	0.974283	13.8997	686.844	0.871169	24.3998	166.562	0.915287	20.1579	249.447	0.923658	23.3522	171.888	0.941782	22.0106	288.678
Bhlhe40	0.618193	392.754	941.106	0.594868	509.47	1035.6	0.771131	242.568	1239.21	0.932162	34.9678	933.006	0.752935	245.866	774.869	0.912247	68.9262	1069.35	0.859873	109.916	762.466	0.873794	86.0254	758.537	0.799614	87.0179	603.901	0.878688	68.4465	405.785	0.884904	69.4983	930.311	0.764344	64.4853	324.989	0.800198	97.1898	510.723	0.764261	142.236	433.615	0.847393	80.7057	615.698
Bhlhe41	0.72026	126.313	498.067	0.650808	279.309	675.817	0.794322	266.825	1163.18	1	0	0	0.915719	58.341	601.565	0.992639	4.75353	242.328	0.993123	3.14046	428.015	0.969797	17.922	479.265	0.941628	15.3561	380.208	0.926689	34.2232	866.69	0.948566	27.7993	668.15	0.918722	17.4285	281.922	0.940976	23.0376	462.718	0.950888	10.6147	414.677	0.96336	13.451	491.361
Bicd1	0.984441	5.92091	156.016	0.928895	23.975	560.8	1	0	0	0.966081	17.4839	304.06	0.98554	8.33443	222.565	0.985279	9.50706	227.114	0.975931	10.9916	316.965	0.997568	1.1948	858.369	1	0	0	0.993142	2.85194	153.752	0.994857	2.77993	339.674	0.996373	0.580948	85.9328	0.990587	2.15977	105.425	1	0	0	0.98866	3.66844	943.101
Bicd2	0.991285	1.97364	309.119	0.99289	2.3975	92.4173	1	0	0	1	0	0	0.989498	4.16721	105.457	0.977918	14.2606	586.785	0.972493	12.5618	722.716	0.992703	3.58439	110.061	1	0	0	0.972568	11.4077	683.847	0.98457	8.3398	1017.03	0.951488	7.55233	245.042	0.964152	10.0789	191.148	0.972914	6.36879	153.495	0.969759	9.78251	201.442
Bin1	0.930278	15.7891	171.879	0.940701	21.5775	296.127	0.950132	36.3852	843.871	0.949122	26.2258	696.208	0.968494	12.5016	849.286	0.974238	16.6374	674.37	0.989685	4.71069	570.734	0.948924	25.0907	514.051	0.898491	33.2716	215.468	0.948776	28.5194	358	0.955271	27.7993	648.118	0.900735	17.4285	205.522	0.928861	17.2782	283.182	0.86993	40.3357	278.245	0.921845	28.1247	518.816
Bin3	0.932887	17.7627	309.66	0.971558	9.59001	304.213	0.983377	12.1284	698.979	0.983041	8.74195	219.443	0.942239	22.9197	544.635	0.974238	16.6374	702.662	0.969055	14.1321	751.535	0.982975	8.36358	458.501	0.990271	2.55935	339.443	0.979426	8.55581	635.302	0.989713	5.55986	346.737	0.841286	28.4665	182.223	0.93064	18.718	320.577	0.92777	16.9834	323.183	0.94271	23.2335	377.832
Birc2	0.905419	33.5518	504.584	0.901623	34.7638	692.286	0.958444	30.321	1747.01	0.983041	8.74195	564.016	0.919128	37.5049	678.583	0.928654	52.2888	830.523	0.933345	34.545	542.22	0.948001	28.6751	436.266	0.896001	30.7122	179.712	0.940361	28.5194	582.685	0.974283	13.8997	625.681	0.850453	29.0474	188.94	0.873548	38.8759	334.454	0.873597	31.844	289.823	0.952048	18.3422	325.712
Birc3	0.984441	5.92091	117.383	0.973445	11.9875	207.212	0.991689	6.06421	2242.15	0.983041	8.74195	504.796	0.96594	18.7525	710.403	0.974238	16.6374	833.655	0.93766	34.545	372.847	0.990271	4.77919	797.059	0.93476	20.4748	576.174	0.967617	17.1116	741.135	0.980791	13.8997	768.619	0.880438	32.5331	221.054	0.894542	33.1165	477.028	0.909712	25.4752	339	0.957647	18.3422	208.661
Birc6	0.871484	41.4464	181.642	0.864702	50.3476	461.042	0.925199	54.5779	916.535	0.983041	8.74195	369.14	0.864366	64.5918	710.48	0.775689	190.141	786.3	0.891877	80.0817	454.901	0.898179	68.1035	700.909	0.85299	66.5431	273.706	0.778863	131.189	573.298	0.889808	80.618	658.393	0.760875	65.6472	209.412	0.768152	91.4304	386.716	0.804686	61.565	453.347	0.901924	45.2441	310.327
Bivm	0.967451	9.86818	204.898	0.989334	3.59626	191.354	0.991689	6.06421	485.437	0.949122	26.2258	1308.55	0.989498	4.16721	302.794	1	0	0	0.975931	10.9916	505.638	0.987839	5.97399	387.567	0.961085	10.2374	178.499	0.986284	5.70387	182.039	0.989713	5.55986	312.882	0.919815	15.1047	241.245	0.931996	16.5583	229.14	0.918741	19.1064	395.953	0.970891	11.0053	536.764
Blcap	0.947708	11.8418	427.343	0.982224	5.99376	518.062	0.991689	6.06421	274.801	0.983041	8.74195	340.02	0.968494	12.5016	130.063	0.956986	30.8979	631.076	0.962178	17.2725	474.159	0.975678	11.948	688.479	0.961085	10.2374	148.664	0.967617	17.1116	538.086	0.98457	8.3398	992.61	0.813176	39.5045	211.372	0.914213	25.1974	227.315	0.92777	21.2293	228.828	0.924398	25.6791	401.231
Blm	0.991285	1.97364	113.908	0.99289	2.3975	311.632	0.991689	6.06421	2824.86	1	0	0	0.984247	6.25082	1001.48	0.981598	11.8838	902.292	0.986247	6.28091	254.01	0.997568	1.1948	113.482	0.990271	2.55935	125.913	0.96571	14.2597	257.475	1	0	0	0.978237	3.48569	490.075	0.971762	6.47932	351.685	0.981942	4.24586	111.349	0.99244	2.44563	306.316
Blmh	0.982569	3.94727	516.43	0.950227	16.7825	831.151	0.966755	24.2568	773.442	0.953298	34.9678	881.408	0.917425	45.8393	629.634	0.974238	16.6374	1150.12	0.922039	37.6855	675.647	0.958653	20.3116	595.376	0.905702	28.1529	518.356	0.972568	11.4077	683.771	0.943422	30.5793	1070.16	0.803581	39.5045	186.253	0.837917	44.6353	360.277	0.851958	40.3357	386.83	0.886311	41.5757	394.837
Blnk	0.967451	9.86818	302.494	0.914727	40.7576	300.7	0.983377	12.1284	1076.22	1	0	0	0.949103	22.9197	337.818	0.992639	4.75353	603.874	0.960715	21.9832	865.111	0.987839	5.97399	429.733	0.93476	20.4748	221.254	0.972568	11.4077	256.61	0.979426	11.1197	847.731	0.704821	66.8091	221.987	0.84802	43.1955	281.823	0.885467	33.9669	170.3	0.88706	48.9126	347.614
Bloc1s1	0.893764	31.5782	594.107	0.885987	56.3413	408.593	0.96896	30.321	1836.52	0.985631	17.4839	5347.59	0.860523	81.2607	488.575	0.912875	59.4191	1023.07	0.879602	89.503	607.269	0.856228	86.0254	750.034	0.77525	69.1025	628.29	0.931421	28.5194	791.101	0.928225	52.8187	804.929	0.514904	168.475	417.323	0.730757	123.827	537.233	0.785136	95.5319	393.417	0.795446	105.162	630.614
Bloc1s2	0.904132	21.71	189.353	0.903705	37.1613	565.913	0.966755	24.2568	1121.99	0.983041	8.74195	184.57	0.886407	58.341	574.109	0.869877	90.3171	993.259	0.809021	131.899	858.357	0.926821	46.5971	689.949	0.859708	58.8651	467.39	0.96571	14.2597	622.24	0.95651	30.5793	1129.52	0.728026	65.0662	244.953	0.807405	56.8741	379.684	0.800404	57.3191	328.153	0.815984	73.3688	410.502
Bloc1s3	0.973854	5.92091	103.411	0.975113	8.39126	146.427	1	0	0	0.983041	8.74195	2024.29	0.989498	4.16721	731.772	0.988959	7.13029	735.513	0.989685	4.71069	254.101	0.992703	3.58439	709.135	0.980543	5.1187	144.883	1	0	0	0.989713	5.55986	231.025	0.960101	6.39043	148.632	0.978037	5.03947	166.102	0.954856	12.7376	136.21	0.978405	8.5597	413.27
Bloc1s4	0.86334	33.5518	184.821	0.915836	29.9688	573.128	0.958444	30.321	665.429	0.983041	8.74195	252.08	0.935991	33.3377	358.519	0.960657	28.5212	1000.27	0.939216	29.8343	367.999	0.961862	20.3116	671.34	0.927333	25.5935	231.771	0.974388	14.2597	483.101	1	0	0	0.845855	31.3712	220.691	0.904152	26.6372	455.118	0.918117	31.844	199.889	0.936847	29.3475	375.947
Bloc1s5	0.982569	3.94727	106.034	0.986722	5.99376	280.731	1	0	0	1	0	0	1	0	0	1	0	0	0.996562	1.57023	223.564	0.987839	5.97399	465.822	0.990271	2.55935	79.3462	0.993142	2.85194	476.872	0.994857	2.77993	130.976	0.960101	6.39043	106.097	0.97037	8.6391	248.966	0.936798	14.8605	510.468	0.977319	7.33688	299.305
Bloc1s6	0.912847	19.7364	262.71	0.948782	20.3788	431.131	0.991689	6.06421	1406.47	1	0	0	0.954335	20.8361	313.696	0.988959	7.13029	195.01	0.946085	26.6939	676.655	0.969797	17.922	319.821	0.915396	25.5935	190.554	0.972568	11.4077	1022.51	0.970617	19.4595	738.138	0.863779	29.0474	159.698	0.862712	35.2763	278.574	0.864568	36.0898	221.382	0.894845	40.3529	376.941
Blvra	0.982569	3.94727	161	0.971558	9.59001	259.147	0.983377	12.1284	851.007	1	0	0	1	0	0	0.992639	4.75353	360.206	0.97937	9.42137	610.426	0.982975	8.36358	588.818	0.980543	5.1187	81.3398	0.993142	2.85194	269.76	0.979426	11.1197	1041.99	0.967356	5.22854	379.977	0.956075	10.0789	215.128	0.975137	8.49172	102.188	0.954639	14.6738	488.499
Blvrb	0.880745	29.6045	229.227	0.883265	51.5463	464.776	0.991689	6.06421	485.437	0.983041	8.74195	565.611	0.964787	16.6689	288.103	0.971659	21.3909	989.705	0.913496	53.3878	774.555	0.955275	25.0907	630.467	0.873527	33.2716	158.847	0.986284	5.70387	234.501	0.943422	30.5793	732.14	0.75575	68.5519	287.771	0.797076	76.312	287.287	0.726509	97.6548	394.524	0.783724	92.9338	497.488
Blzf1	0.947708	11.8418	373.94	0.931079	26.3725	437.101	0.991689	6.06421	264.831	0.966081	17.4839	285.723	0.899579	47.923	397.637	0.941114	38.0282	861.663	0.936772	32.9748	809.918	0.969797	17.922	744.554	0.931899	17.9155	392.241	0.96571	14.2597	336.593	0.979426	11.1197	342.937	0.871169	24.3998	232.136	0.922242	25.9173	247.232	0.894477	27.5981	257.437	0.950189	20.7878	229.745
Bmi1	0.924209	19.7364	161.545	0.925809	31.1675	376.22	0.975066	18.1926	1348.93	0.983041	8.74195	504.796	0.919128	37.5049	438.853	0.952155	30.8979	533.13	0.941072	32.9748	477.291	0.977031	14.3376	496.941	0.951357	12.7968	228.207	0.972568	11.4077	690.104	0.979426	11.1197	354.564	0.832316	34.8569	202.219	0.895569	29.5169	196.729	0.905794	27.5981	123.358	0.883563	44.0213	475.332
Bmp2k	0.950212	13.8155	731.413	0.959379	16.7825	342.752	0.962312	42.4495	526.948	0.932162	34.9678	353.831	0.943867	25.0033	673.441	0.937434	40.405	757.55	0.960715	21.9832	276.904	0.975678	11.948	464.129	0.970814	7.67805	262.667	0.986284	5.70387	893.658	0.979426	11.1197	362.773	0.922452	13.9428	145.338	0.925725	17.9981	283.064	0.900683	23.3522	451.268	0.969759	9.78251	310.982
Bmp3	1	0	0	1	0	0	1	0	0	1	0	0	1	0	0	1	0	0	0.997087	3.14046	216.076	0.987839	5.97399	1046.39	0.925083	23.0342	181.473	0.926689	34.2232	582.712	0.845075	125.097	1395.51	0.61117	142.913	254.757	0.637126	202.299	546.774	0.630386	199.555	596.686	0.781637	147.96	556.03
Bmp7	1	0	0	0.989334	3.59626	578.865	1	0	0	1	0	0	1	0	0	1	0	0	0.993123	3.14046	541.077	0.982975	8.36358	415.308	0.92217	20.4748	125.138	0.951994	19.9636	678.047	0.976677	19.4595	649.124	0.928695	15.1047	427.574	0.946662	12.2387	290.819	0.972914	6.36879	198.996	0.972001	8.5597	467.765
Bmpr1a	0.938993	13.8155	283.379	0.928895	23.975	652.703	0.966755	24.2568	656.604	0.983041	8.74195	1492.54	0.916382	43.7557	340.41	0.902174	78.4332	655.265	0.933093	42.3962	372.639	0.954574	23.8959	387	0.902713	25.5935	239.581	0.928444	37.0752	606.276	0.947432	38.9191	475.609	0.781831	48.7997	226.454	0.818394	52.5545	283.835	0.882626	29.721	242.524	0.938019	24.4563	201.829
Bmpr1b	0.982569	3.94727	1019.21	0.989334	3.59626	164.693	0.983377	12.1284	843.404	0.932162	34.9678	602.602	0.980389	10.418	316.399	0.905518	64.1726	697.357	0.955301	20.413	264.652	0.968382	15.5324	561.831	0.944422	17.9155	165.796	0.938279	25.6674	292.963	0.963996	19.4595	381.937	0.966488	7.55233	125.517	0.968625	7.19925	155.638	1	0	0	0.984879	4.89126	276.566
Bmpr2	0.780737	67.1036	338.501	0.878892	45.5526	426.241	0.935998	54.5779	966.744	0.969723	26.2258	929.838	0.933389	29.1705	484.893	0.960657	28.5212	577.992	0.970099	15.7023	345.433	0.958317	25.0907	400.626	0.912442	23.0342	226.528	0.877252	65.5945	462.819	0.915665	52.8187	272.996	0.817911	44.1521	133.84	0.820761	50.3947	253.731	0.872101	38.2127	269.986	0.925622	25.6791	315.188
Bms1	0.965139	7.89454	184.016	0.940701	21.5775	615.763	0.991689	6.06421	900.09	1	0	0	0.963243	14.5852	425.085	0.981598	11.8838	305.927	0.969055	14.1321	698.045	0.97811	10.7532	169.335	0.990271	2.55935	70.3779	0.972568	11.4077	203.464	0.994857	2.77993	598.086	0.899632	17.4285	211.096	0.932921	17.2782	294.677	0.954856	10.6147	111.369	0.969759	9.78251	704.667
Bmyc	0.510153	1034.19	1449.07	0.578233	1041.72	1797.58	0.937505	121.284	1267.82	0.936662	43.7097	781.743	0.904653	77.0935	784.585	1	0	0	0.980357	10.9916	878.973	1	0	0	1	0	0	1	0	0	0.98457	8.3398	1110.89	0.829735	32.5331	266.765	0.882169	35.2763	354.999	0.873597	29.721	226.94	0.918227	34.2388	532.201
Bnip1	0.958847	11.8418	194.626	0.936006	21.5775	287.412	0.991689	6.06421	129.199	1	0	0	0.95041	25.0033	307.86	0.985279	9.50706	450.155	0.956383	21.9832	687.052	0.988515	7.16878	241.901	0.931899	17.9155	618.061	0.993142	2.85194	292.312	0.979426	11.1197	1319.87	0.898143	19.1713	176.516	0.944535	13.6786	157.889	0.954856	10.6147	187.866	0.913058	29.3475	497.592
Bnip2	0.973854	5.92091	207.973	0.950227	16.7825	282.529	0.983377	12.1284	508.187	1	0	0	0.957992	16.6689	185.711	0.988959	7.13029	354.08	0.964124	20.413	825.056	0.979435	13.1428	277.133	0.970814	7.67805	341.967	0.972568	11.4077	301.594	0.979426	11.1197	1256.66	0.897114	18.0094	170.964	0.911793	26.6372	448.669	0.86993	36.0898	548.633	0.965075	15.8966	538.566
Bnip3	0.938993	13.8155	267.183	0.892236	45.5526	430.723	0.93351	48.5137	1116.87	0.903114	61.1936	689.599	0.841303	108.348	481.355	0.89762	78.4332	906.138	0.797838	144.461	940.138	0.917149	45.4023	635.085	0.792003	61.4244	490.803	0.979426	8.55581	225.137	0.969139	16.6796	604.219	0.808225	42.9902	236.558	0.841034	44.6353	248.675	0.822349	48.8274	344.058	0.860985	66.0319	563.834
Bnip3l	0.719451	124.339	381.299	0.7424	154.639	518.014	0.941821	42.4495	830.693	0.898243	52.4517	579.964	0.798786	135.434	602.764	0.898525	80.81	968.338	0.817534	113.056	902.786	0.845596	117.09	899.549	0.648107	166.358	486.601	0.921644	39.9271	338.072	0.874606	88.9578	662.029	0.50728	244.579	422.339	0.617554	188.62	440.154	0.620512	171.957	468.003	0.676652	201.764	692.575
Bod1	0.883112	31.5782	147.962	0.875449	52.7451	492.434	0.985162	18.1926	619.773	1	0	0	0.887734	50.0066	314.349	0.981598	11.8838	654.503	0.934828	47.1069	292.568	0.955275	25.0907	309.437	0.915396	25.5935	182.675	0.958852	17.1116	220.919	0.953709	25.0194	434.448	0.828728	34.8569	169.603	0.89868	29.5169	171.818	0.888245	25.4752	172.168	0.938019	23.2335	487.525
Bod1l	0.796282	51.3145	231.106	0.82426	73.1239	579.707	0.935998	54.5779	876.742	0.898243	52.4517	709.675	0.863761	75.0098	412.451	0.884798	92.6938	675.835	0.873545	65.9496	701.138	0.942095	41.8179	651.574	0.888844	35.8309	257.075	0.917705	34.2232	554.726	0.883652	80.618	965.764	0.799674	50.5425	245.681	0.799819	69.8327	348.291	0.82596	61.565	329.986	0.885274	62.3635	452.632
Bok	1	0	0	0.985779	4.79501	620.126	0.975066	18.1926	1117.28	1	0	0	1	0	0	0.99632	2.37676	694.927	0.993123	3.14046	1368.75	0.997568	1.1948	270.563	1	0	0	0.993142	2.85194	315.259	0.98457	8.3398	302.091	0.934711	10.4571	401.415	0.95792	11.5188	696.934	0.968061	6.36879	605.389	0.965979	11.0053	463.512
Bola1	0.807139	76.9718	287.164	0.810046	107.888	581.138	0.927723	60.6421	829.491	0.932162	34.9678	511.038	0.83437	79.1771	562.227	0.845246	109.331	942.96	0.822228	114.627	829.874	0.858394	114.701	747.647	0.702057	125.408	431.523	0.862034	68.4465	671.552	0.877362	80.618	968.94	0.567671	158.018	358.604	0.590619	192.94	486.302	0.607126	184.695	526.18	0.63212	236.003	705.482
Bola2	0.723186	134.207	462.144	0.805043	128.266	519.248	0.947489	60.6421	713.811	0.932162	34.9678	451.54	0.794433	139.602	519.97	0.912247	68.9262	1086.17	0.849666	103.635	489.662	0.890025	76.467	650.971	0.688613	140.764	442.954	0.919848	37.0752	789.068	0.910542	55.5986	674.107	0.508042	162.085	442.122	0.647461	149.024	511.525	0.583199	171.957	490.65	0.715549	152.852	607.286
Bola3	0.813285	57.2354	320.782	0.839689	95.9001	442.81	0.93351	48.5137	1061.31	1	0	0	0.783101	125.016	651.241	0.895606	73.6797	1139.33	0.833065	102.065	732.312	0.890664	64.5191	710.136	0.7148	110.052	524.852	0.931421	28.5194	350.8	0.941233	38.9191	975.231	0.432364	249.808	549.097	0.630577	180.701	546.787	0.592754	193.187	569.564	0.69756	190.759	845.428
Bop1	0.938993	13.8155	184.216	0.946889	23.975	401.912	0.983377	12.1284	677.824	1	0	0	0.966823	20.8361	443.36	0.944795	35.6515	740.972	0.957302	23.5534	534.715	0.971574	15.5324	358.419	0.980543	5.1187	96.5765	0.960822	19.9636	491.942	0.963996	19.4595	457.043	0.938338	9.87612	148.101	0.914136	21.5977	345.17	0.972914	6.36879	108.059	0.950858	15.8966	252.802
Bora	0.982569	3.94727	106.565	0.982224	5.99376	430.191	1	0	0	1	0	0	0.978996	8.33443	280	0.989865	9.50706	638.494	0.965616	15.7023	214.494	0.985407	7.16878	1033.46	0.990271	2.55935	155.352	0.979426	8.55581	311.237	1	0	0	0.97461	4.06664	287.496	0.971762	6.47932	323.67	1	0	0	0.99244	2.44563	992.232
Bpgm	0.973854	5.92091	143.545	0.93285	28.77	450.419	0.966755	24.2568	744.745	0.936662	43.7097	1201.51	0.926485	29.1705	457.563	0.952155	30.8979	740.013	0.947045	28.2641	398.759	0.96595	16.7272	994.752	0.931899	17.9155	764.731	0.986284	5.70387	266.585	0.98457	8.3398	868.529	0.900735	17.4285	200.267	0.93688	17.2782	238.655	0.915213	19.1064	373.545	0.948275	18.3422	326.784
Bphl	0.876542	35.5255	608.771	0.909817	39.5588	402.401	0.966755	24.2568	689.301	0.983041	8.74195	503.778	0.970002	14.5852	768.459	0.931262	47.5353	1019.16	0.893162	54.958	711.876	0.940722	32.2595	825.726	0.86952	40.9496	343.804	0.958852	17.1116	249.087	0.948566	27.7993	616.652	0.683468	70.2948	262.58	0.78355	76.312	346.044	0.687399	129.499	360.881	0.777786	123.504	535.724
Bpi	0.545168	298.019	653.446	0.730058	203.788	668.144	0.958444	30.321	1334.74	1	0	0	0.98554	8.33443	2667.14	1	0	0	0.996562	1.57023	2570.69	0.975678	11.948	999.062	0.990271	2.55935	579.039	0.972568	11.4077	740.735	1	0	0	1	0	0	1	0	0	1	0	0	1	0	0
Bpnt1	0.941556	15.7891	244.793	0.909801	33.5651	232.387	0.983377	12.1284	1554.86	0.852515	87.4195	366.086	0.915214	41.6721	701.501	0.921315	57.0424	786.751	0.881868	58.0985	501.12	0.963517	17.922	823.956	0.941628	15.3561	378.284	0.901203	48.4829	847.116	0.969139	16.6796	513.218	0.837277	38.9235	246.662	0.854239	41.7556	511.277	0.827333	48.8274	364.231	0.878793	51.3582	406.221
[truncated: 8,467 more rows]
