# Supplementary material for: An atlas of cell types in the mouse epididymis and vas deferens
Source: eLife. 2020 Jul 30;9:e55474. doi: 10.7554/eLife.55474 (PMC7426093; doi:10.7554/eLife.55474)
Supplement: Supplementary file 5. — List of antibodies used in IF studies throughout the manuscript. [file elife-55474-supp5.xlsx]

## Sheet: Sheet1
Primary antibody abreviation	Product information	Host	dillution
Krt5	ab52635 Anti-Cytokeratin 5 antibody [EP1601Y]	Rabbit recombinant monoclona	dillution 1:500
Abcg2	ab24115 Anti-BCRP/ABCG2 antibody [BXP-53]	Rat	dillution 1:50
Adm	ab69117 Anti-Adrenomedullin/ADM antibody	Rabbit polyclonal	dillution 1:250
Iapp	ab254259 Rabbit monoclonal [EPR22556-138] to Amylin/DAP	Rabbit monoclonal	dillution 1:50
Iapp	ab115766 Anti-Amylin/DAP antibody [R10/99]	Mouse monoclonal IgG1	dillution 1:50
V-ATPase	Cat# PA5-89832 V-ATPase G3 rabitt polyclonal antibody (Thermo Fisher Scientific)	Rabbit polyclonal	dillution 1:100
F4/80 -Emr1	Cat# 14-4801-81 F4/80 AG BM8 -Emr1 ThermoFisher	Rat / IgG2a, kappa monoclonal	dillution 1:250
MHC II	Cat# 14-5321-81 MHC Class II (I-A/I-E) ThermoFisher	Rat / IgG2b, kappa monoclonal antibody	dillution 1:500
Lgr5	ab75850 Anti-LGR5 antibody [EPR3065Y]	Rabbit monoclonal	dillution 1:50
Ptx3	Cat# MA5-33376 PTX3 Monoclonal Antibody (2C3) (Thermo Fisher Scientific)	Mouse monoclonal IgG1	dillution 1:50
Secondary antibodies used
ab7135	Goat Anti-Guinea pig IgG H&L (FITC) preadsorbed		dillution 1:500
ab150152	Donkey F(ab')2 Anti-Rat IgG H&L (Alexa Fluor® 594) preadsorbed		dillution 1:1000
ab150177	Donkey Anti-Sheep IgG H&L (Alexa Fluor® 488)		dillution 1:1000
ab150072	Donkey F(ab')2 Anti-Rabbit IgG H&L (Alexa Fluor® 594) preadsorbed		dillution 1:1000
ab150088	Goat polyclonal Secondary Antibody to Rabbit IgG - H&L (Alexa Fluor® 594), pre-adsorbed		dillution 1:1000
Catalog #: A21240	Goat anti-Mouse IgG1 Cross-Adsorbed Secondary Antibody, Alexa Fluor 647		dillution 1:500
Catalog #: A21208	Donkey anti-Rat IgG (H+L) Highly Cross-Adsorbed Secondary Antibody, Alexa Fluor 488		dillution 1:1000
Catalog #: A11017	F(ab')2-Goat anti-Mouse IgG (H+L) Cross-Adsorbed Secondary Antibody, Alexa Fluor 488		dillution 1:2000
